# Supplementary material for: Loss of G-Protein Pathway Suppressor 2 Promotes Tumor Growth Through Activation of AKT Signaling
Source: Front Cell Dev Biol. 2021 Jan 7;8:608044. doi: 10.3389/fcell.2020.608044 (PMC7817781; doi:10.3389/fcell.2020.608044)
Supplement: Supplementary file 6 [file Table_1.XLSX]

## Sheet: WT vs KO
	baseMean	log2FoldChange	lfcSE	stat	pvalue	padj	dispersion	rowmeans.control	rowmeans.treatment	ensembl_gene_id	hgnc_symbol	description
ENSG00000072274	39985.5	0.983223	0.0287759	34.1682	7.16668e-256	9.97602e-252	0.000760629	23674.3	48583.3	ENSG00000072274	TFRC	transferrin receptor [Source:HGNC Symbol;Acc:HGNC:11763]
ENSG00000214049	2200.74	2.8643	0.0891905	32.1144	2.77302e-226	1.93002e-222	0.00592883	414.333	3132.5	ENSG00000214049	UCA1	urothelial cancer associated 1 [Source:HGNC Symbol;Acc:HGNC:37126]
ENSG00000023171	1831.7	-1.43673	0.0478546	-30.0228	4.95037e-198	2.29697e-194	0.00170313	3088	1185.5	ENSG00000023171	GRAMD1B	GRAM domain containing 1B [Source:HGNC Symbol;Acc:HGNC:29214]
ENSG00000104738	9381.31	0.850041	0.032182	26.4135	9.5814e-154	3.33433e-150	0.000853688	5974.33	11180.5	ENSG00000104738	MCM4	minichromosome maintenance complex component 4 [Source:HGNC Symbol;Acc:HGNC:6947]
ENSG00000167747	1951.57	1.12311	0.0454804	24.6943	1.23039e-134	3.42541e-131	0.00122537	1068.67	2416.5	ENSG00000167747	C19orf48	chromosome 19 open reading frame 48 [Source:HGNC Symbol;Acc:HGNC:29667]
ENSG00000141076	3793.92	0.91531	0.0381868	23.9693	5.81577e-127	1.17463e-123	0.00104209	2333.33	4566.5	ENSG00000141076	UTP4	UTP4, small subunit processome component [Source:HGNC Symbol;Acc:HGNC:1983]
ENSG00000094804	7218.96	0.980592	0.0409114	23.9686	5.9069e-127	1.17463e-123	0.00141438	4282.67	8764.5	ENSG00000094804	CDC6	cell division cycle 6 [Source:HGNC Symbol;Acc:HGNC:1744]
ENSG00000108582	10612.6	-1.01494	0.0428156	-23.7049	3.21038e-124	5.58606e-121	0.00167735	15667	8040.33	ENSG00000108582	CPD	carboxypeptidase D [Source:HGNC Symbol;Acc:HGNC:2301]
ENSG00000131069	3985.28	-0.858464	0.0367379	-23.3673	9.19809e-121	1.42264e-117	0.00107205	5557.67	3182.17	ENSG00000131069	ACSS2	acyl-CoA synthetase short chain family member 2 [Source:HGNC Symbol;Acc:HGNC:15814]
ENSG00000147274	8952.48	0.700202	0.0301558	23.2194	2.89746e-119	4.03326e-116	0.000733843	6182.67	10424.5	ENSG00000147274	RBMX	RNA binding motif protein X-linked [Source:HGNC Symbol;Acc:HGNC:9910]
ENSG00000188554	8841.95	-0.711691	0.0310614	-22.9124	3.49851e-116	4.42721e-113	0.000824873	11675	7401.5	ENSG00000188554	NBR1	NBR1, autophagy cargo receptor [Source:HGNC Symbol;Acc:HGNC:6746]
ENSG00000065328	2864.3	0.902818	0.0397297	22.724	2.59333e-114	3.00826e-111	0.00104348	1773.33	3441.5	ENSG00000065328	MCM10	minichromosome maintenance 10 replication initiation factor [Source:HGNC Symbol;Acc:HGNC:18043]
ENSG00000163703	826.354	-1.19278	0.0525103	-22.7152	3.16835e-114	3.39257e-111	0.00156561	1292.67	587.333	ENSG00000163703	CRELD1	cysteine rich with EGF like domains 1 [Source:HGNC Symbol;Acc:HGNC:14630]
ENSG00000185033	3585.45	-1.06887	0.0481969	-22.1771	5.71587e-109	5.68321e-106	0.001983	5390.67	2664.33	ENSG00000185033	SEMA4B	semaphorin 4B [Source:HGNC Symbol;Acc:HGNC:10730]
ENSG00000156804	649.583	-1.66519	0.0758246	-21.9611	6.78433e-107	6.29586e-104	0.00408198	1170.33	382.667	ENSG00000156804	FBXO32	F-box protein 32 [Source:HGNC Symbol;Acc:HGNC:16731]
ENSG00000073849	1160.76	-1.19519	0.0557622	-21.4336	6.49073e-102	5.64694e-99	0.002216	1817.67	824.167	ENSG00000073849	ST6GAL1	ST6 beta-galactoside alpha-2,6-sialyltransferase 1 [Source:HGNC Symbol;Acc:HGNC:10860]
ENSG00000120800	7184.38	0.731825	0.0344199	21.2617	2.56952e-100	2.10399e-97	0.000961903	4875	8411.33	ENSG00000120800	UTP20	UTP20, small subunit processome component [Source:HGNC Symbol;Acc:HGNC:17897]
ENSG00000167861	571.864	-1.61028	0.076258	-21.1162	5.64608e-99	4.36631e-96	0.00396222	1014.33	344.833	ENSG00000167861	HID1	HID1 domain containing [Source:HGNC Symbol;Acc:HGNC:15736]
ENSG00000123505	4921.58	0.707624	0.033586	21.069	1.53173e-98	1.1222e-95	0.000828594	3384	5735.67	ENSG00000123505	AMD1	adenosylmethionine decarboxylase 1 [Source:HGNC Symbol;Acc:HGNC:457]
ENSG00000124193	11014.3	0.86437	0.0413346	20.9115	4.20539e-97	2.92695e-94	0.00152054	6965.67	13163.5	ENSG00000124193	SRSF6	serine and arginine rich splicing factor 6 [Source:HGNC Symbol;Acc:HGNC:10788]
ENSG00000054793	2716.03	-1.39474	0.0671891	-20.7585	1.0276e-95	6.81149e-93	0.00400369	4528.33	1786	ENSG00000054793	ATP9A	ATPase phospholipid transporting 9A (putative) [Source:HGNC Symbol;Acc:HGNC:13540]
ENSG00000100031	450.249	-1.58249	0.0775348	-20.4101	1.36123e-92	8.61287e-90	0.0037202	793	274.833	ENSG00000100031	GGT1	gamma-glutamyltransferase 1 [Source:HGNC Symbol;Acc:HGNC:4250]
ENSG00000167670	2817.33	0.864453	0.0425877	20.2982	1.33472e-91	8.07797e-89	0.00126895	1780	3364.83	ENSG00000167670	CHAF1A	chromatin assembly factor 1 subunit A [Source:HGNC Symbol;Acc:HGNC:1910]
ENSG00000076248	4653.13	0.834206	0.0411638	20.2655	2.59236e-91	1.50357e-88	0.00134471	2991.33	5530.17	ENSG00000076248	UNG	uracil DNA glycosylase [Source:HGNC Symbol;Acc:HGNC:12572]
ENSG00000164176	11669.6	-0.66028	0.0326864	-20.2004	9.70173e-91	5.40192e-88	0.000948856	15116.7	9928.33	ENSG00000164176	EDIL3	EGF like repeats and discoidin domains 3 [Source:HGNC Symbol;Acc:HGNC:3173]
ENSG00000276043	5433.2	0.906499	0.0449186	20.1809	1.44066e-90	7.71308e-88	0.00168887	3357.67	6527.67	ENSG00000276043	UHRF1	ubiquitin like with PHD and ring finger domains 1 [Source:HGNC Symbol;Acc:HGNC:12556]
ENSG00000120875	30485.7	-0.735623	0.0365242	-20.1407	3.24785e-90	1.67445e-87	0.00125227	40672.3	25325.7	ENSG00000120875	DUSP4	dual specificity phosphatase 4 [Source:HGNC Symbol;Acc:HGNC:3070]
ENSG00000197712	2396.11	-0.883304	0.0439004	-20.1206	4.86946e-90	2.42082e-87	0.00147826	3373.33	1897	ENSG00000197712	FAM114A1	family with sequence similarity 114 member A1 [Source:HGNC Symbol;Acc:HGNC:25087]
ENSG00000122952	4837.43	0.887189	0.0442736	20.0388	2.52857e-89	1.21371e-86	0.001605	3020.67	5797.33	ENSG00000122952	ZWINT	ZW10 interacting kinetochore protein [Source:HGNC Symbol;Acc:HGNC:13195]
ENSG00000117139	2782.65	-0.760647	0.03817	-19.9279	2.33319e-88	1.0826e-85	0.00107637	3745	2294.83	ENSG00000117139	KDM5B	lysine demethylase 5B [Source:HGNC Symbol;Acc:HGNC:18039]
ENSG00000265972	3561.99	-2.03589	0.102388	-19.8841	5.59012e-88	2.51015e-85	0.00979076	7025.67	1778.67	ENSG00000265972	TXNIP	thioredoxin interacting protein [Source:HGNC Symbol;Acc:HGNC:16952]
ENSG00000187498	4381.04	-0.714292	0.0362875	-19.6842	2.94324e-86	1.28031e-83	0.00105907	5793.33	3665.83	ENSG00000187498	COL4A1	collagen type IV alpha 1 chain [Source:HGNC Symbol;Acc:HGNC:2202]
ENSG00000119138	375.114	-2.35635	0.121078	-19.4614	2.33425e-84	9.84631e-82	0.0111655	791.333	160.833	ENSG00000119138	KLF9	Kruppel like factor 9 [Source:HGNC Symbol;Acc:HGNC:1123]
ENSG00000168906	8277.56	0.936376	0.0483735	19.3572	1.77262e-83	7.2573e-81	0.00208245	5023	9996.5	ENSG00000168906	MAT2A	methionine adenosyltransferase 2A [Source:HGNC Symbol;Acc:HGNC:6904]
ENSG00000152795	8720.79	0.581442	0.0301636	19.2763	8.50126e-83	3.38107e-80	0.000736604	6403.67	9953.67	ENSG00000152795	HNRNPDL	heterogeneous nuclear ribonucleoprotein D like [Source:HGNC Symbol;Acc:HGNC:5037]
ENSG00000025434	621.05	-1.49914	0.0779428	-19.2338	1.92806e-82	7.45516e-80	0.00436116	1068.33	391.833	ENSG00000025434	NR1H3	nuclear receptor subfamily 1 group H member 3 [Source:HGNC Symbol;Acc:HGNC:7966]
ENSG00000075651	1000.85	-1.363	0.0720081	-18.9284	6.65032e-80	2.50196e-77	0.00407809	1651.33	666.833	ENSG00000075651	PLD1	phospholipase D1 [Source:HGNC Symbol;Acc:HGNC:9067]
ENSG00000144730	2551.45	-0.850548	0.0452027	-18.8163	5.55452e-79	2.03471e-76	0.00161206	3547.33	2042.5	ENSG00000144730	IL17RD	interleukin 17 receptor D [Source:HGNC Symbol;Acc:HGNC:17616]
ENSG00000112655	5005.21	-0.653555	0.0350036	-18.6711	8.50949e-78	3.03723e-75	0.00099592	6466	4266	ENSG00000112655	PTK7	protein tyrosine kinase 7 (inactive) [Source:HGNC Symbol;Acc:HGNC:9618]
ENSG00000119707	8601.72	0.822911	0.0442813	18.5837	4.35211e-77	1.51453e-74	0.00173148	5561.33	10210.7	ENSG00000119707	RBM25	RNA binding motif protein 25 [Source:HGNC Symbol;Acc:HGNC:23244]
ENSG00000161547	4785.35	0.597099	0.0321591	18.567	5.93877e-77	2.01628e-74	0.000741511	3484.67	5475.83	ENSG00000161547	SRSF2	serine and arginine rich splicing factor 2 [Source:HGNC Symbol;Acc:HGNC:10783]
ENSG00000154646	337.251	-2.07554	0.111989	-18.5335	1.10922e-76	3.67628e-74	0.00903861	671	165.333	ENSG00000154646	TMPRSS15	transmembrane serine protease 15 [Source:HGNC Symbol;Acc:HGNC:9490]
ENSG00000139182	696.443	-1.11373	0.0601741	-18.5084	1.76738e-76	5.72137e-74	0.00219617	1061.67	509.333	ENSG00000139182	CLSTN3	calsyntenin 3 [Source:HGNC Symbol;Acc:HGNC:18371]
ENSG00000116560	17354.8	0.900085	0.048678	18.4906	2.45848e-76	7.77773e-74	0.00219886	10769.7	20846.7	ENSG00000116560	SFPQ	splicing factor proline and glutamine rich [Source:HGNC Symbol;Acc:HGNC:10774]
ENSG00000176597	1154.18	-0.930487	0.0514763	-18.076	4.92175e-73	1.52246e-70	0.00177174	1652.33	900	ENSG00000176597	B3GNT5	UDP-GlcNAc:betaGal beta-1,3-N-acetylglucosaminyltransferase 5 [Source:HGNC Symbol;Acc:HGNC:15684]
ENSG00000189057	2228.98	1.11411	0.0617068	18.0548	7.22806e-73	2.18727e-70	0.00299407	1229	2757.67	ENSG00000189057	FAM111B	family with sequence similarity 111 member B [Source:HGNC Symbol;Acc:HGNC:24200]
ENSG00000065308	14791.6	0.505784	0.0280731	18.0167	1.44185e-72	4.27033e-70	0.000678203	11300.3	16655.8	ENSG00000065308	TRAM2	translocation associated membrane protein 2 [Source:HGNC Symbol;Acc:HGNC:16855]
ENSG00000163975	968.062	-0.973015	0.0540806	-17.9919	2.25336e-72	6.53475e-70	0.00188757	1405.33	743.833	ENSG00000163975	MELTF	melanotransferrin [Source:HGNC Symbol;Acc:HGNC:7037]
ENSG00000186591	4452.04	-0.724045	0.0403137	-17.9603	3.98825e-72	1.13299e-69	0.00135883	5909	3711.83	ENSG00000186591	UBE2H	ubiquitin conjugating enzyme E2 H [Source:HGNC Symbol;Acc:HGNC:12484]
ENSG00000058668	3085.21	-0.839331	0.0468577	-17.9124	9.44598e-72	2.62976e-69	0.00181912	4275	2480.5	ENSG00000058668	ATP2B4	ATPase plasma membrane Ca2+ transporting 4 [Source:HGNC Symbol;Acc:HGNC:817]
ENSG00000171848	15437.2	1.05492	0.0589194	17.9044	1.0888e-71	2.97178e-69	0.00324219	8793.67	18933.5	ENSG00000171848	RRM2	ribonucleotide reductase regulatory subunit M2 [Source:HGNC Symbol;Acc:HGNC:10452]
ENSG00000158769	865.034	-0.983884	0.0551968	-17.825	4.51924e-71	1.20977e-68	0.00189533	1262.33	662.5	ENSG00000158769	F11R	F11 receptor [Source:HGNC Symbol;Acc:HGNC:14685]
ENSG00000124587	1703.25	-0.828851	0.0466183	-17.7795	1.01858e-70	2.6752e-68	0.0015615	2349	1373.17	ENSG00000124587	PEX6	peroxisomal biogenesis factor 6 [Source:HGNC Symbol;Acc:HGNC:8859]
ENSG00000135686	2485.46	-0.703615	0.0396774	-17.7334	2.31598e-70	5.97009e-68	0.00114893	3270	2086.67	ENSG00000135686	KLHL36	kelch like family member 36 [Source:HGNC Symbol;Acc:HGNC:17844]
ENSG00000143569	8738.24	0.697644	0.0394935	17.6648	7.83583e-70	1.98318e-67	0.00135548	6045	10170.2	ENSG00000143569	UBAP2L	ubiquitin associated protein 2 like [Source:HGNC Symbol;Acc:HGNC:29877]
ENSG00000164045	2297.98	1.155	0.06558	17.6121	1.98868e-69	4.94328e-67	0.00347594	1235.67	2855.83	ENSG00000164045	CDC25A	cell division cycle 25A [Source:HGNC Symbol;Acc:HGNC:1725]
ENSG00000106462	3583.25	0.721231	0.0410557	17.5671	4.39887e-69	1.07425e-66	0.00126717	2443.33	4185.33	ENSG00000106462	EZH2	enhancer of zeste 2 polycomb repressive complex 2 subunit [Source:HGNC Symbol;Acc:HGNC:3527]
ENSG00000167107	829.796	-1.40815	0.0804044	-17.5134	1.13288e-68	2.7189e-66	0.005117	1388.33	542.667	ENSG00000167107	ACSF2	acyl-CoA synthetase family member 2 [Source:HGNC Symbol;Acc:HGNC:26101]
ENSG00000186642	2476.55	-0.677679	0.0388221	-17.456	3.09809e-68	7.29442e-66	0.00108235	3227.33	2095.83	ENSG00000186642	PDE2A	phosphodiesterase 2A [Source:HGNC Symbol;Acc:HGNC:8777]
ENSG00000162645	1129.49	-1.30355	0.0746799	-17.4552	3.14414e-68	7.29442e-66	0.00456116	1832.67	769.667	ENSG00000162645	GBP2	guanylate binding protein 2 [Source:HGNC Symbol;Acc:HGNC:4183]
ENSG00000135763	1564.39	0.908169	0.0521289	17.4216	5.65855e-68	1.29126e-65	0.00174269	965.333	1879.83	ENSG00000135763	URB2	URB2 ribosome biogenesis homolog [Source:HGNC Symbol;Acc:HGNC:28967]
ENSG00000205978	340.055	-1.4912	0.0856311	-17.4142	6.43683e-68	1.44517e-65	0.00435301	584	215.333	ENSG00000205978	NYNRIN	NYN domain and retroviral integrase containing [Source:HGNC Symbol;Acc:HGNC:20165]
ENSG00000101773	3727.97	0.696836	0.0401675	17.3482	2.03387e-67	4.49388e-65	0.00121465	2580	4338.33	ENSG00000101773	RBBP8	RB binding protein 8, endonuclease [Source:HGNC Symbol;Acc:HGNC:9891]
ENSG00000262074	769.522	1.52928	0.0882754	17.324	3.10188e-67	6.7466e-65	0.00515201	333	998.833	ENSG00000262074	SNORD3B-2	small nucleolar RNA, C/D box 3B-2 [Source:HGNC Symbol;Acc:HGNC:33190]
ENSG00000095319	8357.43	0.526248	0.0304053	17.3077	4.11231e-67	8.80668e-65	0.000747405	6318	9446.17	ENSG00000095319	NUP188	nucleoporin 188 [Source:HGNC Symbol;Acc:HGNC:17859]
ENSG00000134013	15065.9	-0.715972	0.0413831	-17.3011	4.61712e-67	9.73792e-65	0.00158563	19941.7	12592.7	ENSG00000134013	LOXL2	lysyl oxidase like 2 [Source:HGNC Symbol;Acc:HGNC:6666]
ENSG00000132563	316.799	-1.6684	0.0965514	-17.28	6.65952e-67	1.38271e-64	0.00599831	571	186.333	ENSG00000132563	REEP2	receptor accessory protein 2 [Source:HGNC Symbol;Acc:HGNC:17975]
ENSG00000070081	2758.85	-0.724318	0.0419186	-17.2791	6.75462e-67	1.38271e-64	0.00136124	3663.33	2301.83	ENSG00000070081	NUCB2	nucleobindin 2 [Source:HGNC Symbol;Acc:HGNC:8044]
ENSG00000156471	5411.48	0.846344	0.049006	17.2702	7.88453e-67	1.59062e-64	0.00206274	3456.67	6443	ENSG00000156471	PTDSS1	phosphatidylserine synthase 1 [Source:HGNC Symbol;Acc:HGNC:9587]
ENSG00000198176	8751.93	0.559035	0.0324323	17.237	1.4009e-66	2.7858e-64	0.000874615	6506.67	9948.17	ENSG00000198176	TFDP1	transcription factor Dp-1 [Source:HGNC Symbol;Acc:HGNC:11749]
ENSG00000060339	6065.06	0.679044	0.039613	17.1419	7.22077e-66	1.41568e-63	0.00130283	4234	7038.5	ENSG00000060339	CCAR1	cell division cycle and apoptosis regulator 1 [Source:HGNC Symbol;Acc:HGNC:24236]
ENSG00000125944	10139.6	0.41293	0.0241226	17.118	1.0902e-65	2.10772e-63	0.000447262	8121.67	11226	ENSG00000125944	HNRNPR	heterogeneous nuclear ribonucleoprotein R [Source:HGNC Symbol;Acc:HGNC:5047]
ENSG00000139289	15000.7	-0.851182	0.0498848	-17.0629	2.80125e-65	5.34157e-63	0.00233145	20871.7	12014.2	ENSG00000139289	PHLDA1	pleckstrin homology like domain family A member 1 [Source:HGNC Symbol;Acc:HGNC:8933]
ENSG00000119801	1889.75	-0.830345	0.0487258	-17.0412	4.06381e-65	7.64435e-63	0.00180663	2610.67	1522.67	ENSG00000119801	YPEL5	yippee like 5 [Source:HGNC Symbol;Acc:HGNC:18329]
ENSG00000175782	940	1.13206	0.0666437	16.9868	1.02858e-64	1.90904e-62	0.00267929	512.333	1166.17	ENSG00000175782	SLC35E3	solute carrier family 35 member E3 [Source:HGNC Symbol;Acc:HGNC:20864]
ENSG00000165801	1547.2	-0.855913	0.0504204	-16.9755	1.24605e-64	2.28225e-62	0.00186362	2157	1236.33	ENSG00000165801	ARHGEF40	Rho guanine nucleotide exchange factor 40 [Source:HGNC Symbol;Acc:HGNC:25516]
ENSG00000112081	12186.7	0.508947	0.0301379	16.8872	5.58565e-64	1.00977e-61	0.000776693	9293.33	13730.7	ENSG00000112081	SRSF3	serine and arginine rich splicing factor 3 [Source:HGNC Symbol;Acc:HGNC:10785]
ENSG00000160949	3250.86	0.842633	0.0500652	16.8307	1.45358e-63	2.59408e-61	0.00200138	2078.33	3870	ENSG00000160949	TONSL	tonsoku like, DNA repair protein [Source:HGNC Symbol;Acc:HGNC:7801]
ENSG00000105676	3019.57	0.903171	0.0536963	16.82	1.74223e-63	3.06985e-61	0.00232149	1868	3627.67	ENSG00000105676	ARMC6	armadillo repeat containing 6 [Source:HGNC Symbol;Acc:HGNC:25049]
ENSG00000165480	2704.64	0.814347	0.048498	16.7913	2.82379e-63	4.91339e-61	0.00177618	1757.67	3205.83	ENSG00000165480	SKA3	spindle and kinetochore associated complex subunit 3 [Source:HGNC Symbol;Acc:HGNC:20262]
ENSG00000134690	3904.55	0.601048	0.0359208	16.7326	7.58734e-63	1.3039e-60	0.000930282	2841	4470.67	ENSG00000134690	CDCA8	cell division cycle associated 8 [Source:HGNC Symbol;Acc:HGNC:14629]
ENSG00000188807	1601.24	0.929902	0.0555908	16.7276	8.24428e-63	1.39952e-60	0.00211355	977.333	1931	ENSG00000188807	TMEM201	transmembrane protein 201 [Source:HGNC Symbol;Acc:HGNC:33719]
ENSG00000130204	5325.25	0.93822	0.0562059	16.6926	1.48475e-62	2.49009e-60	0.00277728	3236.67	6429.17	ENSG00000130204	TOMM40	translocase of outer mitochondrial membrane 40 [Source:HGNC Symbol;Acc:HGNC:18001]
ENSG00000088205	5308.82	0.488084	0.0292865	16.6658	2.32326e-62	3.84997e-60	0.000605152	4093	5957.5	ENSG00000088205	DDX18	DEAD-box helicase 18 [Source:HGNC Symbol;Acc:HGNC:2741]
ENSG00000149177	8187.37	-1.18255	0.0710733	-16.6385	3.66936e-62	6.00912e-60	0.00474452	12780.7	5843.5	ENSG00000149177	PTPRJ	protein tyrosine phosphatase, receptor type J [Source:HGNC Symbol;Acc:HGNC:9673]
ENSG00000123473	3558.21	0.754031	0.0453803	16.6158	5.35508e-62	8.66776e-60	0.00161947	2387.33	4178.83	ENSG00000123473	STIL	STIL, centriolar assembly protein [Source:HGNC Symbol;Acc:HGNC:10879]
ENSG00000064703	2719.25	0.646473	0.0391038	16.5322	2.15001e-61	3.44001e-59	0.00101751	1931	3137.33	ENSG00000064703	DDX20	DEAD-box helicase 20 [Source:HGNC Symbol;Acc:HGNC:2743]
ENSG00000020129	1290.29	1.05031	0.0635773	16.5202	2.62679e-61	4.15511e-59	0.00276682	736	1582.33	ENSG00000020129	NCDN	neurochondrin [Source:HGNC Symbol;Acc:HGNC:17597]
ENSG00000156453	747.276	-1.37928	0.083651	-16.4885	4.44127e-61	6.94635e-59	0.00551109	1241.67	494.333	ENSG00000156453	PCDH1	protocadherin 1 [Source:HGNC Symbol;Acc:HGNC:8655]
ENSG00000114491	1702.01	0.773734	0.0469278	16.4878	4.49351e-61	6.94997e-59	0.00135924	1130	2005	ENSG00000114491	UMPS	uridine monophosphate synthetase [Source:HGNC Symbol;Acc:HGNC:12563]
ENSG00000179409	4738.92	0.697745	0.0423427	16.4785	5.23424e-61	8.00667e-59	0.0014586	3276.33	5515.17	ENSG00000179409	GEMIN4	gem nuclear organelle associated protein 4 [Source:HGNC Symbol;Acc:HGNC:15717]
ENSG00000173546	1958.24	-1.4717	0.0893217	-16.4764	5.42195e-61	8.20365e-59	0.00719947	3335	1250.67	ENSG00000173546	CSPG4	chondroitin sulfate proteoglycan 4 [Source:HGNC Symbol;Acc:HGNC:2466]
ENSG00000092201	17213.4	0.373987	0.0227293	16.4539	7.85888e-61	1.1763e-58	0.000431316	14061	18909.7	ENSG00000092201	SUPT16H	SPT16 homolog, facilitates chromatin remodeling subunit [Source:HGNC Symbol;Acc:HGNC:11465]
ENSG00000116678	949.46	-1.27152	0.0774195	-16.4237	1.29369e-60	1.91576e-58	0.00481214	1522.33	655.333	ENSG00000116678	LEPR	leptin receptor [Source:HGNC Symbol;Acc:HGNC:6554]
ENSG00000133119	1737.76	0.647427	0.0396373	16.3338	5.67474e-60	8.31499e-58	0.000802652	1233.67	2006.17	ENSG00000133119	RFC3	replication factor C subunit 3 [Source:HGNC Symbol;Acc:HGNC:9971]
ENSG00000108828	14782.2	-0.56964	0.0349119	-16.3165	7.53568e-60	1.09267e-57	0.00110924	18476.3	12916.8	ENSG00000108828	VAT1	vesicle amine transport 1 [Source:HGNC Symbol;Acc:HGNC:16919]
ENSG00000184117	1284.89	-1.42851	0.0876692	-16.2944	1.08239e-59	1.55328e-57	0.00667678	2163	833.667	ENSG00000184117	NIPSNAP1	nipsnap homolog 1 [Source:HGNC Symbol;Acc:HGNC:7827]
ENSG00000198824	2562.67	0.791484	0.048655	16.2673	1.68487e-59	2.3932e-57	0.00176854	1685.33	3026.83	ENSG00000198824	CHAMP1	chromosome alignment maintaining phosphoprotein 1 [Source:HGNC Symbol;Acc:HGNC:20311]
ENSG00000141994	841.922	1.05176	0.0647759	16.2369	2.76572e-59	3.88877e-57	0.00231906	480	1033.17	ENSG00000141994	DUS3L	dihydrouridine synthase 3 like [Source:HGNC Symbol;Acc:HGNC:26920]
ENSG00000025770	1519.78	0.752096	0.0465157	16.1687	8.39028e-59	1.16793e-56	0.00123838	1020	1783.83	ENSG00000025770	NCAPH2	non-SMC condensin II complex subunit H2 [Source:HGNC Symbol;Acc:HGNC:25071]
ENSG00000127946	1364.95	-0.911125	0.0565442	-16.1135	2.0511e-58	2.82686e-56	0.00241693	1937.67	1071.67	ENSG00000127946	HIP1	huntingtin interacting protein 1 [Source:HGNC Symbol;Acc:HGNC:4913]
ENSG00000197971	3085.2	-0.815689	0.0507539	-16.0715	4.04465e-58	5.51976e-56	0.00218421	4233.67	2499.33	ENSG00000197971	MBP	myelin basic protein [Source:HGNC Symbol;Acc:HGNC:6925]
ENSG00000123136	5594.27	0.721242	0.044958	16.0426	6.44311e-58	8.70759e-56	0.00171642	3821.67	6537.17	ENSG00000123136	DDX39A	DExD-box helicase 39A [Source:HGNC Symbol;Acc:HGNC:17821]
ENSG00000197183	2044.5	-0.800092	0.0498974	-16.0347	7.30909e-58	9.78293e-56	0.00195288	2790.33	1663.83	ENSG00000197183	NOL4L	nucleolar protein 4 like [Source:HGNC Symbol;Acc:HGNC:16106]
ENSG00000157064	1097.37	-1.15267	0.0719817	-16.0134	1.03101e-57	1.36682e-55	0.00416351	1696.67	791.167	ENSG00000157064	NMNAT2	nicotinamide nucleotide adenylyltransferase 2 [Source:HGNC Symbol;Acc:HGNC:16789]
ENSG00000197785	1784.68	0.819206	0.0512381	15.9882	1.54394e-57	2.02752e-55	0.00178802	1156	2118	ENSG00000197785	ATAD3A	ATPase family, AAA domain containing 3A [Source:HGNC Symbol;Acc:HGNC:25567]
ENSG00000160179	155.23	-2.2057	0.138214	-15.9586	2.48269e-57	3.22982e-55	0.0115928	318.333	71.5	ENSG00000160179	ABCG1	ATP binding cassette subfamily G member 1 [Source:HGNC Symbol;Acc:HGNC:73]
ENSG00000244462	6229.77	0.744842	0.0467522	15.9317	3.81888e-57	4.92212e-55	0.00189575	4203.67	7308.17	ENSG00000244462	RBM12	RNA binding motif protein 12 [Source:HGNC Symbol;Acc:HGNC:9898]
ENSG00000171940	5001.43	-0.544502	0.0342539	-15.8961	6.74624e-57	8.61538e-55	0.000943849	6187	4402.83	ENSG00000171940	ZNF217	zinc finger protein 217 [Source:HGNC Symbol;Acc:HGNC:13009]
ENSG00000073111	6568.92	0.536915	0.0338006	15.8848	8.07996e-57	1.02248e-54	0.00091785	4940.33	7436.83	ENSG00000073111	MCM2	minichromosome maintenance complex component 2 [Source:HGNC Symbol;Acc:HGNC:6944]
ENSG00000049541	3073.01	0.613621	0.0386628	15.8711	1.00453e-56	1.25974e-54	0.00104128	2221	3527	ENSG00000049541	RFC2	replication factor C subunit 2 [Source:HGNC Symbol;Acc:HGNC:9970]
ENSG00000128191	1594.13	0.827766	0.0522703	15.8362	1.74962e-56	2.17453e-54	0.00180009	1027	1894.67	ENSG00000128191	DGCR8	DGCR8, microprocessor complex subunit [Source:HGNC Symbol;Acc:HGNC:2847]
ENSG00000003436	4846.95	-0.847172	0.0537469	-15.7623	5.65693e-56	6.96853e-54	0.00259081	6735.33	3887.67	ENSG00000003436	TFPI	tissue factor pathway inhibitor [Source:HGNC Symbol;Acc:HGNC:11760]
ENSG00000132773	783.751	1.25895	0.0799069	15.7552	6.32503e-56	7.72319e-54	0.00411843	398	986.333	ENSG00000132773	TOE1	target of EGR1, exonuclease [Source:HGNC Symbol;Acc:HGNC:15954]
ENSG00000178150	2691.26	2.33526	0.148482	15.7275	9.79349e-56	1.18544e-53	0.0201577	712.667	3718.67	ENSG00000178150	ZNF114	zinc finger protein 114 [Source:HGNC Symbol;Acc:HGNC:12894]
ENSG00000183527	1703.52	0.777932	0.049555	15.6984	1.5519e-55	1.86228e-53	0.00160224	1127.67	2009	ENSG00000183527	PSMG1	proteasome assembly chaperone 1 [Source:HGNC Symbol;Acc:HGNC:3043]
ENSG00000166750	858.75	-1.81507	0.116353	-15.5996	7.31991e-55	8.70881e-53	0.0118894	1606	474.667	ENSG00000166750	SLFN5	schlafen family member 5 [Source:HGNC Symbol;Acc:HGNC:28286]
ENSG00000075415	21621.4	0.396318	0.0254784	15.555	1.47063e-54	1.73485e-52	0.000571568	17463	23857.7	ENSG00000075415	SLC25A3	solute carrier family 25 member 3 [Source:HGNC Symbol;Acc:HGNC:10989]
ENSG00000270647	10542.8	0.6444	0.0414335	15.5526	1.52661e-54	1.78575e-52	0.00153315	7496	12167	ENSG00000270647	TAF15	TATA-box binding protein associated factor 15 [Source:HGNC Symbol;Acc:HGNC:11547]
ENSG00000166340	4710.97	-1.00493	0.0647076	-15.5303	2.16249e-54	2.50849e-52	0.00383379	6926.67	3584.67	ENSG00000166340	TPP1	tripeptidyl peptidase 1 [Source:HGNC Symbol;Acc:HGNC:2073]
ENSG00000162408	4091.52	0.74773	0.0481535	15.5281	2.24074e-54	2.57777e-52	0.0019163	2755.33	4800.5	ENSG00000162408	NOL9	nucleolar protein 9 [Source:HGNC Symbol;Acc:HGNC:26265]
ENSG00000130340	3999.5	-0.498092	0.0322456	-15.4468	7.928e-54	9.04572e-52	0.000768255	4856.33	3568.33	ENSG00000130340	SNX9	sorting nexin 9 [Source:HGNC Symbol;Acc:HGNC:14973]
ENSG00000112118	11795.4	0.442676	0.028672	15.4393	8.90215e-54	1.00746e-51	0.000692818	9302	13125.5	ENSG00000112118	MCM3	minichromosome maintenance complex component 3 [Source:HGNC Symbol;Acc:HGNC:6945]
ENSG00000148229	3175.68	0.743696	0.0481721	15.4383	9.04469e-54	1.01534e-51	0.00182871	2141.67	3722.67	ENSG00000148229	POLE3	DNA polymerase epsilon 3, accessory subunit [Source:HGNC Symbol;Acc:HGNC:13546]
ENSG00000135365	1009.68	-0.944773	0.061337	-15.403	1.5629e-53	1.74045e-51	0.00273008	1452.33	783.833	ENSG00000135365	PHF21A	PHD finger protein 21A [Source:HGNC Symbol;Acc:HGNC:24156]
ENSG00000215301	19778.5	0.705191	0.0457974	15.3981	1.68645e-53	1.86312e-51	0.00195192	13625.3	23030	ENSG00000215301	DDX3X	DEAD-box helicase 3 X-linked [Source:HGNC Symbol;Acc:HGNC:2745]
ENSG00000134107	4273.85	-1.17049	0.0760443	-15.3922	1.84743e-53	2.0249e-51	0.00534718	6654.67	3061.5	ENSG00000134107	BHLHE40	basic helix-loop-helix family member e40 [Source:HGNC Symbol;Acc:HGNC:1046]
ENSG00000111058	1357.84	-1.15511	0.0752743	-15.3453	3.80738e-53	4.14053e-51	0.00478573	2101.67	978.333	ENSG00000111058	ACSS3	acyl-CoA synthetase short chain family member 3 [Source:HGNC Symbol;Acc:HGNC:24723]
ENSG00000261236	5385.48	0.672256	0.04383	15.3378	4.27324e-53	4.61112e-51	0.00161564	3771.33	6241.17	ENSG00000261236	BOP1	block of proliferation 1 [Source:HGNC Symbol;Acc:HGNC:15519]
ENSG00000132535	1522.85	-0.849812	0.0554363	-15.3295	4.85464e-53	5.1982e-51	0.00236435	2115.67	1219.5	ENSG00000132535	DLG4	discs large MAGUK scaffold protein 4 [Source:HGNC Symbol;Acc:HGNC:2903]
ENSG00000085840	859.442	1.00478	0.065574	15.3228	5.38579e-53	5.72291e-51	0.00248658	502.667	1047	ENSG00000085840	ORC1	origin recognition complex subunit 1 [Source:HGNC Symbol;Acc:HGNC:8487]
ENSG00000111605	3652.21	0.620723	0.0405388	15.3118	6.37465e-53	6.72235e-51	0.00124584	2630.33	4196.33	ENSG00000111605	CPSF6	cleavage and polyadenylation specific factor 6 [Source:HGNC Symbol;Acc:HGNC:13871]
ENSG00000093009	1812.7	0.665696	0.0434796	15.3105	6.50257e-53	6.8057e-51	0.00113401	1274	2097.5	ENSG00000093009	CDC45	cell division cycle 45 [Source:HGNC Symbol;Acc:HGNC:1739]
ENSG00000099901	6094.51	0.541144	0.0354297	15.2738	1.14376e-52	1.18814e-50	0.00101194	4572.67	6908.83	ENSG00000099901	RANBP1	RAN binding protein 1 [Source:HGNC Symbol;Acc:HGNC:9847]
ENSG00000100726	1379.6	0.768641	0.0503989	15.2511	1.61772e-52	1.66805e-50	0.0015087	917.333	1623.83	ENSG00000100726	TELO2	telomere maintenance 2 [Source:HGNC Symbol;Acc:HGNC:29099]
ENSG00000166166	552.463	1.35575	0.0889563	15.2406	1.90121e-52	1.94595e-50	0.0046114	265	703.833	ENSG00000166166	TRMT61A	tRNA methyltransferase 61A [Source:HGNC Symbol;Acc:HGNC:23790]
ENSG00000110492	1247.16	-1.03277	0.0677769	-15.2378	1.98562e-52	2.01751e-50	0.00369802	1850.33	938.333	ENSG00000110492	MDK	midkine [Source:HGNC Symbol;Acc:HGNC:6972]
ENSG00000090238	385.582	-1.19979	0.0787412	-15.2372	2.00391e-52	2.02134e-50	0.00363355	604.333	273.167	ENSG00000090238	YPEL3	yippee like 3 [Source:HGNC Symbol;Acc:HGNC:18327]
ENSG00000181222	19798.3	0.968235	0.0635922	15.2257	2.38836e-52	2.39179e-50	0.00381551	11825.3	24011	ENSG00000181222	POLR2A	RNA polymerase II subunit A [Source:HGNC Symbol;Acc:HGNC:9187]
ENSG00000114867	55582.1	0.385347	0.025337	15.2089	3.08783e-52	3.06749e-50	0.000596629	45144.3	61190.2	ENSG00000114867	EIF4G1	eukaryotic translation initiation factor 4 gamma 1 [Source:HGNC Symbol;Acc:HGNC:3296]
ENSG00000130935	5108.99	0.578803	0.0380579	15.2085	3.10716e-52	3.06749e-50	0.00115701	3759.33	5827.67	ENSG00000130935	NOL11	nucleolar protein 11 [Source:HGNC Symbol;Acc:HGNC:24557]
ENSG00000127564	1436.49	0.785865	0.0517814	15.1766	5.05515e-52	4.95547e-50	0.00167552	947.333	1695.83	ENSG00000127564	PKMYT1	protein kinase, membrane associated tyrosine/threonine 1 [Source:HGNC Symbol;Acc:HGNC:29650]
ENSG00000121152	3456.6	0.560354	0.0369311	15.1729	5.34317e-52	5.20119e-50	0.000965848	2569	3929.67	ENSG00000121152	NCAPH	non-SMC condensin I complex subunit H [Source:HGNC Symbol;Acc:HGNC:1112]
ENSG00000071537	4208.66	-0.555567	0.0366225	-15.1701	5.58097e-52	5.39494e-50	0.00107088	5232.67	3695	ENSG00000071537	SEL1L	SEL1L, ERAD E3 ligase adaptor subunit [Source:HGNC Symbol;Acc:HGNC:10717]
ENSG00000186866	1197.87	-0.723287	0.0477066	-15.1611	6.39431e-52	6.13853e-50	0.00143321	1587.67	999.333	ENSG00000186866	POFUT2	protein O-fucosyltransferase 2 [Source:HGNC Symbol;Acc:HGNC:14683]
ENSG00000121895	1802.14	-0.722584	0.0476631	-15.1602	6.4843e-52	6.18229e-50	0.00168194	2391.67	1503.67	ENSG00000121895	TMEM156	transmembrane protein 156 [Source:HGNC Symbol;Acc:HGNC:26260]
ENSG00000119899	1642.25	-0.824718	0.0544531	-15.1455	8.11651e-52	7.68584e-50	0.00230271	2261.33	1325.67	ENSG00000119899	SLC17A5	solute carrier family 17 member 5 [Source:HGNC Symbol;Acc:HGNC:10933]
ENSG00000197771	8111.69	0.487746	0.032227	15.1347	9.56209e-52	8.99354e-50	0.000854641	6255.33	9103.67	ENSG00000197771	MCMBP	minichromosome maintenance complex binding protein [Source:HGNC Symbol;Acc:HGNC:25782]
ENSG00000163781	3989.23	0.465215	0.0308339	15.0878	1.94814e-51	1.82001e-49	0.000624319	3111	4459.33	ENSG00000163781	TOPBP1	DNA topoisomerase II binding protein 1 [Source:HGNC Symbol;Acc:HGNC:17008]
ENSG00000135829	14215.9	0.571397	0.0378856	15.0822	2.12136e-51	1.96862e-49	0.00129504	10506	16190.7	ENSG00000135829	DHX9	DExH-box helicase 9 [Source:HGNC Symbol;Acc:HGNC:2750]
ENSG00000186470	881.944	-0.842669	0.055922	-15.0686	2.60384e-51	2.40036e-49	0.00198822	1222	707.667	ENSG00000186470	BTN3A2	butyrophilin subfamily 3 member A2 [Source:HGNC Symbol;Acc:HGNC:1139]
ENSG00000189306	3823.59	0.661522	0.0439327	15.0576	3.07634e-51	2.81728e-49	0.00153152	2695.33	4423	ENSG00000189306	RRP7A	ribosomal RNA processing 7 homolog A [Source:HGNC Symbol;Acc:HGNC:24286]
ENSG00000147852	1137.03	-1.13292	0.0754492	-15.0157	5.79137e-51	5.26901e-49	0.00468363	1747.33	826	ENSG00000147852	VLDLR	very low density lipoprotein receptor [Source:HGNC Symbol;Acc:HGNC:12698]
ENSG00000156398	1126.6	0.91455	0.0609522	15.0044	6.87243e-51	6.21196e-49	0.00236086	692.333	1355.83	ENSG00000156398	SFXN2	sideroflexin 2 [Source:HGNC Symbol;Acc:HGNC:16086]
ENSG00000099954	162.509	-1.86634	0.124546	-14.9852	9.17389e-51	8.23874e-49	0.00893417	308	87.6667	ENSG00000099954	CECR2	CECR2, histone acetyl-lysine reader [Source:HGNC Symbol;Acc:HGNC:1840]
ENSG00000109654	1640.59	-0.993658	0.0663593	-14.9739	1.08763e-50	9.70498e-49	0.00368706	2404.33	1253.17	ENSG00000109654	TRIM2	tripartite motif containing 2 [Source:HGNC Symbol;Acc:HGNC:15974]
ENSG00000164463	1179.23	-0.887112	0.0592571	-14.9706	1.14352e-50	1.01387e-48	0.00261515	1662.67	933.333	ENSG00000164463	CREBRF	CREB3 regulatory factor [Source:HGNC Symbol;Acc:HGNC:24050]
ENSG00000138074	2732.08	0.643081	0.0430178	14.9492	1.57627e-50	1.38872e-48	0.00132904	1943.67	3151.5	ENSG00000138074	SLC5A6	solute carrier family 5 member 6 [Source:HGNC Symbol;Acc:HGNC:11041]
ENSG00000104524	749.012	0.991014	0.0663214	14.9426	1.74079e-50	1.52401e-48	0.00235011	441.667	911.333	ENSG00000104524	PYCR3	pyrroline-5-carboxylate reductase 3 [Source:HGNC Symbol;Acc:HGNC:25846]
ENSG00000128973	867.128	0.976651	0.0654994	14.9108	2.80218e-50	2.43789e-48	0.0025115	516	1053.33	ENSG00000128973	CLN6	CLN6, transmembrane ER protein [Source:HGNC Symbol;Acc:HGNC:2077]
ENSG00000132603	2639.25	0.778935	0.0523108	14.8905	3.79796e-50	3.2837e-48	0.00214026	1747.67	3111	ENSG00000132603	NIP7	NIP7, nucleolar pre-rRNA processing protein [Source:HGNC Symbol;Acc:HGNC:24328]
ENSG00000153187	34873.1	0.43106	0.0289638	14.8827	4.26781e-50	3.66715e-48	0.000773377	27685	38737.7	ENSG00000153187	HNRNPU	heterogeneous nuclear ribonucleoprotein U [Source:HGNC Symbol;Acc:HGNC:5048]
ENSG00000143476	2992.36	0.718425	0.0483405	14.8618	5.83583e-50	4.98372e-48	0.00182377	2046	3492	ENSG00000143476	DTL	denticleless E3 ubiquitin protein ligase homolog [Source:HGNC Symbol;Acc:HGNC:30288]
ENSG00000146122	636.68	-0.96575	0.0649901	-14.8599	5.99723e-50	5.09033e-48	0.00265593	923.333	490.833	ENSG00000146122	DAAM2	dishevelled associated activator of morphogenesis 2 [Source:HGNC Symbol;Acc:HGNC:18143]
ENSG00000163950	2810.5	0.564465	0.0380075	14.8514	6.81356e-50	5.74817e-48	0.000963525	2083.67	3198.17	ENSG00000163950	SLBP	stem-loop binding protein [Source:HGNC Symbol;Acc:HGNC:10904]
ENSG00000184500	1299.05	-0.955517	0.0644164	-14.8334	8.90525e-50	7.46754e-48	0.00329942	1875.67	1004.83	ENSG00000184500	PROS1	protein S [Source:HGNC Symbol;Acc:HGNC:9456]
ENSG00000283646	258.153	1.72699	0.116479	14.8267	9.8517e-50	8.21172e-48	0.00534578	99.3333	341.167	ENSG00000283646	LINC02009	long intergenic non-protein coding RNA 2009 [Source:HGNC Symbol;Acc:HGNC:52845]
ENSG00000172340	3981.79	-0.553254	0.0373507	-14.8124	1.21764e-49	1.00891e-47	0.00111015	4942.33	3497.17	ENSG00000172340	SUCLG2	succinate-CoA ligase GDP-forming beta subunit [Source:HGNC Symbol;Acc:HGNC:11450]
ENSG00000197467	9345.55	-0.680058	0.0459457	-14.8013	1.43591e-49	1.18271e-47	0.00193152	12195.3	7907.33	ENSG00000197467	COL13A1	collagen type XIII alpha 1 chain [Source:HGNC Symbol;Acc:HGNC:2190]
ENSG00000234745	3908.23	-0.970815	0.0657368	-14.7682	2.34888e-49	1.92332e-47	0.00392378	5681.67	3006	ENSG00000234745	HLA-B	major histocompatibility complex, class I, B [Source:HGNC Symbol;Acc:HGNC:4932]
ENSG00000026751	885.951	1.33688	0.0905503	14.764	2.50082e-49	2.03576e-47	0.00602876	429.667	1125.83	ENSG00000026751	SLAMF7	SLAM family member 7 [Source:HGNC Symbol;Acc:HGNC:21394]
ENSG00000140564	3290.67	-0.721312	0.0488941	-14.7525	2.96367e-49	2.39851e-47	0.00202272	4365.33	2745.83	ENSG00000140564	FURIN	furin, paired basic amino acid cleaving enzyme [Source:HGNC Symbol;Acc:HGNC:8568]
ENSG00000124160	2883.15	1.13983	0.0773988	14.7267	4.34343e-49	3.49483e-47	0.0052365	1567.33	3577	ENSG00000124160	NCOA5	nuclear receptor coactivator 5 [Source:HGNC Symbol;Acc:HGNC:15909]
ENSG00000233276	5794.87	0.808198	0.054905	14.7199	4.80162e-49	3.8413e-47	0.00267135	3780	6862	ENSG00000233276	GPX1	glutathione peroxidase 1 [Source:HGNC Symbol;Acc:HGNC:4553]
ENSG00000019582	85.4751	-3.7063	0.252199	-14.6959	6.8481e-49	5.44717e-47	0.038779	218	17.3333	ENSG00000019582	CD74	CD74 molecule [Source:HGNC Symbol;Acc:HGNC:1697]
ENSG00000011304	18295.8	0.471697	0.0321222	14.6845	8.10884e-49	6.41335e-47	0.000928279	14228	20472	ENSG00000011304	PTBP1	polypyrimidine tract binding protein 1 [Source:HGNC Symbol;Acc:HGNC:9583]
ENSG00000166173	1703.84	-0.760558	0.0518305	-14.674	9.46659e-49	7.44491e-47	0.00205278	2293	1404.5	ENSG00000166173	LARP6	La ribonucleoprotein domain family member 6 [Source:HGNC Symbol;Acc:HGNC:24012]
ENSG00000071967	2726.51	-0.590921	0.0402926	-14.6658	1.06827e-48	8.35415e-47	0.00122498	3439	2368.17	ENSG00000071967	CYBRD1	cytochrome b reductase 1 [Source:HGNC Symbol;Acc:HGNC:20797]
ENSG00000011028	1336.5	-0.975918	0.066621	-14.6488	1.37094e-48	1.06612e-46	0.0035965	1946.67	1026.17	ENSG00000011028	MRC2	mannose receptor C type 2 [Source:HGNC Symbol;Acc:HGNC:16875]
ENSG00000177728	2348.18	-0.635354	0.0434295	-14.6296	1.81985e-48	1.40735e-46	0.00142503	3009	2013.17	ENSG00000177728	TMEM94	transmembrane protein 94 [Source:HGNC Symbol;Acc:HGNC:28983]
ENSG00000196363	2743.4	0.576713	0.0395081	14.5974	2.91969e-48	2.24542e-46	0.00106302	2020.67	3128.17	ENSG00000196363	WDR5	WD repeat domain 5 [Source:HGNC Symbol;Acc:HGNC:12757]
ENSG00000123572	322.28	1.95077	0.133823	14.5772	3.92328e-48	3.00066e-46	0.0102794	108.333	434.333	ENSG00000123572	NRK	Nik related kinase [Source:HGNC Symbol;Acc:HGNC:25391]
ENSG00000137310	5579.29	0.840117	0.0576405	14.5751	4.04418e-48	3.07623e-46	0.00295552	3575	6635.17	ENSG00000137310	TCF19	transcription factor 19 [Source:HGNC Symbol;Acc:HGNC:11629]
ENSG00000130707	758.393	-0.887957	0.0609313	-14.5731	4.16612e-48	3.15176e-46	0.00238713	1068.33	599.5	ENSG00000130707	ASS1	argininosuccinate synthase 1 [Source:HGNC Symbol;Acc:HGNC:758]
ENSG00000182551	4224.34	0.903524	0.0620635	14.5581	5.19102e-48	3.90589e-46	0.00338021	2615.67	5070.5	ENSG00000182551	ADI1	acireductone dioxygenase 1 [Source:HGNC Symbol;Acc:HGNC:30576]
ENSG00000198952	5817.92	0.605062	0.0415914	14.5478	6.03503e-48	4.51654e-46	0.00145412	4219.67	6665.17	ENSG00000198952	SMG5	SMG5, nonsense mediated mRNA decay factor [Source:HGNC Symbol;Acc:HGNC:24644]
ENSG00000134905	1770.41	0.710451	0.0488611	14.5402	6.73704e-48	5.01496e-46	0.00158367	1215.33	2065.83	ENSG00000134905	CARS2	cysteinyl-tRNA synthetase 2, mitochondrial [Source:HGNC Symbol;Acc:HGNC:25695]
ENSG00000111445	2304.4	0.512949	0.0352818	14.5386	6.89661e-48	5.10643e-46	0.000687452	1754	2598.5	ENSG00000111445	RFC5	replication factor C subunit 5 [Source:HGNC Symbol;Acc:HGNC:9973]
ENSG00000137073	4904.82	0.596724	0.0411003	14.5187	9.22025e-48	6.79079e-46	0.00137709	3574.67	5611.5	ENSG00000137073	UBAP2	ubiquitin associated protein 2 [Source:HGNC Symbol;Acc:HGNC:14185]
ENSG00000142798	3554.47	-1.14496	0.0788815	-14.5149	9.74704e-48	7.14099e-46	0.00572735	5466.33	2575	ENSG00000142798	HSPG2	heparan sulfate proteoglycan 2 [Source:HGNC Symbol;Acc:HGNC:5273]
ENSG00000146834	2677.85	0.918781	0.0633057	14.5134	9.96637e-48	7.26345e-46	0.00334129	1642.67	3222	ENSG00000146834	MEPCE	methylphosphate capping enzyme [Source:HGNC Symbol;Acc:HGNC:20247]
ENSG00000135801	1407.06	0.678031	0.0467505	14.5032	1.15623e-47	8.38268e-46	0.00121692	982.667	1631.67	ENSG00000135801	TAF5L	TATA-box binding protein associated factor 5 like [Source:HGNC Symbol;Acc:HGNC:17304]
ENSG00000120549	1403.89	-0.696577	0.0482208	-14.4456	2.67321e-47	1.92804e-45	0.00158989	1842	1181.17	ENSG00000120549	KIAA1217	KIAA1217 [Source:HGNC Symbol;Acc:HGNC:25428]
ENSG00000185298	2022.29	0.773749	0.0536694	14.4169	4.04968e-47	2.90575e-45	0.00213066	1342	2381.83	ENSG00000185298	CCDC137	coiled-coil domain containing 137 [Source:HGNC Symbol;Acc:HGNC:33451]
ENSG00000198700	7097.67	0.448238	0.0311127	14.4069	4.68107e-47	3.34157e-45	0.000768471	5585.67	7908.33	ENSG00000198700	IPO9	importin 9 [Source:HGNC Symbol;Acc:HGNC:19425]
ENSG00000122965	2479.72	0.595124	0.0414219	14.3674	8.29246e-47	5.88934e-45	0.00116229	1808.67	2837.67	ENSG00000122965	RBM19	RNA binding motif protein 19 [Source:HGNC Symbol;Acc:HGNC:29098]
ENSG00000162337	8541.98	-1.28445	0.0895574	-14.3422	1.19296e-46	8.42947e-45	0.00760159	13788.7	5869.83	ENSG00000162337	LRP5	LDL receptor related protein 5 [Source:HGNC Symbol;Acc:HGNC:6697]
ENSG00000160072	1464.2	0.842594	0.0588292	14.3227	1.57807e-46	1.10943e-44	0.00242176	936.667	1743.5	ENSG00000160072	ATAD3B	ATPase family, AAA domain containing 3B [Source:HGNC Symbol;Acc:HGNC:24007]
ENSG00000112242	3302.43	0.523013	0.0365754	14.2996	2.20135e-46	1.53984e-44	0.000929246	2502.33	3730.33	ENSG00000112242	E2F3	E2F transcription factor 3 [Source:HGNC Symbol;Acc:HGNC:3115]
ENSG00000135862	10480.5	-0.472102	0.0330286	-14.2937	2.39479e-46	1.66677e-44	0.000959834	12592.7	9423.67	ENSG00000135862	LAMC1	laminin subunit gamma 1 [Source:HGNC Symbol;Acc:HGNC:6492]
ENSG00000213551	1933.09	0.752734	0.0526715	14.2911	2.48634e-46	1.72189e-44	0.00200467	1298	2269.67	ENSG00000213551	DNAJC9	DnaJ heat shock protein family (Hsp40) member C9 [Source:HGNC Symbol;Acc:HGNC:19123]
ENSG00000056998	267.824	-1.26	0.0882853	-14.2719	3.27334e-46	2.25569e-44	0.0041347	428	185.667	ENSG00000056998	GYG2	glycogenin 2 [Source:HGNC Symbol;Acc:HGNC:4700]
ENSG00000160208	4238.37	0.500389	0.035078	14.265	3.61344e-46	2.47779e-44	0.000906886	3246.33	4767.33	ENSG00000160208	RRP1B	ribosomal RNA processing 1B [Source:HGNC Symbol;Acc:HGNC:23818]
ENSG00000156171	1254.88	-0.811789	0.057008	-14.2399	5.17825e-46	3.5334e-44	0.00240726	1721.33	1017.33	ENSG00000156171	DRAM2	DNA damage regulated autophagy modulator 2 [Source:HGNC Symbol;Acc:HGNC:28769]
ENSG00000109805	5801.14	0.592549	0.0416418	14.2297	5.99537e-46	4.071e-44	0.00145847	4237	6631.33	ENSG00000109805	NCAPG	non-SMC condensin I complex subunit G [Source:HGNC Symbol;Acc:HGNC:24304]
ENSG00000160818	1000.55	0.935865	0.065784	14.2263	6.28987e-46	4.25024e-44	0.00278518	607.667	1208.5	ENSG00000160818	GPATCH4	G-patch domain containing 4 [Source:HGNC Symbol;Acc:HGNC:25982]
ENSG00000180198	4148.95	0.654202	0.0459934	14.2238	6.52061e-46	4.38487e-44	0.0017357	2934.33	4793.33	ENSG00000180198	RCC1	regulator of chromosome condensation 1 [Source:HGNC Symbol;Acc:HGNC:1913]
ENSG00000108106	8461.26	0.679205	0.047757	14.2221	6.68056e-46	4.47084e-44	0.00204459	5911.33	9817.83	ENSG00000108106	UBE2S	ubiquitin conjugating enzyme E2 S [Source:HGNC Symbol;Acc:HGNC:17895]
ENSG00000111206	9266.93	0.538003	0.0378509	14.2138	7.52731e-46	5.0134e-44	0.00124905	6970	10494.8	ENSG00000111206	FOXM1	forkhead box M1 [Source:HGNC Symbol;Acc:HGNC:3818]
ENSG00000093000	6828.18	0.616346	0.0434585	14.1824	1.17726e-45	7.80357e-44	0.00163677	4927.67	7833.83	ENSG00000093000	NUP50	nucleoporin 50 [Source:HGNC Symbol;Acc:HGNC:8065]
ENSG00000144580	3904.62	0.465754	0.0328861	14.1627	1.55949e-45	1.02882e-43	0.000743656	3045	4365.67	ENSG00000144580	CNOT9	CCR4-NOT transcription complex subunit 9 [Source:HGNC Symbol;Acc:HGNC:10445]
ENSG00000166068	4275.07	-0.58739	0.0414781	-14.1615	1.58667e-45	1.04182e-43	0.0014394	5384.67	3719	ENSG00000166068	SPRED1	sprouty related EVH1 domain containing 1 [Source:HGNC Symbol;Acc:HGNC:20249]
ENSG00000132646	7275.15	0.489855	0.0346134	14.1522	1.81067e-45	1.18331e-43	0.000991316	5604	8165.83	ENSG00000132646	PCNA	proliferating cell nuclear antigen [Source:HGNC Symbol;Acc:HGNC:8729]
ENSG00000182481	20093.7	0.495336	0.0350501	14.1322	2.40498e-45	1.56436e-43	0.00112247	15438.7	22572.3	ENSG00000182481	KPNA2	karyopherin subunit alpha 2 [Source:HGNC Symbol;Acc:HGNC:6395]
ENSG00000128591	25717.5	0.655352	0.0464096	14.1211	2.81741e-45	1.82411e-43	0.0020217	18179.3	29721.8	ENSG00000128591	FLNC	filamin C [Source:HGNC Symbol;Acc:HGNC:3756]
ENSG00000130066	2725.24	-0.980774	0.0694966	-14.1125	3.17879e-45	2.04855e-43	0.00431312	3964.67	2086.83	ENSG00000130066	SAT1	spermidine/spermine N1-acetyltransferase 1 [Source:HGNC Symbol;Acc:HGNC:10540]
ENSG00000133961	5857.11	-0.425766	0.0301782	-14.1084	3.37067e-45	2.1622e-43	0.000715932	6906.33	5335	ENSG00000133961	NUMB	NUMB, endocytic adaptor protein [Source:HGNC Symbol;Acc:HGNC:8060]
ENSG00000113369	926.976	-1.02965	0.073015	-14.1019	3.69922e-45	2.36207e-43	0.00415952	1376.67	698.333	ENSG00000113369	ARRDC3	arrestin domain containing 3 [Source:HGNC Symbol;Acc:HGNC:29263]
ENSG00000213024	3685.01	0.522743	0.0371487	14.0716	5.67427e-45	3.60666e-43	0.00100686	2792.33	4162.33	ENSG00000213024	NUP62	nucleoporin 62 [Source:HGNC Symbol;Acc:HGNC:8066]
ENSG00000132434	672.562	1.18365	0.0841808	14.0608	6.61345e-45	4.18451e-43	0.00453741	356.333	838.667	ENSG00000132434	LANCL2	LanC like 2 [Source:HGNC Symbol;Acc:HGNC:6509]
ENSG00000136699	4512.53	0.634055	0.0451064	14.0569	6.99123e-45	4.40353e-43	0.00168397	3228.67	5195.33	ENSG00000136699	SMPD4	sphingomyelin phosphodiesterase 4 [Source:HGNC Symbol;Acc:HGNC:32949]
ENSG00000186815	2909.87	-0.98309	0.0699972	-14.0447	8.30088e-45	5.20488e-43	0.00440105	4238.67	2230.33	ENSG00000186815	TPCN1	two pore segment channel 1 [Source:HGNC Symbol;Acc:HGNC:18182]
ENSG00000084090	7299.67	0.448866	0.0320159	14.0201	1.1744e-44	7.33079e-43	0.000827698	5742.67	8133.83	ENSG00000084090	STARD7	StAR related lipid transfer domain containing 7 [Source:HGNC Symbol;Acc:HGNC:18063]
ENSG00000104356	761.556	1.26941	0.0905994	14.0113	1.32969e-44	8.26309e-43	0.00580135	384	960	ENSG00000104356	POP1	POP1 homolog, ribonuclease P/MRP subunit [Source:HGNC Symbol;Acc:HGNC:30129]
ENSG00000021762	599.87	-1.14866	0.0820931	-13.9922	1.7399e-44	1.07642e-42	0.00498461	924.333	433.5	ENSG00000021762	OSBPL5	oxysterol binding protein like 5 [Source:HGNC Symbol;Acc:HGNC:16392]
ENSG00000100968	185.451	-2.68908	0.192288	-13.9846	1.93442e-44	1.19146e-42	0.0289335	414.667	67	ENSG00000100968	NFATC4	nuclear factor of activated T cells 4 [Source:HGNC Symbol;Acc:HGNC:7778]
ENSG00000126524	4030.18	0.451717	0.0323032	13.9837	1.96105e-44	1.20255e-42	0.000717664	3165.33	4494.17	ENSG00000126524	SBDS	SBDS, ribosome maturation factor [Source:HGNC Symbol;Acc:HGNC:19440]
ENSG00000163430	7365.72	-0.42051	0.0300866	-13.9767	2.16374e-44	1.31795e-42	0.000743127	8660.67	6719	ENSG00000163430	FSTL1	follistatin like 1 [Source:HGNC Symbol;Acc:HGNC:3972]
ENSG00000239306	3398.33	0.729726	0.0522108	13.9765	2.16817e-44	1.31795e-42	0.00224654	2310.33	3976.17	ENSG00000239306	RBM14	RNA binding motif protein 14 [Source:HGNC Symbol;Acc:HGNC:14219]
ENSG00000128050	13413.1	0.460662	0.033076	13.9274	4.31905e-44	2.61397e-42	0.000965338	10484.3	14983.8	ENSG00000128050	PAICS	phosphoribosylaminoimidazole carboxylase and phosphoribosylaminoimidazolesuccinocarboxamide synthase [Source:HGNC Symbol;Acc:HGNC:8587]
ENSG00000026950	694.908	-0.900276	0.064645	-13.9265	4.37518e-44	2.63647e-42	0.002728	984	547	ENSG00000026950	BTN3A1	butyrophilin subfamily 3 member A1 [Source:HGNC Symbol;Acc:HGNC:1138]
ENSG00000186951	1599.46	-0.762964	0.0548486	-13.9103	5.48139e-44	3.28884e-42	0.00232775	2153.67	1317.67	ENSG00000186951	PPARA	peroxisome proliferator activated receptor alpha [Source:HGNC Symbol;Acc:HGNC:9232]
ENSG00000109084	4788.88	0.775301	0.0557869	13.8975	6.55517e-44	3.91622e-42	0.00272125	3178	5637.33	ENSG00000109084	TMEM97	transmembrane protein 97 [Source:HGNC Symbol;Acc:HGNC:28106]
ENSG00000105447	2573.88	0.856419	0.0616739	13.8862	7.67642e-44	4.56649e-42	0.00313793	1634.67	3071.17	ENSG00000105447	GRWD1	glutamate rich WD repeat containing 1 [Source:HGNC Symbol;Acc:HGNC:21270]
ENSG00000146457	3530.89	0.475426	0.0342539	13.8795	8.43624e-44	4.99712e-42	0.000799574	2740.67	3954.17	ENSG00000146457	WTAP	WT1 associated protein [Source:HGNC Symbol;Acc:HGNC:16846]
ENSG00000101955	844.415	-0.791447	0.057033	-13.877	8.73379e-44	5.15146e-42	0.00206143	1150	689.833	ENSG00000101955	SRPX	sushi repeat containing protein X-linked [Source:HGNC Symbol;Acc:HGNC:11309]
ENSG00000132003	525.949	-0.972269	0.0700711	-13.8755	8.92072e-44	5.23951e-42	0.00302002	764.667	404.333	ENSG00000132003	ZSWIM4	zinc finger SWIM-type containing 4 [Source:HGNC Symbol;Acc:HGNC:25704]
ENSG00000277161	922.373	0.868459	0.0626304	13.8664	1.01207e-43	5.91936e-42	0.00231987	582	1102.5	ENSG00000277161	PIGW	phosphatidylinositol glycan anchor biosynthesis class W [Source:HGNC Symbol;Acc:HGNC:23213]
ENSG00000153246	180.835	-1.72405	0.124342	-13.8654	1.02677e-43	5.98016e-42	0.00962474	330	103.833	ENSG00000153246	PLA2R1	phospholipase A2 receptor 1 [Source:HGNC Symbol;Acc:HGNC:9042]
ENSG00000165959	1020.97	-1.25921	0.0908963	-13.8533	1.21536e-43	7.04908e-42	0.00705877	1631	708.333	ENSG00000165959	CLMN	calmin [Source:HGNC Symbol;Acc:HGNC:19972]
ENSG00000088247	15673.8	0.548356	0.0396141	13.8424	1.41325e-43	8.16286e-42	0.0014322	11725.3	17787	ENSG00000088247	KHSRP	KH-type splicing regulatory protein [Source:HGNC Symbol;Acc:HGNC:6316]
ENSG00000162614	2029.71	0.765511	0.0554074	13.816	2.03972e-43	1.17326e-41	0.00231717	1353.67	2387.67	ENSG00000162614	NEXN	nexilin F-actin binding protein [Source:HGNC Symbol;Acc:HGNC:29557]
ENSG00000100297	4299.39	0.486869	0.0353197	13.7846	3.15349e-43	1.80644e-41	0.000928382	3318	4824.17	ENSG00000100297	MCM5	minichromosome maintenance complex component 5 [Source:HGNC Symbol;Acc:HGNC:6948]
ENSG00000071054	10794.3	-0.763143	0.0553819	-13.7796	3.37931e-43	1.92787e-41	0.00286381	14544	8897.33	ENSG00000071054	MAP4K4	mitogen-activated protein kinase kinase kinase kinase 4 [Source:HGNC Symbol;Acc:HGNC:6866]
ENSG00000141101	1855.84	0.658329	0.0477812	13.778	3.45736e-43	1.96435e-41	0.00152888	1310	2144.67	ENSG00000141101	NOB1	NIN1 (RPN12) binding protein 1 homolog [Source:HGNC Symbol;Acc:HGNC:29540]
ENSG00000168393	3058.73	0.501059	0.0363883	13.7698	3.87411e-43	2.19218e-41	0.000890626	2343	3443.17	ENSG00000168393	DTYMK	deoxythymidylate kinase [Source:HGNC Symbol;Acc:HGNC:3061]
ENSG00000139112	665.93	-1.14088	0.082883	-13.765	4.14139e-43	2.33393e-41	0.00525798	1025	482.167	ENSG00000139112	GABARAPL1	GABA type A receptor associated protein like 1 [Source:HGNC Symbol;Acc:HGNC:4068]
ENSG00000031003	2408.16	1.42584	0.103629	13.7591	4.48883e-43	2.51954e-41	0.00960906	1108.33	3088.5	ENSG00000031003	FAM13B	family with sequence similarity 13 member B [Source:HGNC Symbol;Acc:HGNC:1335]
ENSG00000079999	2400.11	0.766056	0.0557109	13.7505	5.05441e-43	2.8256e-41	0.00244711	1601	2823.17	ENSG00000079999	KEAP1	kelch like ECH associated protein 1 [Source:HGNC Symbol;Acc:HGNC:23177]
ENSG00000147454	7613.11	-0.638375	0.0464818	-13.7339	6.362e-43	3.54236e-41	0.00195663	9762	6522	ENSG00000147454	SLC25A37	solute carrier family 25 member 37 [Source:HGNC Symbol;Acc:HGNC:29786]
ENSG00000119185	3551.78	0.518167	0.0377393	13.7302	6.69869e-43	3.71497e-41	0.00103786	2696.67	4006.33	ENSG00000119185	ITGB1BP1	integrin subunit beta 1 binding protein 1 [Source:HGNC Symbol;Acc:HGNC:23927]
ENSG00000188229	17364.6	0.620708	0.0452129	13.7286	6.84756e-43	3.78246e-41	0.00189417	12510	19947.8	ENSG00000188229	TUBB4B	tubulin beta 4B class IVb [Source:HGNC Symbol;Acc:HGNC:20771]
ENSG00000118655	1990.96	0.577086	0.0420367	13.7282	6.88669e-43	3.78904e-41	0.00109597	1466	2269.5	ENSG00000118655	DCLRE1B	DNA cross-link repair 1B [Source:HGNC Symbol;Acc:HGNC:17641]
ENSG00000146411	416.395	-1.12552	0.0819905	-13.7274	6.95893e-43	3.81371e-41	0.00431271	638	303	ENSG00000146411	SLC2A12	solute carrier family 2 member 12 [Source:HGNC Symbol;Acc:HGNC:18067]
ENSG00000137054	3145.24	0.736854	0.0536931	13.7234	7.34907e-43	4.01173e-41	0.00236627	2129	3682.83	ENSG00000137054	POLR1E	RNA polymerase I subunit E [Source:HGNC Symbol;Acc:HGNC:17631]
ENSG00000154310	1050.51	-0.688886	0.0502055	-13.7213	7.56686e-43	4.11448e-41	0.00156045	1376.33	885.667	ENSG00000154310	TNIK	TRAF2 and NCK interacting kinase [Source:HGNC Symbol;Acc:HGNC:30765]
ENSG00000166801	4074.93	0.478838	0.0349804	13.6887	1.18554e-42	6.42128e-41	0.000891357	3157.33	4567.67	ENSG00000166801	FAM111A	family with sequence similarity 111 member A [Source:HGNC Symbol;Acc:HGNC:24725]
ENSG00000121390	3079.82	0.829508	0.0606929	13.6673	1.59207e-42	8.58977e-41	0.00311209	1987	3659.33	ENSG00000121390	PSPC1	paraspeckle component 1 [Source:HGNC Symbol;Acc:HGNC:20320]
ENSG00000112578	2164.67	0.695822	0.0509198	13.665	1.64214e-42	8.82572e-41	0.00191354	1499	2518.33	ENSG00000112578	BYSL	bystin like [Source:HGNC Symbol;Acc:HGNC:1157]
ENSG00000050344	8604.65	-0.865028	0.0633712	-13.6502	2.01417e-42	1.07836e-40	0.00375478	12027.3	6859.5	ENSG00000050344	NFE2L3	nuclear factor, erythroid 2 like 3 [Source:HGNC Symbol;Acc:HGNC:7783]
ENSG00000120942	1291.11	0.753865	0.0552388	13.6474	2.0927e-42	1.11611e-40	0.00194173	866.333	1515.67	ENSG00000120942	UBIAD1	UbiA prenyltransferase domain containing 1 [Source:HGNC Symbol;Acc:HGNC:30791]
ENSG00000111275	1350.52	-0.597485	0.0437893	-13.6445	2.17627e-42	1.15625e-40	0.0011667	1707	1170.83	ENSG00000111275	ALDH2	aldehyde dehydrogenase 2 family member [Source:HGNC Symbol;Acc:HGNC:404]
ENSG00000138381	2291.48	0.633488	0.0464305	13.6438	2.1987e-42	1.16372e-40	0.00153784	1638.67	2638	ENSG00000138381	ASNSD1	asparagine synthetase domain containing 1 [Source:HGNC Symbol;Acc:HGNC:24910]
ENSG00000116221	3595.62	0.505487	0.0370509	13.643	2.22085e-42	1.17099e-40	0.000993832	2748	4047.67	ENSG00000116221	MRPL37	mitochondrial ribosomal protein L37 [Source:HGNC Symbol;Acc:HGNC:14034]
ENSG00000108021	6586.74	0.543956	0.0398762	13.6411	2.28025e-42	1.19778e-40	0.00134802	4933.67	7465.67	ENSG00000108021	FAM208B	family with sequence similarity 208 member B [Source:HGNC Symbol;Acc:HGNC:23484]
ENSG00000177084	4842.76	0.586088	0.0430064	13.6279	2.73178e-42	1.42956e-40	0.00152891	3544.67	5533.67	ENSG00000177084	POLE	DNA polymerase epsilon, catalytic subunit [Source:HGNC Symbol;Acc:HGNC:9177]
ENSG00000006459	611.414	-1.46351	0.107509	-13.6129	3.35707e-42	1.7502e-40	0.00961219	1039.67	391.667	ENSG00000006459	KDM7A	lysine demethylase 7A [Source:HGNC Symbol;Acc:HGNC:22224]
ENSG00000143127	339.317	-1.53736	0.113043	-13.5997	4.01809e-42	2.08701e-40	0.00956304	587.333	210.5	ENSG00000143127	ITGA10	integrin subunit alpha 10 [Source:HGNC Symbol;Acc:HGNC:6135]
ENSG00000068028	941.455	0.869493	0.0639443	13.5977	4.13427e-42	2.13937e-40	0.00250802	593	1124.5	ENSG00000068028	RASSF1	Ras association domain family member 1 [Source:HGNC Symbol;Acc:HGNC:9882]
ENSG00000053372	2663.77	0.791466	0.0582412	13.5895	4.62506e-42	2.38448e-40	0.00277241	1751.67	3148.33	ENSG00000053372	MRTO4	MRT4 homolog, ribosome maturation factor [Source:HGNC Symbol;Acc:HGNC:18477]
ENSG00000157613	248.331	-1.48788	0.109559	-13.5807	5.21573e-42	2.67908e-40	0.00784598	425.667	157.333	ENSG00000157613	CREB3L1	cAMP responsive element binding protein 3 like 1 [Source:HGNC Symbol;Acc:HGNC:18856]
ENSG00000204580	1333.11	-0.82223	0.0605746	-13.5738	5.72365e-42	2.92916e-40	0.00285267	1837.33	1077.83	ENSG00000204580	DDR1	discoidin domain receptor tyrosine kinase 1 [Source:HGNC Symbol;Acc:HGNC:2730]
ENSG00000233016	948.291	0.859334	0.0633305	13.569	6.11172e-42	3.11631e-40	0.00244929	600.667	1132.5	ENSG00000233016	SNHG7	small nucleolar RNA host gene 7 [Source:HGNC Symbol;Acc:HGNC:28254]
ENSG00000166046	690.819	-1.5525	0.114471	-13.5624	6.69448e-42	3.40099e-40	0.0112555	1207	427	ENSG00000166046	TCP11L2	t-complex 11 like 2 [Source:HGNC Symbol;Acc:HGNC:28627]
ENSG00000117318	215.806	1.59303	0.117533	13.5539	7.51376e-42	3.80333e-40	0.00468186	90	282	ENSG00000117318	ID3	inhibitor of DNA binding 3, HLH protein [Source:HGNC Symbol;Acc:HGNC:5362]
ENSG00000112029	2006.14	0.788348	0.0581928	13.5472	8.23343e-42	4.15251e-40	0.00260808	1320.33	2368	ENSG00000112029	FBXO5	F-box protein 5 [Source:HGNC Symbol;Acc:HGNC:13584]
ENSG00000181472	1869.03	0.787814	0.0581732	13.5426	8.76878e-42	4.40655e-40	0.00255868	1232	2205.17	ENSG00000181472	ZBTB2	zinc finger and BTB domain containing 2 [Source:HGNC Symbol;Acc:HGNC:20868]
ENSG00000109107	1786.04	-0.883182	0.0652363	-13.5382	9.30306e-42	4.65822e-40	0.00358819	2519.33	1415.67	ENSG00000109107	ALDOC	aldolase, fructose-bisphosphate C [Source:HGNC Symbol;Acc:HGNC:418]
ENSG00000229373	271.388	2.02372	0.149496	13.5369	9.46631e-42	4.72298e-40	0.0129148	87	368	ENSG00000229373	LINC00452	long intergenic non-protein coding RNA 452 [Source:HGNC Symbol;Acc:HGNC:42800]
ENSG00000007376	1307.65	1.00479	0.0742713	13.5286	1.05962e-41	5.26783e-40	0.00421924	765.333	1594.33	ENSG00000007376	RPUSD1	RNA pseudouridine synthase domain containing 1 [Source:HGNC Symbol;Acc:HGNC:14173]
ENSG00000168496	7326.88	0.662283	0.0489921	13.5182	1.22162e-41	6.0516e-40	0.0021377	5162	8474.83	ENSG00000168496	FEN1	flap structure-specific endonuclease 1 [Source:HGNC Symbol;Acc:HGNC:3650]
ENSG00000101146	3323.48	0.518108	0.0383526	13.5091	1.38267e-41	6.82512e-40	0.00106001	2523.67	3749.5	ENSG00000101146	RAE1	ribonucleic acid export 1 [Source:HGNC Symbol;Acc:HGNC:9828]
ENSG00000136891	3300.35	0.47132	0.0348975	13.5058	1.4444e-41	7.1046e-40	0.000819905	2566.33	3693.33	ENSG00000136891	TEX10	testis expressed 10 [Source:HGNC Symbol;Acc:HGNC:25988]
ENSG00000198231	6162.97	0.464403	0.0343923	13.5031	1.49861e-41	7.34532e-40	0.000949382	4806.33	6888.67	ENSG00000198231	DDX42	DEAD-box helicase 42 [Source:HGNC Symbol;Acc:HGNC:18676]
ENSG00000177189	5960.03	-0.477645	0.0353965	-13.4941	1.69344e-41	8.27114e-40	0.00104859	7176.33	5351	ENSG00000177189	RPS6KA3	ribosomal protein S6 kinase A3 [Source:HGNC Symbol;Acc:HGNC:10432]
ENSG00000198959	26624.1	-0.403456	0.0299208	-13.4841	1.94004e-41	9.44242e-40	0.000825118	31117.7	24401.7	ENSG00000198959	TGM2	transglutaminase 2 [Source:HGNC Symbol;Acc:HGNC:11778]
ENSG00000049239	3099.69	-0.762193	0.056533	-13.4823	1.98907e-41	9.64735e-40	0.00278048	4177	2553.17	ENSG00000049239	H6PD	hexose-6-phosphate dehydrogenase/glucose 1-dehydrogenase [Source:HGNC Symbol;Acc:HGNC:4795]
ENSG00000100413	1453.94	0.94295	0.0699452	13.4813	2.01601e-41	9.74406e-40	0.00375317	881	1755.83	ENSG00000100413	POLR3H	RNA polymerase III subunit H [Source:HGNC Symbol;Acc:HGNC:30349]
ENSG00000169174	1519.99	-1.53218	0.113722	-13.473	2.2545e-41	1.08591e-39	0.0118213	2638.33	946.333	ENSG00000169174	PCSK9	proprotein convertase subtilisin/kexin type 9 [Source:HGNC Symbol;Acc:HGNC:20001]
ENSG00000204792	592.821	1.02229	0.0759517	13.4597	2.69964e-41	1.29583e-39	0.00314081	343.333	724.667	ENSG00000204792	LINC01291	long intergenic non-protein coding RNA 1291 [Source:HGNC Symbol;Acc:HGNC:50358]
ENSG00000170633	2084.44	0.704844	0.0523707	13.4588	2.73455e-41	1.30808e-39	0.00203324	1435.67	2428.33	ENSG00000170633	RNF34	ring finger protein 34 [Source:HGNC Symbol;Acc:HGNC:17297]
ENSG00000174938	928.627	-0.957381	0.0711932	-13.4477	3.1781e-41	1.51504e-39	0.00390825	1342.67	718	ENSG00000174938	SEZ6L2	seizure related 6 homolog like 2 [Source:HGNC Symbol;Acc:HGNC:30844]
ENSG00000166508	11315.5	0.457181	0.0340036	13.4451	3.29032e-41	1.56318e-39	0.00100932	8859.67	12625.5	ENSG00000166508	MCM7	minichromosome maintenance complex component 7 [Source:HGNC Symbol;Acc:HGNC:6950]
ENSG00000129667	1958.92	-0.718673	0.0535841	-13.4121	5.13843e-41	2.43289e-39	0.00229793	2594.67	1637.33	ENSG00000129667	RHBDF2	rhomboid 5 homolog 2 [Source:HGNC Symbol;Acc:HGNC:20788]
ENSG00000198961	6753.36	-0.521742	0.0389067	-13.4101	5.27862e-41	2.49079e-39	0.00131821	8282.67	5985	ENSG00000198961	PJA2	praja ring finger ubiquitin ligase 2 [Source:HGNC Symbol;Acc:HGNC:17481]
ENSG00000130816	13505.6	0.50729	0.0378525	13.4018	5.9045e-41	2.77671e-39	0.00129013	10306.3	15211.2	ENSG00000130816	DNMT1	DNA methyltransferase 1 [Source:HGNC Symbol;Acc:HGNC:2976]
ENSG00000182944	10357.7	0.528426	0.0394375	13.3991	6.1218e-41	2.86921e-39	0.0013807	7827	11712.3	ENSG00000182944	EWSR1	EWS RNA binding protein 1 [Source:HGNC Symbol;Acc:HGNC:3508]
ENSG00000197451	13571.7	0.68612	0.0512087	13.3985	6.16853e-41	2.87282e-39	0.00242794	9443.67	15764.8	ENSG00000197451	HNRNPAB	heterogeneous nuclear ribonucleoprotein A/B [Source:HGNC Symbol;Acc:HGNC:5034]
ENSG00000105771	1880.66	0.787557	0.0587795	13.3985	6.17078e-41	2.87282e-39	0.00263113	1238.67	2218.83	ENSG00000105771	SMG9	SMG9, nonsense mediated mRNA decay factor [Source:HGNC Symbol;Acc:HGNC:25763]
ENSG00000130713	2163.16	0.655017	0.0489036	13.3941	6.54996e-41	3.03918e-39	0.00172841	1530.67	2501.5	ENSG00000130713	EXOSC2	exosome component 2 [Source:HGNC Symbol;Acc:HGNC:17097]
ENSG00000065427	8090.71	0.408639	0.0305245	13.3872	7.17966e-41	3.3203e-39	0.000755271	6493.67	8945.83	ENSG00000065427	KARS	lysyl-tRNA synthetase [Source:HGNC Symbol;Acc:HGNC:6215]
ENSG00000012822	838.239	-0.766731	0.0573943	-13.359	1.0494e-40	4.83698e-39	0.00209121	1129	689.5	ENSG00000012822	CALCOCO1	calcium binding and coiled-coil domain 1 [Source:HGNC Symbol;Acc:HGNC:29306]
ENSG00000235173	972.398	1.14457	0.0857052	13.3547	1.112e-40	5.10695e-39	0.00551376	526.333	1207.67	ENSG00000235173	HGH1	HGH1 homolog [Source:HGNC Symbol;Acc:HGNC:24161]
ENSG00000166106	1102.95	-0.964606	0.0722308	-13.3545	1.11531e-40	5.10695e-39	0.00420335	1599.67	850.333	ENSG00000166106	ADAMTS15	ADAM metallopeptidase with thrombospondin type 1 motif 15 [Source:HGNC Symbol;Acc:HGNC:16305]
ENSG00000124191	1001.09	-0.919148	0.0689193	-13.3366	1.41808e-40	6.47202e-39	0.00367101	1430	783.5	ENSG00000124191	TOX2	TOX high mobility group box family member 2 [Source:HGNC Symbol;Acc:HGNC:16095]
ENSG00000149179	649.325	-0.794881	0.0596124	-13.3341	1.46518e-40	6.66514e-39	0.00203079	884.667	529.5	ENSG00000149179	C11orf49	chromosome 11 open reading frame 49 [Source:HGNC Symbol;Acc:HGNC:28720]
ENSG00000157514	231.261	-1.32083	0.0993124	-13.2998	2.32114e-40	1.05245e-38	0.00557824	377.333	156.667	ENSG00000157514	TSC22D3	TSC22 domain family member 3 [Source:HGNC Symbol;Acc:HGNC:3051]
ENSG00000129255	2510.94	0.61288	0.0461258	13.2871	2.74861e-40	1.24223e-38	0.00156095	1816	2879.67	ENSG00000129255	MPDU1	mannose-P-dolichol utilization defect 1 [Source:HGNC Symbol;Acc:HGNC:7207]
ENSG00000234127	1936.24	0.838799	0.0631485	13.283	2.90659e-40	1.30938e-38	0.00314924	1240.67	2302.17	ENSG00000234127	TRIM26	tripartite motif containing 26 [Source:HGNC Symbol;Acc:HGNC:12962]
ENSG00000122565	6643.39	0.387015	0.029192	13.2576	4.07926e-40	1.83172e-38	0.000649473	5389	7317.17	ENSG00000122565	CBX3	chromobox 3 [Source:HGNC Symbol;Acc:HGNC:1553]
ENSG00000136379	1554.84	-0.533421	0.0402385	-13.2565	4.13947e-40	1.85278e-38	0.000964659	1915	1373.83	ENSG00000136379	ABHD17C	abhydrolase domain containing 17C [Source:HGNC Symbol;Acc:HGNC:26925]
ENSG00000087074	5618.99	0.774115	0.0584394	13.2465	4.72993e-40	2.11009e-38	0.00305228	3726	6622.33	ENSG00000087074	PPP1R15A	protein phosphatase 1 regulatory subunit 15A [Source:HGNC Symbol;Acc:HGNC:14375]
ENSG00000197153	3582.66	0.914025	0.0690027	13.2462	4.74467e-40	2.11009e-38	0.00419504	2206	4312.5	ENSG00000197153	HIST1H3J	histone cluster 1 H3 family member j [Source:HGNC Symbol;Acc:HGNC:4774]
ENSG00000112312	2649.66	0.552874	0.0417543	13.2411	5.07799e-40	2.25114e-38	0.00122673	1977	3009.33	ENSG00000112312	GMNN	geminin, DNA replication inhibitor [Source:HGNC Symbol;Acc:HGNC:17493]
ENSG00000131467	9548.42	0.614728	0.0464316	13.2394	5.1947e-40	2.29556e-38	0.00194437	6898	10957.8	ENSG00000131467	PSME3	proteasome activator subunit 3 [Source:HGNC Symbol;Acc:HGNC:9570]
ENSG00000163637	482.536	-1.34008	0.101288	-13.2304	5.86011e-40	2.58142e-38	0.00798651	792.667	324.833	ENSG00000163637	PRICKLE2	prickle planar cell polarity protein 2 [Source:HGNC Symbol;Acc:HGNC:20340]
ENSG00000148308	2516.6	0.535894	0.0405275	13.223	6.46704e-40	2.83978e-38	0.00110868	1892	2847.67	ENSG00000148308	GTF3C5	general transcription factor IIIC subunit 5 [Source:HGNC Symbol;Acc:HGNC:4668]
ENSG00000013503	1477.92	0.671282	0.0507916	13.2164	7.05528e-40	3.08835e-38	0.00164015	1036.33	1712.33	ENSG00000013503	POLR3B	RNA polymerase III subunit B [Source:HGNC Symbol;Acc:HGNC:30348]
ENSG00000029363	8503.34	0.488212	0.0369731	13.2045	8.26066e-40	3.60465e-38	0.0011768	6554.67	9543	ENSG00000029363	BCLAF1	BCL2 associated transcription factor 1 [Source:HGNC Symbol;Acc:HGNC:16863]
ENSG00000135316	11965.4	0.430987	0.0326753	13.19	1.00195e-39	4.35846e-38	0.000930553	9494	13293.3	ENSG00000135316	SYNCRIP	synaptotagmin binding cytoplasmic RNA interacting protein [Source:HGNC Symbol;Acc:HGNC:16918]
ENSG00000095539	283.001	-1.57689	0.119654	-13.1788	1.16257e-39	5.04144e-38	0.0104873	497	173.333	ENSG00000095539	SEMA4G	semaphorin 4G [Source:HGNC Symbol;Acc:HGNC:10735]
ENSG00000167118	1379.83	0.660459	0.0501888	13.1595	1.50091e-39	6.4884e-38	0.00152546	972.333	1595.33	ENSG00000167118	URM1	ubiquitin related modifier 1 [Source:HGNC Symbol;Acc:HGNC:28378]
ENSG00000112561	116.676	-1.88002	0.142936	-13.1529	1.63704e-39	7.05498e-38	0.0112897	221.667	62.5	ENSG00000112561	TFEB	transcription factor EB [Source:HGNC Symbol;Acc:HGNC:11753]
ENSG00000116455	1784.54	0.808737	0.0615025	13.1497	1.70947e-39	7.34437e-38	0.00290288	1163.33	2114.33	ENSG00000116455	WDR77	WD repeat domain 77 [Source:HGNC Symbol;Acc:HGNC:29652]
ENSG00000143493	2307.96	0.727586	0.0553575	13.1434	1.85677e-39	7.95269e-38	0.00239607	1570.67	2697.67	ENSG00000143493	INTS7	integrator complex subunit 7 [Source:HGNC Symbol;Acc:HGNC:24484]
ENSG00000100410	1557.54	0.610967	0.0465172	13.1342	2.09713e-39	8.95463e-38	0.00130058	1127	1787	ENSG00000100410	PHF5A	PHD finger protein 5A [Source:HGNC Symbol;Acc:HGNC:18000]
ENSG00000110880	21179.2	0.477886	0.0363879	13.1331	2.12683e-39	9.05365e-38	0.00121759	16411.7	23718.3	ENSG00000110880	CORO1C	coronin 1C [Source:HGNC Symbol;Acc:HGNC:2254]
ENSG00000134109	8394.99	-0.588777	0.044874	-13.1207	2.5066e-39	1.06378e-37	0.00182608	10581	7293.33	ENSG00000134109	EDEM1	ER degradation enhancing alpha-mannosidase like protein 1 [Source:HGNC Symbol;Acc:HGNC:18967]
ENSG00000071794	3714.61	-0.576451	0.0439384	-13.1195	2.54526e-39	1.0769e-37	0.00160877	4652.33	3239.83	ENSG00000071794	HLTF	helicase like transcription factor [Source:HGNC Symbol;Acc:HGNC:11099]
ENSG00000117748	1970.72	0.701481	0.0535082	13.1098	2.89454e-39	1.22097e-37	0.00211493	1358.67	2293	ENSG00000117748	RPA2	replication protein A2 [Source:HGNC Symbol;Acc:HGNC:10290]
ENSG00000138092	2681.53	0.882825	0.0675878	13.0619	5.43606e-39	2.2861e-37	0.00388791	1677.67	3208.67	ENSG00000138092	CENPO	centromere protein O [Source:HGNC Symbol;Acc:HGNC:28152]
ENSG00000006327	3367.93	0.602318	0.0461146	13.0613	5.47693e-39	2.29635e-37	0.00168433	2449	3857.17	ENSG00000006327	TNFRSF12A	TNF receptor superfamily member 12A [Source:HGNC Symbol;Acc:HGNC:18152]
ENSG00000007923	2049.26	0.57375	0.0439411	13.0573	5.77746e-39	2.41508e-37	0.00127112	1511.33	2335.33	ENSG00000007923	DNAJC11	DnaJ heat shock protein family (Hsp40) member C11 [Source:HGNC Symbol;Acc:HGNC:25570]
ENSG00000101224	6422.15	0.456636	0.0349732	13.0568	5.81525e-39	2.4236e-37	0.00099612	5033	7168	ENSG00000101224	CDC25B	cell division cycle 25B [Source:HGNC Symbol;Acc:HGNC:1726]
ENSG00000101265	1250.56	-0.79034	0.060551	-13.0525	6.15207e-39	2.55413e-37	0.0028041	1699.67	1020.83	ENSG00000101265	RASSF2	Ras association domain family member 2 [Source:HGNC Symbol;Acc:HGNC:9883]
ENSG00000137193	2135.97	-0.884664	0.0677783	-13.0523	6.16514e-39	2.55413e-37	0.00399515	3009	1690.5	ENSG00000137193	PIM1	Pim-1 proto-oncogene, serine/threonine kinase [Source:HGNC Symbol;Acc:HGNC:8986]
ENSG00000105404	1206.06	-0.660288	0.0505893	-13.0519	6.19479e-39	2.5588e-37	0.00170678	1562.33	1025.33	ENSG00000105404	RABAC1	Rab acceptor 1 [Source:HGNC Symbol;Acc:HGNC:9794]
ENSG00000146223	17275.3	0.57112	0.0437845	13.0439	6.88637e-39	2.83604e-37	0.00177288	12764	19680.7	ENSG00000146223	RPL7L1	ribosomal protein L7 like 1 [Source:HGNC Symbol;Acc:HGNC:21370]
ENSG00000186480	9741.24	-0.656938	0.0504133	-13.031	8.14897e-39	3.34613e-37	0.00234893	12601.7	8288.67	ENSG00000186480	INSIG1	insulin induced gene 1 [Source:HGNC Symbol;Acc:HGNC:6083]
ENSG00000086062	6420.03	-0.617621	0.0474228	-13.0237	8.96859e-39	3.67184e-37	0.00201907	8184.67	5533.17	ENSG00000086062	B4GALT1	beta-1,4-galactosyltransferase 1 [Source:HGNC Symbol;Acc:HGNC:924]
ENSG00000255248	3116.03	-1.20937	0.0930046	-13.0034	1.17085e-38	4.77956e-37	0.00802393	4894.33	2203.83	ENSG00000255248	MIR100HG	mir-100-let-7a-2-mir-125b-1 cluster host gene [Source:HGNC Symbol;Acc:HGNC:39522]
ENSG00000160271	1131.76	-0.833937	0.0641507	-12.9997	1.22886e-38	5.00169e-37	0.0031619	1566.33	911.167	ENSG00000160271	RALGDS	ral guanine nucleotide dissociation stimulator [Source:HGNC Symbol;Acc:HGNC:9842]
ENSG00000162607	5767.62	0.635124	0.0488606	12.9987	1.24474e-38	5.05155e-37	0.00208184	4122.67	6640.67	ENSG00000162607	USP1	ubiquitin specific peptidase 1 [Source:HGNC Symbol;Acc:HGNC:12607]
ENSG00000140450	219.961	-1.38858	0.106911	-12.9882	1.4274e-38	5.77598e-37	0.00686114	366	145.167	ENSG00000140450	ARRDC4	arrestin domain containing 4 [Source:HGNC Symbol;Acc:HGNC:28087]
ENSG00000138231	779.795	0.824708	0.0635848	12.9702	1.80554e-38	7.28498e-37	0.00219997	503.667	925.667	ENSG00000138231	DBR1	debranching RNA lariats 1 [Source:HGNC Symbol;Acc:HGNC:15594]
ENSG00000106665	2632.9	-0.693891	0.0535125	-12.9669	1.88507e-38	7.58386e-37	0.00240788	3454.33	2215.67	ENSG00000106665	CLIP2	CAP-Gly domain containing linker protein 2 [Source:HGNC Symbol;Acc:HGNC:2586]
ENSG00000105223	2910.12	-0.785711	0.0606057	-12.9643	1.94992e-38	7.82217e-37	0.00322042	3960	2379.83	ENSG00000105223	PLD3	phospholipase D family member 3 [Source:HGNC Symbol;Acc:HGNC:17158]
ENSG00000084764	455.223	-1.04093	0.0804234	-12.9431	2.56884e-38	1.02754e-36	0.0042534	676.667	341.667	ENSG00000084764	MAPRE3	microtubule associated protein RP/EB family member 3 [Source:HGNC Symbol;Acc:HGNC:6892]
ENSG00000164050	240.669	-1.29012	0.0996793	-12.9427	2.58498e-38	1.03103e-36	0.00580566	387.667	164.833	ENSG00000164050	PLXNB1	plexin B1 [Source:HGNC Symbol;Acc:HGNC:9103]
ENSG00000136875	2948.69	0.498084	0.038498	12.9379	2.74986e-38	1.09366e-36	0.00102852	2261.67	3315	ENSG00000136875	PRPF4	pre-mRNA processing factor 4 [Source:HGNC Symbol;Acc:HGNC:17349]
ENSG00000082458	998.44	-0.837723	0.0647785	-12.9321	2.96532e-38	1.17599e-36	0.00313398	1383.33	802.667	ENSG00000082458	DLG3	discs large MAGUK scaffold protein 3 [Source:HGNC Symbol;Acc:HGNC:2902]
ENSG00000143368	3218.16	0.683556	0.0528729	12.9283	3.11703e-38	1.23264e-36	0.00229925	2244.33	3737	ENSG00000143368	SF3B4	splicing factor 3b subunit 4 [Source:HGNC Symbol;Acc:HGNC:10771]
ENSG00000055044	3915.82	0.688639	0.0532856	12.9235	3.31523e-38	1.30731e-36	0.00240968	2720.67	4552.5	ENSG00000055044	NOP58	NOP58 ribonucleoprotein [Source:HGNC Symbol;Acc:HGNC:29926]
ENSG00000130749	3643.71	0.627065	0.0485483	12.9163	3.64169e-38	1.43199e-36	0.00192993	2617.67	4190.17	ENSG00000130749	ZC3H4	zinc finger CCCH-type containing 4 [Source:HGNC Symbol;Acc:HGNC:17808]
ENSG00000196262	25377.5	0.421086	0.0326026	12.9157	3.66984e-38	1.43899e-36	0.000976545	20251	28132.3	ENSG00000196262	PPIA	peptidylprolyl isomerase A [Source:HGNC Symbol;Acc:HGNC:9253]
ENSG00000160392	816.661	0.838528	0.0650379	12.8929	4.93401e-38	1.92925e-36	0.0024471	524	971.833	ENSG00000160392	C19orf47	chromosome 19 open reading frame 47 [Source:HGNC Symbol;Acc:HGNC:26723]
ENSG00000172115	4144.56	0.568762	0.0441151	12.8927	4.94956e-38	1.92991e-36	0.00158167	3067.67	4719.83	ENSG00000172115	CYCS	cytochrome c, somatic [Source:HGNC Symbol;Acc:HGNC:19986]
ENSG00000135968	2380.91	-0.485402	0.0376717	-12.885	5.46429e-38	2.12466e-36	0.000975223	2874	2132.33	ENSG00000135968	GCC2	GRIP and coiled-coil domain containing 2 [Source:HGNC Symbol;Acc:HGNC:23218]
ENSG00000161638	5901.27	-0.762941	0.0592291	-12.8812	5.74505e-38	2.22761e-36	0.00321832	7950.67	4863.83	ENSG00000161638	ITGA5	integrin subunit alpha 5 [Source:HGNC Symbol;Acc:HGNC:6141]
ENSG00000158292	391.932	-1.19417	0.0927716	-12.8721	6.46078e-38	2.49817e-36	0.00598488	614.667	278.5	ENSG00000158292	GPR153	G protein-coupled receptor 153 [Source:HGNC Symbol;Acc:HGNC:23618]
ENSG00000197324	15965.3	-0.61677	0.0479342	-12.867	6.90299e-38	2.66176e-36	0.00215078	20358.7	13761.8	ENSG00000197324	LRP10	LDL receptor related protein 10 [Source:HGNC Symbol;Acc:HGNC:14553]
ENSG00000119862	775.464	-0.782541	0.0608386	-12.8626	7.31109e-38	2.81134e-36	0.0023969	1051.67	634.833	ENSG00000119862	LGALSL	galectin like [Source:HGNC Symbol;Acc:HGNC:25012]
ENSG00000167258	10858.7	0.519256	0.0403833	12.8582	7.737e-38	2.96692e-36	0.00145883	8237.67	12255.5	ENSG00000167258	CDK12	cyclin dependent kinase 12 [Source:HGNC Symbol;Acc:HGNC:24224]
ENSG00000177302	4231.6	0.70283	0.0547085	12.8468	8.96244e-38	3.4274e-36	0.00257954	2918	4926.67	ENSG00000177302	TOP3A	DNA topoisomerase III alpha [Source:HGNC Symbol;Acc:HGNC:11992]
ENSG00000172336	1355.03	0.769689	0.0599305	12.843	9.41303e-38	3.58985e-36	0.00250199	902.333	1595	ENSG00000172336	POP7	POP7 homolog, ribonuclease P/MRP subunit [Source:HGNC Symbol;Acc:HGNC:19949]
ENSG00000108424	42183.6	0.373053	0.0291018	12.8189	1.28468e-37	4.886e-36	0.00078724	34466.7	46324.8	ENSG00000108424	KPNB1	karyopherin subunit beta 1 [Source:HGNC Symbol;Acc:HGNC:6400]
ENSG00000114423	740.98	-1.04532	0.0815546	-12.8174	1.31036e-37	4.9701e-36	0.00518577	1103.33	555	ENSG00000114423	CBLB	Cbl proto-oncogene B [Source:HGNC Symbol;Acc:HGNC:1542]
ENSG00000182568	284.987	-1.15161	0.0898812	-12.8126	1.39374e-37	5.26131e-36	0.0046249	440.333	205.667	ENSG00000182568	SATB1	SATB homeobox 1 [Source:HGNC Symbol;Acc:HGNC:10541]
ENSG00000117395	4593.08	0.581431	0.0453798	12.8126	1.3947e-37	5.26131e-36	0.00171742	3373.33	5243.67	ENSG00000117395	EBNA1BP2	EBNA1 binding protein 2 [Source:HGNC Symbol;Acc:HGNC:15531]
ENSG00000163257	2405.47	1.0542	0.0823247	12.8054	1.5292e-37	5.75311e-36	0.00591202	1370.67	2950.5	ENSG00000163257	DCAF16	DDB1 and CUL4 associated factor 16 [Source:HGNC Symbol;Acc:HGNC:25987]
ENSG00000265354	3760.78	0.555637	0.0434105	12.7996	1.64779e-37	6.18253e-36	0.00149443	2801	4272.83	ENSG00000265354	TIMM23	translocase of inner mitochondrial membrane 23 [Source:HGNC Symbol;Acc:HGNC:17312]
ENSG00000149636	2830.8	0.499812	0.0390519	12.7987	1.66823e-37	6.24242e-36	0.00105306	2167.67	3184	ENSG00000149636	DSN1	DSN1 homolog, MIS12 kinetochore complex component [Source:HGNC Symbol;Acc:HGNC:16165]
ENSG00000090621	8247.2	0.434784	0.0339961	12.7892	1.883e-37	7.02718e-36	0.000972001	6531.67	9168.5	ENSG00000090621	PABPC4	poly(A) binding protein cytoplasmic 4 [Source:HGNC Symbol;Acc:HGNC:8557]
ENSG00000146416	1364.61	-0.843329	0.0659443	-12.7885	1.90091e-37	7.07506e-36	0.00352158	1893.33	1095.67	ENSG00000146416	AIG1	androgen induced 1 [Source:HGNC Symbol;Acc:HGNC:21607]
ENSG00000128342	2609.95	-0.896598	0.0701285	-12.7851	1.98671e-37	7.37468e-36	0.00438284	3691.33	2058.5	ENSG00000128342	LIF	LIF, interleukin 6 family cytokine [Source:HGNC Symbol;Acc:HGNC:6596]
ENSG00000118263	526.555	-0.851357	0.0666645	-12.7708	2.38784e-37	8.84009e-36	0.00256859	732.333	421.667	ENSG00000118263	KLF7	Kruppel like factor 7 [Source:HGNC Symbol;Acc:HGNC:6350]
ENSG00000119772	1384.85	-0.680816	0.0533957	-12.7504	3.10203e-37	1.14537e-35	0.00208546	1806.33	1170.67	ENSG00000119772	DNMT3A	DNA methyltransferase 3 alpha [Source:HGNC Symbol;Acc:HGNC:2978]
ENSG00000138443	4319.29	-0.58532	0.045948	-12.7388	3.60107e-37	1.32611e-35	0.00181702	5426	3759.17	ENSG00000138443	ABI2	abl interactor 2 [Source:HGNC Symbol;Acc:HGNC:24011]
ENSG00000119711	1317.69	-0.627287	0.0492487	-12.7371	3.67592e-37	1.3501e-35	0.00163991	1685.67	1132	ENSG00000119711	ALDH6A1	aldehyde dehydrogenase 6 family member A1 [Source:HGNC Symbol;Acc:HGNC:7179]
ENSG00000140043	633.262	-0.874195	0.0686425	-12.7355	3.75551e-37	1.3757e-35	0.00311382	887.667	503.667	ENSG00000140043	PTGR2	prostaglandin reductase 2 [Source:HGNC Symbol;Acc:HGNC:20149]
ENSG00000198133	232.151	-1.38344	0.108645	-12.7336	3.84502e-37	1.40479e-35	0.0074386	386	153.5	ENSG00000198133	TMEM229B	transmembrane protein 229B [Source:HGNC Symbol;Acc:HGNC:20130]
ENSG00000011638	500.151	-1.03955	0.081769	-12.7133	4.98868e-37	1.81786e-35	0.00463967	743	376	ENSG00000011638	TMEM159	transmembrane protein 159 [Source:HGNC Symbol;Acc:HGNC:30136]
ENSG00000108370	778.575	-0.731606	0.0575957	-12.7024	5.73075e-37	2.08282e-35	0.00202854	1035.67	647.5	ENSG00000108370	RGS9	regulator of G protein signaling 9 [Source:HGNC Symbol;Acc:HGNC:10004]
ENSG00000175155	279.148	-1.30667	0.103086	-12.6754	8.08946e-37	2.93243e-35	0.0069815	452.333	189.833	ENSG00000175155	YPEL2	yippee like 2 [Source:HGNC Symbol;Acc:HGNC:18326]
ENSG00000074410	1564.97	-1.00081	0.0789889	-12.6702	8.64687e-37	3.12635e-35	0.00542466	2298	1192.33	ENSG00000074410	CA12	carbonic anhydrase 12 [Source:HGNC Symbol;Acc:HGNC:1371]
ENSG00000126858	990.114	-0.856101	0.0676235	-12.6598	9.87216e-37	3.56012e-35	0.00348899	1378.67	791.333	ENSG00000126858	RHOT1	ras homolog family member T1 [Source:HGNC Symbol;Acc:HGNC:21168]
ENSG00000146918	7952.55	0.391946	0.0309708	12.6553	1.04522e-36	3.75954e-35	0.000779965	6436.33	8765.17	ENSG00000146918	NCAPG2	non-SMC condensin II complex subunit G2 [Source:HGNC Symbol;Acc:HGNC:21904]
ENSG00000170915	536.427	-1.27655	0.100987	-12.6407	1.25855e-36	4.51521e-35	0.00812237	861	369.5	ENSG00000170915	PAQR8	progestin and adipoQ receptor family member 8 [Source:HGNC Symbol;Acc:HGNC:15708]
ENSG00000111737	4430.31	0.686186	0.0543022	12.6364	1.32947e-36	4.75739e-35	0.00255203	3084.67	5145.17	ENSG00000111737	RAB35	RAB35, member RAS oncogene family [Source:HGNC Symbol;Acc:HGNC:9774]
ENSG00000170779	1898.36	0.560058	0.0443794	12.6198	1.6429e-36	5.86388e-35	0.00126491	1409.67	2158.83	ENSG00000170779	CDCA4	cell division cycle associated 4 [Source:HGNC Symbol;Acc:HGNC:14625]
ENSG00000049323	2367.46	-1.17355	0.0930001	-12.6188	1.66369e-36	5.92291e-35	0.00793268	3694.33	1694.67	ENSG00000049323	LTBP1	latent transforming growth factor beta binding protein 1 [Source:HGNC Symbol;Acc:HGNC:6714]
ENSG00000187522	1955.36	0.507003	0.0401859	12.6164	1.71413e-36	6.08691e-35	0.000953439	1492.33	2202.67	ENSG00000187522	HSPA14	heat shock protein family A (Hsp70) member 14 [Source:HGNC Symbol;Acc:HGNC:29526]
ENSG00000163866	1316.5	0.692437	0.0548863	12.6158	1.72693e-36	6.11674e-35	0.00194574	913	1530.67	ENSG00000163866	SMIM12	small integral membrane protein 12 [Source:HGNC Symbol;Acc:HGNC:25154]
ENSG00000275395	66.5863	-3.06073	0.242996	-12.5958	2.22693e-36	7.86771e-35	0.0355135	158	19.6667	ENSG00000275395	FCGBP	Fc fragment of IgG binding protein [Source:HGNC Symbol;Acc:HGNC:13572]
ENSG00000168672	1218.33	-1.79178	0.142256	-12.5954	2.23735e-36	7.88452e-35	0.0186599	2263.67	679.667	ENSG00000168672	FAM84B	family with sequence similarity 84 member B [Source:HGNC Symbol;Acc:HGNC:24166]
ENSG00000141404	478.558	-1.02121	0.0810856	-12.5943	2.2707e-36	7.98187e-35	0.00445202	706.667	361.833	ENSG00000141404	GNAL	G protein subunit alpha L [Source:HGNC Symbol;Acc:HGNC:4388]
ENSG00000064309	1445.78	-0.877742	0.0697594	-12.5824	2.63799e-36	9.24959e-35	0.00405681	2033	1147.83	ENSG00000064309	CDON	cell adhesion associated, oncogene regulated [Source:HGNC Symbol;Acc:HGNC:17104]
ENSG00000119669	5587.89	-0.7311	0.0581309	-12.5768	2.83288e-36	9.90798e-35	0.00308557	7450.67	4648.67	ENSG00000119669	IRF2BPL	interferon regulatory factor 2 binding protein like [Source:HGNC Symbol;Acc:HGNC:14282]
ENSG00000164548	2287.1	0.542876	0.0431701	12.5753	2.88741e-36	1.00734e-34	0.00127298	1715.33	2593.5	ENSG00000164548	TRA2A	transformer 2 alpha homolog [Source:HGNC Symbol;Acc:HGNC:16645]
ENSG00000156671	3545.54	-0.445313	0.0354224	-12.5715	3.02901e-36	1.05409e-34	0.000943435	4211.33	3211.83	ENSG00000156671	SAMD8	sterile alpha motif domain containing 8 [Source:HGNC Symbol;Acc:HGNC:26320]
ENSG00000148297	1238.61	0.660838	0.0525989	12.5637	3.3422e-36	1.16019e-34	0.00166139	872.667	1432.5	ENSG00000148297	MED22	mediator complex subunit 22 [Source:HGNC Symbol;Acc:HGNC:11477]
ENSG00000108654	22472.5	0.460769	0.0366793	12.5621	3.41129e-36	1.18122e-34	0.00124149	17553.7	25101.2	ENSG00000108654	DDX5	DEAD-box helicase 5 [Source:HGNC Symbol;Acc:HGNC:2746]
ENSG00000125779	2913.65	0.452578	0.0360804	12.5436	4.30858e-36	1.48822e-34	0.00085655	2287.33	3250	ENSG00000125779	PANK2	pantothenate kinase 2 [Source:HGNC Symbol;Acc:HGNC:15894]
ENSG00000187605	1972.16	0.617069	0.0492114	12.5392	4.55856e-36	1.57067e-34	0.00171074	1422.33	2266.33	ENSG00000187605	TET3	tet methylcytosine dioxygenase 3 [Source:HGNC Symbol;Acc:HGNC:28313]
ENSG00000130529	244.051	-1.51847	0.121135	-12.5354	4.77887e-36	1.64251e-34	0.0103349	421.333	153	ENSG00000130529	TRPM4	transient receptor potential cation channel subfamily M member 4 [Source:HGNC Symbol;Acc:HGNC:17993]
ENSG00000070540	1591.91	-0.979124	0.0781314	-12.5318	5.00425e-36	1.71574e-34	0.0053047	2317.67	1221.33	ENSG00000070540	WIPI1	WD repeat domain, phosphoinositide interacting 1 [Source:HGNC Symbol;Acc:HGNC:25471]
ENSG00000163638	369.178	-2.05856	0.164318	-12.5279	5.25211e-36	1.7963e-34	0.0232038	730.667	182.833	ENSG00000163638	ADAMTS9	ADAM metallopeptidase with thrombospondin type 1 motif 9 [Source:HGNC Symbol;Acc:HGNC:13202]
ENSG00000179163	815.749	-0.916557	0.0732371	-12.5149	6.18552e-36	2.11036e-34	0.00405786	1163.33	639.333	ENSG00000179163	FUCA1	alpha-L-fucosidase 1 [Source:HGNC Symbol;Acc:HGNC:4006]
ENSG00000136271	2852.66	0.512767	0.0410212	12.5	7.46142e-36	2.53944e-34	0.00120598	2170.67	3217.17	ENSG00000136271	DDX56	DEAD-box helicase 56 [Source:HGNC Symbol;Acc:HGNC:18193]
ENSG00000074181	69.5435	-2.28686	0.18302	-12.4952	7.93347e-36	2.69351e-34	0.0167513	144.667	30.8333	ENSG00000074181	NOTCH3	notch 3 [Source:HGNC Symbol;Acc:HGNC:7883]
ENSG00000179913	449.161	-0.880618	0.0704933	-12.4922	8.23215e-36	2.78812e-34	0.00278161	631.333	355.833	ENSG00000179913	B3GNT3	UDP-GlcNAc:betaGal beta-1,3-N-acetylglucosaminyltransferase 3 [Source:HGNC Symbol;Acc:HGNC:13528]
ENSG00000095637	421.146	-0.935532	0.0750916	-12.4585	1.25654e-35	4.24539e-34	0.00329532	603.333	327.5	ENSG00000095637	SORBS1	sorbin and SH3 domain containing 1 [Source:HGNC Symbol;Acc:HGNC:14565]
ENSG00000088367	3460.4	-0.496663	0.0398715	-12.4566	1.28735e-35	4.33896e-34	0.00126069	4200.67	3089	ENSG00000088367	EPB41L1	erythrocyte membrane protein band 4.1 like 1 [Source:HGNC Symbol;Acc:HGNC:3378]
ENSG00000114302	8726.66	0.353872	0.0284243	12.4496	1.40524e-35	4.72486e-34	0.000648728	7199.67	9548.17	ENSG00000114302	PRKAR2A	protein kinase cAMP-dependent type II regulatory subunit alpha [Source:HGNC Symbol;Acc:HGNC:9391]
ENSG00000102452	531.227	-0.985503	0.0792041	-12.4426	1.53467e-35	5.1476e-34	0.0043469	775	406.667	ENSG00000102452	NALCN	sodium leak channel, non-selective [Source:HGNC Symbol;Acc:HGNC:19082]
ENSG00000172731	6659.74	0.582044	0.046802	12.4363	1.65976e-35	5.55382e-34	0.00192446	4888.67	7599.5	ENSG00000172731	LRRC20	leucine rich repeat containing 20 [Source:HGNC Symbol;Acc:HGNC:23421]
ENSG00000087087	6497.35	0.738323	0.0593867	12.4325	1.74188e-35	5.81461e-34	0.00319323	4397.67	7610.83	ENSG00000087087	SRRT	serrate, RNA effector molecule [Source:HGNC Symbol;Acc:HGNC:24101]
ENSG00000165029	503.437	-1.40769	0.113287	-12.4258	1.89334e-35	6.30511e-34	0.0105275	844.333	329.333	ENSG00000165029	ABCA1	ATP binding cassette subfamily A member 1 [Source:HGNC Symbol;Acc:HGNC:29]
ENSG00000167110	2601.82	-0.490521	0.0395025	-12.4175	2.10122e-35	6.98066e-34	0.00114419	3148.33	2326.33	ENSG00000167110	GOLGA2	golgin A2 [Source:HGNC Symbol;Acc:HGNC:4425]
ENSG00000247077	3027.49	0.636226	0.0512538	12.4133	2.21443e-35	7.33927e-34	0.0021199	2162	3488.67	ENSG00000247077	PGAM5	PGAM family member 5, mitochondrial serine/threonine protein phosphatase [Source:HGNC Symbol;Acc:HGNC:28763]
ENSG00000176485	2617.37	-0.588547	0.0474693	-12.3985	2.66344e-35	8.80644e-34	0.0018161	3298	2274.5	ENSG00000176485	PLA2G16	phospholipase A2 group XVI [Source:HGNC Symbol;Acc:HGNC:17825]
ENSG00000106263	12646.9	0.577728	0.046603	12.3968	2.72017e-35	8.9727e-34	0.00199212	9313.67	14423.3	ENSG00000106263	EIF3B	eukaryotic translation initiation factor 3 subunit B [Source:HGNC Symbol;Acc:HGNC:3280]
ENSG00000120802	14602.1	0.409411	0.0330471	12.3887	3.00909e-35	9.90224e-34	0.000971796	11716	16149.2	ENSG00000120802	TMPO	thymopoietin [Source:HGNC Symbol;Acc:HGNC:11875]
ENSG00000173801	1261.58	-1.01254	0.0817567	-12.3847	3.1613e-35	1.03786e-33	0.00571489	1861.67	955	ENSG00000173801	JUP	junction plakoglobin [Source:HGNC Symbol;Acc:HGNC:6207]
ENSG00000104131	3844.34	0.468939	0.0378765	12.3807	3.32349e-35	1.08854e-33	0.00107802	2994.33	4300.67	ENSG00000104131	EIF3J	eukaryotic translation initiation factor 3 subunit J [Source:HGNC Symbol;Acc:HGNC:3270]
ENSG00000087191	5817.48	0.507359	0.0410213	12.3682	3.88472e-35	1.26937e-33	0.00141577	4442.33	6550.83	ENSG00000087191	PSMC5	proteasome 26S subunit, ATPase 5 [Source:HGNC Symbol;Acc:HGNC:9552]
ENSG00000138095	14788.3	0.321294	0.0259957	12.3595	4.3283e-35	1.411e-33	0.00057479	12399.7	16082.8	ENSG00000138095	LRPPRC	leucine rich pentatricopeptide repeat containing [Source:HGNC Symbol;Acc:HGNC:15714]
ENSG00000197355	1240.04	0.918284	0.0743742	12.3468	5.06851e-35	1.64845e-33	0.00421496	760.667	1492.17	ENSG00000197355	UAP1L1	UDP-N-acetylglucosamine pyrophosphorylase 1 like 1 [Source:HGNC Symbol;Acc:HGNC:28082]
ENSG00000179041	921.138	0.813494	0.0659299	12.3388	5.59988e-35	1.81702e-33	0.00275678	599	1092.33	ENSG00000179041	RRS1	ribosome biogenesis regulator homolog [Source:HGNC Symbol;Acc:HGNC:17083]
ENSG00000173482	6131.61	-0.576347	0.0467463	-12.3293	6.30242e-35	2.04022e-33	0.00195054	7670.67	5349.33	ENSG00000173482	PTPRM	protein tyrosine phosphatase, receptor type M [Source:HGNC Symbol;Acc:HGNC:9675]
ENSG00000163832	1645.21	0.618663	0.0502254	12.3177	7.27231e-35	2.34874e-33	0.00168454	1184.67	1888.67	ENSG00000163832	ELP6	elongator acetyltransferase complex subunit 6 [Source:HGNC Symbol;Acc:HGNC:25976]
ENSG00000169908	8658.67	-0.707991	0.0574923	-12.3145	7.56484e-35	2.43756e-33	0.00307172	11415.7	7252.5	ENSG00000169908	TM4SF1	transmembrane 4 L six family member 1 [Source:HGNC Symbol;Acc:HGNC:11853]
ENSG00000132953	3233.5	0.530028	0.0430514	12.3115	7.85489e-35	2.52517e-33	0.00141625	2439.33	3658.17	ENSG00000132953	XPO4	exportin 4 [Source:HGNC Symbol;Acc:HGNC:17796]
ENSG00000155265	806.192	-1.06013	0.0862112	-12.2968	9.41854e-35	3.02088e-33	0.00603405	1209.33	601	ENSG00000155265	GOLGA7B	golgin A7 family member B [Source:HGNC Symbol;Acc:HGNC:31668]
ENSG00000139645	7048.63	0.504315	0.0410655	12.2807	1.14953e-34	3.6785e-33	0.00145457	5391.33	7936.17	ENSG00000139645	ANKRD52	ankyrin repeat domain 52 [Source:HGNC Symbol;Acc:HGNC:26614]
ENSG00000165507	278.186	-1.79108	0.145895	-12.2765	1.21102e-34	3.86638e-33	0.0170138	518.667	155.333	ENSG00000165507	DEPP1	DEPP1, autophagy regulator [Source:HGNC Symbol;Acc:HGNC:23355]
ENSG00000115758	9176.1	0.656414	0.0534702	12.2763	1.21483e-34	3.86967e-33	0.00261289	6482.67	10609.8	ENSG00000115758	ODC1	ornithine decarboxylase 1 [Source:HGNC Symbol;Acc:HGNC:8109]
ENSG00000182446	9593.74	0.376346	0.0306696	12.271	1.2972e-34	4.12262e-33	0.000786947	7828.67	10544.5	ENSG00000182446	NPLOC4	NPL4 homolog, ubiquitin recognition factor [Source:HGNC Symbol;Acc:HGNC:18261]
ENSG00000145833	8000.8	0.474552	0.0387375	12.2505	1.67019e-34	5.29591e-33	0.00129723	6206.67	8959.17	ENSG00000145833	DDX46	DEAD-box helicase 46 [Source:HGNC Symbol;Acc:HGNC:18681]
ENSG00000133056	557.296	-1.01386	0.082799	-12.2449	1.78987e-34	5.66249e-33	0.00498542	823	422	ENSG00000133056	PIK3C2B	phosphatidylinositol-4-phosphate 3-kinase catalytic subunit type 2 beta [Source:HGNC Symbol;Acc:HGNC:8972]
ENSG00000129351	19414.2	0.318807	0.0260566	12.2351	2.01778e-34	6.36904e-33	0.000595644	16296.3	21098.3	ENSG00000129351	ILF3	interleukin enhancer binding factor 3 [Source:HGNC Symbol;Acc:HGNC:6038]
ENSG00000074695	5706.02	-0.462707	0.0378197	-12.2346	2.0316e-34	6.39818e-33	0.00121182	6829.33	5143.33	ENSG00000074695	LMAN1	lectin, mannose binding 1 [Source:HGNC Symbol;Acc:HGNC:6631]
ENSG00000185504	1668.86	0.585336	0.0478547	12.2315	2.10929e-34	6.62782e-33	0.00148035	1224.33	1906.33	ENSG00000185504	FAAP100	FA core complex associated protein 100 [Source:HGNC Symbol;Acc:HGNC:26171]
ENSG00000188707	341.832	1.60094	0.131049	12.2163	2.54276e-34	7.97189e-33	0.0110532	142	446.167	ENSG00000188707	ZBED6CL	ZBED6 C-terminal like [Source:HGNC Symbol;Acc:HGNC:21720]
ENSG00000163346	692.253	-1.05345	0.086255	-12.2131	2.64454e-34	8.27235e-33	0.00585916	1036	517.5	ENSG00000163346	PBXIP1	PBX homeobox interacting protein 1 [Source:HGNC Symbol;Acc:HGNC:21199]
ENSG00000107551	535.931	-0.894391	0.0732396	-12.2119	2.68702e-34	8.38639e-33	0.00348464	757.333	422.833	ENSG00000107551	RASSF4	Ras association domain family member 4 [Source:HGNC Symbol;Acc:HGNC:20793]
ENSG00000175274	990.894	-1.6134	0.132433	-12.1827	3.84349e-34	1.1969e-32	0.0159139	1756.33	597	ENSG00000175274	TP53I11	tumor protein p53 inducible protein 11 [Source:HGNC Symbol;Acc:HGNC:16842]
ENSG00000144810	7930.61	-0.815925	0.0670405	-12.1706	4.45639e-34	1.38466e-32	0.00420549	10866	6423.83	ENSG00000144810	COL8A1	collagen type VIII alpha 1 chain [Source:HGNC Symbol;Acc:HGNC:2215]
ENSG00000135678	187.297	-1.37326	0.112837	-12.1703	4.47634e-34	1.3852e-32	0.00739686	309.667	124.167	ENSG00000135678	CPM	carboxypeptidase M [Source:HGNC Symbol;Acc:HGNC:2311]
ENSG00000132510	931.939	-0.941821	0.0773873	-12.1702	4.47802e-34	1.3852e-32	0.00479567	1339.33	724.5	ENSG00000132510	KDM6B	lysine demethylase 6B [Source:HGNC Symbol;Acc:HGNC:29012]
ENSG00000125843	828.642	0.784662	0.0644812	12.1689	4.5542e-34	1.40564e-32	0.00243401	547	977.333	ENSG00000125843	AP5S1	adaptor related protein complex 5 subunit sigma 1 [Source:HGNC Symbol;Acc:HGNC:15875]
ENSG00000187720	2860.51	-1.50543	0.123724	-12.1676	4.62317e-34	1.42377e-32	0.0143884	4918.33	1802.5	ENSG00000187720	THSD4	thrombospondin type 1 domain containing 4 [Source:HGNC Symbol;Acc:HGNC:25835]
ENSG00000169891	1394.83	-0.602877	0.0495647	-12.1634	4.86663e-34	1.49544e-32	0.00170659	1767.33	1207.67	ENSG00000169891	REPS2	RALBP1 associated Eps domain containing 2 [Source:HGNC Symbol;Acc:HGNC:9963]
ENSG00000141425	2026.59	-0.554439	0.045619	-12.1537	5.48307e-34	1.67998e-32	0.00154719	2517.67	1779.83	ENSG00000141425	RPRD1A	regulation of nuclear pre-mRNA domain containing 1A [Source:HGNC Symbol;Acc:HGNC:25560]
ENSG00000172009	3110.8	0.583578	0.048017	12.1536	5.4913e-34	1.67998e-32	0.00182929	2283.33	3552.33	ENSG00000172009	THOP1	thimet oligopeptidase 1 [Source:HGNC Symbol;Acc:HGNC:11793]
ENSG00000130755	689.069	-1.26862	0.104464	-12.1441	6.16198e-34	1.88103e-32	0.009181	1104.33	476.333	ENSG00000130755	GMFG	glia maturation factor gamma [Source:HGNC Symbol;Acc:HGNC:4374]
ENSG00000174371	1854.75	0.829572	0.068333	12.1401	6.47184e-34	1.97129e-32	0.00377686	1194.67	2202.5	ENSG00000174371	EXO1	exonuclease 1 [Source:HGNC Symbol;Acc:HGNC:3511]
ENSG00000148154	4177.19	-0.635685	0.0524085	-12.1294	7.3776e-34	2.24227e-32	0.0024215	5351.67	3580.5	ENSG00000148154	UGCG	UDP-glucose ceramide glucosyltransferase [Source:HGNC Symbol;Acc:HGNC:12524]
ENSG00000169714	11329.6	0.458875	0.0378387	12.1272	7.58411e-34	2.30002e-32	0.00127413	8864	12649.5	ENSG00000169714	CNBP	CCHC-type zinc finger nucleic acid binding protein [Source:HGNC Symbol;Acc:HGNC:13164]
ENSG00000085185	1040.97	-0.621517	0.0512829	-12.1194	8.33942e-34	2.52358e-32	0.00165248	1328.33	896.333	ENSG00000085185	BCORL1	BCL6 corepressor like 1 [Source:HGNC Symbol;Acc:HGNC:25657]
ENSG00000230836	563.202	1.0268	0.0847492	12.1157	8.71892e-34	2.6327e-32	0.00436763	325.333	688.5	ENSG00000230836	LINC01293	long intergenic non-protein coding RNA 1293 [Source:HGNC Symbol;Acc:HGNC:50362]
ENSG00000144642	1309.89	-0.963976	0.0795999	-12.1103	9.31849e-34	2.80765e-32	0.00540633	1895.33	1010.83	ENSG00000144642	RBMS3	RNA binding motif single stranded interacting protein 3 [Source:HGNC Symbol;Acc:HGNC:13427]
ENSG00000078668	4408.01	0.483613	0.0399638	12.1013	1.03988e-33	3.12637e-32	0.00127127	3408.67	4942.83	ENSG00000078668	VDAC3	voltage dependent anion channel 3 [Source:HGNC Symbol;Acc:HGNC:12674]
ENSG00000187266	232.374	-1.33124	0.110082	-12.0932	1.14787e-33	3.44362e-32	0.00775968	380.333	156.667	ENSG00000187266	EPOR	erythropoietin receptor [Source:HGNC Symbol;Acc:HGNC:3416]
ENSG00000132688	2003.16	-0.560727	0.0464083	-12.0825	1.30746e-33	3.91395e-32	0.00161202	2496	1755.67	ENSG00000132688	NES	nestin [Source:HGNC Symbol;Acc:HGNC:7756]
ENSG00000171298	1929.17	-0.574923	0.0476277	-12.0712	1.49948e-33	4.47913e-32	0.00170539	2417	1683.83	ENSG00000171298	GAA	glucosidase alpha, acid [Source:HGNC Symbol;Acc:HGNC:4065]
ENSG00000132471	6036.97	-0.647139	0.0536322	-12.0662	1.59226e-33	4.7461e-32	0.00261344	7777.67	5157.5	ENSG00000132471	WBP2	WW domain binding protein 2 [Source:HGNC Symbol;Acc:HGNC:12738]
ENSG00000100304	3096.66	0.695227	0.0576339	12.0628	1.6599e-33	4.93712e-32	0.00278785	2144.33	3602.5	ENSG00000100304	TTLL12	tubulin tyrosine ligase like 12 [Source:HGNC Symbol;Acc:HGNC:28974]
ENSG00000163297	9038.89	-0.44049	0.036522	-12.061	1.69811e-33	5.04001e-32	0.00117876	10730.3	8198.33	ENSG00000163297	ANTXR2	ANTXR cell adhesion molecule 2 [Source:HGNC Symbol;Acc:HGNC:21732]
ENSG00000089351	1017.55	-0.769415	0.063834	-12.0534	1.8617e-33	5.51381e-32	0.00303096	1373	837.167	ENSG00000089351	GRAMD1A	GRAM domain containing 1A [Source:HGNC Symbol;Acc:HGNC:29305]
ENSG00000187514	32470.5	0.471498	0.0391587	12.0407	2.17113e-33	6.4166e-32	0.00143784	25251.3	36339.8	ENSG00000187514	PTMA	prothymosin alpha [Source:HGNC Symbol;Acc:HGNC:9623]
ENSG00000142039	839.41	0.665819	0.0553094	12.0381	2.24094e-33	6.60888e-32	0.00146615	590.333	972.167	ENSG00000142039	CCDC97	coiled-coil domain containing 97 [Source:HGNC Symbol;Acc:HGNC:28289]
ENSG00000171703	1057.33	-0.651564	0.0541319	-12.0366	2.28155e-33	6.71442e-32	0.0019569	1364	902.333	ENSG00000171703	TCEA2	transcription elongation factor A2 [Source:HGNC Symbol;Acc:HGNC:11614]
ENSG00000154359	433.623	-1.00746	0.0837275	-12.0326	2.39541e-33	7.03463e-32	0.00467714	637.333	329.5	ENSG00000154359	LONRF1	LON peptidase N-terminal domain and ring finger 1 [Source:HGNC Symbol;Acc:HGNC:26302]
ENSG00000172889	998.214	-0.769869	0.0639953	-12.0301	2.46898e-33	7.23541e-32	0.00303368	1348.33	820.833	ENSG00000172889	EGFL7	EGF like domain multiple 7 [Source:HGNC Symbol;Acc:HGNC:20594]
ENSG00000087269	4133.85	0.522558	0.0434393	12.0296	2.48295e-33	7.26106e-32	0.00152863	3131.33	4670.17	ENSG00000087269	NOP14	NOP14 nucleolar protein [Source:HGNC Symbol;Acc:HGNC:16821]
ENSG00000151690	1308.11	-0.619815	0.0515415	-12.0256	2.60785e-33	7.61034e-32	0.00185638	1668.33	1126.33	ENSG00000151690	MFSD6	major facilitator superfamily domain containing 6 [Source:HGNC Symbol;Acc:HGNC:24711]
ENSG00000063244	8576.53	0.554557	0.0461385	12.0194	2.81004e-33	8.18321e-32	0.00190684	6392.33	9740.33	ENSG00000063244	U2AF2	U2 small nuclear RNA auxiliary factor 2 [Source:HGNC Symbol;Acc:HGNC:23156]
ENSG00000143952	2270.31	-0.519009	0.0431992	-12.0143	2.98821e-33	8.6839e-32	0.00138755	2780.33	2013.83	ENSG00000143952	VPS54	VPS54, GARP complex subunit [Source:HGNC Symbol;Acc:HGNC:18652]
ENSG00000168209	1628.21	-1.56247	0.130075	-12.012	3.07221e-33	8.90941e-32	0.0156905	2855.67	1001.33	ENSG00000168209	DDIT4	DNA damage inducible transcript 4 [Source:HGNC Symbol;Acc:HGNC:24944]
ENSG00000095321	744.169	-0.975775	0.0812395	-12.0111	3.10719e-33	8.99212e-32	0.00514138	1083	571	ENSG00000095321	CRAT	carnitine O-acetyltransferase [Source:HGNC Symbol;Acc:HGNC:2342]
ENSG00000185551	7278.04	0.619407	0.051576	12.0096	3.16429e-33	9.13837e-32	0.00238888	5241.33	8361.17	ENSG00000185551	NR2F2	nuclear receptor subfamily 2 group F member 2 [Source:HGNC Symbol;Acc:HGNC:7976]
ENSG00000134001	12640.8	0.363646	0.0302865	12.0069	3.26983e-33	9.42362e-32	0.000793032	10376.3	13858.8	ENSG00000134001	EIF2S1	eukaryotic translation initiation factor 2 subunit alpha [Source:HGNC Symbol;Acc:HGNC:3265]
ENSG00000130254	3276.42	0.6724	0.0560337	11.9999	3.55589e-33	1.02268e-31	0.00263844	2297	3798.33	ENSG00000130254	SAFB2	scaffold attachment factor B2 [Source:HGNC Symbol;Acc:HGNC:21605]
ENSG00000177602	1902.44	0.525591	0.0438229	11.9935	3.8414e-33	1.10252e-31	0.00122638	1437.67	2149.17	ENSG00000177602	HASPIN	histone H3 associated protein kinase [Source:HGNC Symbol;Acc:HGNC:19682]
ENSG00000271601	3082.24	-0.455786	0.0380092	-11.9915	3.93894e-33	1.12819e-31	0.00108699	3679	2784.17	ENSG00000271601	LIX1L	limb and CNS expressed 1 like [Source:HGNC Symbol;Acc:HGNC:28715]
ENSG00000184900	6025.91	0.341419	0.0284916	11.9832	4.35374e-33	1.24444e-31	0.000595933	5004	6578.33	ENSG00000184900	SUMO3	small ubiquitin-like modifier 3 [Source:HGNC Symbol;Acc:HGNC:11124]
ENSG00000111801	411.342	-0.887605	0.0740795	-11.9818	4.42684e-33	1.26274e-31	0.0030975	579.667	325.333	ENSG00000111801	BTN3A3	butyrophilin subfamily 3 member A3 [Source:HGNC Symbol;Acc:HGNC:1140]
ENSG00000132436	1364.05	0.589657	0.0492162	11.9809	4.47194e-33	1.27299e-31	0.00144497	998	1558.33	ENSG00000132436	FIGNL1	fidgetin like 1 [Source:HGNC Symbol;Acc:HGNC:13286]
ENSG00000148337	4028.63	0.514338	0.0429486	11.9757	4.76649e-33	1.35407e-31	0.00148126	3064	4541.67	ENSG00000148337	CIZ1	CDKN1A interacting zinc finger protein 1 [Source:HGNC Symbol;Acc:HGNC:16744]
ENSG00000101447	3805.94	0.600241	0.0501387	11.9716	5.00567e-33	1.41912e-31	0.00209806	2771.67	4356.83	ENSG00000101447	FAM83D	family with sequence similarity 83 member D [Source:HGNC Symbol;Acc:HGNC:16122]
ENSG00000196586	3829.03	-0.461395	0.0385667	-11.9636	5.51451e-33	1.5602e-31	0.00118692	4579	3452.67	ENSG00000196586	MYO6	myosin VI [Source:HGNC Symbol;Acc:HGNC:7605]
ENSG00000131368	1448.45	0.666214	0.0557176	11.957	5.97079e-33	1.68587e-31	0.0021287	1017	1677	ENSG00000131368	MRPS25	mitochondrial ribosomal protein S25 [Source:HGNC Symbol;Acc:HGNC:14511]
ENSG00000138448	5667.42	-0.386697	0.0323534	-11.9523	6.31791e-33	1.78027e-31	0.000840365	6576	5219.67	ENSG00000138448	ITGAV	integrin subunit alpha V [Source:HGNC Symbol;Acc:HGNC:6150]
ENSG00000204256	12413.7	0.570858	0.0478191	11.9379	7.51338e-33	2.10975e-31	0.00210091	9174.33	14138.2	ENSG00000204256	BRD2	bromodomain containing 2 [Source:HGNC Symbol;Acc:HGNC:1103]
ENSG00000157212	2018.43	0.524717	0.0439542	11.9378	7.51751e-33	2.10975e-31	0.00127329	1527	2280.83	ENSG00000157212	PAXIP1	PAX interacting protein 1 [Source:HGNC Symbol;Acc:HGNC:8624]
ENSG00000092621	1657.9	-0.837322	0.0701751	-11.9319	8.07173e-33	2.26073e-31	0.00419101	2294.67	1333.67	ENSG00000092621	PHGDH	phosphoglycerate dehydrogenase [Source:HGNC Symbol;Acc:HGNC:8923]
ENSG00000185585	852.035	-1.13574	0.095203	-11.9297	8.29185e-33	2.31772e-31	0.00765971	1311.67	618	ENSG00000185585	OLFML2A	olfactomedin like 2A [Source:HGNC Symbol;Acc:HGNC:27270]
ENSG00000179051	6220.78	0.407856	0.0341919	11.9285	8.41192e-33	2.34657e-31	0.000941294	4997.33	6880.83	ENSG00000179051	RCC2	regulator of chromosome condensation 2 [Source:HGNC Symbol;Acc:HGNC:30297]
ENSG00000105856	955.204	-0.817361	0.0685447	-11.9245	8.82057e-33	2.45565e-31	0.00357487	1314	772.833	ENSG00000105856	HBP1	HMG-box transcription factor 1 [Source:HGNC Symbol;Acc:HGNC:23200]
ENSG00000057252	5145.69	0.417684	0.0350397	11.9203	9.27548e-33	2.57714e-31	0.000958964	4113	5702	ENSG00000057252	SOAT1	sterol O-acyltransferase 1 [Source:HGNC Symbol;Acc:HGNC:11177]
ENSG00000136378	303.121	-1.15107	0.0965816	-11.9181	9.52379e-33	2.64086e-31	0.00601222	467.333	218.833	ENSG00000136378	ADAMTS7	ADAM metallopeptidase with thrombospondin type 1 motif 7 [Source:HGNC Symbol;Acc:HGNC:223]
ENSG00000166900	3413.71	0.807453	0.0677584	11.9166	9.69298e-33	2.68243e-31	0.00402927	2224	4042.33	ENSG00000166900	STX3	syntaxin 3 [Source:HGNC Symbol;Acc:HGNC:11438]
ENSG00000146670	4948.08	0.476332	0.0399917	11.9108	1.04036e-32	2.87339e-31	0.00130273	3838.33	5543.33	ENSG00000146670	CDCA5	cell division cycle associated 5 [Source:HGNC Symbol;Acc:HGNC:14626]
ENSG00000131504	15968.6	0.380223	0.0319742	11.8916	1.3093e-32	3.60901e-31	0.000912056	13007.7	17563.3	ENSG00000131504	DIAPH1	diaphanous related formin 1 [Source:HGNC Symbol;Acc:HGNC:2876]
ENSG00000101412	2956.84	0.411587	0.0346211	11.8883	1.36103e-32	3.74419e-31	0.00076826	2369	3272.17	ENSG00000101412	E2F1	E2F transcription factor 1 [Source:HGNC Symbol;Acc:HGNC:3113]
ENSG00000144036	2943.39	-0.500314	0.0420953	-11.8853	1.41204e-32	3.87685e-31	0.0013891	3576.67	2624.83	ENSG00000144036	EXOC6B	exocyst complex component 6B [Source:HGNC Symbol;Acc:HGNC:17085]
ENSG00000135446	3168.9	0.509434	0.0429037	11.8739	1.61737e-32	4.43184e-31	0.00139921	2418.33	3570	ENSG00000135446	CDK4	cyclin dependent kinase 4 [Source:HGNC Symbol;Acc:HGNC:1773]
ENSG00000163364	745.164	0.882101	0.0743212	11.8688	1.72001e-32	4.70383e-31	0.00350375	466.667	892.5	ENSG00000163364	LINC01116	long intergenic non-protein coding RNA 1116 [Source:HGNC Symbol;Acc:HGNC:49259]
ENSG00000117151	1965.86	-0.708487	0.0597199	-11.8635	1.8315e-32	4.99374e-31	0.00296721	2594.67	1648	ENSG00000117151	CTBS	chitobiase [Source:HGNC Symbol;Acc:HGNC:2496]
ENSG00000104133	2887.25	-0.543568	0.0458188	-11.8634	1.83319e-32	4.99374e-31	0.00169922	3569	2544.67	ENSG00000104133	SPG11	SPG11, spatacsin vesicle trafficking associated [Source:HGNC Symbol;Acc:HGNC:11226]
ENSG00000112245	7017.83	0.365437	0.0308178	11.858	1.95561e-32	5.3168e-31	0.000753337	5757.33	7697	ENSG00000112245	PTP4A1	protein tyrosine phosphatase type IVA, member 1 [Source:HGNC Symbol;Acc:HGNC:9634]
ENSG00000183248	143.157	-1.85127	0.156125	-11.8576	1.96469e-32	5.33109e-31	0.0166641	270.333	77.8333	ENSG00000183248	PRR36	proline rich 36 [Source:HGNC Symbol;Acc:HGNC:26172]
ENSG00000124541	2859.6	0.654491	0.0552224	11.8519	2.1033e-32	5.69609e-31	0.00249938	2025	3305.33	ENSG00000124541	RRP36	ribosomal RNA processing 36 [Source:HGNC Symbol;Acc:HGNC:21374]
ENSG00000137411	2841.47	0.505901	0.0427147	11.8437	2.31968e-32	6.26988e-31	0.00134158	2171	3200.17	ENSG00000137411	VARS2	valyl-tRNA synthetase 2, mitochondrial [Source:HGNC Symbol;Acc:HGNC:21642]
ENSG00000117266	214.764	-1.84822	0.156117	-11.8387	2.46331e-32	6.6452e-31	0.0189159	404.667	116.833	ENSG00000117266	CDK18	cyclin dependent kinase 18 [Source:HGNC Symbol;Acc:HGNC:8751]
ENSG00000167325	9881.48	0.359344	0.0303601	11.8361	2.541e-32	6.84152e-31	0.000772796	8130.67	10826.2	ENSG00000167325	RRM1	ribonucleotide reductase catalytic subunit M1 [Source:HGNC Symbol;Acc:HGNC:10451]
ENSG00000162377	1690.02	0.772538	0.0652783	11.8345	2.58773e-32	6.95389e-31	0.00333262	1122.67	1990.5	ENSG00000162377	COA7	cytochrome c oxidase assembly factor 7 (putative) [Source:HGNC Symbol;Acc:HGNC:25716]
ENSG00000011201	583.775	-1.25706	0.106289	-11.8269	2.83554e-32	7.60515e-31	0.00931616	931.667	405.167	ENSG00000011201	ANOS1	anosmin 1 [Source:HGNC Symbol;Acc:HGNC:6211]
ENSG00000091129	686.226	-0.689495	0.0583188	-11.8229	2.9742e-32	7.9617e-31	0.00194916	899	578.333	ENSG00000091129	NRCAM	neuronal cell adhesion molecule [Source:HGNC Symbol;Acc:HGNC:7994]
ENSG00000131153	1131.54	1.0001	0.0846818	11.8101	3.46338e-32	9.25341e-31	0.00564343	664.333	1378	ENSG00000131153	GINS2	GINS complex subunit 2 [Source:HGNC Symbol;Acc:HGNC:24575]
ENSG00000137628	517.821	-0.780301	0.0661636	-11.7935	4.21671e-32	1.12446e-30	0.00246956	701.667	424.167	ENSG00000137628	DDX60	DExD/H-box helicase 60 [Source:HGNC Symbol;Acc:HGNC:25942]
ENSG00000099783	10899.5	0.454422	0.0385384	11.7914	4.32324e-32	1.15066e-30	0.00132164	8549.67	12160	ENSG00000099783	HNRNPM	heterogeneous nuclear ribonucleoprotein M [Source:HGNC Symbol;Acc:HGNC:5046]
ENSG00000108306	1439.03	-0.916667	0.0777432	-11.791	4.34581e-32	1.15446e-30	0.00518623	2051.67	1127.67	ENSG00000108306	FBXL20	F-box and leucine rich repeat protein 20 [Source:HGNC Symbol;Acc:HGNC:24679]
ENSG00000065320	254.258	-1.70609	0.144831	-11.7799	4.95663e-32	1.31422e-30	0.016446	461.667	147.333	ENSG00000065320	NTN1	netrin 1 [Source:HGNC Symbol;Acc:HGNC:8029]
ENSG00000163714	6289.7	0.401293	0.0340761	11.7764	5.16582e-32	1.36708e-30	0.00093606	5064.67	6947.5	ENSG00000163714	U2SURP	U2 snRNP associated SURP domain containing [Source:HGNC Symbol;Acc:HGNC:30855]
ENSG00000183155	748.448	0.830679	0.0706038	11.7654	5.88748e-32	1.5551e-30	0.00302996	482	888.5	ENSG00000183155	RABIF	RAB interacting factor [Source:HGNC Symbol;Acc:HGNC:9797]
ENSG00000169047	5480.75	0.493403	0.0419817	11.7528	6.83014e-32	1.80067e-30	0.00148101	4215	6157	ENSG00000169047	IRS1	insulin receptor substrate 1 [Source:HGNC Symbol;Acc:HGNC:6125]
ENSG00000164032	8720.74	0.4555	0.0387677	11.7495	7.10394e-32	1.86932e-30	0.00131225	6838.33	9726.33	ENSG00000164032	H2AFZ	H2A histone family member Z [Source:HGNC Symbol;Acc:HGNC:4741]
ENSG00000225206	1024.23	1.24078	0.105609	11.7487	7.16754e-32	1.88249e-30	0.0091863	524	1288.83	ENSG00000225206	MIR137HG	MIR137 host gene [Source:HGNC Symbol;Acc:HGNC:42871]
ENSG00000132361	6502.28	0.675924	0.0575777	11.7393	8.01113e-32	2.10009e-30	0.00299455	4543.67	7542.17	ENSG00000132361	CLUH	clustered mitochondria homolog [Source:HGNC Symbol;Acc:HGNC:29094]
ENSG00000105613	224.415	-1.24482	0.106087	-11.734	8.53729e-32	2.23382e-30	0.00681493	357.667	156.5	ENSG00000105613	MAST1	microtubule associated serine/threonine kinase 1 [Source:HGNC Symbol;Acc:HGNC:19034]
ENSG00000198910	2241.32	-0.451109	0.038453	-11.7314	8.79738e-32	2.29755e-30	0.00100637	2671.33	2027.17	ENSG00000198910	L1CAM	L1 cell adhesion molecule [Source:HGNC Symbol;Acc:HGNC:6470]
ENSG00000169499	1465.42	-0.667934	0.0569391	-11.7307	8.87475e-32	2.31342e-30	0.00249653	1904.33	1244.5	ENSG00000169499	PLEKHA2	pleckstrin homology domain containing A2 [Source:HGNC Symbol;Acc:HGNC:14336]
ENSG00000113575	8608.75	0.422175	0.0360388	11.7145	1.0747e-31	2.79623e-30	0.00111582	6866.67	9542	ENSG00000113575	PPP2CA	protein phosphatase 2 catalytic subunit alpha [Source:HGNC Symbol;Acc:HGNC:9299]
ENSG00000015532	1566.95	-0.545784	0.0466094	-11.7097	1.1365e-31	2.95151e-30	0.00150163	1939	1379.33	ENSG00000015532	XYLT2	xylosyltransferase 2 [Source:HGNC Symbol;Acc:HGNC:15517]
ENSG00000099381	3112.52	0.600406	0.0513324	11.6964	1.32906e-31	3.44517e-30	0.00214368	2264.33	3564.17	ENSG00000099381	SETD1A	SET domain containing 1A [Source:HGNC Symbol;Acc:HGNC:29010]
ENSG00000138131	294.562	-1.32561	0.113342	-11.6957	1.3401e-31	3.46731e-30	0.00928024	480.333	199.167	ENSG00000138131	LOXL4	lysyl oxidase like 4 [Source:HGNC Symbol;Acc:HGNC:17171]
ENSG00000196584	1396.87	0.931382	0.0797936	11.6724	1.76396e-31	4.55552e-30	0.00513605	850.333	1684.5	ENSG00000196584	XRCC2	X-ray repair cross complementing 2 [Source:HGNC Symbol;Acc:HGNC:12829]
ENSG00000111665	2062.38	0.569631	0.0488334	11.6648	1.92897e-31	4.97245e-30	0.00171174	1524	2347.67	ENSG00000111665	CDCA3	cell division cycle associated 3 [Source:HGNC Symbol;Acc:HGNC:14624]
ENSG00000183684	5401.57	0.754382	0.0647718	11.6468	2.38362e-31	6.13308e-30	0.00379456	3624	6339	ENSG00000183684	ALYREF	Aly/REF export factor [Source:HGNC Symbol;Acc:HGNC:19071]
ENSG00000088356	1072.45	0.804157	0.0690667	11.6432	2.48569e-31	6.38392e-30	0.00336821	700	1269.83	ENSG00000088356	PDRG1	p53 and DNA damage regulated 1 [Source:HGNC Symbol;Acc:HGNC:16119]
ENSG00000189308	1591.94	0.52224	0.0448741	11.6379	2.64512e-31	6.78086e-30	0.00119626	1206	1798.17	ENSG00000189308	LIN54	lin-54 DREAM MuvB core complex component [Source:HGNC Symbol;Acc:HGNC:25397]
ENSG00000165501	1890.69	0.771346	0.0663746	11.6211	3.21984e-31	8.239e-30	0.00355239	1255.67	2224.17	ENSG00000165501	LRR1	leucine rich repeat protein 1 [Source:HGNC Symbol;Acc:HGNC:19742]
ENSG00000151348	5277.21	-0.430344	0.0370491	-11.6155	3.43721e-31	8.77908e-30	0.0011424	6234.33	4799.83	ENSG00000151348	EXT2	exostosin glycosyltransferase 2 [Source:HGNC Symbol;Acc:HGNC:3513]
ENSG00000165072	291.535	-1.16571	0.100413	-11.6091	3.70592e-31	9.44805e-30	0.00662042	453	209.5	ENSG00000165072	MAMDC2	MAM domain containing 2 [Source:HGNC Symbol;Acc:HGNC:23673]
ENSG00000117533	579.299	-0.775358	0.0668343	-11.6012	4.06332e-31	1.03403e-29	0.00273924	784	475.333	ENSG00000117533	VAMP4	vesicle associated membrane protein 4 [Source:HGNC Symbol;Acc:HGNC:12645]
ENSG00000157214	336.419	-1.22449	0.105679	-11.5869	4.80081e-31	1.21948e-29	0.0080644	530.667	236.333	ENSG00000157214	STEAP2	STEAP2 metalloreductase [Source:HGNC Symbol;Acc:HGNC:17885]
ENSG00000128245	6242.92	0.440376	0.0380075	11.5865	4.82191e-31	1.2226e-29	0.00120474	4932.33	6945.17	ENSG00000128245	YWHAH	tyrosine 3-monooxygenase/tryptophan 5-monooxygenase activation protein eta [Source:HGNC Symbol;Acc:HGNC:12853]
ENSG00000127311	440.257	-0.893439	0.0772008	-11.5729	5.65235e-31	1.43056e-29	0.00369486	621.667	347.833	ENSG00000127311	HELB	DNA helicase B [Source:HGNC Symbol;Acc:HGNC:17196]
ENSG00000105290	243.033	-1.14956	0.0993914	-11.566	6.12711e-31	1.5479e-29	0.00581298	375.333	175.5	ENSG00000105290	APLP1	amyloid beta precursor like protein 1 [Source:HGNC Symbol;Acc:HGNC:597]
ENSG00000232956	724.813	1.16752	0.100955	11.5648	6.21664e-31	1.56767e-29	0.00770053	387.667	903.5	ENSG00000232956	SNHG15	small nucleolar RNA host gene 15 [Source:HGNC Symbol;Acc:HGNC:27797]
ENSG00000105127	1875.35	0.62506	0.0541392	11.5454	7.78636e-31	1.95997e-29	0.00216631	1346	2156.17	ENSG00000105127	AKAP8	A-kinase anchoring protein 8 [Source:HGNC Symbol;Acc:HGNC:378]
ENSG00000174485	1875.5	-0.703899	0.0609772	-11.5436	7.94798e-31	1.99704e-29	0.00309071	2470	1575	ENSG00000174485	DENND4A	DENN domain containing 4A [Source:HGNC Symbol;Acc:HGNC:24321]
ENSG00000126882	190.988	-1.29558	0.112265	-11.5404	8.25308e-31	2.06996e-29	0.00739385	308.333	130.5	ENSG00000126882	FAM78A	family with sequence similarity 78 member A [Source:HGNC Symbol;Acc:HGNC:25465]
ENSG00000170004	10450	-0.417545	0.0361833	-11.5397	8.3214e-31	2.08334e-29	0.00116871	12263	9542.83	ENSG00000170004	CHD3	chromodomain helicase DNA binding protein 3 [Source:HGNC Symbol;Acc:HGNC:1918]
ENSG00000124207	27519	0.247759	0.0214711	11.5392	8.37125e-31	2.09206e-29	0.000403771	23917.7	29483.8	ENSG00000124207	CSE1L	chromosome segregation 1 like [Source:HGNC Symbol;Acc:HGNC:2431]
ENSG00000164338	1872.98	0.539004	0.0467241	11.5359	8.698e-31	2.16982e-29	0.00146627	1406.67	2122	ENSG00000164338	UTP15	UTP15, small subunit processome component [Source:HGNC Symbol;Acc:HGNC:25758]
ENSG00000146083	1836.32	-0.628525	0.0544982	-11.533	9.00046e-31	2.24126e-29	0.00235828	2347	1577.67	ENSG00000146083	RNF44	ring finger protein 44 [Source:HGNC Symbol;Acc:HGNC:19180]
ENSG00000146278	1399.3	-0.777385	0.0674087	-11.5324	9.05654e-31	2.2512e-29	0.00372326	1897.33	1146.17	ENSG00000146278	PNRC1	proline rich nuclear receptor coactivator 1 [Source:HGNC Symbol;Acc:HGNC:17278]
ENSG00000151725	2640.37	0.628242	0.0544907	11.5293	9.3864e-31	2.32903e-29	0.00239083	1893	3037.17	ENSG00000151725	CENPU	centromere protein U [Source:HGNC Symbol;Acc:HGNC:21348]
ENSG00000124406	229.583	-1.29845	0.112674	-11.5239	9.99264e-31	2.47505e-29	0.00827755	372	157	ENSG00000124406	ATP8A1	ATPase phospholipid transporting 8A1 [Source:HGNC Symbol;Acc:HGNC:13531]
ENSG00000166598	37399.4	-0.709574	0.0615894	-11.521	1.03348e-30	2.55524e-29	0.00362079	49350.3	31345.3	ENSG00000166598	HSP90B1	heat shock protein 90 beta family member 1 [Source:HGNC Symbol;Acc:HGNC:12028]
ENSG00000273841	2264.65	0.495931	0.0430492	11.5201	1.04509e-30	2.57936e-29	0.00126598	1738	2544.67	ENSG00000273841	TAF9	TATA-box binding protein associated factor 9 [Source:HGNC Symbol;Acc:HGNC:11542]
ENSG00000150990	1709.13	0.931578	0.0808944	11.516	1.09611e-30	2.7005e-29	0.00548543	1041	2062.83	ENSG00000150990	DHX37	DEAH-box helicase 37 [Source:HGNC Symbol;Acc:HGNC:17210]
ENSG00000175482	205.818	-1.27585	0.110797	-11.5152	1.1063e-30	2.7208e-29	0.00742385	330	141.667	ENSG00000175482	POLD4	DNA polymerase delta 4, accessory subunit [Source:HGNC Symbol;Acc:HGNC:14106]
ENSG00000276023	2374.29	0.687988	0.0597489	11.5147	1.11293e-30	2.73227e-29	0.00290491	1649.33	2758.67	ENSG00000276023	DUSP14	dual specificity phosphatase 14 [Source:HGNC Symbol;Acc:HGNC:17007]
ENSG00000137942	3112.2	-0.501355	0.0435426	-11.5141	1.11988e-30	2.7445e-29	0.00152526	3785	2775.33	ENSG00000137942	FNBP1L	formin binding protein 1 like [Source:HGNC Symbol;Acc:HGNC:20851]
ENSG00000219481	836.153	1.02809	0.0893368	11.508	1.20167e-30	2.93976e-29	0.00596109	483	1021.83	ENSG00000219481	NBPF1	NBPF member 1 [Source:HGNC Symbol;Acc:HGNC:26088]
ENSG00000130702	18976.1	-0.726099	0.0631101	-11.5053	1.24079e-30	3.03014e-29	0.00377959	25171.3	15835.8	ENSG00000130702	LAMA5	laminin subunit alpha 5 [Source:HGNC Symbol;Acc:HGNC:6485]
ENSG00000225648	810.793	0.783996	0.0682151	11.493	1.43072e-30	3.48786e-29	0.00287647	535.667	957	ENSG00000225648	SBDSP1	SBDS, ribosome maturation factor pseudogene 1 [Source:HGNC Symbol;Acc:HGNC:21646]
ENSG00000100242	2489.26	-0.477906	0.0415877	-11.4915	1.45499e-30	3.54081e-29	0.00129003	2999.67	2233.83	ENSG00000100242	SUN2	Sad1 and UNC84 domain containing 2 [Source:HGNC Symbol;Acc:HGNC:14210]
ENSG00000028277	1807.85	-0.722256	0.0628833	-11.4857	1.55742e-30	3.78346e-29	0.00330017	2393.33	1509.67	ENSG00000028277	POU2F2	POU class 2 homeobox 2 [Source:HGNC Symbol;Acc:HGNC:9213]
ENSG00000167123	1257.7	-0.635593	0.0553387	-11.4855	1.56023e-30	3.78371e-29	0.00221954	1613.67	1078	ENSG00000167123	CERCAM	cerebral endothelial cell adhesion molecule [Source:HGNC Symbol;Acc:HGNC:23723]
ENSG00000183048	414.607	1.0479	0.091245	11.4845	1.57844e-30	3.82121e-29	0.00452684	236.667	508.167	ENSG00000183048	SLC25A10	solute carrier family 25 member 10 [Source:HGNC Symbol;Acc:HGNC:10980]
ENSG00000198000	2040.91	0.533973	0.0465028	11.4826	1.61379e-30	3.9e-29	0.00149948	1537.33	2311.67	ENSG00000198000	NOL8	nucleolar protein 8 [Source:HGNC Symbol;Acc:HGNC:23387]
ENSG00000054118	13143.3	0.372205	0.0324323	11.4763	1.73467e-30	4.18487e-29	0.000925509	10749	14439.2	ENSG00000054118	THRAP3	thyroid hormone receptor associated protein 3 [Source:HGNC Symbol;Acc:HGNC:22964]
ENSG00000132768	914.034	0.743484	0.0648191	11.4701	1.86373e-30	4.48844e-29	0.00264382	616.333	1071.17	ENSG00000132768	DPH2	DPH2 homolog [Source:HGNC Symbol;Acc:HGNC:3004]
ENSG00000141030	5102.6	0.35414	0.0308847	11.4665	1.9432e-30	4.67173e-29	0.000698304	4209.33	5583.83	ENSG00000141030	COPS3	COP9 signalosome subunit 3 [Source:HGNC Symbol;Acc:HGNC:2239]
ENSG00000149658	5509.83	0.41269	0.0359966	11.4647	1.98432e-30	4.76237e-29	0.00103919	4413.33	6097.33	ENSG00000149658	YTHDF1	YTH N6-methyladenosine RNA binding protein 1 [Source:HGNC Symbol;Acc:HGNC:15867]
ENSG00000156983	2171.04	0.644427	0.0562122	11.4642	1.99604e-30	4.78225e-29	0.00247075	1544	2504.5	ENSG00000156983	BRPF1	bromodomain and PHD finger containing 1 [Source:HGNC Symbol;Acc:HGNC:14255]
ENSG00000084652	7244.18	0.400543	0.0349454	11.462	2.04826e-30	4.89893e-29	0.00101743	5837	7998.67	ENSG00000084652	TXLNA	taxilin alpha [Source:HGNC Symbol;Acc:HGNC:30685]
ENSG00000197442	899.863	-1.00676	0.0878469	-11.4604	2.08504e-30	4.97835e-29	0.00642299	1323.33	684.167	ENSG00000197442	MAP3K5	mitogen-activated protein kinase kinase kinase 5 [Source:HGNC Symbol;Acc:HGNC:6857]
ENSG00000005194	1873.67	0.655841	0.0572282	11.4601	2.09268e-30	4.98804e-29	0.00248894	1323	2164	ENSG00000005194	CIAPIN1	cytokine induced apoptosis inhibitor 1 [Source:HGNC Symbol;Acc:HGNC:28050]
ENSG00000159212	614.157	-0.747997	0.0652938	-11.4559	2.19769e-30	5.22937e-29	0.00262941	822.333	508.667	ENSG00000159212	CLIC6	chloride intracellular channel 6 [Source:HGNC Symbol;Acc:HGNC:2065]
ENSG00000099998	2104.36	-0.492889	0.0430688	-11.4442	2.51334e-30	5.97025e-29	0.0013434	2550	1882.17	ENSG00000099998	GGT5	gamma-glutamyltransferase 5 [Source:HGNC Symbol;Acc:HGNC:4260]
ENSG00000140632	2732.43	0.435129	0.0380252	11.4432	2.54399e-30	6.03276e-29	0.000971274	2165	3037.83	ENSG00000140632	GLYR1	glyoxylate reductase 1 homolog [Source:HGNC Symbol;Acc:HGNC:24434]
ENSG00000090565	1559.98	0.572048	0.0499999	11.441	2.60888e-30	6.17613e-29	0.00163541	1152.33	1778.5	ENSG00000090565	RAB11FIP3	RAB11 family interacting protein 3 [Source:HGNC Symbol;Acc:HGNC:17224]
ENSG00000068654	7124.85	0.687458	0.0601229	11.4342	2.82059e-30	6.66599e-29	0.00329836	4952.33	8278.17	ENSG00000068654	POLR1A	RNA polymerase I subunit A [Source:HGNC Symbol;Acc:HGNC:17264]
ENSG00000204574	7879.84	0.396721	0.0347246	11.4248	3.1449e-30	7.41984e-29	0.00101541	6362.33	8695.83	ENSG00000204574	ABCF1	ATP binding cassette subfamily F member 1 [Source:HGNC Symbol;Acc:HGNC:70]
ENSG00000215717	1614.09	-0.520138	0.0455383	-11.422	3.24732e-30	7.64851e-29	0.00142215	1976.67	1431.17	ENSG00000215717	TMEM167B	transmembrane protein 167B [Source:HGNC Symbol;Acc:HGNC:30187]
ENSG00000138750	2033.75	0.439958	0.0385411	11.4153	3.50697e-30	8.24611e-29	0.000864781	1607.33	2263.33	ENSG00000138750	NUP54	nucleoporin 54 [Source:HGNC Symbol;Acc:HGNC:17359]
ENSG00000164733	3959.59	-0.58851	0.051574	-11.411	3.68547e-30	8.65121e-29	0.00232509	4991.33	3442.17	ENSG00000164733	CTSB	cathepsin B [Source:HGNC Symbol;Acc:HGNC:2527]
ENSG00000079385	191.273	-1.32927	0.116504	-11.4097	3.74064e-30	8.76595e-29	0.00832296	312.667	129	ENSG00000079385	CEACAM1	carcinoembryonic antigen related cell adhesion molecule 1 [Source:HGNC Symbol;Acc:HGNC:1814]
ENSG00000106479	359.778	-1.02563	0.0899781	-11.3987	4.24575e-30	9.93292e-29	0.00529828	532	271.833	ENSG00000106479	ZNF862	zinc finger protein 862 [Source:HGNC Symbol;Acc:HGNC:34519]
ENSG00000178966	1555.86	0.629079	0.0551918	11.3981	4.27542e-30	9.98554e-29	0.00214233	1115	1790.33	ENSG00000178966	RMI1	RecQ mediated genome instability 1 [Source:HGNC Symbol;Acc:HGNC:25764]
ENSG00000145730	7142.71	-0.754755	0.0663111	-11.382	5.13962e-30	1.19838e-28	0.0040991	9599	5901.33	ENSG00000145730	PAM	peptidylglycine alpha-amidating monooxygenase [Source:HGNC Symbol;Acc:HGNC:8596]
ENSG00000275835	1171.29	0.629257	0.0552958	11.3798	5.27007e-30	1.22675e-28	0.00189572	838.667	1348.17	ENSG00000275835	TUBGCP5	tubulin gamma complex associated protein 5 [Source:HGNC Symbol;Acc:HGNC:18600]
ENSG00000114796	1428.16	-1.2409	0.109325	-11.3506	7.36773e-30	1.71124e-28	0.0108559	2270.33	996.167	ENSG00000114796	KLHL24	kelch like family member 24 [Source:HGNC Symbol;Acc:HGNC:25947]
ENSG00000167363	179.278	-1.37609	0.121236	-11.3505	7.37604e-30	1.71124e-28	0.0090704	297	118.833	ENSG00000167363	FN3K	fructosamine 3 kinase [Source:HGNC Symbol;Acc:HGNC:24822]
ENSG00000089195	1792.33	0.7026	0.0619068	11.3493	7.4746e-30	1.73122e-28	0.00298285	1236.67	2087.67	ENSG00000089195	TRMT6	tRNA methyltransferase 6 [Source:HGNC Symbol;Acc:HGNC:20900]
ENSG00000221963	2223.31	-0.645906	0.0569256	-11.3465	7.71885e-30	1.78482e-28	0.0027051	2863	1899.67	ENSG00000221963	APOL6	apolipoprotein L6 [Source:HGNC Symbol;Acc:HGNC:14870]
ENSG00000105135	2108.06	0.465361	0.0410318	11.3415	8.17457e-30	1.88707e-28	0.00107049	1645	2357	ENSG00000105135	ILVBL	ilvB acetolactate synthase like [Source:HGNC Symbol;Acc:HGNC:6041]
ENSG00000125445	2558.02	0.597339	0.0526755	11.34	8.31838e-30	1.91708e-28	0.0021943	1865.67	2927.5	ENSG00000125445	MRPS7	mitochondrial ribosomal protein S7 [Source:HGNC Symbol;Acc:HGNC:14499]
ENSG00000242372	6826.16	0.458013	0.0403917	11.3393	8.38333e-30	1.92886e-28	0.00139904	5347.33	7618	ENSG00000242372	EIF6	eukaryotic translation initiation factor 6 [Source:HGNC Symbol;Acc:HGNC:6159]
ENSG00000196230	64435.3	0.326196	0.0287675	11.339	8.40528e-30	1.93072e-28	0.000778076	53913.7	70140	ENSG00000196230	TUBB	tubulin beta class I [Source:HGNC Symbol;Acc:HGNC:20778]
ENSG00000117298	8144.66	-0.474132	0.041826	-11.3358	8.72144e-30	2.00004e-28	0.00156729	9803	7321	ENSG00000117298	ECE1	endothelin converting enzyme 1 [Source:HGNC Symbol;Acc:HGNC:3146]
ENSG00000162413	2073.08	0.887351	0.0782965	11.3332	8.98424e-30	2.05692e-28	0.00524073	1295.33	2485.83	ENSG00000162413	KLHL21	kelch like family member 21 [Source:HGNC Symbol;Acc:HGNC:29041]
ENSG00000184990	1191.12	0.619345	0.0546889	11.3249	9.88242e-30	2.25884e-28	0.00185263	858	1368.5	ENSG00000184990	SIVA1	SIVA1 apoptosis inducing factor [Source:HGNC Symbol;Acc:HGNC:17712]
ENSG00000108846	584.362	-1.30673	0.115391	-11.3244	9.93526e-30	2.26719e-28	0.0112516	944.333	398.167	ENSG00000108846	ABCC3	ATP binding cassette subfamily C member 3 [Source:HGNC Symbol;Acc:HGNC:54]
ENSG00000133243	2104.69	-0.492173	0.043465	-11.3234	1.00476e-29	2.28909e-28	0.00137639	2552	1882.17	ENSG00000133243	BTBD2	BTB domain containing 2 [Source:HGNC Symbol;Acc:HGNC:15504]
ENSG00000276410	4178.41	0.819566	0.0724166	11.3174	1.0765e-29	2.4485e-28	0.00472521	2706	4958.5	ENSG00000276410	HIST1H2BB	histone cluster 1 H2B family member b [Source:HGNC Symbol;Acc:HGNC:4751]
ENSG00000274267	16033.3	0.639759	0.0565378	11.3156	1.09854e-29	2.49457e-28	0.0029951	11429.7	18476.5	ENSG00000274267	HIST1H3B	histone cluster 1 H3 family member b [Source:HGNC Symbol;Acc:HGNC:4776]
ENSG00000104969	3345.64	0.63345	0.0559855	11.3145	1.11211e-29	2.52126e-28	0.0026463	2393.33	3853.67	ENSG00000104969	SGTA	small glutamine rich tetratricopeptide repeat containing alpha [Source:HGNC Symbol;Acc:HGNC:10819]
ENSG00000092853	4843.87	0.760988	0.06732	11.304	1.2531e-29	2.83628e-28	0.00409006	3239.33	5690.17	ENSG00000092853	CLSPN	claspin [Source:HGNC Symbol;Acc:HGNC:19715]
ENSG00000186193	1409.42	0.66372	0.0587855	11.2905	1.46158e-29	3.30278e-28	0.00244346	992	1631.33	ENSG00000186193	SAPCD2	suppressor APC domain containing 2 [Source:HGNC Symbol;Acc:HGNC:28055]
ENSG00000172183	600.158	-0.808097	0.0715832	-11.2889	1.48845e-29	3.35806e-28	0.00342751	822	487.333	ENSG00000172183	ISG20	interferon stimulated exonuclease gene 20 [Source:HGNC Symbol;Acc:HGNC:6130]
ENSG00000135842	3139.35	-0.87281	0.0773266	-11.2873	1.51593e-29	3.41452e-28	0.00546034	4402.33	2498.83	ENSG00000135842	FAM129A	family with sequence similarity 129 member A [Source:HGNC Symbol;Acc:HGNC:16784]
ENSG00000157227	17574.7	-0.689249	0.0610799	-11.2844	1.56737e-29	3.52468e-28	0.00353339	23057.3	14812	ENSG00000157227	MMP14	matrix metallopeptidase 14 [Source:HGNC Symbol;Acc:HGNC:7160]
ENSG00000132155	6321.08	0.368006	0.0326287	11.2786	1.67382e-29	3.75799e-28	0.000846043	5178.33	6935.83	ENSG00000132155	RAF1	Raf-1 proto-oncogene, serine/threonine kinase [Source:HGNC Symbol;Acc:HGNC:9829]
ENSG00000130164	16911.5	-0.51658	0.0458196	-11.2742	1.75934e-29	3.94363e-28	0.00196288	20697.7	15013.7	ENSG00000130164	LDLR	low density lipoprotein receptor [Source:HGNC Symbol;Acc:HGNC:6547]
ENSG00000125746	1064.22	-1.20826	0.1072	-11.2711	1.82363e-29	4.08117e-28	0.0102001	1670.67	752.333	ENSG00000125746	EML2	echinoderm microtubule associated protein like 2 [Source:HGNC Symbol;Acc:HGNC:18035]
ENSG00000159069	2875.84	0.496196	0.0440464	11.2653	1.94654e-29	4.34926e-28	0.00145881	2207.67	3232	ENSG00000159069	FBXW5	F-box and WD repeat domain containing 5 [Source:HGNC Symbol;Acc:HGNC:13613]
ENSG00000006534	1022.84	-1.13005	0.100328	-11.2635	1.98656e-29	4.43156e-28	0.00879803	1567	744.167	ENSG00000006534	ALDH3B1	aldehyde dehydrogenase 3 family member B1 [Source:HGNC Symbol;Acc:HGNC:410]
ENSG00000028116	1060.47	0.652193	0.0579089	11.2624	2.0123e-29	4.4818e-28	0.00206149	751.333	1224.5	ENSG00000028116	VRK2	VRK serine/threonine kinase 2 [Source:HGNC Symbol;Acc:HGNC:12719]
ENSG00000131652	1572.19	0.528326	0.0469131	11.2618	2.02598e-29	4.50506e-28	0.00136517	1186.67	1777.5	ENSG00000131652	THOC6	THO complex 6 [Source:HGNC Symbol;Acc:HGNC:28369]
ENSG00000171793	4583.43	0.607642	0.0539884	11.255	2.18723e-29	4.85587e-28	0.0025364	3318.33	5255.83	ENSG00000171793	CTPS1	CTP synthase 1 [Source:HGNC Symbol;Acc:HGNC:2519]
ENSG00000075131	802.661	0.710848	0.0631819	11.2508	2.29433e-29	5.08553e-28	0.00226922	551.667	936.667	ENSG00000075131	TIPIN	TIMELESS interacting protein [Source:HGNC Symbol;Acc:HGNC:30750]
ENSG00000129354	1804.02	0.707175	0.0628616	11.2497	2.32335e-29	5.14165e-28	0.00310059	1240	2102.17	ENSG00000129354	AP1M2	adaptor related protein complex 1 subunit mu 2 [Source:HGNC Symbol;Acc:HGNC:558]
ENSG00000033867	4141.65	-0.661978	0.0589184	-11.2355	2.72944e-29	6.03077e-28	0.00311654	5358.33	3521.33	ENSG00000033867	SLC4A7	solute carrier family 4 member 7 [Source:HGNC Symbol;Acc:HGNC:11033]
ENSG00000072501	9841.8	0.320117	0.028499	11.2326	2.82157e-29	6.22444e-28	0.000668434	8257.33	10701.3	ENSG00000072501	SMC1A	structural maintenance of chromosomes 1A [Source:HGNC Symbol;Acc:HGNC:11111]
ENSG00000197892	1774.9	-0.542236	0.0482898	-11.2288	2.94438e-29	6.4851e-28	0.00172332	2195.33	1564.17	ENSG00000197892	KIF13B	kinesin family member 13B [Source:HGNC Symbol;Acc:HGNC:14405]
ENSG00000164830	1832.52	-0.480616	0.0428047	-11.2281	2.96802e-29	6.52682e-28	0.00125561	2208.67	1643.17	ENSG00000164830	OXR1	oxidation resistance 1 [Source:HGNC Symbol;Acc:HGNC:15822]
ENSG00000123416	14307.4	0.410367	0.0365667	11.2224	3.16491e-29	6.94883e-28	0.00120561	11480	15829.5	ENSG00000123416	TUBA1B	tubulin alpha 1b [Source:HGNC Symbol;Acc:HGNC:18809]
ENSG00000067182	5036.11	-0.599292	0.0534055	-11.2215	3.19686e-29	7.00791e-28	0.00255938	6373.67	4367.5	ENSG00000067182	TNFRSF1A	TNF receptor superfamily member 1A [Source:HGNC Symbol;Acc:HGNC:11916]
ENSG00000111911	898.337	-0.735469	0.0655538	-11.2193	3.2777e-29	7.17382e-28	0.00312518	1198	746.667	ENSG00000111911	HINT3	histidine triad nucleotide binding protein 3 [Source:HGNC Symbol;Acc:HGNC:18468]
ENSG00000186532	1629.81	0.555826	0.0495444	11.2188	3.29895e-29	7.20901e-28	0.00162864	1213	1851.17	ENSG00000186532	SMYD4	SET and MYND domain containing 4 [Source:HGNC Symbol;Acc:HGNC:21067]
ENSG00000205133	723.198	-0.704105	0.0627672	-11.2177	3.33775e-29	7.28235e-28	0.00253536	952	606.667	ENSG00000205133	TRIQK	triple QxxK/R motif containing [Source:HGNC Symbol;Acc:HGNC:27828]
ENSG00000159259	1608.62	0.692275	0.0617207	11.2162	3.39361e-29	7.39266e-28	0.00288378	1116	1869.5	ENSG00000159259	CHAF1B	chromatin assembly factor 1 subunit B [Source:HGNC Symbol;Acc:HGNC:1911]
ENSG00000187244	700.187	-0.630112	0.0561796	-11.216	3.40195e-29	7.39923e-28	0.00173343	896	601.167	ENSG00000187244	BCAM	basal cell adhesion molecule (Lutheran blood group) [Source:HGNC Symbol;Acc:HGNC:6722]
ENSG00000111142	6313.49	0.347749	0.0310232	11.2093	3.66889e-29	7.94976e-28	0.000748748	5225	6902.83	ENSG00000111142	METAP2	methionyl aminopeptidase 2 [Source:HGNC Symbol;Acc:HGNC:16672]
ENSG00000110104	2223.34	0.95674	0.0853521	11.2093	3.66957e-29	7.94976e-28	0.00637673	1336.33	2692.5	ENSG00000110104	CCDC86	coiled-coil domain containing 86 [Source:HGNC Symbol;Acc:HGNC:28359]
ENSG00000196787	9499.91	0.473603	0.042251	11.2093	3.67219e-29	7.94976e-28	0.00159354	7378.33	10640.7	ENSG00000196787	HIST1H2AG	histone cluster 1 H2A family member g [Source:HGNC Symbol;Acc:HGNC:4737]
ENSG00000075702	2290.65	0.777259	0.0693754	11.2037	3.91211e-29	8.45599e-28	0.00406148	1518.33	2698.33	ENSG00000075702	WDR62	WD repeat domain 62 [Source:HGNC Symbol;Acc:HGNC:24502]
ENSG00000133398	1117.19	0.674274	0.0602033	11.1999	4.0801e-29	8.80542e-28	0.00237166	781.333	1294.33	ENSG00000133398	MED10	mediator complex subunit 10 [Source:HGNC Symbol;Acc:HGNC:28760]
ENSG00000165424	2337.27	-0.665736	0.0594663	-11.1952	4.30485e-29	9.27609e-28	0.00300986	3037.67	1983.33	ENSG00000165424	ZCCHC24	zinc finger CCHC-type containing 24 [Source:HGNC Symbol;Acc:HGNC:26911]
ENSG00000141295	667.817	-0.790184	0.070607	-11.1913	4.498e-29	9.67731e-28	0.00344417	907	545.5	ENSG00000141295	SCRN2	secernin 2 [Source:HGNC Symbol;Acc:HGNC:30381]
ENSG00000101367	14008.9	0.355269	0.0317541	11.1881	4.66089e-29	1.00123e-27	0.000889359	11551.7	15333	ENSG00000101367	MAPRE1	microtubule associated protein RP/EB family member 1 [Source:HGNC Symbol;Acc:HGNC:6890]
ENSG00000167088	3445.26	0.467394	0.04179	11.1843	4.8647e-29	1.0434e-27	0.00134297	2684	3855.33	ENSG00000167088	SNRPD1	small nuclear ribonucleoprotein D1 polypeptide [Source:HGNC Symbol;Acc:HGNC:11158]
ENSG00000122863	2980.24	0.618381	0.0553079	11.1807	5.06896e-29	1.08554e-27	0.00253119	2147.33	3420.33	ENSG00000122863	CHST3	carbohydrate sulfotransferase 3 [Source:HGNC Symbol;Acc:HGNC:1971]
ENSG00000130726	17262	0.703218	0.0628976	11.1804	5.08788e-29	1.08791e-27	0.00372876	11906.7	20094.7	ENSG00000130726	TRIM28	tripartite motif containing 28 [Source:HGNC Symbol;Acc:HGNC:16384]
ENSG00000100485	3668.39	-0.577102	0.051655	-11.1722	5.57619e-29	1.1905e-27	0.00231449	4595	3199.5	ENSG00000100485	SOS2	SOS Ras/Rho guanine nucleotide exchange factor 2 [Source:HGNC Symbol;Acc:HGNC:11188]
ENSG00000172986	626.748	-0.72985	0.0653478	-11.1687	5.80303e-29	1.23703e-27	0.00266396	833.667	522.167	ENSG00000172986	GXYLT2	glucoside xylosyltransferase 2 [Source:HGNC Symbol;Acc:HGNC:33383]
ENSG00000129757	475.237	-1.03978	0.0931323	-11.1646	6.0767e-29	1.29339e-27	0.00645489	705.333	356.5	ENSG00000129757	CDKN1C	cyclin dependent kinase inhibitor 1C [Source:HGNC Symbol;Acc:HGNC:1786]
ENSG00000143376	2545.25	-0.467398	0.0418757	-11.1616	6.28712e-29	1.33613e-27	0.00132077	3050	2291.17	ENSG00000143376	SNX27	sorting nexin family member 27 [Source:HGNC Symbol;Acc:HGNC:20073]
ENSG00000074855	1068.42	-0.625843	0.0560728	-11.1613	6.3087e-29	1.33868e-27	0.00216905	1363	918.167	ENSG00000074855	ANO8	anoctamin 8 [Source:HGNC Symbol;Acc:HGNC:29329]
ENSG00000196510	2547.19	0.440491	0.0394704	11.16	6.39775e-29	1.35551e-27	0.00104766	2011.33	2834.17	ENSG00000196510	ANAPC7	anaphase promoting complex subunit 7 [Source:HGNC Symbol;Acc:HGNC:17380]
ENSG00000119335	25810.5	0.297144	0.0266557	11.1475	7.36825e-29	1.55875e-27	0.000640332	21902.3	27932	ENSG00000119335	SET	SET nuclear proto-oncogene [Source:HGNC Symbol;Acc:HGNC:10760]
ENSG00000120705	13265.5	0.489314	0.0439119	11.1431	7.73966e-29	1.63484e-27	0.00176517	10228.3	14891.3	ENSG00000120705	ETF1	eukaryotic translation termination factor 1 [Source:HGNC Symbol;Acc:HGNC:3477]
ENSG00000169136	601.203	1.7002	0.152809	11.1263	9.3413e-29	1.97017e-27	0.0191798	235.667	792.833	ENSG00000169136	ATF5	activating transcription factor 5 [Source:HGNC Symbol;Acc:HGNC:790]
ENSG00000106066	813.99	-0.8414	0.0756585	-11.121	9.91156e-29	2.08728e-27	0.0043991	1130.67	654.333	ENSG00000106066	CPVL	carboxypeptidase, vitellogenic like [Source:HGNC Symbol;Acc:HGNC:14399]
ENSG00000143603	100.871	-2.74167	0.24722	-11.09	1.4025e-28	2.94907e-27	0.046373	228.333	35.5	ENSG00000143603	KCNN3	potassium calcium-activated channel subfamily N member 3 [Source:HGNC Symbol;Acc:HGNC:6292]
ENSG00000175175	632.42	-0.852372	0.0768621	-11.0896	1.40872e-28	2.95768e-27	0.00425926	879	505.667	ENSG00000175175	PPM1E	protein phosphatase, Mg2+/Mn2+ dependent 1E [Source:HGNC Symbol;Acc:HGNC:19322]
ENSG00000137076	36924.5	-0.234156	0.0211163	-11.0889	1.42069e-28	2.97832e-27	0.000402404	40122.7	35412.7	ENSG00000137076	TLN1	talin 1 [Source:HGNC Symbol;Acc:HGNC:11845]
ENSG00000013016	82.6864	-2.03767	0.183842	-11.0838	1.50313e-28	3.14639e-27	0.0203088	163.333	41.3333	ENSG00000013016	EHD3	EH domain containing 3 [Source:HGNC Symbol;Acc:HGNC:3244]
ENSG00000084073	2799.64	0.383579	0.03462	11.0797	1.57407e-28	3.28779e-27	0.000750259	2276.33	3081.33	ENSG00000084073	ZMPSTE24	zinc metallopeptidase STE24 [Source:HGNC Symbol;Acc:HGNC:12877]
ENSG00000134982	4368.37	0.390389	0.0352349	11.0796	1.5754e-28	3.28779e-27	0.000935107	3538.33	4815.83	ENSG00000134982	APC	APC, WNT signaling pathway regulator [Source:HGNC Symbol;Acc:HGNC:583]
ENSG00000107816	1848.08	-0.518954	0.0468477	-11.0775	1.61345e-28	3.36216e-27	0.00161057	2263.33	1639.5	ENSG00000107816	LZTS2	leucine zipper tumor suppressor 2 [Source:HGNC Symbol;Acc:HGNC:29381]
ENSG00000182810	419.991	0.996883	0.0900429	11.0712	1.73072e-28	3.60114e-27	0.00443555	247	511	ENSG00000182810	DDX28	DEAD-box helicase 28 [Source:HGNC Symbol;Acc:HGNC:17330]
ENSG00000132694	3298.77	0.460751	0.0416242	11.0693	1.76779e-28	3.67278e-27	0.00131551	2577.67	3683.17	ENSG00000132694	ARHGEF11	Rho guanine nucleotide exchange factor 11 [Source:HGNC Symbol;Acc:HGNC:14580]
ENSG00000107902	144.839	-1.45964	0.131898	-11.0664	1.82513e-28	3.78627e-27	0.0104128	246	92.8333	ENSG00000107902	LHPP	phospholysine phosphohistidine inorganic pyrophosphate phosphatase [Source:HGNC Symbol;Acc:HGNC:30042]
ENSG00000108588	7683.93	0.481925	0.04356	11.0635	1.88648e-28	3.90771e-27	0.00167227	5948	8616.67	ENSG00000108588	CCDC47	coiled-coil domain containing 47 [Source:HGNC Symbol;Acc:HGNC:24856]
ENSG00000143549	16291.5	0.280432	0.0253569	11.0594	1.97357e-28	4.08203e-27	0.000550965	13942.7	17571.8	ENSG00000143549	TPM3	tropomyosin 3 [Source:HGNC Symbol;Acc:HGNC:12012]
ENSG00000163820	3185.74	-0.664718	0.0601711	-11.0471	2.26331e-28	4.67437e-27	0.00319422	4130.33	2708	ENSG00000163820	FYCO1	FYVE and coiled-coil domain containing 1 [Source:HGNC Symbol;Acc:HGNC:14673]
ENSG00000177971	1550.16	0.536395	0.0485601	11.046	2.292e-28	4.72662e-27	0.00150351	1166	1754.5	ENSG00000177971	IMP3	IMP3, U3 small nucleolar ribonucleoprotein [Source:HGNC Symbol;Acc:HGNC:14497]
ENSG00000140691	476.883	1.04328	0.0946691	11.0203	3.05145e-28	6.28345e-27	0.00559857	273.333	584.333	ENSG00000140691	ARMC5	armadillo repeat containing 5 [Source:HGNC Symbol;Acc:HGNC:25781]
ENSG00000278463	3458.62	0.688107	0.0624416	11.02	3.06007e-28	6.2919e-27	0.0033858	2406.33	4020.67	ENSG00000278463	HIST1H2AB	histone cluster 1 H2A family member b [Source:HGNC Symbol;Acc:HGNC:4734]
ENSG00000178409	1410.36	0.55998	0.0508629	11.0096	3.43508e-28	7.05256e-27	0.00164107	1047.33	1603.17	ENSG00000178409	BEND3	BEN domain containing 3 [Source:HGNC Symbol;Acc:HGNC:23040]
ENSG00000124374	360.763	-1.00068	0.0909523	-11.0022	3.72841e-28	7.64351e-27	0.00547264	529	274.167	ENSG00000124374	PAIP2B	poly(A) binding protein interacting protein 2B [Source:HGNC Symbol;Acc:HGNC:29200]
ENSG00000182809	326.224	-1.11361	0.101274	-10.996	3.99352e-28	8.17497e-27	0.00711568	497.333	238.5	ENSG00000182809	CRIP2	cysteine rich protein 2 [Source:HGNC Symbol;Acc:HGNC:2361]
ENSG00000243244	122.135	-2.07406	0.188702	-10.9912	4.21284e-28	8.61127e-27	0.0258981	242.667	59.8333	ENSG00000243244	STON1	stonin 1 [Source:HGNC Symbol;Acc:HGNC:17003]
ENSG00000272620	3110.92	0.372941	0.0339332	10.9905	4.24782e-28	8.67004e-27	0.000746406	2542.33	3418.83	ENSG00000272620	AFAP1-AS1	AFAP1 antisense RNA 1 [Source:HGNC Symbol;Acc:HGNC:28141]
ENSG00000257093	1889.1	-0.483061	0.0439732	-10.9854	4.49478e-28	9.16066e-27	0.00136835	2280.33	1693	ENSG00000257093	KIAA1147	KIAA1147 [Source:HGNC Symbol;Acc:HGNC:29472]
ENSG00000071655	3293.59	0.660821	0.0601822	10.9803	4.752e-28	9.67075e-27	0.00310527	2324	3809.5	ENSG00000071655	MBD3	methyl-CpG binding domain protein 3 [Source:HGNC Symbol;Acc:HGNC:6918]
ENSG00000101361	10709	0.869442	0.0791873	10.9796	4.79288e-28	9.7397e-27	0.00590055	6748.67	12809.5	ENSG00000101361	NOP56	NOP56 ribonucleoprotein [Source:HGNC Symbol;Acc:HGNC:15911]
ENSG00000130119	1537.72	0.506688	0.0461495	10.9793	4.80736e-28	9.75487e-27	0.0012858	1174.33	1732.33	ENSG00000130119	GNL3L	G protein nucleolar 3 like [Source:HGNC Symbol;Acc:HGNC:25553]
ENSG00000151276	5106.46	-0.561414	0.0511632	-10.973	5.15288e-28	1.04408e-26	0.00233583	6363	4472	ENSG00000151276	MAGI1	membrane associated guanylate kinase, WW and PDZ domain containing 1 [Source:HGNC Symbol;Acc:HGNC:946]
ENSG00000185344	2373.14	0.47662	0.0434365	10.9728	5.16514e-28	1.04504e-26	0.00132492	1840.33	2658.5	ENSG00000185344	ATP6V0A2	ATPase H+ transporting V0 subunit a2 [Source:HGNC Symbol;Acc:HGNC:18481]
ENSG00000186501	762.008	0.697262	0.0635564	10.9708	5.28253e-28	1.06724e-26	0.00223965	527.333	887.5	ENSG00000186501	TMEM222	transmembrane protein 222 [Source:HGNC Symbol;Acc:HGNC:25363]
ENSG00000182179	519.674	-0.891509	0.0812635	-10.9706	5.29278e-28	1.06776e-26	0.004623	732.667	410.167	ENSG00000182179	UBA7	ubiquitin like modifier activating enzyme 7 [Source:HGNC Symbol;Acc:HGNC:12471]
ENSG00000101384	5408.59	-0.381195	0.0348071	-10.9516	6.5249e-28	1.31442e-26	0.000990638	6260	4987.83	ENSG00000101384	JAG1	jagged 1 [Source:HGNC Symbol;Acc:HGNC:6188]
ENSG00000180957	4481.57	0.40957	0.0374022	10.9504	6.61361e-28	1.33037e-26	0.00109133	3594.67	4956.17	ENSG00000180957	PITPNB	phosphatidylinositol transfer protein beta [Source:HGNC Symbol;Acc:HGNC:9002]
ENSG00000100055	167.314	-1.56551	0.142978	-10.9494	6.69218e-28	1.34423e-26	0.0141207	293.333	102.833	ENSG00000100055	CYTH4	cytohesin 4 [Source:HGNC Symbol;Acc:HGNC:9505]
ENSG00000085365	2380.62	-0.538533	0.0491913	-10.9477	6.81477e-28	1.36688e-26	0.00193922	2939.67	2100.33	ENSG00000085365	SCAMP1	secretory carrier membrane protein 1 [Source:HGNC Symbol;Acc:HGNC:10563]
ENSG00000206503	6560.06	-0.621251	0.0567617	-10.9449	7.0299e-28	1.408e-26	0.00295707	8380.67	5647.67	ENSG00000206503	HLA-A	major histocompatibility complex, class I, A [Source:HGNC Symbol;Acc:HGNC:4931]
ENSG00000131462	5346.23	0.36374	0.0332491	10.9398	7.43358e-28	1.48672e-26	0.000853332	4390.33	5861.33	ENSG00000131462	TUBG1	tubulin gamma 1 [Source:HGNC Symbol;Acc:HGNC:12417]
ENSG00000071242	934.985	-1.409	0.128835	-10.9365	7.71553e-28	1.54089e-26	0.0149776	1562	612.667	ENSG00000071242	RPS6KA2	ribosomal protein S6 kinase A2 [Source:HGNC Symbol;Acc:HGNC:10431]
ENSG00000169926	1639.84	-0.696157	0.0637186	-10.9255	8.70572e-28	1.73615e-26	0.00334957	2154	1380.33	ENSG00000169926	KLF13	Kruppel like factor 13 [Source:HGNC Symbol;Acc:HGNC:13672]
ENSG00000054983	992.876	-1.09136	0.0998982	-10.9247	8.78198e-28	1.74886e-26	0.00868959	1501.33	732.833	ENSG00000054983	GALC	galactosylceramidase [Source:HGNC Symbol;Acc:HGNC:4115]
ENSG00000135338	172.874	-1.48616	0.136188	-10.9126	1.00361e-27	1.99574e-26	0.0125245	296.333	109.5	ENSG00000135338	LCA5	LCA5, lebercilin [Source:HGNC Symbol;Acc:HGNC:31923]
ENSG00000065361	209.593	-1.44968	0.132977	-10.9017	1.13065e-27	2.24517e-26	0.0126405	354.667	135.167	ENSG00000065361	ERBB3	erb-b2 receptor tyrosine kinase 3 [Source:HGNC Symbol;Acc:HGNC:3431]
ENSG00000144043	4794.84	0.545328	0.0500383	10.8982	1.17525e-27	2.33042e-26	0.00215866	3593	5435.5	ENSG00000144043	TEX261	testis expressed 261 [Source:HGNC Symbol;Acc:HGNC:30712]
ENSG00000164889	5775.59	0.702394	0.0644621	10.8962	1.2012e-27	2.37848e-26	0.00377573	3988.33	6725.17	ENSG00000164889	SLC4A2	solute carrier family 4 member 2 [Source:HGNC Symbol;Acc:HGNC:11028]
ENSG00000124313	635.708	-0.85127	0.0781651	-10.8907	1.27713e-27	2.52523e-26	0.00446139	885.667	509.333	ENSG00000124313	IQSEC2	IQ motif and Sec7 domain 2 [Source:HGNC Symbol;Acc:HGNC:29059]
ENSG00000113532	481.554	-0.972967	0.0893545	-10.8888	1.30282e-27	2.57237e-26	0.00581701	699.667	370	ENSG00000113532	ST8SIA4	ST8 alpha-N-acetyl-neuraminide alpha-2,8-sialyltransferase 4 [Source:HGNC Symbol;Acc:HGNC:10871]
ENSG00000115325	1026.76	-0.554063	0.050894	-10.8866	1.33507e-27	2.63232e-26	0.00159575	1275.33	901.5	ENSG00000115325	DOK1	docking protein 1 [Source:HGNC Symbol;Acc:HGNC:2990]
ENSG00000063322	1361.19	0.500531	0.0459826	10.8852	1.35546e-27	2.66875e-26	0.0011743	1043.33	1532	ENSG00000063322	MED29	mediator complex subunit 29 [Source:HGNC Symbol;Acc:HGNC:23074]
ENSG00000099937	123.03	-1.61424	0.148374	-10.8795	1.44329e-27	2.83766e-26	0.0135994	219	74.1667	ENSG00000099937	SERPIND1	serpin family D member 1 [Source:HGNC Symbol;Acc:HGNC:4838]
ENSG00000215251	1513.86	0.513773	0.0472292	10.8783	1.46295e-27	2.87225e-26	0.00136863	1151.33	1706	ENSG00000215251	FASTKD5	FAST kinase domains 5 [Source:HGNC Symbol;Acc:HGNC:25790]
ENSG00000116985	284.657	-1.1305	0.103951	-10.8754	1.51017e-27	2.96078e-26	0.00724245	436	207	ENSG00000116985	BMP8B	bone morphogenetic protein 8b [Source:HGNC Symbol;Acc:HGNC:1075]
ENSG00000164134	6747.88	0.275152	0.0253112	10.8707	1.58895e-27	3.11054e-26	0.00045444	5785.67	7271.67	ENSG00000164134	NAA15	N(alpha)-acetyltransferase 15, NatA auxiliary subunit [Source:HGNC Symbol;Acc:HGNC:30782]
ENSG00000166949	8597.66	-0.668137	0.0614626	-10.8706	1.59102e-27	3.11054e-26	0.00352446	11155.7	7298.17	ENSG00000166949	SMAD3	SMAD family member 3 [Source:HGNC Symbol;Acc:HGNC:6769]
ENSG00000095261	2904.92	0.444047	0.0408584	10.868	1.63824e-27	3.19837e-26	0.00120969	2292.33	3234.33	ENSG00000095261	PSMD5	proteasome 26S subunit, non-ATPase 5 [Source:HGNC Symbol;Acc:HGNC:9563]
ENSG00000136827	1803.9	0.56445	0.0519742	10.8602	1.7833e-27	3.47669e-26	0.00193423	1338.33	2053	ENSG00000136827	TOR1A	torsin family 1 member A [Source:HGNC Symbol;Acc:HGNC:3098]
ENSG00000154079	299.057	-1.11753	0.102931	-10.8571	1.84509e-27	3.59212e-26	0.00719223	456	218.667	ENSG00000154079	SDHAF4	succinate dehydrogenase complex assembly factor 4 [Source:HGNC Symbol;Acc:HGNC:20957]
ENSG00000148690	725.099	-0.682317	0.0628623	-10.8542	1.9055e-27	3.70455e-26	0.00254812	946.333	612.833	ENSG00000148690	FRA10AC1	FRA10A associated CGG repeat 1 [Source:HGNC Symbol;Acc:HGNC:1162]
ENSG00000100345	62771.3	-0.325992	0.0300639	-10.8433	2.14617e-27	4.16663e-26	0.00085342	70962.3	58768.5	ENSG00000100345	MYH9	myosin heavy chain 9 [Source:HGNC Symbol;Acc:HGNC:7579]
ENSG00000141543	6737.39	0.38197	0.0352308	10.8419	2.17822e-27	4.22296e-26	0.00102593	5482	7414.17	ENSG00000141543	EIF4A3	eukaryotic translation initiation factor 4A3 [Source:HGNC Symbol;Acc:HGNC:18683]
ENSG00000116604	2198.32	-0.520809	0.0480416	-10.8408	2.20558e-27	4.26515e-26	0.00179892	2695.33	1949.5	ENSG00000116604	MEF2D	myocyte enhancer factor 2D [Source:HGNC Symbol;Acc:HGNC:6997]
ENSG00000115053	41168.6	0.528176	0.0487213	10.8408	2.20611e-27	4.26515e-26	0.00225233	31085.7	46570	ENSG00000115053	NCL	nucleolin [Source:HGNC Symbol;Acc:HGNC:7667]
ENSG00000106443	2105	0.437891	0.0404244	10.8323	2.41884e-27	4.66994e-26	0.00102705	1665.67	2341.5	ENSG00000106443	PHF14	PHD finger protein 14 [Source:HGNC Symbol;Acc:HGNC:22203]
ENSG00000108829	11474.9	0.401403	0.0370641	10.83	2.48233e-27	4.78588e-26	0.00122152	9250.67	12670.2	ENSG00000108829	LRRC59	leucine rich repeat containing 59 [Source:HGNC Symbol;Acc:HGNC:28817]
ENSG00000167965	1752.67	0.616168	0.0569687	10.8159	2.89434e-27	5.5725e-26	0.00242518	1265.67	2012.5	ENSG00000167965	MLST8	MTOR associated protein, LST8 homolog [Source:HGNC Symbol;Acc:HGNC:24825]
ENSG00000105197	2718.13	0.488732	0.0451931	10.8143	2.94507e-27	5.66235e-26	0.00153473	2095	3052.33	ENSG00000105197	TIMM50	translocase of inner mitochondrial membrane 50 [Source:HGNC Symbol;Acc:HGNC:23656]
ENSG00000073464	5259.86	0.553437	0.0511831	10.8129	2.99153e-27	5.74373e-26	0.00229123	3920	5968.33	ENSG00000073464	CLCN4	chloride voltage-gated channel 4 [Source:HGNC Symbol;Acc:HGNC:2022]
ENSG00000196504	7323.43	0.256315	0.0237358	10.7987	3.49246e-27	6.69628e-26	0.000393673	6338.33	7860.67	ENSG00000196504	PRPF40A	pre-mRNA processing factor 40 homolog A [Source:HGNC Symbol;Acc:HGNC:16463]
ENSG00000155115	1378.2	0.59279	0.054952	10.7874	3.94707e-27	7.55753e-26	0.00202726	1007.33	1576.17	ENSG00000155115	GTF3C6	general transcription factor IIIC subunit 6 [Source:HGNC Symbol;Acc:HGNC:20872]
ENSG00000163412	392.158	-0.860387	0.0797642	-10.7866	3.98118e-27	7.61236e-26	0.00382917	547.333	313	ENSG00000163412	EIF4E3	eukaryotic translation initiation factor 4E family member 3 [Source:HGNC Symbol;Acc:HGNC:31837]
ENSG00000142864	14536.3	0.30471	0.0282509	10.7858	4.01603e-27	7.66848e-26	0.000691426	12285.3	15759.2	ENSG00000142864	SERBP1	SERPINE1 mRNA binding protein 1 [Source:HGNC Symbol;Acc:HGNC:17860]
ENSG00000179950	5149.34	0.506188	0.0469445	10.7827	4.15564e-27	7.92419e-26	0.00189042	3933.67	5796.5	ENSG00000179950	PUF60	poly(U) binding splicing factor 60 [Source:HGNC Symbol;Acc:HGNC:17042]
ENSG00000186577	1238.6	-0.640396	0.059421	-10.7773	4.40842e-27	8.39468e-26	0.00265887	1592.33	1060.17	ENSG00000186577	SMIM29	small integral membrane protein 29 [Source:HGNC Symbol;Acc:HGNC:1340]
ENSG00000122970	688.107	-0.681191	0.0632285	-10.7735	4.59276e-27	8.73378e-26	0.00252531	898.333	581.667	ENSG00000122970	IFT81	intraflagellar transport 81 [Source:HGNC Symbol;Acc:HGNC:14313]
ENSG00000138764	1151.14	-1.01933	0.0946259	-10.7722	4.6556e-27	8.84119e-26	0.00782817	1703	870	ENSG00000138764	CCNG2	cyclin G2 [Source:HGNC Symbol;Acc:HGNC:1593]
ENSG00000103064	1236.57	0.612058	0.0568888	10.7588	5.38446e-27	1.02114e-25	0.00212829	892.667	1418.17	ENSG00000103064	SLC7A6	solute carrier family 7 member 6 [Source:HGNC Symbol;Acc:HGNC:11064]
ENSG00000074370	209.829	-1.63586	0.152089	-10.7559	5.55669e-27	1.05187e-25	0.0177798	375.333	125.167	ENSG00000074370	ATP2A3	ATPase sarcoplasmic/endoplasmic reticulum Ca2+ transporting 3 [Source:HGNC Symbol;Acc:HGNC:813]
ENSG00000163898	1331.13	-1.19938	0.11151	-10.7559	5.56159e-27	1.05187e-25	0.011275	2086.33	944.5	ENSG00000163898	LIPH	lipase H [Source:HGNC Symbol;Acc:HGNC:18483]
ENSG00000173786	6040	0.471619	0.0438484	10.7557	5.57277e-27	1.05255e-25	0.00165603	4697	6755.83	ENSG00000173786	CNP	2',3'-cyclic nucleotide 3' phosphodiesterase [Source:HGNC Symbol;Acc:HGNC:2158]
ENSG00000134247	1053.75	-1.07472	0.100012	-10.7459	6.19403e-27	1.16768e-25	0.00876357	1584.33	781.5	ENSG00000134247	PTGFRN	prostaglandin F2 receptor inhibitor [Source:HGNC Symbol;Acc:HGNC:9601]
ENSG00000215190	216.164	1.35458	0.126056	10.7458	6.1991e-27	1.16768e-25	0.00762405	103.667	275.167	ENSG00000215190	LINC00680	long intergenic non-protein coding RNA 680 [Source:HGNC Symbol;Acc:HGNC:44417]
ENSG00000033011	888.028	0.781955	0.0727963	10.7417	6.4844e-27	1.21977e-25	0.00363689	587	1048	ENSG00000033011	ALG1	ALG1, chitobiosyldiphosphodolichol beta-mannosyltransferase [Source:HGNC Symbol;Acc:HGNC:18294]
ENSG00000149269	2298.8	-0.714838	0.06656	-10.7398	6.62154e-27	1.24388e-25	0.00386398	3040	1924.67	ENSG00000149269	PAK1	p21 (RAC1) activated kinase 1 [Source:HGNC Symbol;Acc:HGNC:8590]
ENSG00000152409	1508.7	-0.613072	0.0571006	-10.7367	6.84372e-27	1.28274e-25	0.00252882	1917	1302.17	ENSG00000152409	JMY	junction mediating and regulatory protein, p53 cofactor [Source:HGNC Symbol;Acc:HGNC:28916]
ENSG00000122687	1235.57	0.641406	0.0597398	10.7367	6.84682e-27	1.28274e-25	0.00243693	880.667	1425	ENSG00000122687	MRM2	mitochondrial rRNA methyltransferase 2 [Source:HGNC Symbol;Acc:HGNC:16352]
ENSG00000033050	4879.37	0.50371	0.0469276	10.7338	7.06565e-27	1.32196e-25	0.00187653	3732.67	5493.33	ENSG00000033050	ABCF2	ATP binding cassette subfamily F member 2 [Source:HGNC Symbol;Acc:HGNC:71]
ENSG00000084444	947.238	-0.833104	0.0776312	-10.7316	7.23603e-27	1.35202e-25	0.00484397	1307.67	763.5	ENSG00000084444	FAM234B	family with sequence similarity 234 member B [Source:HGNC Symbol;Acc:HGNC:29288]
ENSG00000159147	1122.33	0.734394	0.0685627	10.7113	9.01136e-27	1.68148e-25	0.00338611	761	1313.33	ENSG00000159147	DONSON	downstream neighbor of SON [Source:HGNC Symbol;Acc:HGNC:2993]
ENSG00000131196	301.29	-0.91461	0.0853927	-10.7106	9.07382e-27	1.69086e-25	0.00403947	428.667	236.333	ENSG00000131196	NFATC1	nuclear factor of activated T cells 1 [Source:HGNC Symbol;Acc:HGNC:7775]
ENSG00000196227	1249.67	0.566118	0.0528577	10.7102	9.11228e-27	1.69576e-25	0.00172932	925.667	1422.33	ENSG00000196227	FAM217B	family with sequence similarity 217 member B [Source:HGNC Symbol;Acc:HGNC:16170]
ENSG00000107201	4323.16	-0.456576	0.0426346	-10.709	9.23161e-27	1.71568e-25	0.00153186	5156.67	3901.17	ENSG00000107201	DDX58	DExD/H-box helicase 58 [Source:HGNC Symbol;Acc:HGNC:19102]
ENSG00000011566	2782.8	-0.421103	0.039323	-10.7088	9.25147e-27	1.71707e-25	0.0011506	3273.67	2539.17	ENSG00000011566	MAP4K3	mitogen-activated protein kinase kinase kinase kinase 3 [Source:HGNC Symbol;Acc:HGNC:6865]
ENSG00000141279	5249.65	-0.364888	0.0341084	-10.6979	1.04116e-26	1.92983e-25	0.000938657	6033.33	4860.17	ENSG00000141279	NPEPPS	aminopeptidase puromycin sensitive [Source:HGNC Symbol;Acc:HGNC:7900]
ENSG00000204519	552.455	1.00009	0.0935092	10.6951	1.07349e-26	1.9871e-25	0.00584752	324	672.5	ENSG00000204519	ZNF551	zinc finger protein 551 [Source:HGNC Symbol;Acc:HGNC:25108]
ENSG00000126003	3732.13	0.574448	0.0537134	10.6947	1.07782e-26	1.99247e-25	0.00245142	2753.33	4252.67	ENSG00000126003	PLAGL2	PLAG1 like zinc finger 2 [Source:HGNC Symbol;Acc:HGNC:9047]
ENSG00000186868	315.045	-1.1454	0.107175	-10.6872	1.16792e-26	2.15616e-25	0.00819931	485.667	228.167	ENSG00000186868	MAPT	microtubule associated protein tau [Source:HGNC Symbol;Acc:HGNC:6893]
ENSG00000124562	3874.7	0.450483	0.0421641	10.684	1.2089e-26	2.22886e-25	0.00141191	3046.67	4317.67	ENSG00000124562	SNRPC	small nuclear ribonucleoprotein polypeptide C [Source:HGNC Symbol;Acc:HGNC:11157]
ENSG00000063176	611.141	0.757242	0.0708861	10.6825	1.22889e-26	2.26272e-25	0.00273421	409.333	718.5	ENSG00000063176	SPHK2	sphingosine kinase 2 [Source:HGNC Symbol;Acc:HGNC:18859]
ENSG00000010704	364.775	-1.17594	0.11016	-10.6748	1.33491e-26	2.45469e-25	0.00920691	568.333	261.167	ENSG00000010704	HFE	homeostatic iron regulator [Source:HGNC Symbol;Acc:HGNC:4886]
ENSG00000184260	4234.54	0.527681	0.0494424	10.6726	1.36678e-26	2.50998e-25	0.00207067	3201.33	4784.5	ENSG00000184260	HIST2H2AC	histone cluster 2 H2A family member c [Source:HGNC Symbol;Acc:HGNC:4738]
ENSG00000247626	615.686	0.716361	0.0671258	10.6719	1.37745e-26	2.52623e-25	0.00228266	421.333	718.833	ENSG00000247626	MARS2	methionyl-tRNA synthetase 2, mitochondrial [Source:HGNC Symbol;Acc:HGNC:25133]
ENSG00000205213	3678.96	-0.632908	0.0593294	-10.6677	1.44139e-26	2.64002e-25	0.00313505	4718.33	3156.67	ENSG00000205213	LGR4	leucine rich repeat containing G protein-coupled receptor 4 [Source:HGNC Symbol;Acc:HGNC:13299]
ENSG00000164815	875.389	0.588026	0.055129	10.6664	1.46239e-26	2.67496e-25	0.00154635	641.333	1000.33	ENSG00000164815	ORC5	origin recognition complex subunit 5 [Source:HGNC Symbol;Acc:HGNC:8491]
ENSG00000007516	726.831	-1.06813	0.100186	-10.6615	1.5414e-26	2.81578e-25	0.00841576	1088.67	540.833	ENSG00000007516	BAIAP3	BAI1 associated protein 3 [Source:HGNC Symbol;Acc:HGNC:948]
ENSG00000104142	1400.28	0.750533	0.0704173	10.6584	1.59385e-26	2.90778e-25	0.00385264	941.667	1641.83	ENSG00000104142	VPS18	VPS18, CORVET/HOPS core subunit [Source:HGNC Symbol;Acc:HGNC:15972]
ENSG00000057704	1494.15	-0.719162	0.0674946	-10.6551	1.65057e-26	3.00732e-25	0.00377293	1980.33	1248.5	ENSG00000057704	TMCC3	transmembrane and coiled-coil domain family 3 [Source:HGNC Symbol;Acc:HGNC:29199]
ENSG00000132341	19191.6	0.482169	0.0452569	10.654	1.66942e-26	3.03769e-25	0.00190763	14846.3	21517	ENSG00000132341	RAN	RAN, member RAS oncogene family [Source:HGNC Symbol;Acc:HGNC:9846]
ENSG00000228794	506.529	0.777528	0.0729925	10.6522	1.70371e-26	3.09604e-25	0.00257304	335.667	597	ENSG00000228794	LINC01128	long intergenic non-protein coding RNA 1128 [Source:HGNC Symbol;Acc:HGNC:49377]
ENSG00000142192	21996.8	-0.348644	0.0327372	-10.6498	1.74821e-26	3.17275e-25	0.000986937	25111.7	20458.2	ENSG00000142192	APP	amyloid beta precursor protein [Source:HGNC Symbol;Acc:HGNC:620]
ENSG00000101084	1527.4	0.625547	0.0587475	10.6481	1.78042e-26	3.227e-25	0.00251814	1098	1757.67	ENSG00000101084	RAB5IF	RAB5 interacting factor [Source:HGNC Symbol;Acc:HGNC:15870]
ENSG00000182220	1976.28	-0.453922	0.0426549	-10.6417	1.90528e-26	3.44883e-25	0.00127842	2358	1785.83	ENSG00000182220	ATP6AP2	ATPase H+ transporting accessory protein 2 [Source:HGNC Symbol;Acc:HGNC:18305]
ENSG00000274997	5832.07	0.700331	0.0658351	10.6376	1.99096e-26	3.59924e-25	0.00394991	4026.33	6795.33	ENSG00000274997	HIST1H2AH	histone cluster 1 H2A family member h [Source:HGNC Symbol;Acc:HGNC:13671]
ENSG00000210140	1122.17	-1.07134	0.100728	-10.6359	2.02774e-26	3.66098e-25	0.00895353	1685.33	834.833	ENSG00000210140	MT-TC	mitochondrially encoded tRNA cysteine [Source:HGNC Symbol;Acc:HGNC:7477]
ENSG00000186871	1721.49	0.591363	0.0556412	10.6281	2.20461e-26	3.97516e-25	0.00227513	1259.33	1967.33	ENSG00000186871	ERCC6L	ERCC excision repair 6 like, spindle assembly checkpoint helicase [Source:HGNC Symbol;Acc:HGNC:20794]
ENSG00000186088	568.274	-0.887999	0.083558	-10.6273	2.22366e-26	4.00432e-25	0.00513424	801	450	ENSG00000186088	GSAP	gamma-secretase activating protein [Source:HGNC Symbol;Acc:HGNC:28042]
ENSG00000169129	183.917	-1.2832	0.120848	-10.6183	2.44912e-26	4.40463e-25	0.00913909	296.333	126.167	ENSG00000169129	AFAP1L2	actin filament associated protein 1 like 2 [Source:HGNC Symbol;Acc:HGNC:25901]
ENSG00000148730	6328.37	0.527885	0.0497217	10.6168	2.4901e-26	4.47255e-25	0.00218936	4784.33	7152.5	ENSG00000148730	EIF4EBP2	eukaryotic translation initiation factor 4E binding protein 2 [Source:HGNC Symbol;Acc:HGNC:3289]
ENSG00000102316	2621.72	-0.666714	0.0628101	-10.6148	2.5447e-26	4.56472e-25	0.0034449	3404	2227.17	ENSG00000102316	MAGED2	MAGE family member D2 [Source:HGNC Symbol;Acc:HGNC:16353]
ENSG00000123384	1559.28	-1.28731	0.121305	-10.6122	2.61385e-26	4.68273e-25	0.0135621	2517.33	1070.67	ENSG00000123384	LRP1	LDL receptor related protein 1 [Source:HGNC Symbol;Acc:HGNC:6692]
ENSG00000132849	520.631	-0.986408	0.0929748	-10.6094	2.69458e-26	4.82114e-25	0.00659079	759.667	398.333	ENSG00000132849	PATJ	PATJ, crumbs cell polarity complex component [Source:HGNC Symbol;Acc:HGNC:28881]
ENSG00000176463	757.493	-0.599691	0.0565772	-10.5995	2.9949e-26	5.3516e-25	0.00187138	958.667	656.5	ENSG00000176463	SLCO3A1	solute carrier organic anion transporter family member 3A1 [Source:HGNC Symbol;Acc:HGNC:10952]
ENSG00000099953	130.832	-1.64225	0.154995	-10.5955	3.12627e-26	5.5792e-25	0.0159459	234	77.8333	ENSG00000099953	MMP11	matrix metallopeptidase 11 [Source:HGNC Symbol;Acc:HGNC:7157]
ENSG00000115568	1938.16	0.51638	0.0487484	10.5927	3.21994e-26	5.739e-25	0.00167791	1472.33	2187.83	ENSG00000115568	ZNF142	zinc finger protein 142 [Source:HGNC Symbol;Acc:HGNC:12927]
ENSG00000005100	3342.15	0.441418	0.0416937	10.5872	3.41808e-26	6.08437e-25	0.00132779	2637	3718.67	ENSG00000005100	DHX33	DEAH-box helicase 33 [Source:HGNC Symbol;Acc:HGNC:16718]
ENSG00000107874	1172.33	-0.637059	0.0601762	-10.5866	3.43972e-26	6.11506e-25	0.00270379	1504	1003.67	ENSG00000107874	CUEDC2	CUE domain containing 2 [Source:HGNC Symbol;Acc:HGNC:28352]
ENSG00000197261	931.438	-0.829681	0.0784997	-10.5692	4.13892e-26	7.34869e-25	0.00495798	1282.67	751.667	ENSG00000197261	C6orf141	chromosome 6 open reading frame 141 [Source:HGNC Symbol;Acc:HGNC:21351]
ENSG00000090661	256.558	-1.20977	0.114574	-10.5589	4.6229e-26	8.19125e-25	0.00912001	404	181.167	ENSG00000090661	CERS4	ceramide synthase 4 [Source:HGNC Symbol;Acc:HGNC:23747]
ENSG00000116237	7961.92	0.498462	0.0472082	10.5588	4.62523e-26	8.19125e-25	0.00199492	6112	8948.67	ENSG00000116237	ICMT	isoprenylcysteine carboxyl methyltransferase [Source:HGNC Symbol;Acc:HGNC:5350]
ENSG00000181873	319.964	1.21735	0.115297	10.5585	4.64187e-26	8.21028e-25	0.00792697	166.333	401.333	ENSG00000181873	IBA57	IBA57, iron-sulfur cluster assembly [Source:HGNC Symbol;Acc:HGNC:27302]
ENSG00000136450	7968.88	0.428423	0.0405879	10.5554	4.79362e-26	8.46791e-25	0.00143987	6332.33	8846.83	ENSG00000136450	SRSF1	serine and arginine rich splicing factor 1 [Source:HGNC Symbol;Acc:HGNC:10780]
ENSG00000144674	10622.8	-0.328553	0.0311424	-10.55	5.07814e-26	8.95916e-25	0.000842832	12011.7	9937.83	ENSG00000144674	GOLGA4	golgin A4 [Source:HGNC Symbol;Acc:HGNC:4427]
ENSG00000085872	3662.93	0.453381	0.0430563	10.5299	6.28686e-26	1.10776e-24	0.00146755	2874.33	4086.33	ENSG00000085872	CHERP	calcium homeostasis endoplasmic reticulum protein [Source:HGNC Symbol;Acc:HGNC:16930]
ENSG00000104805	2625.49	-0.578523	0.0549468	-10.5288	6.36417e-26	1.11997e-24	0.00255269	3297.33	2289.17	ENSG00000104805	NUCB1	nucleobindin 1 [Source:HGNC Symbol;Acc:HGNC:8043]
ENSG00000078124	2479.53	-0.38169	0.0363015	-10.5145	7.4111e-26	1.30256e-24	0.000887861	2870.33	2286.5	ENSG00000078124	ACER3	alkaline ceramidase 3 [Source:HGNC Symbol;Acc:HGNC:16066]
ENSG00000168538	1016.5	-0.654906	0.0623084	-10.5107	7.71123e-26	1.3536e-24	0.00283736	1313.33	866	ENSG00000168538	TRAPPC11	trafficking protein particle complex 11 [Source:HGNC Symbol;Acc:HGNC:25751]
ENSG00000146094	381.627	1.2785	0.121651	10.5096	7.80334e-26	1.36804e-24	0.0100406	191.333	481.833	ENSG00000146094	DOK3	docking protein 3 [Source:HGNC Symbol;Acc:HGNC:24583]
ENSG00000089280	10863.2	0.487894	0.0464296	10.5083	7.91352e-26	1.38561e-24	0.00196439	8370	12201	ENSG00000089280	FUS	FUS RNA binding protein [Source:HGNC Symbol;Acc:HGNC:4010]
ENSG00000168300	747.952	-0.853677	0.0812415	-10.5079	7.94465e-26	1.38932e-24	0.00514387	1042	598.167	ENSG00000168300	PCMTD1	protein-L-isoaspartate (D-aspartate) O-methyltransferase domain containing 1 [Source:HGNC Symbol;Acc:HGNC:30483]
ENSG00000047230	1267.69	-0.570575	0.0543386	-10.5004	8.60466e-26	1.50285e-24	0.00211514	1585	1108.33	ENSG00000047230	CTPS2	CTP synthase 2 [Source:HGNC Symbol;Acc:HGNC:2520]
ENSG00000243811	344.274	-0.953467	0.0908519	-10.4947	9.13244e-26	1.59303e-24	0.00533642	496.667	266.5	ENSG00000243811	APOBEC3D	apolipoprotein B mRNA editing enzyme catalytic subunit 3D [Source:HGNC Symbol;Acc:HGNC:17354]
ENSG00000126878	1066.05	-0.668734	0.0637389	-10.4918	9.42498e-26	1.642e-24	0.00305309	1383.33	904.5	ENSG00000126878	AIF1L	allograft inflammatory factor 1 like [Source:HGNC Symbol;Acc:HGNC:28904]
ENSG00000146143	2380.01	0.436936	0.0416655	10.4868	9.9377e-26	1.72824e-24	0.00118773	1882.33	2645.17	ENSG00000146143	PRIM2	DNA primase subunit 2 [Source:HGNC Symbol;Acc:HGNC:9370]
ENSG00000101220	2908.62	0.522571	0.0498319	10.4867	9.94481e-26	1.72824e-24	0.00198169	2204	3284.67	ENSG00000101220	C20orf27	chromosome 20 open reading frame 27 [Source:HGNC Symbol;Acc:HGNC:15873]
ENSG00000119596	10955.6	0.473424	0.0451626	10.4827	1.03785e-25	1.80135e-24	0.00185429	8508.67	12269.7	ENSG00000119596	YLPM1	YLP motif containing 1 [Source:HGNC Symbol;Acc:HGNC:17798]
ENSG00000130826	4930	0.680433	0.064942	10.4776	1.09539e-25	1.89885e-24	0.00380021	3439.67	5723.33	ENSG00000130826	DKC1	dyskerin pseudouridine synthase 1 [Source:HGNC Symbol;Acc:HGNC:2890]
ENSG00000076513	2359.84	0.488459	0.0466571	10.4691	1.19741e-25	2.07313e-24	0.00159897	1818	2648.5	ENSG00000076513	ANKRD13A	ankyrin repeat domain 13A [Source:HGNC Symbol;Acc:HGNC:21268]
ENSG00000185721	2151.9	0.53133	0.0507529	10.469	1.19961e-25	2.07435e-24	0.00192691	1624.67	2434	ENSG00000185721	DRG1	developmentally regulated GTP binding protein 1 [Source:HGNC Symbol;Acc:HGNC:3029]
ENSG00000113569	11028.2	0.399061	0.0381341	10.4647	1.25513e-25	2.16766e-24	0.00129492	8892.33	12171.5	ENSG00000113569	NUP155	nucleoporin 155 [Source:HGNC Symbol;Acc:HGNC:8063]
ENSG00000106948	896.022	-0.573882	0.0548822	-10.4566	1.36658e-25	2.35722e-24	0.00187297	1121.67	782	ENSG00000106948	AKNA	AT-hook transcription factor [Source:HGNC Symbol;Acc:HGNC:24108]
ENSG00000115255	231.511	-1.16088	0.111116	-10.4475	1.50454e-25	2.59198e-24	0.00799911	358.333	166.5	ENSG00000115255	REEP6	receptor accessory protein 6 [Source:HGNC Symbol;Acc:HGNC:30078]
ENSG00000108064	6213.97	0.381265	0.0364947	10.4471	1.5103e-25	2.59868e-24	0.00109903	5060.33	6837.83	ENSG00000108064	TFAM	transcription factor A, mitochondrial [Source:HGNC Symbol;Acc:HGNC:11741]
ENSG00000163006	704.272	0.791499	0.0757733	10.4456	1.53464e-25	2.6373e-24	0.00367518	463	831.667	ENSG00000163006	CCDC138	coiled-coil domain containing 138 [Source:HGNC Symbol;Acc:HGNC:26531]
ENSG00000130382	3868.39	0.387592	0.0371094	10.4446	1.55144e-25	2.66289e-24	0.00103234	3139	4261.17	ENSG00000130382	MLLT1	MLLT1, super elongation complex subunit [Source:HGNC Symbol;Acc:HGNC:7134]
ENSG00000099992	335.901	-0.926474	0.0887445	-10.4398	1.63172e-25	2.79724e-24	0.00490692	480.667	262.333	ENSG00000099992	TBC1D10A	TBC1 domain family member 10A [Source:HGNC Symbol;Acc:HGNC:23609]
ENSG00000111602	3121.06	0.384571	0.0368649	10.4319	1.77299e-25	3.03567e-24	0.000945644	2534.67	3436	ENSG00000111602	TIMELESS	timeless circadian regulator [Source:HGNC Symbol;Acc:HGNC:11813]
ENSG00000187091	378.489	-0.925694	0.0887454	-10.4309	1.79195e-25	3.06437e-24	0.0052062	541.333	295.667	ENSG00000187091	PLCD1	phospholipase C delta 1 [Source:HGNC Symbol;Acc:HGNC:9060]
ENSG00000100934	11817	-0.38185	0.0366209	-10.4271	1.86474e-25	3.18493e-24	0.00120923	13673	10892.3	ENSG00000100934	SEC23A	Sec23 homolog A, coat complex II component [Source:HGNC Symbol;Acc:HGNC:10701]
ENSG00000182158	10657.6	-0.562269	0.0539491	-10.4222	1.96338e-25	3.34929e-24	0.00271072	13277.7	9335.33	ENSG00000182158	CREB3L2	cAMP responsive element binding protein 3 like 2 [Source:HGNC Symbol;Acc:HGNC:23720]
ENSG00000145604	3018.56	0.698922	0.0670627	10.4219	1.96942e-25	3.35549e-24	0.00390658	2084.33	3513	ENSG00000145604	SKP2	S-phase kinase associated protein 2 [Source:HGNC Symbol;Acc:HGNC:10901]
ENSG00000100714	13851.4	0.294912	0.028305	10.4191	2.02907e-25	3.45289e-24	0.000690866	11766.3	14984.5	ENSG00000100714	MTHFD1	methylenetetrahydrofolate dehydrogenase, cyclohydrolase and formyltetrahydrofolate synthetase 1 [Source:HGNC Symbol;Acc:HGNC:7432]
ENSG00000126458	716.17	-1.01422	0.097394	-10.4136	2.14962e-25	3.65341e-24	0.00786785	1056	543	ENSG00000126458	RRAS	RAS related [Source:HGNC Symbol;Acc:HGNC:10447]
ENSG00000120093	293.362	-1.16935	0.112292	-10.4135	2.15216e-25	3.65341e-24	0.0090642	454.333	210.167	ENSG00000120093	HOXB3	homeobox B3 [Source:HGNC Symbol;Acc:HGNC:5114]
ENSG00000100216	2862.61	0.432603	0.041567	10.4074	2.2949e-25	3.89098e-24	0.00126144	2269.67	3180.5	ENSG00000100216	TOMM22	translocase of outer mitochondrial membrane 22 [Source:HGNC Symbol;Acc:HGNC:18002]
ENSG00000164172	3241.86	0.373609	0.0359203	10.401	2.45229e-25	4.15278e-24	0.000894202	2648.33	3561.17	ENSG00000164172	MOCS2	molybdenum cofactor synthesis 2 [Source:HGNC Symbol;Acc:HGNC:7193]
ENSG00000080298	846.763	-1.04544	0.100583	-10.3938	2.64542e-25	4.4744e-24	0.00866667	1260.67	635.167	ENSG00000080298	RFX3	regulatory factor X3 [Source:HGNC Symbol;Acc:HGNC:9984]
ENSG00000106976	872.746	-0.875627	0.0842501	-10.3932	2.66322e-25	4.49903e-24	0.00579439	1225	692.5	ENSG00000106976	DNM1	dynamin 1 [Source:HGNC Symbol;Acc:HGNC:2972]
ENSG00000053747	1461.67	-1.18002	0.113567	-10.3906	2.73727e-25	4.61852e-24	0.0117805	2272	1045.33	ENSG00000053747	LAMA3	laminin subunit alpha 3 [Source:HGNC Symbol;Acc:HGNC:6483]
ENSG00000148291	407.077	0.958005	0.0922102	10.3894	2.77216e-25	4.67173e-24	0.00476495	244.333	493.333	ENSG00000148291	SURF2	surfeit 2 [Source:HGNC Symbol;Acc:HGNC:11475]
ENSG00000167291	2936.51	-0.769348	0.0741691	-10.3729	3.29405e-25	5.54451e-24	0.00497942	3964	2416	ENSG00000167291	TBC1D16	TBC1 domain family member 16 [Source:HGNC Symbol;Acc:HGNC:28356]
ENSG00000150347	1335.96	-0.537384	0.0518108	-10.372	3.32368e-25	5.58763e-24	0.00189158	1649.33	1178.33	ENSG00000150347	ARID5B	AT-rich interaction domain 5B [Source:HGNC Symbol;Acc:HGNC:17362]
ENSG00000198203	226.577	-1.16606	0.112447	-10.3699	3.40039e-25	5.7097e-24	0.00820142	351.333	162.833	ENSG00000198203	SULT1C2	sulfotransferase family 1C member 2 [Source:HGNC Symbol;Acc:HGNC:11456]
ENSG00000233237	758.991	0.950557	0.0916845	10.3677	3.47826e-25	5.83342e-24	0.00625584	457	918.167	ENSG00000233237	LINC00472	long intergenic non-protein coding RNA 472 [Source:HGNC Symbol;Acc:HGNC:21380]
ENSG00000120437	5499.11	0.423089	0.0408264	10.3631	3.64777e-25	6.11034e-24	0.00139463	4384.33	6097.67	ENSG00000120437	ACAT2	acetyl-CoA acetyltransferase 2 [Source:HGNC Symbol;Acc:HGNC:94]
ENSG00000196700	2485.26	0.426399	0.0411496	10.3622	3.6849e-25	6.16513e-24	0.00116859	1975.67	2757.33	ENSG00000196700	ZNF512B	zinc finger protein 512B [Source:HGNC Symbol;Acc:HGNC:29212]
ENSG00000013364	3488.25	-0.687866	0.066385	-10.3618	3.70019e-25	6.18326e-24	0.00397509	4570.33	2942.83	ENSG00000013364	MVP	major vault protein [Source:HGNC Symbol;Acc:HGNC:7531]
ENSG00000170873	229.141	-1.27521	0.123087	-10.3602	3.76242e-25	6.27973e-24	0.0106327	367.667	158	ENSG00000170873	MTSS1	MTSS1, I-BAR domain containing [Source:HGNC Symbol;Acc:HGNC:20443]
ENSG00000172819	1665.58	-1.17962	0.113871	-10.3593	3.79687e-25	6.32963e-24	0.0119219	2597	1190.83	ENSG00000172819	RARG	retinoic acid receptor gamma [Source:HGNC Symbol;Acc:HGNC:9866]
ENSG00000125484	3550.98	0.480364	0.0464097	10.3505	4.16244e-25	6.93076e-24	0.00174303	2748.33	3979.33	ENSG00000125484	GTF3C4	general transcription factor IIIC subunit 4 [Source:HGNC Symbol;Acc:HGNC:4667]
ENSG00000164933	2818.71	0.572334	0.0553038	10.3489	4.23237e-25	7.03878e-24	0.00251436	2080.67	3212.5	ENSG00000164933	SLC25A32	solute carrier family 25 member 32 [Source:HGNC Symbol;Acc:HGNC:29683]
ENSG00000175793	3873.55	0.569094	0.054993	10.3485	4.25199e-25	7.06296e-24	0.00259738	2867.33	4408.83	ENSG00000175793	SFN	stratifin [Source:HGNC Symbol;Acc:HGNC:10773]
ENSG00000086589	2936.93	0.564477	0.0545742	10.3433	4.48813e-25	7.44634e-24	0.00245549	2176.67	3339	ENSG00000086589	RBM22	RNA binding motif protein 22 [Source:HGNC Symbol;Acc:HGNC:25503]
ENSG00000176124	294.208	1.05722	0.102235	10.341	4.59523e-25	7.61496e-24	0.00512949	167	361.167	ENSG00000176124	DLEU1	deleted in lymphocytic leukemia 1 [Source:HGNC Symbol;Acc:HGNC:13747]
ENSG00000185477	224.502	-1.7115	0.165511	-10.3407	4.61319e-25	7.63563e-24	0.0221188	411	129.667	ENSG00000185477	GPRIN3	GPRIN family member 3 [Source:HGNC Symbol;Acc:HGNC:27733]
ENSG00000145907	18186.2	0.283575	0.0274276	10.339	4.69255e-25	7.75776e-24	0.000662904	15532	19628.5	ENSG00000145907	G3BP1	G3BP stress granule assembly factor 1 [Source:HGNC Symbol;Acc:HGNC:30292]
ENSG00000113522	3151.64	-0.463251	0.0448483	-10.3293	5.19438e-25	8.57719e-24	0.00163843	3772	2842.67	ENSG00000113522	RAD50	RAD50 double strand break repair protein [Source:HGNC Symbol;Acc:HGNC:9816]
ENSG00000163683	468.1	-1.13216	0.109615	-10.3285	5.23996e-25	8.6422e-24	0.00963526	718.667	339.667	ENSG00000163683	SMIM14	small integral membrane protein 14 [Source:HGNC Symbol;Acc:HGNC:27321]
ENSG00000171307	3224.28	0.572979	0.0555127	10.3216	5.62898e-25	9.27282e-24	0.00258992	2382	3672.67	ENSG00000171307	ZDHHC16	zinc finger DHHC-type containing 16 [Source:HGNC Symbol;Acc:HGNC:20714]
ENSG00000158528	766.453	-0.786278	0.0762144	-10.3167	5.9244e-25	9.74795e-24	0.00440849	1041.67	627.167	ENSG00000158528	PPP1R9A	protein phosphatase 1 regulatory subunit 9A [Source:HGNC Symbol;Acc:HGNC:14946]
ENSG00000131043	2296.38	0.437686	0.042485	10.3021	6.89173e-25	1.13262e-23	0.00123645	1816	2554.33	ENSG00000131043	AAR2	AAR2 splicing factor homolog [Source:HGNC Symbol;Acc:HGNC:15886]
ENSG00000130706	6251.14	0.529244	0.0513988	10.2968	7.28324e-25	1.19555e-23	0.00234992	4722.67	7064.33	ENSG00000130706	ADRM1	adhesion regulating molecule 1 [Source:HGNC Symbol;Acc:HGNC:15759]
ENSG00000137574	1367.22	0.58713	0.0571285	10.2774	8.91339e-25	1.46142e-23	0.00225652	1003	1563	ENSG00000137574	TGS1	trimethylguanosine synthase 1 [Source:HGNC Symbol;Acc:HGNC:17843]
ENSG00000204592	7831.85	-0.479533	0.0467062	-10.267	9.92218e-25	1.6249e-23	0.00197799	9442.33	7027.67	ENSG00000204592	HLA-E	major histocompatibility complex, class I, E [Source:HGNC Symbol;Acc:HGNC:4962]
ENSG00000135929	337.142	-1.02756	0.100143	-10.2609	1.05736e-24	1.72955e-23	0.00698936	500	254.667	ENSG00000135929	CYP27A1	cytochrome P450 family 27 subfamily A member 1 [Source:HGNC Symbol;Acc:HGNC:2605]
ENSG00000040275	4089.61	0.446564	0.0435221	10.2606	1.06024e-24	1.73222e-23	0.00153965	3219.33	4555.67	ENSG00000040275	SPDL1	spindle apparatus coiled-coil protein 1 [Source:HGNC Symbol;Acc:HGNC:26010]
ENSG00000197037	604.285	0.785548	0.0766369	10.2503	1.18024e-24	1.92601e-23	0.00350252	399	713.5	ENSG00000197037	ZSCAN25	zinc finger and SCAN domain containing 25 [Source:HGNC Symbol;Acc:HGNC:21961]
ENSG00000163468	12881.6	0.337466	0.0329276	10.2487	1.19901e-24	1.95436e-23	0.000955809	10719.7	14052.7	ENSG00000163468	CCT3	chaperonin containing TCP1 subunit 3 [Source:HGNC Symbol;Acc:HGNC:1616]
ENSG00000106344	3364.21	0.416511	0.0406575	10.2444	1.25424e-24	2.04199e-23	0.00125079	2688.33	3728.17	ENSG00000106344	RBM28	RNA binding motif protein 28 [Source:HGNC Symbol;Acc:HGNC:21863]
ENSG00000124243	742.461	-0.683181	0.0666898	-10.2442	1.25718e-24	2.04438e-23	0.00305368	968.667	627.167	ENSG00000124243	BCAS4	breast carcinoma amplified sequence 4 [Source:HGNC Symbol;Acc:HGNC:14367]
ENSG00000151779	3748.98	-0.352211	0.034387	-10.2426	1.27814e-24	2.07605e-23	0.000884778	4284.33	3485.33	ENSG00000151779	NBAS	neuroblastoma amplified sequence [Source:HGNC Symbol;Acc:HGNC:15625]
ENSG00000163697	5746.57	-0.402148	0.0392792	-10.2382	1.33725e-24	2.16952e-23	0.00131972	6706.67	5271.5	ENSG00000163697	APBB2	amyloid beta precursor protein binding family B member 2 [Source:HGNC Symbol;Acc:HGNC:582]
ENSG00000126368	510.019	-1.05	0.102607	-10.2331	1.40868e-24	2.28275e-23	0.00836614	763	382	ENSG00000126368	NR1D1	nuclear receptor subfamily 1 group D member 1 [Source:HGNC Symbol;Acc:HGNC:7962]
ENSG00000106261	3027.84	-0.463627	0.0453083	-10.2327	1.41497e-24	2.29028e-23	0.00166623	3621.67	2729	ENSG00000106261	ZKSCAN1	zinc finger with KRAB and SCAN domains 1 [Source:HGNC Symbol;Acc:HGNC:13101]
ENSG00000139726	7307.35	0.342862	0.0335173	10.2294	1.46395e-24	2.36459e-23	0.000927591	6065.33	7980.33	ENSG00000139726	DENR	density regulated re-initiation and release factor [Source:HGNC Symbol;Acc:HGNC:2769]
ENSG00000178401	332.029	-0.929138	0.0908302	-10.2294	1.46428e-24	2.36459e-23	0.00523596	475.333	259.167	ENSG00000178401	DNAJC22	DnaJ heat shock protein family (Hsp40) member C22 [Source:HGNC Symbol;Acc:HGNC:25802]
ENSG00000168264	1452.63	-0.530656	0.0518787	-10.2288	1.47382e-24	2.37723e-23	0.00195321	1789	1285.17	ENSG00000168264	IRF2BP2	interferon regulatory factor 2 binding protein 2 [Source:HGNC Symbol;Acc:HGNC:21729]
ENSG00000152455	1204.96	0.718148	0.0702496	10.2228	1.56746e-24	2.52535e-23	0.00369514	824.333	1406.83	ENSG00000152455	SUV39H2	suppressor of variegation 3-9 homolog 2 [Source:HGNC Symbol;Acc:HGNC:17287]
ENSG00000176170	1004	0.683817	0.0669261	10.2175	1.65556e-24	2.6642e-23	0.00306344	699	1165.67	ENSG00000176170	SPHK1	sphingosine kinase 1 [Source:HGNC Symbol;Acc:HGNC:11240]
ENSG00000092931	634.252	0.734965	0.0719368	10.2168	1.66716e-24	2.67978e-23	0.00297105	429.667	742.333	ENSG00000092931	MFSD11	major facilitator superfamily domain containing 11 [Source:HGNC Symbol;Acc:HGNC:25458]
ENSG00000170348	16536.6	-0.310601	0.0304523	-10.1996	1.99112e-24	3.19682e-23	0.000833679	18578	15542.3	ENSG00000170348	TMED10	transmembrane p24 trafficking protein 10 [Source:HGNC Symbol;Acc:HGNC:16998]
ENSG00000264364	3887.05	0.3683	0.0361173	10.1973	2.03804e-24	3.26838e-23	0.000965682	3184.33	4266.33	ENSG00000264364	DYNLL2	dynein light chain LC8-type 2 [Source:HGNC Symbol;Acc:HGNC:24596]
ENSG00000167535	272.569	-1.07799	0.1058	-10.1889	2.22243e-24	3.55998e-23	0.00747743	409.667	201.667	ENSG00000167535	CACNB3	calcium voltage-gated channel auxiliary subunit beta 3 [Source:HGNC Symbol;Acc:HGNC:1403]
ENSG00000166783	2730.76	-0.601489	0.0590409	-10.1877	2.25127e-24	3.60203e-23	0.00301533	3457	2364.33	ENSG00000166783	MARF1	meiosis regulator and mRNA stability factor 1 [Source:HGNC Symbol;Acc:HGNC:29562]
ENSG00000274523	2009.41	0.494347	0.048535	10.1854	2.30508e-24	3.68389e-23	0.00168375	1545.33	2258	ENSG00000274523	RCC1L	RCC1 like [Source:HGNC Symbol;Acc:HGNC:14948]
ENSG00000204525	5023.29	-0.701864	0.0689509	-10.1792	2.45603e-24	3.92064e-23	0.0043883	6619.33	4219.5	ENSG00000204525	HLA-C	major histocompatibility complex, class I, C [Source:HGNC Symbol;Acc:HGNC:4933]
ENSG00000138756	2210.57	0.438288	0.0430583	10.179	2.46203e-24	3.92571e-23	0.00126416	1748	2459.17	ENSG00000138756	BMP2K	BMP2 inducible kinase [Source:HGNC Symbol;Acc:HGNC:18041]
ENSG00000187957	145.097	1.5837	0.155612	10.1772	2.50626e-24	3.99167e-23	0.0105526	61	189.5	ENSG00000187957	DNER	delta/notch like EGF repeat containing [Source:HGNC Symbol;Acc:HGNC:24456]
ENSG00000074211	933.042	-0.59535	0.0585054	-10.176	2.53826e-24	4.03802e-23	0.0023106	1178.33	809.667	ENSG00000074211	PPP2R2C	protein phosphatase 2 regulatory subunit Bgamma [Source:HGNC Symbol;Acc:HGNC:9306]
ENSG00000124789	10111.8	0.299051	0.029402	10.1711	2.66866e-24	4.2406e-23	0.000722353	8571.67	10946.8	ENSG00000124789	NUP153	nucleoporin 153 [Source:HGNC Symbol;Acc:HGNC:8062]
ENSG00000156374	1370.46	0.457403	0.0449731	10.1706	2.68238e-24	4.25756e-23	0.00110386	1073	1530	ENSG00000156374	PCGF6	polycomb group ring finger 6 [Source:HGNC Symbol;Acc:HGNC:21156]
ENSG00000151012	11591.8	0.72143	0.0709416	10.1693	2.71726e-24	4.30801e-23	0.00472698	7917	13541.7	ENSG00000151012	SLC7A11	solute carrier family 7 member 11 [Source:HGNC Symbol;Acc:HGNC:11059]
ENSG00000115526	738.516	0.701784	0.0690442	10.1643	2.86261e-24	4.53328e-23	0.00288282	509	859.5	ENSG00000115526	CHST10	carbohydrate sulfotransferase 10 [Source:HGNC Symbol;Acc:HGNC:19650]
ENSG00000099194	74154.4	-0.530586	0.0522205	-10.1605	2.97576e-24	4.70438e-23	0.00260796	91355.3	65552	ENSG00000099194	SCD	stearoyl-CoA desaturase [Source:HGNC Symbol;Acc:HGNC:10571]
ENSG00000100612	1010.99	-0.643894	0.0633727	-10.1604	2.97741e-24	4.70438e-23	0.00296034	1302	865	ENSG00000100612	DHRS7	dehydrogenase/reductase 7 [Source:HGNC Symbol;Acc:HGNC:21524]
ENSG00000115414	14130.6	-0.680227	0.0669588	-10.1589	3.02488e-24	4.77396e-23	0.00424408	18468.7	11956.7	ENSG00000115414	FN1	fibronectin 1 [Source:HGNC Symbol;Acc:HGNC:3778]
ENSG00000141524	6684.78	-0.384315	0.0378319	-10.1585	3.03754e-24	4.78851e-23	0.00123496	7748.67	6160	ENSG00000141524	TMC6	transmembrane channel like 6 [Source:HGNC Symbol;Acc:HGNC:18021]
ENSG00000185621	1138.48	-0.522013	0.0513928	-10.1573	3.07388e-24	4.84032e-23	0.00172937	1395.33	1009.17	ENSG00000185621	LMLN	leishmanolysin like peptidase [Source:HGNC Symbol;Acc:HGNC:15991]
ENSG00000179403	418.463	-0.856801	0.0843639	-10.156	3.11576e-24	4.90071e-23	0.00469871	584	334.833	ENSG00000179403	VWA1	von Willebrand factor A domain containing 1 [Source:HGNC Symbol;Acc:HGNC:30910]
ENSG00000101109	7871.63	0.330117	0.032506	10.1556	3.12991e-24	4.91743e-23	0.000874864	6570	8573.83	ENSG00000101109	STK4	serine/threonine kinase 4 [Source:HGNC Symbol;Acc:HGNC:11408]
ENSG00000167461	3294.74	0.382766	0.0377009	10.1527	3.22341e-24	5.05861e-23	0.00102472	2679.67	3624.67	ENSG00000167461	RAB8A	RAB8A, member RAS oncogene family [Source:HGNC Symbol;Acc:HGNC:7007]
ENSG00000271605	552.767	-0.656493	0.064743	-10.14	3.67174e-24	5.7557e-23	0.00238558	714.667	470.5	ENSG00000271605	MILR1	mast cell immunoglobulin like receptor 1 [Source:HGNC Symbol;Acc:HGNC:27570]
ENSG00000176533	167.259	-1.13451	0.111905	-10.1382	3.73834e-24	5.85352e-23	0.00669005	257	121.5	ENSG00000176533	GNG7	G protein subunit gamma 7 [Source:HGNC Symbol;Acc:HGNC:4410]
ENSG00000120318	3310.1	-0.317029	0.0312723	-10.1377	3.75821e-24	5.87801e-23	0.000653275	3726	3105.17	ENSG00000120318	ARAP3	ArfGAP with RhoGAP domain, ankyrin repeat and PH domain 3 [Source:HGNC Symbol;Acc:HGNC:24097]
ENSG00000084774	12719.1	0.368406	0.0363509	10.1347	3.87531e-24	6.05435e-23	0.00118176	10412.3	13967.2	ENSG00000084774	CAD	carbamoyl-phosphate synthetase 2, aspartate transcarbamylase, and dihydroorotase [Source:HGNC Symbol;Acc:HGNC:1424]
ENSG00000008513	3834.44	-1.0195	0.100806	-10.1135	4.81329e-24	7.51132e-23	0.00953171	5670.67	2901.33	ENSG00000008513	ST3GAL1	ST3 beta-galactoside alpha-2,3-sialyltransferase 1 [Source:HGNC Symbol;Acc:HGNC:10862]
ENSG00000116688	7434.44	0.348144	0.0344476	10.1065	5.17206e-24	8.06215e-23	0.000990701	6153	8126	ENSG00000116688	MFN2	mitofusin 2 [Source:HGNC Symbol;Acc:HGNC:16877]
ENSG00000171824	4676.51	0.4172	0.0412854	10.1053	5.23502e-24	8.15117e-23	0.0013949	3737.33	5182.17	ENSG00000171824	EXOSC10	exosome component 10 [Source:HGNC Symbol;Acc:HGNC:9138]
ENSG00000105639	58.6395	-2.97241	0.294211	-10.103	5.35701e-24	8.3318e-23	0.0599217	137	18.1667	ENSG00000105639	JAK3	Janus kinase 3 [Source:HGNC Symbol;Acc:HGNC:6193]
ENSG00000006744	5381.5	0.428591	0.0424488	10.0967	5.71529e-24	8.87911e-23	0.00151955	4277.67	5974.17	ENSG00000006744	ELAC2	elaC ribonuclease Z 2 [Source:HGNC Symbol;Acc:HGNC:14198]
ENSG00000142945	5947.7	0.345145	0.0342115	10.0886	6.20695e-24	9.63219e-23	0.00093792	4931	6497.83	ENSG00000142945	KIF2C	kinesin family member 2C [Source:HGNC Symbol;Acc:HGNC:6393]
ENSG00000175283	652.497	0.737165	0.0730924	10.0854	6.41108e-24	9.93788e-23	0.00318695	442	764.5	ENSG00000175283	DOLK	dolichol kinase [Source:HGNC Symbol;Acc:HGNC:23406]
ENSG00000121579	6311.2	0.46245	0.0458601	10.0839	6.50626e-24	1.00742e-22	0.00183822	4929.33	7051	ENSG00000121579	NAA50	N(alpha)-acetyltransferase 50, NatE catalytic subunit [Source:HGNC Symbol;Acc:HGNC:29533]
ENSG00000139438	188.676	1.63903	0.162616	10.0792	6.83065e-24	1.05647e-22	0.0153476	76.6667	247.167	ENSG00000139438	FAM222A	family with sequence similarity 222 member A [Source:HGNC Symbol;Acc:HGNC:25915]
ENSG00000048649	4272.32	-0.405486	0.0402497	-10.0742	7.18072e-24	1.10939e-22	0.00133783	4994.67	3915	ENSG00000048649	RSF1	remodeling and spacing factor 1 [Source:HGNC Symbol;Acc:HGNC:18118]
ENSG00000231312	385.315	-1.25376	0.124463	-10.0733	7.24902e-24	1.1187e-22	0.0125537	613	268.167	ENSG00000231312	MAP4K3-DT	MAP4K3 divergent transcript [Source:HGNC Symbol;Acc:HGNC:54056]
ENSG00000032219	2282.74	-0.390016	0.0387192	-10.0729	7.27811e-24	1.12194e-22	0.00103	2649.67	2100.17	ENSG00000032219	ARID4A	AT-rich interaction domain 4A [Source:HGNC Symbol;Acc:HGNC:9885]
ENSG00000178104	821.5	-0.694632	0.0689665	-10.072	7.34595e-24	1.13115e-22	0.00346876	1075.67	691.5	ENSG00000178104	PDE4DIP	phosphodiesterase 4D interacting protein [Source:HGNC Symbol;Acc:HGNC:15580]
ENSG00000116584	5914	-0.469532	0.0466616	-10.0625	8.09192e-24	1.24464e-22	0.00193546	7101.33	5323.5	ENSG00000116584	ARHGEF2	Rho/Rac guanine nucleotide exchange factor 2 [Source:HGNC Symbol;Acc:HGNC:682]
ENSG00000040531	994.512	0.514122	0.0510945	10.0622	8.1182e-24	1.2473e-22	0.00132956	756.667	1121.83	ENSG00000040531	CTNS	cystinosin, lysosomal cystine transporter [Source:HGNC Symbol;Acc:HGNC:2518]
ENSG00000100441	2473.05	-0.577091	0.0573593	-10.061	8.21741e-24	1.26115e-22	0.00279144	3095.67	2155.5	ENSG00000100441	KHNYN	KH and NYN domain containing [Source:HGNC Symbol;Acc:HGNC:20166]
ENSG00000112984	6697.75	0.581177	0.0578187	10.0517	9.02758e-24	1.38396e-22	0.00303306	4930	7638.5	ENSG00000112984	KIF20A	kinesin family member 20A [Source:HGNC Symbol;Acc:HGNC:9787]
ENSG00000140459	280.305	-1.34021	0.133338	-10.0512	9.07407e-24	1.38956e-22	0.0138611	459	188.667	ENSG00000140459	CYP11A1	cytochrome P450 family 11 subfamily A member 1 [Source:HGNC Symbol;Acc:HGNC:2590]
ENSG00000116649	3840.54	0.625158	0.0621982	10.0511	9.08867e-24	1.39027e-22	0.00339986	2758	4416.67	ENSG00000116649	SRM	spermidine synthase [Source:HGNC Symbol;Acc:HGNC:11296]
ENSG00000132824	13969.5	-0.285462	0.0284102	-10.0479	9.38658e-24	1.43426e-22	0.000707334	15526.7	13215.3	ENSG00000132824	SERINC3	serine incorporator 3 [Source:HGNC Symbol;Acc:HGNC:11699]
ENSG00000135040	2361.63	0.372578	0.0370867	10.0461	9.55558e-24	1.45848e-22	0.000847419	1930.33	2594.17	ENSG00000135040	NAA35	N(alpha)-acetyltransferase 35, NatC auxiliary subunit [Source:HGNC Symbol;Acc:HGNC:24340]
ENSG00000100162	862.331	0.693868	0.0690736	10.0453	9.63221e-24	1.46857e-22	0.00313469	597	1002	ENSG00000100162	CENPM	centromere protein M [Source:HGNC Symbol;Acc:HGNC:18352]
ENSG00000123144	5500.26	0.500909	0.0498884	10.0406	1.01063e-23	1.53917e-22	0.00217922	4215.67	6187.5	ENSG00000123144	TRIR	telomerase RNA component interacting RNase [Source:HGNC Symbol;Acc:HGNC:28424]
ENSG00000198795	1008.84	0.591634	0.0589823	10.0307	1.11702e-23	1.69933e-22	0.00214869	737.333	1152.83	ENSG00000198795	ZNF521	zinc finger protein 521 [Source:HGNC Symbol;Acc:HGNC:24605]
ENSG00000090889	3073.49	0.544812	0.0543294	10.0279	1.14897e-23	1.74603e-22	0.00245059	2303.33	3483.33	ENSG00000090889	KIF4A	kinesin family member 4A [Source:HGNC Symbol;Acc:HGNC:13339]
ENSG00000136718	1815.16	0.567109	0.0565647	10.0258	1.17347e-23	1.78132e-22	0.0024164	1344	2066	ENSG00000136718	IMP4	IMP4, U3 small nucleolar ribonucleoprotein [Source:HGNC Symbol;Acc:HGNC:30856]
ENSG00000113643	6342	0.355149	0.0354864	10.008	1.40526e-23	2.13085e-22	0.00103437	5228.67	6941.33	ENSG00000113643	RARS	arginyl-tRNA synthetase [Source:HGNC Symbol;Acc:HGNC:9870]
ENSG00000189410	909.912	0.844336	0.0844118	10.0026	1.48473e-23	2.24891e-22	0.00539093	579.667	1083	ENSG00000189410	SH2D5	SH2 domain containing 5 [Source:HGNC Symbol;Acc:HGNC:28819]
ENSG00000006652	2224.18	0.428594	0.0428721	9.99702	1.57055e-23	2.3763e-22	0.00125349	1765.67	2469	ENSG00000006652	IFRD1	interferon related developmental regulator 1 [Source:HGNC Symbol;Acc:HGNC:5456]
ENSG00000123636	1017.16	-0.516241	0.0516711	-9.99091	1.67044e-23	2.52471e-22	0.00165999	1244.33	903.333	ENSG00000123636	BAZ2B	bromodomain adjacent to zinc finger domain 2B [Source:HGNC Symbol;Acc:HGNC:963]
ENSG00000106366	18605.2	-0.692105	0.0692897	-9.98856	1.7104e-23	2.5823e-22	0.00456472	24370	15683.3	ENSG00000106366	SERPINE1	serpin family E member 1 [Source:HGNC Symbol;Acc:HGNC:8583]
ENSG00000166311	1028.17	-0.612869	0.0613581	-9.9884	1.71318e-23	2.58368e-22	0.00273134	1309	887.833	ENSG00000166311	SMPD1	sphingomyelin phosphodiesterase 1 [Source:HGNC Symbol;Acc:HGNC:11120]
ENSG00000159128	1426.91	-0.662076	0.0663122	-9.98423	1.78677e-23	2.69176e-22	0.00358947	1850.33	1212.83	ENSG00000159128	IFNGR2	interferon gamma receptor 2 [Source:HGNC Symbol;Acc:HGNC:5440]
ENSG00000240602	230.166	1.85574	0.185887	9.98318	1.8059e-23	2.71764e-22	0.0239771	82	307.5	ENSG00000240602	AADACP1	arylacetamide deacetylase pseudogene 1 [Source:HGNC Symbol;Acc:HGNC:50305]
ENSG00000162711	808.209	-0.799076	0.0800617	-9.98075	1.85064e-23	2.78195e-22	0.00504713	1101.33	657.333	ENSG00000162711	NLRP3	NLR family pyrin domain containing 3 [Source:HGNC Symbol;Acc:HGNC:16400]
ENSG00000112715	4987.48	-1.22063	0.122328	-9.97838	1.8954e-23	2.84617e-22	0.0141992	7886.67	3512.33	ENSG00000112715	VEGFA	vascular endothelial growth factor A [Source:HGNC Symbol;Acc:HGNC:12680]
ENSG00000005700	4821.33	-0.547921	0.0549233	-9.97613	1.93889e-23	2.90833e-22	0.00270823	5970.33	4242.33	ENSG00000005700	IBTK	inhibitor of Bruton tyrosine kinase [Source:HGNC Symbol;Acc:HGNC:17853]
ENSG00000111615	2899.56	0.385866	0.0386874	9.97395	1.98187e-23	2.96961e-22	0.00105027	2353	3192.83	ENSG00000111615	KRR1	KRR1, small subunit processome component homolog [Source:HGNC Symbol;Acc:HGNC:5176]
ENSG00000163811	6716.82	0.658417	0.0660384	9.97023	2.05762e-23	3.07979e-22	0.00400682	4741.33	7769.67	ENSG00000163811	WDR43	WD repeat domain 43 [Source:HGNC Symbol;Acc:HGNC:28945]
ENSG00000171943	1323.25	-0.503155	0.0504728	-9.96884	2.08659e-23	3.1198e-22	0.00175063	1610.33	1179.33	ENSG00000171943	SRGAP2C	SLIT-ROBO Rho GTPase activating protein 2C [Source:HGNC Symbol;Acc:HGNC:30584]
ENSG00000164976	833.823	-0.751914	0.075429	-9.96851	2.09354e-23	3.12683e-22	0.00438635	1117.67	689.5	ENSG00000164976	MYORG	myogenesis regulating glycosidase (putative) [Source:HGNC Symbol;Acc:HGNC:19918]
ENSG00000165119	30122.1	0.388932	0.0390608	9.95709	2.34825e-23	3.5035e-22	0.00142871	24431	33176.3	ENSG00000165119	HNRNPK	heterogeneous nuclear ribonucleoprotein K [Source:HGNC Symbol;Acc:HGNC:5044]
ENSG00000118515	1267.56	0.555129	0.0557615	9.95542	2.38819e-23	3.55928e-22	0.00204944	944.667	1439.67	ENSG00000118515	SGK1	serum/glucocorticoid regulated kinase 1 [Source:HGNC Symbol;Acc:HGNC:10810]
ENSG00000108509	2459.02	-0.589112	0.0591952	-9.95202	2.47107e-23	3.67886e-22	0.00299547	3093.67	2138.83	ENSG00000108509	CAMTA2	calmodulin binding transcription activator 2 [Source:HGNC Symbol;Acc:HGNC:18807]
ENSG00000107957	5276.31	-0.557573	0.0560283	-9.95163	2.48077e-23	3.68935e-22	0.00284265	6569.67	4627.67	ENSG00000107957	SH3PXD2A	SH3 and PX domains 2A [Source:HGNC Symbol;Acc:HGNC:23664]
ENSG00000134516	659.903	-1.23505	0.124133	-9.94942	2.53661e-23	3.76836e-22	0.0134464	1046.33	462.5	ENSG00000134516	DOCK2	dedicator of cytokinesis 2 [Source:HGNC Symbol;Acc:HGNC:2988]
ENSG00000005007	8922.33	0.384189	0.03864	9.94278	2.71163e-23	4.02408e-22	0.00130866	7249	9823	ENSG00000005007	UPF1	UPF1, RNA helicase and ATPase [Source:HGNC Symbol;Acc:HGNC:9962]
ENSG00000112343	1909.92	-0.496033	0.0499387	-9.93283	2.99616e-23	4.44159e-22	0.00191279	2317.67	1705.33	ENSG00000112343	TRIM38	tripartite motif containing 38 [Source:HGNC Symbol;Acc:HGNC:10059]
ENSG00000160633	5182.08	0.377489	0.0380066	9.93219	3.01545e-23	4.46543e-22	0.00117153	4225.67	5699	ENSG00000160633	SAFB	scaffold attachment factor B [Source:HGNC Symbol;Acc:HGNC:10520]
ENSG00000182134	796.753	-0.633266	0.0637802	-9.92888	3.11742e-23	4.61153e-22	0.00276727	1020.67	683.667	ENSG00000182134	TDRKH	tudor and KH domain containing [Source:HGNC Symbol;Acc:HGNC:11713]
ENSG00000114554	9518.84	-0.435097	0.0438378	-9.92516	3.23581e-23	4.78158e-22	0.00174879	11270.7	8647.67	ENSG00000114554	PLXNA1	plexin A1 [Source:HGNC Symbol;Acc:HGNC:9099]
ENSG00000165244	1487.67	0.71943	0.0725389	9.91786	3.48133e-23	5.13893e-22	0.00420765	1016.33	1736.17	ENSG00000165244	ZNF367	zinc finger protein 367 [Source:HGNC Symbol;Acc:HGNC:18320]
ENSG00000120217	574.985	-0.944728	0.0952587	-9.9175	3.49383e-23	5.15192e-22	0.00716494	825	446.5	ENSG00000120217	CD274	CD274 molecule [Source:HGNC Symbol;Acc:HGNC:17635]
ENSG00000124571	6599.35	0.387245	0.039058	9.91461	3.59659e-23	5.29783e-22	0.00129536	5355.33	7270.5	ENSG00000124571	XPO5	exportin 5 [Source:HGNC Symbol;Acc:HGNC:17675]
ENSG00000065923	3932.02	-0.69887	0.0704914	-9.91426	3.60934e-23	5.311e-22	0.00454469	5172	3307.83	ENSG00000065923	SLC9A7	solute carrier family 9 member A7 [Source:HGNC Symbol;Acc:HGNC:17123]
ENSG00000082497	1127.96	0.95018	0.0958502	9.91318	3.64847e-23	5.3629e-22	0.00760244	680.333	1362.5	ENSG00000082497	SERTAD4	SERTA domain containing 4 [Source:HGNC Symbol;Acc:HGNC:25236]
ENSG00000162105	749.57	-0.729505	0.0736006	-9.91167	3.70402e-23	5.43881e-22	0.00400139	996.333	624.667	ENSG00000162105	SHANK2	SH3 and multiple ankyrin repeat domains 2 [Source:HGNC Symbol;Acc:HGNC:14295]
ENSG00000204257	96.8824	-1.56057	0.157479	-9.9097	3.7777e-23	5.54115e-22	0.0142985	169.333	59.6667	ENSG00000204257	HLA-DMA	major histocompatibility complex, class II, DM alpha [Source:HGNC Symbol;Acc:HGNC:4934]
ENSG00000170860	3153.53	0.622307	0.0628312	9.90442	3.98263e-23	5.83561e-22	0.00340713	2268.67	3622.33	ENSG00000170860	LSM3	LSM3 homolog, U6 small nuclear RNA and mRNA degradation associated [Source:HGNC Symbol;Acc:HGNC:17874]
ENSG00000135074	3880.8	-0.67355	0.068026	-9.90137	4.10602e-23	6.01008e-22	0.004213	5060.67	3285.83	ENSG00000135074	ADAM19	ADAM metallopeptidase domain 19 [Source:HGNC Symbol;Acc:HGNC:197]
ENSG00000163947	686.019	-0.567309	0.0572989	-9.90088	4.12623e-23	6.03331e-22	0.00182006	856.667	600	ENSG00000163947	ARHGEF3	Rho guanine nucleotide exchange factor 3 [Source:HGNC Symbol;Acc:HGNC:683]
ENSG00000153832	147.728	-1.34364	0.135721	-9.89997	4.16388e-23	6.08197e-22	0.0115824	242	99.1667	ENSG00000153832	FBXO36	F-box protein 36 [Source:HGNC Symbol;Acc:HGNC:27020]
ENSG00000156853	776.404	0.625253	0.0631773	9.89681	4.29765e-23	6.27079e-22	0.00226493	557.333	892.333	ENSG00000156853	ZNF689	zinc finger protein 689 [Source:HGNC Symbol;Acc:HGNC:25173]
ENSG00000128965	674.463	-0.987224	0.0997663	-9.89537	4.3601e-23	6.35525e-22	0.00823978	982.667	516.167	ENSG00000128965	CHAC1	ChaC glutathione specific gamma-glutamylcyclotransferase 1 [Source:HGNC Symbol;Acc:HGNC:28680]
ENSG00000161888	2096.01	0.385471	0.0390149	9.88012	5.07722e-23	7.39278e-22	0.000926132	1702.33	2307.5	ENSG00000161888	SPC24	SPC24, NDC80 kinetochore complex component [Source:HGNC Symbol;Acc:HGNC:26913]
ENSG00000087086	51455.3	0.513871	0.052013	9.87966	5.10073e-23	7.41925e-22	0.00257679	39180.7	58025.8	ENSG00000087086	FTL	ferritin light chain [Source:HGNC Symbol;Acc:HGNC:3999]
ENSG00000151923	7475.52	0.251768	0.0255212	9.86506	5.89997e-23	8.57282e-22	0.000481365	6484.33	8015.83	ENSG00000151923	TIAL1	TIA1 cytotoxic granule associated RNA binding protein like 1 [Source:HGNC Symbol;Acc:HGNC:11804]
ENSG00000137393	1078.24	0.646278	0.0655289	9.86249	6.05296e-23	8.78594e-22	0.00298676	766	1243.83	ENSG00000137393	RNF144B	ring finger protein 144B [Source:HGNC Symbol;Acc:HGNC:21578]
ENSG00000163597	8509.61	0.375461	0.0380731	9.86159	6.10724e-23	8.8555e-22	0.00126112	6943	9351.5	ENSG00000163597	SNHG16	small nucleolar RNA host gene 16 [Source:HGNC Symbol;Acc:HGNC:44352]
ENSG00000105612	1114.34	-0.801026	0.0812418	-9.85978	6.21875e-23	9.00781e-22	0.00553587	1522.67	907.167	ENSG00000105612	DNASE2	deoxyribonuclease 2, lysosomal [Source:HGNC Symbol;Acc:HGNC:2960]
ENSG00000062822	2184.39	0.399329	0.0405097	9.8576	6.35497e-23	9.19555e-22	0.00105974	1760	2411.33	ENSG00000062822	POLD1	DNA polymerase delta 1, catalytic subunit [Source:HGNC Symbol;Acc:HGNC:9175]
ENSG00000143322	11220.7	0.612561	0.062177	9.85189	6.72667e-23	9.72329e-22	0.00360664	8099.33	12876.7	ENSG00000143322	ABL2	ABL proto-oncogene 2, non-receptor tyrosine kinase [Source:HGNC Symbol;Acc:HGNC:77]
ENSG00000165458	5704.99	-0.444537	0.0451392	-9.84814	6.98249e-23	1.00826e-21	0.00179487	6775	5168.33	ENSG00000165458	INPPL1	inositol polyphosphate phosphatase like 1 [Source:HGNC Symbol;Acc:HGNC:6080]
ENSG00000176208	3395.85	0.79887	0.0811301	9.84677	7.07792e-23	1.02098e-21	0.00594159	2222.33	4014.83	ENSG00000176208	ATAD5	ATPase family, AAA domain containing 5 [Source:HGNC Symbol;Acc:HGNC:25752]
ENSG00000113013	25314.6	0.372469	0.0378436	9.84233	7.39749e-23	1.06597e-21	0.00133189	20691.7	27807.5	ENSG00000113013	HSPA9	heat shock protein family A (Hsp70) member 9 [Source:HGNC Symbol;Acc:HGNC:5244]
ENSG00000157933	4941.11	0.440248	0.0447331	9.84167	7.4464e-23	1.07191e-21	0.00169116	3906.33	5498.17	ENSG00000157933	SKI	SKI proto-oncogene [Source:HGNC Symbol;Acc:HGNC:10896]
ENSG00000099817	4901.4	0.383936	0.03904	9.83443	8.00175e-23	1.15067e-21	0.00123517	3986	5393.83	ENSG00000099817	POLR2E	RNA polymerase II subunit E [Source:HGNC Symbol;Acc:HGNC:9192]
ENSG00000101182	10864.2	0.372219	0.0378657	9.82998	8.36373e-23	1.20148e-21	0.00127465	8885.33	11934.8	ENSG00000101182	PSMA7	proteasome subunit alpha 7 [Source:HGNC Symbol;Acc:HGNC:9536]
ENSG00000069869	7481.96	0.415768	0.0423064	9.82754	8.56897e-23	1.22969e-21	0.00156806	5984	8281.67	ENSG00000069869	NEDD4	neural precursor cell expressed, developmentally down-regulated 4, E3 ubiquitin protein ligase [Source:HGNC Symbol;Acc:HGNC:7727]
ENSG00000156273	5592.26	-0.618545	0.0629772	-9.82174	9.07628e-23	1.30115e-21	0.00364813	7122	4818.5	ENSG00000156273	BACH1	BTB domain and CNC homolog 1 [Source:HGNC Symbol;Acc:HGNC:935]
ENSG00000139990	2977.76	-0.371098	0.0377842	-9.82152	9.09624e-23	1.30267e-21	0.00105616	3431	2752.83	ENSG00000139990	DCAF5	DDB1 and CUL4 associated factor 5 [Source:HGNC Symbol;Acc:HGNC:20224]
ENSG00000128607	1886.6	-0.398448	0.0406265	-9.80758	1.04439e-22	1.49413e-21	0.00108989	2198.67	1731.83	ENSG00000128607	KLHDC10	kelch domain containing 10 [Source:HGNC Symbol;Acc:HGNC:22194]
ENSG00000141385	4589.66	0.424452	0.0432884	9.80521	1.06925e-22	1.52812e-21	0.00155249	3653	5088.83	ENSG00000141385	AFG3L2	AFG3 like matrix AAA peptidase subunit 2 [Source:HGNC Symbol;Acc:HGNC:315]
ENSG00000091409	13156.6	-0.742573	0.0757379	-9.80451	1.07664e-22	1.53711e-21	0.00544342	17593	10914.5	ENSG00000091409	ITGA6	integrin subunit alpha 6 [Source:HGNC Symbol;Acc:HGNC:6142]
ENSG00000165060	938.199	0.602694	0.0615139	9.79769	1.15192e-22	1.6429e-21	0.00234703	681.667	1074.83	ENSG00000165060	FXN	frataxin [Source:HGNC Symbol;Acc:HGNC:3951]
ENSG00000163814	18565.1	-0.950521	0.097027	-9.79646	1.16598e-22	1.66126e-21	0.00899805	26788	14385.7	ENSG00000163814	CDCP1	CUB domain containing protein 1 [Source:HGNC Symbol;Acc:HGNC:24357]
ENSG00000125450	3627.06	0.364871	0.037269	9.7902	1.24054e-22	1.76568e-21	0.00102657	2974.67	3977.17	ENSG00000125450	NUP85	nucleoporin 85 [Source:HGNC Symbol;Acc:HGNC:8734]
ENSG00000124120	3270.45	0.388475	0.0397123	9.78223	1.34214e-22	1.90833e-21	0.00117118	2652.67	3601.83	ENSG00000124120	TTPAL	alpha tocopherol transfer protein like [Source:HGNC Symbol;Acc:HGNC:16114]
ENSG00000152270	596.763	0.697211	0.0712765	9.78179	1.34809e-22	1.91483e-21	0.00278541	413	695.167	ENSG00000152270	PDE3B	phosphodiesterase 3B [Source:HGNC Symbol;Acc:HGNC:8779]
ENSG00000136167	17317.6	-0.667445	0.0682418	-9.7806	1.36401e-22	1.93548e-21	0.0044225	22500	14705	ENSG00000136167	LCP1	lymphocyte cytosolic protein 1 [Source:HGNC Symbol;Acc:HGNC:6528]
ENSG00000104823	905.021	-1.09628	0.112092	-9.78016	1.36989e-22	1.94184e-21	0.0110861	1372.33	666.5	ENSG00000104823	ECH1	enoyl-CoA hydratase 1 [Source:HGNC Symbol;Acc:HGNC:3149]
ENSG00000094880	2840.3	0.348274	0.0356142	9.77907	1.38476e-22	1.96092e-21	0.000827381	2348.67	3104.83	ENSG00000094880	CDC23	cell division cycle 23 [Source:HGNC Symbol;Acc:HGNC:1724]
ENSG00000187098	2898.71	0.536338	0.0548465	9.77889	1.3872e-22	1.96238e-21	0.00248275	2178	3280.33	ENSG00000187098	MITF	melanocyte inducing transcription factor [Source:HGNC Symbol;Acc:HGNC:7105]
ENSG00000041802	2809.91	0.397158	0.0406156	9.77846	1.39313e-22	1.96877e-21	0.0011834	2269.33	3099.83	ENSG00000041802	LSG1	large 60S subunit nuclear export GTPase 1 [Source:HGNC Symbol;Acc:HGNC:25652]
ENSG00000162063	2556.25	0.482497	0.0493482	9.7774	1.40774e-22	1.98739e-21	0.00188598	1975	2865.67	ENSG00000162063	CCNF	cyclin F [Source:HGNC Symbol;Acc:HGNC:1591]
ENSG00000073910	177.673	-1.05047	0.107447	-9.77661	1.41889e-22	2.00112e-21	0.00606905	265	133	ENSG00000073910	FRY	FRY microtubule binding protein [Source:HGNC Symbol;Acc:HGNC:20367]
ENSG00000163481	706.146	0.586224	0.059972	9.77495	1.44229e-22	2.03205e-21	0.00175345	517.333	806.5	ENSG00000163481	RNF25	ring finger protein 25 [Source:HGNC Symbol;Acc:HGNC:14662]
ENSG00000163516	1336.58	-0.626588	0.0641037	-9.77461	1.44719e-22	2.03689e-21	0.00326736	1704.67	1147.67	ENSG00000163516	ANKZF1	ankyrin repeat and zinc finger domain containing 1 [Source:HGNC Symbol;Acc:HGNC:25527]
ENSG00000113456	2123.77	0.352255	0.0360549	9.76997	1.51502e-22	2.13021e-21	0.00072512	1753.33	2323.67	ENSG00000113456	RAD1	RAD1 checkpoint DNA exonuclease [Source:HGNC Symbol;Acc:HGNC:9806]
ENSG00000147475	2512.93	-0.501798	0.0513952	-9.76351	1.61461e-22	2.26795e-21	0.00217091	3054.67	2241.33	ENSG00000147475	ERLIN2	ER lipid raft associated 2 [Source:HGNC Symbol;Acc:HGNC:1356]
ENSG00000116406	2770.79	-0.532458	0.0545822	-9.75515	1.75344e-22	2.46047e-21	0.00253084	3411.33	2447	ENSG00000116406	EDEM3	ER degradation enhancing alpha-mannosidase like protein 3 [Source:HGNC Symbol;Acc:HGNC:16787]
ENSG00000142634	6764.34	-0.441711	0.0452954	-9.75178	1.81256e-22	2.54086e-21	0.00183392	8031	6136.83	ENSG00000142634	EFHD2	EF-hand domain family member D2 [Source:HGNC Symbol;Acc:HGNC:28670]
ENSG00000055332	6158.38	-0.398113	0.0408268	-9.75128	1.8215e-22	2.55083e-21	0.00144964	7172.33	5654.17	ENSG00000055332	EIF2AK2	eukaryotic translation initiation factor 2 alpha kinase 2 [Source:HGNC Symbol;Acc:HGNC:9437]
ENSG00000198356	2942.1	0.545709	0.0559813	9.74806	1.88024e-22	2.63045e-21	0.00260836	2205	3336.67	ENSG00000198356	ASNA1	arsA arsenite transporter, ATP-binding, homolog 1 (bacterial) [Source:HGNC Symbol;Acc:HGNC:752]
ENSG00000054965	3527.81	-0.326463	0.0334944	-9.74679	1.90399e-22	2.661e-21	0.000809688	3989	3302.67	ENSG00000054965	FAM168A	family with sequence similarity 168 member A [Source:HGNC Symbol;Acc:HGNC:28999]
ENSG00000007384	1402.06	-0.466413	0.0478608	-9.74518	1.93432e-22	2.70068e-21	0.00153987	1680	1262.67	ENSG00000007384	RHBDF1	rhomboid 5 homolog 1 [Source:HGNC Symbol;Acc:HGNC:20561]
ENSG00000113615	3552.05	-0.34239	0.0351417	-9.74313	1.97384e-22	2.7531e-21	0.000920814	4040.67	3309.67	ENSG00000113615	SEC24A	SEC24 homolog A, COPII coat complex component [Source:HGNC Symbol;Acc:HGNC:10703]
ENSG00000174282	3077.8	-0.442771	0.0454505	-9.74184	1.99901e-22	2.78541e-21	0.00168274	3653	2789.17	ENSG00000174282	ZBTB4	zinc finger and BTB domain containing 4 [Source:HGNC Symbol;Acc:HGNC:23847]
ENSG00000150961	4019.17	-0.662689	0.0680285	-9.74135	2.0087e-22	2.79611e-21	0.00422116	5209	3415.17	ENSG00000150961	SEC24D	SEC24 homolog D, COPII coat complex component [Source:HGNC Symbol;Acc:HGNC:10706]
ENSG00000107937	5768.92	0.397056	0.0407691	9.73913	2.05311e-22	2.85507e-21	0.00140144	4651.33	6367	ENSG00000107937	GTPBP4	GTP binding protein 4 [Source:HGNC Symbol;Acc:HGNC:21535]
ENSG00000103365	2946.67	0.416535	0.0427974	9.73273	2.18654e-22	3.03759e-21	0.00137451	2354	3262.67	ENSG00000103365	GGA2	golgi associated, gamma adaptin ear containing, ARF binding protein 2 [Source:HGNC Symbol;Acc:HGNC:16064]
ENSG00000142409	1312.32	0.539158	0.0554046	9.73129	2.21756e-22	3.07762e-21	0.00204829	985.333	1487	ENSG00000142409	ZNF787	zinc finger protein 787 [Source:HGNC Symbol;Acc:HGNC:26998]
ENSG00000057608	12870.8	0.337878	0.0347406	9.72574	2.34189e-22	3.24692e-21	0.00107361	10710.3	14041.2	ENSG00000057608	GDI2	GDP dissociation inhibitor 2 [Source:HGNC Symbol;Acc:HGNC:4227]
ENSG00000147231	83.8671	1.96084	0.201619	9.72546	2.34834e-22	3.25263e-21	0.0122974	28	113.167	ENSG00000147231	RADX	RPA1 related single stranded DNA binding protein, X-linked [Source:HGNC Symbol;Acc:HGNC:25486]
ENSG00000162073	673.752	0.736403	0.0757694	9.71901	2.50191e-22	3.46189e-21	0.00363176	457	789	ENSG00000162073	PAQR4	progestin and adipoQ receptor family member 4 [Source:HGNC Symbol;Acc:HGNC:26386]
ENSG00000143369	1406.22	-0.496186	0.0510579	-9.71811	2.52422e-22	3.48929e-21	0.00184833	1707.33	1256.17	ENSG00000143369	ECM1	extracellular matrix protein 1 [Source:HGNC Symbol;Acc:HGNC:3153]
ENSG00000214706	3600.74	0.460359	0.0473719	9.71797	2.52759e-22	3.49048e-21	0.00183638	2815	4021.83	ENSG00000214706	IFRD2	interferon related developmental regulator 2 [Source:HGNC Symbol;Acc:HGNC:5457]
ENSG00000163932	1949.24	-0.61617	0.0634085	-9.71748	2.53995e-22	3.50408e-21	0.00339589	2480.33	1679.5	ENSG00000163932	PRKCD	protein kinase C delta [Source:HGNC Symbol;Acc:HGNC:9399]
ENSG00000112365	804.838	0.590229	0.0607929	9.70884	2.76459e-22	3.81021e-21	0.00205546	589	919.833	ENSG00000112365	ZBTB24	zinc finger and BTB domain containing 24 [Source:HGNC Symbol;Acc:HGNC:21143]
ENSG00000160214	1348.54	0.603917	0.062224	9.70554	2.85553e-22	3.93165e-21	0.00282325	980	1545.5	ENSG00000160214	RRP1	ribosomal RNA processing 1 [Source:HGNC Symbol;Acc:HGNC:18785]
ENSG00000127399	1450.5	0.600125	0.0618794	9.69831	3.06533e-22	4.21634e-21	0.00284623	1055.67	1660.17	ENSG00000127399	LRRC61	leucine rich repeat containing 61 [Source:HGNC Symbol;Acc:HGNC:21704]
ENSG00000110066	1167.44	-0.574356	0.0592308	-9.69691	3.1076e-22	4.27026e-21	0.00258726	1461.33	1019.33	ENSG00000110066	KMT5B	lysine methyltransferase 5B [Source:HGNC Symbol;Acc:HGNC:24283]
ENSG00000198589	5203.2	-0.534885	0.0551667	-9.69579	3.14182e-22	4.31304e-21	0.00274769	6414.33	4596.67	ENSG00000198589	LRBA	LPS responsive beige-like anchor protein [Source:HGNC Symbol;Acc:HGNC:1742]
ENSG00000068489	8939.22	0.3201	0.0330151	9.69555	3.14948e-22	4.31929e-21	0.00092407	7500	9719.83	ENSG00000068489	PRR11	proline rich 11 [Source:HGNC Symbol;Acc:HGNC:25619]
ENSG00000095002	4957.54	0.463007	0.047761	9.69426	3.18949e-22	4.36985e-21	0.0019593	3870	5536.67	ENSG00000095002	MSH2	mutS homolog 2 [Source:HGNC Symbol;Acc:HGNC:7325]
ENSG00000131389	11237.1	-0.410997	0.0424081	-9.69146	3.2781e-22	4.48684e-21	0.00164498	13171.7	10277.5	ENSG00000131389	SLC6A6	solute carrier family 6 member 6 [Source:HGNC Symbol;Acc:HGNC:11052]
ENSG00000099899	1141.01	0.763968	0.0788302	9.69131	3.28295e-22	4.48906e-21	0.00484629	761.333	1342.67	ENSG00000099899	TRMT2A	tRNA methyltransferase 2 homolog A [Source:HGNC Symbol;Acc:HGNC:24974]
ENSG00000100664	9682.03	0.621986	0.0641857	9.69041	3.31204e-22	4.52439e-21	0.00383293	6977.67	11122	ENSG00000100664	EIF5	eukaryotic translation initiation factor 5 [Source:HGNC Symbol;Acc:HGNC:3299]
ENSG00000108826	1496	0.481589	0.0497019	9.68955	3.34009e-22	4.55824e-21	0.00159815	1156.33	1676.83	ENSG00000108826	MRPL27	mitochondrial ribosomal protein L27 [Source:HGNC Symbol;Acc:HGNC:14483]
ENSG00000184436	673.903	0.612412	0.0632049	9.68932	3.34763e-22	4.56405e-21	0.00203836	487.333	773.5	ENSG00000184436	THAP7	THAP domain containing 7 [Source:HGNC Symbol;Acc:HGNC:23190]
ENSG00000170369	330.804	-2.13325	0.220169	-9.68913	3.3537e-22	4.56786e-21	0.0434632	669.333	157.5	ENSG00000170369	CST2	cystatin SA [Source:HGNC Symbol;Acc:HGNC:2474]
ENSG00000162775	3404.8	0.480022	0.0495438	9.68884	3.36325e-22	4.57638e-21	0.00201801	2634.33	3816.67	ENSG00000162775	RBM15	RNA binding motif protein 15 [Source:HGNC Symbol;Acc:HGNC:14959]
ENSG00000072778	7597.88	-0.471183	0.0486397	-9.68721	3.41736e-22	4.64547e-21	0.00215135	9110.67	6835.17	ENSG00000072778	ACADVL	acyl-CoA dehydrogenase very long chain [Source:HGNC Symbol;Acc:HGNC:92]
ENSG00000131558	1966.55	-0.438166	0.0452425	-9.68483	3.49783e-22	4.75023e-21	0.00149361	2330.33	1785.33	ENSG00000131558	EXOC4	exocyst complex component 4 [Source:HGNC Symbol;Acc:HGNC:30389]
ENSG00000166548	1032.7	-0.587732	0.0606977	-9.68294	3.5633e-22	4.83442e-21	0.00265548	1302	898.167	ENSG00000166548	TK2	thymidine kinase 2, mitochondrial [Source:HGNC Symbol;Acc:HGNC:11831]
ENSG00000099337	377.312	-0.850801	0.0878994	-9.67925	3.69405e-22	5.00693e-21	0.00504884	525	302	ENSG00000099337	KCNK6	potassium two pore domain channel subfamily K member 6 [Source:HGNC Symbol;Acc:HGNC:6281]
ENSG00000197579	2441.01	0.43722	0.0451918	9.67478	3.85934e-22	5.22587e-21	0.00149402	1932	2713.17	ENSG00000197579	TOPORS	TOP1 binding arginine/serine rich protein [Source:HGNC Symbol;Acc:HGNC:21653]
ENSG00000073536	1851.37	0.538618	0.0556764	9.67408	3.88577e-22	5.25655e-21	0.00233984	1391	2098	ENSG00000073536	NLE1	notchless homolog 1 [Source:HGNC Symbol;Acc:HGNC:19889]
ENSG00000197905	1813.36	0.604816	0.0626024	9.66124	4.40498e-22	5.95314e-21	0.00309828	1316	2077.33	ENSG00000197905	TEAD4	TEA domain transcription factor 4 [Source:HGNC Symbol;Acc:HGNC:11717]
ENSG00000085117	3089.86	-0.849655	0.0879532	-9.66031	4.44523e-22	6.00171e-21	0.00714319	4306	2473.5	ENSG00000085117	CD82	CD82 molecule [Source:HGNC Symbol;Acc:HGNC:6210]
ENSG00000148019	2451.12	0.614665	0.0636348	9.65926	4.49095e-22	6.05756e-21	0.00339547	1771	2813	ENSG00000148019	CEP78	centrosomal protein 78 [Source:HGNC Symbol;Acc:HGNC:25740]
ENSG00000170468	1847.82	0.473863	0.04908	9.65492	4.68506e-22	6.31327e-21	0.00168845	1435.67	2068.83	ENSG00000170468	RIOX1	ribosomal oxygenase 1 [Source:HGNC Symbol;Acc:HGNC:20968]
ENSG00000135679	4920.25	0.294448	0.0305006	9.65386	4.73389e-22	6.3729e-21	0.000671631	4181.33	5323.83	ENSG00000135679	MDM2	MDM2 proto-oncogene [Source:HGNC Symbol;Acc:HGNC:6973]
ENSG00000104147	406.215	0.823135	0.0853641	9.64264	5.2813e-22	7.10297e-21	0.00376988	262.667	482.167	ENSG00000104147	OIP5	Opa interacting protein 5 [Source:HGNC Symbol;Acc:HGNC:20300]
ENSG00000135624	17331.7	0.350794	0.036386	9.6409	5.37145e-22	7.21723e-21	0.00120798	14324.7	18952.5	ENSG00000135624	CCT7	chaperonin containing TCP1 subunit 7 [Source:HGNC Symbol;Acc:HGNC:1622]
ENSG00000148459	603.358	0.886155	0.0919342	9.63901	5.4713e-22	7.34431e-21	0.00588986	377.333	723	ENSG00000148459	PDSS1	decaprenyl diphosphate synthase subunit 1 [Source:HGNC Symbol;Acc:HGNC:17759]
ENSG00000075711	9476.27	-0.558355	0.057929	-9.6386	5.493e-22	7.36634e-21	0.00312782	11772.3	8306.17	ENSG00000075711	DLG1	discs large MAGUK scaffold protein 1 [Source:HGNC Symbol;Acc:HGNC:2900]
ENSG00000103479	1392.2	-0.690043	0.0716099	-9.63614	5.62664e-22	7.53828e-21	0.00427715	1819	1173.5	ENSG00000103479	RBL2	RB transcriptional corepressor like 2 [Source:HGNC Symbol;Acc:HGNC:9894]
ENSG00000154319	281.529	-1.05934	0.109993	-9.63096	5.91741e-22	7.92023e-21	0.00845378	421.667	210	ENSG00000154319	FAM167A	family with sequence similarity 167 member A [Source:HGNC Symbol;Acc:HGNC:15549]
ENSG00000154065	315.556	-1.17326	0.121882	-9.62617	6.1998e-22	8.29023e-21	0.0114372	489.667	226	ENSG00000154065	ANKRD29	ankyrin repeat domain 29 [Source:HGNC Symbol;Acc:HGNC:27110]
ENSG00000100029	3858.16	0.57082	0.0593032	9.62544	6.24365e-22	8.34085e-21	0.00306935	2852.67	4396.83	ENSG00000100029	PES1	pescadillo ribosomal biogenesis factor 1 [Source:HGNC Symbol;Acc:HGNC:8848]
ENSG00000188266	109.398	-1.25516	0.13042	-9.62396	6.33416e-22	8.45365e-21	0.00813563	174.667	76	ENSG00000188266	HYKK	hydroxylysine kinase [Source:HGNC Symbol;Acc:HGNC:34403]
ENSG00000155189	1601.94	0.44964	0.0467242	9.62328	6.37627e-22	8.5017e-21	0.00138125	1259	1786.17	ENSG00000155189	AGPAT5	1-acylglycerol-3-phosphate O-acyltransferase 5 [Source:HGNC Symbol;Acc:HGNC:20886]
ENSG00000109066	1583.03	0.478622	0.0497538	9.61982	6.59484e-22	8.78363e-21	0.00164659	1227.33	1773.83	ENSG00000109066	TMEM104	transmembrane protein 104 [Source:HGNC Symbol;Acc:HGNC:25984]
ENSG00000114779	1388.35	-0.484121	0.0503259	-9.61973	6.60034e-22	8.78363e-21	0.00176735	1674	1243.83	ENSG00000114779	ABHD14B	abhydrolase domain containing 14B [Source:HGNC Symbol;Acc:HGNC:28235]
ENSG00000009954	9893.94	0.450035	0.0468098	9.61412	6.97029e-22	9.26709e-21	0.00198943	7780.33	11027.2	ENSG00000009954	BAZ1B	bromodomain adjacent to zinc finger domain 1B [Source:HGNC Symbol;Acc:HGNC:961]
ENSG00000151532	1268.6	0.638449	0.0664191	9.61243	7.08573e-22	9.41158e-21	0.00327332	905.333	1461.5	ENSG00000151532	VTI1A	vesicle transport through interaction with t-SNAREs 1A [Source:HGNC Symbol;Acc:HGNC:17792]
ENSG00000136937	2996.9	0.442726	0.0460618	9.61157	7.14538e-22	9.48176e-21	0.0016565	2363.33	3336	ENSG00000136937	NCBP1	nuclear cap binding protein subunit 1 [Source:HGNC Symbol;Acc:HGNC:7658]
ENSG00000178718	1592.2	0.624528	0.0649848	9.61038	7.22834e-22	9.58271e-21	0.00329236	1145.67	1830.33	ENSG00000178718	RPP25	ribonuclease P and MRP subunit p25 [Source:HGNC Symbol;Acc:HGNC:30361]
ENSG00000143457	886.535	-0.59055	0.0614657	-9.60781	7.41085e-22	9.81532e-21	0.00259982	1117.33	769.833	ENSG00000143457	GOLPH3L	golgi phosphoprotein 3 like [Source:HGNC Symbol;Acc:HGNC:24882]
ENSG00000163161	2549.38	0.344747	0.0358877	9.60625	7.5237e-22	9.95531e-21	0.000802017	2112	2785.5	ENSG00000163161	ERCC3	ERCC excision repair 3, TFIIH core complex helicase subunit [Source:HGNC Symbol;Acc:HGNC:3435]
ENSG00000136026	12880.4	-0.439868	0.0457926	-9.60564	7.56884e-22	1.00055e-20	0.00194273	15278	11687.8	ENSG00000136026	CKAP4	cytoskeleton associated protein 4 [Source:HGNC Symbol;Acc:HGNC:16991]
ENSG00000110318	640.02	-0.977166	0.101797	-9.59917	8.05935e-22	1.06439e-20	0.00856194	931	492	ENSG00000110318	CEP126	centrosomal protein 126 [Source:HGNC Symbol;Acc:HGNC:29264]
ENSG00000107738	577.354	-1.0928	0.113846	-9.59898	8.07414e-22	1.06533e-20	0.0109065	874	425.5	ENSG00000107738	VSIR	V-set immunoregulatory receptor [Source:HGNC Symbol;Acc:HGNC:30085]
ENSG00000001084	1668.36	0.431585	0.044966	9.59804	8.14823e-22	1.07408e-20	0.00125885	1324	1852.67	ENSG00000001084	GCLC	glutamate-cysteine ligase catalytic subunit [Source:HGNC Symbol;Acc:HGNC:4311]
ENSG00000183196	129.633	-1.77789	0.185289	-9.59523	8.37314e-22	1.10269e-20	0.0256267	240.333	72.8333	ENSG00000183196	CHST6	carbohydrate sulfotransferase 6 [Source:HGNC Symbol;Acc:HGNC:6938]
ENSG00000113790	315.975	-0.934496	0.0974105	-9.59338	8.52461e-22	1.12157e-20	0.00628897	452.333	246.167	ENSG00000113790	EHHADH	enoyl-CoA hydratase and 3-hydroxyacyl CoA dehydrogenase [Source:HGNC Symbol;Acc:HGNC:3247]
ENSG00000143126	2411.01	-0.57706	0.0601576	-9.59246	8.60109e-22	1.13057e-20	0.00309797	3021.67	2104.17	ENSG00000143126	CELSR2	cadherin EGF LAG seven-pass G-type receptor 2 [Source:HGNC Symbol;Acc:HGNC:3231]
ENSG00000186812	377.789	-0.783688	0.0817113	-9.59094	8.72882e-22	1.14628e-20	0.00403487	511.667	309.167	ENSG00000186812	ZNF397	zinc finger protein 397 [Source:HGNC Symbol;Acc:HGNC:18818]
ENSG00000118564	2148.42	-0.428748	0.0447104	-9.58944	8.85674e-22	1.16198e-20	0.00148705	2535.67	1954.33	ENSG00000118564	FBXL5	F-box and leucine rich repeat protein 5 [Source:HGNC Symbol;Acc:HGNC:13602]
ENSG00000122779	1603.85	0.593149	0.0618829	9.58501	9.24486e-22	1.21176e-20	0.00292814	1171.67	1833.17	ENSG00000122779	TRIM24	tripartite motif containing 24 [Source:HGNC Symbol;Acc:HGNC:11812]
ENSG00000167513	2432.25	0.759512	0.0792455	9.58429	9.3094e-22	1.21907e-20	0.00550743	1629.33	2857.83	ENSG00000167513	CDT1	chromatin licensing and DNA replication factor 1 [Source:HGNC Symbol;Acc:HGNC:24576]
ENSG00000171155	1011.64	-0.558817	0.0583341	-9.57959	9.74337e-22	1.2747e-20	0.00236366	1259.67	886.5	ENSG00000171155	C1GALT1C1	C1GALT1 specific chaperone 1 [Source:HGNC Symbol;Acc:HGNC:24338]
ENSG00000004799	192.43	-2.05287	0.214388	-9.5755	1.01365e-21	1.32488e-20	0.0389127	381.667	95.1667	ENSG00000004799	PDK4	pyruvate dehydrogenase kinase 4 [Source:HGNC Symbol;Acc:HGNC:8812]
ENSG00000117597	2088.75	0.468803	0.0489628	9.57467	1.02186e-21	1.33437e-20	0.00175054	1627	2336	ENSG00000117597	UTP25	UTP25, small subunit processor component [Source:HGNC Symbol;Acc:HGNC:28440]
ENSG00000010017	3654.36	0.329446	0.0344091	9.57438	1.02472e-21	1.33684e-20	0.000835219	3052	3979	ENSG00000010017	RANBP9	RAN binding protein 9 [Source:HGNC Symbol;Acc:HGNC:13727]
ENSG00000165271	4096.96	0.665886	0.0695544	9.5736	1.03248e-21	1.3457e-20	0.00434663	2880.33	4746.67	ENSG00000165271	NOL6	nucleolar protein 6 [Source:HGNC Symbol;Acc:HGNC:19910]
ENSG00000134815	1367.74	0.540921	0.0565074	9.57258	1.04275e-21	1.35782e-20	0.00220286	1025.67	1550.5	ENSG00000134815	DHX34	DExH-box helicase 34 [Source:HGNC Symbol;Acc:HGNC:16719]
ENSG00000196177	1255.36	0.459538	0.0480105	9.57163	1.05238e-21	1.36908e-20	0.00129747	981.667	1401.33	ENSG00000196177	ACADSB	acyl-CoA dehydrogenase short/branched chain [Source:HGNC Symbol;Acc:HGNC:91]
ENSG00000090013	591.366	-0.795046	0.0830671	-9.57113	1.05747e-21	1.37441e-20	0.00511073	806.333	482.333	ENSG00000090013	BLVRB	biliverdin reductase B [Source:HGNC Symbol;Acc:HGNC:1063]
ENSG00000155158	352.533	-0.946181	0.098902	-9.56685	1.10215e-21	1.43115e-20	0.0068644	507.333	273.5	ENSG00000155158	TTC39B	tetratricopeptide repeat domain 39B [Source:HGNC Symbol;Acc:HGNC:23704]
ENSG00000100625	2271.33	-0.749191	0.0783259	-9.56505	1.12145e-21	1.45486e-20	0.00549822	3041	1879.33	ENSG00000100625	SIX4	SIX homeobox 4 [Source:HGNC Symbol;Acc:HGNC:10890]
ENSG00000141696	908.839	-0.491354	0.0513755	-9.56398	1.1331e-21	1.46859e-20	0.00151975	1100.67	813	ENSG00000141696	P3H4	prolyl 3-hydroxylase family member 4 (non-enzymatic) [Source:HGNC Symbol;Acc:HGNC:16946]
ENSG00000143079	3202.42	-0.356225	0.0372567	-9.56138	1.16196e-21	1.50461e-20	0.00103957	3664.67	2972.5	ENSG00000143079	CTTNBP2NL	CTTNBP2 N-terminal like [Source:HGNC Symbol;Acc:HGNC:25330]
ENSG00000136045	3914.26	0.528527	0.0552835	9.5603	1.17413e-21	1.51895e-20	0.00263561	2956	4425	ENSG00000136045	PWP1	PWP1 homolog, endonuclein [Source:HGNC Symbol;Acc:HGNC:17015]
ENSG00000013810	6294.22	0.333723	0.0349086	9.5599	1.17872e-21	1.52347e-20	0.00099512	5247.67	6861.83	ENSG00000013810	TACC3	transforming acidic coiled-coil containing protein 3 [Source:HGNC Symbol;Acc:HGNC:11524]
ENSG00000108679	16450.6	-0.51472	0.0538454	-9.55922	1.18647e-21	1.53207e-20	0.00272996	20140.3	14617.7	ENSG00000108679	LGALS3BP	galectin 3 binding protein [Source:HGNC Symbol;Acc:HGNC:6564]
ENSG00000052749	3006.78	0.624155	0.0653052	9.5575	1.20641e-21	1.55636e-20	0.00369264	2160.67	3457.83	ENSG00000052749	RRP12	ribosomal RNA processing 12 homolog [Source:HGNC Symbol;Acc:HGNC:29100]
ENSG00000111144	4559.27	-0.392787	0.0411118	-9.55411	1.24653e-21	1.60664e-20	0.0014186	5302.33	4189.83	ENSG00000111144	LTA4H	leukotriene A4 hydrolase [Source:HGNC Symbol;Acc:HGNC:6710]
ENSG00000114473	267.745	-0.912948	0.0956141	-9.54826	1.31889e-21	1.69833e-20	0.00544491	381	210	ENSG00000114473	IQCG	IQ motif containing G [Source:HGNC Symbol;Acc:HGNC:25251]
ENSG00000161847	2066.75	0.488777	0.0512158	9.54348	1.38117e-21	1.77688e-20	0.00195786	1594.67	2320.83	ENSG00000161847	RAVER1	ribonucleoprotein, PTB binding 1 [Source:HGNC Symbol;Acc:HGNC:30296]
ENSG00000196547	2503.88	-0.414714	0.0434772	-9.53866	1.44696e-21	1.85981e-20	0.00144338	2934.67	2288	ENSG00000196547	MAN2A2	mannosidase alpha class 2A member 2 [Source:HGNC Symbol;Acc:HGNC:6825]
ENSG00000198843	2488.48	0.40765	0.0427376	9.53845	1.44987e-21	1.86182e-20	0.00129998	1999.33	2751.33	ENSG00000198843	SELENOT	selenoprotein T [Source:HGNC Symbol;Acc:HGNC:18136]
ENSG00000228300	737.811	0.633709	0.0664616	9.53496	1.49943e-21	1.92369e-20	0.00258723	527.667	849.667	ENSG00000228300	C19orf24	chromosome 19 open reading frame 24 [Source:HGNC Symbol;Acc:HGNC:26073]
ENSG00000144231	2628.72	0.344839	0.0361679	9.53438	1.50779e-21	1.93264e-20	0.000834513	2177.33	2871.33	ENSG00000144231	POLR2D	RNA polymerase II subunit D [Source:HGNC Symbol;Acc:HGNC:9191]
ENSG00000242498	2002.37	-0.396866	0.0416256	-9.53419	1.51063e-21	1.9345e-20	0.00119743	2332.33	1839.17	ENSG00000242498	ARPIN	actin related protein 2/3 complex inhibitor [Source:HGNC Symbol;Acc:HGNC:28782]
ENSG00000122378	4682.28	-0.511387	0.0536471	-9.53243	1.53644e-21	1.96574e-20	0.00256859	5722.33	4162.67	ENSG00000122378	PRXL2A	peroxiredoxin like 2A [Source:HGNC Symbol;Acc:HGNC:28651]
ENSG00000115271	490.612	-0.683325	0.0717268	-9.52678	1.62233e-21	2.07372e-20	0.00309815	641	414.667	ENSG00000115271	GCA	grancalcin [Source:HGNC Symbol;Acc:HGNC:15990]
ENSG00000135776	1102.68	0.484429	0.0508561	9.52548	1.64285e-21	2.09803e-20	0.00143213	851.333	1236.5	ENSG00000135776	ABCB10	ATP binding cassette subfamily B member 10 [Source:HGNC Symbol;Acc:HGNC:41]
ENSG00000144681	862.685	0.719611	0.0755524	9.52465	1.65598e-21	2.11285e-20	0.00402208	589.667	1008	ENSG00000144681	STAC	SH3 and cysteine rich domain [Source:HGNC Symbol;Acc:HGNC:11353]
ENSG00000120539	2040.51	0.400008	0.0419986	9.52432	1.66131e-21	2.11771e-20	0.00114118	1643.33	2252.5	ENSG00000120539	MASTL	microtubule associated serine/threonine kinase like [Source:HGNC Symbol;Acc:HGNC:19042]
ENSG00000111247	1210.16	0.542614	0.05698	9.52289	1.68436e-21	2.14513e-20	0.00214115	907.333	1371.67	ENSG00000111247	RAD51AP1	RAD51 associated protein 1 [Source:HGNC Symbol;Acc:HGNC:16956]
ENSG00000136527	7345.27	0.436756	0.0458939	9.51664	1.78868e-21	2.27591e-20	0.00186824	5814	8168.67	ENSG00000136527	TRA2B	transformer 2 beta homolog [Source:HGNC Symbol;Acc:HGNC:10781]
ENSG00000006576	2911.27	0.341719	0.0359233	9.51246	1.86199e-21	2.36703e-20	0.000858957	2416.33	3178.67	ENSG00000006576	PHTF2	putative homeodomain transcription factor 2 [Source:HGNC Symbol;Acc:HGNC:13411]
ENSG00000170515	6789.8	0.460776	0.0484867	9.50315	2.03643e-21	2.58641e-20	0.00208932	5311.33	7583.33	ENSG00000170515	PA2G4	proliferation-associated 2G4 [Source:HGNC Symbol;Acc:HGNC:8550]
ENSG00000137460	79.7402	-1.8534	0.195101	-9.49968	2.10541e-21	2.67159e-20	0.0244383	150.333	43.3333	ENSG00000137460	FHDC1	FH2 domain containing 1 [Source:HGNC Symbol;Acc:HGNC:29363]
ENSG00000135999	1171.99	0.720892	0.0759109	9.49655	2.16968e-21	2.74911e-20	0.0044596	800.667	1368.33	ENSG00000135999	EPC2	enhancer of polycomb homolog 2 [Source:HGNC Symbol;Acc:HGNC:24543]
ENSG00000158373	11565.8	0.564011	0.0593914	9.49651	2.17045e-21	2.74911e-20	0.00328625	8579.33	13156.8	ENSG00000158373	HIST1H2BD	histone cluster 1 H2B family member d [Source:HGNC Symbol;Acc:HGNC:4747]
ENSG00000137547	1356.98	0.480524	0.0506013	9.49627	2.17546e-21	2.75295e-20	0.00160574	1050	1520.67	ENSG00000137547	MRPL15	mitochondrial ribosomal protein L15 [Source:HGNC Symbol;Acc:HGNC:14054]
ENSG00000124762	1489.94	-0.750197	0.0790272	-9.49289	2.24708e-21	2.84099e-20	0.00539622	1999.33	1232.67	ENSG00000124762	CDKN1A	cyclin dependent kinase inhibitor 1A [Source:HGNC Symbol;Acc:HGNC:1784]
ENSG00000150093	27862.2	-0.329002	0.0346588	-9.4926	2.25336e-21	2.84635e-20	0.0011203	31556	26059.7	ENSG00000150093	ITGB1	integrin subunit beta 1 [Source:HGNC Symbol;Acc:HGNC:6153]
ENSG00000079332	8138.83	0.299633	0.03157	9.49106	2.28695e-21	2.88616e-20	0.000823083	6898.67	8808.33	ENSG00000079332	SAR1A	secretion associated Ras related GTPase 1A [Source:HGNC Symbol;Acc:HGNC:10534]
ENSG00000138668	13489.3	0.242608	0.0255631	9.49055	2.29824e-21	2.89777e-20	0.000548048	11751.7	14442.5	ENSG00000138668	HNRNPD	heterogeneous nuclear ribonucleoprotein D [Source:HGNC Symbol;Acc:HGNC:5036]
ENSG00000100296	2583.99	0.417041	0.0439476	9.48951	2.32117e-21	2.92405e-20	0.00141627	2066	2862.67	ENSG00000100296	THOC5	THO complex 5 [Source:HGNC Symbol;Acc:HGNC:19074]
ENSG00000121797	1581.63	0.669524	0.0705699	9.48738	2.36911e-21	2.98174e-20	0.00400197	1110.33	1831.17	ENSG00000121797	CCRL2	C-C motif chemokine receptor like 2 [Source:HGNC Symbol;Acc:HGNC:1612]
ENSG00000130508	27597.2	-0.474499	0.0500177	-9.48662	2.38658e-21	3.00101e-20	0.0023704	33210	24781.3	ENSG00000130508	PXDN	peroxidasin [Source:HGNC Symbol;Acc:HGNC:14966]
ENSG00000170373	4731.67	-2.0542	0.216587	-9.48441	2.43753e-21	3.06231e-20	0.0448622	9410	2334.67	ENSG00000170373	CST1	cystatin SN [Source:HGNC Symbol;Acc:HGNC:2473]
ENSG00000126870	1029.5	-0.525763	0.0554832	-9.47607	2.6403e-21	3.31407e-20	0.00206447	1265	912.167	ENSG00000126870	WDR60	WD repeat domain 60 [Source:HGNC Symbol;Acc:HGNC:21862]
ENSG00000130725	4119.82	0.514386	0.0543082	9.47161	2.75568e-21	3.45577e-20	0.0025493	3135	4644.17	ENSG00000130725	UBE2M	ubiquitin conjugating enzyme E2 M [Source:HGNC Symbol;Acc:HGNC:12491]
ENSG00000102181	2329.47	-0.631675	0.0667167	-9.46802	2.85201e-21	3.57336e-20	0.00388648	2988.67	1998.17	ENSG00000102181	CD99L2	CD99 molecule like 2 [Source:HGNC Symbol;Acc:HGNC:18237]
ENSG00000049449	7847.19	-0.311011	0.032856	-9.46588	2.91096e-21	3.64394e-20	0.000916348	8817.67	7374.5	ENSG00000049449	RCN1	reticulocalbin 1 [Source:HGNC Symbol;Acc:HGNC:9934]
ENSG00000274180	301.831	-1.0469	0.110614	-9.46448	2.95034e-21	3.68991e-20	0.00879935	451	226.167	ENSG00000274180	NATD1	N-acetyltransferase domain containing 1 [Source:HGNC Symbol;Acc:HGNC:30770]
ENSG00000114270	3375.74	0.722484	0.0763744	9.45978	3.08602e-21	3.85614e-20	0.00523062	2300	3946.17	ENSG00000114270	COL7A1	collagen type VII alpha 1 chain [Source:HGNC Symbol;Acc:HGNC:2214]
ENSG00000096384	86341.4	0.228689	0.0241858	9.45547	3.21568e-21	4.01455e-20	0.000549656	75757.7	92138.2	ENSG00000096384	HSP90AB1	heat shock protein 90 alpha family class B member 1 [Source:HGNC Symbol;Acc:HGNC:5258]
ENSG00000113648	10350.7	0.332582	0.0351742	9.45531	3.2208e-21	4.01734e-20	0.00108195	8633.67	11278.3	ENSG00000113648	H2AFY	H2A histone family member Y [Source:HGNC Symbol;Acc:HGNC:4740]
ENSG00000065457	1745.91	0.645777	0.068326	9.4514	3.34316e-21	4.16622e-20	0.00378225	1240.67	2012	ENSG00000065457	ADAT1	adenosine deaminase, tRNA specific 1 [Source:HGNC Symbol;Acc:HGNC:228]
ENSG00000140379	178.703	-1.34457	0.142289	-9.44961	3.40103e-21	4.23456e-20	0.014397	292.667	120	ENSG00000140379	BCL2A1	BCL2 related protein A1 [Source:HGNC Symbol;Acc:HGNC:991]
ENSG00000100578	5274.16	0.301811	0.0319404	9.4492	3.41428e-21	4.24726e-20	0.000772477	4466.33	5716.33	ENSG00000100578	KIAA0586	KIAA0586 [Source:HGNC Symbol;Acc:HGNC:19960]
ENSG00000167721	5879.19	0.451133	0.0477475	9.44832	3.44325e-21	4.27947e-20	0.00199529	4615.67	6557.83	ENSG00000167721	TSR1	TSR1, ribosome maturation factor [Source:HGNC Symbol;Acc:HGNC:25542]
ENSG00000152102	7387.25	0.317134	0.0335674	9.44767	3.46451e-21	4.30205e-20	0.00093364	6211	8028.33	ENSG00000152102	FAM168B	family with sequence similarity 168 member B [Source:HGNC Symbol;Acc:HGNC:27016]
ENSG00000176058	582.486	0.729447	0.0772218	9.44613	3.51585e-21	4.36192e-20	0.00355497	396	680.667	ENSG00000176058	TPRN	taperin [Source:HGNC Symbol;Acc:HGNC:26894]
ENSG00000140386	1122.91	-0.439897	0.0465867	-9.44254	3.63835e-21	4.50987e-20	0.00125699	1331	1019	ENSG00000140386	SCAPER	S-phase cyclin A associated protein in the ER [Source:HGNC Symbol;Acc:HGNC:13081]
ENSG00000101441	1497.83	-2.46826	0.261418	-9.44179	3.66448e-21	4.53821e-20	0.06491	3242	603.5	ENSG00000101441	CST4	cystatin S [Source:HGNC Symbol;Acc:HGNC:2476]
ENSG00000139083	2156.55	-0.432794	0.0458462	-9.44013	3.7233e-21	4.60696e-20	0.00158777	2548.67	1960.17	ENSG00000139083	ETV6	ETS variant 6 [Source:HGNC Symbol;Acc:HGNC:3495]
ENSG00000111335	364.42	-0.813373	0.0861698	-9.43919	3.75669e-21	4.64415e-20	0.00467115	500.333	295.167	ENSG00000111335	OAS2	2'-5'-oligoadenylate synthetase 2 [Source:HGNC Symbol;Acc:HGNC:8087]
ENSG00000169093	489.463	-0.996393	0.105688	-9.42767	4.19307e-21	5.17902e-20	0.00890891	717	373.667	ENSG00000169093	ASMTL	acetylserotonin O-methyltransferase like [Source:HGNC Symbol;Acc:HGNC:751]
ENSG00000103528	251.043	-1.07764	0.114382	-9.42141	4.45049e-21	5.49029e-20	0.0090115	377	185.667	ENSG00000103528	SYT17	synaptotagmin 17 [Source:HGNC Symbol;Acc:HGNC:24119]
ENSG00000065978	24210	0.320193	0.0339859	9.42136	4.45297e-21	5.49029e-20	0.00106435	20318.3	26321	ENSG00000065978	YBX1	Y-box binding protein 1 [Source:HGNC Symbol;Acc:HGNC:8014]
ENSG00000237649	5334.18	0.396634	0.042153	9.40941	4.98938e-21	6.14621e-20	0.00149579	4308.33	5885	ENSG00000237649	KIFC1	kinesin family member C1 [Source:HGNC Symbol;Acc:HGNC:6389]
ENSG00000184661	2947.8	0.489915	0.0521027	9.40286	5.31002e-21	6.53541e-20	0.00221383	2270	3308.5	ENSG00000184661	CDCA2	cell division cycle associated 2 [Source:HGNC Symbol;Acc:HGNC:14623]
ENSG00000101337	5046.05	-0.347125	0.0369188	-9.4024	5.33336e-21	6.55834e-20	0.00112271	5756.33	4695.17	ENSG00000101337	TM9SF4	transmembrane 9 superfamily member 4 [Source:HGNC Symbol;Acc:HGNC:30797]
ENSG00000131351	951.478	0.512436	0.0545113	9.40055	5.42769e-21	6.66844e-20	0.00162356	724.333	1073	ENSG00000131351	HAUS8	HAUS augmin like complex subunit 8 [Source:HGNC Symbol;Acc:HGNC:30532]
ENSG00000215012	957.386	0.681166	0.0725132	9.39369	5.79359e-21	7.11171e-20	0.00375284	666.667	1111.5	ENSG00000215012	RTL10	retrotransposon Gag like 10 [Source:HGNC Symbol;Acc:HGNC:26112]
ENSG00000204650	528.28	-0.62233	0.0662551	-9.39294	5.83464e-21	7.15578e-20	0.00249452	674	454.5	ENSG00000204650	LINC02210	long intergenic non-protein coding RNA 2210 [Source:HGNC Symbol;Acc:HGNC:26327]
ENSG00000117500	5630.13	-0.349082	0.0371665	-9.39238	5.86576e-21	7.18762e-20	0.0011598	6425.67	5238	ENSG00000117500	TMED5	transmembrane p24 trafficking protein 5 [Source:HGNC Symbol;Acc:HGNC:24251]
ENSG00000142731	2262	0.411093	0.0437803	9.3899	6.00581e-21	7.35276e-20	0.00134052	1813.33	2502.33	ENSG00000142731	PLK4	polo like kinase 4 [Source:HGNC Symbol;Acc:HGNC:11397]
ENSG00000179454	565.921	-0.647863	0.0690038	-9.38879	6.06908e-21	7.42369e-20	0.00297059	729.667	483.5	ENSG00000179454	KLHL28	kelch like family member 28 [Source:HGNC Symbol;Acc:HGNC:19741]
ENSG00000105662	1024.27	0.575787	0.0613905	9.37909	6.65442e-21	8.13253e-20	0.002452	755.333	1168.17	ENSG00000105662	CRTC1	CREB regulated transcription coactivator 1 [Source:HGNC Symbol;Acc:HGNC:16062]
ENSG00000151729	1557.42	0.417564	0.0445285	9.37746	6.75794e-21	8.2518e-20	0.00117587	1244.67	1725.5	ENSG00000151729	SLC25A4	solute carrier family 25 member 4 [Source:HGNC Symbol;Acc:HGNC:10990]
ENSG00000035928	3554.65	0.317765	0.0338871	9.37716	6.7773e-21	8.26818e-20	0.000793607	2985.33	3863.67	ENSG00000035928	RFC1	replication factor C subunit 1 [Source:HGNC Symbol;Acc:HGNC:9969]
ENSG00000097046	2569.94	0.623641	0.0665565	9.3701	7.24657e-21	8.83295e-20	0.00378233	1844.33	2953.17	ENSG00000097046	CDC7	cell division cycle 7 [Source:HGNC Symbol;Acc:HGNC:1745]
ENSG00000197061	7372.28	0.884136	0.0943725	9.36858	7.35157e-21	8.95309e-20	0.00837544	4609	8835	ENSG00000197061	HIST1H4C	histone cluster 1 H4 family member c [Source:HGNC Symbol;Acc:HGNC:4787]
ENSG00000105287	1389.57	-0.468825	0.0500434	-9.36836	7.36691e-21	8.96393e-20	0.00173937	1666.33	1249.83	ENSG00000105287	PRKD2	protein kinase D2 [Source:HGNC Symbol;Acc:HGNC:17293]
ENSG00000065357	568.47	-0.972568	0.103949	-9.35621	8.26485e-21	1.00478e-19	0.0088112	823.667	437	ENSG00000065357	DGKA	diacylglycerol kinase alpha [Source:HGNC Symbol;Acc:HGNC:2849]
ENSG00000168710	12725.5	-0.275971	0.0295035	-9.35383	8.4527e-21	1.02672e-19	0.000761376	14076	12063.8	ENSG00000168710	AHCYL1	adenosylhomocysteinase like 1 [Source:HGNC Symbol;Acc:HGNC:344]
ENSG00000162458	2391.87	-0.40518	0.0433287	-9.35131	8.65699e-21	1.05061e-19	0.00141302	2797.33	2190.67	ENSG00000162458	FBLIM1	filamin binding LIM protein 1 [Source:HGNC Symbol;Acc:HGNC:24686]
ENSG00000161800	6463.64	0.350099	0.0374416	9.35053	8.72096e-21	1.05745e-19	0.00117495	5345.67	7065.33	ENSG00000161800	RACGAP1	Rac GTPase activating protein 1 [Source:HGNC Symbol;Acc:HGNC:9804]
ENSG00000151445	1338.94	-0.450706	0.0482185	-9.34715	9.0037e-21	1.09079e-19	0.00154036	1595	1211.67	ENSG00000151445	VIPAS39	VPS33B interacting protein, apical-basolateral polarity regulator, spe-39 homolog [Source:HGNC Symbol;Acc:HGNC:20347]
ENSG00000105701	6494.46	-0.449756	0.0481292	-9.34476	9.20981e-21	1.11479e-19	0.00208276	7736	5878	ENSG00000105701	FKBP8	FK506 binding protein 8 [Source:HGNC Symbol;Acc:HGNC:3724]
ENSG00000031823	3046.46	0.432067	0.0462368	9.34465	9.21903e-21	1.11493e-19	0.00167956	2418	3384.67	ENSG00000031823	RANBP3	RAN binding protein 3 [Source:HGNC Symbol;Acc:HGNC:9850]
ENSG00000070950	2591.34	0.522895	0.0559588	9.34428	9.25166e-21	1.11791e-19	0.0025549	1960.67	2925.83	ENSG00000070950	RAD18	RAD18, E3 ubiquitin protein ligase [Source:HGNC Symbol;Acc:HGNC:18278]
ENSG00000089685	7056.65	0.335231	0.0358837	9.34217	9.43802e-21	1.13944e-19	0.00108037	5878.67	7696.33	ENSG00000089685	BIRC5	baculoviral IAP repeat containing 5 [Source:HGNC Symbol;Acc:HGNC:593]
ENSG00000164171	25930	-0.731803	0.0783547	-9.33962	9.66832e-21	1.16623e-19	0.00586463	34593	21584.5	ENSG00000164171	ITGA2	integrin subunit alpha 2 [Source:HGNC Symbol;Acc:HGNC:6137]
ENSG00000144283	4921.54	0.30252	0.0324137	9.33308	1.02838e-20	1.2394e-19	0.000786785	4165.33	5330.5	ENSG00000144283	PKP4	plakophilin 4 [Source:HGNC Symbol;Acc:HGNC:9026]
ENSG00000163755	2015.21	-0.629756	0.067489	-9.33124	1.0464e-20	1.26003e-19	0.00392501	2577	1728.5	ENSG00000163755	HPS3	HPS3, biogenesis of lysosomal organelles complex 2 subunit 1 [Source:HGNC Symbol;Acc:HGNC:15597]
ENSG00000164331	285.962	-0.914607	0.0980884	-9.32432	1.11697e-20	1.34384e-19	0.00611739	406.333	224.167	ENSG00000164331	ANKRA2	ankyrin repeat family A member 2 [Source:HGNC Symbol;Acc:HGNC:13208]
ENSG00000106635	1823.44	0.623395	0.0668934	9.31923	1.17187e-20	1.40868e-19	0.00363153	1311.67	2096.33	ENSG00000106635	BCL7B	BCL tumor suppressor 7B [Source:HGNC Symbol;Acc:HGNC:1005]
ENSG00000156711	6836.45	-0.492149	0.052812	-9.31887	1.17583e-20	1.41222e-19	0.00254488	8271	6112.83	ENSG00000156711	MAPK13	mitogen-activated protein kinase 13 [Source:HGNC Symbol;Acc:HGNC:6875]
ENSG00000105821	717.448	0.558025	0.0598934	9.31698	1.197e-20	1.4364e-19	0.00178766	533.333	815.5	ENSG00000105821	DNAJC2	DnaJ heat shock protein family (Hsp40) member C2 [Source:HGNC Symbol;Acc:HGNC:13192]
ENSG00000067334	7643.09	0.431769	0.0463718	9.31102	1.26607e-20	1.51798e-19	0.00191691	6065.67	8492.67	ENSG00000067334	DNTTIP2	deoxynucleotidyltransferase terminal interacting protein 2 [Source:HGNC Symbol;Acc:HGNC:24013]
ENSG00000132823	1958.5	0.429889	0.0461721	9.31058	1.27131e-20	1.52295e-19	0.00146606	1555.33	2173.67	ENSG00000132823	OSER1	oxidative stress responsive serine rich 1 [Source:HGNC Symbol;Acc:HGNC:16105]
ENSG00000167272	574.348	0.673657	0.0723828	9.30687	1.31658e-20	1.57581e-19	0.00287393	402	665.333	ENSG00000167272	POP5	POP5 homolog, ribonuclease P/MRP subunit [Source:HGNC Symbol;Acc:HGNC:17689]
ENSG00000130775	255.897	-1.0891	0.117029	-9.30622	1.32461e-20	1.58406e-19	0.00967097	387.333	189.167	ENSG00000130775	THEMIS2	thymocyte selection associated family member 2 [Source:HGNC Symbol;Acc:HGNC:16839]
ENSG00000184992	1971.62	0.485322	0.0521656	9.30348	1.35917e-20	1.624e-19	0.00202566	1521.33	2212.33	ENSG00000184992	BRI3BP	BRI3 binding protein [Source:HGNC Symbol;Acc:HGNC:14251]
ENSG00000198399	3538.53	-0.29634	0.0318538	-9.30313	1.36365e-20	1.62795e-19	0.000706115	3949.67	3338.5	ENSG00000198399	ITSN2	intersectin 2 [Source:HGNC Symbol;Acc:HGNC:6184]
ENSG00000223784	448.534	0.779776	0.083832	9.30166	1.38276e-20	1.64936e-19	0.00387385	296.333	528.833	ENSG00000223784	LINP1	lncRNA in non-homologous end joining pathway 1 [Source:HGNC Symbol;Acc:HGNC:53170]
ENSG00000142784	1531.09	-0.634522	0.0682295	-9.29983	1.40676e-20	1.67654e-19	0.00387914	1965	1312.5	ENSG00000142784	WDTC1	WD and tetratricopeptide repeats 1 [Source:HGNC Symbol;Acc:HGNC:29175]
ENSG00000163393	875.588	-0.69581	0.0748322	-9.29827	1.42747e-20	1.69978e-19	0.00434742	1147.33	736.833	ENSG00000163393	SLC22A15	solute carrier family 22 member 15 [Source:HGNC Symbol;Acc:HGNC:20301]
ENSG00000180900	6739.89	0.329743	0.0354638	9.29802	1.43082e-20	1.70231e-19	0.00104448	5626	7342.17	ENSG00000180900	SCRIB	scribbled planar cell polarity protein [Source:HGNC Symbol;Acc:HGNC:30377]
ENSG00000139437	1186.45	0.539206	0.058003	9.29618	1.45576e-20	1.7305e-19	0.00223566	889.667	1344.17	ENSG00000139437	TCHP	trichoplein keratin filament binding [Source:HGNC Symbol;Acc:HGNC:28135]
ENSG00000177732	1883.36	-0.501777	0.0539953	-9.29298	1.50024e-20	1.78185e-19	0.00231146	2291.33	1679.17	ENSG00000177732	SOX12	SRY-box 12 [Source:HGNC Symbol;Acc:HGNC:11198]
ENSG00000132323	867.24	0.578407	0.0622452	9.29239	1.50861e-20	1.79027e-19	0.00234019	638	988.667	ENSG00000132323	ILKAP	ILK associated serine/threonine phosphatase [Source:HGNC Symbol;Acc:HGNC:15566]
ENSG00000140382	1657.32	-0.47121	0.0507413	-9.28651	1.59432e-20	1.89036e-19	0.00191494	1990	1490.33	ENSG00000140382	HMG20A	high mobility group 20A [Source:HGNC Symbol;Acc:HGNC:5001]
ENSG00000177370	1537.27	0.532749	0.0573743	9.28549	1.60962e-20	1.90688e-19	0.00239527	1159	1738.83	ENSG00000177370	TIMM22	translocase of inner mitochondrial membrane 22 [Source:HGNC Symbol;Acc:HGNC:17317]
ENSG00000145545	1137.9	0.470431	0.0506798	9.28242	1.6567e-20	1.961e-19	0.00145244	885.333	1273.33	ENSG00000145545	SRD5A1	steroid 5 alpha-reductase 1 [Source:HGNC Symbol;Acc:HGNC:11284]
ENSG00000179912	1021.77	-0.699574	0.0753746	-9.2813	1.6743e-20	1.98014e-19	0.00457392	1342	859.333	ENSG00000179912	R3HDM2	R3H domain containing 2 [Source:HGNC Symbol;Acc:HGNC:29167]
ENSG00000139211	4722.57	0.834083	0.0899006	9.27783	1.7296e-20	2.04381e-19	0.00748679	3038.67	5607.83	ENSG00000139211	AMIGO2	adhesion molecule with Ig like domain 2 [Source:HGNC Symbol;Acc:HGNC:24073]
ENSG00000155324	1514.13	-0.871233	0.093929	-9.27544	1.76885e-20	2.08841e-19	0.00788618	2121.67	1205.17	ENSG00000155324	GRAMD2B	GRAM domain containing 2B [Source:HGNC Symbol;Acc:HGNC:24911]
ENSG00000101150	12910.5	0.337295	0.036369	9.27425	1.78881e-20	2.11019e-19	0.00118516	10741.3	14081.3	ENSG00000101150	TPD52L2	TPD52 like 2 [Source:HGNC Symbol;Acc:HGNC:12007]
ENSG00000090316	2714.45	0.432208	0.0466066	9.27354	1.80076e-20	2.12249e-19	0.0016667	2154	3015.67	ENSG00000090316	MAEA	macrophage erythroblast attacher [Source:HGNC Symbol;Acc:HGNC:13731]
ENSG00000187535	558.376	-0.628524	0.0677852	-9.2723	1.82181e-20	2.14548e-19	0.00278492	713	479.333	ENSG00000187535	IFT140	intraflagellar transport 140 [Source:HGNC Symbol;Acc:HGNC:29077]
ENSG00000108651	2957.85	0.378273	0.0408176	9.2674	1.90745e-20	2.24444e-19	0.00122161	2411	3254.5	ENSG00000108651	UTP6	UTP6, small subunit processome component [Source:HGNC Symbol;Acc:HGNC:18279]
ENSG00000145220	2866.2	0.433095	0.0467514	9.26379	1.97298e-20	2.31958e-19	0.0017018	2271.67	3183.17	ENSG00000145220	LYAR	Ly1 antibody reactive [Source:HGNC Symbol;Acc:HGNC:26021]
ENSG00000113761	668.822	0.611306	0.0660163	9.25991	2.04596e-20	2.40336e-19	0.00237397	483.667	767	ENSG00000113761	ZNF346	zinc finger protein 346 [Source:HGNC Symbol;Acc:HGNC:16403]
ENSG00000168411	6913.56	0.736053	0.0795061	9.25782	2.08649e-20	2.4489e-19	0.00589035	4684.33	8091.17	ENSG00000168411	RFWD3	ring finger and WD repeat domain 3 [Source:HGNC Symbol;Acc:HGNC:25539]
ENSG00000133812	3804.46	-0.865419	0.0934818	-9.25762	2.09047e-20	2.45151e-19	0.00816171	5313.67	3035	ENSG00000133812	SBF2	SET binding factor 2 [Source:HGNC Symbol;Acc:HGNC:2135]
ENSG00000197461	1761.6	-0.510508	0.055148	-9.25704	2.10169e-20	2.46258e-19	0.00239907	2149.33	1567.5	ENSG00000197461	PDGFA	platelet derived growth factor subunit A [Source:HGNC Symbol;Acc:HGNC:8799]
ENSG00000177548	359.119	0.81515	0.0881089	9.25162	2.21107e-20	2.58857e-19	0.00381392	233	425.5	ENSG00000177548	RABEP2	rabaptin, RAB GTPase binding effector protein 2 [Source:HGNC Symbol;Acc:HGNC:24817]
ENSG00000173674	5046.03	0.443685	0.0479594	9.25126	2.21872e-20	2.59534e-19	0.00198308	3980	5616.83	ENSG00000173674	EIF1AX	eukaryotic translation initiation factor 1A X-linked [Source:HGNC Symbol;Acc:HGNC:3250]
ENSG00000134369	3933.3	-0.576246	0.0622992	-9.24966	2.25211e-20	2.63219e-19	0.00349681	4932.33	3434	ENSG00000134369	NAV1	neuron navigator 1 [Source:HGNC Symbol;Acc:HGNC:15989]
ENSG00000148840	5619.49	0.514987	0.055703	9.24523	2.34738e-20	2.74123e-19	0.0027727	4272	6340.67	ENSG00000148840	PPRC1	peroxisome proliferator-activated receptor gamma, coactivator-related 1 [Source:HGNC Symbol;Acc:HGNC:30025]
ENSG00000103042	856.687	0.676717	0.0732373	9.24007	2.46341e-20	2.87432e-19	0.0037041	599.333	993.667	ENSG00000103042	SLC38A7	solute carrier family 38 member 7 [Source:HGNC Symbol;Acc:HGNC:25582]
ENSG00000177380	227.61	-1.05002	0.113643	-9.23967	2.47257e-20	2.8826e-19	0.00848728	339.333	170.5	ENSG00000177380	PPFIA3	PTPRF interacting protein alpha 3 [Source:HGNC Symbol;Acc:HGNC:9247]
ENSG00000132334	2534.29	-0.447543	0.0484479	-9.23761	2.52071e-20	2.93625e-19	0.00188865	3017	2293.83	ENSG00000132334	PTPRE	protein tyrosine phosphatase, receptor type E [Source:HGNC Symbol;Acc:HGNC:9669]
ENSG00000179222	1958.72	-0.606887	0.0657014	-9.23705	2.53391e-20	2.94916e-19	0.00368223	2485	1693.5	ENSG00000179222	MAGED1	MAGE family member D1 [Source:HGNC Symbol;Acc:HGNC:6813]
ENSG00000165476	4080.18	-0.324293	0.0351284	-9.23165	2.66483e-20	3.09895e-19	0.000953663	4611.33	3821.5	ENSG00000165476	REEP3	receptor accessory protein 3 [Source:HGNC Symbol;Acc:HGNC:23711]
ENSG00000145284	756.17	-0.580282	0.0628673	-9.23026	2.69979e-20	3.13699e-19	0.00258825	948.333	658.667	ENSG00000145284	SCD5	stearoyl-CoA desaturase 5 [Source:HGNC Symbol;Acc:HGNC:21088]
ENSG00000139636	451.791	-0.91979	0.099661	-9.22918	2.72705e-20	3.16602e-19	0.00756439	643.667	353.333	ENSG00000139636	LMBR1L	limb development membrane protein 1 like [Source:HGNC Symbol;Acc:HGNC:18268]
ENSG00000099282	1185.35	-0.708668	0.0767895	-9.22872	2.73896e-20	3.17719e-19	0.00490356	1567	993.5	ENSG00000099282	TSPAN15	tetraspanin 15 [Source:HGNC Symbol;Acc:HGNC:23298]
ENSG00000148719	2236.05	0.412666	0.0447181	9.22816	2.7532e-20	3.19105e-19	0.00141421	1792	2474	ENSG00000148719	DNAJB12	DnaJ heat shock protein family (Hsp40) member B12 [Source:HGNC Symbol;Acc:HGNC:14891]
ENSG00000062282	164.745	-1.38948	0.150574	-9.22789	2.7602e-20	3.19462e-19	0.0162811	274.333	108.667	ENSG00000062282	DGAT2	diacylglycerol O-acyltransferase 2 [Source:HGNC Symbol;Acc:HGNC:16940]
ENSG00000095564	4227.85	0.324557	0.0351714	9.22786	2.76087e-20	3.19462e-19	0.000927582	3536.67	4599.5	ENSG00000095564	BTAF1	B-TFIID TATA-box binding protein associated factor 1 [Source:HGNC Symbol;Acc:HGNC:17307]
ENSG00000021355	1683.95	-0.575111	0.0623407	-9.22529	2.82807e-20	3.26967e-19	0.00319098	2109.33	1469.83	ENSG00000021355	SERPINB1	serpin family B member 1 [Source:HGNC Symbol;Acc:HGNC:3311]
ENSG00000161981	869.613	0.769854	0.0834677	9.22338	2.87876e-20	3.3255e-19	0.00521528	579.667	1023.83	ENSG00000161981	SNRNP25	small nuclear ribonucleoprotein U11/U12 subunit 25 [Source:HGNC Symbol;Acc:HGNC:14161]
ENSG00000087077	2185.17	0.430265	0.0466622	9.22083	2.94796e-20	3.40262e-19	0.00157013	1735	2425.67	ENSG00000087077	TRIP6	thyroid hormone receptor interactor 6 [Source:HGNC Symbol;Acc:HGNC:12311]
ENSG00000100105	1611.85	0.418611	0.0454049	9.2195	2.98497e-20	3.44249e-19	0.00127586	1286.67	1785.33	ENSG00000100105	PATZ1	POZ/BTB and AT hook containing zinc finger 1 [Source:HGNC Symbol;Acc:HGNC:13071]
ENSG00000136144	1253.89	-0.497425	0.0539561	-9.21907	2.99675e-20	3.45321e-19	0.00206109	1522.33	1119.67	ENSG00000136144	RCBTB1	RCC1 and BTB domain containing protein 1 [Source:HGNC Symbol;Acc:HGNC:18243]
ENSG00000136854	2185.58	-0.44177	0.0479551	-9.21216	3.19638e-20	3.6802e-19	0.0017841	2591.67	1981.17	ENSG00000136854	STXBP1	syntaxin binding protein 1 [Source:HGNC Symbol;Acc:HGNC:11444]
ENSG00000142230	5696.96	0.281802	0.0306083	9.2067	3.36303e-20	3.86887e-19	0.000708959	4872	6145.5	ENSG00000142230	SAE1	SUMO1 activating enzyme subunit 1 [Source:HGNC Symbol;Acc:HGNC:30660]
ENSG00000113448	3013.69	-0.415282	0.0451073	-9.20652	3.36856e-20	3.87204e-19	0.0016453	3539.67	2754.67	ENSG00000113448	PDE4D	phosphodiesterase 4D [Source:HGNC Symbol;Acc:HGNC:8783]
ENSG00000185515	1404.2	0.445843	0.0484367	9.20466	3.4274e-20	3.93642e-19	0.00143801	1107	1564	ENSG00000185515	BRCC3	BRCA1/BRCA2-containing complex subunit 3 [Source:HGNC Symbol;Acc:HGNC:24185]
ENSG00000140465	206.46	-0.965719	0.104941	-9.20253	3.49606e-20	4.01196e-19	0.0062567	299.333	159.167	ENSG00000140465	CYP1A1	cytochrome P450 family 1 subfamily A member 1 [Source:HGNC Symbol;Acc:HGNC:2595]
ENSG00000178585	1103.63	-0.502427	0.0546183	-9.19887	3.61734e-20	4.14773e-19	0.00203047	1342.67	984	ENSG00000178585	CTNNBIP1	catenin beta interacting protein 1 [Source:HGNC Symbol;Acc:HGNC:16913]
ENSG00000072071	1825.26	-0.380512	0.0413832	-9.19483	3.75578e-20	4.30292e-19	0.0011315	2111.33	1684.33	ENSG00000072071	ADGRL1	adhesion G protein-coupled receptor L1 [Source:HGNC Symbol;Acc:HGNC:20973]
ENSG00000197989	801.196	0.85311	0.0927846	9.19452	3.76668e-20	4.31186e-19	0.00661358	508.333	956.333	ENSG00000197989	SNHG12	small nucleolar RNA host gene 12 [Source:HGNC Symbol;Acc:HGNC:30062]
ENSG00000115525	482.857	-0.848466	0.0922945	-9.19303	3.81946e-20	4.36868e-19	0.00632851	671.333	386.5	ENSG00000115525	ST3GAL5	ST3 beta-galactoside alpha-2,3-sialyltransferase 5 [Source:HGNC Symbol;Acc:HGNC:10872]
ENSG00000171680	467.135	-0.746067	0.0811906	-9.18908	3.96206e-20	4.52807e-19	0.00440384	623.667	386.667	ENSG00000171680	PLEKHG5	pleckstrin homology and RhoGEF domain containing G5 [Source:HGNC Symbol;Acc:HGNC:29105]
ENSG00000121281	943.908	-0.529375	0.0576505	-9.18248	4.21258e-20	4.81043e-19	0.00221917	1160	834.833	ENSG00000121281	ADCY7	adenylate cyclase 7 [Source:HGNC Symbol;Acc:HGNC:238]
ENSG00000169981	681.079	0.694785	0.0756662	9.18223	4.22239e-20	4.81768e-19	0.00366526	471.667	791.5	ENSG00000169981	ZNF35	zinc finger protein 35 [Source:HGNC Symbol;Acc:HGNC:13099]
ENSG00000066136	1833.52	0.438756	0.047789	9.18112	4.26634e-20	4.86383e-19	0.00157069	1450.67	2040.17	ENSG00000066136	NFYC	nuclear transcription factor Y subunit gamma [Source:HGNC Symbol;Acc:HGNC:7806]
ENSG00000164023	2070.75	0.449399	0.0489533	9.18014	4.30513e-20	4.90404e-19	0.00174839	1629	2307.83	ENSG00000164023	SGMS2	sphingomyelin synthase 2 [Source:HGNC Symbol;Acc:HGNC:28395]
ENSG00000109787	1343.83	-0.469114	0.0511147	-9.17767	4.40514e-20	5.01386e-19	0.00182105	1614	1209.83	ENSG00000109787	KLF3	Kruppel like factor 3 [Source:HGNC Symbol;Acc:HGNC:16516]
ENSG00000204438	1184.76	0.474673	0.0517272	9.17646	4.45512e-20	5.0666e-19	0.00159432	919.667	1327.17	ENSG00000204438	GPANK1	G-patch domain and ankyrin repeats 1 [Source:HGNC Symbol;Acc:HGNC:13920]
ENSG00000171097	420.598	-0.920683	0.100434	-9.16709	4.85955e-20	5.52204e-19	0.00756635	598.333	329.333	ENSG00000171097	KYAT1	kynurenine aminotransferase 1 [Source:HGNC Symbol;Acc:HGNC:1564]
ENSG00000110628	339.51	-1.41198	0.154064	-9.16488	4.96008e-20	5.63167e-19	0.0201302	568.667	221.833	ENSG00000110628	SLC22A18	solute carrier family 22 member 18 [Source:HGNC Symbol;Acc:HGNC:10964]
ENSG00000122133	31.7185	-2.62575	0.286618	-9.16115	5.13453e-20	5.82499e-19	0.0412524	70.3333	11.8333	ENSG00000122133	PAEP	progestagen associated endometrial protein [Source:HGNC Symbol;Acc:HGNC:8573]
ENSG00000121741	2237.89	-0.469431	0.0512523	-9.15922	5.22716e-20	5.92525e-19	0.00210996	2686.33	2014	ENSG00000121741	ZMYM2	zinc finger MYM-type containing 2 [Source:HGNC Symbol;Acc:HGNC:12989]
ENSG00000148339	627.281	0.614665	0.067129	9.15647	5.36204e-20	6.07319e-19	0.00239404	453	719.833	ENSG00000148339	SLC25A25	solute carrier family 25 member 25 [Source:HGNC Symbol;Acc:HGNC:20663]
ENSG00000163513	13913.2	-0.416003	0.0454349	-9.15603	5.38404e-20	6.09315e-19	0.00191651	16357	12709.8	ENSG00000163513	TGFBR2	transforming growth factor beta receptor 2 [Source:HGNC Symbol;Acc:HGNC:11773]
ENSG00000215305	904.503	-0.502504	0.0548886	-9.15498	5.4366e-20	6.14764e-19	0.0018748	1100	806.167	ENSG00000215305	VPS16	VPS16, CORVET/HOPS core subunit [Source:HGNC Symbol;Acc:HGNC:14584]
ENSG00000100416	2107.47	0.442931	0.0484131	9.14898	5.74739e-20	6.4938e-19	0.00170859	1661.67	2345.17	ENSG00000100416	TRMU	tRNA 5-methylaminomethyl-2-thiouridylate methyltransferase [Source:HGNC Symbol;Acc:HGNC:25481]
ENSG00000105705	1363.98	0.432471	0.0472835	9.14635	5.88909e-20	6.64851e-19	0.00131136	1081.33	1515	ENSG00000105705	SUGP1	SURP and G-patch domain containing 1 [Source:HGNC Symbol;Acc:HGNC:18643]
ENSG00000134698	869.632	-0.637062	0.0696714	-9.14381	6.02877e-20	6.80069e-19	0.00361865	1116	745.167	ENSG00000134698	AGO4	argonaute 4, RISC catalytic component [Source:HGNC Symbol;Acc:HGNC:18424]
ENSG00000184216	8634.36	0.386521	0.0423109	9.13526	6.52505e-20	7.35455e-19	0.0015899	7008.67	9510.83	ENSG00000184216	IRAK1	interleukin 1 receptor associated kinase 1 [Source:HGNC Symbol;Acc:HGNC:6112]
ENSG00000119640	518.759	-0.776044	0.085009	-9.12897	6.91566e-20	7.78851e-19	0.00520957	701	425.833	ENSG00000119640	ACYP1	acylphosphatase 1 [Source:HGNC Symbol;Acc:HGNC:179]
ENSG00000167384	415.851	0.794923	0.087086	9.12802	6.97606e-20	7.85019e-19	0.00416531	273	492	ENSG00000167384	ZNF180	zinc finger protein 180 [Source:HGNC Symbol;Acc:HGNC:12970]
ENSG00000188026	391.84	-1.01585	0.111402	-9.11876	7.59912e-20	8.54115e-19	0.00964692	577.333	297.5	ENSG00000188026	RILPL1	Rab interacting lysosomal protein like 1 [Source:HGNC Symbol;Acc:HGNC:26814]
ENSG00000114626	869.865	-0.744503	0.0816457	-9.11871	7.60236e-20	8.54115e-19	0.00536891	1162	721.333	ENSG00000114626	ABTB1	ankyrin repeat and BTB domain containing 1 [Source:HGNC Symbol;Acc:HGNC:18275]
ENSG00000075420	9451.11	-0.493112	0.0540867	-9.11706	7.71872e-20	8.66489e-19	0.00271323	11462.7	8449.5	ENSG00000075420	FNDC3B	fibronectin type III domain containing 3B [Source:HGNC Symbol;Acc:HGNC:24670]
ENSG00000069849	4513.61	0.401645	0.0440663	9.11456	7.89904e-20	8.86017e-19	0.00161543	3635.33	4982.17	ENSG00000069849	ATP1B3	ATPase Na+/K+ transporting subunit beta 3 [Source:HGNC Symbol;Acc:HGNC:806]
ENSG00000102978	3006.12	0.531596	0.058326	9.11423	7.9229e-20	8.87977e-19	0.00287634	2265.33	3398.67	ENSG00000102978	POLR2C	RNA polymerase II subunit C [Source:HGNC Symbol;Acc:HGNC:9189]
ENSG00000128872	326.663	-1.01115	0.110957	-9.11303	8.01149e-20	8.97184e-19	0.00909599	480.333	247.667	ENSG00000128872	TMOD2	tropomodulin 2 [Source:HGNC Symbol;Acc:HGNC:11872]
ENSG00000179094	591.014	-0.580655	0.0637214	-9.11241	8.05723e-20	9.01581e-19	0.00235454	742	514.833	ENSG00000179094	PER1	period circadian regulator 1 [Source:HGNC Symbol;Acc:HGNC:8845]
ENSG00000198492	3985.14	0.40416	0.0443836	9.10608	8.54112e-20	9.54959e-19	0.00160899	3208.67	4404.33	ENSG00000198492	YTHDF2	YTH N6-methyladenosine RNA binding protein 2 [Source:HGNC Symbol;Acc:HGNC:31675]
ENSG00000119681	680.739	-0.631697	0.0694334	-9.09788	9.21085e-20	1.02901e-18	0.00329639	873.333	584.333	ENSG00000119681	LTBP2	latent transforming growth factor beta binding protein 2 [Source:HGNC Symbol;Acc:HGNC:6715]
ENSG00000164109	2681.74	0.40929	0.0450045	9.09443	9.50854e-20	1.06142e-18	0.00152362	2151.67	2964.67	ENSG00000164109	MAD2L1	mitotic arrest deficient 2 like 1 [Source:HGNC Symbol;Acc:HGNC:6763]
ENSG00000142207	4027.87	0.346448	0.0381114	9.09041	9.86668e-20	1.10051e-18	0.00111984	3334	4404.67	ENSG00000142207	URB1	URB1 ribosome biogenesis homolog [Source:HGNC Symbol;Acc:HGNC:17344]
ENSG00000175221	1974.72	0.437615	0.0481972	9.07967	1.08904e-19	1.21373e-18	0.0016531	1563	2195.83	ENSG00000175221	MED16	mediator complex subunit 16 [Source:HGNC Symbol;Acc:HGNC:17556]
ENSG00000131470	566.931	0.844812	0.0930459	9.07952	1.09058e-19	1.21447e-18	0.00598218	361.667	674.667	ENSG00000131470	PSMC3IP	PSMC3 interacting protein [Source:HGNC Symbol;Acc:HGNC:17928]
ENSG00000005238	793.99	-0.604193	0.0665514	-9.07859	1.0999e-19	1.22387e-18	0.00310698	1006.67	686.667	ENSG00000005238	FAM214B	family with sequence similarity 214 member B [Source:HGNC Symbol;Acc:HGNC:25666]
ENSG00000146233	91.3281	-1.39874	0.154196	-9.07118	1.17739e-19	1.30823e-18	0.0129126	152.667	60	ENSG00000146233	CYP39A1	cytochrome P450 family 39 subfamily A member 1 [Source:HGNC Symbol;Acc:HGNC:17449]
ENSG00000123191	505.94	-0.731771	0.0806701	-9.07116	1.1776e-19	1.30823e-18	0.0044694	672.667	420.667	ENSG00000123191	ATP7B	ATPase copper transporting beta [Source:HGNC Symbol;Acc:HGNC:870]
ENSG00000124224	782.046	-0.893593	0.098522	-9.06998	1.19035e-19	1.32134e-18	0.00818275	1103	618.333	ENSG00000124224	PPP4R1L	protein phosphatase 4 regulatory subunit 1 like (pseudogene) [Source:HGNC Symbol;Acc:HGNC:15755]
ENSG00000218336	4411.07	-0.674081	0.0743547	-9.06575	1.23748e-19	1.37257e-18	0.00510696	5741.67	3738.83	ENSG00000218336	TENM3	teneurin transmembrane protein 3 [Source:HGNC Symbol;Acc:HGNC:29944]
ENSG00000145868	2326.11	-0.410077	0.0452571	-9.06107	1.29178e-19	1.43165e-18	0.0015664	2723.33	2128.67	ENSG00000145868	FBXO38	F-box protein 38 [Source:HGNC Symbol;Acc:HGNC:28844]
ENSG00000164151	4990.98	0.268718	0.0296587	9.06035	1.30027e-19	1.43992e-18	0.000627762	4294.67	5371.67	ENSG00000164151	ICE1	interactor of little elongation complex ELL subunit 1 [Source:HGNC Symbol;Acc:HGNC:29154]
ENSG00000167515	970.09	0.594594	0.0656307	9.05969	1.30816e-19	1.44751e-18	0.0028959	708.667	1109.33	ENSG00000167515	TRAPPC2L	trafficking protein particle complex 2 like [Source:HGNC Symbol;Acc:HGNC:30887]
ENSG00000188549	3276.29	0.33149	0.036613	9.0539	1.37949e-19	1.52522e-18	0.000950511	2731	3570.67	ENSG00000188549	CCDC9B	coiled-coil domain containing 9B [Source:HGNC Symbol;Acc:HGNC:33488]
ENSG00000078699	1693.76	-0.444983	0.0491489	-9.05379	1.38095e-19	1.52522e-18	0.00177224	2011.33	1535.67	ENSG00000078699	CBFA2T2	CBFA2/RUNX1 translocation partner 2 [Source:HGNC Symbol;Acc:HGNC:1536]
ENSG00000120533	2252.45	0.537199	0.0593346	9.05373	1.38168e-19	1.52522e-18	0.00285809	1695.67	2550.5	ENSG00000120533	ENY2	ENY2, transcription and export complex 2 subunit [Source:HGNC Symbol;Acc:HGNC:24449]
ENSG00000170340	1113.35	-0.436467	0.0482293	-9.04984	1.43184e-19	1.57933e-18	0.00139909	1318.33	1011	ENSG00000170340	B3GNT2	UDP-GlcNAc:betaGal beta-1,3-N-acetylglucosaminyltransferase 2 [Source:HGNC Symbol;Acc:HGNC:15629]
ENSG00000126773	14937.1	0.646081	0.0714061	9.04799	1.45627e-19	1.60501e-18	0.00481723	10603	17231.3	ENSG00000126773	PCNX4	pecanex 4 [Source:HGNC Symbol;Acc:HGNC:20349]
ENSG00000129250	9515.19	0.383758	0.0424193	9.0468	1.47226e-19	1.62134e-18	0.00161089	7737.33	10472.2	ENSG00000129250	KIF1C	kinesin family member 1C [Source:HGNC Symbol;Acc:HGNC:6317]
ENSG00000117751	1606.62	0.429949	0.0475732	9.03764	1.60089e-19	1.76161e-18	0.00146476	1276	1783.67	ENSG00000117751	PPP1R8	protein phosphatase 1 regulatory subunit 8 [Source:HGNC Symbol;Acc:HGNC:9296]
ENSG00000120334	839.638	0.725541	0.0802985	9.03555	1.63182e-19	1.79422e-18	0.00468915	572	981.5	ENSG00000120334	CENPL	centromere protein L [Source:HGNC Symbol;Acc:HGNC:17879]
ENSG00000162976	392.024	-0.864253	0.0956975	-9.03109	1.69964e-19	1.86733e-18	0.00651526	547.667	312.833	ENSG00000162976	PQLC3	PQ loop repeat containing 3 [Source:HGNC Symbol;Acc:HGNC:28503]
ENSG00000125835	8062	0.398525	0.0441342	9.02984	1.7192e-19	1.88733e-18	0.00173158	6504.67	8899.83	ENSG00000125835	SNRPB	small nuclear ribonucleoprotein polypeptides B and B1 [Source:HGNC Symbol;Acc:HGNC:11153]
ENSG00000167632	1033.54	-0.606843	0.0672263	-9.02686	1.76674e-19	1.93798e-18	0.00346035	1312.67	893.833	ENSG00000167632	TRAPPC9	trafficking protein particle complex 9 [Source:HGNC Symbol;Acc:HGNC:30832]
ENSG00000103978	1552.5	0.427075	0.0473203	9.02521	1.79357e-19	1.96586e-18	0.0014177	1235.33	1723	ENSG00000103978	TMEM87A	transmembrane protein 87A [Source:HGNC Symbol;Acc:HGNC:24522]
ENSG00000110844	163.08	-1.25724	0.139322	-9.02394	1.81443e-19	1.98717e-18	0.0131403	259.667	113.167	ENSG00000110844	PRPF40B	pre-mRNA processing factor 40 homolog B [Source:HGNC Symbol;Acc:HGNC:25031]
ENSG00000221829	2597.73	0.346384	0.0383854	9.02384	1.81613e-19	1.98746e-18	0.000988145	2150	2839.33	ENSG00000221829	FANCG	FA complementation group G [Source:HGNC Symbol;Acc:HGNC:3588]
ENSG00000116062	9223.39	0.331029	0.0366884	9.0227	1.83515e-19	2.0067e-18	0.0011735	7697	10047.3	ENSG00000116062	MSH6	mutS homolog 6 [Source:HGNC Symbol;Acc:HGNC:7329]
ENSG00000122299	2964.25	0.569693	0.0631416	9.02246	1.83912e-19	2.00947e-18	0.00342759	2189	3374.17	ENSG00000122299	ZC3H7A	zinc finger CCCH-type containing 7A [Source:HGNC Symbol;Acc:HGNC:30959]
ENSG00000138757	6712.52	0.282557	0.0313178	9.02223	1.84305e-19	2.01218e-18	0.000780074	5738.67	7241.17	ENSG00000138757	G3BP2	G3BP stress granule assembly factor 2 [Source:HGNC Symbol;Acc:HGNC:30291]
ENSG00000166851	6022.14	0.506628	0.0561609	9.02101	1.86361e-19	2.03303e-18	0.00283643	4604.67	6783.33	ENSG00000166851	PLK1	polo like kinase 1 [Source:HGNC Symbol;Acc:HGNC:9077]
ENSG00000070814	9196.27	0.434075	0.0481307	9.01867	1.9038e-19	2.07525e-18	0.00210177	7285.33	10222	ENSG00000070814	TCOF1	treacle ribosome biogenesis factor 1 [Source:HGNC Symbol;Acc:HGNC:11654]
ENSG00000010072	913.421	0.525262	0.0582624	9.01546	1.96045e-19	2.13533e-18	0.00197301	690.667	1032.33	ENSG00000010072	SPRTN	SprT-like N-terminal domain [Source:HGNC Symbol;Acc:HGNC:25356]
ENSG00000172428	871.171	0.51634	0.0572843	9.01363	1.9934e-19	2.16951e-18	0.00180612	662	983	ENSG00000172428	COPS9	COP9 signalosome subunit 9 [Source:HGNC Symbol;Acc:HGNC:21314]
ENSG00000166938	1942.11	0.525356	0.0583032	9.01075	2.04659e-19	2.22566e-18	0.00266006	1468.67	2194.33	ENSG00000166938	DIS3L	DIS3 like exosome 3'-5' exoribonuclease [Source:HGNC Symbol;Acc:HGNC:28698]
ENSG00000136709	3193.04	0.411038	0.0456175	9.01053	2.05069e-19	2.22838e-18	0.0016445	2561	3533.17	ENSG00000136709	WDR33	WD repeat domain 33 [Source:HGNC Symbol;Acc:HGNC:25651]
ENSG00000115902	1064.92	-0.704326	0.0781724	-9.0099	2.06244e-19	2.2394e-18	0.00502296	1404	894	ENSG00000115902	SLC1A4	solute carrier family 1 member 4 [Source:HGNC Symbol;Acc:HGNC:10942]
ENSG00000107949	3728.83	0.394674	0.0438078	9.0092	2.07566e-19	2.252e-18	0.00154159	3014	4113.67	ENSG00000107949	BCCIP	BRCA2 and CDKN1A interacting protein [Source:HGNC Symbol;Acc:HGNC:978]
ENSG00000132591	3169	0.391451	0.043477	9.00365	2.18331e-19	2.36695e-18	0.00146074	2565.33	3491.83	ENSG00000132591	ERAL1	Era like 12S mitochondrial rRNA chaperone 1 [Source:HGNC Symbol;Acc:HGNC:3424]
ENSG00000113460	3071.35	0.432618	0.0480647	9.00074	2.24196e-19	2.42864e-18	0.00184812	2434	3412	ENSG00000113460	BRIX1	BRX1, biogenesis of ribosomes [Source:HGNC Symbol;Acc:HGNC:24170]
ENSG00000129474	9205.94	0.510274	0.0567006	8.99944	2.26876e-19	2.4544e-18	0.002962	7012.33	10366.3	ENSG00000129474	AJUBA	ajuba LIM protein [Source:HGNC Symbol;Acc:HGNC:20250]
ENSG00000150907	747.004	-0.533163	0.0592442	-8.99941	2.26926e-19	2.4544e-18	0.00214227	920.333	660.333	ENSG00000150907	FOXO1	forkhead box O1 [Source:HGNC Symbol;Acc:HGNC:3819]
ENSG00000120899	69.0049	-1.49139	0.165739	-8.99842	2.28994e-19	2.47484e-18	0.013121	118.333	43.6667	ENSG00000120899	PTK2B	protein tyrosine kinase 2 beta [Source:HGNC Symbol;Acc:HGNC:9612]
ENSG00000121671	391.374	-0.70312	0.0782458	-8.98604	2.56301e-19	2.76781e-18	0.0035725	514.667	328.5	ENSG00000121671	CRY2	cryptochrome circadian regulator 2 [Source:HGNC Symbol;Acc:HGNC:2385]
ENSG00000155893	280.878	-1.13669	0.126534	-8.98329	2.62795e-19	2.83574e-18	0.0122013	431	204	ENSG00000155893	PXYLP1	2-phosphoxylose phosphatase 1 [Source:HGNC Symbol;Acc:HGNC:26303]
ENSG00000106789	1012.83	-0.526011	0.0585695	-8.98097	2.68393e-19	2.8939e-18	0.00238781	1244	896.667	ENSG00000106789	CORO2A	coronin 2A [Source:HGNC Symbol;Acc:HGNC:2255]
ENSG00000185880	412.379	-0.768187	0.0855397	-8.98047	2.69611e-19	2.90478e-18	0.00484818	556.667	339	ENSG00000185880	TRIM69	tripartite motif containing 69 [Source:HGNC Symbol;Acc:HGNC:17857]
ENSG00000100722	3811.68	0.331932	0.0369709	8.9782	2.75229e-19	2.96302e-18	0.00102321	3179.67	4154.33	ENSG00000100722	ZC3H14	zinc finger CCCH-type containing 14 [Source:HGNC Symbol;Acc:HGNC:20509]
ENSG00000197903	9817.74	0.381493	0.042517	8.97272	2.89287e-19	3.11196e-18	0.00162259	7986	10804	ENSG00000197903	HIST1H2BK	histone cluster 1 H2B family member k [Source:HGNC Symbol;Acc:HGNC:13954]
ENSG00000125885	3671.02	0.42245	0.0471184	8.96571	3.08292e-19	3.31384e-18	0.00182332	2923	4071.17	ENSG00000125885	MCM8	minichromosome maintenance 8 homologous recombination repair factor [Source:HGNC Symbol;Acc:HGNC:16147]
ENSG00000187764	2353.94	-0.548854	0.0612566	-8.95992	3.24922e-19	3.48991e-18	0.00321575	2918.67	2070	ENSG00000187764	SEMA4D	semaphorin 4D [Source:HGNC Symbol;Acc:HGNC:10732]
ENSG00000196747	3472.37	0.411309	0.0459064	8.95972	3.25504e-19	3.49346e-18	0.00169846	2786	3843.33	ENSG00000196747	HIST1H2AI	histone cluster 1 H2A family member i [Source:HGNC Symbol;Acc:HGNC:4725]
ENSG00000057294	3104.87	0.530299	0.0592059	8.95685	3.34089e-19	3.58283e-18	0.00298837	2341	3508.5	ENSG00000057294	PKP2	plakophilin 2 [Source:HGNC Symbol;Acc:HGNC:9024]
ENSG00000179271	2600.8	0.41371	0.0461989	8.95498	3.39799e-19	3.64126e-18	0.00161456	2082	2879.5	ENSG00000179271	GADD45GIP1	GADD45G interacting protein 1 [Source:HGNC Symbol;Acc:HGNC:29996]
ENSG00000033327	2434.8	-0.605611	0.0676316	-8.95456	3.41101e-19	3.65241e-18	0.00402052	3083.33	2106.67	ENSG00000033327	GAB2	GRB2 associated binding protein 2 [Source:HGNC Symbol;Acc:HGNC:14458]
ENSG00000204103	52.3659	-2.01462	0.224994	-8.95409	3.42547e-19	3.66507e-18	0.029495	102.333	26.3333	ENSG00000204103	MAFB	MAF bZIP transcription factor B [Source:HGNC Symbol;Acc:HGNC:6408]
ENSG00000135414	909.128	0.598637	0.0668905	8.94952	3.57038e-19	3.81718e-18	0.0029711	662.667	1040.5	ENSG00000135414	GDF11	growth differentiation factor 11 [Source:HGNC Symbol;Acc:HGNC:4216]
ENSG00000204569	5351.3	0.514641	0.0575064	8.94927	3.57827e-19	3.82268e-18	0.00295843	4071	6033.67	ENSG00000204569	PPP1R10	protein phosphatase 1 regulatory subunit 10 [Source:HGNC Symbol;Acc:HGNC:9284]
ENSG00000141560	1019.71	0.615431	0.0687984	8.94542	3.70527e-19	3.95532e-18	0.0033567	736.667	1170.17	ENSG00000141560	FN3KRP	fructosamine 3 kinase related protein [Source:HGNC Symbol;Acc:HGNC:25700]
ENSG00000100028	3384.03	0.405972	0.0454583	8.93064	4.2355e-19	4.51787e-18	0.00165114	2721.33	3739.5	ENSG00000100028	SNRPD3	small nuclear ribonucleoprotein D3 polypeptide [Source:HGNC Symbol;Acc:HGNC:11160]
ENSG00000167491	11479.4	0.460296	0.0515542	8.92839	4.32254e-19	4.60718e-18	0.00245355	8980.33	12821	ENSG00000167491	GATAD2A	GATA zinc finger domain containing 2A [Source:HGNC Symbol;Acc:HGNC:29989]
ENSG00000120889	7059.62	-0.625202	0.0700508	-8.92498	4.45793e-19	4.74784e-18	0.00458628	9016	6071	ENSG00000120889	TNFRSF10B	TNF receptor superfamily member 10b [Source:HGNC Symbol;Acc:HGNC:11905]
ENSG00000123643	1241.12	0.412073	0.0461738	8.9244	4.48129e-19	4.76908e-18	0.00113501	994.333	1373.67	ENSG00000123643	SLC36A1	solute carrier family 36 member 1 [Source:HGNC Symbol;Acc:HGNC:18761]
ENSG00000136436	3918.19	-0.300311	0.0336853	-8.9152	4.86941e-19	5.17816e-18	0.000847645	4379.67	3691.83	ENSG00000136436	CALCOCO2	calcium binding and coiled-coil domain 2 [Source:HGNC Symbol;Acc:HGNC:29912]
ENSG00000152527	447.302	-0.982085	0.11016	-8.91507	4.87503e-19	5.18019e-18	0.00966362	650.333	342.833	ENSG00000152527	PLEKHH2	pleckstrin homology, MyTH4 and FERM domain containing H2 [Source:HGNC Symbol;Acc:HGNC:30506]
ENSG00000228672	192.588	-1.13747	0.127593	-8.91483	4.88565e-19	5.18751e-18	0.0109999	295.667	139.667	ENSG00000228672	PROB1	proline rich basic protein 1 [Source:HGNC Symbol;Acc:HGNC:41906]
ENSG00000184207	1030.8	0.532937	0.0597949	8.91273	4.97891e-19	5.2825e-18	0.00229042	776	1166.17	ENSG00000184207	PGP	phosphoglycolate phosphatase [Source:HGNC Symbol;Acc:HGNC:8909]
ENSG00000175305	726.929	1.2602	0.141419	8.91107	5.05428e-19	5.35838e-18	0.0170408	368	914.333	ENSG00000175305	CCNE2	cyclin E2 [Source:HGNC Symbol;Acc:HGNC:1590]
ENSG00000136731	7342.89	-0.381925	0.0428629	-8.91039	5.08522e-19	5.38708e-18	0.00163759	8502.33	6774.5	ENSG00000136731	UGGT1	UDP-glucose glycoprotein glucosyltransferase 1 [Source:HGNC Symbol;Acc:HGNC:15663]
ENSG00000278053	4232.95	0.334709	0.0375727	8.9083	5.18213e-19	5.48557e-18	0.00109495	3524	4615.17	ENSG00000278053	DDX52	DExD-box helicase 52 [Source:HGNC Symbol;Acc:HGNC:20038]
ENSG00000197343	2697.87	0.490424	0.0550791	8.90399	5.3873e-19	5.69842e-18	0.00248372	2075	3028.67	ENSG00000197343	ZNF655	zinc finger protein 655 [Source:HGNC Symbol;Acc:HGNC:30899]
ENSG00000165606	56.9112	2.4508	0.275267	8.90333	5.41978e-19	5.72843e-18	0.0209289	14	79.3333	ENSG00000165606	DRGX	dorsal root ganglia homeobox [Source:HGNC Symbol;Acc:HGNC:21536]
ENSG00000176087	3766.66	0.421835	0.047382	8.90285	5.44307e-19	5.74867e-18	0.0018552	3006.33	4174.17	ENSG00000176087	SLC35A4	solute carrier family 35 member A4 [Source:HGNC Symbol;Acc:HGNC:20753]
ENSG00000231925	11315.8	-0.38844	0.0436318	-8.90268	5.45159e-19	5.7533e-18	0.00174645	13148	10415.7	ENSG00000231925	TAPBP	TAP binding protein [Source:HGNC Symbol;Acc:HGNC:11566]
ENSG00000104852	7100.41	0.282649	0.0317631	8.89865	5.65316e-19	5.96151e-18	0.000815926	6064.33	7661.33	ENSG00000104852	SNRNP70	small nuclear ribonucleoprotein U1 subunit 70 [Source:HGNC Symbol;Acc:HGNC:11150]
ENSG00000096070	5155.86	0.716382	0.0805209	8.89685	5.74528e-19	6.05407e-18	0.00598557	3535.67	6014.33	ENSG00000096070	BRPF3	bromodomain and PHD finger containing 3 [Source:HGNC Symbol;Acc:HGNC:14256]
ENSG00000172534	13964	0.51443	0.0578327	8.89514	5.8346e-19	6.14354e-18	0.00312984	10623.3	15752.8	ENSG00000172534	HCFC1	host cell factor C1 [Source:HGNC Symbol;Acc:HGNC:4839]
ENSG00000242802	1144.81	0.594502	0.0668447	8.89378	5.90638e-19	6.21443e-18	0.00324024	836.667	1309.83	ENSG00000242802	AP5Z1	adaptor related protein complex 5 subunit zeta 1 [Source:HGNC Symbol;Acc:HGNC:22197]
ENSG00000168806	519.37	0.821268	0.0923644	8.8916	6.02361e-19	6.33298e-18	0.00567127	336.333	616.5	ENSG00000168806	LCMT2	leucine carboxyl methyltransferase 2 [Source:HGNC Symbol;Acc:HGNC:17558]
ENSG00000101452	1230.9	0.437388	0.0492376	8.88321	6.49605e-19	6.82453e-18	0.0014008	973.667	1369.17	ENSG00000101452	DHX35	DEAH-box helicase 35 [Source:HGNC Symbol;Acc:HGNC:15861]
ENSG00000178343	497.764	-0.754152	0.0849458	-8.87803	6.80525e-19	7.14397e-18	0.0051238	668.667	411.167	ENSG00000178343	SHISA3	shisa family member 3 [Source:HGNC Symbol;Acc:HGNC:25159]
ENSG00000117305	450.578	-0.750306	0.0845263	-8.8766	6.89367e-19	7.23134e-18	0.00486541	604	372.667	ENSG00000117305	HMGCL	3-hydroxy-3-methylglutaryl-CoA lyase [Source:HGNC Symbol;Acc:HGNC:5005]
ENSG00000242247	1636.11	-0.451642	0.0508921	-8.8745	7.02497e-19	7.36352e-18	0.00192086	1948.67	1478.33	ENSG00000242247	ARFGAP3	ADP ribosylation factor GTPase activating protein 3 [Source:HGNC Symbol;Acc:HGNC:661]
ENSG00000058804	6822.38	0.304059	0.0342653	8.87366	7.07797e-19	7.41349e-18	0.000967412	5770.33	7394	ENSG00000058804	NDC1	NDC1 transmembrane nucleoporin [Source:HGNC Symbol;Acc:HGNC:25525]
ENSG00000108883	10194.1	0.342539	0.0386042	8.87309	7.11424e-19	7.44588e-18	0.00132314	8462.33	11132.5	ENSG00000108883	EFTUD2	elongation factor Tu GTP binding domain containing 2 [Source:HGNC Symbol;Acc:HGNC:30858]
ENSG00000117877	298.447	0.915245	0.103158	8.8723	7.16536e-19	7.49375e-18	0.00566044	183.333	359.167	ENSG00000117877	CD3EAP	CD3e molecule associated protein [Source:HGNC Symbol;Acc:HGNC:24219]
ENSG00000135677	7608.68	-0.353365	0.0398313	-8.87154	7.21385e-19	7.53879e-18	0.00140061	8709.67	7068	ENSG00000135677	GNS	glucosamine (N-acetyl)-6-sulfatase [Source:HGNC Symbol;Acc:HGNC:4422]
ENSG00000160181	53.8659	-1.90542	0.214787	-8.87124	7.23362e-19	7.55379e-18	0.0261717	103.333	28.5	ENSG00000160181	TFF2	trefoil factor 2 [Source:HGNC Symbol;Acc:HGNC:11756]
ENSG00000007392	1913.64	0.501439	0.0565248	8.87112	7.24126e-19	7.5561e-18	0.00245974	1464	2152.17	ENSG00000007392	LUC7L	LUC7 like [Source:HGNC Symbol;Acc:HGNC:6723]
ENSG00000156304	2860.45	0.32588	0.0367431	8.86916	7.36981e-19	7.68448e-18	0.000911307	2393	3114	ENSG00000156304	SCAF4	SR-related CTD associated factor 4 [Source:HGNC Symbol;Acc:HGNC:19304]
ENSG00000172830	519.081	-0.679708	0.0766422	-8.86858	7.40813e-19	7.71865e-18	0.00389899	677.333	438.667	ENSG00000172830	SSH3	slingshot protein phosphatase 3 [Source:HGNC Symbol;Acc:HGNC:30581]
ENSG00000275714	2466.59	0.588653	0.0663826	8.86758	7.47511e-19	7.78261e-18	0.00374641	1806.67	2820.17	ENSG00000275714	HIST1H3A	histone cluster 1 H3 family member a [Source:HGNC Symbol;Acc:HGNC:4766]
ENSG00000116922	697.096	0.629499	0.0709941	8.86692	7.51978e-19	7.82327e-18	0.00309183	499.667	802.5	ENSG00000116922	C1orf109	chromosome 1 open reading frame 109 [Source:HGNC Symbol;Acc:HGNC:26039]
ENSG00000167642	3442.04	-0.354568	0.0399884	-8.86678	7.52884e-19	7.82684e-18	0.00126274	3939	3196	ENSG00000167642	SPINT2	serine peptidase inhibitor, Kunitz type 2 [Source:HGNC Symbol;Acc:HGNC:11247]
ENSG00000139620	991.958	0.552446	0.0623204	8.86461	7.67701e-19	7.97493e-18	0.00253391	739.667	1125.83	ENSG00000139620	KANSL2	KAT8 regulatory NSL complex subunit 2 [Source:HGNC Symbol;Acc:HGNC:26024]
ENSG00000255346	26.3887	-2.97175	0.335291	-8.8632	7.77467e-19	8.07035e-18	0.0564051	62	8.16667	ENSG00000255346	NOX5	NADPH oxidase 5 [Source:HGNC Symbol;Acc:HGNC:14874]
ENSG00000182307	2058.98	0.411892	0.0464908	8.85963	8.0278e-19	8.3269e-18	0.00152601	1649.33	2277	ENSG00000182307	C8orf33	chromosome 8 open reading frame 33 [Source:HGNC Symbol;Acc:HGNC:26104]
ENSG00000186141	1421.22	0.543936	0.0614003	8.85884	8.0849e-19	8.37988e-18	0.00278888	1065.33	1611.17	ENSG00000186141	POLR3C	RNA polymerase III subunit C [Source:HGNC Symbol;Acc:HGNC:30076]
ENSG00000180573	8471.11	0.49744	0.056182	8.85408	8.43765e-19	8.73899e-18	0.00289531	6501.67	9523.67	ENSG00000180573	HIST1H2AC	histone cluster 1 H2A family member c [Source:HGNC Symbol;Acc:HGNC:4733]
ENSG00000103249	2548.5	0.314862	0.0355621	8.85387	8.45332e-19	8.74871e-18	0.000783459	2144	2767.67	ENSG00000103249	CLCN7	chloride voltage-gated channel 7 [Source:HGNC Symbol;Acc:HGNC:2025]
ENSG00000067208	5309.99	-0.376327	0.0425487	-8.84463	9.18345e-19	9.4973e-18	0.00156272	6131.67	4904.83	ENSG00000067208	EVI5	ecotropic viral integration site 5 [Source:HGNC Symbol;Acc:HGNC:3501]
ENSG00000249242	125.762	-1.34595	0.15218	-8.84443	9.1998e-19	9.50714e-18	0.0150664	206.333	84.3333	ENSG00000249242	TMEM150C	transmembrane protein 150C [Source:HGNC Symbol;Acc:HGNC:37263]
ENSG00000109686	2880.16	-0.356207	0.0402772	-8.84389	9.24453e-19	9.54628e-18	0.00123173	3299	2674.5	ENSG00000109686	SH3D19	SH3 domain containing 19 [Source:HGNC Symbol;Acc:HGNC:30418]
ENSG00000097033	8344.5	-0.232605	0.0263046	-8.84276	9.33865e-19	9.63633e-18	0.000549538	9061	8004.17	ENSG00000097033	SH3GLB1	SH3 domain containing GRB2 like, endophilin B1 [Source:HGNC Symbol;Acc:HGNC:10833]
ENSG00000029725	4631.07	0.280374	0.0317108	8.8416	9.43538e-19	9.72892e-18	0.000731047	3961	4994	ENSG00000029725	RABEP1	rabaptin, RAB GTPase binding effector protein 1 [Source:HGNC Symbol;Acc:HGNC:17677]
ENSG00000211460	3656.42	0.281293	0.0318406	8.83441	1.0063e-18	1.03684e-17	0.000676207	3125.67	3943.67	ENSG00000211460	TSN	translin [Source:HGNC Symbol;Acc:HGNC:12379]
ENSG00000107643	3289.85	0.361463	0.0409159	8.83429	1.00733e-18	1.03713e-17	0.00126934	2704.33	3605	ENSG00000107643	MAPK8	mitogen-activated protein kinase 8 [Source:HGNC Symbol;Acc:HGNC:6881]
ENSG00000185753	1575.89	-0.398489	0.045108	-8.83409	1.00913e-18	1.03822e-17	0.00136118	1835.33	1446	ENSG00000185753	CXorf38	chromosome X open reading frame 38 [Source:HGNC Symbol;Acc:HGNC:28589]
ENSG00000183098	659.484	-0.984496	0.111465	-8.83232	1.02527e-18	1.05405e-17	0.0105843	963.667	504.667	ENSG00000183098	GPC6	glypican 6 [Source:HGNC Symbol;Acc:HGNC:4454]
ENSG00000146731	13104.8	0.348934	0.0395176	8.82984	1.04825e-18	1.07687e-17	0.00141573	10841	14329.3	ENSG00000146731	CCT6A	chaperonin containing TCP1 subunit 6A [Source:HGNC Symbol;Acc:HGNC:1620]
ENSG00000101191	5623.58	0.663811	0.0752063	8.82654	1.07965e-18	1.10831e-17	0.00521496	3957	6505.5	ENSG00000101191	DIDO1	death inducer-obliterator 1 [Source:HGNC Symbol;Acc:HGNC:2680]
ENSG00000177169	1316.13	-0.455313	0.0516159	-8.82119	1.13249e-18	1.1617e-17	0.00185456	1570.67	1188.67	ENSG00000177169	ULK1	unc-51 like autophagy activating kinase 1 [Source:HGNC Symbol;Acc:HGNC:12558]
ENSG00000163624	97.0748	-1.34999	0.153122	-8.8164	1.18198e-18	1.21157e-17	0.0132086	159.333	64.8333	ENSG00000163624	CDS1	CDP-diacylglycerol synthase 1 [Source:HGNC Symbol;Acc:HGNC:1800]
ENSG00000196950	4680.44	-0.644951	0.0732176	-8.8087	1.2661e-18	1.29685e-17	0.00495704	6025.67	4001.33	ENSG00000196950	SLC39A10	solute carrier family 39 member 10 [Source:HGNC Symbol;Acc:HGNC:20861]
ENSG00000278845	3212.15	0.384424	0.0436604	8.80488	1.3099e-18	1.34072e-17	0.00148165	2608.67	3534.67	ENSG00000278845	MRPL45	mitochondrial ribosomal protein L45 [Source:HGNC Symbol;Acc:HGNC:16651]
ENSG00000198648	2179.96	-0.566902	0.0643934	-8.80372	1.32352e-18	1.35367e-17	0.00356422	2721	1907.67	ENSG00000198648	STK39	serine/threonine kinase 39 [Source:HGNC Symbol;Acc:HGNC:17717]
ENSG00000131849	225.423	1.2392	0.140802	8.80105	1.35544e-18	1.38529e-17	0.0120996	115.667	283	ENSG00000131849	ZNF132	zinc finger protein 132 [Source:HGNC Symbol;Acc:HGNC:12916]
ENSG00000184470	1388.94	0.593344	0.0674408	8.798	1.39279e-18	1.42242e-17	0.00350233	1012.67	1587.33	ENSG00000184470	TXNRD2	thioredoxin reductase 2 [Source:HGNC Symbol;Acc:HGNC:18155]
ENSG00000277363	260.122	-0.804759	0.0915587	-8.78954	1.50173e-18	1.53256e-17	0.00460233	355.333	211.5	ENSG00000277363	SRCIN1	SRC kinase signaling inhibitor 1 [Source:HGNC Symbol;Acc:HGNC:29506]
ENSG00000100307	482.304	-0.712051	0.0810121	-8.78944	1.50308e-18	1.53281e-17	0.00443321	637.333	404	ENSG00000100307	CBX7	chromobox 7 [Source:HGNC Symbol;Acc:HGNC:1557]
ENSG00000129187	4197.11	0.306437	0.0348683	8.7884	1.51711e-18	1.54599e-17	0.000906731	3547	4549.83	ENSG00000129187	DCTD	dCMP deaminase [Source:HGNC Symbol;Acc:HGNC:2710]
ENSG00000179335	3433.92	-0.328015	0.0373383	-8.78494	1.56444e-18	1.59306e-17	0.001064	3884.33	3210.83	ENSG00000179335	CLK3	CDC like kinase 3 [Source:HGNC Symbol;Acc:HGNC:2071]
ENSG00000148926	2200.33	0.908427	0.103433	8.7828	1.59452e-18	1.62249e-17	0.00966237	1360	2642.17	ENSG00000148926	ADM	adrenomedullin [Source:HGNC Symbol;Acc:HGNC:259]
ENSG00000125247	629.132	-0.718223	0.0817847	-8.78188	1.60761e-18	1.63462e-17	0.00499144	832.333	525.667	ENSG00000125247	TMTC4	transmembrane and tetratricopeptide repeat containing 4 [Source:HGNC Symbol;Acc:HGNC:25904]
ENSG00000226137	386.513	-0.899462	0.102427	-8.7815	1.61308e-18	1.63898e-17	0.00776703	547.667	305	ENSG00000226137	BAIAP2-DT	BAIAP2 divergent transcript [Source:HGNC Symbol;Acc:HGNC:44342]
ENSG00000177426	1679.32	-0.576243	0.0656422	-8.77855	1.65594e-18	1.68131e-17	0.00359553	2105.33	1464.33	ENSG00000177426	TGIF1	TGFB induced factor homeobox 1 [Source:HGNC Symbol;Acc:HGNC:11776]
ENSG00000081721	978.208	0.625781	0.0713565	8.76979	1.78999e-18	1.81608e-17	0.003646	702.333	1124.67	ENSG00000081721	DUSP12	dual specificity phosphatase 12 [Source:HGNC Symbol;Acc:HGNC:3067]
ENSG00000132313	1969.27	0.511143	0.0583198	8.76449	1.87632e-18	1.90228e-17	0.00267317	1500.33	2219.83	ENSG00000132313	MRPL35	mitochondrial ribosomal protein L35 [Source:HGNC Symbol;Acc:HGNC:14489]
ENSG00000176393	2404.86	-0.336941	0.0384507	-8.76293	1.90239e-18	1.92731e-17	0.0010277	2732.33	2244	ENSG00000176393	RNPEP	arginyl aminopeptidase [Source:HGNC Symbol;Acc:HGNC:10078]
ENSG00000157895	1297.83	0.454415	0.0518692	8.76079	1.93879e-18	1.9614e-17	0.00169948	1018.67	1448.17	ENSG00000157895	C12orf43	chromosome 12 open reading frame 43 [Source:HGNC Symbol;Acc:HGNC:25719]
ENSG00000170485	2644.92	-0.420999	0.0480549	-8.76079	1.93886e-18	1.9614e-17	0.00186625	3113	2413.33	ENSG00000170485	NPAS2	neuronal PAS domain protein 2 [Source:HGNC Symbol;Acc:HGNC:7895]
ENSG00000168395	1466.26	0.570307	0.0651255	8.75704	2.00442e-18	2.02625e-17	0.00325988	1081	1671.17	ENSG00000168395	ING5	inhibitor of growth family member 5 [Source:HGNC Symbol;Acc:HGNC:19421]
ENSG00000157303	431.726	-1.06507	0.121654	-8.75487	2.0434e-18	2.06416e-17	0.0121522	647.667	321.167	ENSG00000157303	SUSD3	sushi domain containing 3 [Source:HGNC Symbol;Acc:HGNC:28391]
ENSG00000272391	3123.43	0.416125	0.0475723	8.74722	2.1868e-18	2.20742e-17	0.00181103	2498.33	3459.33	ENSG00000272391	POM121C	POM121 transmembrane nucleoporin C [Source:HGNC Symbol;Acc:HGNC:34005]
ENSG00000239672	2979.48	0.662343	0.0757628	8.74232	2.28368e-18	2.30206e-17	0.0051008	2101	3450.17	ENSG00000239672	NME1	NME/NM23 nucleoside diphosphate kinase 1 [Source:HGNC Symbol;Acc:HGNC:7849]
ENSG00000214367	884.296	0.801618	0.091694	8.74231	2.28387e-18	2.30206e-17	0.00660637	578.667	1046.83	ENSG00000214367	HAUS3	HAUS augmin like complex subunit 3 [Source:HGNC Symbol;Acc:HGNC:28719]
ENSG00000139629	2722.6	-0.686288	0.0785101	-8.7414	2.30236e-18	2.31902e-17	0.00559023	3562.33	2299.5	ENSG00000139629	GALNT6	polypeptide N-acetylgalactosaminyltransferase 6 [Source:HGNC Symbol;Acc:HGNC:4128]
ENSG00000043143	6263.23	0.491663	0.0562895	8.73453	2.4467e-18	2.46262e-17	0.00285874	4823.33	7029.67	ENSG00000043143	JADE2	jade family PHD finger 2 [Source:HGNC Symbol;Acc:HGNC:22984]
ENSG00000173706	9940.24	-0.519915	0.0595293	-8.73376	2.46333e-18	2.47757e-17	0.00331254	12166	8815.5	ENSG00000173706	HEG1	heart development protein with EGF like domains 1 [Source:HGNC Symbol;Acc:HGNC:29227]
ENSG00000273703	1841.36	0.519564	0.0594951	8.73288	2.48274e-18	2.49529e-17	0.0027631	1397	2079.17	ENSG00000273703	HIST1H2BM	histone cluster 1 H2B family member m [Source:HGNC Symbol;Acc:HGNC:4750]
ENSG00000111224	379.064	-0.697909	0.0799308	-8.73142	2.51494e-18	2.52583e-17	0.00375323	498	318.833	ENSG00000111224	PARP11	poly(ADP-ribose) polymerase family member 11 [Source:HGNC Symbol;Acc:HGNC:1186]
ENSG00000164543	2257.15	-0.382785	0.043851	-8.72924	2.56398e-18	2.57322e-17	0.00143204	2614.33	2080	ENSG00000164543	STK17A	serine/threonine kinase 17a [Source:HGNC Symbol;Acc:HGNC:11395]
ENSG00000125744	668.168	-0.681268	0.0780601	-8.72748	2.60404e-18	2.61155e-17	0.00449935	873	564.333	ENSG00000125744	RTN2	reticulon 2 [Source:HGNC Symbol;Acc:HGNC:10468]
ENSG00000240694	1633.48	-0.437141	0.0501002	-8.72533	2.65413e-18	2.65987e-17	0.00184197	1934	1482.17	ENSG00000240694	PNMA2	PNMA family member 2 [Source:HGNC Symbol;Acc:HGNC:9159]
ENSG00000105063	5579.09	0.40261	0.0461578	8.72247	2.72207e-18	2.72599e-17	0.00184455	4496.33	6163	ENSG00000105063	PPP6R1	protein phosphatase 6 regulatory subunit 1 [Source:HGNC Symbol;Acc:HGNC:29195]
ENSG00000176974	1919.33	0.52584	0.0602907	8.72175	2.73944e-18	2.74141e-17	0.0028793	1453	2169	ENSG00000176974	SHMT1	serine hydroxymethyltransferase 1 [Source:HGNC Symbol;Acc:HGNC:10850]
ENSG00000166831	169.035	-0.933844	0.107091	-8.72011	2.77924e-18	2.77924e-17	0.00573375	242.333	131.667	ENSG00000166831	RBPMS2	RNA binding protein, mRNA processing factor 2 [Source:HGNC Symbol;Acc:HGNC:19098]
ENSG00000171861	635.48	0.576094	0.0661533	8.70846	3.08024e-18	3.076e-17	0.00231987	468	724.5	ENSG00000171861	MRM3	mitochondrial rRNA methyltransferase 3 [Source:HGNC Symbol;Acc:HGNC:18485]
ENSG00000281398	494.474	0.832028	0.0955425	8.70846	3.08042e-18	3.076e-17	0.00610648	317.667	588.333	ENSG00000281398	SNHG4	small nucleolar RNA host gene 4 [Source:HGNC Symbol;Acc:HGNC:32964]
ENSG00000187741	2674.85	0.769228	0.08836	8.70561	3.15877e-18	3.15198e-17	0.00702133	1778	3149.17	ENSG00000187741	FANCA	FA complementation group A [Source:HGNC Symbol;Acc:HGNC:3582]
ENSG00000007968	383.487	0.832928	0.0957076	8.70284	3.23675e-18	3.22747e-17	0.00536338	246.333	455.5	ENSG00000007968	E2F2	E2F transcription factor 2 [Source:HGNC Symbol;Acc:HGNC:3114]
ENSG00000067533	1628.13	0.518646	0.0596034	8.70162	3.27185e-18	3.26014e-17	0.00269215	1235.33	1838.33	ENSG00000067533	RRP15	ribosomal RNA processing 15 homolog [Source:HGNC Symbol;Acc:HGNC:24255]
ENSG00000125817	4058.26	0.436592	0.0501941	8.69807	3.37585e-18	3.36136e-17	0.00213924	3214.67	4513.67	ENSG00000125817	CENPB	centromere protein B [Source:HGNC Symbol;Acc:HGNC:1852]
ENSG00000159202	6767.79	0.314891	0.0362066	8.69706	3.40597e-18	3.38893e-17	0.00109705	5696.67	7349.67	ENSG00000159202	UBE2Z	ubiquitin conjugating enzyme E2 Z [Source:HGNC Symbol;Acc:HGNC:25847]
ENSG00000126215	635.658	0.550281	0.0632756	8.69658	3.42048e-18	3.40093e-17	0.00197963	474.333	721.833	ENSG00000126215	XRCC3	X-ray repair cross complementing 3 [Source:HGNC Symbol;Acc:HGNC:12830]
ENSG00000121851	313.96	-0.791063	0.0909767	-8.69523	3.4613e-18	3.43907e-17	0.0050904	427.333	256.333	ENSG00000121851	POLR3GL	RNA polymerase III subunit G like [Source:HGNC Symbol;Acc:HGNC:28466]
ENSG00000127554	591.909	0.601852	0.069248	8.69126	3.58449e-18	3.55892e-17	0.00256569	430.333	678.167	ENSG00000127554	GFER	growth factor, augmenter of liver regeneration [Source:HGNC Symbol;Acc:HGNC:4236]
ENSG00000102934	639.364	-0.686005	0.07898	-8.6858	3.76079e-18	3.7313e-17	0.00457758	836	539.333	ENSG00000102934	PLLP	plasmolipin [Source:HGNC Symbol;Acc:HGNC:18553]
ENSG00000025039	1333.11	-0.462328	0.0532434	-8.68331	3.84421e-18	3.81022e-17	0.00202824	1595.67	1202.17	ENSG00000025039	RRAGD	Ras related GTP binding D [Source:HGNC Symbol;Acc:HGNC:19903]
ENSG00000074590	2343.63	0.652082	0.0750964	8.68326	3.84581e-18	3.81022e-17	0.00489357	1660.33	2702.5	ENSG00000074590	NUAK1	NUAK family kinase 1 [Source:HGNC Symbol;Acc:HGNC:14311]
ENSG00000254122	95.6005	-1.35607	0.156278	-8.67732	4.05207e-18	4.01172e-17	0.0140085	157.667	63.8333	ENSG00000254122	PCDHGB7	protocadherin gamma subfamily B, 7 [Source:HGNC Symbol;Acc:HGNC:8714]
ENSG00000197496	72.2525	-1.51701	0.174837	-8.67672	4.07354e-18	4.03011e-17	0.0166619	124.667	45.3333	ENSG00000197496	SLC2A10	solute carrier family 2 member 10 [Source:HGNC Symbol;Acc:HGNC:13444]
ENSG00000136014	300.44	-0.881843	0.101646	-8.67561	4.11353e-18	4.06679e-17	0.0069477	422	238	ENSG00000136014	USP44	ubiquitin specific peptidase 44 [Source:HGNC Symbol;Acc:HGNC:20064]
ENSG00000101003	2210.59	0.322474	0.0372005	8.66852	4.37761e-18	4.32479e-17	0.000830831	1851.33	2404.17	ENSG00000101003	GINS1	GINS complex subunit 1 [Source:HGNC Symbol;Acc:HGNC:28980]
ENSG00000080839	4055.05	0.406786	0.0469362	8.66678	4.44529e-18	4.38854e-17	0.00183764	3260	4484.17	ENSG00000080839	RBL1	RB transcriptional corepressor like 1 [Source:HGNC Symbol;Acc:HGNC:9893]
ENSG00000111540	3895.99	-0.434792	0.0502027	-8.66074	4.68722e-18	4.62411e-17	0.00218275	4612.33	3539	ENSG00000111540	RAB5B	RAB5B, member RAS oncogene family [Source:HGNC Symbol;Acc:HGNC:9784]
ENSG00000086619	589.17	-0.622541	0.0718958	-8.65894	4.76176e-18	4.69431e-17	0.00342126	751	507	ENSG00000086619	ERO1B	endoplasmic reticulum oxidoreductase 1 beta [Source:HGNC Symbol;Acc:HGNC:14355]
ENSG00000157014	1338.35	0.520178	0.0600837	8.65755	4.82018e-18	4.74855e-17	0.00259061	1014.33	1510.17	ENSG00000157014	TATDN2	TatD DNase domain containing 2 [Source:HGNC Symbol;Acc:HGNC:28988]
ENSG00000008294	9762.15	-0.193852	0.0224013	-8.65363	4.98856e-18	4.91094e-17	0.000382877	10417.7	9457.5	ENSG00000008294	SPAG9	sperm associated antigen 9 [Source:HGNC Symbol;Acc:HGNC:14524]
ENSG00000135047	4292.9	-0.359036	0.041493	-8.65292	5.01972e-18	4.93813e-17	0.00143497	4924.33	3981	ENSG00000135047	CTSL	cathepsin L [Source:HGNC Symbol;Acc:HGNC:2537]
ENSG00000091651	1390.26	0.801543	0.0926873	8.64782	5.24928e-18	5.16031e-17	0.00731813	907.667	1643.83	ENSG00000091651	ORC6	origin recognition complex subunit 6 [Source:HGNC Symbol;Acc:HGNC:17151]
ENSG00000100395	840.854	0.508181	0.0587817	8.64522	5.37006e-18	5.27531e-17	0.00192846	642	947.333	ENSG00000100395	L3MBTL2	L3MBTL2, polycomb repressive complex 1 subunit [Source:HGNC Symbol;Acc:HGNC:18594]
ENSG00000154237	1921.42	-0.476529	0.0551538	-8.64	5.6212e-18	5.51813e-17	0.00244117	2313	1727.17	ENSG00000154237	LRRK1	leucine rich repeat kinase 1 [Source:HGNC Symbol;Acc:HGNC:18608]
ENSG00000168924	4290.65	0.472346	0.054678	8.63867	5.68692e-18	5.57871e-17	0.00260319	3334	4802.33	ENSG00000168924	LETM1	leucine zipper and EF-hand containing transmembrane protein 1 [Source:HGNC Symbol;Acc:HGNC:6556]
ENSG00000091436	7613.51	-0.542419	0.0627907	-8.63852	5.69468e-18	5.58239e-17	0.00366788	9397.67	6710.83	ENSG00000091436	MAP3K20	mitogen-activated protein kinase kinase kinase 20 [Source:HGNC Symbol;Acc:HGNC:17797]
ENSG00000130717	760.238	0.586824	0.0679427	8.63704	5.76871e-18	5.65098e-17	0.00285347	556.667	867.667	ENSG00000130717	UCK1	uridine-cytidine kinase 1 [Source:HGNC Symbol;Acc:HGNC:14859]
ENSG00000128604	224.47	-1.02836	0.119073	-8.63639	5.80166e-18	5.67927e-17	0.00964744	332.333	169.5	ENSG00000128604	IRF5	interferon regulatory factor 5 [Source:HGNC Symbol;Acc:HGNC:6120]
ENSG00000186594	400.937	0.755	0.0874263	8.63585	5.82922e-18	5.70223e-17	0.00415451	268.667	471	ENSG00000186594	MIR22HG	MIR22 host gene [Source:HGNC Symbol;Acc:HGNC:28219]
ENSG00000172037	13262.4	-0.29288	0.0339205	-8.63431	5.90847e-18	5.7757e-17	0.00103382	14774.3	12524.5	ENSG00000172037	LAMB2	laminin subunit beta 2 [Source:HGNC Symbol;Acc:HGNC:6487]
ENSG00000100401	9718.88	0.326834	0.0378549	8.63386	5.93149e-18	5.79413e-17	0.00126331	8126.67	10581.5	ENSG00000100401	RANGAP1	Ran GTPase activating protein 1 [Source:HGNC Symbol;Acc:HGNC:9854]
ENSG00000131669	647.622	-0.555678	0.0643739	-8.63204	6.02683e-18	5.88313e-17	0.00256615	805.333	568.167	ENSG00000131669	NINJ1	ninjurin 1 [Source:HGNC Symbol;Acc:HGNC:7824]
ENSG00000164307	3902.3	-0.440846	0.0510822	-8.63012	6.12895e-18	5.97863e-17	0.00226894	4633	3539.33	ENSG00000164307	ERAP1	endoplasmic reticulum aminopeptidase 1 [Source:HGNC Symbol;Acc:HGNC:18173]
ENSG00000143621	9463.77	0.300452	0.0348164	8.62961	6.15602e-18	6.00083e-17	0.00104899	8021.33	10245.2	ENSG00000143621	ILF2	interleukin enhancer binding factor 2 [Source:HGNC Symbol;Acc:HGNC:6037]
ENSG00000135622	1186.07	-0.451778	0.052354	-8.62928	6.17373e-18	6.01388e-17	0.00185051	1412.67	1072	ENSG00000135622	SEMA4F	ssemaphorin 4F [Source:HGNC Symbol;Acc:HGNC:10734]
ENSG00000136237	264.306	-1.05844	0.122679	-8.62779	6.25468e-18	6.08847e-17	0.0110833	395.667	197.333	ENSG00000136237	RAPGEF5	Rap guanine nucleotide exchange factor 5 [Source:HGNC Symbol;Acc:HGNC:16862]
ENSG00000111641	3417.37	0.722772	0.08379	8.62599	6.35392e-18	6.18076e-17	0.00637643	2329.33	3994.83	ENSG00000111641	NOP2	NOP2 nucleolar protein [Source:HGNC Symbol;Acc:HGNC:7867]
ENSG00000160049	3562.06	0.307241	0.0356437	8.6198	6.70726e-18	6.5199e-17	0.000912587	3006	3865.17	ENSG00000160049	DFFA	DNA fragmentation factor subunit alpha [Source:HGNC Symbol;Acc:HGNC:2772]
ENSG00000197415	763.782	-0.538462	0.0625031	-8.61495	6.99691e-18	6.79672e-17	0.00255125	942.667	674.333	ENSG00000197415	VEPH1	ventricular zone expressed PH domain containing 1 [Source:HGNC Symbol;Acc:HGNC:25735]
ENSG00000177963	8005.59	0.486976	0.0565373	8.61336	7.09482e-18	6.88702e-17	0.00292629	6178.67	8984.17	ENSG00000177963	RIC8A	RIC8 guanine nucleotide exchange factor A [Source:HGNC Symbol;Acc:HGNC:29550]
ENSG00000107262	1575.96	0.591325	0.0686537	8.61315	7.10796e-18	6.89497e-17	0.00376471	1153.33	1802.67	ENSG00000107262	BAG1	BCL2 associated athanogene 1 [Source:HGNC Symbol;Acc:HGNC:937]
ENSG00000049860	8104.66	-0.339379	0.039416	-8.61017	7.29492e-18	7.07139e-17	0.00137631	9218	7561.67	ENSG00000049860	HEXB	hexosaminidase subunit beta [Source:HGNC Symbol;Acc:HGNC:4879]
ENSG00000149483	1523.62	0.565669	0.065726	8.60647	7.53417e-18	7.29823e-17	0.0033674	1127.67	1734.67	ENSG00000149483	TMEM138	transmembrane protein 138 [Source:HGNC Symbol;Acc:HGNC:26944]
ENSG00000089127	469.582	-0.727514	0.0845387	-8.60569	7.58567e-18	7.34301e-17	0.00494505	623.333	391.167	ENSG00000089127	OAS1	2'-5'-oligoadenylate synthetase 1 [Source:HGNC Symbol;Acc:HGNC:8086]
ENSG00000104228	768.016	0.486535	0.0565389	8.60532	7.61031e-18	7.36175e-17	0.00155893	592.333	862	ENSG00000104228	TRIM35	tripartite motif containing 35 [Source:HGNC Symbol;Acc:HGNC:16285]
ENSG00000166226	10967.3	0.307716	0.0357862	8.59873	8.06028e-18	7.7916e-17	0.00113044	9258.33	11894.3	ENSG00000166226	CCT2	chaperonin containing TCP1 subunit 2 [Source:HGNC Symbol;Acc:HGNC:1615]
ENSG00000143772	865.246	-0.535599	0.0622909	-8.59835	8.08724e-18	7.81224e-17	0.00266627	1066.33	764.167	ENSG00000143772	ITPKB	inositol-trisphosphate 3-kinase B [Source:HGNC Symbol;Acc:HGNC:6179]
ENSG00000149743	394.832	-0.811058	0.0943537	-8.59593	8.25927e-18	7.97289e-17	0.00628058	540.667	320.667	ENSG00000149743	TRPT1	tRNA phosphotransferase 1 [Source:HGNC Symbol;Acc:HGNC:20316]
ENSG00000138768	3891.74	-0.395515	0.0460169	-8.59499	8.32725e-18	8.03294e-17	0.00179412	4534.67	3573.5	ENSG00000138768	USO1	USO1 vesicle transport factor [Source:HGNC Symbol;Acc:HGNC:30904]
ENSG00000109689	876.742	0.516546	0.0601146	8.5927	8.49498e-18	8.18906e-17	0.00213373	666.333	989	ENSG00000109689	STIM2	stromal interaction molecule 2 [Source:HGNC Symbol;Acc:HGNC:19205]
ENSG00000143727	3227.48	0.386089	0.0449335	8.59246	8.51248e-18	8.20026e-17	0.0015915	2618.67	3552.33	ENSG00000143727	ACP1	acid phosphatase 1 [Source:HGNC Symbol;Acc:HGNC:122]
ENSG00000185112	1028.45	-0.528535	0.0615212	-8.59112	8.61275e-18	8.29112e-17	0.00274246	1265	909.667	ENSG00000185112	FAM43A	family with sequence similarity 43 member A [Source:HGNC Symbol;Acc:HGNC:26888]
ENSG00000204642	88.7068	-1.3434	0.156403	-8.58938	8.74364e-18	8.4113e-17	0.0133281	145.667	59.6667	ENSG00000204642	HLA-F	major histocompatibility complex, class I, F [Source:HGNC Symbol;Acc:HGNC:4963]
ENSG00000184867	718.512	-1.17695	0.137092	-8.58514	9.0727e-18	8.72182e-17	0.0168132	1116.67	514.333	ENSG00000184867	ARMCX2	armadillo repeat containing X-linked 2 [Source:HGNC Symbol;Acc:HGNC:16869]
ENSG00000129680	5136.61	0.510422	0.0594798	8.58143	9.36994e-18	9.00135e-17	0.00317144	3911	5791.83	ENSG00000129680	MAP7D3	MAP7 domain containing 3 [Source:HGNC Symbol;Acc:HGNC:25742]
ENSG00000099308	1101.26	-0.429431	0.0500521	-8.57968	9.51413e-18	9.13356e-17	0.00156122	1299.67	1002.33	ENSG00000099308	MAST3	microtubule associated serine/threonine kinase 3 [Source:HGNC Symbol;Acc:HGNC:19036]
ENSG00000198917	964.684	0.472175	0.055094	8.57035	1.03172e-17	9.89771e-17	0.00171785	749.667	1079.33	ENSG00000198917	SPOUT1	SPOUT domain containing methyltransferase 1 [Source:HGNC Symbol;Acc:HGNC:26933]
ENSG00000172985	955.759	-0.449259	0.0524235	-8.5698	1.03666e-17	9.93822e-17	0.00166866	1137.67	865	ENSG00000172985	SH3RF3	SH3 domain containing ring finger 3 [Source:HGNC Symbol;Acc:HGNC:24699]
ENSG00000143674	932.889	-0.492125	0.0574301	-8.5691	1.04298e-17	9.99193e-17	0.00217879	1129.33	834	ENSG00000143674	MAP3K21	mitogen-activated protein kinase kinase kinase 21 [Source:HGNC Symbol;Acc:HGNC:29798]
ENSG00000137103	188.759	-1.28968	0.150506	-8.56893	1.0445e-17	9.99888e-17	0.0169956	304.667	129.167	ENSG00000137103	TMEM8B	transmembrane protein 8B [Source:HGNC Symbol;Acc:HGNC:21427]
ENSG00000118200	3762.15	0.394468	0.0460351	8.56886	1.04514e-17	9.99888e-17	0.00173657	3042.67	4150.5	ENSG00000118200	CAMSAP2	calmodulin regulated spectrin associated protein family member 2 [Source:HGNC Symbol;Acc:HGNC:29188]
ENSG00000260916	378.8	-0.733253	0.085577	-8.56835	1.0498e-17	1.00365e-16	0.00465522	504	315	ENSG00000260916	CCPG1	cell cycle progression 1 [Source:HGNC Symbol;Acc:HGNC:24227]
ENSG00000170113	2222.93	-0.380742	0.0444502	-8.56559	1.07527e-17	1.0273e-16	0.00147632	2571.67	2049	ENSG00000170113	NIPA1	NIPA magnesium transporter 1 [Source:HGNC Symbol;Acc:HGNC:17043]
ENSG00000206195	327.914	0.978643	0.114267	8.56451	1.08539e-17	1.03626e-16	0.00828136	194.667	398	ENSG00000206195	DUXAP8	double homeobox A pseudogene 8 [Source:HGNC Symbol;Acc:HGNC:32187]
ENSG00000166710	10553.9	-0.369352	0.043133	-8.56309	1.09878e-17	1.04832e-16	0.00169863	12165.3	9762.17	ENSG00000166710	B2M	beta-2-microglobulin [Source:HGNC Symbol;Acc:HGNC:914]
ENSG00000189195	161.199	-1.32168	0.154383	-8.56108	1.11814e-17	1.06606e-16	0.0173039	262.667	109	ENSG00000189195	BTBD8	BTB domain containing 8 [Source:HGNC Symbol;Acc:HGNC:21019]
ENSG00000147536	1504.52	0.936054	0.109345	8.56052	1.12362e-17	1.07055e-16	0.0105754	915	1814.33	ENSG00000147536	GINS4	GINS complex subunit 4 [Source:HGNC Symbol;Acc:HGNC:28226]
ENSG00000107959	4764.4	0.492753	0.0575754	8.5584	1.14444e-17	1.08965e-16	0.00294086	3666	5348.33	ENSG00000107959	PITRM1	pitrilysin metallopeptidase 1 [Source:HGNC Symbol;Acc:HGNC:17663]
ENSG00000101298	707.215	-0.65038	0.0759978	-8.55788	1.14965e-17	1.09385e-16	0.00426557	911.667	603.667	ENSG00000101298	SNPH	syntaphilin [Source:HGNC Symbol;Acc:HGNC:15931]
ENSG00000151806	2325.07	0.447153	0.0522518	8.55766	1.15179e-17	1.09515e-16	0.00213009	1829.33	2589.67	ENSG00000151806	GUF1	GUF1 homolog, GTPase [Source:HGNC Symbol;Acc:HGNC:25799]
ENSG00000152284	276.751	-0.803117	0.0938598	-8.55656	1.16284e-17	1.10489e-16	0.00521969	378	225.167	ENSG00000152284	TCF7L1	transcription factor 7 like 1 [Source:HGNC Symbol;Acc:HGNC:11640]
ENSG00000173376	111.42	-1.441	0.16842	-8.55602	1.16835e-17	1.10938e-16	0.0190781	188.333	72	ENSG00000173376	NDNF	neuron derived neurotrophic factor [Source:HGNC Symbol;Acc:HGNC:26256]
ENSG00000143799	10090.6	0.266007	0.0311235	8.5468	1.2655e-17	1.2008e-16	0.000823294	8694.33	10847	ENSG00000143799	PARP1	poly(ADP-ribose) polymerase 1 [Source:HGNC Symbol;Acc:HGNC:270]
ENSG00000119650	335.842	-0.701846	0.0821414	-8.54437	1.29243e-17	1.22515e-16	0.00379159	442	282.167	ENSG00000119650	IFT43	intraflagellar transport 43 [Source:HGNC Symbol;Acc:HGNC:29669]
ENSG00000183762	646.826	-0.702362	0.0822022	-8.54432	1.29292e-17	1.22515e-16	0.00509482	851	543	ENSG00000183762	KREMEN1	kringle containing transmembrane protein 1 [Source:HGNC Symbol;Acc:HGNC:17550]
ENSG00000176845	247.322	-1.03788	0.121485	-8.54326	1.30489e-17	1.23565e-16	0.0105718	367.667	186	ENSG00000176845	METRNL	meteorin like, glial cell differentiation regulator [Source:HGNC Symbol;Acc:HGNC:27584]
ENSG00000149573	209.154	-1.49267	0.174749	-8.54179	1.32161e-17	1.25063e-16	0.0249615	358.333	132.333	ENSG00000149573	MPZL2	myelin protein zero like 2 [Source:HGNC Symbol;Acc:HGNC:3496]
ENSG00000165757	270.806	-0.907864	0.106302	-8.54045	1.33695e-17	1.26345e-16	0.00755578	384.667	212.833	ENSG00000165757	JCAD	junctional cadherin 5 associated [Source:HGNC Symbol;Acc:HGNC:29283]
ENSG00000175756	2474.93	0.39402	0.0461357	8.54045	1.33697e-17	1.26345e-16	0.00158965	2002.33	2729.33	ENSG00000175756	AURKAIP1	aurora kinase A interacting protein 1 [Source:HGNC Symbol;Acc:HGNC:24114]
ENSG00000108344	8264.48	0.296126	0.0346756	8.53987	1.34372e-17	1.26897e-16	0.00102296	7019.33	8940.33	ENSG00000108344	PSMD3	proteasome 26S subunit, non-ATPase 3 [Source:HGNC Symbol;Acc:HGNC:9560]
ENSG00000172845	4684.41	0.33756	0.0395315	8.53901	1.35372e-17	1.27755e-16	0.00126507	3896.67	5109	ENSG00000172845	SP3	Sp3 transcription factor [Source:HGNC Symbol;Acc:HGNC:11208]
ENSG00000135698	1168.26	0.420562	0.0492692	8.53602	1.38924e-17	1.31018e-16	0.00135929	932	1295.33	ENSG00000135698	MPHOSPH6	M-phase phosphoprotein 6 [Source:HGNC Symbol;Acc:HGNC:7214]
ENSG00000068912	2967.61	-0.320012	0.0374986	-8.53397	1.41414e-17	1.33275e-16	0.00103181	3346.33	2781.33	ENSG00000068912	ERLEC1	endoplasmic reticulum lectin 1 [Source:HGNC Symbol;Acc:HGNC:25222]
ENSG00000081177	1306.93	-0.384096	0.0450235	-8.53101	1.45072e-17	1.36631e-16	0.00123024	1514	1204.5	ENSG00000081177	EXD2	exonuclease 3'-5' domain containing 2 [Source:HGNC Symbol;Acc:HGNC:20217]
ENSG00000204673	2634.48	0.464942	0.0545078	8.52983	1.46558e-17	1.37935e-16	0.00241694	2056.67	2944.33	ENSG00000204673	AKT1S1	AKT1 substrate 1 [Source:HGNC Symbol;Acc:HGNC:28426]
ENSG00000185989	4150.35	-0.270852	0.0317538	-8.52976	1.46655e-17	1.37935e-16	0.000738612	4582.33	3942.17	ENSG00000185989	RASA3	RAS p21 protein activator 3 [Source:HGNC Symbol;Acc:HGNC:20331]
ENSG00000178896	615.653	0.615593	0.0721711	8.52963	1.46813e-17	1.37991e-16	0.00303127	444	706.333	ENSG00000178896	EXOSC4	exosome component 4 [Source:HGNC Symbol;Acc:HGNC:18189]
ENSG00000171346	152.527	-1.38187	0.162013	-8.5294	1.47109e-17	1.38134e-16	0.0192799	253	101	ENSG00000171346	KRT15	keratin 15 [Source:HGNC Symbol;Acc:HGNC:6421]
ENSG00000101290	6058.63	-0.327266	0.0383694	-8.52936	1.47164e-17	1.38134e-16	0.0012584	6853.33	5669	ENSG00000101290	CDS2	CDP-diacylglycerol synthase 2 [Source:HGNC Symbol;Acc:HGNC:1801]
ENSG00000157916	3128.13	0.34034	0.0399221	8.52511	1.52665e-17	1.43201e-16	0.00117693	2597.33	3414.67	ENSG00000157916	RER1	retention in endoplasmic reticulum sorting receptor 1 [Source:HGNC Symbol;Acc:HGNC:30309]
ENSG00000063180	55.2901	-1.57537	0.184835	-8.52313	1.55294e-17	1.45569e-16	0.0160948	97	33.8333	ENSG00000063180	CA11	carbonic anhydrase 11 [Source:HGNC Symbol;Acc:HGNC:1370]
ENSG00000169972	482.78	0.600837	0.0704985	8.52269	1.55885e-17	1.46024e-16	0.0022733	351.333	553	ENSG00000169972	PUSL1	pseudouridine synthase like 1 [Source:HGNC Symbol;Acc:HGNC:26914]
ENSG00000160685	634.98	-0.533973	0.0626808	-8.51891	1.61055e-17	1.50766e-16	0.00232815	782.667	561.333	ENSG00000160685	ZBTB7B	zinc finger and BTB domain containing 7B [Source:HGNC Symbol;Acc:HGNC:18668]
ENSG00000134057	12296.7	0.292495	0.0343506	8.515	1.66585e-17	1.55837e-16	0.00104492	10465.7	13292.5	ENSG00000134057	CCNB1	cyclin B1 [Source:HGNC Symbol;Acc:HGNC:1579]
ENSG00000158467	734.531	-0.644841	0.0757816	-8.50921	1.75118e-17	1.63711e-16	0.00428098	944.667	627.5	ENSG00000158467	AHCYL2	adenosylhomocysteinase like 2 [Source:HGNC Symbol;Acc:HGNC:22204]
ENSG00000171490	7827.11	0.560302	0.0658601	8.50745	1.77805e-17	1.66111e-16	0.00401571	5813.67	8902	ENSG00000171490	RSL1D1	ribosomal L1 domain containing 1 [Source:HGNC Symbol;Acc:HGNC:24534]
ENSG00000118257	784.485	-1.10622	0.13006	-8.50543	1.80929e-17	1.68916e-16	0.015115	1193	575.5	ENSG00000118257	NRP2	neuropilin 2 [Source:HGNC Symbol;Acc:HGNC:8005]
ENSG00000276180	359.675	1.00436	0.118117	8.50311	1.84584e-17	1.72212e-16	0.00947438	210.333	437.5	ENSG00000276180	HIST1H4I	histone cluster 1 H4 family member i [Source:HGNC Symbol;Acc:HGNC:4793]
ENSG00000148180	154.942	-1.19737	0.140823	-8.50268	1.8527e-17	1.72737e-16	0.0132744	243.667	109.833	ENSG00000148180	GSN	gelsolin [Source:HGNC Symbol;Acc:HGNC:4620]
ENSG00000130052	408.666	-0.791279	0.0931175	-8.49764	1.93492e-17	1.80281e-16	0.00613224	556	333.667	ENSG00000130052	STARD8	StAR related lipid transfer domain containing 8 [Source:HGNC Symbol;Acc:HGNC:19161]
ENSG00000139350	1776.96	-0.512572	0.0603217	-8.49731	1.94041e-17	1.80673e-16	0.00297763	2168	1577.83	ENSG00000139350	NEDD1	neural precursor cell expressed, developmentally down-regulated 1 [Source:HGNC Symbol;Acc:HGNC:7723]
ENSG00000105409	890.781	0.578709	0.0681469	8.49208	2.02968e-17	1.88858e-16	0.00311604	655	1016	ENSG00000105409	ATP1A3	ATPase Na+/K+ transporting subunit alpha 3 [Source:HGNC Symbol;Acc:HGNC:801]
ENSG00000144381	18857.9	0.239211	0.0281779	8.48932	2.07858e-17	1.93279e-16	0.000705871	16463.3	20168.7	ENSG00000144381	HSPD1	heat shock protein family D (Hsp60) member 1 [Source:HGNC Symbol;Acc:HGNC:5261]
ENSG00000122218	8374.69	-0.249116	0.0293504	-8.48766	2.10838e-17	1.95919e-16	0.000713185	9160.33	7996.5	ENSG00000122218	COPA	coatomer protein complex subunit alpha [Source:HGNC Symbol;Acc:HGNC:2230]
ENSG00000089159	11806.6	0.338681	0.0399031	8.48758	2.10984e-17	1.95924e-16	0.00143611	9819.33	12879.5	ENSG00000089159	PXN	paxillin [Source:HGNC Symbol;Acc:HGNC:9718]
ENSG00000136999	360.014	1.5801	0.186203	8.48591	2.14037e-17	1.98627e-16	0.028195	151.333	469.167	ENSG00000136999	NOV	nephroblastoma overexpressed [Source:HGNC Symbol;Acc:HGNC:7885]
ENSG00000181163	66654.1	0.389836	0.0459475	8.48438	2.16874e-17	2.01125e-16	0.00201174	54003.7	73469.7	ENSG00000181163	NPM1	nucleophosmin 1 [Source:HGNC Symbol;Acc:HGNC:7910]
ENSG00000070010	1946.86	0.333166	0.0392687	8.48428	2.17064e-17	2.01167e-16	0.000913464	1623	2122.5	ENSG00000070010	UFD1	ubiquitin recognition factor in ER associated degradation 1 [Source:HGNC Symbol;Acc:HGNC:12520]
ENSG00000140199	1825.86	-0.373809	0.0440714	-8.4819	2.21546e-17	2.05184e-16	0.00135181	2105.67	1687.5	ENSG00000140199	SLC12A6	solute carrier family 12 member 6 [Source:HGNC Symbol;Acc:HGNC:10914]
ENSG00000130348	746.935	0.528318	0.062297	8.48064	2.23964e-17	2.07286e-16	0.00215145	564	844.333	ENSG00000130348	QRSL1	QRSL1, glutaminyl-tRNA amidotransferase subunit A [Source:HGNC Symbol;Acc:HGNC:21020]
ENSG00000171608	1376.58	-0.66609	0.0785757	-8.47705	2.30966e-17	2.13624e-16	0.00527376	1784.67	1169.17	ENSG00000171608	PIK3CD	phosphatidylinositol-4,5-bisphosphate 3-kinase catalytic subunit delta [Source:HGNC Symbol;Acc:HGNC:8977]
ENSG00000056972	610.092	-0.540458	0.063805	-8.47047	2.44408e-17	2.25907e-16	0.00240589	753	537.333	ENSG00000056972	TRAF3IP2	TRAF3 interacting protein 2 [Source:HGNC Symbol;Acc:HGNC:1343]
ENSG00000181513	326.768	-0.831648	0.0981871	-8.47004	2.45314e-17	2.26594e-16	0.00651927	451	263.667	ENSG00000181513	ACBD4	acyl-CoA binding domain containing 4 [Source:HGNC Symbol;Acc:HGNC:23337]
ENSG00000139793	2981.39	-0.405205	0.0478499	-8.46825	2.49104e-17	2.29942e-16	0.0018864	3483.67	2730.5	ENSG00000139793	MBNL2	muscleblind like splicing regulator 2 [Source:HGNC Symbol;Acc:HGNC:16746]
ENSG00000205356	1054.46	-0.592135	0.0699296	-8.46759	2.50513e-17	2.3109e-16	0.00383269	1328.33	916.167	ENSG00000205356	TECPR1	tectonin beta-propeller repeat containing 1 [Source:HGNC Symbol;Acc:HGNC:22214]
ENSG00000185630	342.088	-1.12704	0.133127	-8.46589	2.54214e-17	2.34349e-16	0.0144165	524.333	249	ENSG00000185630	PBX1	PBX homeobox 1 [Source:HGNC Symbol;Acc:HGNC:8632]
ENSG00000130363	480.616	-0.677742	0.080057	-8.46574	2.5453e-17	2.34485e-16	0.00427382	627.333	406.833	ENSG00000130363	RSPH3	radial spoke head 3 homolog [Source:HGNC Symbol;Acc:HGNC:21054]
ENSG00000087088	1850.09	0.331857	0.0392167	8.46214	2.6251e-17	2.41676e-16	0.000880074	1543	2016.67	ENSG00000087088	BAX	BCL2 associated X, apoptosis regulator [Source:HGNC Symbol;Acc:HGNC:959]
ENSG00000129460	1448.21	0.4089	0.0483243	8.46157	2.63797e-17	2.427e-16	0.00146148	1161.33	1600.83	ENSG00000129460	NGDN	neuroguidin [Source:HGNC Symbol;Acc:HGNC:20271]
ENSG00000154122	2853.9	-0.472394	0.055861	-8.4566	2.75291e-17	2.53108e-16	0.00267384	3435.67	2567.33	ENSG00000154122	ANKH	ANKH inorganic pyrophosphate transport regulator [Source:HGNC Symbol;Acc:HGNC:15492]
ENSG00000128626	918.609	0.547621	0.0647781	8.45379	2.82003e-17	2.59108e-16	0.00274081	687	1042.5	ENSG00000128626	MRPS12	mitochondrial ribosomal protein S12 [Source:HGNC Symbol;Acc:HGNC:10380]
ENSG00000059122	1289.65	-0.523162	0.0619151	-8.44966	2.92163e-17	2.68265e-16	0.00296976	1580.33	1142.5	ENSG00000059122	FLYWCH1	FLYWCH-type zinc finger 1 [Source:HGNC Symbol;Acc:HGNC:25404]
ENSG00000107789	1334.51	-0.443868	0.052535	-8.44898	2.9386e-17	2.69647e-16	0.00195515	1584.67	1209.17	ENSG00000107789	MINPP1	multiple inositol-polyphosphate phosphatase 1 [Source:HGNC Symbol;Acc:HGNC:7102]
ENSG00000132507	30746.2	0.461077	0.0545741	8.44863	2.94735e-17	2.70271e-16	0.00282441	24043.3	34348	ENSG00000132507	EIF5A	eukaryotic translation initiation factor 5A [Source:HGNC Symbol;Acc:HGNC:3300]
ENSG00000105605	453.158	-1.39903	0.165624	-8.44702	2.98836e-17	2.73851e-16	0.0243555	756.667	298.167	ENSG00000105605	CACNG7	calcium voltage-gated channel auxiliary subunit gamma 7 [Source:HGNC Symbol;Acc:HGNC:13626]
ENSG00000139354	2581.47	0.342095	0.0405065	8.44544	3.02896e-17	2.77389e-16	0.00114681	2142	2819.17	ENSG00000139354	GAS2L3	growth arrest specific 2 like 3 [Source:HGNC Symbol;Acc:HGNC:27475]
ENSG00000136213	1297.45	0.680567	0.0805945	8.44434	3.05781e-17	2.79847e-16	0.00528262	905.667	1505.17	ENSG00000136213	CHST12	carbohydrate sulfotransferase 12 [Source:HGNC Symbol;Acc:HGNC:17423]
ENSG00000185862	1668.39	0.756219	0.0895584	8.44386	3.07014e-17	2.80791e-16	0.0069399	1117.67	1958.67	ENSG00000185862	EVI2B	ecotropic viral integration site 2B [Source:HGNC Symbol;Acc:HGNC:3500]
ENSG00000130881	479.374	-0.745024	0.0882542	-8.44179	3.12503e-17	2.85623e-16	0.00560421	642	397.5	ENSG00000130881	LRP3	LDL receptor related protein 3 [Source:HGNC Symbol;Acc:HGNC:6695]
ENSG00000082258	1331.27	0.391944	0.0464671	8.43487	3.31581e-17	3.02862e-16	0.00122851	1078	1468.17	ENSG00000082258	CCNT2	cyclin T2 [Source:HGNC Symbol;Acc:HGNC:1600]
ENSG00000037897	385.872	0.797655	0.0945837	8.43332	3.35982e-17	3.0668e-16	0.00522728	253	456.333	ENSG00000037897	METTL1	methyltransferase like 1 [Source:HGNC Symbol;Acc:HGNC:7030]
ENSG00000042286	1743.72	0.41947	0.0497742	8.42746	3.53251e-17	3.22231e-16	0.00172859	1392	1931.33	ENSG00000042286	AIFM2	apoptosis inducing factor, mitochondria associated 2 [Source:HGNC Symbol;Acc:HGNC:21411]
ENSG00000069399	378.952	-1.41584	0.16802	-8.4266	3.55862e-17	3.24401e-16	0.0247277	637	247.5	ENSG00000069399	BCL3	B cell CLL/lymphoma 3 [Source:HGNC Symbol;Acc:HGNC:998]
ENSG00000076944	404.841	-0.960431	0.114009	-8.4242	3.63221e-17	3.30892e-16	0.0102831	585.667	312.833	ENSG00000076944	STXBP2	syntaxin binding protein 2 [Source:HGNC Symbol;Acc:HGNC:11445]
ENSG00000167695	1374.71	0.479086	0.0568884	8.42151	3.71654e-17	3.38353e-16	0.00226656	1065.67	1540	ENSG00000167695	FAM57A	family with sequence similarity 57 member A [Source:HGNC Symbol;Acc:HGNC:29646]
ENSG00000115350	1165.01	0.426906	0.0507043	8.41951	3.78049e-17	3.4395e-16	0.00149231	926.333	1292.67	ENSG00000115350	POLE4	DNA polymerase epsilon 4, accessory subunit [Source:HGNC Symbol;Acc:HGNC:18755]
ENSG00000105323	16927	0.271049	0.0321958	8.41878	3.80412e-17	3.45875e-16	0.00093186	14551.7	18225.8	ENSG00000105323	HNRNPUL1	heterogeneous nuclear ribonucleoprotein U like 1 [Source:HGNC Symbol;Acc:HGNC:17011]
ENSG00000111962	925.663	-0.439986	0.0522689	-8.41774	3.83826e-17	3.4875e-16	0.0016203	1098	840	ENSG00000111962	UST	uronyl 2-sulfotransferase [Source:HGNC Symbol;Acc:HGNC:17223]
ENSG00000177700	4173.12	0.403842	0.0479888	8.41535	3.91711e-17	3.55683e-16	0.0019418	3361.67	4611.67	ENSG00000177700	POLR2L	RNA polymerase II subunit L [Source:HGNC Symbol;Acc:HGNC:9199]
ENSG00000159086	1506.25	0.418748	0.0497859	8.41097	4.06639e-17	3.68997e-16	0.00162717	1202.33	1669.17	ENSG00000159086	PAXBP1	PAX3 and PAX7 binding protein 1 [Source:HGNC Symbol;Acc:HGNC:13579]
ENSG00000072682	2166.24	-0.608399	0.0723417	-8.41008	4.09733e-17	3.71562e-16	0.00460767	2751	1870	ENSG00000072682	P4HA2	prolyl 4-hydroxylase subunit alpha 2 [Source:HGNC Symbol;Acc:HGNC:8547]
ENSG00000197136	4320.53	0.451953	0.0537444	8.4093	4.12455e-17	3.73788e-16	0.00250959	3394.33	4820.33	ENSG00000197136	PCNX3	pecanex 3 [Source:HGNC Symbol;Acc:HGNC:18760]
ENSG00000116863	1177.04	0.444307	0.0528556	8.40606	4.24006e-17	3.84006e-16	0.00171106	928	1311.17	ENSG00000116863	ADPRHL2	ADP-ribosylhydrolase like 2 [Source:HGNC Symbol;Acc:HGNC:21304]
ENSG00000196352	4851.25	-0.631021	0.0750952	-8.40295	4.35413e-17	3.9408e-16	0.00523123	6209.33	4165.33	ENSG00000196352	CD55	CD55 molecule (Cromer blood group) [Source:HGNC Symbol;Acc:HGNC:2665]
ENSG00000173141	1397.88	0.415179	0.0494174	8.40146	4.40949e-17	3.98831e-16	0.00153462	1119	1548.33	ENSG00000173141	MRPL57	mitochondrial ribosomal protein L57 [Source:HGNC Symbol;Acc:HGNC:14514]
ENSG00000166130	4439.34	0.265239	0.0315768	8.3998	4.47241e-17	4.0426e-16	0.000713859	3827	4775.33	ENSG00000166130	IKBIP	IKBKB interacting protein [Source:HGNC Symbol;Acc:HGNC:26430]
ENSG00000182359	144.142	-1.25479	0.149414	-8.39804	4.53996e-17	4.10099e-16	0.0152197	230	100.167	ENSG00000182359	KBTBD3	kelch repeat and BTB domain containing 3 [Source:HGNC Symbol;Acc:HGNC:22934]
ENSG00000160801	167.541	-1.26267	0.150383	-8.39633	4.60634e-17	4.15825e-16	0.0163645	267.333	116	ENSG00000160801	PTH1R	parathyroid hormone 1 receptor [Source:HGNC Symbol;Acc:HGNC:9608]
ENSG00000197555	6157.24	-0.451259	0.0537738	-8.39181	4.78716e-17	4.31868e-16	0.00262767	7342.67	5573.83	ENSG00000197555	SIPA1L1	signal induced proliferation associated 1 like 1 [Source:HGNC Symbol;Acc:HGNC:20284]
ENSG00000081320	2460.39	-0.333165	0.0397133	-8.38925	4.89233e-17	4.4107e-16	0.0011312	2791.67	2299.17	ENSG00000081320	STK17B	serine/threonine kinase 17b [Source:HGNC Symbol;Acc:HGNC:11396]
ENSG00000141580	5859.9	0.278666	0.0332302	8.38592	5.03305e-17	4.53463e-16	0.00087528	5020.33	6318.5	ENSG00000141580	WDR45B	WD repeat domain 45B [Source:HGNC Symbol;Acc:HGNC:25072]
ENSG00000167460	32833.8	-0.221563	0.0264304	-8.3829	5.16392e-17	4.64953e-16	0.000641877	35484.7	31586.7	ENSG00000167460	TPM4	tropomyosin 4 [Source:HGNC Symbol;Acc:HGNC:12013]
ENSG00000170743	151.404	-1.37429	0.163952	-8.38224	5.1928e-17	4.67251e-16	0.0198453	250	100.5	ENSG00000170743	SYT9	synaptotagmin 9 [Source:HGNC Symbol;Acc:HGNC:19265]
ENSG00000169715	1671.34	0.63218	0.0754803	8.37542	5.50269e-17	4.94815e-16	0.00474323	1198.67	1925.33	ENSG00000169715	MT1E	metallothionein 1E [Source:HGNC Symbol;Acc:HGNC:7397]
ENSG00000144659	1564.15	0.426198	0.0509	8.37324	5.6053e-17	5.03717e-16	0.00176113	1244.67	1735.33	ENSG00000144659	SLC25A38	solute carrier family 25 member 38 [Source:HGNC Symbol;Acc:HGNC:26054]
ENSG00000134809	786.238	0.572363	0.0683701	8.37154	5.68724e-17	5.10751e-16	0.0029698	580	896	ENSG00000134809	TIMM10	translocase of inner mitochondrial membrane 10 [Source:HGNC Symbol;Acc:HGNC:11814]
ENSG00000135124	848.962	-0.908446	0.108532	-8.37032	5.74636e-17	5.15727e-16	0.0102649	1205	667.333	ENSG00000135124	P2RX4	purinergic receptor P2X 4 [Source:HGNC Symbol;Acc:HGNC:8535]
ENSG00000143382	538.83	-0.94868	0.113387	-8.36676	5.9226e-17	5.31202e-16	0.0106953	774.333	418.167	ENSG00000143382	ADAMTSL4	ADAMTS like 4 [Source:HGNC Symbol;Acc:HGNC:19706]
ENSG00000177733	8046.52	0.324197	0.0387515	8.36606	5.95766e-17	5.34002e-16	0.0013058	6741	8756	ENSG00000177733	HNRNPA0	heterogeneous nuclear ribonucleoprotein A0 [Source:HGNC Symbol;Acc:HGNC:5030]
ENSG00000177294	56.2451	-2.03565	0.243393	-8.36363	6.08181e-17	5.4478e-16	0.0390439	111	28.1667	ENSG00000177294	FBXO39	F-box protein 39 [Source:HGNC Symbol;Acc:HGNC:28565]
ENSG00000159921	8006.94	-0.438488	0.0524636	-8.35794	6.38218e-17	5.71318e-16	0.00252856	9491.67	7258.17	ENSG00000159921	GNE	glucosamine (UDP-N-acetyl)-2-epimerase/N-acetylmannosamine kinase [Source:HGNC Symbol;Acc:HGNC:23657]
ENSG00000129932	568.145	0.69665	0.0833685	8.35628	6.47278e-17	5.79056e-16	0.00447547	392.667	660.333	ENSG00000129932	DOHH	deoxyhypusine hydroxylase [Source:HGNC Symbol;Acc:HGNC:28662]
ENSG00000196693	431.648	0.97044	0.116157	8.35452	6.57001e-17	5.87376e-16	0.00973591	257.333	523.667	ENSG00000196693	ZNF33B	zinc finger protein 33B [Source:HGNC Symbol;Acc:HGNC:13097]
ENSG00000137845	7592.46	-0.366646	0.043895	-8.3528	6.66652e-17	5.95623e-16	0.00172753	8731.33	7026.67	ENSG00000137845	ADAM10	ADAM metallopeptidase domain 10 [Source:HGNC Symbol;Acc:HGNC:188]
ENSG00000136367	136.347	-1.01767	0.121872	-8.3503	6.80914e-17	6.07974e-16	0.00772479	201.333	103.167	ENSG00000136367	ZFHX2	zinc finger homeobox 2 [Source:HGNC Symbol;Acc:HGNC:20152]
ENSG00000167553	12395.5	0.425603	0.0509839	8.3478	6.95464e-17	6.20568e-16	0.00240582	9871.33	13753.8	ENSG00000167553	TUBA1C	tubulin alpha 1c [Source:HGNC Symbol;Acc:HGNC:20768]
ENSG00000179820	6425.68	-0.662296	0.0793759	-8.3438	7.19424e-17	6.41536e-16	0.00591298	8343.67	5467.33	ENSG00000179820	MYADM	myeloid associated differentiation marker [Source:HGNC Symbol;Acc:HGNC:7544]
ENSG00000185885	552.624	-1.47605	0.176912	-8.34342	7.21696e-17	6.4315e-16	0.0284187	943.333	352.333	ENSG00000185885	IFITM1	interferon induced transmembrane protein 1 [Source:HGNC Symbol;Acc:HGNC:5412]
ENSG00000088325	25997.4	0.278364	0.0333708	8.34157	7.33136e-17	6.52928e-16	0.00102819	22285.3	28022.8	ENSG00000088325	TPX2	TPX2, microtubule nucleation factor [Source:HGNC Symbol;Acc:HGNC:1249]
ENSG00000023892	1198.14	-0.500002	0.0599956	-8.33398	7.8169e-17	6.95724e-16	0.00268834	1457	1068.83	ENSG00000023892	DEF6	DEF6, guanine nucleotide exchange factor [Source:HGNC Symbol;Acc:HGNC:2760]
ENSG00000091592	1821.47	-0.957908	0.114948	-8.33343	7.8532e-17	6.98508e-16	0.0122058	2621.67	1409	ENSG00000091592	NLRP1	NLR family pyrin domain containing 1 [Source:HGNC Symbol;Acc:HGNC:14374]
ENSG00000171877	2161.91	0.393852	0.0472783	8.3305	8.05039e-17	7.1559e-16	0.00162623	1749	2383	ENSG00000171877	FRMD5	FERM domain containing 5 [Source:HGNC Symbol;Acc:HGNC:28214]
ENSG00000126759	469.723	-0.750891	0.0901424	-8.33004	8.08122e-17	7.17872e-16	0.00588996	630.667	388.667	ENSG00000126759	CFP	complement factor properdin [Source:HGNC Symbol;Acc:HGNC:8864]
ENSG00000105426	1338.06	-0.67888	0.0815168	-8.3281	8.21474e-17	7.29268e-16	0.00570809	1748.33	1133.17	ENSG00000105426	PTPRS	protein tyrosine phosphatase, receptor type S [Source:HGNC Symbol;Acc:HGNC:9681]
ENSG00000171345	6202.02	-0.966386	0.116044	-8.32779	8.23667e-17	7.30749e-16	0.0127956	9001.33	4783.33	ENSG00000171345	KRT19	keratin 19 [Source:HGNC Symbol;Acc:HGNC:6436]
ENSG00000104897	2776.92	0.393271	0.0472298	8.32677	8.30812e-17	7.36618e-16	0.00173741	2245	3062.17	ENSG00000104897	SF3A2	splicing factor 3a subunit 2 [Source:HGNC Symbol;Acc:HGNC:10766]
ENSG00000198618	2155.48	0.365543	0.0439029	8.32617	8.35005e-17	7.39865e-16	0.00133361	1769	2363.67	ENSG00000198618	PPIAP22	peptidylprolyl isomerase A pseudogene 22 [Source:HGNC Symbol;Acc:HGNC:17236]
ENSG00000123989	2284.6	-0.480627	0.0577591	-8.32124	8.70507e-17	7.7083e-16	0.00280062	2758.67	2049.5	ENSG00000123989	CHPF	chondroitin polymerizing factor [Source:HGNC Symbol;Acc:HGNC:24291]
ENSG00000067225	73842	0.429671	0.051646	8.31954	8.83068e-17	7.81456e-16	0.00254758	58734.7	81955.8	ENSG00000067225	PKM	pyruvate kinase M1/2 [Source:HGNC Symbol;Acc:HGNC:9021]
ENSG00000185722	3214.95	0.536703	0.0645165	8.31885	8.88211e-17	7.85508e-16	0.00363192	2414	3640	ENSG00000185722	ANKFY1	ankyrin repeat and FYVE domain containing 1 [Source:HGNC Symbol;Acc:HGNC:20763]
ENSG00000005175	2146.08	0.391295	0.0470802	8.31126	9.46939e-17	8.36914e-16	0.00160482	1737.33	2364.5	ENSG00000005175	RPAP3	RNA polymerase II associated protein 3 [Source:HGNC Symbol;Acc:HGNC:26151]
ENSG00000129173	1046.16	0.565161	0.0680214	8.30858	9.68576e-17	8.55494e-16	0.00330508	775.333	1190.67	ENSG00000129173	E2F8	E2F transcription factor 8 [Source:HGNC Symbol;Acc:HGNC:24727]
ENSG00000145882	426.634	-0.793405	0.0955079	-8.30722	9.79709e-17	8.64778e-16	0.00665777	580	347.833	ENSG00000145882	PCYOX1L	prenylcysteine oxidase 1 like [Source:HGNC Symbol;Acc:HGNC:28477]
ENSG00000088812	3148.97	-0.416195	0.0501041	-8.30661	9.8478e-17	8.68245e-16	0.00211575	3696.67	2876	ENSG00000088812	ATRN	attractin [Source:HGNC Symbol;Acc:HGNC:885]
ENSG00000139372	1493.07	0.524929	0.0631943	8.30659	9.84884e-17	8.68245e-16	0.00304895	1131	1687	ENSG00000139372	TDG	thymine DNA glycosylase [Source:HGNC Symbol;Acc:HGNC:11700]
ENSG00000103811	985.88	-0.577295	0.0695142	-8.30471	1.00065e-16	8.81584e-16	0.00371549	1236.67	860.667	ENSG00000103811	CTSH	cathepsin H [Source:HGNC Symbol;Acc:HGNC:2535]
ENSG00000154803	2307.3	0.338789	0.0408132	8.30096	1.03278e-16	9.09315e-16	0.00112018	1916.67	2518	ENSG00000154803	FLCN	folliculin [Source:HGNC Symbol;Acc:HGNC:27310]
ENSG00000176422	359.701	0.690888	0.0832481	8.29914	1.04872e-16	9.22764e-16	0.00318891	249.667	418.167	ENSG00000176422	SPRYD4	SPRY domain containing 4 [Source:HGNC Symbol;Acc:HGNC:27468]
ENSG00000102103	1537.67	0.528773	0.0637268	8.29749	1.0633e-16	9.35005e-16	0.00313571	1162.33	1738	ENSG00000102103	PQBP1	polyglutamine binding protein 1 [Source:HGNC Symbol;Acc:HGNC:9330]
ENSG00000169258	1575.16	0.673117	0.0811509	8.29464	1.08915e-16	9.57133e-16	0.00554029	1104.67	1824.5	ENSG00000169258	GPRIN1	G protein regulated inducer of neurite outgrowth 1 [Source:HGNC Symbol;Acc:HGNC:24835]
ENSG00000196756	1809.08	0.501265	0.0604444	8.293	1.10429e-16	9.69829e-16	0.00286511	1384	2036.83	ENSG00000196756	SNHG17	small nucleolar RNA host gene 17 [Source:HGNC Symbol;Acc:HGNC:48600]
ENSG00000134046	1305.46	0.38343	0.0462605	8.2885	1.14686e-16	1.00658e-15	0.00119573	1061.33	1437.83	ENSG00000134046	MBD2	methyl-CpG binding domain protein 2 [Source:HGNC Symbol;Acc:HGNC:6917]
ENSG00000136327	105.68	-1.31124	0.158201	-8.2884	1.14786e-16	1.00682e-15	0.0155241	171.667	72	ENSG00000136327	NKX2-8	NK2 homeobox 8 [Source:HGNC Symbol;Acc:HGNC:16364]
ENSG00000151062	2524.36	-0.57008	0.0687901	-8.28724	1.15906e-16	1.016e-15	0.00418432	3149.33	2207.5	ENSG00000151062	CACNA2D4	calcium voltage-gated channel auxiliary subunit alpha2delta 4 [Source:HGNC Symbol;Acc:HGNC:20202]
ENSG00000169689	1772.49	0.446961	0.0539701	8.28164	1.21488e-16	1.06426e-15	0.00215173	1394.67	1974.5	ENSG00000169689	CENPX	centromere protein X [Source:HGNC Symbol;Acc:HGNC:11422]
ENSG00000197321	4571.08	-0.447457	0.0540315	-8.2814	1.21731e-16	1.06572e-15	0.00260189	5441.33	4138.5	ENSG00000197321	SVIL	supervillin [Source:HGNC Symbol;Acc:HGNC:11480]
ENSG00000109606	10474.2	0.290462	0.0350747	8.28124	1.21894e-16	1.06648e-15	0.00107781	8914.33	11316	ENSG00000109606	DHX15	DEAH-box helicase 15 [Source:HGNC Symbol;Acc:HGNC:2738]
ENSG00000099219	1233.82	-0.496852	0.0600055	-8.2801	1.23075e-16	1.07613e-15	0.00271152	1499	1102	ENSG00000099219	ERMP1	endoplasmic reticulum metallopeptidase 1 [Source:HGNC Symbol;Acc:HGNC:23703]
ENSG00000099250	8324.4	-0.568577	0.0686765	-8.27906	1.24156e-16	1.0849e-15	0.00442205	10423	7280.67	ENSG00000099250	NRP1	neuropilin 1 [Source:HGNC Symbol;Acc:HGNC:8004]
ENSG00000177679	104.686	-1.19879	0.144878	-8.27446	1.29042e-16	1.12689e-15	0.0116164	164.333	74.3333	ENSG00000177679	SRRM3	serine/arginine repetitive matrix 3 [Source:HGNC Symbol;Acc:HGNC:26729]
ENSG00000172915	906.448	-0.718778	0.086884	-8.27285	1.30796e-16	1.1415e-15	0.00625713	1200.33	756.833	ENSG00000172915	NBEA	neurobeachin [Source:HGNC Symbol;Acc:HGNC:7648]
ENSG00000182628	4393.25	0.632847	0.076499	8.27262	1.31047e-16	1.14297e-15	0.00534496	3143	5055	ENSG00000182628	SKA2	spindle and kinetochore associated complex subunit 2 [Source:HGNC Symbol;Acc:HGNC:28006]
ENSG00000170412	836.171	-0.818599	0.0989702	-8.27117	1.32652e-16	1.15624e-15	0.00833849	1152.33	675.667	ENSG00000170412	GPRC5C	G protein-coupled receptor class C group 5 member C [Source:HGNC Symbol;Acc:HGNC:13309]
ENSG00000177889	5433.26	0.266425	0.0322199	8.26897	1.35119e-16	1.177e-15	0.000797863	4680	5843.17	ENSG00000177889	UBE2N	ubiquitin conjugating enzyme E2 N [Source:HGNC Symbol;Acc:HGNC:12492]
ENSG00000106144	2029.87	0.740308	0.0895381	8.26807	1.36139e-16	1.18515e-15	0.00707685	1372.67	2376.83	ENSG00000106144	CASP2	caspase 2 [Source:HGNC Symbol;Acc:HGNC:1503]
ENSG00000108518	40744	0.355499	0.0429985	8.26771	1.36558e-16	1.18805e-15	0.00174924	33618.7	44608.5	ENSG00000108518	PFN1	profilin 1 [Source:HGNC Symbol;Acc:HGNC:8881]
ENSG00000198873	1254.61	-0.57052	0.0690248	-8.26545	1.39173e-16	1.21005e-15	0.00384842	1569	1096.83	ENSG00000198873	GRK5	G protein-coupled receptor kinase 5 [Source:HGNC Symbol;Acc:HGNC:4544]
ENSG00000142227	4604.37	0.432359	0.052319	8.2639	1.40994e-16	1.22512e-15	0.0023823	3656.67	5114.67	ENSG00000142227	EMP3	epithelial membrane protein 3 [Source:HGNC Symbol;Acc:HGNC:3335]
ENSG00000104763	2796.7	-0.343429	0.041561	-8.26324	1.41771e-16	1.2311e-15	0.00132222	3185.33	2605.33	ENSG00000104763	ASAH1	N-acylsphingosine amidohydrolase 1 [Source:HGNC Symbol;Acc:HGNC:735]
ENSG00000168067	1183.05	-0.46986	0.0568643	-8.26283	1.4226e-16	1.23457e-15	0.0023239	1419.33	1065.17	ENSG00000168067	MAP4K2	mitogen-activated protein kinase kinase kinase kinase 2 [Source:HGNC Symbol;Acc:HGNC:6864]
ENSG00000181938	572.593	0.882235	0.106775	8.26254	1.42607e-16	1.23682e-15	0.00860726	359	685.667	ENSG00000181938	GINS3	GINS complex subunit 3 [Source:HGNC Symbol;Acc:HGNC:25851]
ENSG00000103168	948.999	0.475717	0.0575815	8.26162	1.43705e-16	1.24556e-15	0.00196586	735.667	1062.67	ENSG00000103168	TAF1C	TATA-box binding protein associated factor, RNA polymerase I subunit C [Source:HGNC Symbol;Acc:HGNC:11534]
ENSG00000118276	1943.34	-0.336972	0.0407883	-8.26149	1.4387e-16	1.24622e-15	0.00111239	2207	1814	ENSG00000118276	B4GALT6	beta-1,4-galactosyltransferase 6 [Source:HGNC Symbol;Acc:HGNC:929]
ENSG00000074219	487.161	-0.591693	0.0716452	-8.25866	1.47315e-16	1.27526e-15	0.00305758	614.333	423	ENSG00000074219	TEAD2	TEA domain transcription factor 2 [Source:HGNC Symbol;Acc:HGNC:11715]
ENSG00000073350	468.607	-0.815436	0.0987578	-8.25693	1.49465e-16	1.29285e-15	0.00745597	643	379.833	ENSG00000073350	LLGL2	LLGL2, scribble cell polarity complex component [Source:HGNC Symbol;Acc:HGNC:6629]
ENSG00000198464	553.418	0.64833	0.0785199	8.25688	1.49532e-16	1.29285e-15	0.00370321	392.667	639	ENSG00000198464	ZNF480	zinc finger protein 480 [Source:HGNC Symbol;Acc:HGNC:23305]
ENSG00000111361	2140.14	0.51583	0.0624896	8.25465	1.52347e-16	1.31637e-15	0.0032038	1624.67	2413.33	ENSG00000111361	EIF2B1	eukaryotic translation initiation factor 2B subunit alpha [Source:HGNC Symbol;Acc:HGNC:3257]
ENSG00000164442	4161.56	0.511727	0.0620163	8.2515	1.56425e-16	1.35077e-15	0.003414	3169.33	4692.67	ENSG00000164442	CITED2	Cbp/p300 interacting transactivator with Glu/Asp rich carboxy-terminal domain 2 [Source:HGNC Symbol;Acc:HGNC:1987]
ENSG00000132623	439.454	-0.850538	0.103116	-8.24837	1.60576e-16	1.38575e-15	0.00817736	611.333	351.667	ENSG00000132623	ANKEF1	ankyrin repeat and EF-hand domain containing 1 [Source:HGNC Symbol;Acc:HGNC:15803]
ENSG00000160131	3368.04	0.366827	0.0444852	8.24604	1.63726e-16	1.41206e-15	0.00156957	2761.33	3695.67	ENSG00000160131	VMA21	VMA21, vacuolar ATPase assembly factor [Source:HGNC Symbol;Acc:HGNC:22082]
ENSG00000162144	976.307	0.595506	0.0722578	8.24141	1.70192e-16	1.46692e-15	0.00378113	712	1115.5	ENSG00000162144	CYB561A3	cytochrome b561 family member A3 [Source:HGNC Symbol;Acc:HGNC:23014]
ENSG00000130304	979.631	-1.11496	0.135304	-8.24046	1.71552e-16	1.47773e-15	0.0166789	1496	717.5	ENSG00000130304	SLC27A1	solute carrier family 27 member 1 [Source:HGNC Symbol;Acc:HGNC:10995]
ENSG00000105221	3707.11	0.259793	0.0315311	8.23927	1.73265e-16	1.49155e-15	0.000663318	3203.67	3983.17	ENSG00000105221	AKT2	AKT serine/threonine kinase 2 [Source:HGNC Symbol;Acc:HGNC:392]
ENSG00000139946	592.589	-0.830984	0.10086	-8.23903	1.73618e-16	1.49368e-15	0.00826115	818.333	478.167	ENSG00000139946	PELI2	pellino E3 ubiquitin protein ligase family member 2 [Source:HGNC Symbol;Acc:HGNC:8828]
ENSG00000037474	7032.43	0.520087	0.063133	8.23796	1.75166e-16	1.50606e-15	0.00366279	5332	7940.5	ENSG00000037474	NSUN2	NOP2/Sun RNA methyltransferase family member 2 [Source:HGNC Symbol;Acc:HGNC:25994]
ENSG00000039560	11462.4	-0.650407	0.0789655	-8.23659	1.77188e-16	1.5225e-15	0.00591252	14793.3	9787.17	ENSG00000039560	RAI14	retinoic acid induced 14 [Source:HGNC Symbol;Acc:HGNC:14873]
ENSG00000120738	382.711	-0.841768	0.102211	-8.2356	1.78655e-16	1.53416e-15	0.00769652	531.667	307.667	ENSG00000120738	EGR1	early growth response 1 [Source:HGNC Symbol;Acc:HGNC:3238]
ENSG00000184384	2480.14	-0.778034	0.0944913	-8.23392	1.81183e-16	1.55491e-15	0.00821675	3358.33	2035	ENSG00000184384	MAML2	mastermind like transcriptional coactivator 2 [Source:HGNC Symbol;Acc:HGNC:16259]
ENSG00000254635	413.005	0.663856	0.0806576	8.23055	1.86361e-16	1.59836e-15	0.00325776	290.667	477.667	ENSG00000254635	WAC-AS1	WAC antisense RNA 1 (head to head) [Source:HGNC Symbol;Acc:HGNC:27347]
ENSG00000137094	611.519	-0.542025	0.0658729	-8.22835	1.89815e-16	1.62699e-15	0.00266781	755.667	538.833	ENSG00000137094	DNAJB5	DnaJ heat shock protein family (Hsp40) member B5 [Source:HGNC Symbol;Acc:HGNC:14887]
ENSG00000155592	1028.54	0.596406	0.0725328	8.22257	1.99193e-16	1.70632e-15	0.00388195	750	1176.5	ENSG00000155592	ZKSCAN2	zinc finger with KRAB and SCAN domains 2 [Source:HGNC Symbol;Acc:HGNC:25677]
ENSG00000005020	1538.67	-0.460192	0.0559704	-8.22207	2.00024e-16	1.71238e-15	0.00240719	1841	1388.5	ENSG00000005020	SKAP2	src kinase associated phosphoprotein 2 [Source:HGNC Symbol;Acc:HGNC:15687]
ENSG00000100596	8099.01	-0.245318	0.0298385	-8.22153	2.00924e-16	1.71903e-15	0.000736958	8837.67	7740.67	ENSG00000100596	SPTLC2	serine palmitoyltransferase long chain base subunit 2 [Source:HGNC Symbol;Acc:HGNC:11278]
ENSG00000259494	606.672	0.530617	0.0645482	8.22047	2.02703e-16	1.73319e-15	0.00205995	457.667	686.333	ENSG00000259494	MRPL46	mitochondrial ribosomal protein L46 [Source:HGNC Symbol;Acc:HGNC:1192]
ENSG00000151553	2208.86	-0.368183	0.0448116	-8.21625	2.0996e-16	1.79414e-15	0.00150382	2540.33	2044.17	ENSG00000151553	FAM160B1	family with sequence similarity 160 member B1 [Source:HGNC Symbol;Acc:HGNC:29320]
ENSG00000189159	5074.99	0.386066	0.0470097	8.21247	2.16676e-16	1.85038e-15	0.00190184	4121.67	5588.83	ENSG00000189159	JPT1	Jupiter microtubule associated homolog 1 [Source:HGNC Symbol;Acc:HGNC:14569]
ENSG00000167074	199.095	-0.871667	0.106142	-8.21229	2.17006e-16	1.85207e-15	0.00633047	279.333	158.5	ENSG00000167074	TEF	TEF, PAR bZIP transcription factor [Source:HGNC Symbol;Acc:HGNC:11722]
ENSG00000086300	287.456	-0.863912	0.105202	-8.21193	2.17668e-16	1.85658e-15	0.00751877	402	229.167	ENSG00000086300	SNX10	sorting nexin 10 [Source:HGNC Symbol;Acc:HGNC:14974]
ENSG00000037241	1695.79	0.355903	0.0433429	8.21132	2.18778e-16	1.8649e-15	0.00114805	1397.33	1855.83	ENSG00000037241	RPL26L1	ribosomal protein L26 like 1 [Source:HGNC Symbol;Acc:HGNC:17050]
ENSG00000181026	2963.93	0.497249	0.0605774	8.20848	2.24001e-16	1.90826e-15	0.00313262	2271.67	3334.67	ENSG00000181026	AEN	apoptosis enhancing nuclease [Source:HGNC Symbol;Acc:HGNC:25722]
ENSG00000134531	11884.2	-0.263808	0.0321531	-8.20475	2.31064e-16	1.96723e-15	0.000912869	13086	11304.7	ENSG00000134531	EMP1	epithelial membrane protein 1 [Source:HGNC Symbol;Acc:HGNC:3333]
ENSG00000122643	1059.9	0.495883	0.0604931	8.19735	2.45738e-16	2.09087e-15	0.00241663	813.333	1192.17	ENSG00000122643	NT5C3A	5'-nucleotidase, cytosolic IIIA [Source:HGNC Symbol;Acc:HGNC:17820]
ENSG00000165322	1829.66	-0.334688	0.0408346	-8.19618	2.4814e-16	2.11003e-15	0.00108565	2076.33	1709	ENSG00000165322	ARHGAP12	Rho GTPase activating protein 12 [Source:HGNC Symbol;Acc:HGNC:16348]
ENSG00000151353	1915.75	0.427281	0.0521386	8.19511	2.50367e-16	2.12766e-15	0.00201721	1524.33	2125.33	ENSG00000151353	TMEM18	transmembrane protein 18 [Source:HGNC Symbol;Acc:HGNC:25257]
ENSG00000083812	375.385	0.793543	0.0968618	8.19253	2.55786e-16	2.17238e-15	0.00555691	246.333	443.5	ENSG00000083812	ZNF324	zinc finger protein 324 [Source:HGNC Symbol;Acc:HGNC:14096]
ENSG00000158246	272.263	0.962419	0.11751	8.1901	2.61013e-16	2.21542e-15	0.00816495	163	329.333	ENSG00000158246	TENT5B	terminal nucleotidyltransferase 5B [Source:HGNC Symbol;Acc:HGNC:28273]
ENSG00000110583	1273.61	0.486424	0.0594178	8.1865	2.68937e-16	2.2813e-15	0.0024799	981	1428.83	ENSG00000110583	NAA40	N(alpha)-acetyltransferase 40, NatD catalytic subunit [Source:HGNC Symbol;Acc:HGNC:25845]
ENSG00000133641	1011.8	0.449095	0.0548706	8.18461	2.73194e-16	2.31599e-15	0.00175879	795.667	1127.5	ENSG00000133641	C12orf29	chromosome 12 open reading frame 29 [Source:HGNC Symbol;Acc:HGNC:25322]
ENSG00000177666	2722.84	-0.464713	0.0568122	-8.17981	2.84296e-16	2.40864e-15	0.00276083	3262	2453.67	ENSG00000177666	PNPLA2	patatin like phospholipase domain containing 2 [Source:HGNC Symbol;Acc:HGNC:30802]
ENSG00000196358	137.482	-1.00935	0.123397	-8.17972	2.84515e-16	2.40903e-15	0.00813763	202.333	104.333	ENSG00000196358	NTNG2	netrin G2 [Source:HGNC Symbol;Acc:HGNC:14288]
ENSG00000198894	1541.55	0.421937	0.0515851	8.17943	2.85201e-16	2.41338e-15	0.00181895	1229.33	1709	ENSG00000198894	CIPC	CLOCK interacting pacemaker [Source:HGNC Symbol;Acc:HGNC:20365]
ENSG00000147853	1500.05	-0.432137	0.0528367	-8.17872	2.86869e-16	2.42468e-15	0.00206165	1773	1364.5	ENSG00000147853	AK3	adenylate kinase 3 [Source:HGNC Symbol;Acc:HGNC:17376]
ENSG00000122140	2214.84	0.480169	0.0587095	8.17872	2.86885e-16	2.42468e-15	0.00278844	1715	2482.67	ENSG00000122140	MRPS2	mitochondrial ribosomal protein S2 [Source:HGNC Symbol;Acc:HGNC:14495]
ENSG00000099800	1368.83	0.553057	0.0676262	8.17815	2.88236e-16	2.43461e-15	0.00352606	1021	1553.67	ENSG00000099800	TIMM13	translocase of inner mitochondrial membrane 13 [Source:HGNC Symbol;Acc:HGNC:11816]
ENSG00000161714	3898.31	0.370946	0.0453654	8.17685	2.91364e-16	2.45954e-15	0.00169035	3192.33	4279.17	ENSG00000161714	PLCD3	phospholipase C delta 3 [Source:HGNC Symbol;Acc:HGNC:9061]
ENSG00000120129	4126.33	-0.660593	0.0808813	-8.16743	3.15021e-16	2.65763e-15	0.00606606	5332.67	3508.17	ENSG00000120129	DUSP1	dual specificity phosphatase 1 [Source:HGNC Symbol;Acc:HGNC:3064]
ENSG00000225921	3459.47	0.348028	0.0426164	8.16655	3.17346e-16	2.67562e-15	0.0014238	2861.33	3782.33	ENSG00000225921	NOL7	nucleolar protein 7 [Source:HGNC Symbol;Acc:HGNC:21040]
ENSG00000180098	662.388	0.517841	0.063418	8.16553	3.20036e-16	2.69667e-15	0.00209175	502.667	747.333	ENSG00000180098	TRNAU1AP	tRNA selenocysteine 1 associated protein 1 [Source:HGNC Symbol;Acc:HGNC:30813]
ENSG00000116752	2456.48	0.385082	0.0471615	8.16518	3.2095e-16	2.70273e-15	0.0016795	1995.67	2706	ENSG00000116752	BCAS2	BCAS2, pre-mRNA processing factor [Source:HGNC Symbol;Acc:HGNC:975]
ENSG00000142494	537.575	-0.562454	0.0689257	-8.1603	3.34204e-16	2.81265e-15	0.00286062	669.333	471	ENSG00000142494	SLC47A1	solute carrier family 47 member 1 [Source:HGNC Symbol;Acc:HGNC:25588]
ENSG00000155097	3986.41	0.383327	0.0469762	8.16004	3.34916e-16	2.81693e-15	0.00183851	3241.33	4385.5	ENSG00000155097	ATP6V1C1	ATPase H+ transporting V1 subunit C1 [Source:HGNC Symbol;Acc:HGNC:856]
ENSG00000137801	9503.01	0.439571	0.0538891	8.15696	3.43565e-16	2.88794e-15	0.00267007	7517.67	10570.3	ENSG00000137801	THBS1	thrombospondin 1 [Source:HGNC Symbol;Acc:HGNC:11785]
ENSG00000106591	1041.27	0.527675	0.0647313	8.15178	3.58604e-16	3.01253e-15	0.0028948	786.667	1177.5	ENSG00000106591	MRPL32	mitochondrial ribosomal protein L32 [Source:HGNC Symbol;Acc:HGNC:14035]
ENSG00000196419	21526.7	0.244739	0.0300429	8.14632	3.75181e-16	3.14989e-15	0.000817202	18743	23048.3	ENSG00000196419	XRCC6	X-ray repair cross complementing 6 [Source:HGNC Symbol;Acc:HGNC:4055]
ENSG00000164902	3474.65	0.43416	0.0532978	8.14593	3.76379e-16	3.15805e-15	0.00240082	2756.33	3860.83	ENSG00000164902	PHAX	phosphorylated adaptor for RNA export [Source:HGNC Symbol;Acc:HGNC:10241]
ENSG00000122420	60.6815	-1.49483	0.183583	-8.14253	3.87112e-16	3.24615e-15	0.0172778	104	38.3333	ENSG00000122420	PTGFR	prostaglandin F receptor [Source:HGNC Symbol;Acc:HGNC:9600]
ENSG00000107651	4678.4	0.296145	0.0364004	8.13578	4.09291e-16	3.43006e-15	0.00103927	3972.67	5062.83	ENSG00000107651	SEC23IP	SEC23 interacting protein [Source:HGNC Symbol;Acc:HGNC:17018]
ENSG00000163053	60.3344	-2.047	0.251615	-8.13542	4.10498e-16	3.4381e-15	0.0440923	119	29.8333	ENSG00000163053	SLC16A14	solute carrier family 16 member 14 [Source:HGNC Symbol;Acc:HGNC:26417]
ENSG00000138160	9905.14	0.416061	0.0511461	8.13475	4.12783e-16	3.45516e-15	0.00239898	7924	10967.5	ENSG00000138160	KIF11	kinesin family member 11 [Source:HGNC Symbol;Acc:HGNC:6388]
ENSG00000142961	302.264	-0.696273	0.0855975	-8.13427	4.14444e-16	3.46698e-15	0.00404779	396.667	254.333	ENSG00000142961	MOB3C	MOB kinase activator 3C [Source:HGNC Symbol;Acc:HGNC:29800]
ENSG00000110514	5650.04	-0.33121	0.0407222	-8.13341	4.17395e-16	3.48957e-15	0.00142602	6399	5280.67	ENSG00000110514	MADD	MAP kinase activating death domain [Source:HGNC Symbol;Acc:HGNC:6766]
ENSG00000066697	2819.24	0.31855	0.0391755	8.13137	4.24473e-16	3.54662e-15	0.00108393	2367.33	3063.17	ENSG00000066697	MSANTD3	Myb/SANT DNA binding domain containing 3 [Source:HGNC Symbol;Acc:HGNC:23370]
ENSG00000070423	2288.68	0.658491	0.0809902	8.1305	4.27526e-16	3.56999e-15	0.00576374	1617.33	2647.5	ENSG00000070423	RNF126	ring finger protein 126 [Source:HGNC Symbol;Acc:HGNC:21151]
ENSG00000170540	8768.23	0.487621	0.0599782	8.12997	4.29399e-16	3.58347e-15	0.00332413	6769.67	9835.33	ENSG00000170540	ARL6IP1	ADP ribosylation factor like GTPase 6 interacting protein 1 [Source:HGNC Symbol;Acc:HGNC:697]
ENSG00000183431	5774.75	0.32207	0.0396198	8.12903	4.32746e-16	3.60924e-15	0.00131736	4842.33	6281.17	ENSG00000183431	SF3A3	splicing factor 3a subunit 3 [Source:HGNC Symbol;Acc:HGNC:10767]
ENSG00000103653	6764.88	0.341921	0.0420809	8.12532	4.46188e-16	3.71912e-15	0.00153754	5618.33	7385	ENSG00000103653	CSK	C-terminal Src kinase [Source:HGNC Symbol;Acc:HGNC:2444]
ENSG00000163125	2987.34	0.454312	0.0559204	8.12426	4.50093e-16	3.74943e-15	0.00261991	2344.33	3332.67	ENSG00000163125	RPRD2	regulation of nuclear pre-mRNA domain containing 2 [Source:HGNC Symbol;Acc:HGNC:29039]
ENSG00000115112	211.625	-0.847189	0.104299	-8.12267	4.56032e-16	3.79663e-15	0.00621723	293.667	169.667	ENSG00000115112	TFCP2L1	transcription factor CP2 like 1 [Source:HGNC Symbol;Acc:HGNC:17925]
ENSG00000196313	3107.57	0.454257	0.0559345	8.12123	4.6148e-16	3.83969e-15	0.00263635	2440.33	3469.17	ENSG00000196313	POM121	POM121 transmembrane nucleoporin [Source:HGNC Symbol;Acc:HGNC:19702]
ENSG00000196776	3577.25	-0.330189	0.0406671	-8.11932	4.68818e-16	3.89841e-15	0.00132465	4048	3344.17	ENSG00000196776	CD47	CD47 molecule [Source:HGNC Symbol;Acc:HGNC:1682]
ENSG00000140406	1898.46	0.387209	0.0477374	8.11124	5.01077e-16	4.16418e-15	0.0015971	1541.33	2091.5	ENSG00000140406	TLNRD1	talin rod domain containing 1 [Source:HGNC Symbol;Acc:HGNC:13519]
ENSG00000157911	462.87	0.627463	0.0773971	8.10707	5.18542e-16	4.30675e-15	0.00312005	332	532.167	ENSG00000157911	PEX10	peroxisomal biogenesis factor 10 [Source:HGNC Symbol;Acc:HGNC:8851]
ENSG00000117450	7682.47	0.413165	0.0509642	8.10697	5.18982e-16	4.30783e-15	0.00234809	6158.33	8498.5	ENSG00000117450	PRDX1	peroxiredoxin 1 [Source:HGNC Symbol;Acc:HGNC:9352]
ENSG00000127423	392.052	0.671974	0.0828893	8.10688	5.19358e-16	4.30838e-15	0.00344047	275	454.5	ENSG00000127423	AUNIP	aurora kinase A and ninein interacting protein [Source:HGNC Symbol;Acc:HGNC:28363]
ENSG00000144426	1952.62	-0.562843	0.0694402	-8.10543	5.25595e-16	4.35752e-15	0.00416412	2433.67	1711.33	ENSG00000144426	NBEAL1	neurobeachin like 1 [Source:HGNC Symbol;Acc:HGNC:20681]
ENSG00000101213	571.094	-0.74124	0.0914891	-8.10196	5.40826e-16	4.48113e-15	0.00646347	760.333	473.5	ENSG00000101213	PTK6	protein tyrosine kinase 6 [Source:HGNC Symbol;Acc:HGNC:9617]
ENSG00000078401	873.687	0.600432	0.0741415	8.09846	5.56593e-16	4.60903e-15	0.00389852	634.667	999.667	ENSG00000078401	EDN1	endothelin 1 [Source:HGNC Symbol;Acc:HGNC:3176]
ENSG00000121691	2796.98	-0.493312	0.0609191	-8.09782	5.59529e-16	4.63059e-15	0.00323571	3396.67	2500	ENSG00000121691	CAT	catalase [Source:HGNC Symbol;Acc:HGNC:1516]
ENSG00000155906	583.887	0.553692	0.0683939	8.09563	5.69665e-16	4.71167e-15	0.00245881	435	663	ENSG00000155906	RMND1	required for meiotic nuclear division 1 homolog [Source:HGNC Symbol;Acc:HGNC:21176]
ENSG00000075391	3592.32	0.39712	0.0490751	8.09209	5.86482e-16	4.84788e-15	0.00199993	2896.67	3964	ENSG00000075391	RASAL2	RAS protein activator like 2 [Source:HGNC Symbol;Acc:HGNC:9874]
ENSG00000185122	4855.54	0.342854	0.0423781	8.09035	5.9492e-16	4.91471e-15	0.00149708	4028.33	5300.17	ENSG00000185122	HSF1	heat shock transcription factor 1 [Source:HGNC Symbol;Acc:HGNC:5224]
ENSG00000079308	908.814	0.752379	0.093017	8.08862	6.03441e-16	4.98215e-15	0.0069076	610.333	1066.5	ENSG00000079308	TNS1	tensin 1 [Source:HGNC Symbol;Acc:HGNC:11973]
ENSG00000197930	14950.1	-0.28453	0.0351772	-8.08848	6.04157e-16	4.9851e-15	0.00112527	16613	14148.3	ENSG00000197930	ERO1A	endoplasmic reticulum oxidoreductase 1 alpha [Source:HGNC Symbol;Acc:HGNC:13280]
ENSG00000132661	1150.19	0.410758	0.0507947	8.08663	6.13376e-16	5.05817e-15	0.00149368	922.333	1272.33	ENSG00000132661	NXT1	nuclear transport factor 2 like export factor 1 [Source:HGNC Symbol;Acc:HGNC:15913]
ENSG00000185900	1371.21	0.490537	0.0606816	8.08378	6.27914e-16	5.175e-15	0.00268965	1056	1539.67	ENSG00000185900	POMK	protein-O-mannose kinase [Source:HGNC Symbol;Acc:HGNC:26267]
ENSG00000244045	448.996	0.648846	0.0802787	8.08242	6.34932e-16	5.22974e-15	0.00345412	318.333	518.167	ENSG00000244045	TMEM199	transmembrane protein 199 [Source:HGNC Symbol;Acc:HGNC:18085]
ENSG00000132153	7625.7	0.235992	0.0292062	8.0802	6.46595e-16	5.32265e-15	0.00067863	6668	8148.67	ENSG00000132153	DHX30	DExH-box helicase 30 [Source:HGNC Symbol;Acc:HGNC:16716]
ENSG00000112769	1581.7	-0.883997	0.109444	-8.07715	6.6298e-16	5.4543e-15	0.0109437	2228.33	1253.33	ENSG00000112769	LAMA4	laminin subunit alpha 4 [Source:HGNC Symbol;Acc:HGNC:6484]
ENSG00000171453	1319.19	0.532546	0.0659369	8.07661	6.65943e-16	5.47545e-15	0.00328287	994	1491.5	ENSG00000171453	POLR1C	RNA polymerase I and III subunit C [Source:HGNC Symbol;Acc:HGNC:20194]
ENSG00000167004	14409.8	-0.313404	0.038818	-8.07367	6.8218e-16	5.60563e-15	0.00138208	16209.3	13535.2	ENSG00000167004	PDIA3	protein disulfide isomerase family A member 3 [Source:HGNC Symbol;Acc:HGNC:4606]
ENSG00000101216	1431.06	0.349927	0.0433466	8.07277	6.87236e-16	5.64385e-15	0.00102846	1183.33	1565.33	ENSG00000101216	GMEB2	glucocorticoid modulatory element binding protein 2 [Source:HGNC Symbol;Acc:HGNC:4371]
ENSG00000135090	5090.82	-0.359632	0.0445513	-8.07231	6.89802e-16	5.66158e-15	0.00172223	5832	4724.5	ENSG00000135090	TAOK3	TAO kinase 3 [Source:HGNC Symbol;Acc:HGNC:18133]
ENSG00000167716	720.05	0.540041	0.0669136	8.07073	6.98811e-16	5.73214e-15	0.00265908	540.333	815.667	ENSG00000167716	WDR81	WD repeat domain 81 [Source:HGNC Symbol;Acc:HGNC:26600]
ENSG00000103495	1611.18	0.539366	0.0668477	8.06858	7.11186e-16	5.83021e-15	0.00355958	1211.33	1824.33	ENSG00000103495	MAZ	MYC associated zinc finger protein [Source:HGNC Symbol;Acc:HGNC:6914]
ENSG00000062485	5830.36	0.295824	0.0366717	8.06683	7.21471e-16	5.91105e-15	0.00110453	4950.33	6306.17	ENSG00000062485	CS	citrate synthase [Source:HGNC Symbol;Acc:HGNC:2422]
ENSG00000164509	1604.43	-0.341409	0.0423293	-8.06555	7.29068e-16	5.96978e-15	0.00113309	1824.67	1494.83	ENSG00000164509	IL31RA	interleukin 31 receptor A [Source:HGNC Symbol;Acc:HGNC:18969]
ENSG00000126562	254.404	-1.26387	0.156717	-8.06466	7.3439e-16	6.00982e-15	0.020065	404.667	176.167	ENSG00000126562	WNK4	WNK lysine deficient protein kinase 4 [Source:HGNC Symbol;Acc:HGNC:14544]
ENSG00000071994	2165.7	0.412142	0.0511153	8.06299	7.44517e-16	6.08912e-15	0.00198691	1735.67	2397.17	ENSG00000071994	PDCD2	programmed cell death 2 [Source:HGNC Symbol;Acc:HGNC:8762]
ENSG00000111907	220.226	-0.959953	0.119124	-8.0584	7.72975e-16	6.31815e-15	0.0095802	318.667	170.167	ENSG00000111907	TPD52L1	TPD52 like 1 [Source:HGNC Symbol;Acc:HGNC:12006]
ENSG00000156587	1179.37	-0.887325	0.110119	-8.05784	7.76521e-16	6.34341e-15	0.0108932	1664	933.833	ENSG00000156587	UBE2L6	ubiquitin conjugating enzyme E2 L6 [Source:HGNC Symbol;Acc:HGNC:12490]
ENSG00000090975	932.49	-0.396454	0.0492037	-8.0574	7.7937e-16	6.36295e-15	0.00132238	1085.67	856.167	ENSG00000090975	PITPNM2	phosphatidylinositol transfer protein membrane associated 2 [Source:HGNC Symbol;Acc:HGNC:21044]
ENSG00000175445	366.375	-0.799663	0.0992566	-8.05652	7.84996e-16	6.40512e-15	0.00701367	500.333	297.833	ENSG00000175445	LPL	lipoprotein lipase [Source:HGNC Symbol;Acc:HGNC:6677]
ENSG00000241258	1420.32	0.383405	0.0476113	8.05283	8.09001e-16	6.59713e-15	0.001387	1154.33	1563.67	ENSG00000241258	CRCP	CGRP receptor component [Source:HGNC Symbol;Acc:HGNC:17888]
ENSG00000106733	100.656	-1.21024	0.150326	-8.05076	8.22823e-16	6.70249e-15	0.0128123	158.333	71.1667	ENSG00000106733	NMRK1	nicotinamide riboside kinase 1 [Source:HGNC Symbol;Acc:HGNC:26057]
ENSG00000198515	57.4166	-1.77211	0.220118	-8.05075	8.22884e-16	6.70249e-15	0.0299557	106.333	32.3333	ENSG00000198515	CNGA1	cyclic nucleotide gated channel alpha 1 [Source:HGNC Symbol;Acc:HGNC:2148]
ENSG00000196235	4523.08	0.304764	0.0378894	8.04352	8.72964e-16	7.10623e-15	0.00113691	3823	4903.83	ENSG00000196235	SUPT5H	SPT5 homolog, DSIF elongation factor subunit [Source:HGNC Symbol;Acc:HGNC:11469]
ENSG00000133805	1096.8	-0.736666	0.0915941	-8.04273	8.78585e-16	7.14781e-15	0.00723898	1462.67	911.667	ENSG00000133805	AMPD3	adenosine monophosphate deaminase 3 [Source:HGNC Symbol;Acc:HGNC:470]
ENSG00000146678	575.723	0.839661	0.104425	8.04079	8.92616e-16	7.25772e-15	0.00818198	368.667	684.833	ENSG00000146678	IGFBP1	insulin like growth factor binding protein 1 [Source:HGNC Symbol;Acc:HGNC:5469]
ENSG00000145107	381.763	0.757453	0.0942249	8.03878	9.07376e-16	7.37342e-15	0.00517752	255.333	448.667	ENSG00000145107	TM4SF19	transmembrane 4 L six family member 19 [Source:HGNC Symbol;Acc:HGNC:25167]
ENSG00000178252	6198.23	0.346164	0.0430627	8.0386	9.08703e-16	7.3799e-15	0.00160261	5125	6771.83	ENSG00000178252	WDR6	WD repeat domain 6 [Source:HGNC Symbol;Acc:HGNC:12758]
ENSG00000154743	948.811	0.495348	0.0616401	8.03613	9.27209e-16	7.5258e-15	0.00242265	728.333	1066.67	ENSG00000154743	TSEN2	tRNA splicing endonuclease subunit 2 [Source:HGNC Symbol;Acc:HGNC:28422]
ENSG00000176438	1978.73	-0.40431	0.0503334	-8.03265	9.5388e-16	7.73776e-15	0.00196173	2310.67	1813.5	ENSG00000176438	SYNE3	spectrin repeat containing nuclear envelope family member 3 [Source:HGNC Symbol;Acc:HGNC:19861]
ENSG00000108671	11209.1	0.243034	0.0302683	8.02934	9.79968e-16	7.94476e-15	0.000784211	9768.33	11994.8	ENSG00000108671	PSMD11	proteasome 26S subunit, non-ATPase 11 [Source:HGNC Symbol;Acc:HGNC:9556]
ENSG00000110395	8034.99	-0.50914	0.0634116	-8.02913	9.81669e-16	7.95392e-15	0.00374906	9799.33	7154.67	ENSG00000110395	CBL	Cbl proto-oncogene [Source:HGNC Symbol;Acc:HGNC:1541]
ENSG00000124920	2983.15	-0.657685	0.0819209	-8.0283	9.88363e-16	8.0035e-15	0.00614435	3857.67	2542	ENSG00000124920	MYRF	myelin regulatory factor [Source:HGNC Symbol;Acc:HGNC:1181]
ENSG00000151465	3469.7	0.278646	0.0347112	8.02754	9.94465e-16	8.04822e-15	0.000843984	2970.67	3739.83	ENSG00000151465	CDC123	cell division cycle 123 [Source:HGNC Symbol;Acc:HGNC:16827]
ENSG00000182473	3696.66	0.39787	0.0495724	8.02603	1.00674e-15	8.14287e-15	0.00205588	2984.67	4078.33	ENSG00000182473	EXOC7	exocyst complex component 7 [Source:HGNC Symbol;Acc:HGNC:23214]
ENSG00000164951	1515.01	-0.381348	0.0475331	-8.02279	1.03373e-15	8.35629e-15	0.00155162	1753	1396.67	ENSG00000164951	PDP1	pyruvate dehyrogenase phosphatase catalytic subunit 1 [Source:HGNC Symbol;Acc:HGNC:9279]
ENSG00000149084	3453.05	-0.439641	0.0548068	-8.02165	1.0433e-15	8.42878e-15	0.00261686	4094.67	3136.17	ENSG00000149084	HSD17B12	hydroxysteroid 17-beta dehydrogenase 12 [Source:HGNC Symbol;Acc:HGNC:18646]
ENSG00000161091	2615.3	0.38478	0.0479993	8.01636	1.08924e-15	8.79482e-15	0.00178394	2126	2880.5	ENSG00000161091	MFSD12	major facilitator superfamily domain containing 12 [Source:HGNC Symbol;Acc:HGNC:28299]
ENSG00000188938	647.828	0.497887	0.0621502	8.01104	1.13745e-15	9.17873e-15	0.00191123	497	728.167	ENSG00000188938	FAM120AOS	family with sequence similarity 120A opposite strand [Source:HGNC Symbol;Acc:HGNC:23389]
ENSG00000175567	2089.97	-0.298292	0.0372378	-8.01046	1.14276e-15	9.21627e-15	0.000877331	2333	1970.5	ENSG00000175567	UCP2	uncoupling protein 2 [Source:HGNC Symbol;Acc:HGNC:12518]
ENSG00000173540	1147.78	0.538035	0.0671851	8.00825	1.16355e-15	9.37847e-15	0.00330692	862	1298.83	ENSG00000173540	GMPPB	GDP-mannose pyrophosphorylase B [Source:HGNC Symbol;Acc:HGNC:22932]
ENSG00000111364	2117.36	0.367016	0.0458472	8.00521	1.19261e-15	9.60717e-15	0.0014917	1734.33	2324	ENSG00000111364	DDX55	DEAD-box helicase 55 [Source:HGNC Symbol;Acc:HGNC:20085]
ENSG00000136878	573.882	-0.577915	0.0722332	-8.00068	1.23735e-15	9.96175e-15	0.0034196	718.667	500.5	ENSG00000136878	USP20	ubiquitin specific peptidase 20 [Source:HGNC Symbol;Acc:HGNC:12619]
ENSG00000124422	18636	0.251154	0.0313931	8.00029	1.24127e-15	9.98755e-15	0.000889033	16178.7	19976.3	ENSG00000124422	USP22	ubiquitin specific peptidase 22 [Source:HGNC Symbol;Acc:HGNC:12621]
ENSG00000119950	1034.83	-0.812482	0.101589	-7.99772	1.26747e-15	1.01924e-14	0.00904912	1420.67	839.333	ENSG00000119950	MXI1	MAX interactor 1, dimerization protein [Source:HGNC Symbol;Acc:HGNC:7534]
ENSG00000105516	70.9066	-1.30547	0.163231	-7.99765	1.26819e-15	1.01924e-14	0.0128996	115	48.3333	ENSG00000105516	DBP	D-box binding PAR bZIP transcription factor [Source:HGNC Symbol;Acc:HGNC:2697]
ENSG00000179091	5624.96	0.319348	0.039934	7.9969	1.27592e-15	1.02486e-14	0.00133645	4722.67	6114.83	ENSG00000179091	CYC1	cytochrome c1 [Source:HGNC Symbol;Acc:HGNC:2579]
ENSG00000205744	86.5237	-1.50912	0.188729	-7.99622	1.28296e-15	1.02992e-14	0.0236111	148.667	54.3333	ENSG00000205744	DENND1C	DENN domain containing 1C [Source:HGNC Symbol;Acc:HGNC:26225]
ENSG00000123130	4543.89	0.242455	0.0303219	7.99603	1.28495e-15	1.03092e-14	0.000646391	3958.33	4864.5	ENSG00000123130	ACOT9	acyl-CoA thioesterase 9 [Source:HGNC Symbol;Acc:HGNC:17152]
ENSG00000109323	383.717	-0.690164	0.0863247	-7.99498	1.296e-15	1.03919e-14	0.00480093	502.333	323	ENSG00000109323	MANBA	mannosidase beta [Source:HGNC Symbol;Acc:HGNC:6831]
ENSG00000103037	442.996	0.650709	0.0813952	7.99444	1.30166e-15	1.04313e-14	0.00358774	313.333	511.167	ENSG00000103037	SETD6	SET domain containing 6 [Source:HGNC Symbol;Acc:HGNC:26116]
ENSG00000084463	5088.83	0.352349	0.0440764	7.99405	1.30575e-15	1.0458e-14	0.00164801	4202.67	5566.67	ENSG00000084463	WBP11	WW domain binding protein 11 [Source:HGNC Symbol;Acc:HGNC:16461]
ENSG00000166197	14650.7	0.512634	0.0641339	7.99319	1.31492e-15	1.05254e-14	0.00387232	11146	16526.7	ENSG00000166197	NOLC1	nucleolar and coiled-body phosphoprotein 1 [Source:HGNC Symbol;Acc:HGNC:15608]
ENSG00000121753	405.426	-0.660541	0.0826443	-7.99257	1.32155e-15	1.05724e-14	0.00432431	524.667	344.5	ENSG00000121753	ADGRB2	adhesion G protein-coupled receptor B2 [Source:HGNC Symbol;Acc:HGNC:944]
ENSG00000020256	1119.63	-0.412565	0.0516199	-7.99236	1.3238e-15	1.05843e-14	0.00172634	1312.67	1024.17	ENSG00000020256	ZFP64	ZFP64 zinc finger protein [Source:HGNC Symbol;Acc:HGNC:15940]
ENSG00000124222	2595.62	-0.416504	0.0521221	-7.99093	1.33922e-15	1.07015e-14	0.00225078	3044	2370.67	ENSG00000124222	STX16	syntaxin 16 [Source:HGNC Symbol;Acc:HGNC:11431]
ENSG00000185163	782.095	0.599922	0.0751157	7.98663	1.38672e-15	1.10747e-14	0.00387682	568.333	895.833	ENSG00000185163	DDX51	DEAD-box helicase 51 [Source:HGNC Symbol;Acc:HGNC:20082]
ENSG00000250510	119.267	-1.02952	0.128918	-7.98586	1.39544e-15	1.11379e-14	0.00848322	176.667	89.8333	ENSG00000250510	GPR162	G protein-coupled receptor 162 [Source:HGNC Symbol;Acc:HGNC:16693]
ENSG00000163644	1287.81	-0.550524	0.0689631	-7.98288	1.42959e-15	1.14032e-14	0.00385738	1595	1132.17	ENSG00000163644	PPM1K	protein phosphatase, Mg2+/Mn2+ dependent 1K [Source:HGNC Symbol;Acc:HGNC:25415]
ENSG00000132182	7926.72	-0.377482	0.0472869	-7.98282	1.43032e-15	1.14032e-14	0.00203015	9160.67	7321.5	ENSG00000132182	NUP210	nucleoporin 210 [Source:HGNC Symbol;Acc:HGNC:30052]
ENSG00000185024	984.643	0.435215	0.0545616	7.97659	1.5043e-15	1.19862e-14	0.00170022	779.667	1094.33	ENSG00000185024	BRF1	BRF1, RNA polymerase III transcription initiation factor subunit [Source:HGNC Symbol;Acc:HGNC:11551]
ENSG00000133835	3296	-0.335596	0.0420743	-7.97626	1.5083e-15	1.20112e-14	0.00141422	3740.67	3076.83	ENSG00000133835	HSD17B4	hydroxysteroid 17-beta dehydrogenase 4 [Source:HGNC Symbol;Acc:HGNC:5213]
ENSG00000179111	64.5944	-1.61291	0.202259	-7.97449	1.53015e-15	1.21782e-14	0.0249007	114.333	38.8333	ENSG00000179111	HES7	hes family bHLH transcription factor 7 [Source:HGNC Symbol;Acc:HGNC:15977]
ENSG00000104774	1717.53	-0.458818	0.057555	-7.97182	1.56352e-15	1.24367e-14	0.00264273	2053.33	1550.67	ENSG00000104774	MAN2B1	mannosidase alpha class 2B member 1 [Source:HGNC Symbol;Acc:HGNC:6826]
ENSG00000278705	7318.61	0.551258	0.0691527	7.9716	1.56632e-15	1.24519e-14	0.00443279	5461.67	8308.5	ENSG00000278705	HIST1H4B	histone cluster 1 H4 family member b [Source:HGNC Symbol;Acc:HGNC:4789]
ENSG00000145439	698.492	-0.49564	0.0621846	-7.97045	1.58093e-15	1.25608e-14	0.00239347	847	623.667	ENSG00000145439	CBR4	carbonyl reductase 4 [Source:HGNC Symbol;Acc:HGNC:25891]
ENSG00000136932	350.923	0.663497	0.083279	7.96715	1.62372e-15	1.28934e-14	0.00314208	247	406	ENSG00000136932	TRMO	tRNA methyltransferase O [Source:HGNC Symbol;Acc:HGNC:30967]
ENSG00000125871	2379	0.351152	0.0440768	7.96682	1.62812e-15	1.2921e-14	0.00139902	1963.67	2600.67	ENSG00000125871	MGME1	mitochondrial genome maintenance exonuclease 1 [Source:HGNC Symbol;Acc:HGNC:16205]
ENSG00000147905	1115.89	-0.399801	0.0501852	-7.9665	1.63226e-15	1.29465e-14	0.00158158	1300.67	1024.33	ENSG00000147905	ZCCHC7	zinc finger CCHC-type containing 7 [Source:HGNC Symbol;Acc:HGNC:26209]
ENSG00000214530	758.146	-0.501037	0.0629129	-7.96397	1.66604e-15	1.32069e-14	0.00258606	922.333	676	ENSG00000214530	STARD10	StAR related lipid transfer domain containing 10 [Source:HGNC Symbol;Acc:HGNC:10666]
ENSG00000088256	4303.24	0.501128	0.0629373	7.96234	1.68814e-15	1.33744e-14	0.00353482	3300.67	4839.5	ENSG00000088256	GNA11	G protein subunit alpha 11 [Source:HGNC Symbol;Acc:HGNC:4379]
ENSG00000142765	284.528	-1.15063	0.144676	-7.95314	1.81841e-15	1.43983e-14	0.0169674	436.667	205.333	ENSG00000142765	SYTL1	synaptotagmin like 1 [Source:HGNC Symbol;Acc:HGNC:15584]
ENSG00000166326	9159.34	-0.222729	0.0280096	-7.95189	1.83692e-15	1.45367e-14	0.000648585	9900	8809	ENSG00000166326	TRIM44	tripartite motif containing 44 [Source:HGNC Symbol;Acc:HGNC:19016]
ENSG00000115267	306.641	-0.717018	0.0901885	-7.95021	1.86193e-15	1.47262e-14	0.00486916	405.333	256	ENSG00000115267	IFIH1	interferon induced with helicase C domain 1 [Source:HGNC Symbol;Acc:HGNC:18873]
ENSG00000127418	1637.33	-0.476031	0.0598823	-7.94945	1.87348e-15	1.48091e-14	0.00288012	1970.33	1470.33	ENSG00000127418	FGFRL1	fibroblast growth factor receptor like 1 [Source:HGNC Symbol;Acc:HGNC:3693]
ENSG00000105671	1315.34	0.605449	0.0761696	7.94871	1.88471e-15	1.48894e-14	0.00465454	955.333	1507.83	ENSG00000105671	DDX49	DEAD-box helicase 49 [Source:HGNC Symbol;Acc:HGNC:18684]
ENSG00000198862	1980.52	-0.428657	0.0539292	-7.94852	1.88755e-15	1.49034e-14	0.00232404	2334.67	1803	ENSG00000198862	LTN1	listerin E3 ubiquitin protein ligase 1 [Source:HGNC Symbol;Acc:HGNC:13082]
ENSG00000131941	927.657	0.549668	0.0691756	7.94598	1.92656e-15	1.52028e-14	0.00331843	693.333	1052.83	ENSG00000131941	RHPN2	rhophilin Rho GTPase binding protein 2 [Source:HGNC Symbol;Acc:HGNC:19974]
ENSG00000157823	850.404	-0.468896	0.0590265	-7.94382	1.96049e-15	1.54618e-14	0.0022584	1021	765.833	ENSG00000157823	AP3S2	adaptor related protein complex 3 subunit sigma 2 [Source:HGNC Symbol;Acc:HGNC:571]
ENSG00000128165	217.168	-1.72603	0.217437	-7.93807	2.05355e-15	1.61865e-14	0.0410735	397.667	125	ENSG00000128165	ADM2	adrenomedullin 2 [Source:HGNC Symbol;Acc:HGNC:28898]
ENSG00000172164	455.817	-0.71296	0.0898266	-7.93707	2.07006e-15	1.63075e-14	0.00577161	603	381.833	ENSG00000172164	SNTB1	syntrophin beta 1 [Source:HGNC Symbol;Acc:HGNC:11168]
ENSG00000204054	414.908	-0.719994	0.0907709	-7.93199	2.15654e-15	1.69791e-14	0.00574005	548.667	346.333	ENSG00000204054	LINC00963	long intergenic non-protein coding RNA 963 [Source:HGNC Symbol;Acc:HGNC:48716]
ENSG00000148688	2095.56	0.438626	0.0553131	7.92988	2.19364e-15	1.72614e-14	0.00239399	1656.67	2330	ENSG00000148688	RPP30	ribonuclease P/MRP subunit p30 [Source:HGNC Symbol;Acc:HGNC:17688]
ENSG00000080561	255.565	-0.774287	0.0976535	-7.92892	2.21064e-15	1.73854e-14	0.00564211	345.333	209.667	ENSG00000080561	MID2	midline 2 [Source:HGNC Symbol;Acc:HGNC:7096]
ENSG00000058085	4365.55	-0.643488	0.0811624	-7.9284	2.21986e-15	1.7448e-14	0.00612158	5620	3734.67	ENSG00000058085	LAMC2	laminin subunit gamma 2 [Source:HGNC Symbol;Acc:HGNC:6493]
ENSG00000175606	763.621	0.489983	0.0618549	7.92149	2.3469e-15	1.84362e-14	0.00215316	588.333	857.333	ENSG00000175606	TMEM70	transmembrane protein 70 [Source:HGNC Symbol;Acc:HGNC:26050]
ENSG00000063245	5662.64	0.329284	0.0415716	7.92088	2.3584e-15	1.85071e-14	0.00146543	4734.67	6168.83	ENSG00000063245	EPN1	epsin 1 [Source:HGNC Symbol;Acc:HGNC:21604]
ENSG00000135932	3845.53	-0.272301	0.0343777	-7.92087	2.35859e-15	1.85071e-14	0.000887144	4248.67	3650.33	ENSG00000135932	CAB39	calcium binding protein 39 [Source:HGNC Symbol;Acc:HGNC:20292]
ENSG00000162222	929.3	-0.468127	0.0591158	-7.91881	2.39785e-15	1.88046e-14	0.0023605	1114	836	ENSG00000162222	TTC9C	tetratricopeptide repeat domain 9C [Source:HGNC Symbol;Acc:HGNC:28432]
ENSG00000144909	1383.77	0.443876	0.0560719	7.91619	2.44894e-15	1.91944e-14	0.00219291	1090.67	1539.17	ENSG00000144909	OSBPL11	oxysterol binding protein like 11 [Source:HGNC Symbol;Acc:HGNC:16397]
ENSG00000278828	5477.66	0.471394	0.0595602	7.91458	2.48081e-15	1.94333e-14	0.00319761	4262	6130.83	ENSG00000278828	HIST1H3H	histone cluster 1 H3 family member h [Source:HGNC Symbol;Acc:HGNC:4775]
ENSG00000105227	245.9	-0.983824	0.124387	-7.90936	2.5872e-15	2.02552e-14	0.0112351	359	188.167	ENSG00000105227	PRX	periaxin [Source:HGNC Symbol;Acc:HGNC:13797]
ENSG00000137776	4693.22	0.295744	0.0373974	7.90815	2.61252e-15	2.0442e-14	0.00111073	3986.33	5077.17	ENSG00000137776	SLTM	SAFB like transcription modulator [Source:HGNC Symbol;Acc:HGNC:20709]
ENSG00000204469	32263.9	0.27967	0.0353816	7.90437	2.69292e-15	2.10592e-14	0.00116916	27615	34803.2	ENSG00000204469	PRRC2A	proline rich coiled-coil 2A [Source:HGNC Symbol;Acc:HGNC:13918]
ENSG00000006468	2467.92	-0.440173	0.0556983	-7.90282	2.72671e-15	2.13063e-14	0.00260398	2929.67	2239.33	ENSG00000006468	ETV1	ETS variant 1 [Source:HGNC Symbol;Acc:HGNC:3490]
ENSG00000116852	988.997	-1.08391	0.137156	-7.90278	2.72758e-15	2.13063e-14	0.017173	1493	732	ENSG00000116852	KIF21B	kinesin family member 21B [Source:HGNC Symbol;Acc:HGNC:29442]
ENSG00000100523	2436.01	-0.412639	0.052236	-7.8995	2.80015e-15	2.18609e-14	0.00223847	2854.67	2229.5	ENSG00000100523	DDHD1	DDHD domain containing 1 [Source:HGNC Symbol;Acc:HGNC:19714]
ENSG00000221869	234.55	-1.15364	0.146043	-7.8993	2.80465e-15	2.18838e-14	0.01668	362.333	169	ENSG00000221869	CEBPD	CCAAT enhancer binding protein delta [Source:HGNC Symbol;Acc:HGNC:1835]
ENSG00000160194	1722.35	0.36804	0.046594	7.89888	2.81416e-15	2.19457e-14	0.00143671	1410.33	1890	ENSG00000160194	NDUFV3	NADH:ubiquinone oxidoreductase subunit V3 [Source:HGNC Symbol;Acc:HGNC:7719]
ENSG00000154217	1279.36	-0.839904	0.106338	-7.89846	2.82367e-15	2.20076e-14	0.0101646	1776	1028.67	ENSG00000154217	PITPNC1	phosphatidylinositol transfer protein cytoplasmic 1 [Source:HGNC Symbol;Acc:HGNC:21045]
ENSG00000169855	3056.41	-0.344354	0.0435998	-7.89807	2.83247e-15	2.20638e-14	0.00151775	3483	2845.33	ENSG00000169855	ROBO1	roundabout guidance receptor 1 [Source:HGNC Symbol;Acc:HGNC:10249]
ENSG00000174721	392.51	-0.693168	0.087771	-7.89746	2.84653e-15	2.21609e-14	0.00509716	514.333	330.667	ENSG00000174721	FGFBP3	fibroblast growth factor binding protein 3 [Source:HGNC Symbol;Acc:HGNC:23428]
ENSG00000162065	1073.1	0.525136	0.0664999	7.89679	2.8617e-15	2.22665e-14	0.00315219	811.667	1212.33	ENSG00000162065	TBC1D24	TBC1 domain family member 24 [Source:HGNC Symbol;Acc:HGNC:29203]
ENSG00000135476	3232.47	0.519916	0.0658518	7.89525	2.89741e-15	2.25318e-14	0.00380329	2451.67	3648.67	ENSG00000135476	ESPL1	extra spindle pole bodies like 1, separase [Source:HGNC Symbol;Acc:HGNC:16856]
ENSG00000182010	581.814	0.786282	0.0995905	7.89516	2.89946e-15	2.25351e-14	0.00730549	384	686.833	ENSG00000182010	RTKN2	rhotekin 2 [Source:HGNC Symbol;Acc:HGNC:19364]
ENSG00000100600	2442.44	-0.494098	0.062586	-7.89471	2.90992e-15	2.26038e-14	0.0033856	2963	2182.5	ENSG00000100600	LGMN	legumain [Source:HGNC Symbol;Acc:HGNC:9472]
ENSG00000138439	385.882	-0.618428	0.0783722	-7.89091	2.99991e-15	2.32899e-14	0.00354159	491.333	332.5	ENSG00000138439	FAM117B	family with sequence similarity 117 member B [Source:HGNC Symbol;Acc:HGNC:14440]
ENSG00000166847	4190.67	0.316496	0.0401272	7.8873	3.08794e-15	2.39599e-14	0.00128449	3523.33	4551.83	ENSG00000166847	DCTN5	dynactin subunit 5 [Source:HGNC Symbol;Acc:HGNC:24594]
ENSG00000196453	967.05	0.472802	0.0599578	7.88558	3.13068e-15	2.4278e-14	0.00225839	751.667	1082.67	ENSG00000196453	ZNF777	zinc finger protein 777 [Source:HGNC Symbol;Acc:HGNC:22213]
ENSG00000065135	10250.9	0.241275	0.0306002	7.88474	3.15193e-15	2.44292e-14	0.000794692	8939	10968.3	ENSG00000065135	GNAI3	G protein subunit alpha i3 [Source:HGNC Symbol;Acc:HGNC:4387]
ENSG00000060688	3062.99	0.314634	0.0399067	7.88424	3.1646e-15	2.45137e-14	0.00117102	2576.33	3326.33	ENSG00000060688	SNRNP40	small nuclear ribonucleoprotein U5 subunit 40 [Source:HGNC Symbol;Acc:HGNC:30857]
ENSG00000012983	6770.68	-0.209393	0.0265748	-7.87939	3.28989e-15	2.54701e-14	0.000535837	7274.67	6533.83	ENSG00000012983	MAP4K5	mitogen-activated protein kinase kinase kinase kinase 5 [Source:HGNC Symbol;Acc:HGNC:6867]
ENSG00000105419	71.5593	-1.4145	0.179531	-7.87887	3.30348e-15	2.55611e-14	0.0182667	120	46.6667	ENSG00000105419	MEIS3	Meis homeobox 3 [Source:HGNC Symbol;Acc:HGNC:29537]
ENSG00000113916	825.799	-0.492718	0.0625453	-7.87779	3.33228e-15	2.57696e-14	0.00264006	1000.33	737.833	ENSG00000113916	BCL6	B cell CLL/lymphoma 6 [Source:HGNC Symbol;Acc:HGNC:1001]
ENSG00000073331	232.044	-0.983373	0.124842	-7.87694	3.35503e-15	2.59311e-14	0.0111283	338.333	178	ENSG00000073331	ALPK1	alpha kinase 1 [Source:HGNC Symbol;Acc:HGNC:20917]
ENSG00000167703	436.936	-0.739676	0.0939413	-7.87381	3.43991e-15	2.65724e-14	0.00641676	584.667	363	ENSG00000167703	SLC43A2	solute carrier family 43 member 2 [Source:HGNC Symbol;Acc:HGNC:23087]
ENSG00000116667	907.257	-0.410085	0.0520844	-7.87347	3.44934e-15	2.66305e-14	0.00157717	1063	830.5	ENSG00000116667	C1orf21	chromosome 1 open reading frame 21 [Source:HGNC Symbol;Acc:HGNC:15494]
ENSG00000117592	4843.18	0.287388	0.0365137	7.87067	3.52736e-15	2.72178e-14	0.00105573	4128.33	5228.83	ENSG00000117592	PRDX6	peroxiredoxin 6 [Source:HGNC Symbol;Acc:HGNC:16753]
ENSG00000136492	2578.57	0.690784	0.0877962	7.86803	3.6026e-15	2.77829e-14	0.00692247	1789.33	2998.5	ENSG00000136492	BRIP1	BRCA1 interacting protein C-terminal helicase 1 [Source:HGNC Symbol;Acc:HGNC:20473]
ENSG00000132600	1201.1	0.469328	0.0596674	7.86573	3.66939e-15	2.82824e-14	0.00245904	934.667	1343.83	ENSG00000132600	PRMT7	protein arginine methyltransferase 7 [Source:HGNC Symbol;Acc:HGNC:25557]
ENSG00000108861	3156.92	0.41351	0.0525722	7.86557	3.67428e-15	2.83044e-14	0.0022963	2528	3493	ENSG00000108861	DUSP3	dual specificity phosphatase 3 [Source:HGNC Symbol;Acc:HGNC:3069]
ENSG00000149970	384.099	0.653509	0.0830894	7.86513	3.68717e-15	2.83879e-14	0.00342834	272	443.833	ENSG00000149970	CNKSR2	connector enhancer of kinase suppressor of Ras 2 [Source:HGNC Symbol;Acc:HGNC:19701]
ENSG00000103549	2514.19	0.406343	0.0516863	7.86172	3.789e-15	2.91558e-14	0.00211671	2022	2778.33	ENSG00000103549	RNF40	ring finger protein 40 [Source:HGNC Symbol;Acc:HGNC:16867]
ENSG00000100311	701.997	-0.943629	0.120079	-7.85843	3.88993e-15	2.99159e-14	0.012582	1010.67	545.667	ENSG00000100311	PDGFB	platelet derived growth factor subunit B [Source:HGNC Symbol;Acc:HGNC:8800]
ENSG00000162729	817.198	-0.485631	0.0618309	-7.85417	4.02426e-15	3.09319e-14	0.00254205	987.333	732	ENSG00000162729	IGSF8	immunoglobulin superfamily member 8 [Source:HGNC Symbol;Acc:HGNC:17813]
ENSG00000142619	17.3859	-2.92982	0.373052	-7.85366	4.0408e-15	3.10419e-14	0.0565961	40.3333	5.5	ENSG00000142619	PADI3	peptidyl arginine deiminase 3 [Source:HGNC Symbol;Acc:HGNC:18337]
ENSG00000143294	2191.13	0.386851	0.0492665	7.85222	4.08738e-15	3.13824e-14	0.00181886	1779.67	2414.83	ENSG00000143294	PRCC	proline rich mitotic checkpoint control factor [Source:HGNC Symbol;Acc:HGNC:9343]
ENSG00000144366	1301.64	-0.386723	0.0492954	-7.84502	4.329e-15	3.32192e-14	0.00161479	1510	1199	ENSG00000144366	GULP1	GULP PTB domain containing engulfment adaptor 1 [Source:HGNC Symbol;Acc:HGNC:18649]
ENSG00000168803	547.596	0.656379	0.0836703	7.84484	4.33522e-15	3.32486e-14	0.00447505	386.333	632.833	ENSG00000168803	ADAL	adenosine deaminase like [Source:HGNC Symbol;Acc:HGNC:31853]
ENSG00000130158	995.155	-0.736115	0.0938471	-7.84377	4.3722e-15	3.35138e-14	0.00755635	1324	827.5	ENSG00000130158	DOCK6	dedicator of cytokinesis 6 [Source:HGNC Symbol;Acc:HGNC:19189]
ENSG00000039650	1161.06	0.382142	0.0487231	7.84313	4.39463e-15	3.36672e-14	0.0013138	944.333	1278.33	ENSG00000039650	PNKP	polynucleotide kinase 3'-phosphatase [Source:HGNC Symbol;Acc:HGNC:9154]
ENSG00000129317	1888.4	0.462636	0.0590268	7.83773	4.58757e-15	3.51259e-14	0.00273733	1473.33	2109.83	ENSG00000129317	PUS7L	pseudouridine synthase 7 like [Source:HGNC Symbol;Acc:HGNC:25276]
ENSG00000102038	3225.45	-0.306659	0.0391315	-7.83661	4.62855e-15	3.54203e-14	0.0011769	3616	3033	ENSG00000102038	SMARCA1	SWI/SNF related, matrix associated, actin dependent regulator of chromatin, subfamily a, member 1 [Source:HGNC Symbol;Acc:HGNC:11097]
ENSG00000143942	343.9	0.707145	0.0903489	7.82683	5.00309e-15	3.82654e-14	0.00419168	236.667	400.833	ENSG00000143942	CHAC2	ChaC cation transport regulator homolog 2 [Source:HGNC Symbol;Acc:HGNC:32363]
ENSG00000183647	289.98	0.87117	0.111327	7.8253	5.06435e-15	3.86974e-14	0.00729383	182.667	346.667	ENSG00000183647	ZNF530	zinc finger protein 530 [Source:HGNC Symbol;Acc:HGNC:29297]
ENSG00000115468	176.068	-1.00512	0.128445	-7.82528	5.06513e-15	3.86974e-14	0.010783	258.667	134	ENSG00000115468	EFHD1	EF-hand domain family member D1 [Source:HGNC Symbol;Acc:HGNC:29556]
ENSG00000014914	992.53	-0.518924	0.0663297	-7.8234	5.1417e-15	3.92608e-14	0.00329958	1212.67	880.667	ENSG00000014914	MTMR11	myotubularin related protein 11 [Source:HGNC Symbol;Acc:HGNC:24307]
ENSG00000153207	6099.69	0.237402	0.0303611	7.81926	5.31329e-15	4.05488e-14	0.000709393	5327.67	6523.33	ENSG00000153207	AHCTF1	AT-hook containing transcription factor 1 [Source:HGNC Symbol;Acc:HGNC:24618]
ENSG00000046604	8527.99	-0.21982	0.0281175	-7.81792	5.37033e-15	4.09616e-14	0.000646549	9207.67	8205.5	ENSG00000046604	DSG2	desmoglein 2 [Source:HGNC Symbol;Acc:HGNC:3049]
ENSG00000136717	1419.59	-0.336877	0.0431123	-7.81395	5.54231e-15	4.22503e-14	0.00112044	1612.33	1325.33	ENSG00000136717	BIN1	bridging integrator 1 [Source:HGNC Symbol;Acc:HGNC:1052]
ENSG00000197728	3182.37	0.324234	0.0414975	7.81332	5.56999e-15	4.24381e-14	0.00130797	2665	3465.33	ENSG00000197728	RPS26	ribosomal protein S26 [Source:HGNC Symbol;Acc:HGNC:10414]
ENSG00000182054	1426.94	-0.642533	0.0822382	-7.81308	5.58089e-15	4.24978e-14	0.00586168	1835.33	1221.33	ENSG00000182054	IDH2	isocitrate dehydrogenase (NADP(+)) 2, mitochondrial [Source:HGNC Symbol;Acc:HGNC:5383]
ENSG00000215788	99.214	-1.37403	0.175921	-7.81051	5.69563e-15	4.33478e-14	0.0206051	163.667	65.8333	ENSG00000215788	TNFRSF25	TNF receptor superfamily member 25 [Source:HGNC Symbol;Acc:HGNC:11910]
ENSG00000100014	1559.02	0.459725	0.0588629	7.81009	5.71463e-15	4.34687e-14	0.00259054	1220	1740.33	ENSG00000100014	SPECC1L	sperm antigen with calponin homology and coiled-coil domains 1 like [Source:HGNC Symbol;Acc:HGNC:29022]
ENSG00000204923	350.963	-0.662202	0.0847926	-7.80966	5.73415e-15	4.35933e-14	0.00432367	454.667	298.333	ENSG00000204923	FBXO48	F-box protein 48 [Source:HGNC Symbol;Acc:HGNC:33857]
ENSG00000137841	955.896	-0.490802	0.0628475	-7.80941	5.74553e-15	4.3656e-14	0.00282839	1155	854.833	ENSG00000137841	PLCB2	phospholipase C beta 2 [Source:HGNC Symbol;Acc:HGNC:9055]
ENSG00000171792	1668.97	0.362383	0.0464149	7.80747	5.83467e-15	4.43091e-14	0.00140119	1371.67	1829.67	ENSG00000171792	RHNO1	RAD9-HUS1-RAD1 interacting nuclear orphan 1 [Source:HGNC Symbol;Acc:HGNC:28206]
ENSG00000178607	943.943	-1.02558	0.13138	-7.80618	5.89497e-15	4.47426e-14	0.0156399	1396	713	ENSG00000178607	ERN1	endoplasmic reticulum to nucleus signaling 1 [Source:HGNC Symbol;Acc:HGNC:3449]
ENSG00000214022	4385.52	0.371705	0.0476225	7.80525	5.93826e-15	4.50467e-14	0.00192385	3584.67	4815.33	ENSG00000214022	REPIN1	replication initiator 1 [Source:HGNC Symbol;Acc:HGNC:17922]
ENSG00000180596	9163	0.534025	0.0684612	7.8004	6.17133e-15	4.67892e-14	0.0043748	6904	10367.3	ENSG00000180596	HIST1H2BC	histone cluster 1 H2B family member c [Source:HGNC Symbol;Acc:HGNC:4757]
ENSG00000105048	1911.42	-0.347414	0.0445524	-7.79788	6.29551e-15	4.77047e-14	0.00141374	2180.33	1778.83	ENSG00000105048	TNNT1	troponin T1, slow skeletal type [Source:HGNC Symbol;Acc:HGNC:11948]
ENSG00000169180	6545.95	0.368913	0.0473148	7.797	6.33963e-15	4.80129e-14	0.00198022	5358.33	7184.33	ENSG00000169180	XPO6	exportin 6 [Source:HGNC Symbol;Acc:HGNC:19733]
ENSG00000169188	1215.32	0.484837	0.0621954	7.79539	6.42079e-15	4.86011e-14	0.00276131	938	1363.17	ENSG00000169188	APEX2	apurinic/apyrimidinic endodeoxyribonuclease 2 [Source:HGNC Symbol;Acc:HGNC:17889]
ENSG00000101400	567.003	-0.507045	0.0650684	-7.79249	6.57022e-15	4.96895e-14	0.00244193	691.333	504.5	ENSG00000101400	SNTA1	syntrophin alpha 1 [Source:HGNC Symbol;Acc:HGNC:11167]
ENSG00000111642	14522.8	0.219731	0.0281979	7.79246	6.57172e-15	4.96895e-14	0.000690322	12804	15472.5	ENSG00000111642	CHD4	chromodomain helicase DNA binding protein 4 [Source:HGNC Symbol;Acc:HGNC:1919]
ENSG00000075089	732.763	-0.53555	0.068771	-7.78744	6.83809e-15	5.16755e-14	0.0032904	903.333	647.333	ENSG00000075089	ACTR6	ARP6 actin related protein 6 homolog [Source:HGNC Symbol;Acc:HGNC:24025]
ENSG00000166401	601.33	0.670423	0.0860939	7.78711	6.85575e-15	5.17808e-14	0.00506179	422.333	697	ENSG00000166401	SERPINB8	serpin family B member 8 [Source:HGNC Symbol;Acc:HGNC:8952]
ENSG00000136950	1623.53	0.351687	0.045178	7.78447	7.00056e-15	5.28459e-14	0.00127585	1340.67	1776.17	ENSG00000136950	ARPC5L	actin related protein 2/3 complex subunit 5 like [Source:HGNC Symbol;Acc:HGNC:23366]
ENSG00000259956	4846.35	0.426821	0.0548309	7.78432	7.00874e-15	5.2879e-14	0.00265371	3859.33	5375.17	ENSG00000259956	RBM15B	RNA binding motif protein 15B [Source:HGNC Symbol;Acc:HGNC:24303]
ENSG00000101152	8456	0.293452	0.0377015	7.78358	7.05018e-15	5.31628e-14	0.0012365	7192.67	9144.17	ENSG00000101152	DNAJC5	DnaJ heat shock protein family (Hsp40) member C5 [Source:HGNC Symbol;Acc:HGNC:16235]
ENSG00000165724	986.456	0.546903	0.0702837	7.78136	7.17496e-15	5.40744e-14	0.00354431	737.333	1119.67	ENSG00000165724	ZMYND19	zinc finger MYND-type containing 19 [Source:HGNC Symbol;Acc:HGNC:21146]
ENSG00000132383	8169.13	0.418646	0.0538023	7.78119	7.18465e-15	5.41181e-14	0.00264236	6527.33	9047.33	ENSG00000132383	RPA1	replication protein A1 [Source:HGNC Symbol;Acc:HGNC:10289]
ENSG00000165113	306.26	-0.755101	0.0970433	-7.78107	7.19157e-15	5.4141e-14	0.00610811	411.333	253	ENSG00000165113	GKAP1	G kinase anchoring protein 1 [Source:HGNC Symbol;Acc:HGNC:17496]
ENSG00000075975	2397.12	0.364791	0.0468877	7.7801	7.24662e-15	5.45259e-14	0.00164632	1965.33	2628.67	ENSG00000075975	MKRN2	makorin ring finger protein 2 [Source:HGNC Symbol;Acc:HGNC:7113]
ENSG00000147679	965.407	0.555608	0.0714192	7.77953	7.27951e-15	5.47438e-14	0.00366878	718.333	1096.17	ENSG00000147679	UTP23	UTP23, small subunit processome component [Source:HGNC Symbol;Acc:HGNC:28224]
ENSG00000167085	4633.3	0.334415	0.043015	7.77437	7.58264e-15	5.69926e-14	0.00153901	3862.33	5051.33	ENSG00000167085	PHB	prohibitin [Source:HGNC Symbol;Acc:HGNC:8912]
ENSG00000227038	158.483	-1.06785	0.137371	-7.77347	7.63619e-15	5.73641e-14	0.012499	237.667	118	ENSG00000227038	GTF2IP7	general transcription factor IIi pseudogene 7 [Source:HGNC Symbol;Acc:HGNC:51720]
ENSG00000176108	613.449	0.540318	0.0695096	7.77329	7.64706e-15	5.74148e-14	0.00271418	460.667	695.333	ENSG00000176108	CHMP6	charged multivesicular body protein 6 [Source:HGNC Symbol;Acc:HGNC:25675]
ENSG00000180353	374.043	-0.69663	0.0896359	-7.77177	7.73943e-15	5.8077e-14	0.00530155	491	314.5	ENSG00000180353	HCLS1	hematopoietic cell-specific Lyn substrate 1 [Source:HGNC Symbol;Acc:HGNC:4844]
ENSG00000126953	397.846	0.697917	0.0898287	7.76942	7.88486e-15	5.91365e-14	0.00460743	275.333	462.833	ENSG00000126953	TIMM8A	translocase of inner mitochondrial membrane 8A [Source:HGNC Symbol;Acc:HGNC:11817]
ENSG00000261373	185.02	1.12784	0.145169	7.76915	7.90145e-15	5.9229e-14	0.0121978	101.333	229.5	ENSG00000261373	VPS9D1-AS1	VPS9D1 antisense RNA 1 [Source:HGNC Symbol;Acc:HGNC:48915]
ENSG00000173334	1489.32	-0.529388	0.0681444	-7.76862	7.93451e-15	5.94448e-14	0.00384449	1835	1316.67	ENSG00000173334	TRIB1	tribbles pseudokinase 1 [Source:HGNC Symbol;Acc:HGNC:16891]
ENSG00000235884	618.734	0.552393	0.0711077	7.7684	7.9483e-15	5.95161e-14	0.00293874	461.667	703.167	ENSG00000235884	LINC00941	long intergenic non-protein coding RNA 941 [Source:HGNC Symbol;Acc:HGNC:48635]
ENSG00000105429	1041.9	-0.5649	0.0727264	-7.76746	8.00726e-15	5.99253e-14	0.00420316	1301.67	912.167	ENSG00000105429	MEGF8	multiple EGF like domains 8 [Source:HGNC Symbol;Acc:HGNC:3233]
ENSG00000170471	6461.39	-0.298316	0.0384238	-7.76384	8.23973e-15	6.16319e-14	0.00127144	7215	6095.17	ENSG00000170471	RALGAPB	Ral GTPase activating protein non-catalytic beta subunit [Source:HGNC Symbol;Acc:HGNC:29221]
ENSG00000151474	2256.82	-0.476865	0.0614485	-7.7604	8.4659e-15	6.32897e-14	0.00321797	2713	2026.17	ENSG00000151474	FRMD4A	FERM domain containing 4A [Source:HGNC Symbol;Acc:HGNC:25491]
ENSG00000162650	486.253	0.71144	0.0916775	7.76025	8.47597e-15	6.33309e-14	0.00548878	333.667	567.5	ENSG00000162650	ATXN7L2	ataxin 7 like 2 [Source:HGNC Symbol;Acc:HGNC:28713]
ENSG00000170275	10964.4	-0.280405	0.0361384	-7.75919	8.54705e-15	6.38278e-14	0.00116789	12152.7	10387.2	ENSG00000170275	CRTAP	cartilage associated protein [Source:HGNC Symbol;Acc:HGNC:2379]
ENSG00000170190	662.561	-0.808088	0.104168	-7.75751	8.66137e-15	6.46468e-14	0.00907127	907	538.5	ENSG00000170190	SLC16A5	solute carrier family 16 member 5 [Source:HGNC Symbol;Acc:HGNC:10926]
ENSG00000111786	4392.53	0.259089	0.0334025	7.75656	8.72649e-15	6.5098e-14	0.000825668	3798.33	4716.83	ENSG00000111786	SRSF9	serine and arginine rich splicing factor 9 [Source:HGNC Symbol;Acc:HGNC:10791]
ENSG00000174177	672.563	0.483957	0.0624034	7.75529	8.81393e-15	6.5715e-14	0.00201579	519.333	754.333	ENSG00000174177	CTU2	cytosolic thiouridylase subunit 2 [Source:HGNC Symbol;Acc:HGNC:28005]
ENSG00000181885	539.111	-1.61288	0.207985	-7.7548	8.84847e-15	6.59071e-14	0.0398409	955.667	325.667	ENSG00000181885	CLDN7	claudin 7 [Source:HGNC Symbol;Acc:HGNC:2049]
ENSG00000151247	2390.32	0.294332	0.0379549	7.75479	8.84917e-15	6.59071e-14	0.00092677	2030.67	2586.83	ENSG00000151247	EIF4E	eukaryotic translation initiation factor 4E [Source:HGNC Symbol;Acc:HGNC:3287]
ENSG00000088854	1315.68	-0.444882	0.0574116	-7.74899	9.26255e-15	6.89491e-14	0.00246045	1563	1191.67	ENSG00000088854	C20orf194	chromosome 20 open reading frame 194 [Source:HGNC Symbol;Acc:HGNC:17721]
ENSG00000175582	5352.82	-0.371153	0.0479005	-7.74841	9.30473e-15	6.9226e-14	0.00202913	6168.67	4950.83	ENSG00000175582	RAB6A	RAB6A, member RAS oncogene family [Source:HGNC Symbol;Acc:HGNC:9786]
ENSG00000196839	355.161	-0.855171	0.110382	-7.74738	9.38111e-15	6.9757e-14	0.0091849	494.333	284.333	ENSG00000196839	ADA	adenosine deaminase [Source:HGNC Symbol;Acc:HGNC:186]
ENSG00000183943	1132.29	-0.408236	0.0527435	-7.74003	9.93966e-15	7.38708e-14	0.00184769	1324.33	1036.67	ENSG00000183943	PRKX	protein kinase X-linked [Source:HGNC Symbol;Acc:HGNC:9441]
ENSG00000007047	657.374	-0.778349	0.100565	-7.73977	9.95975e-15	7.39806e-14	0.00834926	891	538.667	ENSG00000007047	MARK4	microtubule affinity regulating kinase 4 [Source:HGNC Symbol;Acc:HGNC:13538]
ENSG00000169220	381.435	-0.69458	0.0897448	-7.7395	9.98056e-15	7.40957e-14	0.00536742	500.667	321.167	ENSG00000169220	RGS14	regulator of G protein signaling 14 [Source:HGNC Symbol;Acc:HGNC:9996]
ENSG00000153107	3744.3	0.346947	0.0448308	7.73902	1.00184e-14	7.43371e-14	0.00163443	3101.67	4092.83	ENSG00000153107	ANAPC1	anaphase promoting complex subunit 1 [Source:HGNC Symbol;Acc:HGNC:19988]
ENSG00000184009	111055	0.403344	0.0521222	7.73843	1.00651e-14	7.46435e-14	0.00260033	89474	122656	ENSG00000184009	ACTG1	actin gamma 1 [Source:HGNC Symbol;Acc:HGNC:144]
ENSG00000188488	28.2347	-2.12948	0.275198	-7.738	1.00995e-14	7.48589e-14	0.0363424	57	13.5	ENSG00000188488	SERPINA5	serpin family A member 5 [Source:HGNC Symbol;Acc:HGNC:8723]
ENSG00000174165	447.441	-0.6376	0.0824041	-7.73748	1.01408e-14	7.51251e-14	0.00449293	574.333	383.333	ENSG00000174165	ZDHHC24	zinc finger DHHC-type containing 24 [Source:HGNC Symbol;Acc:HGNC:27387]
ENSG00000196517	303.093	-0.984787	0.12734	-7.73354	1.04594e-14	7.74443e-14	0.0126355	443	232.333	ENSG00000196517	SLC6A9	solute carrier family 6 member 9 [Source:HGNC Symbol;Acc:HGNC:11056]
ENSG00000029639	614.496	-0.507113	0.0655795	-7.73279	1.05213e-14	7.78606e-14	0.0026321	749	547.333	ENSG00000029639	TFB1M	transcription factor B1, mitochondrial [Source:HGNC Symbol;Acc:HGNC:17037]
ENSG00000134871	9246.27	-0.566983	0.0733616	-7.72861	1.08729e-14	8.04201e-14	0.00507245	11555.7	8093.5	ENSG00000134871	COL4A2	collagen type IV alpha 2 chain [Source:HGNC Symbol;Acc:HGNC:2203]
ENSG00000026297	670.26	-0.581056	0.0751879	-7.72806	1.09199e-14	8.07252e-14	0.00406813	842	584.333	ENSG00000026297	RNASET2	ribonuclease T2 [Source:HGNC Symbol;Acc:HGNC:21686]
ENSG00000183580	45.7147	3.90868	0.505967	7.72517	1.11703e-14	8.25321e-14	0.086654	4.33333	67.1667	ENSG00000183580	FBXL7	F-box and leucine rich repeat protein 7 [Source:HGNC Symbol;Acc:HGNC:13604]
ENSG00000182606	4923.41	-0.266067	0.0344584	-7.7214	1.1506e-14	8.4967e-14	0.000946671	5427.67	4681.83	ENSG00000182606	TRAK1	trafficking kinesin protein 1 [Source:HGNC Symbol;Acc:HGNC:29947]
ENSG00000187239	6250.84	0.343766	0.0445249	7.72077	1.15629e-14	8.53421e-14	0.00172733	5182	6828.17	ENSG00000187239	FNBP1	formin binding protein 1 [Source:HGNC Symbol;Acc:HGNC:17069]
ENSG00000107882	1338.28	-0.457159	0.0592162	-7.72016	1.1618e-14	8.57033e-14	0.00267596	1600.67	1209	ENSG00000107882	SUFU	SUFU negative regulator of hedgehog signaling [Source:HGNC Symbol;Acc:HGNC:16466]
ENSG00000056097	9486.53	0.233317	0.0302303	7.718	1.18166e-14	8.71227e-14	0.000764862	8309	10132	ENSG00000056097	ZFR	zinc finger RNA binding protein [Source:HGNC Symbol;Acc:HGNC:17277]
ENSG00000165914	1755.94	-0.342391	0.0443676	-7.71713	1.18978e-14	8.76746e-14	0.00135389	1999.67	1637	ENSG00000165914	TTC7B	tetratricopeptide repeat domain 7B [Source:HGNC Symbol;Acc:HGNC:19858]
ENSG00000138435	81.507	-1.48986	0.193061	-7.71703	1.19069e-14	8.7695e-14	0.0245822	140	51.6667	ENSG00000138435	CHRNA1	cholinergic receptor nicotinic alpha 1 subunit [Source:HGNC Symbol;Acc:HGNC:1955]
ENSG00000111424	816.725	0.549921	0.07128	7.71494	1.2104e-14	8.90995e-14	0.00342824	609.333	926.667	ENSG00000111424	VDR	vitamin D receptor [Source:HGNC Symbol;Acc:HGNC:12679]
ENSG00000100302	66.1394	-1.52676	0.197901	-7.71475	1.21224e-14	8.9188e-14	0.0237144	114.333	41.1667	ENSG00000100302	RASD2	RASD family member 2 [Source:HGNC Symbol;Acc:HGNC:18229]
ENSG00000188015	442.127	0.628361	0.0814595	7.71379	1.22138e-14	8.98129e-14	0.00361505	317	508	ENSG00000188015	S100A3	S100 calcium binding protein A3 [Source:HGNC Symbol;Acc:HGNC:10493]
ENSG00000143870	12584.7	-0.378493	0.0490697	-7.71337	1.22539e-14	9.00605e-14	0.00223909	14561	11610.7	ENSG00000143870	PDIA6	protein disulfide isomerase family A member 6 [Source:HGNC Symbol;Acc:HGNC:30168]
ENSG00000204789	101.939	-1.34049	0.173797	-7.71298	1.22914e-14	9.02886e-14	0.0201642	166.667	68.6667	ENSG00000204789	ZNF204P	zinc finger protein 204, pseudogene [Source:HGNC Symbol;Acc:HGNC:12995]
ENSG00000164024	2008.98	0.360563	0.0467649	7.71011	1.2571e-14	9.22936e-14	0.001546	1652	2201.67	ENSG00000164024	METAP1	methionyl aminopeptidase 1 [Source:HGNC Symbol;Acc:HGNC:15789]
ENSG00000163162	1532.28	-0.319503	0.0414462	-7.70884	1.26965e-14	9.31654e-14	0.00103223	1727	1437.17	ENSG00000163162	RNF149	ring finger protein 149 [Source:HGNC Symbol;Acc:HGNC:23137]
ENSG00000198832	274.934	-0.823561	0.106879	-7.70556	1.30269e-14	9.55396e-14	0.00771395	379.333	222.333	ENSG00000198832	SELENOM	selenoprotein M [Source:HGNC Symbol;Acc:HGNC:30397]
ENSG00000108854	13343.8	-0.416762	0.0540886	-7.70518	1.3066e-14	9.57758e-14	0.00274123	15657.3	12192.3	ENSG00000108854	SMURF2	SMAD specific E3 ubiquitin protein ligase 2 [Source:HGNC Symbol;Acc:HGNC:16809]
ENSG00000134668	696.131	-0.641439	0.0832713	-7.703	1.32904e-14	9.73696e-14	0.00535706	892.667	596	ENSG00000134668	SPOCD1	SPOC domain containing 1 [Source:HGNC Symbol;Acc:HGNC:26338]
ENSG00000170855	874.014	0.545388	0.0708151	7.70158	1.34394e-14	9.84097e-14	0.00346234	654.333	991	ENSG00000170855	TRIAP1	TP53 regulated inhibitor of apoptosis 1 [Source:HGNC Symbol;Acc:HGNC:26937]
ENSG00000104081	219.047	-0.980443	0.127326	-7.70024	1.35813e-14	9.93963e-14	0.0115014	320	167.833	ENSG00000104081	BMF	Bcl2 modifying factor [Source:HGNC Symbol;Acc:HGNC:24132]
ENSG00000142327	1593.85	-0.448334	0.0582307	-7.69927	1.36844e-14	1.00098e-13	0.00267516	1897.67	1443.33	ENSG00000142327	RNPEPL1	arginyl aminopeptidase like 1 [Source:HGNC Symbol;Acc:HGNC:10079]
ENSG00000126653	2168.05	0.439243	0.0570826	7.69485	1.41656e-14	1.03564e-13	0.00260332	1714.33	2413.83	ENSG00000126653	NSRP1	nuclear speckle splicing regulatory protein 1 [Source:HGNC Symbol;Acc:HGNC:25305]
ENSG00000236698	972.129	0.494963	0.0643302	7.6941	1.42492e-14	1.0412e-13	0.00277767	746.667	1091.67	ENSG00000236698	EIF1AXP1	EIF1AX pseudogene 1 [Source:HGNC Symbol;Acc:HGNC:19900]
ENSG00000120709	2672.47	0.509982	0.0663119	7.69065	1.46386e-14	1.0691e-13	0.003787	2038.67	3009.67	ENSG00000120709	FAM53C	family with sequence similarity 53 member C [Source:HGNC Symbol;Acc:HGNC:1336]
ENSG00000184292	1068.83	0.880398	0.114509	7.68846	1.48921e-14	1.08704e-13	0.0113424	670	1277.83	ENSG00000184292	TACSTD2	tumor associated calcium signal transducer 2 [Source:HGNC Symbol;Acc:HGNC:11530]
ENSG00000166946	1141.25	-0.496574	0.0646297	-7.68337	1.5496e-14	1.13053e-13	0.00320453	1385.67	1019.33	ENSG00000166946	CCNDBP1	cyclin D1 binding protein 1 [Source:HGNC Symbol;Acc:HGNC:1587]
ENSG00000135636	15909.4	-0.630569	0.0821507	-7.67576	1.64441e-14	1.19906e-13	0.00642769	20347.3	13663.3	ENSG00000135636	DYSF	dysferlin [Source:HGNC Symbol;Acc:HGNC:3097]
ENSG00000104213	235.701	-0.867459	0.113017	-7.67545	1.64842e-14	1.20136e-13	0.00847541	330.667	187.833	ENSG00000104213	PDGFRL	platelet derived growth factor receptor like [Source:HGNC Symbol;Acc:HGNC:8805]
ENSG00000143514	2720.71	0.400037	0.052122	7.67502	1.65396e-14	1.20477e-13	0.00219518	2193.33	3004.5	ENSG00000143514	TP53BP2	tumor protein p53 binding protein 2 [Source:HGNC Symbol;Acc:HGNC:12000]
ENSG00000118523	20325.5	-0.554825	0.0722962	-7.67433	1.66286e-14	1.21062e-13	0.00497728	25181	17840.7	ENSG00000118523	CTGF	connective tissue growth factor [Source:HGNC Symbol;Acc:HGNC:2500]
ENSG00000102900	3831.84	0.347903	0.0453364	7.67382	1.66944e-14	1.21477e-13	0.00168489	3169.33	4187.5	ENSG00000102900	NUP93	nucleoporin 93 [Source:HGNC Symbol;Acc:HGNC:28958]
ENSG00000130165	829.126	0.520931	0.0678852	7.6737	1.67105e-14	1.21531e-13	0.00301039	628.667	936	ENSG00000130165	ELOF1	elongation factor 1 homolog [Source:HGNC Symbol;Acc:HGNC:28691]
ENSG00000166260	1966.54	0.361013	0.04705	7.67296	1.68066e-14	1.22166e-13	0.00155962	1616.33	2155.33	ENSG00000166260	COX11	cytochrome c oxidase copper chaperone COX11 [Source:HGNC Symbol;Acc:HGNC:2261]
ENSG00000198825	2508.97	-0.413769	0.0539272	-7.67273	1.68375e-14	1.22326e-13	0.00242218	2943.67	2293.33	ENSG00000198825	INPP5F	inositol polyphosphate-5-phosphatase F [Source:HGNC Symbol;Acc:HGNC:17054]
ENSG00000111203	499.501	0.648733	0.0845653	7.67139	1.70149e-14	1.23551e-13	0.00441036	354	577	ENSG00000111203	ITFG2	integrin alpha FG-GAP repeat containing 2 [Source:HGNC Symbol;Acc:HGNC:30879]
ENSG00000125812	1222.87	0.533696	0.0695889	7.66927	1.72977e-14	1.25539e-13	0.00368762	920.667	1383.33	ENSG00000125812	GZF1	GDNF inducible zinc finger protein 1 [Source:HGNC Symbol;Acc:HGNC:15808]
ENSG00000139323	1387.05	-0.394592	0.0514651	-7.66717	1.75834e-14	1.27546e-13	0.00186993	1613.67	1274.83	ENSG00000139323	POC1B	POC1 centriolar protein B [Source:HGNC Symbol;Acc:HGNC:30836]
ENSG00000116668	203.483	-0.760608	0.0992052	-7.66701	1.76049e-14	1.27636e-13	0.00503105	273.667	167.667	ENSG00000116668	SWT1	SWT1, RNA endoribonuclease homolog [Source:HGNC Symbol;Acc:HGNC:16785]
ENSG00000115762	8711.77	0.246318	0.0321313	7.66598	1.77471e-14	1.286e-13	0.00086824	7576.33	9330.33	ENSG00000115762	PLEKHB2	pleckstrin homology domain containing B2 [Source:HGNC Symbol;Acc:HGNC:19236]
ENSG00000092929	13709.4	0.221137	0.0288474	7.66575	1.77786e-14	1.28761e-13	0.00072152	12076.7	14610.7	ENSG00000092929	UNC13D	unc-13 homolog D [Source:HGNC Symbol;Acc:HGNC:23147]
ENSG00000072858	78.1381	-1.3825	0.1804	-7.66352	1.80908e-14	1.30953e-13	0.0196759	130	51.6667	ENSG00000072858	SIDT1	SID1 transmembrane family member 1 [Source:HGNC Symbol;Acc:HGNC:25967]
ENSG00000121578	410.362	-0.624967	0.0815733	-7.66142	1.83885e-14	1.33039e-13	0.00417557	524.333	352.667	ENSG00000121578	B4GALT4	beta-1,4-galactosyltransferase 4 [Source:HGNC Symbol;Acc:HGNC:927]
ENSG00000143153	8160.06	0.462697	0.0604014	7.66036	1.8541e-14	1.34073e-13	0.00336438	6376.33	9111.17	ENSG00000143153	ATP1B1	ATPase Na+/K+ transporting subunit beta 1 [Source:HGNC Symbol;Acc:HGNC:804]
ENSG00000011485	3200.41	0.299918	0.0391545	7.65986	1.86138e-14	1.34498e-13	0.00113081	2711.33	3465.67	ENSG00000011485	PPP5C	protein phosphatase 5 catalytic subunit [Source:HGNC Symbol;Acc:HGNC:9322]
ENSG00000114120	2198.21	-0.322205	0.0420643	-7.65982	1.86191e-14	1.34498e-13	0.0012693	2481	2060.33	ENSG00000114120	SLC25A36	solute carrier family 25 member 36 [Source:HGNC Symbol;Acc:HGNC:25554]
ENSG00000108528	2295.58	0.333928	0.0436004	7.65884	1.87614e-14	1.35456e-13	0.00134455	1914	2502.83	ENSG00000108528	SLC25A11	solute carrier family 25 member 11 [Source:HGNC Symbol;Acc:HGNC:10981]
ENSG00000133138	240.282	-0.860186	0.112341	-7.6569	1.90468e-14	1.37445e-13	0.00839946	335.333	192	ENSG00000133138	TBC1D8B	TBC1 domain family member 8B [Source:HGNC Symbol;Acc:HGNC:24715]
ENSG00000141127	1337.28	0.355366	0.046431	7.65364	1.9537e-14	1.40909e-13	0.00123855	1102.67	1463.83	ENSG00000141127	PRPSAP2	phosphoribosyl pyrophosphate synthetase associated protein 2 [Source:HGNC Symbol;Acc:HGNC:9467]
ENSG00000163235	1686.11	-0.721791	0.0943313	-7.65166	1.98403e-14	1.43023e-13	0.0080149	2238	1408.33	ENSG00000163235	TGFA	transforming growth factor alpha [Source:HGNC Symbol;Acc:HGNC:11765]
ENSG00000182827	1824.63	-0.398412	0.0520768	-7.65047	2.00246e-14	1.44276e-13	0.00209288	2125.67	1673.67	ENSG00000182827	ACBD3	acyl-CoA binding domain containing 3 [Source:HGNC Symbol;Acc:HGNC:15453]
ENSG00000176894	264.642	0.78818	0.10304	7.64924	2.02172e-14	1.45589e-13	0.00530659	174.333	312.167	ENSG00000176894	PXMP2	peroxisomal membrane protein 2 [Source:HGNC Symbol;Acc:HGNC:9716]
ENSG00000226549	297.575	-0.669381	0.0875533	-7.64541	2.08279e-14	1.49909e-13	0.00431937	387	252.333	ENSG00000226549	SCDP1	stearoyl-CoA desaturase pseudogene 1 [Source:HGNC Symbol;Acc:HGNC:10572]
ENSG00000149798	2164.67	-0.629749	0.0824292	-7.63987	2.17438e-14	1.5642e-13	0.00610848	2771	1859.17	ENSG00000149798	CDC42EP2	CDC42 effector protein 2 [Source:HGNC Symbol;Acc:HGNC:16263]
ENSG00000129691	2246.25	0.299501	0.0392059	7.63919	2.1859e-14	1.57168e-13	0.000989394	1904	2432.17	ENSG00000129691	ASH2L	ASH2 like, histone lysine methyltransferase complex subunit [Source:HGNC Symbol;Acc:HGNC:744]
ENSG00000140563	793.007	-0.873498	0.11437	-7.63748	2.21515e-14	1.59189e-13	0.0114396	1111	630.333	ENSG00000140563	MCTP2	multiple C2 and transmembrane domain containing 2 [Source:HGNC Symbol;Acc:HGNC:25636]
ENSG00000205517	237.012	-1.11275	0.145729	-7.63575	2.24511e-14	1.61258e-13	0.0166352	359.667	173.667	ENSG00000205517	RGL3	ral guanine nucleotide dissociation stimulator like 3 [Source:HGNC Symbol;Acc:HGNC:30282]
ENSG00000121957	4342.56	-0.239694	0.031394	-7.63502	2.25794e-14	1.62096e-13	0.00072572	4731	4157	ENSG00000121957	GPSM2	G protein signaling modulator 2 [Source:HGNC Symbol;Acc:HGNC:29501]
ENSG00000075213	2161.28	-0.318041	0.041664	-7.63348	2.28502e-14	1.63956e-13	0.00122942	2434	2027.83	ENSG00000075213	SEMA3A	semaphorin 3A [Source:HGNC Symbol;Acc:HGNC:10723]
ENSG00000153029	218.364	-1.55069	0.203193	-7.63162	2.3182e-14	1.66251e-13	0.0354479	380.333	135.167	ENSG00000153029	MR1	major histocompatibility complex, class I-related [Source:HGNC Symbol;Acc:HGNC:4975]
ENSG00000269343	763.474	0.986686	0.129351	7.62796	2.38501e-14	1.70955e-13	0.0142392	451	927.833	ENSG00000269343	ZNF587B	zinc finger protein 587B [Source:HGNC Symbol;Acc:HGNC:37142]
ENSG00000082516	4055.56	0.401078	0.0525885	7.62673	2.40783e-14	1.72501e-13	0.0023787	3265.33	4480.33	ENSG00000082516	GEMIN5	gem nuclear organelle associated protein 5 [Source:HGNC Symbol;Acc:HGNC:20043]
ENSG00000085871	668.382	-0.551175	0.0722772	-7.62585	2.42422e-14	1.73586e-13	0.00364696	829.333	587	ENSG00000085871	MGST2	microsomal glutathione S-transferase 2 [Source:HGNC Symbol;Acc:HGNC:7063]
ENSG00000119523	1157.11	0.366644	0.0480996	7.6226	2.4862e-14	1.77933e-13	0.00125719	948.667	1270	ENSG00000119523	ALG2	ALG2, alpha-1,3/1,6-mannosyltransferase [Source:HGNC Symbol;Acc:HGNC:23159]
ENSG00000131374	4467.91	-0.410833	0.0539072	-7.62112	2.51488e-14	1.79893e-13	0.00258321	5231	4084.33	ENSG00000131374	TBC1D5	TBC1 domain family member 5 [Source:HGNC Symbol;Acc:HGNC:19166]
ENSG00000155254	1588.77	0.469802	0.0616547	7.61989	2.53891e-14	1.81519e-13	0.00292522	1236.67	1776.33	ENSG00000155254	MARVELD1	MARVEL domain containing 1 [Source:HGNC Symbol;Acc:HGNC:28674]
ENSG00000148835	1795.56	0.427527	0.0561096	7.6195	2.54652e-14	1.81969e-13	0.0023903	1427.33	1991.17	ENSG00000148835	TAF5	TATA-box binding protein associated factor 5 [Source:HGNC Symbol;Acc:HGNC:11539]
ENSG00000110429	1367.76	-0.418633	0.0549624	-7.61672	2.60205e-14	1.85842e-13	0.0022205	1607.33	1249.33	ENSG00000110429	FBXO3	F-box protein 3 [Source:HGNC Symbol;Acc:HGNC:13582]
ENSG00000061656	280.17	-0.721445	0.0947283	-7.61594	2.61784e-14	1.86873e-13	0.00539943	371	233.833	ENSG00000061656	SPAG4	sperm associated antigen 4 [Source:HGNC Symbol;Acc:HGNC:11214]
ENSG00000115756	11309.9	-0.486975	0.0639497	-7.61498	2.63742e-14	1.88175e-13	0.00384791	13692.3	10120	ENSG00000115756	HPCAL1	hippocalcin like 1 [Source:HGNC Symbol;Acc:HGNC:5145]
ENSG00000162078	262.167	-0.763149	0.100229	-7.61405	2.65647e-14	1.89436e-13	0.00621768	353	215.667	ENSG00000162078	ZG16B	zymogen granule protein 16B [Source:HGNC Symbol;Acc:HGNC:30456]
ENSG00000143776	7888.58	-0.283294	0.0372158	-7.61221	2.69453e-14	1.92053e-13	0.00120996	8749	7469.33	ENSG00000143776	CDC42BPA	CDC42 binding protein kinase alpha [Source:HGNC Symbol;Acc:HGNC:1737]
ENSG00000236438	298.729	-0.882361	0.115932	-7.61104	2.71896e-14	1.93695e-13	0.00991927	420.333	237.333	ENSG00000236438	FAM157A	family with sequence similarity 157 member A [Source:HGNC Symbol;Acc:HGNC:34079]
ENSG00000236603	600.631	0.572526	0.075229	7.61045	2.7315e-14	1.94488e-13	0.00344578	443.333	684.167	ENSG00000236603	RANP1	RAN, member RAS oncogene family pseudogene 1 [Source:HGNC Symbol;Acc:HGNC:21631]
ENSG00000105202	5184.57	0.236677	0.0311117	7.60733	2.79826e-14	1.9914e-13	0.000722644	4531	5542.83	ENSG00000105202	FBL	fibrillarin [Source:HGNC Symbol;Acc:HGNC:3599]
ENSG00000003147	245.577	-1.11714	0.146869	-7.60637	2.81907e-14	2.00518e-13	0.0170878	374.333	179.667	ENSG00000003147	ICA1	islet cell autoantigen 1 [Source:HGNC Symbol;Acc:HGNC:5343]
ENSG00000055211	1678.5	-0.323748	0.0425667	-7.60566	2.83453e-14	2.01515e-13	0.00117694	1895.67	1572.67	ENSG00000055211	GINM1	glycoprotein integral membrane 1 [Source:HGNC Symbol;Acc:HGNC:21074]
ENSG00000172922	1493.99	0.40537	0.0533071	7.60443	2.86158e-14	2.03334e-13	0.00197301	1201.33	1650.83	ENSG00000172922	RNASEH2C	ribonuclease H2 subunit C [Source:HGNC Symbol;Acc:HGNC:24116]
ENSG00000102870	1481.77	0.502421	0.0660754	7.60376	2.8764e-14	2.04283e-13	0.00340678	1134.33	1667.67	ENSG00000102870	ZNF629	zinc finger protein 629 [Source:HGNC Symbol;Acc:HGNC:29008]
ENSG00000198945	504.749	-0.567319	0.0746319	-7.60157	2.92561e-14	2.07672e-13	0.00353784	630	441.5	ENSG00000198945	L3MBTL3	L3MBTL3, histone methyl-lysine binding protein [Source:HGNC Symbol;Acc:HGNC:23035]
ENSG00000176273	435.375	0.685504	0.090241	7.59637	3.04545e-14	2.16068e-13	0.00496145	302.333	505	ENSG00000176273	SLC35G1	solute carrier family 35 member G1 [Source:HGNC Symbol;Acc:HGNC:26607]
ENSG00000138166	14549.3	-0.80986	0.106632	-7.59494	3.07939e-14	2.18365e-13	0.010864	19958.7	11814	ENSG00000138166	DUSP5	dual specificity phosphatase 5 [Source:HGNC Symbol;Acc:HGNC:3071]
ENSG00000188610	576.848	-0.585186	0.0770558	-7.59431	3.09429e-14	2.1931e-13	0.00412073	724.667	501.833	ENSG00000188610	FAM72B	family with sequence similarity 72 member B [Source:HGNC Symbol;Acc:HGNC:24805]
ENSG00000122707	597.928	-0.663874	0.0874225	-7.59385	3.10535e-14	2.19982e-13	0.00582652	776.333	507.5	ENSG00000122707	RECK	reversion inducing cysteine rich protein with kazal motifs [Source:HGNC Symbol;Acc:HGNC:11345]
ENSG00000071282	381.322	-0.88673	0.116772	-7.59366	3.11004e-14	2.20202e-13	0.0107554	537	302	ENSG00000071282	LMCD1	LIM and cysteine rich domains 1 [Source:HGNC Symbol;Acc:HGNC:6633]
ENSG00000173320	249.694	-0.776467	0.102267	-7.59255	3.13664e-14	2.21973e-13	0.00644652	337.667	204.833	ENSG00000173320	STOX2	storkhead box 2 [Source:HGNC Symbol;Acc:HGNC:25450]
ENSG00000080031	205.938	-1.61019	0.212129	-7.59061	3.18396e-14	2.25207e-13	0.0387246	365	124.5	ENSG00000080031	PTPRH	protein tyrosine phosphatase, receptor type H [Source:HGNC Symbol;Acc:HGNC:9672]
ENSG00000105289	35.9264	-2.06706	0.272466	-7.58648	3.28717e-14	2.32389e-13	0.0431125	71.3333	17.6667	ENSG00000105289	TJP3	tight junction protein 3 [Source:HGNC Symbol;Acc:HGNC:11829]
ENSG00000214140	124.202	-1.46286	0.192828	-7.58635	3.29045e-14	2.32503e-13	0.0283723	210.667	79.5	ENSG00000214140	PRCD	photoreceptor disc component [Source:HGNC Symbol;Acc:HGNC:32528]
ENSG00000012963	2270.02	0.390169	0.0514428	7.58452	3.33729e-14	2.35693e-13	0.00204668	1840	2500.17	ENSG00000012963	UBR7	ubiquitin protein ligase E3 component n-recognin 7 (putative) [Source:HGNC Symbol;Acc:HGNC:20344]
ENSG00000175938	325.27	-0.776316	0.102361	-7.58408	3.34854e-14	2.36367e-13	0.00730273	441	266.833	ENSG00000175938	ORAI3	ORAI calcium release-activated calcium modulator 3 [Source:HGNC Symbol;Acc:HGNC:28185]
ENSG00000170965	114.256	-1.00927	0.13316	-7.57938	3.47205e-14	2.44961e-13	0.00922218	168	86.6667	ENSG00000170965	PLAC1	placenta specific 1 [Source:HGNC Symbol;Acc:HGNC:9044]
ENSG00000167378	2403.46	0.425205	0.0561358	7.57457	3.60308e-14	2.54077e-13	0.00255407	1912.67	2665.67	ENSG00000167378	IRGQ	immunity related GTPase Q [Source:HGNC Symbol;Acc:HGNC:24868]
ENSG00000074964	482.974	-0.618997	0.0817294	-7.57374	3.62637e-14	2.5559e-13	0.0045332	616	416.5	ENSG00000074964	ARHGEF10L	Rho guanine nucleotide exchange factor 10 like [Source:HGNC Symbol;Acc:HGNC:25540]
ENSG00000145390	2262.62	-0.307476	0.0406023	-7.57286	3.65086e-14	2.57186e-13	0.00116436	2536.33	2128.33	ENSG00000145390	USP53	ubiquitin specific peptidase 53 [Source:HGNC Symbol;Acc:HGNC:29255]
ENSG00000143436	1288.76	0.406566	0.0536913	7.5723	3.66678e-14	2.58177e-13	0.00189159	1036	1424.33	ENSG00000143436	MRPL9	mitochondrial ribosomal protein L9 [Source:HGNC Symbol;Acc:HGNC:14277]
ENSG00000111266	907.013	-0.842248	0.111339	-7.56474	3.88628e-14	2.73493e-13	0.010923	1258	729.333	ENSG00000111266	DUSP16	dual specificity phosphatase 16 [Source:HGNC Symbol;Acc:HGNC:17909]
ENSG00000035141	4275.97	0.522591	0.0690994	7.56289	3.94212e-14	2.77283e-13	0.00431291	3240.67	4830.83	ENSG00000035141	FAM136A	family with sequence similarity 136 member A [Source:HGNC Symbol;Acc:HGNC:25911]
ENSG00000047056	1116.48	0.522553	0.0690969	7.56262	3.95043e-14	2.77617e-13	0.00353394	844.333	1260.33	ENSG00000047056	WDR37	WD repeat domain 37 [Source:HGNC Symbol;Acc:HGNC:31406]
ENSG00000143183	2810.36	0.279	0.036892	7.5626	3.95085e-14	2.77617e-13	0.000920403	2406.67	3029.67	ENSG00000143183	TMCO1	transmembrane and coiled-coil domains 1 [Source:HGNC Symbol;Acc:HGNC:18188]
ENSG00000178726	1701.15	-0.875028	0.115731	-7.56084	4.00462e-14	2.81253e-13	0.0123437	2386	1353.17	ENSG00000178726	THBD	thrombomodulin [Source:HGNC Symbol;Acc:HGNC:11784]
ENSG00000109572	4123.6	-0.301894	0.0399419	-7.55834	4.08246e-14	2.86575e-13	0.00130244	4617.33	3883.83	ENSG00000109572	CLCN3	chloride voltage-gated channel 3 [Source:HGNC Symbol;Acc:HGNC:2021]
ENSG00000176371	200.738	-0.810173	0.107195	-7.55791	4.09604e-14	2.87383e-13	0.00657244	275.667	163.167	ENSG00000176371	ZSCAN2	zinc finger and SCAN domain containing 2 [Source:HGNC Symbol;Acc:HGNC:20994]
ENSG00000184787	3297.54	0.458742	0.0606976	7.55782	4.09876e-14	2.8743e-13	0.00319091	2576.67	3682	ENSG00000184787	UBE2G2	ubiquitin conjugating enzyme E2 G2 [Source:HGNC Symbol;Acc:HGNC:12483]
ENSG00000168827	2165.26	0.339056	0.0448678	7.55677	4.1319e-14	2.89607e-13	0.0014224	1799	2362.17	ENSG00000168827	GFM1	G elongation factor mitochondrial 1 [Source:HGNC Symbol;Acc:HGNC:13780]
ENSG00000102753	4602.03	0.282462	0.0373935	7.55376	4.22872e-14	2.96245e-13	0.00110677	3933.67	4966.5	ENSG00000102753	KPNA3	karyopherin subunit alpha 3 [Source:HGNC Symbol;Acc:HGNC:6396]
ENSG00000073605	62.9727	-2.00261	0.26513	-7.55333	4.24272e-14	2.96976e-13	0.0516695	122.667	31.8333	ENSG00000073605	GSDMB	gasdermin B [Source:HGNC Symbol;Acc:HGNC:23690]
ENSG00000079785	7768.1	0.341835	0.0452563	7.55331	4.24343e-14	2.96976e-13	0.00182521	6452.67	8480	ENSG00000079785	DDX1	DEAD-box helicase 1 [Source:HGNC Symbol;Acc:HGNC:2734]
ENSG00000181991	1054.37	0.460819	0.0610182	7.55215	4.28136e-14	2.9948e-13	0.00248503	825.333	1177.5	ENSG00000181991	MRPS11	mitochondrial ribosomal protein S11 [Source:HGNC Symbol;Acc:HGNC:14050]
ENSG00000171720	3082.77	0.328906	0.0435638	7.55	4.35264e-14	3.04313e-13	0.00146509	2575.67	3356.5	ENSG00000171720	HDAC3	histone deacetylase 3 [Source:HGNC Symbol;Acc:HGNC:4854]
ENSG00000151617	92.3965	-1.44015	0.190767	-7.54929	4.37625e-14	3.0581e-13	0.0251102	156	59.8333	ENSG00000151617	EDNRA	endothelin receptor type A [Source:HGNC Symbol;Acc:HGNC:3179]
ENSG00000196642	3480.43	0.351956	0.0466532	7.54411	4.55389e-14	3.18064e-13	0.00177161	2874.33	3806.67	ENSG00000196642	RABL6	RAB, member RAS oncogene family like 6 [Source:HGNC Symbol;Acc:HGNC:24703]
ENSG00000177283	521.62	1.05604	0.140015	7.54232	4.61686e-14	3.223e-13	0.0160673	297	640.833	ENSG00000177283	FZD8	frizzled class receptor 8 [Source:HGNC Symbol;Acc:HGNC:4046]
ENSG00000041880	988.623	-0.425533	0.0564263	-7.54139	4.64971e-14	3.24431e-13	0.00211655	1166	900.833	ENSG00000041880	PARP3	poly(ADP-ribose) polymerase family member 3 [Source:HGNC Symbol;Acc:HGNC:273]
ENSG00000180921	249.525	-1.04732	0.138892	-7.54054	4.68043e-14	3.2641e-13	0.0149583	371.667	187.167	ENSG00000180921	FAM83H	family with sequence similarity 83 member H [Source:HGNC Symbol;Acc:HGNC:24797]
ENSG00000198561	9504.37	-0.325475	0.0431664	-7.54001	4.69939e-14	3.27569e-13	0.00169085	10743.7	8898.33	ENSG00000198561	CTNND1	catenin delta 1 [Source:HGNC Symbol;Acc:HGNC:2515]
ENSG00000089009	25836.7	0.297827	0.0395283	7.53454	4.90042e-14	3.41411e-13	0.00145901	21924.7	27968.7	ENSG00000089009	RPL6	ribosomal protein L6 [Source:HGNC Symbol;Acc:HGNC:10362]
ENSG00000108840	1724.63	-0.780739	0.103631	-7.53386	4.92601e-14	3.43022e-13	0.00979783	2342	1413.5	ENSG00000108840	HDAC5	histone deacetylase 5 [Source:HGNC Symbol;Acc:HGNC:14068]
[truncated: 11,921 more rows]

## Sheet: WT vs KO1
	baseMean	log2FoldChange	lfcSE	stat	pvalue	padj	dispersion	rowmeans.control	rowmeans.treatment	ensembl_gene_id	hgnc_symbol	description
ENSG00000214049	1750.28	2.86232	0.082314	34.7732	6.17673e-265	8.59863e-261	0.00351741	414.333	3143.67	ENSG00000214049	UCA1	urothelial cancer associated 1 [Source:HGNC Symbol;Acc:HGNC:37126]
ENSG00000069122	6904.11	-1.58702	0.0482293	-32.9057	1.82044e-237	1.26712e-233	0.00148514	10163	3524.67	ENSG00000069122	ADGRF5	adhesion G protein-coupled receptor F5 [Source:HGNC Symbol;Acc:HGNC:19030]
ENSG00000072274	35934.2	0.981585	0.0341285	28.7615	6.51307e-182	3.02228e-178	0.000808014	23674.3	48736.3	ENSG00000072274	TFRC	transferrin receptor [Source:HGNC Symbol;Acc:HGNC:11763]
ENSG00000101361	10324.9	0.998633	0.0354111	28.2011	5.66645e-175	1.97207e-171	0.000793982	6748.67	14062	ENSG00000101361	NOP56	NOP56 ribonucleoprotein [Source:HGNC Symbol;Acc:HGNC:15911]
ENSG00000197172	668.821	2.46527	0.0893161	27.6016	1.06546e-167	2.96645e-164	0.0028285	201	1158	ENSG00000197172	MAGEA6	MAGE family member A6 [Source:HGNC Symbol;Acc:HGNC:6804]
ENSG00000118971	4713.42	-1.16535	0.0430854	-27.0475	4.0879e-161	9.48461e-158	0.00109115	6387.33	2970.67	ENSG00000118971	CCND2	cyclin D2 [Source:HGNC Symbol;Acc:HGNC:1583]
ENSG00000132470	1824.53	-1.74535	0.0646359	-27.0028	1.37027e-160	2.72508e-157	0.00224559	2757.33	857.667	ENSG00000132470	ITGB4	integrin subunit beta 4 [Source:HGNC Symbol;Acc:HGNC:6158]
ENSG00000023171	2178.09	-1.39044	0.0522919	-26.59	8.86627e-156	1.54284e-152	0.00140183	3088	1229.33	ENSG00000023171	GRAMD1B	GRAM domain containing 1B [Source:HGNC Symbol;Acc:HGNC:29214]
ENSG00000104368	9153.46	-1.00472	0.039487	-25.4442	8.17932e-143	1.26516e-139	0.00100152	11971.3	6222.33	ENSG00000104368	PLAT	plasminogen activator, tissue type [Source:HGNC Symbol;Acc:HGNC:9051]
ENSG00000117525	14016.9	1.23311	0.0486041	25.3705	5.3409e-142	7.43507e-139	0.00161657	8193	20097	ENSG00000117525	F3	coagulation factor III, tissue factor [Source:HGNC Symbol;Acc:HGNC:3541]
ENSG00000094804	6548.59	0.998802	0.040073	24.9246	4.02753e-137	5.09702e-134	0.000984323	4282.67	8918	ENSG00000094804	CDC6	cell division cycle 6 [Source:HGNC Symbol;Acc:HGNC:1744]
ENSG00000149177	9596.2	-1.07933	0.0439569	-24.5542	3.89892e-133	4.52307e-130	0.00127392	12780.7	6301.67	ENSG00000149177	PTPRJ	protein tyrosine phosphatase, receptor type J [Source:HGNC Symbol;Acc:HGNC:9673]
ENSG00000168672	1548.94	-1.55552	0.064445	-24.1372	1.01754e-128	1.08963e-125	0.00214981	2263.67	803.667	ENSG00000168672	FAM84B	family with sequence similarity 84 member B [Source:HGNC Symbol;Acc:HGNC:24166]
ENSG00000169174	1870.45	-1.35552	0.0566107	-23.9446	1.05132e-126	1.04539e-123	0.00165429	2638.33	1074.33	ENSG00000169174	PCSK9	proprotein convertase subtilisin/kexin type 9 [Source:HGNC Symbol;Acc:HGNC:20001]
ENSG00000091490	1897.06	-1.5044	0.0636804	-23.6242	2.1746e-123	2.01817e-120	0.00224569	2753	1011.33	ENSG00000091490	SEL1L3	SEL1L family member 3 [Source:HGNC Symbol;Acc:HGNC:29108]
ENSG00000187720	3530.95	-1.30121	0.0563228	-23.1027	4.34777e-118	3.78283e-115	0.00194441	4918.33	2083.33	ENSG00000187720	THSD4	thrombospondin type 1 domain containing 4 [Source:HGNC Symbol;Acc:HGNC:25835]
ENSG00000124193	10198.4	0.904115	0.0394555	22.9148	3.3072e-116	2.7082e-113	0.0010132	6965.67	13589.3	ENSG00000124193	SRSF6	serine and arginine rich splicing factor 6 [Source:HGNC Symbol;Acc:HGNC:10788]
ENSG00000108582	11931.8	-1.01508	0.0444971	-22.8123	3.46387e-115	2.67891e-112	0.001333	15667	8075	ENSG00000108582	CPD	carboxypeptidase D [Source:HGNC Symbol;Acc:HGNC:2301]
ENSG00000114796	1587.74	-1.4283	0.0628019	-22.7429	1.68714e-114	1.23614e-111	0.00205311	2270.33	879.667	ENSG00000114796	KLHL24	kelch like family member 24 [Source:HGNC Symbol;Acc:HGNC:25947]
ENSG00000171848	13384.5	0.99028	0.0440691	22.4711	7.9663e-112	5.54494e-109	0.00131515	8793.67	18191.7	ENSG00000171848	RRM2	ribonucleotide reductase regulatory subunit M2 [Source:HGNC Symbol;Acc:HGNC:10452]
ENSG00000123384	1749.82	-1.45698	0.0649346	-22.4376	1.69143e-111	1.12126e-108	0.00231607	2517.33	955.333	ENSG00000123384	LRP1	LDL receptor related protein 1 [Source:HGNC Symbol;Acc:HGNC:6692]
ENSG00000104738	8508.24	0.84055	0.0377142	22.2874	4.90108e-110	3.10127e-107	0.000896488	5974.33	11159.3	ENSG00000104738	MCM4	minichromosome maintenance complex component 4 [Source:HGNC Symbol;Acc:HGNC:6947]
ENSG00000134107	4804.36	-1.25638	0.0568415	-22.1032	2.94284e-108	1.78118e-105	0.0020805	6654.67	2897.67	ENSG00000134107	BHLHE40	basic helix-loop-helix family member e40 [Source:HGNC Symbol;Acc:HGNC:1046]
ENSG00000054793	3189.27	-1.3903	0.0631547	-22.0141	2.10794e-107	1.22269e-104	0.00248601	4528.33	1800.67	ENSG00000054793	ATP9A	ATPase phospholipid transporting 9A (putative) [Source:HGNC Symbol;Acc:HGNC:13540]
ENSG00000151651	4406.22	-1.11276	0.0508497	-21.8833	3.74679e-106	2.08636e-103	0.00160311	5914	2849.33	ENSG00000151651	ADAM8	ADAM metallopeptidase domain 8 [Source:HGNC Symbol;Acc:HGNC:215]
ENSG00000162337	10179.5	-1.15164	0.0529371	-21.7549	6.2131e-105	3.32664e-102	0.00190577	13788.7	6461.33	ENSG00000162337	LRP5	LDL receptor related protein 5 [Source:HGNC Symbol;Acc:HGNC:6697]
ENSG00000185033	4072.54	-1.05097	0.04855	-21.6471	6.47267e-104	3.33726e-101	0.00142121	5390.67	2710.67	ENSG00000185033	SEMA4B	semaphorin 4B [Source:HGNC Symbol;Acc:HGNC:10730]
ENSG00000167747	1757.96	1.1532	0.0538175	21.428	7.32186e-102	3.64027e-99	0.00141736	1068.67	2478.67	ENSG00000167747	C19orf48	chromosome 19 open reading frame 48 [Source:HGNC Symbol;Acc:HGNC:29667]
ENSG00000168906	7569.59	0.96324	0.0450346	21.3889	1.69454e-101	8.1344e-99	0.00131319	5023	10227	ENSG00000168906	MAT2A	methionine adenosyltransferase 2A [Source:HGNC Symbol;Acc:HGNC:6904]
ENSG00000139289	16831.8	-0.783515	0.0366922	-21.3537	3.60032e-101	1.67067e-98	0.000906713	20871.7	12641.7	ENSG00000139289	PHLDA1	pleckstrin homology like domain family A member 1 [Source:HGNC Symbol;Acc:HGNC:8933]
ENSG00000119138	491.926	-2.19565	0.103498	-21.2143	7.04408e-100	3.16325e-97	0.00431228	791.333	180.333	ENSG00000119138	KLF9	Kruppel like factor 9 [Source:HGNC Symbol;Acc:HGNC:1123]
ENSG00000175274	1239.03	-1.3899	0.065628	-21.1785	1.50735e-99	6.55742e-97	0.00210417	1756.33	699.333	ENSG00000175274	TP53I11	tumor protein p53 inducible protein 11 [Source:HGNC Symbol;Acc:HGNC:16842]
ENSG00000163814	21563.3	-0.787661	0.0375064	-21.0007	6.46229e-98	2.72611e-95	0.000964162	26788	16167.3	ENSG00000163814	CDCP1	CUB domain containing protein 1 [Source:HGNC Symbol;Acc:HGNC:24357]
ENSG00000142173	2905.44	-1.10579	0.0530807	-20.8323	2.20411e-96	9.02452e-94	0.00163642	3893	1884.67	ENSG00000142173	COL6A2	collagen type VI alpha 2 chain [Source:HGNC Symbol;Acc:HGNC:2212]
ENSG00000173546	2367.64	-1.35686	0.0652767	-20.7863	5.76094e-96	2.29137e-93	0.00255283	3335	1359.67	ENSG00000173546	CSPG4	chondroitin sulfate proteoglycan 4 [Source:HGNC Symbol;Acc:HGNC:2466]
ENSG00000031003	1926.19	1.26671	0.0613784	20.6378	1.25751e-94	4.86271e-92	0.00208367	1108.33	2779.33	ENSG00000031003	FAM13B	family with sequence similarity 13 member B [Source:HGNC Symbol;Acc:HGNC:1335]
ENSG00000116560	15975	0.93414	0.0452831	20.6289	1.5111e-94	5.68541e-92	0.00140793	10769.7	21440.3	ENSG00000116560	SFPQ	splicing factor proline and glutamine rich [Source:HGNC Symbol;Acc:HGNC:10774]
ENSG00000058668	3357.53	-0.888991	0.0431967	-20.58	4.14317e-94	1.51782e-91	0.00101983	4275	2407	ENSG00000058668	ATP2B4	ATPase plasma membrane Ca2+ transporting 4 [Source:HGNC Symbol;Acc:HGNC:817]
ENSG00000120800	6688.43	0.755349	0.0370013	20.4141	1.25359e-92	4.47469e-90	0.000825796	4875	8582.67	ENSG00000120800	UTP20	UTP20, small subunit processome component [Source:HGNC Symbol;Acc:HGNC:17897]
ENSG00000131069	4425.56	-0.835181	0.0409727	-20.3839	2.32545e-92	8.09315e-90	0.000965871	5557.67	3248.67	ENSG00000131069	ACSS2	acyl-CoA synthetase short chain family member 2 [Source:HGNC Symbol;Acc:HGNC:15814]
ENSG00000276043	4841.08	0.869838	0.0431716	20.1484	2.77986e-90	9.43865e-88	0.00111587	3357.67	6394.67	ENSG00000276043	UHRF1	ubiquitin like with PHD and ring finger domains 1 [Source:HGNC Symbol;Acc:HGNC:12556]
ENSG00000090339	2771.7	-1.30886	0.0652008	-20.0743	1.2374e-89	4.1014e-87	0.00262739	3868.67	1629.67	ENSG00000090339	ICAM1	intercellular adhesion molecule 1 [Source:HGNC Symbol;Acc:HGNC:5344]
ENSG00000167107	958.605	-1.49927	0.0748307	-20.0355	2.70007e-89	8.74133e-87	0.00269824	1388.33	512	ENSG00000167107	ACSF2	acyl-CoA synthetase family member 2 [Source:HGNC Symbol;Acc:HGNC:26101]
ENSG00000163811	6510.92	0.75889	0.0381879	19.8725	7.03868e-88	2.22694e-85	0.000885608	4741.33	8363.67	ENSG00000163811	WDR43	WD repeat domain 43 [Source:HGNC Symbol;Acc:HGNC:28945]
ENSG00000141076	3443.42	0.92152	0.0463764	19.8705	7.3316e-88	2.26807e-85	0.00122686	2333.33	4605.67	ENSG00000141076	UTP4	UTP4, small subunit processome component [Source:HGNC Symbol;Acc:HGNC:1983]
ENSG00000188554	9646.41	-0.691491	0.034914	-19.8056	2.66629e-87	8.06901e-85	0.000769301	11675	7539.67	ENSG00000188554	NBR1	NBR1, autophagy cargo receptor [Source:HGNC Symbol;Acc:HGNC:6746]
ENSG00000166750	1078.3	-1.66274	0.0840402	-19.785	4.00755e-87	1.187e-84	0.00383309	1606	529.333	ENSG00000166750	SLFN5	schlafen family member 5 [Source:HGNC Symbol;Acc:HGNC:28286]
ENSG00000156804	786.745	-1.64536	0.0832237	-19.7703	5.36861e-87	1.54007e-84	0.00327991	1170.33	389.667	ENSG00000156804	FBXO32	F-box protein 32 [Source:HGNC Symbol;Acc:HGNC:16731]
ENSG00000184117	1529.48	-1.37179	0.0693884	-19.7698	5.42084e-87	1.54007e-84	0.00266447	2163	871.333	ENSG00000184117	NIPSNAP1	nipsnap homolog 1 [Source:HGNC Symbol;Acc:HGNC:7827]
ENSG00000197712	2627.12	-0.923964	0.046819	-19.7348	1.08405e-86	3.01821e-84	0.00116149	3373.33	1853	ENSG00000197712	FAM114A1	family with sequence similarity 114 member A1 [Source:HGNC Symbol;Acc:HGNC:25087]
ENSG00000142798	4045.74	-1.15756	0.0591838	-19.5586	3.48185e-85	9.50409e-83	0.0022375	5466.33	2560.33	ENSG00000142798	HSPG2	heparan sulfate proteoglycan 2 [Source:HGNC Symbol;Acc:HGNC:5273]
ENSG00000087074	5334.83	0.851437	0.0436559	19.5034	1.02788e-84	2.75177e-82	0.00116798	3726	7017.33	ENSG00000087074	PPP1R15A	protein phosphatase 1 regulatory subunit 15A [Source:HGNC Symbol;Acc:HGNC:14375]
ENSG00000130204	4914.95	0.985553	0.0506277	19.4667	2.1053e-84	5.52978e-82	0.00161748	3236.67	6673.67	ENSG00000130204	TOMM40	translocase of outer mitochondrial membrane 40 [Source:HGNC Symbol;Acc:HGNC:18001]
ENSG00000120875	33320.8	-0.718856	0.0369693	-19.4447	3.2323e-84	8.33275e-82	0.00095322	40672.3	25739.7	ENSG00000120875	DUSP4	dual specificity phosphatase 4 [Source:HGNC Symbol;Acc:HGNC:3070]
ENSG00000134013	16548	-0.672192	0.0345963	-19.4296	4.3378e-84	1.09794e-81	0.000799117	19941.7	13041.7	ENSG00000134013	LOXL2	lysyl oxidase like 2 [Source:HGNC Symbol;Acc:HGNC:6666]
ENSG00000105676	2808.96	0.960869	0.049816	19.2884	6.72742e-83	1.67236e-80	0.00138876	1868	3792	ENSG00000105676	ARMC6	armadillo repeat containing 6 [Source:HGNC Symbol;Acc:HGNC:25049]
ENSG00000182158	11133	-0.636211	0.0330057	-19.2758	8.58036e-83	2.09556e-80	0.000691255	13277.7	8909.33	ENSG00000182158	CREB3L2	cAMP responsive element binding protein 3 like 2 [Source:HGNC Symbol;Acc:HGNC:23720]
ENSG00000073849	1335.6	-1.18302	0.0615997	-19.2049	3.36454e-82	8.07549e-80	0.0018602	1817.67	835	ENSG00000073849	ST6GAL1	ST6 beta-galactoside alpha-2,6-sialyltransferase 1 [Source:HGNC Symbol;Acc:HGNC:10860]
ENSG00000138675	4812.72	0.82434	0.0430431	19.1515	9.40135e-82	2.21824e-79	0.00110863	3401.67	6286.67	ENSG00000138675	FGF5	fibroblast growth factor 5 [Source:HGNC Symbol;Acc:HGNC:3683]
ENSG00000167861	698.517	-1.51116	0.0795757	-18.9902	2.05605e-80	4.77038e-78	0.0027216	1014.33	371	ENSG00000167861	HID1	HID1 domain containing [Source:HGNC Symbol;Acc:HGNC:15736]
ENSG00000234745	4467.25	-0.880649	0.0465791	-18.9065	1.0079e-79	2.30015e-77	0.00131979	5681.67	3214	ENSG00000234745	HLA-B	major histocompatibility complex, class I, B [Source:HGNC Symbol;Acc:HGNC:4932]
ENSG00000123136	5271.03	0.770125	0.040895	18.8318	4.14659e-79	9.31043e-77	0.00100058	3821.67	6793	ENSG00000123136	DDX39A	DExD-box helicase 39A [Source:HGNC Symbol;Acc:HGNC:17821]
ENSG00000147274	8308.92	0.709661	0.0377137	18.8171	5.47438e-79	1.20966e-76	0.000896593	6182.67	10539	ENSG00000147274	RBMX	RNA binding motif protein X-linked [Source:HGNC Symbol;Acc:HGNC:9910]
ENSG00000119707	7755.63	0.794059	0.0422212	18.8071	6.60353e-79	1.43637e-76	0.00114494	5561.33	10053.7	ENSG00000119707	RBM25	RNA binding motif protein 25 [Source:HGNC Symbol;Acc:HGNC:23244]
ENSG00000162645	1335.09	-1.21805	0.0649445	-18.7552	1.75489e-78	3.75843e-76	0.00215682	1832.67	820.667	ENSG00000162645	GBP2	guanylate binding protein 2 [Source:HGNC Symbol;Acc:HGNC:4183]
ENSG00000130066	3001.85	-1.0531	0.0561537	-18.7539	1.8003e-78	3.79726e-76	0.00189571	3964.67	1995.33	ENSG00000130066	SAT1	spermidine/spermine N1-acetyltransferase 1 [Source:HGNC Symbol;Acc:HGNC:10540]
ENSG00000071054	12036.1	-0.682623	0.0364021	-18.7523	1.85366e-78	3.85146e-76	0.000867585	14544	9445.67	ENSG00000071054	MAP4K4	mitogen-activated protein kinase kinase kinase kinase 4 [Source:HGNC Symbol;Acc:HGNC:6866]
[truncated: 13,854 more rows]

## Sheet: WT vs KO2
	baseMean	log2FoldChange	lfcSE	stat	pvalue	padj	dispersion	rowmeans.control	rowmeans.treatment	ensembl_gene_id	hgnc_symbol	description
[truncated: 13,921 more rows]

## Sheet: pathways up
label	pval	fdr	gset.size	genes.overlap	hits
[truncated: 1,549 more rows]

[truncated: 1 more sheets: pathways dn]
