# Supplementary material for: Loss of G-Protein Pathway Suppressor 2 Promotes Tumor Growth Through Activation of AKT Signaling
Source: Front Cell Dev Biol. 2021 Jan 7;8:608044. doi: 10.3389/fcell.2020.608044 (PMC7817781; doi:10.3389/fcell.2020.608044)
Supplement: Supplementary file 7 [file Table_2.XLSX]

## Sheet: Proteomics
	Normalized Log2 Intensity, Row Z Score														GPS2-WT												Normalized Log2 Intensity
FEATURE	G11	G12	G16	G21	G22	WT1	WT2	WT3	WT4	WT5	GENE	PROTEIN	UNIPROT	MAXFC	P.VALUE	ADJ.P.VAL	LOGFC	UNIPROT_FUNCTION	UNIPROT_CELLULAR_LOCATION	UNIPROT_DISEASE	GO_BIOLOGICAL_PROCESS	GO_MOLECULAR_FUNCTION	GO_CELLULAR_COMPONENT	GO_ID	REACTOMEID	KEGG_ID	G11.1	G12.1	G16.1	G21.1	G22.1	WT1.1	WT2.1	WT3.1	WT4.1	WT5.1
UTS2_Q5H8X8	-0.948546	-1.06998	-0.893924	-0.889667	-0.925707	0.91456	0.867725	0.992452	0.86194	1.09114	UTS2	Urotensin-2	Q5H8X8	1.20787	2.04652e-12	1.46162e-08	-2.47869										11.9205	11.7614	11.9921	11.9977	11.9505	14.3625	14.3011	14.4646	14.2935	14.5939
DYNLL2_Q96FJ2	-0.94952	-0.956567	-1.06983	-0.843411	-0.905236	0.920817	0.90058	1.01202	0.810056	1.08108	DYNLL2	Dynein light chain 2, cytoplasmic	Q96FJ2	1.05728	1.8638e-11	6.65563e-08	-1.01079	FUNCTION: Acts as one of several non-catalytic accessory components of the cytoplasmic dynein 1 complex that are thought to be involved in linking dynein to cargos and to adapter proteins that regulate dynein function. Cytoplasmic dynein 1 acts as a motor for the intracellular retrograde motility of vesicles and organelles along microtubules. May play a role in changing or maintaining the spatial…	SUBCELLULAR LOCATION: Cytoplasm, cytoskeleton {ECO:0000250|UniProtKB:Q78P75}.		antigen processing and presentation of exogenous peptide antigen via MHC class II [GO:0019886]; endoplasmic reticulum to Golgi vesicle-mediated transport [GO:0006888]; intraciliary transport involved in cilium assembly [GO:0035735]; macroautophagy [GO:0016236]; positive regulation of ATP-dependent microtubule motor activity, plus-end-directed [GO:2000582]	dynein intermediate chain binding [GO:0045505]; dynein light intermediate chain binding [GO:0051959]; motor activity [GO:0003774]; protein heterodimerization activity [GO:0046982]; protein homodimerization activity [GO:0042803]; scaffold protein binding [GO:0097110]	centrosome [GO:0005813]; ciliary tip [GO:0097542]; cilium [GO:0005929]; cytoplasmic dynein complex [GO:0005868]; cytosol [GO:0005829]; dynein complex [GO:0030286]; glutamatergic synapse [GO:0098978]; membrane [GO:0016020]; microtubule [GO:0005874]; myosin V complex [GO:0031475]; nucleus [GO:0005634]; plasma membrane [GO:0005886]; postsynapse [GO:0098794]; postsynaptic density [GO:0014069]	GO:0003774; GO:0005634; GO:0005813; GO:0005829; GO:0005868; GO:0005874; GO:0005886; GO:0005929; GO:0006888; GO:0014069; GO:0016020; GO:0016236; GO:0019886; GO:0030286; GO:0031475; GO:0035735; GO:0042803; GO:0045505; GO:0046982; GO:0051959; GO:0097110; GO:0097542; GO:0098794; GO:0098978; GO:2000582	R-HSA-139910;R-HSA-141444;R-HSA-1632852;R-HSA-2132295;R-HSA-2467813;R-HSA-2500257;R-HSA-3371497;R-HSA-5620924;R-HSA-5663220;R-HSA-6807878;R-HSA-6811436;R-HSA-68877;	hsa:140735;	17.6453	17.6415	17.5809	17.702	17.669	18.6457	18.6348	18.6944	18.5864	18.7314
CCDC79_J3KSG9	-0.874811	-0.890472	-0.996215	-1.08286	-0.874922	1.05453	0.891369	0.856068	0.828671	1.08864	CCDC79	Telomere repeats-binding bouquet formation protein 1	J3KSG9	1.07948	3.14984e-11	7.49871e-08	-1.26756				meiotic attachment of telomere to nuclear envelope [GO:0070197]		cell [GO:0005623]	GO:0005623; GO:0070197			15.9939	15.9834	15.9124	15.8542	15.9938	17.2894	17.1798	17.1561	17.1377	17.3123
MBP_J3KS94	-1.0008	-0.701106	-0.931364	-0.958628	-1.11265	0.893208	0.819219	0.975228	0.88896	1.12792	MBP	Myelin basic protein	J3KS94	1.12435	2.0843e-10	2.50189e-07	-1.73562					structural constituent of myelin sheath [GO:0019911]		GO:0019911			13.9025	14.1789	13.9666	13.9414	13.7994	15.6494	15.5812	15.725	15.6455	15.8659
APOB_P04114	-0.874202	-0.841592	-1.03795	-1.0662	-0.893003	0.91938	0.958976	0.916746	0.769805	1.14804	APOB	Apolipoprotein B-100;Apolipoprotein B-48	P04114	1.03911	2.48167e-10	2.50189e-07	-0.757325	FUNCTION: Apolipoprotein B is a major protein constituent of chylomicrons (apo B-48), LDL (apo B-100) and VLDL (apo B-100). Apo B-100 functions as a recognition signal for the cellular binding and internalization of LDL particles by the apoB/E receptor.	SUBCELLULAR LOCATION: Cytoplasm {ECO:0000269|PubMed:22580899}. Secreted {ECO:0000269|PubMed:22580899, ECO:0000269|PubMed:26224785}.	DISEASE: Hypobetalipoproteinemia, familial, 1 (FHBL1) [MIM:615558]: A disorder of lipid metabolism characterized by less than 5th percentile age- and sex-specific levels of low density lipoproteins, and dietary fat malabsorption. Clinical presentation may vary from no symptoms to severe gastrointestinal and neurological dysfunction similar to abetalipoproteinemia. {ECO:0000269|PubMed:12551903, EC…	artery morphogenesis [GO:0048844]; cellular protein metabolic process [GO:0044267]; cellular response to prostaglandin stimulus [GO:0071379]; cellular response to tumor necrosis factor [GO:0071356]; cholesterol efflux [GO:0033344]; cholesterol homeostasis [GO:0042632]; cholesterol metabolic process [GO:0008203]; cholesterol transport [GO:0030301]; chylomicron assembly [GO:0034378]; chylomicron re…	cholesterol transfer activity [GO:0120020]; heparin binding [GO:0008201]; lipase binding [GO:0035473]; low-density lipoprotein particle receptor binding [GO:0050750]; phospholipid binding [GO:0005543]	chylomicron [GO:0042627]; chylomicron remnant [GO:0034360]; clathrin-coated endocytic vesicle membrane [GO:0030669]; cytoplasm [GO:0005737]; cytosol [GO:0005829]; early endosome [GO:0005769]; endocytic vesicle lumen [GO:0071682]; endoplasmic reticulum exit site [GO:0070971]; endoplasmic reticulum lumen [GO:0005788]; endoplasmic reticulum membrane [GO:0005789]; endosome lumen [GO:0031904]; endosom…	GO:0001523; GO:0001701; GO:0002224; GO:0005543; GO:0005576; GO:0005615; GO:0005737; GO:0005769; GO:0005788; GO:0005789; GO:0005790; GO:0005829; GO:0005886; GO:0006642; GO:0006898; GO:0007283; GO:0007399; GO:0008201; GO:0008203; GO:0009566; GO:0009615; GO:0009743; GO:0009791; GO:0010008; GO:0010269; GO:0010628; GO:0010744; GO:0010884; GO:0010886; GO:0019433; GO:0030301; GO:0030317; GO:0030669; GO:…	R-HSA-202733;R-HSA-3000471;R-HSA-3000480;R-HSA-3000484;R-HSA-3000497;R-HSA-381426;R-HSA-432142;R-HSA-5686938;R-HSA-8856825;R-HSA-8856828;R-HSA-8866423;R-HSA-8957275;R-HSA-8963888;R-HSA-8963901;R-HSA-8964026;R-HSA-8964038;R-HSA-8964041;R-HSA-8964046;R-HSA-975634;	hsa:338;	19.3916	19.4047	19.3258	19.3144	19.384	20.1121	20.128	20.111	20.052	20.204
S100A13_Q99584	-0.903444	-0.813735	-1.05167	-0.993169	-0.953046	1.04129	1.06819	0.934508	0.721355	0.949718	S100A13	Protein S100-A13	Q99584	1.03502	2.79719e-10	2.50189e-07	-0.675621	FUNCTION: Plays a role in the export of proteins that lack a signal peptide and are secreted by an alternative pathway. Binds two calcium ions per subunit. Binds one copper ion. Binding of one copper ion does not interfere with calcium binding. Required for the copper-dependent stress-induced export of IL1A and FGF1. The calcium-free protein binds to lipid vesicles containing phosphatidylserine, …	SUBCELLULAR LOCATION: Cytoplasm. Secreted. Note=Secretion is mediated by exposure to stress and requires copper ions.		cytokine secretion [GO:0050663]; interleukin-1 alpha secretion [GO:0050703]; mast cell degranulation [GO:0043303]; positive regulation of cell population proliferation [GO:0008284]; positive regulation of I-kappaB kinase/NF-kappaB signaling [GO:0043123]; regulation of cell shape [GO:0008360]; response to copper ion [GO:0046688]; response to electrical stimulus [GO:0051602]	calcium ion binding [GO:0005509]; copper ion binding [GO:0005507]; fibroblast growth factor binding [GO:0017134]; lipid binding [GO:0008289]; protein homodimerization activity [GO:0042803]; RAGE receptor binding [GO:0050786]; zinc ion binding [GO:0008270]	cytoplasm [GO:0005737]; cytosol [GO:0005829]; extracellular region [GO:0005576]; extracellular space [GO:0005615]; mast cell granule [GO:0042629]; nucleolus [GO:0005730]; nucleoplasm [GO:0005654]; nucleus [GO:0005634]; perinuclear region of cytoplasm [GO:0048471]; plasma membrane [GO:0005886]	GO:0005507; GO:0005509; GO:0005576; GO:0005615; GO:0005634; GO:0005654; GO:0005730; GO:0005737; GO:0005829; GO:0005886; GO:0008270; GO:0008284; GO:0008289; GO:0008360; GO:0017134; GO:0042629; GO:0042803; GO:0043123; GO:0043303; GO:0046688; GO:0048471; GO:0050663; GO:0050703; GO:0050786; GO:0051602		hsa:6284;	19.3052	19.3373	19.2521	19.273	19.2874	20.0018	20.0114	19.9636	19.8872	19.969
ISG15_P05161	-0.782481	-0.862155	-0.969763	-0.877269	-1.21617	1.01604	0.947935	0.987965	0.81995	0.935948	ISG15	Ubiquitin-like protein ISG15	P05161	1.05356	2.88325e-10	2.50189e-07	-0.915404	FUNCTION: Ubiquitin-like protein which plays a key role in the innate immune response to viral infection either via its conjugation to a target protein (ISGylation) or via its action as a free or unconjugated protein. ISGylation involves a cascade of enzymatic reactions involving E1, E2, and E3 enzymes which catalyze the conjugation of ISG15 to a lysine residue in the target protein. Its target p…	SUBCELLULAR LOCATION: Cytoplasm {ECO:0000269|PubMed:22859821}. Secreted {ECO:0000269|PubMed:22859821}. Note=Exists in three distinct states: free within the cell, released into the extracellular space, or conjugated to target proteins.	DISEASE: Immunodeficiency 38, with basal ganglia calcification (IMD38) [MIM:616126]: A primary immunodeficiency predisposing individuals to severe clinical disease upon infection with weakly virulent mycobacteria, including Mycobacterium bovis Bacille Calmette-Guerin (BCG) vaccines. Patients are also susceptible to Salmonella and Mycobacterium tubercolosis infections. Affected individuals have in…	defense response to bacterium [GO:0042742]; defense response to virus [GO:0051607]; integrin-mediated signaling pathway [GO:0007229]; interferon-gamma secretion [GO:0072643]; interleukin-10 secretion [GO:0072608]; ISG15-protein conjugation [GO:0032020]; modification-dependent protein catabolic process [GO:0019941]; negative regulation of protein ubiquitination [GO:0031397]; negative regulation of…	integrin binding [GO:0005178]; protein tag [GO:0031386]; ubiquitin protein ligase binding [GO:0031625]	cytoplasm [GO:0005737]; cytosol [GO:0005829]; extracellular region [GO:0005576]; nucleoplasm [GO:0005654]; nucleus [GO:0005634]	GO:0005178; GO:0005576; GO:0005634; GO:0005654; GO:0005737; GO:0005829; GO:0007229; GO:0016032; GO:0019941; GO:0019985; GO:0030501; GO:0031386; GO:0031397; GO:0031625; GO:0032020; GO:0032480; GO:0032649; GO:0034340; GO:0042742; GO:0045071; GO:0045648; GO:0051607; GO:0060337; GO:0072608; GO:0072643	R-HSA-1169408;R-HSA-168276;R-HSA-168928;R-HSA-5656169;R-HSA-909733;R-HSA-936440;	hsa:9636;	17.1687	17.13	17.0777	17.1226	16.9579	18.043	18.0099	18.0293	17.9476	18.004
SOD2_P04179	-1.00377	-0.780249	-1.01268	-0.901014	-1.01062	0.8482	0.787669	0.956766	0.932185	1.18352	SOD2	Superoxide dismutase [Mn], mitochondrial	P04179	1.04415	3.1268e-10	2.50189e-07	-0.85556	FUNCTION: Destroys superoxide anion radicals which are normally produced within the cells and which are toxic to biological systems. {ECO:0000269|PubMed:10334867}.	SUBCELLULAR LOCATION: Mitochondrion matrix.	DISEASE: Microvascular complications of diabetes 6 (MVCD6) [MIM:612634]: Pathological conditions that develop in numerous tissues and organs as a consequence of diabetes mellitus. They include diabetic retinopathy, diabetic nephropathy leading to end-stage renal disease, and diabetic neuropathy. Diabetic retinopathy remains the major cause of new-onset blindness among diabetic adults. It is chara…	acetylcholine-mediated vasodilation involved in regulation of systemic arterial blood pressure [GO:0003069]; age-dependent response to reactive oxygen species [GO:0001315]; cellular response to oxidative stress [GO:0034599]; interleukin-12-mediated signaling pathway [GO:0035722]; negative regulation of cell population proliferation [GO:0008285]; negative regulation of neuron apoptotic process [GO…	identical protein binding [GO:0042802]; manganese ion binding [GO:0030145]; metal ion binding [GO:0046872]; superoxide dismutase activity [GO:0004784]	extracellular exosome [GO:0070062]; mitochondrial matrix [GO:0005759]; mitochondrion [GO:0005739]	GO:0000303; GO:0001315; GO:0001836; GO:0003069; GO:0004784; GO:0005739; GO:0005759; GO:0006357; GO:0006801; GO:0008217; GO:0008285; GO:0019430; GO:0030145; GO:0030335; GO:0032364; GO:0034599; GO:0035722; GO:0042802; GO:0043524; GO:0046872; GO:0051289; GO:0070062; GO:1902176; GO:1904706; GO:1905461; GO:1905932	R-HSA-2151201;R-HSA-3299685;R-HSA-8862803;R-HSA-8950505;R-HSA-9615017;	hsa:6648;	19.3515	19.4531	19.3475	19.3982	19.3484	20.1928	20.1653	20.2422	20.231	20.3452
SPANXB1_Q9NS25	0.875576	0.675244	0.939491	1.06908	1.14248	-1.05017	-0.991814	-0.876789	-0.863722	-0.919372	SPANXB1	Sperm protein associated with the nucleus on the X chromosome B/F	Q9NS25	1.07796	3.42783e-10	2.50189e-07	1.3452		SUBCELLULAR LOCATION: Cytoplasm {ECO:0000269|PubMed:10906052}. Nucleus {ECO:0000269|PubMed:10906052}. Note=Associated with nuclear craters.		spermatid development [GO:0007286]		cytoplasm [GO:0005737]; nucleus [GO:0005634]	GO:0005634; GO:0005737; GO:0007286		hsa:728695;	18.553	18.4097	18.5987	18.6914	18.7439	17.1756	17.2173	17.2996	17.3089	17.2691
CD55_H3BLV0	-0.767751	-0.929617	-0.963913	-0.94578	-1.11824	0.890592	0.938566	0.926954	0.976854	0.992337	CD55	Complement decay-accelerating factor	H3BLV0	1.02546	3.50307e-10	2.50189e-07	-0.504339										19.8548	19.8116	19.8025	19.8073	19.7613	20.2973	20.3101	20.307	20.3203	20.3245
SLC16A3_O15427	-0.980589	-0.964535	-0.919494	-0.839505	-1.0064	1.01508	0.960112	1.13018	0.685785	0.919368	SLC16A3	Monocarboxylate transporter 4	O15427	1.03442	5.86189e-10	3.80597e-07	-0.62998	FUNCTION: Proton-linked monocarboxylate transporter. Catalyzes the rapid transport across the plasma membrane of many monocarboxylates such as lactate, pyruvate, branched-chain oxo acids derived from leucine, valine and isoleucine, and the ketone bodies acetoacetate, beta-hydroxybutyrate and acetate (By similarity). {ECO:0000250}.	SUBCELLULAR LOCATION: Cell membrane; Multi-pass membrane protein.		leukocyte migration [GO:0050900]; monocarboxylic acid transport [GO:0015718]; plasma membrane lactate transport [GO:0035879]; pyruvate metabolic process [GO:0006090]	lactate transmembrane transporter activity [GO:0015129]; monocarboxylic acid transmembrane transporter activity [GO:0008028]; RNA binding [GO:0003723]; symporter activity [GO:0015293]	integral component of plasma membrane [GO:0005887]; integral component of postsynaptic density membrane [GO:0099061]; membrane [GO:0016020]; nuclear membrane [GO:0031965]; parallel fiber to Purkinje cell synapse [GO:0098688]; plasma membrane [GO:0005886]	GO:0003723; GO:0005886; GO:0005887; GO:0006090; GO:0008028; GO:0015129; GO:0015293; GO:0015718; GO:0016020; GO:0031965; GO:0035879; GO:0050900; GO:0098688; GO:0099061	R-HSA-210991;R-HSA-433692;R-HSA-70268;	hsa:9123;	18.2917	18.297	18.3121	18.3388	18.283	18.9589	18.9405	18.9974	18.8488	18.9269
UBE2L6_O14933	-0.829053	-1.13859	-0.972189	-0.864336	-0.909075	0.987976	1.10539	0.790031	0.888965	0.940877	UBE2L6	Ubiquitin/ISG15-conjugating enzyme E2 L6	O14933	1.03271	7.66352e-10	4.2646e-07	-0.550405	FUNCTION: Catalyzes the covalent attachment of ubiquitin or ISG15 to other proteins. Functions in the E6/E6-AP-induced ubiquitination of p53/TP53. Promotes ubiquitination and subsequent proteasomal degradation of FLT3. {ECO:0000269|PubMed:15131269, ECO:0000269|PubMed:16428300, ECO:0000269|PubMed:20508617}.			cellular protein metabolic process [GO:0044267]; cellular protein modification process [GO:0006464]; ISG15-protein conjugation [GO:0032020]; negative regulation of type I interferon production [GO:0032480]; translesion synthesis [GO:0019985]; ubiquitin-dependent protein catabolic process [GO:0006511]	ISG15 transferase activity [GO:0042296]; ubiquitin binding [GO:0043130]; ubiquitin conjugating enzyme activity [GO:0061631]; ubiquitin protein ligase binding [GO:0031625]; ubiquitin-protein transferase activity [GO:0004842]	cytosol [GO:0005829]; nucleoplasm [GO:0005654]; ubiquitin ligase complex [GO:0000151]	GO:0000151; GO:0004842; GO:0005654; GO:0005829; GO:0006464; GO:0006511; GO:0019985; GO:0031625; GO:0032020; GO:0032480; GO:0042296; GO:0043130; GO:0044267; GO:0061631	R-HSA-1169408;R-HSA-168928;R-HSA-5656169;R-HSA-936440;R-HSA-977225;R-HSA-983168;	hsa:9246;	16.8587	16.7683	16.8169	16.8484	16.8353	17.3891	17.4234	17.3313	17.3602	17.3754
RAD23B_P54727	-0.951951	-1.0205	-0.840052	-0.718871	-1.17366	0.964329	0.952862	0.981996	0.803654	1.00219	RAD23B	UV excision repair protein RAD23 homolog B	P54727	1.03312	8.54815e-10	4.2646e-07	-0.66089	FUNCTION: Multiubiquitin chain receptor involved in modulation of proteasomal degradation. Binds to polyubiquitin chains. Proposed to be capable to bind simultaneously to the 26S proteasome and to polyubiquitinated substrates and to deliver ubiquitinated proteins to the proteasome. May play a role in endoplasmic reticulum-associated degradation (ERAD) of misfolded glycoproteins by association wit…	SUBCELLULAR LOCATION: Nucleus. Cytoplasm. Note=The intracellular distribution is cell cycle dependent. Localized to the nucleus and the cytoplasm during G1 phase. Nuclear levels decrease during S-phase; upon entering mitosis, relocalizes in the cytoplasm without association with chromatin.		cellular response to interleukin-7 [GO:0098761]; embryonic organ development [GO:0048568]; global genome nucleotide-excision repair [GO:0070911]; nucleotide-excision repair [GO:0006289]; nucleotide-excision repair, DNA damage recognition [GO:0000715]; nucleotide-excision repair, DNA duplex unwinding [GO:0000717]; nucleotide-excision repair, preincision complex assembly [GO:0006294]; proteasome-me…	damaged DNA binding [GO:0003684]; polyubiquitin modification-dependent protein binding [GO:0031593]; proteasome binding [GO:0070628]; RNA polymerase II proximal promoter sequence-specific DNA binding [GO:0000978]; single-stranded DNA binding [GO:0003697]; ubiquitin binding [GO:0043130]	cytosol [GO:0005829]; nucleoplasm [GO:0005654]; nucleus [GO:0005634]; proteasome complex [GO:0000502]; XPC complex [GO:0071942]	GO:0000502; GO:0000715; GO:0000717; GO:0000978; GO:0003684; GO:0003697; GO:0005634; GO:0005654; GO:0005829; GO:0006289; GO:0006294; GO:0006457; GO:0007283; GO:0016579; GO:0031593; GO:0032434; GO:0043130; GO:0043161; GO:0048568; GO:0070628; GO:0070911; GO:0071942; GO:0098761	R-HSA-532668;R-HSA-5689877;R-HSA-5696394;R-HSA-5696395;	hsa:5887;	19.9519	19.9279	19.9912	20.0338	19.8741	20.6249	20.6208	20.6311	20.5684	20.6382
PCYOX1_Q9UHG3	-1.07182	-0.768263	-0.974185	-0.994401	-0.906011	0.973007	0.879515	1.02991	0.770048	1.0622	PCYOX1	Prenylcysteine oxidase 1	Q9UHG3	1.02626	8.71268e-10	4.2646e-07	-0.519724	FUNCTION: Involved in the degradation of prenylated proteins. Cleaves the thioether bond of prenyl-L-cysteines, such as farnesylcysteine and geranylgeranylcysteine.	SUBCELLULAR LOCATION: Lysosome.		prenylated protein catabolic process [GO:0030327]; prenylcysteine catabolic process [GO:0030328]	ATPase-coupled chloride transmembrane transporter activity [GO:0008555]; prenylcysteine oxidase activity [GO:0001735]	extracellular exosome [GO:0070062]; lysosome [GO:0005764]; plasma membrane [GO:0005886]; very-low-density lipoprotein particle [GO:0034361]	GO:0001735; GO:0005764; GO:0005886; GO:0008555; GO:0030327; GO:0030328; GO:0034361; GO:0070062		hsa:51449;	19.7562	19.8399	19.7831	19.7776	19.8019	20.3198	20.294	20.3354	20.2638	20.3443
KCTD14_Q9BQ13	-1.06451	-0.972719	-0.787351	-0.796108	-1.07721	0.841792	0.788073	0.919114	0.966848	1.18207	KCTD14	BTB/POZ domain-containing protein KCTD14	Q9BQ13	1.051	8.95672e-10	4.2646e-07	-0.865764				protein homooligomerization [GO:0051260]			GO:0051260		hsa:65987;	16.9188	16.9611	17.0465	17.0425	16.9129	17.7971	17.7723	17.8327	17.8547	17.9538
MYADM_C9JJV6	0.812689	0.811479	0.944509	0.89378	1.23262	-0.750909	-0.879509	-0.991416	-1.01139	-1.06185	MYADM	Myeloid-associated differentiation marker	C9JJV6	1.05676	1.00147e-09	4.47032e-07	0.953064						integral component of membrane [GO:0016021]	GO:0016021			17.6812	17.6806	17.7481	17.7224	17.8943	16.8877	16.8225	16.7657	16.7555	16.7299
UBE2L3_P68036	-0.99645	-1.16281	-0.71634	-0.839349	-0.989054	0.956561	0.793121	0.989229	1.03585	0.929234	UBE2L3	Ubiquitin-conjugating enzyme E2 L3	P68036	1.0317	1.17195e-09	4.70393e-07	-0.615254	FUNCTION: Ubiquitin-conjugating enzyme E2 that specifically acts with HECT-type and RBR family E3 ubiquitin-protein ligases. Does not function with most RING-containing E3 ubiquitin-protein ligases because it lacks intrinsic E3-independent reactivity with lysine: in contrast, it has activity with the RBR family E3 enzymes, such as PRKN and ARIH1, that function like function like RING-HECT hybrids…	SUBCELLULAR LOCATION: Nucleus {ECO:0000269|PubMed:11278816, ECO:0000269|PubMed:17003263}. Cytoplasm {ECO:0000269|PubMed:11278816, ECO:0000269|PubMed:17003263}.		cell cycle phase transition [GO:0044770]; cell population proliferation [GO:0008283]; cellular protein modification process [GO:0006464]; cellular response to glucocorticoid stimulus [GO:0071385]; cellular response to steroid hormone stimulus [GO:0071383]; positive regulation of protein targeting to mitochondrion [GO:1903955]; positive regulation of protein ubiquitination [GO:0031398]; positive r…	ATP binding [GO:0005524]; enzyme binding [GO:0019899]; RNA binding [GO:0003723]; transcription coactivator activity [GO:0003713]; ubiquitin conjugating enzyme activity [GO:0061631]; ubiquitin protein ligase binding [GO:0031625]; ubiquitin-protein transferase activator activity [GO:0097027]; ubiquitin-protein transferase activity [GO:0004842]	cytoplasm [GO:0005737]; cytosol [GO:0005829]; nucleoplasm [GO:0005654]; nucleus [GO:0005634]; ubiquitin ligase complex [GO:0000151]	GO:0000151; GO:0000209; GO:0003713; GO:0003723; GO:0004842; GO:0005524; GO:0005634; GO:0005654; GO:0005737; GO:0005829; GO:0006355; GO:0006464; GO:0006511; GO:0008283; GO:0016567; GO:0019899; GO:0031398; GO:0031625; GO:0044770; GO:0051443; GO:0061631; GO:0070979; GO:0071383; GO:0071385; GO:0097027; GO:1903955	R-HSA-8866652;R-HSA-8866654;R-HSA-983168;	hsa:7332;	19.3895	19.3352	19.4811	19.4409	19.392	20.0282	19.9747	20.0388	20.0541	20.0192
GSTO1_P78417	-0.87528	-0.899662	-0.873995	-0.989287	-1.059	0.816139	0.862218	0.895042	0.844491	1.27933	GSTO1	Glutathione S-transferase omega-1	P78417	1.0357	1.28588e-09	4.70393e-07	-0.741652	FUNCTION: Exhibits glutathione-dependent thiol transferase and dehydroascorbate reductase activities. Has S-(phenacyl)glutathione reductase activity. Has also glutathione S-transferase activity. Participates in the biotransformation of inorganic arsenic and reduces monomethylarsonic acid (MMA) and dimethylarsonic acid. {ECO:0000269|PubMed:10783391, ECO:0000269|PubMed:11511179, ECO:0000269|PubMed:…	SUBCELLULAR LOCATION: Cytoplasm, cytosol {ECO:0000269|PubMed:11511179}.		cellular response to arsenic-containing substance [GO:0071243]; glutathione derivative biosynthetic process [GO:1901687]; interleukin-12-mediated signaling pathway [GO:0035722]; L-ascorbic acid metabolic process [GO:0019852]; methylation [GO:0032259]; negative regulation of ryanodine-sensitive calcium-release channel activity [GO:0060315]; oxidation-reduction process [GO:0055114]; positive regula…	glutathione dehydrogenase (ascorbate) activity [GO:0045174]; glutathione transferase activity [GO:0004364]; methylarsonate reductase activity [GO:0050610]; oxidoreductase activity [GO:0016491]	cell [GO:0005623]; cytoplasm [GO:0005737]; cytosol [GO:0005829]; extracellular exosome [GO:0070062]; nucleoplasm [GO:0005654]	GO:0004364; GO:0005623; GO:0005654; GO:0005737; GO:0005829; GO:0010880; GO:0010881; GO:0014810; GO:0016491; GO:0019852; GO:0032259; GO:0035722; GO:0042178; GO:0045174; GO:0050610; GO:0055114; GO:0060315; GO:0060316; GO:0070062; GO:0071243; GO:1901687	R-HSA-156581;R-HSA-156590;R-HSA-196836;R-HSA-8950505;	hsa:9446;	20.7978	20.7882	20.7983	20.7528	20.7253	21.4655	21.4837	21.4966	21.4767	21.6483
ARL1_F8VYN9	-1.09825	-0.741535	-0.997994	-0.8833	-0.984244	0.957041	0.869746	1.01265	0.759165	1.10673	ARL1	ADP-ribosylation factor-like protein 1	F8VYN9	1.0323	1.32356e-09	4.70393e-07	-0.574061					GTP binding [GO:0005525]		GO:0005525			17.7221	17.8309	17.7527	17.7877	17.7569	18.349	18.3224	18.366	18.2887	18.3947
PSMA4_P25789	-0.950037	-0.941524	-1.07674	-0.761626	-0.967927	0.780507	0.817707	1.07293	0.852363	1.17435	PSMA4	Proteasome subunit alpha type-4;Proteasome subunit alpha type;Proteasome subunit beta type	P25789	1.03406	1.41604e-09	4.70393e-07	-0.694702	FUNCTION: Component of the 20S core proteasome complex involved in the proteolytic degradation of most intracellular proteins. This complex plays numerous essential roles within the cell by associating with different regulatory particles. Associated with two 19S regulatory particles, forms the 26S proteasome and thus participates in the ATP-dependent degradation of ubiquitinated proteins. The 26S…	SUBCELLULAR LOCATION: Cytoplasm {ECO:0000269|PubMed:12181345}. Nucleus {ECO:0000269|PubMed:12181345}. Note=Colocalizes with TRIM5 in the cytoplasmic bodies. {ECO:0000250|UniProtKB:Q9R1P0}.		anaphase-promoting complex-dependent catabolic process [GO:0031145]; antigen processing and presentation of exogenous peptide antigen via MHC class I, TAP-dependent [GO:0002479]; Fc-epsilon receptor signaling pathway [GO:0038095]; interleukin-1-mediated signaling pathway [GO:0070498]; MAPK cascade [GO:0000165]; negative regulation of canonical Wnt signaling pathway [GO:0090090]; negative regulati…	endopeptidase activity [GO:0004175]; threonine-type endopeptidase activity [GO:0004298]	cytoplasm [GO:0005737]; cytosol [GO:0005829]; extracellular exosome [GO:0070062]; intracellular membrane-bounded organelle [GO:0043231]; nucleoplasm [GO:0005654]; nucleus [GO:0005634]; P-body [GO:0000932]; proteasome complex [GO:0000502]; proteasome core complex [GO:0005839]; proteasome core complex, alpha-subunit complex [GO:0019773]	GO:0000165; GO:0000209; GO:0000502; GO:0000932; GO:0002223; GO:0002479; GO:0004175; GO:0004298; GO:0005634; GO:0005654; GO:0005737; GO:0005829; GO:0005839; GO:0006521; GO:0010498; GO:0010499; GO:0010972; GO:0016032; GO:0016579; GO:0019773; GO:0031145; GO:0031146; GO:0033209; GO:0038061; GO:0038095; GO:0043161; GO:0043231; GO:0043488; GO:0043687; GO:0050852; GO:0055085; GO:0060071; GO:0061418; GO:…	R-HSA-1169091;R-HSA-1234176;R-HSA-1236974;R-HSA-1236978;R-HSA-174084;R-HSA-174113;R-HSA-174154;R-HSA-174178;R-HSA-174184;R-HSA-180534;R-HSA-180585;R-HSA-187577;R-HSA-195253;R-HSA-202424;R-HSA-211733;R-HSA-2467813;R-HSA-2871837;R-HSA-349425;R-HSA-350562;R-HSA-382556;R-HSA-450408;R-HSA-4608870;R-HSA-4641257;R-HSA-4641258;R-HSA-5358346;R-HSA-5362768;R-HSA-5607761;R-HSA-5607764;R-HSA-5610780;R-HSA-56…	hsa:5685;	20.3924	20.3956	20.3456	20.4621	20.3858	21.0322	21.0459	21.1403	21.0588	21.1778
DKFZp686J1372_Q5HYB6	-0.936544	-0.977241	-1.01184	-0.720745	-1.04326	0.921856	0.954753	1.06031	0.637025	1.11569	DKFZp686J1372		Q5HYB6	1.05691	1.43731e-09	4.70393e-07	-1.05022										18.4553	18.4325	18.4131	18.5761	18.3956	19.4957	19.5142	19.5733	19.3363	19.6043
UBASH3B_Q8TF42	-1.00703	-0.843852	-0.964315	-0.907606	-0.979169	0.972104	0.995496	0.979892	0.626166	1.12832	UBASH3B	Ubiquitin-associated and SH3 domain-containing protein B	Q8TF42	1.03156	1.45839e-09	4.70393e-07	-0.606699	FUNCTION: Interferes with CBL-mediated down-regulation and degradation of receptor-type tyrosine kinases. Promotes accumulation of activated target receptors, such as T-cell receptors and EGFR, on the cell surface. Exhibits tyrosine phosphatase activity toward several substrates including EGFR, FAK, SYK, and ZAP70. Down-regulates proteins that are dually modified by both protein tyrosine phosphor…	SUBCELLULAR LOCATION: Cytoplasm {ECO:0000250}. Nucleus {ECO:0000305}.		collagen-activated signaling pathway [GO:0038065]; collagen-activated tyrosine kinase receptor signaling pathway [GO:0038063]; negative regulation of bone resorption [GO:0045779]; negative regulation of osteoclast differentiation [GO:0045671]; negative regulation of platelet aggregation [GO:0090331]; negative regulation of protein kinase activity [GO:0006469]; negative regulation of signal transd…	identical protein binding [GO:0042802]; phosphoprotein binding [GO:0051219]; protein tyrosine phosphatase activity [GO:0004725]; ubiquitin protein ligase binding [GO:0031625]	cytoplasm [GO:0005737]; nucleus [GO:0005634]	GO:0004725; GO:0005634; GO:0005737; GO:0006469; GO:0009968; GO:0031625; GO:0035335; GO:0038063; GO:0038065; GO:0042802; GO:0043393; GO:0045670; GO:0045671; GO:0045779; GO:0051219; GO:0051279; GO:0070527; GO:0090331		hsa:84959;	19.2003	19.2529	19.214	19.2323	19.2093	19.8387	19.8462	19.8412	19.7271	19.8891
VAMP7_P51809	-0.809884	-1.0378	-0.980356	-0.729922	-1.14707	0.893608	0.98449	0.941474	0.829119	1.05634	VAMP7	Vesicle-associated membrane protein 7	P51809	1.03275	1.53859e-09	4.70393e-07	-0.554856	FUNCTION: Involved in the targeting and/or fusion of transport vesicles to their target membrane during transport of proteins from the early endosome to the lysosome. Required for heterotypic fusion of late endosomes with lysosomes and homotypic lysosomal fusion. Required for calcium regulated lysosomal exocytosis. Involved in the export of chylomicrons from the endoplasmic reticulum to the cis G…	SUBCELLULAR LOCATION: Cytoplasmic vesicle, secretory vesicle membrane {ECO:0000250}; Single-pass type IV membrane protein {ECO:0000250}. Golgi apparatus, trans-Golgi network membrane {ECO:0000250}; Single-pass type IV membrane protein {ECO:0000250}. Late endosome membrane {ECO:0000250}; Single-pass type IV membrane protein {ECO:0000250}. Lysosome membrane {ECO:0000269|PubMed:17897319}; Single-pas…		calcium-ion regulated exocytosis [GO:0017156]; endoplasmic reticulum to Golgi vesicle-mediated transport [GO:0006888]; endosome to lysosome transport [GO:0008333]; eosinophil degranulation [GO:0043308]; exocytosis [GO:0006887]; Golgi to plasma membrane protein transport [GO:0043001]; membrane organization [GO:0061024]; natural killer cell degranulation [GO:0043320]; neutrophil degranulation [GO:0…	SNAP receptor activity [GO:0005484]; SNARE binding [GO:0000149]; syntaxin binding [GO:0019905]	apical part of cell [GO:0045177]; azurophil granule membrane [GO:0035577]; cell [GO:0005623]; cell junction [GO:0030054]; cell surface [GO:0009986]; clathrin-coated vesicle membrane [GO:0030665]; cytoplasm [GO:0005737]; endoplasmic reticulum membrane [GO:0005789]; extracellular exosome [GO:0070062]; hippocampal mossy fiber to CA3 synapse [GO:0098686]; integral component of synaptic vesicle membra…	GO:0000149; GO:0005484; GO:0005623; GO:0005737; GO:0005765; GO:0005789; GO:0005802; GO:0005886; GO:0006887; GO:0006888; GO:0006892; GO:0006906; GO:0006911; GO:0008333; GO:0009986; GO:0016020; GO:0016192; GO:0017156; GO:0019905; GO:0030027; GO:0030054; GO:0030141; GO:0030285; GO:0030665; GO:0030667; GO:0030670; GO:0031091; GO:0031143; GO:0031201; GO:0031902; GO:0034197; GO:0035493; GO:0035577; GO:…	R-HSA-199992;R-HSA-432720;R-HSA-432722;R-HSA-8856825;R-HSA-8856828;R-HSA-9020591;	hsa:6845;	16.979	16.9118	16.9287	17.0025	16.8796	17.4812	17.508	17.4953	17.4622	17.5292
COX7A2_D6RIE3	-1.0765	-0.980685	-0.888011	-0.778059	-0.975293	0.779374	0.982611	1.04233	0.746109	1.14812	COX7A2	Cytochrome c oxidase subunit 7A2, mitochondrial	D6RIE3	1.03808	1.65586e-09	4.70393e-07	-0.639828					cytochrome-c oxidase activity [GO:0004129]	mitochondrial respirasome [GO:0005746]	GO:0004129; GO:0005746			16.7576	16.7902	16.8218	16.8592	16.792	17.3894	17.4586	17.4789	17.3781	17.5149
CAST_F8W7E0	-0.912522	-0.858788	-1.21118	-0.80265	-0.900874	0.664814	0.898311	1.02912	0.987538	1.10623	CAST		F8W7E0	1.09219	1.67524e-09	4.70393e-07	-1.24401						cytosol [GO:0005829]; endoplasmic reticulum [GO:0005783]	GO:0005783; GO:0005829			13.511	13.5466	13.3127	13.5839	13.5187	14.5578	14.7128	14.7996	14.772	14.8508
HYOU1_Q9Y4L1	-0.958444	-0.976587	-0.853012	-0.842352	-1.09095	0.864842	0.880958	0.878935	0.99432	1.1023	HYOU1	Hypoxia up-regulated protein 1	Q9Y4L1	1.01838	1.72961e-09	4.70393e-07	-0.415653	FUNCTION: Has a pivotal role in cytoprotective cellular mechanisms triggered by oxygen deprivation. May play a role as a molecular chaperone and participate in protein folding. {ECO:0000269|PubMed:10037731}.	SUBCELLULAR LOCATION: Endoplasmic reticulum lumen.	DISEASE: Immunodeficiency 59 and hypoglycemia (IMD59) [MIM:233600]: An autosomal recessive primary immunologic disorder characterized by combined immunodeficiency, granulocytopenia, B-cell and dendritic cell deficiency, recurrent septic infections of the respiratory tract, skin and mucous membranes, and disturbed glucose metabolism. {ECO:0000269|PubMed:27913302}. Note=The disease may be caused by…	cellular response to hypoxia [GO:0071456]; endoplasmic reticulum to Golgi vesicle-mediated transport [GO:0006888]; IRE1-mediated unfolded protein response [GO:0036498]; negative regulation of endoplasmic reticulum stress-induced neuron intrinsic apoptotic signaling pathway [GO:1903382]; negative regulation of hypoxia-induced intrinsic apoptotic signaling pathway [GO:1903298]; receptor-mediated en…	ATP binding [GO:0005524]; chaperone binding [GO:0051087]	endocytic vesicle lumen [GO:0071682]; endoplasmic reticulum [GO:0005783]; endoplasmic reticulum chaperone complex [GO:0034663]; endoplasmic reticulum lumen [GO:0005788]; extracellular exosome [GO:0070062]; extracellular region [GO:0005576]; focal adhesion [GO:0005925]; membrane [GO:0016020]; smooth endoplasmic reticulum [GO:0005790]	GO:0002931; GO:0005524; GO:0005576; GO:0005783; GO:0005788; GO:0005790; GO:0005925; GO:0006888; GO:0006898; GO:0016020; GO:0034663; GO:0034976; GO:0036498; GO:0051087; GO:0070062; GO:0071456; GO:0071682; GO:1903298; GO:1903382	R-HSA-3000484;R-HSA-381038;	hsa:10525;	22.6062	22.6022	22.6294	22.6317	22.577	23.0075	23.011	23.0106	23.036	23.0597
SDHC_Q99643	-0.839214	-1.02365	-0.894986	-0.726266	-1.19852	0.985997	0.749453	0.961077	0.830138	1.15597	SDHC	Succinate dehydrogenase cytochrome b560 subunit, mitochondrial	Q99643	1.15634	1.7783e-09	4.70393e-07	-1.96086	FUNCTION: Membrane-anchoring subunit of succinate dehydrogenase (SDH) that is involved in complex II of the mitochondrial electron transport chain and is responsible for transferring electrons from succinate to ubiquinone (coenzyme Q).	SUBCELLULAR LOCATION: Mitochondrion inner membrane; Multi-pass membrane protein.	DISEASE: Paragangliomas 3 (PGL3) [MIM:605373]: A neural crest tumor usually derived from the chromoreceptor tissue of a paraganglion. Paragangliomas can develop at various body sites, including the head, neck, thorax and abdomen. Most commonly, they are located in the head and neck region, specifically at the carotid bifurcation, the jugular foramen, the vagal nerve, and in the middle ear. {ECO:0…	aerobic respiration [GO:0009060]; mitochondrial electron transport, succinate to ubiquinone [GO:0006121]; oxidation-reduction process [GO:0055114]; tricarboxylic acid cycle [GO:0006099]	electron transfer activity [GO:0009055]; heme binding [GO:0020037]; metal ion binding [GO:0046872]; succinate dehydrogenase activity [GO:0000104]	integral component of membrane [GO:0016021]; mitochondrial inner membrane [GO:0005743]; mitochondrial respiratory chain complex II, succinate dehydrogenase complex (ubiquinone) [GO:0005749]; mitochondrion [GO:0005739]; respiratory chain complex II [GO:0045273]	GO:0000104; GO:0005739; GO:0005743; GO:0005749; GO:0006099; GO:0006121; GO:0009055; GO:0009060; GO:0016021; GO:0020037; GO:0045273; GO:0046872; GO:0055114	R-HSA-611105;R-HSA-71403;	hsa:6391;	12.6442	12.4511	12.5858	12.7624	12.268	14.5549	14.3073	14.5288	14.3918	14.7329
ITGA2_P17301	-0.885121	-0.936688	-0.940593	-0.881499	-1.05707	0.897882	0.790609	0.83159	0.918594	1.2623	ITGA2	Integrin alpha-2	P17301	1.02765	1.89658e-09	4.83763e-07	-0.574038	FUNCTION: Integrin alpha-2/beta-1 is a receptor for laminin, collagen, collagen C-propeptides, fibronectin and E-cadherin. It recognizes the proline-hydroxylated sequence G-F-P-G-E-R in collagen. It is responsible for adhesion of platelets and other cells to collagens, modulation of collagen and collagenase gene expression, force generation and organization of newly synthesized extracellular matr…	SUBCELLULAR LOCATION: Membrane; Single-pass type I membrane protein.		animal organ morphogenesis [GO:0009887]; blood coagulation [GO:0007596]; cell adhesion [GO:0007155]; cell adhesion mediated by integrin [GO:0033627]; cell-matrix adhesion [GO:0007160]; cell population proliferation [GO:0008283]; cell-substrate adhesion [GO:0031589]; cellular response to estradiol stimulus [GO:0071392]; cellular response to mechanical stimulus [GO:0071260]; collagen-activated sign…	amyloid-beta binding [GO:0001540]; collagen binding [GO:0005518]; collagen binding involved in cell-matrix adhesion [GO:0098639]; collagen receptor activity [GO:0038064]; heparan sulfate proteoglycan binding [GO:0043395]; integrin binding [GO:0005178]; laminin binding [GO:0043236]; metal ion binding [GO:0046872]; protein-containing complex binding [GO:0044877]; protein heterodimerization activity…	axon terminus [GO:0043679]; basal part of cell [GO:0045178]; cell surface [GO:0009986]; external side of plasma membrane [GO:0009897]; focal adhesion [GO:0005925]; integrin alpha2-beta1 complex [GO:0034666]; integrin complex [GO:0008305]; nucleus [GO:0005634]; perinuclear region of cytoplasm [GO:0048471]; plasma membrane [GO:0005886]	GO:0001540; GO:0001618; GO:0001666; GO:0002687; GO:0005178; GO:0005518; GO:0005634; GO:0005886; GO:0005925; GO:0006929; GO:0006971; GO:0007155; GO:0007160; GO:0007229; GO:0007565; GO:0007596; GO:0008283; GO:0008305; GO:0009887; GO:0009897; GO:0009986; GO:0010634; GO:0010694; GO:0014075; GO:0014850; GO:0014911; GO:0030198; GO:0030879; GO:0031346; GO:0031589; GO:0032967; GO:0033343; GO:0033591; GO:…	R-HSA-216083;R-HSA-3000157;R-HSA-3000170;R-HSA-3000178;R-HSA-447041;R-HSA-75892;R-HSA-8874081;	hsa:3673;	20.7788	20.7631	20.7619	20.7799	20.7263	21.3231	21.2904	21.3029	21.3294	21.4344
CARD16_E9PQW1	-0.781475	-0.966929	-1.12278	-0.961525	-0.852648	1.08418	0.953596	0.873218	0.64153	1.13284	CARD16	Caspase;Caspase recruitment domain-containing protein 16;Caspase-1;Caspase-1 subunit p20;Caspase-1 subunit p10	E9PQW1	1.06333	2.26125e-09	5.25269e-07	-0.955499				regulation of apoptotic process [GO:0042981]			GO:0042981			15.1679	15.0734	14.9939	15.0761	15.1316	16.1191	16.0525	16.0115	15.8934	16.1439
PGM1_P36871	-0.863344	-1.00244	-0.994458	-0.756222	-1.07364	0.786163	0.894221	0.8922	0.858036	1.25948	PGM1	Phosphoglucomutase-1	P36871	1.03539	2.30408e-09	5.25269e-07	-0.741109	FUNCTION: This enzyme participates in both the breakdown and synthesis of glucose.	SUBCELLULAR LOCATION: Isoform 1: Cytoplasm.	DISEASE: Congenital disorder of glycosylation 1T (CDG1T) [MIM:614921]: A form of congenital disorder of glycosylation, a multisystem disorder caused by a defect in glycoprotein biosynthesis and characterized by under-glycosylated serum glycoproteins. Congenital disorders of glycosylation result in a wide variety of clinical features, such as defects in the nervous system development, psychomotor …	galactose catabolic process [GO:0019388]; gluconeogenesis [GO:0006094]; glucose metabolic process [GO:0006006]; glycogen biosynthetic process [GO:0005978]; glycogen catabolic process [GO:0005980]; glycolytic process [GO:0006096]; neutrophil degranulation [GO:0043312]	magnesium ion binding [GO:0000287]; phosphoglucomutase activity [GO:0004614]	cytoplasm [GO:0005737]; cytosol [GO:0005829]; extracellular exosome [GO:0070062]; extracellular region [GO:0005576]; ficolin-1-rich granule lumen [GO:1904813]; tertiary granule lumen [GO:1904724]	GO:0000287; GO:0004614; GO:0005576; GO:0005737; GO:0005829; GO:0005978; GO:0005980; GO:0006006; GO:0006094; GO:0006096; GO:0019388; GO:0043312; GO:0070062; GO:1904724; GO:1904813	R-HSA-3322077;R-HSA-5609974;R-HSA-6798695;	hsa:5236;	20.9694	20.9144	20.9176	21.0117	20.8863	21.621	21.6637	21.6629	21.6494	21.808
ALKBH8_Q96BT7	-0.754147	-1.08946	-0.912412	-0.929653	-1.00217	0.909534	0.95048	0.910071	0.689216	1.22855	ALKBH8	Alkylated DNA repair protein alkB homolog 8	Q96BT7	1.05124	2.33138e-09	5.25269e-07	-0.812478	FUNCTION: Catalyzes the methylation of 5-carboxymethyl uridine to 5-methylcarboxymethyl uridine at the wobble position of the anticodon loop in tRNA via its methyltransferase domain (PubMed:20123966, PubMed:20308323). Catalyzes the last step in the formation of 5-methylcarboxymethyl uridine at the wobble position of the anticodon loop in target tRNA (PubMed:20123966, PubMed:20308323). Has a prefe…	SUBCELLULAR LOCATION: Cytoplasm {ECO:0000269|PubMed:17979886, ECO:0000269|PubMed:20308323}. Nucleus {ECO:0000269|PubMed:20308323}. Note=Predominantly cytoplasmic. {ECO:0000269|PubMed:20308323}.		cellular response to DNA damage stimulus [GO:0006974]; oxidation-reduction process [GO:0055114]; tRNA methylation [GO:0030488]; tRNA wobble uridine modification [GO:0002098]	2-oxoglutarate-dependent dioxygenase activity [GO:0016706]; iron ion binding [GO:0005506]; tRNA (uracil) methyltransferase activity [GO:0016300]; tRNA binding [GO:0000049]; zinc ion binding [GO:0008270]	cytosol [GO:0005829]; nuclear body [GO:0016604]; nucleoplasm [GO:0005654]; nucleus [GO:0005634]	GO:0000049; GO:0002098; GO:0005506; GO:0005634; GO:0005654; GO:0005829; GO:0006974; GO:0008270; GO:0016300; GO:0016604; GO:0016706; GO:0030488; GO:0055114	R-HSA-6782315;	hsa:91801;	15.9362	15.7909	15.8676	15.8601	15.8287	16.657	16.6748	16.6573	16.5616	16.7952
STT3A_P46977	-1.00243	-0.681154	-0.963591	-1.17201	-0.872733	0.833027	0.838913	1.10422	0.87041	1.04535	STT3A	Dolichyl-diphosphooligosaccharide--protein glycosyltransferase subunit STT3A	P46977	1.03602	2.35349e-09	5.25269e-07	-0.686142	FUNCTION: Catalytic subunit of the oligosaccharyl transferase (OST) complex that catalyzes the initial transfer of a defined glycan (Glc(3)Man(9)GlcNAc(2) in eukaryotes) from the lipid carrier dolichol-pyrophosphate to an asparagine residue within an Asn-X-Ser/Thr consensus motif in nascent polypeptide chains, the first step in protein N-glycosylation. N-glycosylation occurs cotranslationally and…	SUBCELLULAR LOCATION: Endoplasmic reticulum {ECO:0000269|PubMed:12887896}. Endoplasmic reticulum membrane {ECO:0000250|UniProtKB:P46978}; Multi-pass membrane protein {ECO:0000250|UniProtKB:P46978}.	DISEASE: Congenital disorder of glycosylation 1W (CDG1W) [MIM:615596]: A form of congenital disorder of glycosylation, a multisystem disorder caused by a defect in glycoprotein biosynthesis and characterized by under-glycosylated serum glycoproteins. Congenital disorders of glycosylation result in a wide variety of clinical features, such as defects in the nervous system development, psychomotor …	co-translational protein modification [GO:0043686]; post-translational protein modification [GO:0043687]; protein N-linked glycosylation via asparagine [GO:0018279]	dolichyl-diphosphooligosaccharide-protein glycotransferase activity [GO:0004579]; metal ion binding [GO:0046872]	endoplasmic reticulum membrane [GO:0005789]; integral component of membrane [GO:0016021]; membrane [GO:0016020]; oligosaccharyltransferase complex [GO:0008250]; oligosaccharyltransferase III complex [GO:0035000]	GO:0004579; GO:0005789; GO:0008250; GO:0016020; GO:0016021; GO:0018279; GO:0035000; GO:0043686; GO:0043687; GO:0046872	R-HSA-446203;	hsa:3703;	19.0252	19.1427	19.0394	18.9632	19.0726	19.6962	19.6984	19.7954	19.7099	19.7739
PRPS2_P11908	-0.889463	-0.936311	-1.05824	-0.838874	-0.977922	0.920244	0.792465	1.01677	0.761454	1.20987	PRPS2	Ribose-phosphate pyrophosphokinase 2	P11908	1.02609	2.50582e-09	5.28144e-07	-0.532391	FUNCTION: Catalyzes the synthesis of phosphoribosylpyrophosphate (PRPP) that is essential for nucleotide synthesis.			5-phosphoribose 1-diphosphate biosynthetic process [GO:0006015]; AMP biosynthetic process [GO:0006167]; animal organ regeneration [GO:0031100]; nucleobase-containing compound metabolic process [GO:0006139]; nucleoside metabolic process [GO:0009116]; nucleotide biosynthetic process [GO:0009165]; purine nucleotide biosynthetic process [GO:0006164]	ADP binding [GO:0043531]; AMP binding [GO:0016208]; ATP binding [GO:0005524]; carbohydrate binding [GO:0030246]; GDP binding [GO:0019003]; identical protein binding [GO:0042802]; kinase activity [GO:0016301]; magnesium ion binding [GO:0000287]; protein homodimerization activity [GO:0042803]; ribose phosphate diphosphokinase activity [GO:0004749]	cytoplasm [GO:0005737]; ribose phosphate diphosphokinase complex [GO:0002189]	GO:0000287; GO:0002189; GO:0004749; GO:0005524; GO:0005737; GO:0006015; GO:0006139; GO:0006164; GO:0006167; GO:0009116; GO:0009165; GO:0016208; GO:0016301; GO:0019003; GO:0030246; GO:0031100; GO:0042802; GO:0042803; GO:0043531	R-HSA-73843;	hsa:5634;	20.4173	20.404	20.3695	20.4316	20.3922	20.9297	20.8935	20.957	20.8847	21.0117
ABRACL_Q9P1F3	-0.881757	-1.01692	-1.09606	-0.61388	-1.07757	1.08119	0.772552	1.0159	0.883378	0.933175	ABRACL	Costars family protein ABRACL	Q9P1F3	1.05418	2.61172e-09	5.28144e-07	-0.819148				regulation of actin filament-based process [GO:0032970]			GO:0032970		hsa:58527;	15.143	15.0839	15.0493	15.26	15.0574	16.0008	15.8659	15.9722	15.9143	15.9361
PLAT_B4DNJ1	-0.824162	-0.992327	-1.01676	-0.969216	-0.888141	0.814842	0.689623	0.910143	1.04834	1.22766	PLAT	Tissue-type plasminogen activator;Tissue-type plasminogen activator chain A;Tissue-type plasminogen activator chain B	B4DNJ1	1.03856	2.63681e-09	5.28144e-07	-0.681894				plasminogen activation [GO:0031639]; smooth muscle cell migration [GO:0014909]	serine-type endopeptidase activity [GO:0004252]	extracellular region [GO:0005576]	GO:0004252; GO:0005576; GO:0014909; GO:0031639			17.7263	17.6652	17.6563	17.6736	17.7031	18.322	18.2765	18.3566	18.4069	18.472
NPC1_O15118	-0.967563	-0.973562	-1.03603	-0.902824	-0.831317	0.910187	0.780111	0.978473	0.853784	1.18874	NPC1	Niemann-Pick C1 protein	O15118	1.02304	2.77794e-09	5.28144e-07	-0.437088	FUNCTION: Intracellular cholesterol transporter which acts in concert with NPC2 and plays an important role in the egress of cholesterol from the endosomal/lysosomal compartment (PubMed:9211849, PubMed:9927649, PubMed:10821832, PubMed:18772377, PubMed:27238017, PubMed:12554680). Unesterified cholesterol that has been released from LDLs in the lumen of the late endosomes/lysosomes is transferred b…	SUBCELLULAR LOCATION: Late endosome membrane {ECO:0000269|PubMed:12554680}; Multi-pass membrane protein {ECO:0000269|PubMed:10821832, ECO:0000269|PubMed:27238017, ECO:0000269|PubMed:28784760}. Lysosome membrane {ECO:0000269|PubMed:17897319, ECO:0000269|PubMed:9927649}; Multi-pass membrane protein {ECO:0000269|PubMed:10821832, ECO:0000269|PubMed:27238017, ECO:0000269|PubMed:28784760}.	DISEASE: Niemann-Pick disease C1 (NPC1) [MIM:257220]: A lysosomal storage disorder that affects the viscera and the central nervous system. It is due to defective intracellular processing and transport of low-density lipoprotein derived cholesterol. It causes accumulation of cholesterol in lysosomes, with delayed induction of cholesterol homeostatic reactions. Niemann-Pick disease type C1 has a h…	adult walking behavior [GO:0007628]; autophagy [GO:0006914]; bile acid metabolic process [GO:0008206]; cellular response to low-density lipoprotein particle stimulus [GO:0071404]; cellular response to steroid hormone stimulus [GO:0071383]; cholesterol efflux [GO:0033344]; cholesterol homeostasis [GO:0042632]; cholesterol metabolic process [GO:0008203]; cholesterol transport [GO:0030301]; endocyto…	cholesterol binding [GO:0015485]; signaling receptor activity [GO:0038023]; sterol transporter activity [GO:0015248]; transmembrane signaling receptor activity [GO:0004888]; virus receptor activity [GO:0001618]	endoplasmic reticulum [GO:0005783]; extracellular exosome [GO:0070062]; extracellular region [GO:0005576]; Golgi apparatus [GO:0005794]; integral component of lysosomal membrane [GO:1905103]; integral component of membrane [GO:0016021]; integral component of plasma membrane [GO:0005887]; late endosome membrane [GO:0031902]; lysosomal membrane [GO:0005765]; lysosome [GO:0005764]; membrane [GO:0016…	GO:0001618; GO:0004888; GO:0005576; GO:0005635; GO:0005764; GO:0005765; GO:0005783; GO:0005794; GO:0005887; GO:0006486; GO:0006897; GO:0006914; GO:0007041; GO:0007628; GO:0008203; GO:0008206; GO:0015248; GO:0015485; GO:0016020; GO:0016021; GO:0016242; GO:0030301; GO:0031579; GO:0031902; GO:0032367; GO:0033344; GO:0034383; GO:0038023; GO:0042493; GO:0042632; GO:0045121; GO:0046686; GO:0046718; GO:…	R-HSA-8964038;	hsa:4864;	18.9666	18.9652	18.9507	18.9816	18.9982	19.4021	19.3719	19.4179	19.389	19.4667
SLC29A1_Q99808	-1.05034	-0.989551	-1.00877	-0.605628	-1.03073	0.966997	0.859436	1.05383	0.73218	1.07257	SLC29A1	Equilibrative nucleoside transporter 1	Q99808	1.04651	2.80663e-09	5.28144e-07	-0.827749	FUNCTION: Mediates both influx and efflux of nucleosides across the membrane (equilibrative transporter). It is sensitive (ES) to low concentrations of the inhibitor nitrobenzylmercaptopurine riboside (NBMPR) and is sodium-independent. It has a higher affinity for adenosine. Inhibited by dipyridamole and dilazep (anticancer chemotherapeutics drugs).	SUBCELLULAR LOCATION: Basolateral cell membrane; Multi-pass membrane protein. Apical cell membrane; Multi-pass membrane protein. Cell membrane; Multi-pass membrane protein. Note=Predominantly localized in the basolateral membrane in polarized MDCK cells.		cellular response to glucose stimulus [GO:0071333]; cellular response to hypoxia [GO:0071456]; excitatory postsynaptic potential [GO:0060079]; lactation [GO:0007595]; neurotransmitter reuptake [GO:0098810]; nucleobase-containing compound metabolic process [GO:0006139]; nucleoside transport [GO:0015858]; sleep [GO:0030431]; uridine transport [GO:0015862]	nucleoside transmembrane transporter activity [GO:0005337]	apical plasma membrane [GO:0016324]; basolateral plasma membrane [GO:0016323]; cell [GO:0005623]; integral component of plasma membrane [GO:0005887]; membrane [GO:0016020]; plasma membrane [GO:0005886]; postsynapse [GO:0098794]; presynapse [GO:0098793]	GO:0005337; GO:0005623; GO:0005886; GO:0005887; GO:0006139; GO:0007595; GO:0015858; GO:0015862; GO:0016020; GO:0016323; GO:0016324; GO:0030431; GO:0060079; GO:0071333; GO:0071456; GO:0098793; GO:0098794; GO:0098810	R-HSA-83936;	hsa:2030;	17.7456	17.7724	17.764	17.942	17.7543	18.6366	18.5891	18.675	18.5329	18.6833
CEP290_J3KNF5	-1.11331	-0.661283	-0.85974	-0.961377	-1.08055	1.07408	0.93516	1.10612	0.674618	0.88627	CEP290	Centrosomal protein of 290 kDa	J3KNF5	1.19027	2.81006e-09	5.28144e-07	-2.34344				cilium assembly [GO:0060271]		centrosome [GO:0005813]; nucleus [GO:0005634]	GO:0005634; GO:0005813; GO:0060271			12.0932	12.6595	12.4109	12.2835	12.1342	14.8336	14.6596	14.8738	14.3332	14.5983
HABP2_Q14520	-0.867208	-1.03923	-0.825268	-1.00314	-0.9591	0.83889	1.06157	1.03688	0.641578	1.11504	HABP2	Hyaluronan-binding protein 2;Hyaluronan-binding protein 2 50 kDa heavy chain;Hyaluronan-binding protein 2 50 kDa heavy chain alternate form;Hyaluronan-binding protein 2 27 kDa light chain;Hyaluronan-binding protein 2 27 kDa light chain alternate form	Q14520	1.03666	2.90863e-09	5.2903e-07	-0.594734	FUNCTION: Cleaves the alpha-chain at multiple sites and the beta-chain between 'Lys-53' and 'Lys-54' but not the gamma-chain of fibrinogen and therefore does not initiate the formation of the fibrin clot and does not cause the fibrinolysis directly. It does not cleave (activate) prothrombin and plasminogen but converts the inactive single chain urinary plasminogen activator (pro-urokinase) to the…	SUBCELLULAR LOCATION: Secreted {ECO:0000269|PubMed:8827452}. Note=Secreted as an inactive single-chain precursor and is then activated to a heterodimeric form.	DISEASE: Thyroid cancer, non-medullary, 5 (NMTC5) [MIM:616535]: A form of non-medullary thyroid cancer (NMTC), a cancer characterized by tumors originating from the thyroid follicular cells. NMTCs represent approximately 95% of all cases of thyroid cancer and are classified into papillary, follicular, Hurthle cell, and anaplastic neoplasms. {ECO:0000269|PubMed:12578864, ECO:0000269|PubMed:2622256…	cell adhesion [GO:0007155]; proteolysis [GO:0006508]	calcium ion binding [GO:0005509]; glycosaminoglycan binding [GO:0005539]; serine-type endopeptidase activity [GO:0004252]	extracellular region [GO:0005576]; extracellular space [GO:0005615]	GO:0004252; GO:0005509; GO:0005539; GO:0005576; GO:0005615; GO:0006508; GO:0007155		hsa:3026;	16.2475	16.193	16.2607	16.2044	16.2183	16.7879	16.8584	16.8506	16.7254	16.8753
CLUH_K7EIG1	-1.04585	-0.947906	-0.966315	-0.674422	-1.04232	0.895233	0.851086	0.948899	0.72333	1.25826	CLUH		K7EIG1	1.12431	2.96292e-09	5.2903e-07	-1.64828	FUNCTION: mRNA-binding protein involved in proper cytoplasmic distribution of mitochondria. {ECO:0000256|SAAS:SAAS00983568}.	SUBCELLULAR LOCATION: Cytoplasm {ECO:0000256|SAAS:SAAS00983567}.		intracellular distribution of mitochondria [GO:0048312]		cytoplasm [GO:0005737]	GO:0005737; GO:0048312			13.1624	13.2487	13.2324	13.4896	13.1655	14.8726	14.8337	14.9199	14.7212	15.1925
TNIK_Q9UKE5	-0.784962	-0.891669	-0.748439	-1.13035	-1.12699	0.763736	0.834541	1.16133	0.918155	1.00465	TNIK	TRAF2 and NCK-interacting protein kinase	Q9UKE5	1.05812	3.1374e-09	5.46511e-07	-0.876608	FUNCTION: Serine/threonine kinase that acts as an essential activator of the Wnt signaling pathway. Recruited to promoters of Wnt target genes and required to activate their expression. May act by phosphorylating TCF4/TCF7L2. Appears to act upstream of the JUN N-terminal pathway. May play a role in the response to environmental stress. Part of a signaling complex composed of NEDD4, RAP2A and TNIK…	SUBCELLULAR LOCATION: Nucleus. Cytoplasm. Recycling endosome. Cytoplasm, cytoskeleton. Note=Associated with recycling endosomes and the cytoskeletal fraction upon RAP2A overexpression.	DISEASE: Mental retardation, autosomal recessive 54 (MRT54) [MIM:617028]: A form of mental retardation, a disorder characterized by significantly below average general intellectual functioning associated with impairments in adaptive behavior and manifested during the developmental period. MRT54 patients manifest intellectual disability, delayed speech and hyperactivity. {ECO:0000269|PubMed:271065…	actin cytoskeleton reorganization [GO:0031532]; activation of JNKK activity [GO:0007256]; activation of protein kinase activity [GO:0032147]; cytoskeleton organization [GO:0007010]; intracellular signal transduction [GO:0035556]; microvillus assembly [GO:0030033]; neuron projection morphogenesis [GO:0048812]; positive regulation of protein phosphorylation [GO:0001934]; protein autophosphorylation…	ATP binding [GO:0005524]; protein kinase activity [GO:0004672]; protein serine/threonine kinase activity [GO:0004674]	apical plasma membrane [GO:0016324]; cytoplasm [GO:0005737]; cytoskeleton [GO:0005856]; cytosol [GO:0005829]; extracellular exosome [GO:0070062]; glutamatergic synapse [GO:0098978]; nucleoplasm [GO:0005654]; nucleus [GO:0005634]; postsynaptic density, intracellular component [GO:0099092]; presynapse [GO:0098793]; recycling endosome [GO:0055037]	GO:0001934; GO:0004672; GO:0004674; GO:0005524; GO:0005634; GO:0005654; GO:0005737; GO:0005829; GO:0005856; GO:0006468; GO:0007010; GO:0007256; GO:0016055; GO:0016324; GO:0023014; GO:0030033; GO:0031532; GO:0032147; GO:0035556; GO:0046777; GO:0048812; GO:0048814; GO:0055037; GO:0070062; GO:0072659; GO:0098793; GO:0098978; GO:0099092	R-HSA-2559580;	hsa:23043;	15.1535	15.1035	15.1705	14.9918	14.9934	15.8783	15.9114	16.0644	15.9506	15.9911
RSU1_Q15404	-1.05819	-0.909445	-0.770387	-0.99588	-0.960838	0.800664	0.888554	1.04661	0.755856	1.20306	RSU1	Ras suppressor protein 1	Q15404	1.03008	3.23893e-09	5.46511e-07	-0.562883	FUNCTION: Potentially plays a role in the Ras signal transduction pathway. Capable of suppressing v-Ras transformation in vitro.			positive regulation of cell-substrate adhesion [GO:0010811]; positive regulation of GTPase activity [GO:0043547]; signal transduction [GO:0007165]		cytosol [GO:0005829]; extracellular exosome [GO:0070062]; focal adhesion [GO:0005925]	GO:0005829; GO:0005925; GO:0007165; GO:0010811; GO:0043547; GO:0070062	R-HSA-446388;	hsa:6251;	18.6767	18.7213	18.763	18.6954	18.7059	19.2339	19.2602	19.3076	19.2205	19.3545
USE1_G8JLK1	-0.881548	-0.887565	-0.813613	-0.904861	-1.21551	0.940242	0.801021	0.889714	0.956177	1.11595	USE1	Vesicle transport protein USE1	G8JLK1	1.02877	3.36957e-09	5.46511e-07	-0.474442						integral component of membrane [GO:0016021]	GO:0016021			16.503	16.5014	16.5201	16.4971	16.4187	16.9624	16.9273	16.9497	16.9664	17.0067
ABCF1_Q5STZ8	-0.792855	-1.07371	-0.785097	-0.837652	-1.18899	0.926914	0.826542	1.14391	0.732228	1.04871	ABCF1		Q5STZ8	1.06577	3.37748e-09	5.46511e-07	-1.08585						cytosol [GO:0005829]	GO:0005829			16.5923	16.4294	16.5968	16.5663	16.3625	17.5902	17.532	17.7161	17.4773	17.6609
TNFRSF21_O75509	-1.00701	-0.857495	-0.851092	-0.924905	-1.06325	0.77185	0.948418	0.878543	0.882347	1.22259	TNFRSF21	Tumor necrosis factor receptor superfamily member 21	O75509	1.02593	3.51978e-09	5.46511e-07	-0.465022	FUNCTION: Promotes apoptosis, possibly via a pathway that involves the activation of NF-kappa-B. Can also promote apoptosis mediated by BAX and by the release of cytochrome c from the mitochondria into the cytoplasm. Plays a role in neuronal apoptosis, including apoptosis in response to amyloid peptides derived from APP, and is required for both normal cell body death and axonal pruning. Trophic-…	SUBCELLULAR LOCATION: Cell membrane {ECO:0000269|PubMed:19654028}; Single-pass type I membrane protein {ECO:0000269|PubMed:19654028}.		adaptive immune response [GO:0002250]; apoptotic process [GO:0006915]; axonal fasciculation [GO:0007413]; B cell apoptotic process [GO:0001783]; cellular response to tumor necrosis factor [GO:0071356]; humoral immune response [GO:0006959]; myelination [GO:0042552]; negative regulation of B cell proliferation [GO:0030889]; negative regulation of interleukin-10 secretion [GO:2001180]; negative regu…		axon [GO:0030424]; cytoplasm [GO:0005737]; integral component of plasma membrane [GO:0005887]; intrinsic component of plasma membrane [GO:0031226]; plasma membrane [GO:0005886]	GO:0001783; GO:0002250; GO:0005737; GO:0005886; GO:0005887; GO:0006915; GO:0006959; GO:0007413; GO:0019216; GO:0030424; GO:0030889; GO:0031226; GO:0031642; GO:0042130; GO:0042552; GO:0048713; GO:0050852; GO:0051402; GO:0071356; GO:0097252; GO:2000663; GO:2000666; GO:2001180	R-HSA-1989781;	hsa:27242;	17.9187	17.9556	17.9572	17.939	17.9048	18.3583	18.402	18.3847	18.3856	18.4697
MMP1_P03956	-0.906124	-0.794183	-0.774289	-1.00405	-1.20345	0.870352	0.822333	0.847293	0.9189	1.22322	MMP1	Interstitial collagenase;22 kDa interstitial collagenase;27 kDa interstitial collagenase	P03956	1.04193	3.51995e-09	5.46511e-07	-0.819996	FUNCTION: Cleaves collagens of types I, II, and III at one site in the helical domain. Also cleaves collagens of types VII and X (PubMed:2557822, PubMed:2153297, PubMed:1645757). In case of HIV infection, interacts and cleaves the secreted viral Tat protein, leading to a decrease in neuronal Tat's mediated neurotoxicity (PubMed:16807369). {ECO:0000269|PubMed:1645757, ECO:0000269|PubMed:16807369, …	SUBCELLULAR LOCATION: Secreted, extracellular space, extracellular matrix {ECO:0000305|PubMed:2167156}.		cellular protein metabolic process [GO:0044267]; collagen catabolic process [GO:0030574]; cytokine-mediated signaling pathway [GO:0019221]; extracellular matrix disassembly [GO:0022617]; extracellular matrix organization [GO:0030198]; leukocyte migration [GO:0050900]; positive regulation of protein complex assembly [GO:0031334]; proteolysis [GO:0006508]; viral process [GO:0016032]	endopeptidase activity [GO:0004175]; metalloendopeptidase activity [GO:0004222]; serine-type endopeptidase activity [GO:0004252]; zinc ion binding [GO:0008270]	extracellular matrix [GO:0031012]; extracellular region [GO:0005576]	GO:0004175; GO:0004222; GO:0004252; GO:0005576; GO:0006508; GO:0008270; GO:0016032; GO:0019221; GO:0022617; GO:0030198; GO:0030574; GO:0031012; GO:0031334; GO:0044267; GO:0050900	R-HSA-1442490;R-HSA-1474228;R-HSA-1592389;R-HSA-210991;R-HSA-381426;R-HSA-6785807;	hsa:4312;	19.5685	19.6176	19.6263	19.5257	19.4384	20.3464	20.3253	20.3363	20.3676	20.5009
PSMD10_B1AJY5	-1.09908	-0.943194	-1.059	-0.720748	-0.860058	0.763344	0.863629	0.912561	0.890714	1.25183	PSMD10	26S proteasome non-ATPase regulatory subunit 10	B1AJY5	1.0436	3.62191e-09	5.50376e-07	-0.805018						proteasome complex [GO:0000502]	GO:0000502			18.3935	18.4605	18.4108	18.5562	18.4963	19.1941	19.2372	19.2582	19.2488	19.404
NDUFC2_O95298	-0.926129	-0.949557	-1.13337	-0.805938	-0.890618	1.19194	0.85775	0.886292	0.831889	0.937738	NDUFC2	NADH dehydrogenase [ubiquinone] 1 subunit C2;NADH dehydrogenase [ubiquinone] 1 subunit C2, isoform 2	O95298	1.02474	4.16802e-09	6.14224e-07	-0.436626	FUNCTION: Accessory subunit of the mitochondrial membrane respiratory chain NADH dehydrogenase (Complex I), that is believed not to be involved in catalysis. Complex I functions in the transfer of electrons from NADH to the respiratory chain. The immediate electron acceptor for the enzyme is believed to be ubiquinone. {ECO:0000269|PubMed:27626371}.	SUBCELLULAR LOCATION: Mitochondrion inner membrane {ECO:0000305|PubMed:12611891}; Single-pass membrane protein {ECO:0000255}; Matrix side {ECO:0000305}.		mitochondrial electron transport, NADH to ubiquinone [GO:0006120]; mitochondrial respiratory chain complex I assembly [GO:0032981]; neutrophil degranulation [GO:0043312]	NADH dehydrogenase (ubiquinone) activity [GO:0008137]	azurophil granule membrane [GO:0035577]; cytoplasm [GO:0005737]; integral component of membrane [GO:0016021]; mitochondrial inner membrane [GO:0005743]; mitochondrial respiratory chain complex I [GO:0005747]; mitochondrion [GO:0005739]; plasma membrane [GO:0005886]	GO:0005737; GO:0005739; GO:0005743; GO:0005747; GO:0005886; GO:0006120; GO:0008137; GO:0016021; GO:0032981; GO:0035577; GO:0043312	R-HSA-611105;R-HSA-6798695;R-HSA-6799198;	hsa:4718;	17.6528	17.6474	17.6048	17.6807	17.6611	18.1442	18.0666	18.0733	18.0606	18.0852
AP3M1_Q9Y2T2	-1.05997	-0.837854	-0.886686	-0.894119	-1.0122	0.734713	0.900669	0.850455	0.930749	1.27424	AP3M1	AP-3 complex subunit mu-1	Q9Y2T2	1.02893	4.3082e-09	6.14224e-07	-0.560712	FUNCTION: Part of the AP-3 complex, an adaptor-related complex which is not clathrin-associated. The complex is associated with the Golgi region as well as more peripheral structures. It facilitates the budding of vesicles from the Golgi membrane and may be directly involved in trafficking to lysosomes. In concert with the BLOC-1 complex, AP-3 is required to target cargos into vesicles assembled …	SUBCELLULAR LOCATION: Golgi apparatus. Cytoplasmic vesicle membrane {ECO:0000250}; Peripheral membrane protein {ECO:0000250}; Cytoplasmic side {ECO:0000250}. Note=Component of the coat surrounding the cytoplasmic face of coated vesicles located at the Golgi complex. {ECO:0000250}.		anterograde axonal transport [GO:0008089]; anterograde synaptic vesicle transport [GO:0048490]; protein targeting to lysosome [GO:0006622]; vesicle-mediated transport [GO:0016192]; viral process [GO:0016032]	Rab GTPase binding [GO:0017137]	axon cytoplasm [GO:1904115]; clathrin adaptor complex [GO:0030131]; cytoplasmic vesicle membrane [GO:0030659]; Golgi apparatus [GO:0005794]; lysosomal membrane [GO:0005765]; lysosome [GO:0005764]	GO:0005764; GO:0005765; GO:0005794; GO:0006622; GO:0008089; GO:0016032; GO:0016192; GO:0017137; GO:0030131; GO:0030659; GO:0048490; GO:1904115	R-HSA-390471;	hsa:26985;	19.346	19.4123	19.3977	19.3955	19.3602	19.8823	19.9319	19.9169	19.9409	20.0435
NT5E_P21589	-1.00437	-0.988907	-1.01553	-0.80014	-0.894674	0.847454	0.776962	1.08849	0.832279	1.15844	NT5E	5-nucleotidase	P21589	1.02111	4.31165e-09	6.14224e-07	-0.445789	FUNCTION: Hydrolyzes extracellular nucleotides into membrane permeable nucleosides. Exhibits AMP-, NAD-, and NMN-nucleosidase activities. {ECO:0000269|PubMed:21933152}.	SUBCELLULAR LOCATION: Cell membrane; Lipid-anchor, GPI-anchor.	DISEASE: Calcification of joints and arteries (CALJA) [MIM:211800]: A condition characterized by adult-onset calcification of the lower extremity arteries, including the iliac, femoral and tibial arteries, and hand and foot capsule joints. Age of onset has been reported as early as the second decade of life, usually involving intense joint pain or calcification in the hands. {ECO:0000269|PubMed:2…	adenosine biosynthetic process [GO:0046086]; AMP catabolic process [GO:0006196]; DNA metabolic process [GO:0006259]; leukocyte cell-cell adhesion [GO:0007159]; NAD metabolic process [GO:0019674]; negative regulation of inflammatory response [GO:0050728]; purine nucleotide catabolic process [GO:0006195]; pyrimidine nucleoside catabolic process [GO:0046135]	5'-nucleotidase activity [GO:0008253]; metal ion binding [GO:0046872]; nucleotide binding [GO:0000166]	anchored component of membrane [GO:0031225]; cell surface [GO:0009986]; cytosol [GO:0005829]; extracellular exosome [GO:0070062]; membrane [GO:0016020]; nucleoplasm [GO:0005654]; plasma membrane [GO:0005886]	GO:0000166; GO:0005654; GO:0005829; GO:0005886; GO:0006195; GO:0006196; GO:0006259; GO:0007159; GO:0008253; GO:0009986; GO:0016020; GO:0019674; GO:0031225; GO:0046086; GO:0046135; GO:0046872; GO:0050728; GO:0070062	R-HSA-196807;R-HSA-73621;R-HSA-74259;	hsa:4907;	21.0991	21.1028	21.0965	21.1475	21.1251	21.5379	21.5212	21.595	21.5343	21.6116
RCE1_E9PKA7	1.01032	1.13961	0.708173	0.755191	1.05993	-0.745892	-0.883423	-0.893981	-0.936785	-1.21314	RCE1	CAAX prenyl protease 2	E9PKA7	1.07436	4.51373e-09	6.14224e-07	1.18502				CAAX-box protein processing [GO:0071586]	cysteine-type endopeptidase activity [GO:0004197]; metalloendopeptidase activity [GO:0004222]	integral component of endoplasmic reticulum membrane [GO:0030176]	GO:0004197; GO:0004222; GO:0030176; GO:0071586			17.1688	17.2508	16.9773	17.0071	17.2003	16.0555	15.9683	15.9616	15.9345	15.7593
SLC43A3_Q8NBI5	-0.879876	-0.736145	-1.05807	-0.893608	-1.11038	0.822736	0.882249	0.880855	0.808396	1.28384	SLC43A3	Solute carrier family 43 member 3	Q8NBI5	1.04512	4.53777e-09	6.14224e-07	-0.834771	FUNCTION: Putative transporter. {ECO:0000250}.	SUBCELLULAR LOCATION: Membrane {ECO:0000305}; Multi-pass membrane protein {ECO:0000305}.		transmembrane transport [GO:0055085]		integral component of plasma membrane [GO:0005887]	GO:0005887; GO:0055085		hsa:29015;	18.5274	18.5915	18.4479	18.5213	18.4246	19.2869	19.3135	19.3129	19.2805	19.4926
KRAS_P01116	0.94577	0.763256	1.03549	0.747433	1.1791	-0.741028	-0.735282	-1.04753	-1.00499	-1.14222	KRAS	GTPase KRas;GTPase KRas, N-terminally processed	P01116	1.08054	4.56146e-09	6.14224e-07	1.54881	FUNCTION: Ras proteins bind GDP/GTP and possess intrinsic GTPase activity. Plays an important role in the regulation of cell proliferation (PubMed:23698361, PubMed:22711838). Plays a role in promoting oncogenic events by inducing transcriptional silencing of tumor suppressor genes (TSGs) in colorectal cancer (CRC) cells in a ZNF304-dependent manner (PubMed:24623306). {ECO:0000269|PubMed:22711838,…	SUBCELLULAR LOCATION: Cell membrane {ECO:0000269|PubMed:22431598, ECO:0000269|PubMed:23698361}; Lipid-anchor {ECO:0000305|PubMed:23698361}; Cytoplasmic side {ECO:0000305|PubMed:23698361}. Cytoplasm, cytosol {ECO:0000269|PubMed:23698361}.	DISEASE: Leukemia, acute myelogenous (AML) [MIM:601626]: A subtype of acute leukemia, a cancer of the white blood cells. AML is a malignant disease of bone marrow characterized by maturational arrest of hematopoietic precursors at an early stage of development. Clonal expansion of myeloid blasts occurs in bone marrow, blood, and other tissue. Myelogenous leukemias develop from changes in cells th…	actin cytoskeleton organization [GO:0030036]; cytokine-mediated signaling pathway [GO:0019221]; endocrine signaling [GO:0038002]; epithelial tube branching involved in lung morphogenesis [GO:0060441]; female pregnancy [GO:0007565]; forebrain astrocyte development [GO:0021897]; homeostasis of number of cells within a tissue [GO:0048873]; liver development [GO:0001889]; MAPK cascade [GO:0000165]; n…	GDP binding [GO:0019003]; GMP binding [GO:0019002]; GTPase activity [GO:0003924]; GTP binding [GO:0005525]; identical protein binding [GO:0042802]; LRR domain binding [GO:0030275]; protein-containing complex binding [GO:0044877]	cytoplasm [GO:0005737]; cytosol [GO:0005829]; extrinsic component of cytoplasmic side of plasma membrane [GO:0031234]; focal adhesion [GO:0005925]; membrane [GO:0016020]; membrane raft [GO:0045121]; mitochondrion [GO:0005739]; plasma membrane [GO:0005886]	GO:0000165; GO:0001889; GO:0001934; GO:0002223; GO:0003924; GO:0005525; GO:0005737; GO:0005739; GO:0005829; GO:0005886; GO:0005925; GO:0007265; GO:0007565; GO:0008284; GO:0008542; GO:0010628; GO:0016020; GO:0019002; GO:0019003; GO:0019221; GO:0021897; GO:0030036; GO:0030275; GO:0031234; GO:0031647; GO:0032228; GO:0035022; GO:0035900; GO:0038002; GO:0042802; GO:0043406; GO:0043524; GO:0044877; GO:…	R-HSA-112412;R-HSA-1169092;R-HSA-1236382;R-HSA-1250196;R-HSA-1250347;R-HSA-1433557;R-HSA-167044;R-HSA-171007;R-HSA-179812;R-HSA-180336;R-HSA-186763;R-HSA-1963640;R-HSA-210993;R-HSA-2179392;R-HSA-2424491;R-HSA-2428933;R-HSA-2871796;R-HSA-375165;R-HSA-4086398 [P01116-2];R-HSA-442982;R-HSA-5218921;R-HSA-5621575;R-HSA-5637810;R-HSA-5654688;R-HSA-5654693;R-HSA-5654699;R-HSA-5654700;R-HSA-5654704;R-HSA…	hsa:3845;	20.7891	20.6378	20.8635	20.6247	20.9825	19.3908	19.3956	19.1368	19.172	19.0583
WDR34_Q96EX3	-0.94809	-1.06159	-0.949667	-0.8344	-0.877719	0.864877	0.709974	0.80031	0.95247	1.34384	WDR34	WD repeat-containing protein 34	Q96EX3	1.09692	4.66024e-09	6.14224e-07	-1.38202	FUNCTION: Critical for ciliary functions, essential to normal development and survival, most probably as a previously unrecognized component of the mammalian dynein-motor-based intraflagellar transport (IFT) machinery. Acts as a negative regulator of the Toll-like and IL-1R receptor signaling pathways. Inhibits the MAP3K7-induced NF-kappa-B activation pathway. Inhibits MAP3K7 phosphorylation at '…	SUBCELLULAR LOCATION: Cytoplasm {ECO:0000269|PubMed:19521662}. Cytoplasm, cytoskeleton, cilium basal body {ECO:0000269|PubMed:19521662}. Cytoplasm, cytoskeleton, cilium axoneme {ECO:0000269|PubMed:19521662}. Note=Concentrates around the centrioles and basal bodies also showing axonemal staining. {ECO:0000250}.	DISEASE: Short-rib thoracic dysplasia 11 with or without polydactyly (SRTD11) [MIM:615633]: A form of short-rib thoracic dysplasia, a group of autosomal recessive ciliopathies that are characterized by a constricted thoracic cage, short ribs, shortened tubular bones, and a 'trident' appearance of the acetabular roof. Polydactyly is variably present. Non-skeletal involvement can include cleft lip/…	cilium assembly [GO:0060271]; intraciliary transport [GO:0042073]; intraciliary transport involved in cilium assembly [GO:0035735]; microtubule-based movement [GO:0007018]	dynein heavy chain binding [GO:0045504]; dynein light chain binding [GO:0045503]	axoneme [GO:0005930]; centriole [GO:0005814]; ciliary basal body [GO:0036064]; ciliary tip [GO:0097542]; cilium [GO:0005929]; cytoplasmic dynein complex [GO:0005868]; cytosol [GO:0005829]	GO:0005814; GO:0005829; GO:0005868; GO:0005929; GO:0005930; GO:0007018; GO:0035735; GO:0036064; GO:0042073; GO:0045503; GO:0045504; GO:0060271; GO:0097542	R-HSA-5620924;	hsa:89891;	14.2487	14.1648	14.2476	14.3328	14.3008	15.5896	15.475	15.5418	15.6544	15.9438
NDUFAF4_Q9P032	-1.04822	-0.75426	-1.08829	-0.852724	-0.961449	0.852898	0.92294	1.15155	0.813798	0.96376	NDUFAF4	NADH dehydrogenase [ubiquinone] 1 alpha subcomplex assembly factor 4	Q9P032	1.02302	4.78821e-09	6.14224e-07	-0.428406	FUNCTION: Involved in the assembly of mitochondrial NADH:ubiquinone oxidoreductase complex (complex I) (PubMed:18179882, PubMed:28853723). May be involved in cell proliferation and survival of hormone-dependent tumor cells. May be a regulator of breast tumor cell invasion. {ECO:0000269|PubMed:14871833, ECO:0000269|PubMed:17001319, ECO:0000269|PubMed:18179882, ECO:0000269|PubMed:28853723}.	SUBCELLULAR LOCATION: Mitochondrion {ECO:0000269|PubMed:18179882}. Membrane {ECO:0000305}; Lipid-anchor {ECO:0000305}.	DISEASE: Mitochondrial complex I deficiency, nuclear type 15 (MC1DN15) [MIM:618237]: A form of mitochondrial complex I deficiency, the most common biochemical signature of mitochondrial disorders, a group of highly heterogeneous conditions characterized by defective oxidative phosphorylation, which collectively affects 1 in 5-10000 live births. Clinical disorders have variable severity, ranging f…	mitochondrial respiratory chain complex I assembly [GO:0032981]	calmodulin binding [GO:0005516]	mitochondrial inner membrane [GO:0005743]; mitochondrial membrane [GO:0031966]; mitochondrion [GO:0005739]	GO:0005516; GO:0005739; GO:0005743; GO:0031966; GO:0032981	R-HSA-6799198;	hsa:29078;	18.5893	18.6563	18.5802	18.6338	18.6091	19.0221	19.038	19.0901	19.0132	19.0473
PHB_P35232	1.0301	0.888982	1.01476	1.00109	0.757703	-0.788271	-1.03055	-1.06199	-0.693784	-1.11804	PHB	Prohibitin	P35232	1.02399	4.81609e-09	6.14224e-07	0.521013	FUNCTION: Prohibitin inhibits DNA synthesis. It has a role in regulating proliferation. As yet it is unclear if the protein or the mRNA exhibits this effect. May play a role in regulating mitochondrial respiration activity and in aging. {ECO:0000269|PubMed:11302691}.	SUBCELLULAR LOCATION: Mitochondrion inner membrane {ECO:0000269|PubMed:20959514}. Nucleus {ECO:0000269|PubMed:20959514}.		cellular response to interleukin-6 [GO:0071354]; DNA biosynthetic process [GO:0071897]; histone deacetylation [GO:0016575]; mitochondrial calcium ion transmembrane transport [GO:0006851]; mitochondrion organization [GO:0007005]; negative regulation of androgen receptor signaling pathway [GO:0060766]; negative regulation of cell growth [GO:0030308]; negative regulation of cell population prolifera…	complement component C3a binding [GO:0001850]; complement component C3b binding [GO:0001851]; enzyme binding [GO:0019899]; histone deacetylase binding [GO:0042826]; proteinase activated receptor binding [GO:0031871]; protein C-terminus binding [GO:0008022]; transcription regulatory region DNA binding [GO:0044212]	cell surface [GO:0009986]; cytoplasm [GO:0005737]; early endosome [GO:0005769]; extracellular exosome [GO:0070062]; integral component of plasma membrane [GO:0005887]; membrane [GO:0016020]; mitochondrial inner membrane [GO:0005743]; mitochondrion [GO:0005739]; nucleoplasm [GO:0005654]; nucleus [GO:0005634]; plasma membrane [GO:0005886]	GO:0000122; GO:0001649; GO:0001850; GO:0001851; GO:0005634; GO:0005654; GO:0005737; GO:0005739; GO:0005743; GO:0005769; GO:0005886; GO:0005887; GO:0006355; GO:0006851; GO:0007005; GO:0007165; GO:0008022; GO:0008285; GO:0009986; GO:0010628; GO:0010942; GO:0010944; GO:0016020; GO:0016575; GO:0019899; GO:0030308; GO:0031871; GO:0042177; GO:0042826; GO:0042981; GO:0044212; GO:0045745; GO:0045892; GO:…	R-HSA-5673000;R-HSA-6802946;R-HSA-6802955;R-HSA-8949664;R-HSA-9649948;	hsa:5245;	22.2688	22.2297	22.2646	22.2608	22.1932	21.7641	21.6969	21.6881	21.7903	21.6726
DDX6_P26196	-1.01008	-1.00358	-0.702612	-0.904741	-1.08959	0.869274	0.930222	1.03142	0.835582	1.04411	DDX6	Probable ATP-dependent RNA helicase DDX6	P26196	1.01982	4.92786e-09	6.17453e-07	-0.397656	FUNCTION: In the process of mRNA degradation, plays a role in mRNA decapping (PubMed:16364915). Blocks autophagy in nutrient-rich conditions by repressing the expression of ATG-related genes through degradation of their transcripts (PubMed:26098573). {ECO:0000269|PubMed:16364915, ECO:0000269|PubMed:26098573}.	SUBCELLULAR LOCATION: Cytoplasm, P-body {ECO:0000269|PubMed:16364915, ECO:0000269|PubMed:16699599, ECO:0000269|PubMed:20616046, ECO:0000269|PubMed:22915799, ECO:0000269|PubMed:26184334}. Cytoplasm {ECO:0000269|PubMed:26184334}. Nucleus {ECO:0000269|PubMed:26184334}. Note=Upon cellular stress, relocalizes to stress granules (PubMed:26184334). {ECO:0000269|PubMed:26184334}.	DISEASE: Note=A chromosomal aberration involving DDX6 may be a cause of hematopoietic tumors such as B-cell lymphomas. Translocation t(11;14)(q23;q32).	cytoplasmic mRNA processing body assembly [GO:0033962]; exonucleolytic catabolism of deadenylated mRNA [GO:0043928]; negative regulation of neuron differentiation [GO:0045665]; spermatid differentiation [GO:0048515]; stem cell population maintenance [GO:0019827]; stress granule assembly [GO:0034063]; viral RNA genome packaging [GO:0019074]	ATP binding [GO:0005524]; cadherin binding [GO:0045296]; helicase activity [GO:0004386]; mRNA binding [GO:0003729]; protein domain specific binding [GO:0019904]; RNA binding [GO:0003723]; RNA helicase activity [GO:0003724]	cell-cell adherens junction [GO:0005913]; chromatoid body [GO:0033391]; concave side of sperm head [GO:0061830]; cytoplasm [GO:0005737]; cytoplasmic ribonucleoprotein granule [GO:0036464]; cytoplasmic stress granule [GO:0010494]; cytosol [GO:0005829]; heterochromatin [GO:0000792]; membrane [GO:0016020]; mitochondrion [GO:0005739]; nucleolus [GO:0005730]; nucleus [GO:0005634]; outer dense fiber [G…	GO:0000792; GO:0000932; GO:0001520; GO:0003723; GO:0003724; GO:0003729; GO:0004386; GO:0005524; GO:0005634; GO:0005730; GO:0005737; GO:0005739; GO:0005829; GO:0005913; GO:0010494; GO:0016020; GO:0016442; GO:0019074; GO:0019827; GO:0019904; GO:0033391; GO:0033962; GO:0034063; GO:0036464; GO:0043928; GO:0045296; GO:0045665; GO:0048471; GO:0048515; GO:0061830; GO:0097227	R-HSA-430039;	hsa:1656;	20.0528	20.0542	20.1177	20.0751	20.0361	20.4495	20.4623	20.4837	20.4423	20.4864
MCAM_P43121	-0.899372	-0.987438	-0.95305	-0.923006	-0.921722	0.908459	0.815385	0.907415	0.722814	1.33051	MCAM	Cell surface glycoprotein MUC18	P43121	1.03204	5.26351e-09	6.48138e-07	-0.607378	FUNCTION: Plays a role in cell adhesion, and in cohesion of the endothelial monolayer at intercellular junctions in vascular tissue. Its expression may allow melanoma cells to interact with cellular elements of the vascular system, thereby enhancing hematogeneous tumor spread. Could be an adhesion molecule active in neural crest cells during embryonic development. Acts as surface receptor that tr…	SUBCELLULAR LOCATION: Membrane; Single-pass type I membrane protein.		anatomical structure morphogenesis [GO:0009653]; angiogenesis [GO:0001525]; cell adhesion [GO:0007155]; glomerular filtration [GO:0003094]; positive regulation of cell migration [GO:0030335]; vascular wound healing [GO:0061042]		external side of plasma membrane [GO:0009897]; extracellular region [GO:0005576]; extracellular space [GO:0005615]; focal adhesion [GO:0005925]; integral component of membrane [GO:0016021]; nucleus [GO:0005634]; plasma membrane [GO:0005886]	GO:0001525; GO:0003094; GO:0005576; GO:0005615; GO:0005634; GO:0005886; GO:0005925; GO:0007155; GO:0009653; GO:0009897; GO:0016021; GO:0030335; GO:0061042		hsa:4162;	18.9695	18.9409	18.9521	18.9618	18.9622	19.5555	19.5253	19.5551	19.4953	19.6923
HM13_Q8TCT9	-1.09536	-0.955746	-0.972934	-0.590796	-1.06286	0.955865	0.930778	1.16103	0.76541	0.864612	HM13	Minor histocompatibility antigen H13	Q8TCT9	1.03862	5.51577e-09	6.67689e-07	-0.743442	FUNCTION: Catalyzes intramembrane proteolysis of some signal peptides after they have been cleaved from a preprotein, resulting in the release of the fragment from the ER membrane into the cytoplasm. Required to generate lymphocyte cell surface (HLA-E) epitopes derived from MHC class I signal peptides (PubMed:11714810). May be necessary for the removal of the signal peptide that remains attached …	SUBCELLULAR LOCATION: Endoplasmic reticulum membrane {ECO:0000269|PubMed:15998642}; Multi-pass membrane protein {ECO:0000305}. Membrane {ECO:0000269|PubMed:12077416, ECO:0000269|PubMed:15385547}; Multi-pass membrane protein {ECO:0000305}; Lumenal side {ECO:0000269|PubMed:12077416, ECO:0000269|PubMed:15385547}.; SUBCELLULAR LOCATION: Isoform 4: Cell membrane {ECO:0000250|UniProtKB:Q9D8V0}; Multi-p…		in utero embryonic development [GO:0001701]; membrane protein proteolysis [GO:0033619]; membrane protein proteolysis involved in retrograde protein transport, ER to cytosol [GO:1904211]; signal peptide processing [GO:0006465]	aspartic endopeptidase activity, intramembrane cleaving [GO:0042500]; peptidase activity [GO:0008233]; protein homodimerization activity [GO:0042803]; ubiquitin protein ligase binding [GO:0031625]	cell surface [GO:0009986]; Derlin-1 retrotranslocation complex [GO:0036513]; endoplasmic reticulum [GO:0005783]; endoplasmic reticulum membrane [GO:0005789]; integral component of cytoplasmic side of endoplasmic reticulum membrane [GO:0071458]; integral component of lumenal side of endoplasmic reticulum membrane [GO:0071556]; membrane [GO:0016020]; plasma membrane [GO:0005886]; rough endoplasmic …	GO:0001701; GO:0005783; GO:0005789; GO:0005791; GO:0005886; GO:0006465; GO:0008233; GO:0009986; GO:0016020; GO:0031625; GO:0033619; GO:0036513; GO:0042500; GO:0042803; GO:0071458; GO:0071556; GO:1904211		hsa:81502;	19.1881	19.2436	19.2367	19.3886	19.201	20.0031	19.9931	20.0846	19.9274	19.9669
APOL2_J3KQL8	-0.787608	-1.06948	-0.92071	-0.744505	-1.15725	0.902288	0.912172	1.03518	0.68843	1.14148	APOL2	Apolipoprotein L2	J3KQL8	1.03972	5.79382e-09	6.89657e-07	-0.675601				lipid transport [GO:0006869]; lipoprotein metabolic process [GO:0042157]	lipid binding [GO:0008289]	extracellular region [GO:0005576]; integral component of membrane [GO:0016021]	GO:0005576; GO:0006869; GO:0008289; GO:0016021; GO:0042157			17.0614	16.9596	17.0133	17.0769	16.9279	17.6713	17.6749	17.7193	17.5941	17.7576
TLCD1_Q96CP7	-0.988635	-1.10399	-0.736157	-0.934363	-0.903955	0.867069	0.886253	0.610352	1.08448	1.21894	TLCD1	Calfacilitin	Q96CP7	1.14099	5.96988e-09	6.98965e-07	-1.51962	FUNCTION: Regulates the composition and fluidity of the plasma membrane (PubMed:30509349). Inhibits the incorporation of membrane-fluidizing phospholipids containing omega-3 long-chain polyunsaturated fatty acids (LCPUFA) and thereby promotes membrane rigidity (PubMed:30509349). Does not appear to have any effect on LCPUFA synthesis (PubMed:30509349). {ECO:0000269|PubMed:30509349}.	SUBCELLULAR LOCATION: Cell membrane {ECO:0000305|PubMed:30509349}; Multi-pass membrane protein {ECO:0000250|UniProtKB:F1NZP5}.		membrane assembly [GO:0071709]; phospholipid homeostasis [GO:0055091]; plasma membrane organization [GO:0007009]; regulation of membrane lipid distribution [GO:0097035]		integral component of membrane [GO:0016021]; plasma membrane [GO:0005886]	GO:0005886; GO:0007009; GO:0016021; GO:0055091; GO:0071709; GO:0097035		hsa:116238;	10.7333	10.6394	10.9388	10.7775	10.8022	12.2438	12.2595	12.0349	12.4208	12.5303
PPA2_Q9H2U2	-1.03733	-0.630959	-1.09916	-1.06869	-0.848387	0.924065	0.895552	1.11479	0.761703	0.988418	PPA2	Inorganic pyrophosphatase 2, mitochondrial	Q9H2U2	1.03023	6.31616e-09	7.13735e-07	-0.566532	FUNCTION: Hydrolyzes inorganic pyrophosphate (PubMed:27523597). This activity is essential for correct regulation of mitochondrial membrane potential, and mitochondrial organization and function (PubMed:27523598). {ECO:0000269|PubMed:27523597, ECO:0000269|PubMed:27523598}.	SUBCELLULAR LOCATION: Mitochondrion {ECO:0000305}.	DISEASE: Sudden cardiac failure, alcohol-induced (SCFAI) [MIM:617223]: An autosomal recessive disease characterized by sudden death due to unexpected cardiac arrest following ingestion of small amounts of alcohol. {ECO:0000269|PubMed:27523597}. Note=The disease is caused by mutations affecting the gene represented in this entry.; DISEASE: Sudden cardiac failure, infantile (SCFI) [MIM:617222]: A d…	diphosphate metabolic process [GO:0071344]; phosphate-containing compound metabolic process [GO:0006796]; regulation of mitochondrial membrane potential [GO:0051881]; tRNA aminoacylation for protein translation [GO:0006418]	inorganic diphosphatase activity [GO:0004427]; magnesium ion binding [GO:0000287]; protein serine/threonine phosphatase activity [GO:0004722]	mitochondrial matrix [GO:0005759]	GO:0000287; GO:0004427; GO:0004722; GO:0005759; GO:0006418; GO:0006796; GO:0051881; GO:0071344	R-HSA-379726;R-HSA-71737;	hsa:27068;	18.7096	18.8325	18.6909	18.7002	18.7668	19.3026	19.294	19.3603	19.2536	19.3221
CTSB_P07858	-0.924001	-1.03726	-1.06865	-0.684064	-0.965034	0.815882	0.835471	0.972764	0.795221	1.25966	CTSB	Cathepsin B;Cathepsin B light chain;Cathepsin B heavy chain	P07858	1.03511	6.45638e-09	7.13735e-07	-0.650874	FUNCTION: Thiol protease which is believed to participate in intracellular degradation and turnover of proteins (PubMed:12220505). Cleaves matrix extracellular phosphoglycoprotein MEPE (PubMed:12220505). Has also been implicated in tumor invasion and metastasis (PubMed:3972105). {ECO:0000269|PubMed:12220505, ECO:0000269|PubMed:3972105}.	SUBCELLULAR LOCATION: Lysosome {ECO:0000269|PubMed:16733801}. Melanosome {ECO:0000269|PubMed:17081065}. Secreted, extracellular space {ECO:0000250|UniProtKB:A1E295}. Note=Identified by mass spectrometry in melanosome fractions from stage I to stage IV. {ECO:0000269|PubMed:17081065}.	DISEASE: Keratolytic winter erythema (KWE) [MIM:148370]: An autosomal dominant genodermatosis characterized by recurrent episodes of palmoplantar erythema and epidermal peeling presenting seasonal variation. KWE manifests during childhood. Skin lesions may spread to the dorsum of hands and feet and to the interdigital spaces. Lower legs, knees and thighs may also be involved. A less common findin…	cellular response to thyroid hormone stimulus [GO:0097067]; collagen catabolic process [GO:0030574]; decidualization [GO:0046697]; epithelial cell differentiation [GO:0030855]; neutrophil degranulation [GO:0043312]; proteolysis [GO:0006508]; proteolysis involved in cellular protein catabolic process [GO:0051603]; regulation of apoptotic process [GO:0042981]; regulation of catalytic activity [GO:0…	collagen binding [GO:0005518]; cysteine-type endopeptidase activity [GO:0004197]; cysteine-type peptidase activity [GO:0008234]; peptidase activity [GO:0008233]; proteoglycan binding [GO:0043394]	collagen-containing extracellular matrix [GO:0062023]; endolysosome lumen [GO:0036021]; extracellular exosome [GO:0070062]; extracellular region [GO:0005576]; extracellular space [GO:0005615]; ficolin-1-rich granule lumen [GO:1904813]; intracellular [GO:0005622]; intracellular membrane-bounded organelle [GO:0043231]; lysosome [GO:0005764]; melanosome [GO:0042470]; nucleolus [GO:0005730]; perinucl…	GO:0002224; GO:0004197; GO:0005518; GO:0005576; GO:0005615; GO:0005622; GO:0005730; GO:0005764; GO:0006508; GO:0008233; GO:0008234; GO:0030574; GO:0030855; GO:0036021; GO:0042470; GO:0042981; GO:0043231; GO:0043312; GO:0043394; GO:0046697; GO:0046718; GO:0048471; GO:0050790; GO:0051603; GO:0062023; GO:0070062; GO:0097067; GO:1904813	R-HSA-1442490;R-HSA-1679131;R-HSA-2022090;R-HSA-2132295;R-HSA-6798695;	hsa:1508;	18.5401	18.5007	18.4898	18.6235	18.5258	19.1451	19.1519	19.1997	19.1379	19.2995
PEF1_Q9UBV8	-1.00174	-1.04493	-0.966754	-0.879512	-0.800877	1.1543	1.13969	0.756646	0.846575	0.7966	PEF1	Peflin	Q9UBV8	1.02756	6.47483e-09	7.13735e-07	-0.470254	FUNCTION: Calcium-binding protein that acts as an adapter that bridges unrelated proteins or stabilizes weak protein-protein complexes in response to calcium. Together with PDCD6, acts as calcium-dependent adapter for the BCR(KLHL12) complex, a complex involved in endoplasmic reticulum (ER)-Golgi transport by regulating the size of COPII coats (PubMed:27716508). In response to cytosolic calcium i…	SUBCELLULAR LOCATION: Cytoplasm {ECO:0000269|PubMed:11278427}. Endoplasmic reticulum {ECO:0000250|UniProtKB:Q641Z8}. Membrane {ECO:0000269|PubMed:11278427}; Peripheral membrane protein {ECO:0000269|PubMed:11278427}. Cytoplasmic vesicle, COPII-coated vesicle membrane {ECO:0000269|PubMed:27716508}; Peripheral membrane protein {ECO:0000305}. Note=Membrane-associated in the presence of Ca(2+) (PubMed…		COPII vesicle coating [GO:0048208]; endoplasmic reticulum to Golgi vesicle-mediated transport [GO:0006888]; neural crest cell development [GO:0014032]; neural crest formation [GO:0014029]; positive regulation of protein monoubiquitination [GO:1902527]; response to calcium ion [GO:0051592]	calcium-dependent protein binding [GO:0048306]; calcium ion binding [GO:0005509]; molecular adaptor activity [GO:0060090]; protein dimerization activity [GO:0046983]; protein heterodimerization activity [GO:0046982]; RNA binding [GO:0003723]	COPII vesicle coat [GO:0030127]; cytoplasm [GO:0005737]; endoplasmic reticulum [GO:0005783]; extracellular exosome [GO:0070062]; Golgi membrane [GO:0000139]	GO:0000139; GO:0003723; GO:0005509; GO:0005737; GO:0005783; GO:0006888; GO:0014029; GO:0014032; GO:0030127; GO:0046982; GO:0046983; GO:0048208; GO:0048306; GO:0051592; GO:0060090; GO:0070062; GO:1902527		hsa:553115;	17.0474	17.0365	17.0561	17.078	17.0977	17.5874	17.5837	17.4878	17.5103	17.4978
MBIP_S4R3P6	-0.65596	-0.976379	-0.962169	-0.933214	-1.17194	1.01245	1.03889	0.882266	0.928306	0.837743	MBIP	MAP3K12-binding inhibitory protein 1	S4R3P6	1.0267	6.5728e-09	7.13735e-07	-0.430258										16.1782	16.1049	16.1081	16.1148	16.0601	16.5601	16.5661	16.5303	16.5408	16.5201
VPS26B_Q4G0F5	-1.09282	-0.886856	-1.00917	-1.08515	-0.610807	0.890892	0.819092	1.12086	0.85386	1.00009	VPS26B	Vacuolar protein sorting-associated protein 26B	Q4G0F5	1.03404	6.64662e-09	7.13735e-07	-0.55272	FUNCTION: Acts as component of the retromer cargo-selective complex (CSC). The CSC is believed to be the core functional component of retromer or respective retromer complex variants acting to prevent missorting of selected transmembrane cargo proteins into the lysosomal degradation pathway. The recruitment of the CSC to the endosomal membrane involves RAB7A and SNX3. The SNX-BAR retromer mediate…	SUBCELLULAR LOCATION: Cytoplasm {ECO:0000250|UniProtKB:Q8C0E2}. Membrane; Peripheral membrane protein {ECO:0000250|UniProtKB:Q8C0E2}. Early endosome {ECO:0000250|UniProtKB:Q8C0E2}. Late endosome {ECO:0000250|UniProtKB:Q8C0E2}. Note=Localizes to early and late endosomal structures (By similarity). {ECO:0000250|UniProtKB:Q8C0E2}.		cellular response to interferon-gamma [GO:0071346]; intracellular protein transport [GO:0006886]; regulation of macroautophagy [GO:0016241]; retrograde transport, endosome to Golgi [GO:0042147]		cytosol [GO:0005829]; early endosome [GO:0005769]; endosome [GO:0005768]; late endosome [GO:0005770]; phagocytic vesicle [GO:0045335]; retromer, cargo-selective complex [GO:0030906]; retromer complex [GO:0030904]	GO:0005768; GO:0005769; GO:0005770; GO:0005829; GO:0006886; GO:0016241; GO:0030904; GO:0030906; GO:0042147; GO:0045335; GO:0071346		hsa:112936;	16.193	16.2537	16.2177	16.1952	16.3351	16.7781	16.7569	16.8459	16.7672	16.8103
CAB39_A0A087X0K1	-0.870954	-0.829562	-1.0454	-0.985646	-0.939943	0.737345	0.852352	0.99439	0.754071	1.33334	CAB39	Calcium-binding protein 39	A0A087X0K1	1.0458	6.77276e-09	7.13735e-07	-0.853513										18.6663	18.6852	18.5866	18.6139	18.6348	19.4009	19.4535	19.5183	19.4086	19.6732
MALSU1_Q96EH3	-1.01492	-0.803742	-1.03549	-0.753072	-1.0716	0.878273	0.910056	0.890289	0.732078	1.26813	MALSU1	Mitochondrial assembly of ribosomal large subunit protein 1	Q96EH3	1.03871	6.79557e-09	7.13735e-07	-0.638436	FUNCTION: Required for normal mitochondrial ribosome function and mitochondrial translation (PubMed:22238375, PubMed:23171548). May play a role in ribosome biogenesis by preventing premature association of the 28S and 39S ribosomal subunits (Probable). Interacts with mitochondrial ribosomal protein L14 (MRPL14), probably blocking formation of intersubunit bridge B8, preventing association of the …	SUBCELLULAR LOCATION: Mitochondrion matrix {ECO:0000269|PubMed:16548050, ECO:0000269|PubMed:22238375, ECO:0000269|PubMed:22238376, ECO:0000269|PubMed:22829778, ECO:0000269|PubMed:23171548, ECO:0000305|PubMed:28892042}. Note=Colocalizes with MRPL12 and/or MRPL14. {ECO:0000269|PubMed:22238375, ECO:0000269|PubMed:22829778}.		negative regulation of mitochondrial translation [GO:0070130]; negative regulation of ribosome biogenesis [GO:0090071]; negative regulation of translation [GO:0017148]; ribosomal large subunit biogenesis [GO:0042273]	ribosomal large subunit binding [GO:0043023]	cytosol [GO:0005829]; mitochondrial matrix [GO:0005759]; mitochondrion [GO:0005739]	GO:0005739; GO:0005759; GO:0005829; GO:0017148; GO:0042273; GO:0043023; GO:0070130; GO:0090071		hsa:115416;	16.4675	16.5396	16.4605	16.5568	16.4482	17.1134	17.1242	17.1175	17.0635	17.2463
CCDC160_A6NGH7	-0.811876	-0.962526	-1.10112	-0.770608	-1.01808	0.924141	0.921949	0.837211	0.670547	1.31036	CCDC160	Coiled-coil domain-containing protein 160	A6NGH7	1.11744	6.9973e-09	7.24272e-07	-1.63256									hsa:347475;	14.0067	13.8749	13.7536	14.0429	13.8263	15.5258	15.5239	15.4498	15.3039	15.8638
SERINC3_Q13530	-0.823656	-0.747819	-1.22888	-1.08971	-0.77566	0.93179	0.783475	0.976472	0.78793	1.18605	SERINC3	Serine incorporator 3	Q13530	1.08405	7.15732e-09	7.30251e-07	-1.23871	FUNCTION: Restriction factor required to restrict infectivity of lentiviruses, such as HIV-1: acts by inhibiting an early step of viral infection. Impairs the penetration of the viral particle into the cytoplasm (PubMed:26416733, PubMed:26416734). {ECO:0000269|PubMed:26416733, ECO:0000269|PubMed:26416734}.	SUBCELLULAR LOCATION: Cell membrane {ECO:0000250|UniProtKB:Q86VE9}; Multi-pass membrane protein {ECO:0000255}. Golgi apparatus membrane {ECO:0000250|UniProtKB:Q9QZI9}; Multi-pass membrane protein {ECO:0000250|UniProtKB:Q9QZI9}.; SUBCELLULAR LOCATION: Cytoplasm, perinuclear region {ECO:0000305|PubMed:26416734}. Note=(Microbial infection) Upon HIV-1 infection, it is redirected to perinuclear region…		defense response to virus [GO:0051607]; detection of virus [GO:0009597]; innate immune response [GO:0045087]; L-serine biosynthetic process [GO:0006564]; phosphatidylserine metabolic process [GO:0006658]; positive regulation of endoplasmic reticulum stress-induced intrinsic apoptotic signaling pathway [GO:1902237]; sphingolipid metabolic process [GO:0006665]		Golgi membrane [GO:0000139]; integral component of membrane [GO:0016021]; perinuclear region of cytoplasm [GO:0048471]; plasma membrane [GO:0005886]	GO:0000139; GO:0005886; GO:0006564; GO:0006658; GO:0006665; GO:0009597; GO:0016021; GO:0045087; GO:0048471; GO:0051607; GO:1902237	R-HSA-977347;	hsa:10955;	14.8106	14.8609	14.5416	14.634	14.8424	15.9757	15.8773	16.0054	15.8802	16.1445
DAB2IP_H0Y3A3	-0.748414	-0.737362	-1.12901	-1.1556	-0.900538	0.912316	0.799415	1.12501	0.749795	1.08439	DAB2IP	Disabled homolog 2-interacting protein	H0Y3A3	1.05066	7.46763e-09	7.43075e-07	-0.811211				negative regulation of angiogenesis [GO:0016525]; negative regulation of cell population proliferation [GO:0008285]; negative regulation of vascular endothelial growth factor receptor signaling pathway [GO:0030948]; positive regulation of apoptotic process [GO:0043065]; reelin-mediated signaling pathway [GO:0038026]	GTPase activator activity [GO:0005096]		GO:0005096; GO:0008285; GO:0016525; GO:0030948; GO:0038026; GO:0043065			16.0944	16.0992	15.9291	15.9176	16.0283	16.8154	16.7664	16.9078	16.7449	16.8902
PRNP_P04156	-0.772077	-1.11629	-1.02149	-0.716781	-1.06955	1.0699	0.886996	1.01512	0.797654	0.926522	PRNP	Major prion protein	P04156	1.02334	7.49109e-09	7.43075e-07	-0.438062	FUNCTION: Its primary physiological function is unclear. May play a role in neuronal development and synaptic plasticity. May be required for neuronal myelin sheath maintenance. May promote myelin homeostasis through acting as an agonist for ADGRG6 receptor. May play a role in iron uptake and iron homeostasis. Soluble oligomers are toxic to cultured neuroblastoma cells and induce apoptosis (in vi…	SUBCELLULAR LOCATION: Cell membrane; Lipid-anchor, GPI-anchor {ECO:0000269|PubMed:19936054}. Golgi apparatus {ECO:0000250|UniProtKB:P04925}. Note=Targeted to lipid rafts via association with the heparan sulfate chains of GPC1. Colocates, in the presence of Cu(2+), to vesicles in para- and perinuclear regions, where both proteins undergo internalization. Heparin displaces PRNP from lipid rafts and…	DISEASE: Note=PrP is found in high quantity in the brain of humans and animals infected with neurodegenerative diseases known as transmissible spongiform encephalopathies or prion diseases, like: Creutzfeldt-Jakob disease (CJD), fatal familial insomnia (FFI), Gerstmann-Straussler disease (GSD), Huntington disease-like type 1 (HDL1) and kuru in humans; scrapie in sheep and goat; bovine spongiform …	activation of protein kinase activity [GO:0032147]; calcium-mediated signaling using intracellular calcium source [GO:0035584]; cell cycle arrest [GO:0007050]; cellular copper ion homeostasis [GO:0006878]; cellular response to amyloid-beta [GO:1904646]; cellular response to copper ion [GO:0071280]; cellular response to drug [GO:0035690]; dendritic spine maintenance [GO:0097062]; epithelial cell d…	amyloid-beta binding [GO:0001540]; aspartic-type endopeptidase inhibitor activity [GO:0019828]; ATP-dependent protein binding [GO:0043008]; calcium-dependent protein binding [GO:0048306]; calcium ion binding [GO:0005509]; chaperone binding [GO:0051087]; chondroitin sulfate binding [GO:0035374]; copper ion binding [GO:0005507]; cupric ion binding [GO:1903135]; cuprous ion binding [GO:1903136]; gly…	anchored component of external side of plasma membrane [GO:0031362]; cell [GO:0005623]; cell surface [GO:0009986]; cytoplasm [GO:0005737]; cytosol [GO:0005829]; dendrite [GO:0030425]; endoplasmic reticulum [GO:0005783]; extracellular exosome [GO:0070062]; extrinsic component of membrane [GO:0019898]; Golgi apparatus [GO:0005794]; inclusion body [GO:0016234]; intracellular membrane-bounded organel…	GO:0001540; GO:0001933; GO:0002020; GO:0005507; GO:0005509; GO:0005521; GO:0005539; GO:0005623; GO:0005634; GO:0005737; GO:0005783; GO:0005794; GO:0005829; GO:0005886; GO:0006878; GO:0006979; GO:0007050; GO:0007219; GO:0007611; GO:0007616; GO:0008017; GO:0008201; GO:0009986; GO:0010955; GO:0014069; GO:0015631; GO:0016234; GO:0019828; GO:0019898; GO:0030425; GO:0030855; GO:0031362; GO:0031648; GO:…	R-HSA-419037;R-HSA-9609523;	hsa:5621;	18.8097	18.7295	18.7516	18.8226	18.7404	19.2393	19.1966	19.2265	19.1758	19.2059
SSB_P05455	-0.888318	-1.06163	-1.04667	-0.593125	-1.08622	1.0386	0.979316	1.01365	0.681847	0.962545	SSB	Lupus La protein	P05455	1.03106	7.67401e-09	7.50792e-07	-0.655997	FUNCTION: Binds to the 3' poly(U) terminus of nascent RNA polymerase III transcripts, protecting them from exonuclease digestion and facilitating their folding and maturation (PubMed:3192525, PubMed:2470590). In case of Coxsackievirus B3 infection, binds to the viral internal ribosome entry site (IRES) and stimulates the IRES-mediated translation (PubMed:12384597). {ECO:0000269|PubMed:12384597, E…	SUBCELLULAR LOCATION: Nucleus {ECO:0000305}.		histone mRNA metabolic process [GO:0008334]; IRES-dependent viral translational initiation [GO:0075522]; nuclear histone mRNA catabolic process [GO:0071045]; protein localization to cytoplasmic stress granule [GO:1903608]; tRNA 3'-end processing [GO:0042780]; tRNA 5'-leader removal [GO:0001682]; tRNA export from nucleus [GO:0006409]; tRNA modification [GO:0006400]; tRNA processing [GO:0008033]	mRNA binding [GO:0003729]; poly(U) RNA binding [GO:0008266]; RNA binding [GO:0003723]; sequence-specific mRNA binding [GO:1990825]; tRNA binding [GO:0000049]	cytoplasm [GO:0005737]; nuclear chromosome, telomeric region [GO:0000784]; nucleus [GO:0005634]; ribonucleoprotein complex [GO:1990904]	GO:0000049; GO:0000784; GO:0001682; GO:0003723; GO:0003729; GO:0005634; GO:0005737; GO:0006400; GO:0006409; GO:0008033; GO:0008266; GO:0008334; GO:0042780; GO:0071045; GO:0075522; GO:1903608; GO:1990825; GO:1990904	R-HSA-73980;R-HSA-749476;	hsa:6741;	21.1387	21.0779	21.0831	21.2422	21.0693	21.8145	21.7937	21.8058	21.6894	21.7878
UBE2K_P61086	-1.00955	-1.06665	-0.794137	-0.690243	-1.12179	0.854254	0.951349	1.17679	0.769565	0.930419	UBE2K	Ubiquitin-conjugating enzyme E2 K	P61086	1.02741	8.38108e-09	8.01409e-07	-0.53639	FUNCTION: Accepts ubiquitin from the E1 complex and catalyzes its covalent attachment to other proteins. In vitro, in the presence or in the absence of BRCA1-BARD1 E3 ubiquitin-protein ligase complex, catalyzes the synthesis of 'Lys-48'-linked polyubiquitin chains. Does not transfer ubiquitin directly to but elongates monoubiquitinated substrate protein. Mediates the selective degradation of shor…	SUBCELLULAR LOCATION: Cytoplasm {ECO:0000250|UniProtKB:P61085}.		cellular response to interferon-beta [GO:0035458]; free ubiquitin chain polymerization [GO:0010994]; intrinsic apoptotic signaling pathway in response to endoplasmic reticulum stress [GO:0070059]; positive regulation of peptidyl-threonine phosphorylation [GO:0010800]; positive regulation of type I interferon-mediated signaling pathway [GO:0060340]; protein K48-linked ubiquitination [GO:0070936]; …	ATP binding [GO:0005524]; ubiquitin conjugating enzyme activity [GO:0061631]; ubiquitin protein ligase binding [GO:0031625]; ubiquitin-protein transferase activity [GO:0004842]; ubiquitin-ubiquitin ligase activity [GO:0034450]	cell [GO:0005623]; cytosol [GO:0005829]; filopodium tip [GO:0032433]; nucleus [GO:0005634]	GO:0004842; GO:0005524; GO:0005623; GO:0005634; GO:0005829; GO:0006511; GO:0010800; GO:0010994; GO:0016567; GO:0031625; GO:0032433; GO:0032434; GO:0034450; GO:0035458; GO:0060340; GO:0061631; GO:0070059; GO:0070936	R-HSA-8866652;R-HSA-936440;R-HSA-983168;	hsa:3093;	19.5482	19.5319	19.6099	19.6397	19.5161	20.082	20.1098	20.1744	20.0578	20.1038
PGPEP1_U3KQ24	-1.02198	-0.750588	-0.922896	-0.982789	-0.98788	0.888144	0.897776	0.69227	0.837962	1.34998	PGPEP1	Pyroglutamyl-peptidase 1	U3KQ24	1.06263	8.4158e-09	8.01409e-07	-0.951933					pyroglutamyl-peptidase activity [GO:0016920]	cytosol [GO:0005829]	GO:0005829; GO:0016920			15.1528	15.2912	15.2034	15.1728	15.1702	16.127	16.132	16.0271	16.1014	16.3626
PDCD6_A0A024QZ42	-1.08686	-1.00419	-0.877836	-0.640643	-1.05689	0.816603	0.865449	0.973143	0.753676	1.25755	PDCD6	Programmed cell death protein 6	A0A024QZ42	1.04898	8.92615e-09	8.38823e-07	-0.879968					calcium ion binding [GO:0005509]		GO:0005509			17.8947	17.9336	17.9932	18.105	17.9088	18.792	18.8151	18.8658	18.7624	18.9999
ERAP1_Q9NZ08	-0.937915	-1.00693	-1.04244	-0.780058	-0.924267	0.720926	0.875272	0.88613	0.953936	1.25535	ERAP1	Endoplasmic reticulum aminopeptidase 1	Q9NZ08	1.02248	9.35702e-09	8.55916e-07	-0.443122	FUNCTION: Aminopeptidase that plays a central role in peptide trimming, a step required for the generation of most HLA class I-binding peptides. Peptide trimming is essential to customize longer precursor peptides to fit them to the correct length required for presentation on MHC class I molecules. Strongly prefers substrates 9-16 residues long. Rapidly degrades 13-mer to a 9-mer and then stops. …	SUBCELLULAR LOCATION: Endoplasmic reticulum membrane {ECO:0000305|PubMed:15908954}; Single-pass type II membrane protein {ECO:0000305|PubMed:15908954}.		adaptive immune response [GO:0002250]; angiogenesis [GO:0001525]; antigen processing and presentation of endogenous peptide antigen via MHC class I [GO:0019885]; antigen processing and presentation of peptide antigen via MHC class I [GO:0002474]; fat cell differentiation [GO:0045444]; membrane protein ectodomain proteolysis [GO:0006509]; peptide catabolic process [GO:0043171]; positive regulation…	aminopeptidase activity [GO:0004177]; interleukin-1, type II receptor binding [GO:0005151]; interleukin-6 receptor binding [GO:0005138]; metalloaminopeptidase activity [GO:0070006]; metalloexopeptidase activity [GO:0008235]; peptide binding [GO:0042277]; zinc ion binding [GO:0008270]	cytoplasm [GO:0005737]; cytosol [GO:0005829]; endoplasmic reticulum [GO:0005783]; endoplasmic reticulum lumen [GO:0005788]; endoplasmic reticulum membrane [GO:0005789]; extracellular exosome [GO:0070062]; extracellular region [GO:0005576]; extracellular space [GO:0005615]; integral component of membrane [GO:0016021]; membrane [GO:0016020]	GO:0001525; GO:0002250; GO:0002474; GO:0004177; GO:0005138; GO:0005151; GO:0005576; GO:0005615; GO:0005737; GO:0005783; GO:0005788; GO:0005789; GO:0005829; GO:0006508; GO:0006509; GO:0008217; GO:0008235; GO:0008270; GO:0009617; GO:0016020; GO:0016021; GO:0019885; GO:0042277; GO:0043171; GO:0045088; GO:0045444; GO:0045766; GO:0070006; GO:0070062	R-HSA-983170;	hsa:51752;	19.7096	19.6933	19.6849	19.7469	19.7128	20.1013	20.1377	20.1403	20.1563	20.2275
CAAP1_Q9H8G2	-0.969008	-0.990963	-0.923766	-0.658196	-1.1349	0.831414	0.77581	0.830935	1.03269	1.20599	CAAP1	Caspase activity and apoptosis inhibitor 1	Q9H8G2	1.03322	9.38446e-09	8.55916e-07	-0.582521	FUNCTION: Anti-apoptotic protein that modulates a caspase-10 dependent mitochondrial caspase-3/9 feedback amplification loop. {ECO:0000269|PubMed:21980415}.			apoptotic process [GO:0006915]; negative regulation of cysteine-type endopeptidase activity involved in apoptotic signaling pathway [GO:2001268]			GO:0006915; GO:2001268		hsa:79886;	17.5235	17.5167	17.5376	17.6203	17.4718	18.0841	18.0668	18.084	18.1468	18.2008
TSPAN4_E9PN41	-0.841209	-0.627157	-0.866774	-1.2825	-1.04693	0.98723	0.925584	1.00579	0.731984	1.01398	TSPAN4	Tetraspanin;Tetraspanin-4	E9PN41	1.0583	9.53767e-09	8.55916e-07	-0.91917						integral component of membrane [GO:0016021]	GO:0016021			15.8116	15.9171	15.799	15.5942	15.7103	16.7124	16.682	16.7215	16.5866	16.7256
SLC39A7_Q92504	-0.91884	-1.10369	-0.595813	-0.915002	-1.13333	0.848001	0.902437	1.206	0.927762	0.782473	SLC39A7	Zinc transporter SLC39A7	Q92504	1.04786	9.59903e-09	8.55916e-07	-0.813513	FUNCTION: Zinc transporter, that transports Zn(2+) from the endoplasmic reticulum/Golgi apparatus to the cytosol. Transport is stimulated by growth factors, such as EGF, and Ca(2+), as well as by exogenous Zn(2+). {ECO:0000269|PubMed:14525538, ECO:0000269|PubMed:15705588, ECO:0000269|PubMed:22317921}.	SUBCELLULAR LOCATION: Endoplasmic reticulum membrane; Multi-pass membrane protein. Golgi apparatus, cis-Golgi network membrane.		cellular zinc ion homeostasis [GO:0006882]; zinc ion transmembrane transport [GO:0071577]	zinc ion transmembrane transporter activity [GO:0005385]	cell [GO:0005623]; endoplasmic reticulum [GO:0005783]; endoplasmic reticulum membrane [GO:0005789]; Golgi apparatus [GO:0005794]; integral component of membrane [GO:0016021]; membrane [GO:0016020]; nucleoplasm [GO:0005654]	GO:0005385; GO:0005623; GO:0005654; GO:0005783; GO:0005789; GO:0005794; GO:0006882; GO:0016020; GO:0016021; GO:0071577	R-HSA-442380;	hsa:7922;	17.0033	16.9227	17.144	17.0049	16.9098	17.7733	17.797	17.9293	17.808	17.7447
ACP2_E9PQY3	-1.1335	-0.827594	-0.926589	-0.937745	-0.84854	0.893522	0.806114	0.745872	0.908337	1.32012	ACP2	Lysosomal acid phosphatase	E9PQY3	1.03442	9.70725e-09	8.55916e-07	-0.618837						integral component of membrane [GO:0016021]	GO:0016021			17.9127	18.014	17.9812	17.9775	18.007	18.5836	18.5547	18.5348	18.5885	18.7249
GSTM3_P21266	-1.11162	-0.921754	-0.952765	-0.745962	-0.932176	0.688426	0.900943	0.942108	0.807666	1.32513	GSTM3	Glutathione S-transferase Mu 3	P21266	1.04458	1.01529e-08	8.84296e-07	-0.877168	FUNCTION: Conjugation of reduced glutathione to a wide number of exogenous and endogenous hydrophobic electrophiles. May govern uptake and detoxification of both endogenous compounds and xenobiotics at the testis and brain blood barriers. {ECO:0000269|PubMed:10587441}.	SUBCELLULAR LOCATION: Cytoplasm.		cellular detoxification of nitrogen compound [GO:0070458]; establishment of blood-nerve barrier [GO:0008065]; glutathione derivative biosynthetic process [GO:1901687]; glutathione metabolic process [GO:0006749]; nitrobenzene metabolic process [GO:0018916]; response to estrogen [GO:0043627]; xenobiotic catabolic process [GO:0042178]	enzyme binding [GO:0019899]; glutathione binding [GO:0043295]; glutathione transferase activity [GO:0004364]; identical protein binding [GO:0042802]; protein homodimerization activity [GO:0042803]	cytoplasm [GO:0005737]; cytosol [GO:0005829]; extracellular exosome [GO:0070062]; intercellular bridge [GO:0045171]; nucleus [GO:0005634]; sperm fibrous sheath [GO:0035686]	GO:0004364; GO:0005634; GO:0005737; GO:0005829; GO:0006749; GO:0008065; GO:0018916; GO:0019899; GO:0035686; GO:0042178; GO:0042802; GO:0042803; GO:0043295; GO:0043627; GO:0045171; GO:0070062; GO:0070458; GO:1901687	R-HSA-156590;	hsa:2947;	19.5919	19.6812	19.6666	19.7638	19.6763	20.4382	20.5381	20.5575	20.4943	20.7376
NIPSNAP3A_Q9UFN0	-0.876842	-0.877039	-1.01791	-0.677267	-1.21297	0.902523	0.995387	0.753618	0.780011	1.23049	NIPSNAP3A	Protein NipSnap homolog 3A	Q9UFN0	1.05969	1.05496e-08	9.05479e-07	-0.968369		SUBCELLULAR LOCATION: Cytoplasm, cytosol {ECO:0000269|PubMed:12427096}. Note=May be part of some vesicular structure distinct from lysosomal vesicles.				cytosol [GO:0005829]; mitochondrion [GO:0005739]; nucleus [GO:0005634]	GO:0005634; GO:0005739; GO:0005829		hsa:25934;	16.2527	16.2526	16.1794	16.3563	16.0781	17.1767	17.2249	17.0994	17.1131	17.347
CALCOCO2_Q13137	-0.798813	-1.08593	-1.02782	-0.886588	-0.890146	0.79686	0.846287	0.996157	0.797975	1.25202	CALCOCO2	Calcium-binding and coiled-coil domain-containing protein 2	Q13137	1.02368	1.06497e-08	9.05479e-07	-0.443418	FUNCTION: Xenophagy-specific receptor required for autophagy-mediated intracellular bacteria degradation. Acts as an effector protein of galectin-sensed membrane damage that restricts the proliferation of infecting pathogens such as Salmonella typhimurium upon entry into the cytosol by targeting LGALS8-associated bacteria for autophagy (PubMed:22246324). Initially orchestrates bacteria targeting …	SUBCELLULAR LOCATION: Cytoplasm, perinuclear region {ECO:0000269|PubMed:12869526, ECO:0000269|PubMed:17635994, ECO:0000269|PubMed:9230084}. Cytoplasm, cytoskeleton {ECO:0000269|PubMed:17635994}. Cytoplasmic vesicle, autophagosome membrane {ECO:0000269|PubMed:25771791}; Peripheral membrane protein {ECO:0000305}. Note=According to PubMed:7540613, localizes to nuclear dots. According to PubMed:92300…		positive regulation of autophagosome maturation [GO:1901098]; response to interferon-gamma [GO:0034341]; viral process [GO:0016032]; xenophagy [GO:0098792]	protein homodimerization activity [GO:0042803]	autophagosome [GO:0005776]; autophagosome membrane [GO:0000421]; cytoplasm [GO:0005737]; cytoplasmic vesicle [GO:0031410]; cytoskeleton [GO:0005856]; cytosol [GO:0005829]; intracellular membrane-bounded organelle [GO:0043231]; membrane [GO:0016020]; nucleus [GO:0005634]; perinuclear region of cytoplasm [GO:0048471]	GO:0000421; GO:0005634; GO:0005737; GO:0005776; GO:0005829; GO:0005856; GO:0016020; GO:0016032; GO:0031410; GO:0034341; GO:0042803; GO:0043231; GO:0048471; GO:0098792; GO:1901098		hsa:10241;	18.7584	18.6905	18.7042	18.7376	18.7368	19.1356	19.1473	19.1827	19.1359	19.2432
DCUN1D1_Q96GG9	-0.933355	-1.03954	-1.14683	-0.611425	-0.942315	0.950193	0.821046	0.890084	0.809069	1.20307	DCUN1D1	DCN1-like protein 1;DCN1-like protein	Q96GG9	1.03317	1.08307e-08	9.10037e-07	-0.595789	FUNCTION: Part of an E3 ubiquitin ligase complex for neddylation. Promotes neddylation of cullin components of E3 cullin-RING ubiquitin ligase complexes. Acts by binding to cullin-RBX1 complexes in the cytoplasm and promoting their nuclear translocation, enhancing recruitment of E2-NEDD8 (UBE2M-NEDD8) thioester to the complex, and optimizing the orientation of proteins in the complex to allow eff…	SUBCELLULAR LOCATION: Nucleus {ECO:0000269|PubMed:25349211}.		positive regulation of protein neddylation [GO:2000436]; positive regulation of ubiquitin-protein transferase activity [GO:0051443]; post-translational protein modification [GO:0043687]; protein neddylation [GO:0045116]	cullin family protein binding [GO:0097602]; ubiquitin conjugating enzyme binding [GO:0031624]; ubiquitin-like protein binding [GO:0032182]	cytosol [GO:0005829]; nucleoplasm [GO:0005654]; ubiquitin ligase complex [GO:0000151]	GO:0000151; GO:0005654; GO:0005829; GO:0031624; GO:0032182; GO:0043687; GO:0045116; GO:0051443; GO:0097602; GO:2000436	R-HSA-8951664;	hsa:54165;	17.9632	17.9294	17.8952	18.0658	17.9603	18.5635	18.5223	18.5443	18.5185	18.6441
RDX_P35241	-0.841494	-0.661132	-0.844278	-1.14754	-1.18483	0.951147	0.883912	0.968011	0.799858	1.07635	RDX	Radixin	P35241	1.02457	1.10762e-08	9.10892e-07	-0.518014	FUNCTION: Probably plays a crucial role in the binding of the barbed end of actin filaments to the plasma membrane.	SUBCELLULAR LOCATION: Cell membrane; Peripheral membrane protein; Cytoplasmic side. Cytoplasm, cytoskeleton. Cleavage furrow. Cell projection, microvillus {ECO:0000250|UniProtKB:P26043}. Note=Highly concentrated in the undercoat of the cell-to-cell adherens junction and the cleavage furrow in the interphase and mitotic phase, respectively.	DISEASE: Deafness, autosomal recessive, 24 (DFNB24) [MIM:611022]: A form of non-syndromic sensorineural hearing loss. Sensorineural deafness results from damage to the neural receptors of the inner ear, the nerve pathways to the brain, or the area of the brain that receives sound information. {ECO:0000269|PubMed:17226784}. Note=The disease is caused by mutations affecting the gene represented in …	apical protein localization [GO:0045176]; barbed-end actin filament capping [GO:0051016]; cellular response to platelet-derived growth factor stimulus [GO:0036120]; cellular response to thyroid hormone stimulus [GO:0097067]; establishment of endothelial barrier [GO:0061028]; establishment of protein localization [GO:0045184]; microvillus assembly [GO:0030033]; negative regulation of adherens junc…	actin binding [GO:0003779]; ATPase binding [GO:0051117]; cadherin binding [GO:0045296]; protein domain specific binding [GO:0019904]; protein homodimerization activity [GO:0042803]; protein kinase A binding [GO:0051018]; RNA binding [GO:0003723]	apical plasma membrane [GO:0016324]; cell-cell adherens junction [GO:0005913]; cell periphery [GO:0071944]; cell tip [GO:0051286]; cleavage furrow [GO:0032154]; cortical actin cytoskeleton [GO:0030864]; extracellular exosome [GO:0070062]; extracellular space [GO:0005615]; filopodium [GO:0030175]; focal adhesion [GO:0005925]; lamellipodium [GO:0030027]; microvillus [GO:0005902]; midbody [GO:003049…	GO:0001726; GO:0003723; GO:0003779; GO:0005615; GO:0005886; GO:0005902; GO:0005913; GO:0005925; GO:0008360; GO:0008361; GO:0010628; GO:0010737; GO:0016324; GO:0019904; GO:0030027; GO:0030033; GO:0030175; GO:0030315; GO:0030335; GO:0030496; GO:0030864; GO:0032154; GO:0032231; GO:0032420; GO:0032487; GO:0034111; GO:0034260; GO:0036120; GO:0042803; GO:0043087; GO:0045176; GO:0045184; GO:0045296; GO:…	R-HSA-437239;	hsa:5962;	21.107	21.1569	21.1062	21.0223	21.012	21.6031	21.5845	21.6078	21.5613	21.6378
NADSYN1_Q6IA69	-0.808934	-0.678551	-0.97961	-1.15638	-1.06035	0.773392	0.811018	1.09294	1.02048	0.985999	NADSYN1	Glutamine-dependent NAD(+) synthetase	Q6IA69	1.02962	1.11185e-08	9.10892e-07	-0.47662	FUNCTION: Catalyzes the ATP-dependent amidation of deamido-NAD to form NAD (PubMed:12547821). Uses L-glutamine as a nitrogen source (PubMed:12547821). {ECO:0000269|PubMed:12547821}.			NAD biosynthetic process [GO:0009435]; NAD metabolic process [GO:0019674]	ATP binding [GO:0005524]; glutaminase activity [GO:0004359]; NAD+ synthase (glutamine-hydrolyzing) activity [GO:0003952]	cytoplasm [GO:0005737]; cytosol [GO:0005829]	GO:0003952; GO:0004359; GO:0005524; GO:0005737; GO:0005829; GO:0009435; GO:0019674	R-HSA-196807;	hsa:55191;	16.1247	16.1578	16.0812	16.0363	16.0607	16.5272	16.5368	16.6085	16.5901	16.5813
ECH1_Q13011	-0.847166	-0.882262	-0.976956	-0.827133	-1.1668	0.892647	0.820539	0.887111	0.905474	1.19455	ECH1	Delta(3,5)-Delta(2,4)-dienoyl-CoA isomerase, mitochondrial	Q13011	1.01986	1.12235e-08	9.10892e-07	-0.383003	FUNCTION: Isomerization of 3-trans,5-cis-dienoyl-CoA to 2-trans,4-trans-dienoyl-CoA. {ECO:0000250}.	SUBCELLULAR LOCATION: Mitochondrion {ECO:0000250}. Peroxisome {ECO:0000250}.		fatty acid beta-oxidation [GO:0006635]; protein targeting to peroxisome [GO:0006625]	delta3,5-delta2,4-dienoyl-CoA isomerase activity [GO:0051750]	cytosol [GO:0005829]; extracellular exosome [GO:0070062]; membrane [GO:0016020]; mitochondrion [GO:0005739]; peroxisomal matrix [GO:0005782]; peroxisome [GO:0005777]	GO:0005739; GO:0005777; GO:0005782; GO:0005829; GO:0006625; GO:0006635; GO:0016020; GO:0051750; GO:0070062	R-HSA-9033241;	hsa:1891;	19.3059	19.2987	19.2794	19.31	19.2408	19.6603	19.6456	19.6592	19.6629	19.7218
CLTC_K7EJJ5	-0.901736	-1.00535	-0.81283	-0.718128	-1.21792	1.01486	0.884757	1.00103	0.593907	1.16142	CLTC		K7EJJ5	1.09967	1.20357e-08	9.65829e-07	-1.39756				intracellular protein transport [GO:0006886]; vesicle-mediated transport [GO:0016192]		endosome [GO:0005768]; lysosome [GO:0005764]; mitotic spindle [GO:0072686]	GO:0005764; GO:0005768; GO:0006886; GO:0016192; GO:0072686			14.0441	13.9663	14.1108	14.1818	13.8068	15.4823	15.3847	15.4719	15.1664	15.5923
EFHD1_Q9BUP0	-0.595217	-0.821	-1.26523	-0.879036	-1.09261	0.913824	0.96459	1.00043	0.708243	1.06601	EFHD1	EF-hand domain-containing protein D1	Q9BUP0	1.18966	1.23485e-08	9.75357e-07	-2.55005	FUNCTION: Acts as a calcium sensor for mitochondrial flash (mitoflash) activation, an event characterized by stochastic bursts of superoxide production (PubMed:26975899). May play a role in neuronal differentiation (By similarity). {ECO:0000250|UniProtKB:Q9D4J1, ECO:0000269|PubMed:26975899}.	SUBCELLULAR LOCATION: Mitochondrion inner membrane {ECO:0000250|UniProtKB:Q9D4J1}.		neuron projection development [GO:0031175]; regulation of cellular hyperosmotic salinity response [GO:1900069]	calcium ion sensor activity [GO:0061891]	mitochondrial inner membrane [GO:0005743]; mitochondrion [GO:0005739]	GO:0005739; GO:0005743; GO:0031175; GO:0061891; GO:1900069		hsa:80303;	13.9048	13.5954	12.9868	13.5159	13.2233	15.9723	16.0418	16.0909	15.6906	16.1808
BCAP29_Q9UHQ4	-0.97026	-1.19064	-0.876671	-0.549286	-1.08046	0.972256	0.980627	1.01092	0.743447	0.960063	BCAP29	B-cell receptor-associated protein 29	Q9UHQ4	1.03629	1.24275e-08	9.75357e-07	-0.663021	FUNCTION: May play a role in anterograde transport of membrane proteins from the endoplasmic reticulum to the Golgi. May be involved in CASP8-mediated apoptosis (By similarity). {ECO:0000250}.	SUBCELLULAR LOCATION: Endoplasmic reticulum membrane {ECO:0000250}; Multi-pass membrane protein {ECO:0000250}.		apoptotic process [GO:0006915]; endoplasmic reticulum to Golgi vesicle-mediated transport [GO:0006888]; intracellular protein transport [GO:0006886]; osteoblast differentiation [GO:0001649]; protein localization to endoplasmic reticulum exit site [GO:0070973]		endoplasmic reticulum membrane [GO:0005789]; integral component of plasma membrane [GO:0005887]; membrane [GO:0016020]	GO:0001649; GO:0005789; GO:0005887; GO:0006886; GO:0006888; GO:0006915; GO:0016020; GO:0070973		hsa:55973;	18.2566	18.1784	18.2899	18.4061	18.2175	18.9465	18.9495	18.9602	18.8652	18.9422
STARD13_Q9Y3M8	-1.01645	-0.951594	-0.809148	-1.01314	-0.918062	0.852265	0.960806	1.09414	0.715518	1.08566	STARD13	StAR-related lipid transfer protein 13	Q9Y3M8	1.01933	1.27049e-08	9.8629e-07	-0.346982	FUNCTION: GTPase-activating protein for RhoA, and perhaps for Cdc42. May be involved in regulation of cytoskeletal reorganization, cell proliferation and cell motility. Acts a tumor suppressor in hepatocellular carcinoma cells. {ECO:0000269|PubMed:14697242, ECO:0000269|PubMed:16217026}.	SUBCELLULAR LOCATION: Cytoplasm. Membrane; Peripheral membrane protein; Cytoplasmic side. Mitochondrion membrane; Peripheral membrane protein; Cytoplasmic side. Lipid droplet.		endothelial cell migration [GO:0043542]; endothelial tube lumen extension [GO:0097498]; negative regulation of cell migration involved in sprouting angiogenesis [GO:0090051]; regulation of small GTPase mediated signal transduction [GO:0051056]; signal transduction [GO:0007165]	GTPase activator activity [GO:0005096]; lipid binding [GO:0008289]	cytosol [GO:0005829]; lipid droplet [GO:0005811]; mitochondrial membrane [GO:0031966]	GO:0005096; GO:0005811; GO:0005829; GO:0007165; GO:0008289; GO:0031966; GO:0043542; GO:0051056; GO:0090051; GO:0097498	R-HSA-194840;	hsa:90627;	17.9358	17.9478	17.974	17.9364	17.954	18.2801	18.3001	18.3247	18.2549	18.3231
ARF4_P18085	-1.2409	-0.813126	-0.796455	-1.07054	-0.756598	0.85925	0.869582	1.16101	0.94714	0.840636	ARF4	ADP-ribosylation factor 4	P18085	1.02701	1.29556e-08	9.94936e-07	-0.506492	FUNCTION: GTP-binding protein that functions as an allosteric activator of the cholera toxin catalytic subunit, an ADP-ribosyltransferase. Involved in protein trafficking; may modulate vesicle budding and uncoating within the Golgi apparatus.	SUBCELLULAR LOCATION: Golgi apparatus. Membrane {ECO:0000305}; Lipid-anchor {ECO:0000305}.		activation of phospholipase D activity [GO:0031584]; apical protein localization [GO:0045176]; brain development [GO:0007420]; cell migration [GO:0016477]; dendritic spine development [GO:0060996]; endoplasmic reticulum to Golgi vesicle-mediated transport [GO:0006888]; epidermal growth factor receptor signaling pathway [GO:0007173]; establishment or maintenance of epithelial cell apical/basal pol…	ARF guanyl-nucleotide exchange factor activity [GO:0005086]; epidermal growth factor receptor binding [GO:0005154]; GTPase activity [GO:0003924]; GTP binding [GO:0005525]	cytoplasm [GO:0005737]; cytosol [GO:0005829]; dendritic spine [GO:0043197]; extracellular exosome [GO:0070062]; glutamatergic synapse [GO:0098978]; Golgi apparatus [GO:0005794]; membrane [GO:0016020]; ruffle membrane [GO:0032587]	GO:0003924; GO:0005086; GO:0005154; GO:0005525; GO:0005737; GO:0005794; GO:0005829; GO:0006471; GO:0006886; GO:0006888; GO:0006890; GO:0007173; GO:0007420; GO:0007612; GO:0016020; GO:0016192; GO:0016477; GO:0031584; GO:0032587; GO:0043066; GO:0043197; GO:0045176; GO:0045197; GO:0045944; GO:0048678; GO:0060996; GO:0061512; GO:0070062; GO:0098978; GO:0099175; GO:2000377	R-HSA-5620916;R-HSA-6807878;R-HSA-6811434;	hsa:378;	18.669	18.7848	18.7894	18.7152	18.8001	19.2376	19.2404	19.3192	19.2613	19.2325
ARF5_C9J1Z8	-1.11104	-0.96493	-0.806653	-0.581789	-1.19865	0.887811	0.822225	1.01099	0.836055	1.10598	ARF5	ADP-ribosylation factor 5	C9J1Z8	1.04282	1.34791e-08	1.02412e-06	-0.732033					GTP binding [GO:0005525]		GO:0005525			17.026	17.0833	17.1454	17.2337	16.9916	17.8104	17.7847	17.8588	17.7901	17.8961
COL8A1_P27658	-1.02651	-0.921759	-1.0427	-0.716903	-0.957904	0.872974	0.883473	0.719355	0.850262	1.33972	COL8A1	Collagen alpha-1(VIII) chain;Vastatin	P27658	1.03854	1.45958e-08	1.08775e-06	-0.63449	FUNCTION: Macromolecular component of the subendothelium. Major component of the Descemet's membrane (basement membrane) of corneal endothelial cells. Also component of the endothelia of blood vessels. Necessary for migration and proliferation of vascular smooth muscle cells and thus, has a potential role in the maintenance of vessel wall integrity and structure, in particular in atherogenesis. {…	SUBCELLULAR LOCATION: Secreted, extracellular space, extracellular matrix, basement membrane.		angiogenesis [GO:0001525]; camera-type eye morphogenesis [GO:0048593]; cell adhesion [GO:0007155]; endodermal cell differentiation [GO:0035987]; epithelial cell proliferation [GO:0050673]; extracellular matrix organization [GO:0030198]; positive regulation of cell-substrate adhesion [GO:0010811]	extracellular matrix structural constituent [GO:0005201]	collagen-containing extracellular matrix [GO:0062023]; collagen type VIII trimer [GO:0005591]; endoplasmic reticulum lumen [GO:0005788]; extracellular matrix [GO:0031012]; extracellular region [GO:0005576]; extracellular space [GO:0005615]	GO:0001525; GO:0005201; GO:0005576; GO:0005591; GO:0005615; GO:0005788; GO:0007155; GO:0010811; GO:0030198; GO:0031012; GO:0035987; GO:0048593; GO:0050673; GO:0062023	R-HSA-1442490;R-HSA-1650814;R-HSA-2022090;R-HSA-216083;R-HSA-8948216;	hsa:1295;	16.4329	16.4685	16.4274	16.5382	16.4562	17.0787	17.0822	17.0265	17.071	17.2374
IDH1_O75874	-0.805233	-0.955193	-1.0199	-0.993739	-0.914097	0.783077	0.804827	1.04994	0.789895	1.26042	IDH1	Isocitrate dehydrogenase [NADP] cytoplasmic	O75874	1.01998	1.49666e-08	1.08775e-06	-0.414187		SUBCELLULAR LOCATION: Cytoplasm, cytosol {ECO:0000269|PubMed:10521434}. Peroxisome {ECO:0000269|PubMed:10521434}.	DISEASE: Glioma (GLM) [MIM:137800]: Gliomas are benign or malignant central nervous system neoplasms derived from glial cells. They comprise astrocytomas and glioblastoma multiforme that are derived from astrocytes, oligodendrogliomas derived from oligodendrocytes and ependymomas derived from ependymocytes. {ECO:0000269|PubMed:19117336, ECO:0000269|PubMed:19935646}. Note=The gene represented in t…	2-oxoglutarate metabolic process [GO:0006103]; female gonad development [GO:0008585]; glutathione metabolic process [GO:0006749]; glyoxylate cycle [GO:0006097]; isocitrate metabolic process [GO:0006102]; NADPH regeneration [GO:0006740]; NADP metabolic process [GO:0006739]; neutrophil degranulation [GO:0043312]; protein targeting to peroxisome [GO:0006625]; regulation of phospholipid biosynthetic …	cadherin binding [GO:0045296]; identical protein binding [GO:0042802]; isocitrate dehydrogenase (NADP+) activity [GO:0004450]; magnesium ion binding [GO:0000287]; NAD binding [GO:0051287]; NADP binding [GO:0050661]; protein homodimerization activity [GO:0042803]	cytoplasm [GO:0005737]; cytosol [GO:0005829]; extracellular exosome [GO:0070062]; extracellular region [GO:0005576]; ficolin-1-rich granule lumen [GO:1904813]; mitochondrion [GO:0005739]; peroxisomal matrix [GO:0005782]; peroxisome [GO:0005777]; secretory granule lumen [GO:0034774]; tertiary granule lumen [GO:1904724]	GO:0000287; GO:0004450; GO:0005576; GO:0005737; GO:0005739; GO:0005777; GO:0005782; GO:0005829; GO:0006097; GO:0006099; GO:0006102; GO:0006103; GO:0006625; GO:0006739; GO:0006740; GO:0006749; GO:0006979; GO:0008585; GO:0034774; GO:0042802; GO:0042803; GO:0043312; GO:0045296; GO:0048545; GO:0050661; GO:0051287; GO:0060696; GO:0070062; GO:0071071; GO:1904724; GO:1904813	R-HSA-2978092;R-HSA-389542;R-HSA-6798695;R-HSA-9033241;	hsa:3417;	20.7636	20.7304	20.7161	20.7219	20.7395	21.1144	21.1192	21.1733	21.1159	21.2198
CPPED1_Q9BRF8	-0.839751	-0.963693	-1.0571	-0.982232	-0.817321	0.711893	0.943989	0.828179	0.801221	1.37481	CPPED1	Serine/threonine-protein phosphatase CPPED1	Q9BRF8	1.04895	1.49851e-08	1.08775e-06	-0.76319	FUNCTION: Protein phosphatase that dephosphorylates AKT family kinase specifically at 'Ser-473', blocking cell cycle progression and promoting cell apoptosis. May play an inhibitory role in glucose uptake by adipocytes. {ECO:0000269|PubMed:23799035, ECO:0000269|PubMed:23939394}.	SUBCELLULAR LOCATION: Cytoplasm {ECO:0000269|PubMed:23799035}.		neutrophil degranulation [GO:0043312]	metal ion binding [GO:0046872]; phosphoprotein phosphatase activity [GO:0004721]	azurophil granule lumen [GO:0035578]; cytosol [GO:0005829]; extracellular region [GO:0005576]; plasma membrane [GO:0005886]	GO:0004721; GO:0005576; GO:0005829; GO:0005886; GO:0035578; GO:0043312; GO:0046872	R-HSA-6798695;	hsa:55313;	15.6283	15.5776	15.5393	15.57	15.6375	16.2636	16.3586	16.3112	16.3002	16.535
PABPC1_P11940	-0.790228	-1.15944	-0.985409	-0.752559	-1.00536	0.708475	0.968885	1.03554	1.05973	0.920361	PABPC1	Polyadenylate-binding protein 1;Polyadenylate-binding protein	P11940	1.01733	1.51189e-08	1.08775e-06	-0.390468	FUNCTION: Binds the poly(A) tail of mRNA, including that of its own transcript, and regulates processes of mRNA metabolism such as pre-mRNA splicing and mRNA stability (PubMed:11051545, PubMed:17212783, PubMed:25480299). Its function in translational initiation regulation can either be enhanced by PAIP1 or repressed by PAIP2 (PubMed:11051545, PubMed:20573744). Can probably bind to cytoplasmic RNA…	SUBCELLULAR LOCATION: Cytoplasm {ECO:0000269|PubMed:20573744, ECO:0000269|PubMed:7908267, ECO:0000269|PubMed:9582337}. Nucleus {ECO:0000269|PubMed:18799579, ECO:0000269|PubMed:9582337}. Note=Localized in cytoplasmic mRNP granules containing untranslated mRNAs (PubMed:17289661). Shuttles between the cytoplasm and the nucleus (PubMed:9582337). {ECO:0000269|PubMed:17289661, ECO:0000269|PubMed:958233…		gene silencing by RNA [GO:0031047]; mRNA polyadenylation [GO:0006378]; mRNA splicing, via spliceosome [GO:0000398]; mRNA stabilization [GO:0048255]; negative regulation of nuclear-transcribed mRNA catabolic process, nonsense-mediated decay [GO:2000623]; nuclear-transcribed mRNA catabolic process, nonsense-mediated decay [GO:0000184]; positive regulation of nuclear-transcribed mRNA catabolic proce…	mRNA 3'-UTR binding [GO:0003730]; poly(A) binding [GO:0008143]; poly(U) RNA binding [GO:0008266]; protein C-terminus binding [GO:0008022]; RNA binding [GO:0003723]; translation activator activity [GO:0008494]	catalytic step 2 spliceosome [GO:0071013]; cytoplasm [GO:0005737]; cytoplasmic ribonucleoprotein granule [GO:0036464]; cytoplasmic stress granule [GO:0010494]; cytosol [GO:0005829]; extracellular exosome [GO:0070062]; focal adhesion [GO:0005925]; membrane [GO:0016020]; nucleus [GO:0005634]; ribonucleoprotein complex [GO:1990904]	GO:0000184; GO:0000398; GO:0003723; GO:0003730; GO:0005634; GO:0005737; GO:0005829; GO:0005925; GO:0006378; GO:0006413; GO:0008022; GO:0008143; GO:0008266; GO:0008494; GO:0010494; GO:0016020; GO:0031047; GO:0036464; GO:0043488; GO:0045070; GO:0048255; GO:0060213; GO:0070062; GO:0071013; GO:1900153; GO:1990904; GO:2000623	R-HSA-156827;R-HSA-429947;R-HSA-450408;R-HSA-72649;R-HSA-9010553;R-HSA-975956;R-HSA-975957;	hsa:26986;	22.5569	22.4801	22.5163	22.5647	22.5121	22.8686	22.9228	22.9367	22.9417	22.9127
AP3B1_O00203	-0.933853	-0.906826	-0.959968	-0.881799	-1.02275	0.787505	1.0979	0.899329	0.757715	1.16275	AP3B1	AP-3 complex subunit beta-1	O00203	1.0169	1.518e-08	1.08775e-06	-0.346451	FUNCTION: Subunit of non-clathrin- and clathrin-associated adaptor protein complex 3 (AP-3) that plays a role in protein sorting in the late-Golgi/trans-Golgi network (TGN) and/or endosomes. The AP complexes mediate both the recruitment of clathrin to membranes and the recognition of sorting signals within the cytosolic tails of transmembrane cargo molecules. AP-3 appears to be involved in the so…	SUBCELLULAR LOCATION: Cytoplasmic vesicle, clathrin-coated vesicle membrane {ECO:0000250}; Peripheral membrane protein {ECO:0000250}; Cytoplasmic side {ECO:0000250}. Golgi apparatus {ECO:0000250}. Note=Component of the coat surrounding the cytoplasmic face of coated vesicles located at the Golgi complex. {ECO:0000250}.	DISEASE: Hermansky-Pudlak syndrome 2 (HPS2) [MIM:608233]: A form of Hermansky-Pudlak syndrome, a genetically heterogeneous autosomal recessive disorder characterized by oculocutaneous albinism, bleeding due to platelet storage pool deficiency, and lysosomal storage defects. This syndrome results from defects of diverse cytoplasmic organelles including melanosomes, platelet dense granules and lyso…	anterograde axonal transport [GO:0008089]; anterograde synaptic vesicle transport [GO:0048490]; antigen processing and presentation, exogenous lipid antigen via MHC class Ib [GO:0048007]; blood coagulation [GO:0007596]; intracellular protein transport [GO:0006886]; melanosome organization [GO:0032438]; positive regulation of NK T cell differentiation [GO:0051138]; protein targeting to lysosome [G…	GTP-dependent protein binding [GO:0030742]; protein phosphatase binding [GO:0019903]	AP-3 adaptor complex [GO:0030123]; axon cytoplasm [GO:1904115]; cell [GO:0005623]; clathrin adaptor complex [GO:0030131]; clathrin-coated vesicle membrane [GO:0030665]; Golgi apparatus [GO:0005794]; lysosomal membrane [GO:0005765]; membrane [GO:0016020]; synapse [GO:0045202]	GO:0005623; GO:0005765; GO:0005794; GO:0006622; GO:0006886; GO:0007596; GO:0008089; GO:0016020; GO:0016182; GO:0016192; GO:0019903; GO:0030123; GO:0030131; GO:0030665; GO:0030742; GO:0032438; GO:0045202; GO:0048007; GO:0048490; GO:0051138; GO:1904115	R-HSA-432722;R-HSA-6802952;	hsa:8546;	20.4994	20.5043	20.4945	20.5089	20.483	20.8162	20.8734	20.8368	20.8107	20.8853
MPP7_U5GXS2	-0.948578	-0.893992	-0.902545	-0.752664	-1.15596	1.18985	0.638408	1.14922	0.70637	0.969885	MPP7	MAGUK p55 subfamily member 7	U5GXS2	1.08531	1.52303e-08	1.08775e-06	-1.10546						cell junction [GO:0030054]; nucleoplasm [GO:0005654]	GO:0005654; GO:0030054			12.9476	12.98	12.9749	13.0639	12.8244	14.2175	13.89	14.1934	13.9304	14.0869
KMT2C_Q8NEZ4	-0.940559	-1.01556	-0.64773	-0.944143	-1.10373	0.752531	0.921869	0.869057	0.770398	1.33787	KMT2C	Histone-lysine N-methyltransferase 2C	Q8NEZ4	1.08996	1.56262e-08	1.10171e-06	-1.30131	FUNCTION: Histone methyltransferase that methylates 'Lys-4' of histone H3 (PubMed:22266653). H3 'Lys-4' methylation represents a specific tag for epigenetic transcriptional activation. Central component of the MLL2/3 complex, a coactivator complex of nuclear receptors, involved in transcriptional coactivation. KMT2C/MLL3 may be a catalytic subunit of this complex. May be involved in leukemogenesi…	SUBCELLULAR LOCATION: Nucleus {ECO:0000305}.	DISEASE: Kleefstra syndrome 2 (KLEFS2) [MIM:617768]: A form of Kleefstra syndrome, an autosomal dominant disease characterized by variable mental retardation, psychomotor developmental delay, seizures, behavioral abnormalities, and facial dysmorphisms. {ECO:0000269|PubMed:22726846, ECO:0000269|PubMed:29069077}. Note=The disease is caused by mutations affecting the gene represented in this entry.	positive regulation of transcription by RNA polymerase II [GO:0045944]; regulation of megakaryocyte differentiation [GO:0045652]	DNA binding [GO:0003677]; histone binding [GO:0042393]; histone methyltransferase activity (H3-K4 specific) [GO:0042800]; metal ion binding [GO:0046872]; RNA binding [GO:0003723]; transcription coactivator activity [GO:0003713]; transferase activity, transferring acyl groups [GO:0016746]	histone methyltransferase complex [GO:0035097]; MLL3/4 complex [GO:0044666]; nucleoplasm [GO:0005654]; nucleus [GO:0005634]	GO:0003677; GO:0003713; GO:0003723; GO:0005634; GO:0005654; GO:0016746; GO:0035097; GO:0042393; GO:0042800; GO:0044666; GO:0045652; GO:0045944; GO:0046872	R-HSA-3214841;R-HSA-5617472;R-HSA-8936459;	hsa:58508;	14.4578	14.4054	14.6626	14.4553	14.3437	15.6419	15.7604	15.7234	15.6544	16.0513
PGGT1B_P53609	-0.749057	-0.915456	-1.2771	-0.91993	-0.7974	0.963434	0.759589	0.843553	0.843693	1.24867	PGGT1B	Geranylgeranyl transferase type-1 subunit beta	P53609	1.04624	1.57343e-08	1.10171e-06	-0.771243	FUNCTION: Catalyzes the transfer of a geranyl-geranyl moiety from geranyl-geranyl pyrophosphate to a cysteine at the fourth position from the C-terminus of proteins having the C-terminal sequence Cys-aliphatic-aliphatic-X. Known substrates include RAC1, RAC2, RAP1A and RAP1B. {ECO:0000269|PubMed:8106351}.			negative regulation of nitric-oxide synthase biosynthetic process [GO:0051771]; positive regulation of cell cycle [GO:0045787]; positive regulation of cell population proliferation [GO:0008284]; protein geranylgeranylation [GO:0018344]; protein prenylation [GO:0018342]; response to cytokine [GO:0034097]	CAAX-protein geranylgeranyltransferase activity [GO:0004662]; drug binding [GO:0008144]; isoprenoid binding [GO:0019840]; peptide binding [GO:0042277]; protein geranylgeranyltransferase activity [GO:0004661]; zinc ion binding [GO:0008270]	CAAX-protein geranylgeranyltransferase complex [GO:0005953]	GO:0004661; GO:0004662; GO:0005953; GO:0008144; GO:0008270; GO:0008284; GO:0018342; GO:0018344; GO:0019840; GO:0034097; GO:0042277; GO:0045787; GO:0051771		hsa:5229;	16.7541	16.6852	16.5356	16.6834	16.7341	17.4628	17.3785	17.4132	17.4133	17.5809
MRE11A_P49959	-0.865625	-1.03588	-0.752048	-0.83439	-1.17014	0.829539	0.954509	1.07192	0.605584	1.19652	MRE11A	Double-strand break repair protein MRE11A	P49959	1.05875	1.61173e-08	1.11757e-06	-0.785403	FUNCTION: Component of the MRN complex, which plays a central role in double-strand break (DSB) repair, DNA recombination, maintenance of telomere integrity and meiosis (PubMed:9651580, PubMed:9590181, PubMed:9705271, PubMed:11741547, PubMed:29670289). The complex possesses single-strand endonuclease activity and double-strand-specific 3'-5' exonuclease activity, which are provided by MRE11 (PubM…	SUBCELLULAR LOCATION: Nucleus {ECO:0000269|PubMed:10783165, ECO:0000269|PubMed:26215093}. Chromosome, telomere {ECO:0000269|PubMed:10888888}. Chromosome {ECO:0000269|PubMed:26215093, ECO:0000269|PubMed:30612738}. Note=Localizes to discrete nuclear foci after treatment with genotoxic agents. {ECO:0000269|PubMed:10783165, ECO:0000269|PubMed:26215093, ECO:0000269|PubMed:30612738}.	DISEASE: Ataxia-telangiectasia-like disorder 1 (ATLD1) [MIM:604391]: A rare disorder characterized by progressive cerebellar ataxia, dysarthria, abnormal eye movements, and absence of telangiectasia. ATLD patients show normal levels of total IgG, IgA and IgM, although there may be reduced levels of specific functional antibodies. At the cellular level, ATLD exhibits hypersensitivity to ionizing r…	cell population proliferation [GO:0008283]; cellular response to DNA damage stimulus [GO:0006974]; DNA double-strand break processing [GO:0000729]; DNA duplex unwinding [GO:0032508]; DNA recombination [GO:0006310]; DNA repair [GO:0006281]; DNA replication [GO:0006260]; DNA strand resection involved in replication fork processing [GO:0110025]; double-strand break repair [GO:0006302]; double-strand…	3'-5' exonuclease activity [GO:0008408]; 5'-3' exonuclease activity [GO:0008409]; cadherin binding [GO:0045296]; double-stranded DNA binding [GO:0003690]; endodeoxyribonuclease activity [GO:0004520]; identical protein binding [GO:0042802]; manganese ion binding [GO:0030145]; nuclease activity [GO:0004518]; protein C-terminus binding [GO:0008022]; single-stranded DNA endodeoxyribonuclease activity…	cytoplasm [GO:0005737]; cytosol [GO:0005829]; Mre11 complex [GO:0030870]; nuclear chromosome, telomeric region [GO:0000784]; nucleoplasm [GO:0005654]; nucleus [GO:0005634]; PML body [GO:0016605]; replication fork [GO:0005657]; site of double-strand break [GO:0035861]	GO:0000014; GO:0000019; GO:0000723; GO:0000724; GO:0000729; GO:0000784; GO:0003690; GO:0004518; GO:0004520; GO:0005634; GO:0005654; GO:0005657; GO:0005737; GO:0005829; GO:0006260; GO:0006281; GO:0006302; GO:0006303; GO:0006310; GO:0006974; GO:0007004; GO:0007062; GO:0007095; GO:0007129; GO:0007131; GO:0008022; GO:0008283; GO:0008408; GO:0008409; GO:0016032; GO:0016605; GO:0030145; GO:0030870; GO:…	R-HSA-1834949;R-HSA-2559586;R-HSA-3270619;R-HSA-5685938;R-HSA-5685939;R-HSA-5685942;R-HSA-5693548;R-HSA-5693554;R-HSA-5693565;R-HSA-5693568;R-HSA-5693571;R-HSA-5693579;R-HSA-5693607;R-HSA-5693616;R-HSA-6804756;R-HSA-69473;R-HSA-912446;	hsa:4361;	13.3965	13.3248	13.4444	13.4097	13.2682	14.1111	14.1638	14.2133	14.0167	14.2658
SPTAN1_Q13813	-1.03831	-1.08728	-0.817774	-0.771861	-0.968976	0.646813	0.858437	1.06569	0.977869	1.13539	SPTAN1	Spectrin alpha chain, non-erythrocytic 1	Q13813	1.01822	1.68883e-08	1.15977e-06	-0.422926	FUNCTION: Fodrin, which seems to be involved in secretion, interacts with calmodulin in a calcium-dependent manner and is thus candidate for the calcium-dependent movement of the cytoskeleton at the membrane.	SUBCELLULAR LOCATION: Cytoplasm, cytoskeleton. Cytoplasm, cell cortex. Note=Expressed along the cell membrane in podocytes and presumptive tubule cells during glomerulogenesis and is expressed along lateral cell margins in tubule cells. {ECO:0000250}.	DISEASE: Epileptic encephalopathy, early infantile, 5 (EIEE5) [MIM:613477]: A disorder characterized by seizures associated with hypsarrhythmia, profound mental retardation with lack of visual attention and speech development, as well as spastic quadriplegia. {ECO:0000269|PubMed:20493457, ECO:0000269|PubMed:27864847}. Note=The disease is caused by mutations affecting the gene represented in this …	actin filament capping [GO:0051693]; axon guidance [GO:0007411]; endoplasmic reticulum to Golgi vesicle-mediated transport [GO:0006888]; MAPK cascade [GO:0000165]; neutrophil degranulation [GO:0043312]	actin binding [GO:0003779]; cadherin binding [GO:0045296]; calcium ion binding [GO:0005509]; calmodulin binding [GO:0005516]; structural constituent of cytoskeleton [GO:0005200]	cytosol [GO:0005829]; extracellular exosome [GO:0070062]; extracellular region [GO:0005576]; extracellular vesicle [GO:1903561]; intracellular membrane-bounded organelle [GO:0043231]; membrane [GO:0016020]; microtubule cytoskeleton [GO:0015630]; specific granule lumen [GO:0035580]; spectrin [GO:0008091]; tertiary granule lumen [GO:1904724]	GO:0000165; GO:0003779; GO:0005200; GO:0005509; GO:0005516; GO:0005576; GO:0005829; GO:0006888; GO:0007411; GO:0008091; GO:0015630; GO:0016020; GO:0035580; GO:0043231; GO:0043312; GO:0045296; GO:0051693; GO:0070062; GO:1903561; GO:1904724	R-HSA-264870;R-HSA-373753;R-HSA-375165;R-HSA-445095;R-HSA-5673001;R-HSA-6798695;R-HSA-6807878;	hsa:6709;	23.192	23.181	23.2418	23.2522	23.2077	23.5724	23.6202	23.6669	23.6471	23.6827
YPEL5_P62699	-0.736123	-1.14038	-0.747408	-0.873365	-1.16266	0.935349	0.675669	0.920232	0.9219	1.20679	YPEL5	Protein yippee-like 5	P62699	1.0457	1.72447e-08	1.17297e-06	-0.691997	FUNCTION: Component of the CTLH E3 ubiquitin-protein ligase complex that selectively accepts ubiquitin from UBE2H and mediates ubiquitination and subsequent proteasomal degradation of the transcription factor HBP1 (PubMed:29911972). Required for normal cell proliferation (By similarity). {ECO:0000250|UniProtKB:Q65Z55, ECO:0000269|PubMed:29911972}.	SUBCELLULAR LOCATION: Nucleus {ECO:0000250|UniProtKB:Q65Z55}. Cytoplasm, cytoskeleton, microtubule organizing center, centrosome {ECO:0000250|UniProtKB:Q65Z55}. Cytoplasm, cytoskeleton, spindle pole {ECO:0000250|UniProtKB:Q65Z55}. Midbody {ECO:0000250|UniProtKB:Q65Z55}. Note=Deteted in nucleus and at the centrosome during interphase. During mitosis, detected on the mitotic spindle, at spindle pol…		cell population proliferation [GO:0008283]; neutrophil degranulation [GO:0043312]	metal ion binding [GO:0046872]	extracellular region [GO:0005576]; ficolin-1-rich granule lumen [GO:1904813]; microtubule organizing center [GO:0005815]; midbody [GO:0030496]; mitotic spindle pole [GO:0097431]; nucleus [GO:0005634]; tertiary granule lumen [GO:1904724]; ubiquitin ligase complex [GO:0000151]	GO:0000151; GO:0005576; GO:0005634; GO:0005815; GO:0008283; GO:0030496; GO:0043312; GO:0046872; GO:0097431; GO:1904724; GO:1904813	R-HSA-6798695;	hsa:51646;	15.2156	15.0655	15.2114	15.1646	15.0572	15.8361	15.7397	15.8305	15.8311	15.9369
ACTN4_O43707	-1.05377	-1.13052	-0.892478	-0.60999	-0.993065	0.938185	0.86318	1.16777	0.807796	0.902889	ACTN4	Alpha-actinin-4	O43707	1.01891	1.75452e-08	1.18215e-06	-0.444487	FUNCTION: F-actin cross-linking protein which is thought to anchor actin to a variety of intracellular structures. This is a bundling protein (Probable). Probably involved in vesicular trafficking via its association with the CART complex. The CART complex is necessary for efficient transferrin receptor recycling but not for EGFR degradation (PubMed:15772161). Involved in tight junction assembly …	SUBCELLULAR LOCATION: Nucleus {ECO:0000269|PubMed:22351778, ECO:0000269|PubMed:9508771}. Cytoplasm {ECO:0000269|PubMed:22351778, ECO:0000269|PubMed:9508771}. Cell junction {ECO:0000250|UniProtKB:P57780}. Cytoplasm, cytoskeleton, stress fiber {ECO:0000269|PubMed:9508771}. Note=Localized in cytoplasmic mRNP granules containing untranslated mRNAs. Nuclear translocation can be induced by the PI3 kina…	DISEASE: Focal segmental glomerulosclerosis 1 (FSGS1) [MIM:603278]: A renal pathology defined by the presence of segmental sclerosis in glomeruli and resulting in proteinuria, reduced glomerular filtration rate and progressive decline in renal function. Renal insufficiency often progresses to end-stage renal disease, a highly morbid state requiring either dialysis therapy or kidney transplantatio…	actin filament bundle assembly [GO:0051017]; bicellular tight junction assembly [GO:0070830]; negative regulation of cellular component movement [GO:0051271]; negative regulation of substrate adhesion-dependent cell spreading [GO:1900025]; peroxisome proliferator activated receptor signaling pathway [GO:0035357]; platelet degranulation [GO:0002576]; positive regulation of cell migration [GO:00303…	actin binding [GO:0003779]; actin filament binding [GO:0051015]; calcium ion binding [GO:0005509]; chromatin DNA binding [GO:0031490]; integrin binding [GO:0005178]; ion channel binding [GO:0044325]; nuclear hormone receptor binding [GO:0035257]; nuclear receptor transcription coactivator activity [GO:0030374]; nucleoside binding [GO:0001882]; protein homodimerization activity [GO:0042803]; prote…	brush border [GO:0005903]; cell [GO:0005623]; cell-cell junction [GO:0005911]; cortical cytoskeleton [GO:0030863]; cytoplasm [GO:0005737]; cytosol [GO:0005829]; extracellular exosome [GO:0070062]; extracellular region [GO:0005576]; extracellular space [GO:0005615]; focal adhesion [GO:0005925]; neuron projection [GO:0043005]; nuclear body [GO:0016604]; nucleus [GO:0005634]; perinuclear region of c…	GO:0000977; GO:0001666; GO:0001725; GO:0001882; GO:0002576; GO:0003713; GO:0003723; GO:0003779; GO:0005178; GO:0005509; GO:0005576; GO:0005615; GO:0005623; GO:0005634; GO:0005737; GO:0005829; GO:0005903; GO:0005911; GO:0005925; GO:0015031; GO:0016604; GO:0030018; GO:0030050; GO:0030335; GO:0030374; GO:0030863; GO:0031093; GO:0031143; GO:0031490; GO:0032417; GO:0032991; GO:0033209; GO:0035257; GO:…	R-HSA-114608;R-HSA-373753;	hsa:81;	23.4769	23.4587	23.5152	23.5823	23.4913	23.9499	23.9321	24.0044	23.9189	23.9415
PAFAH1B1_P43034	-0.915408	-0.892173	-0.990472	-0.741324	-1.14058	0.98725	0.85517	0.846007	0.741068	1.25046	PAFAH1B1	Platelet-activating factor acetylhydrolase IB subunit alpha	P43034	1.021	1.82023e-08	1.21316e-06	-0.439105	FUNCTION: Required for proper activation of Rho GTPases and actin polymerization at the leading edge of locomoting cerebellar neurons and postmigratory hippocampal neurons in response to calcium influx triggered via NMDA receptors. Non-catalytic subunit of an acetylhydrolase complex which inactivates platelet-activating factor (PAF) by removing the acetyl group at the SN-2 position (By similarity…	SUBCELLULAR LOCATION: Cytoplasm, cytoskeleton. Cytoplasm, cytoskeleton, microtubule organizing center, centrosome {ECO:0000269|PubMed:14654843}. Cytoplasm, cytoskeleton, spindle {ECO:0000255|HAMAP-Rule:MF_03141}. Nucleus membrane {ECO:0000255|HAMAP-Rule:MF_03141}. Note=Redistributes to axons during neuronal development. Also localizes to the microtubules of the manchette in elongating spermatids …	DISEASE: Lissencephaly 1 (LIS1) [MIM:607432]: A classical lissencephaly. It is characterized by agyria or pachygyria and disorganization of the clear neuronal lamination of normal six-layered cortex. The cortex is abnormally thick and poorly organized with 4 primitive layers. Associated with enlarged and dysmorphic ventricles and often hypoplasia of the corpus callosum. {ECO:0000269|PubMed:111632…	acrosome assembly [GO:0001675]; actin cytoskeleton organization [GO:0030036]; adult locomotory behavior [GO:0008344]; ameboidal-type cell migration [GO:0001667]; auditory receptor cell development [GO:0060117]; brain morphogenesis [GO:0048854]; cerebral cortex development [GO:0021987]; cerebral cortex neuron differentiation [GO:0021895]; chemical synaptic transmission [GO:0007268]; ciliary basal …	dynactin binding [GO:0034452]; dynein complex binding [GO:0070840]; dynein intermediate chain binding [GO:0045505]; heparin binding [GO:0008201]; microtubule binding [GO:0008017]; microtubule plus-end binding [GO:0051010]; phospholipase binding [GO:0043274]; phosphoprotein binding [GO:0051219]; protein homodimerization activity [GO:0042803]	astral microtubule [GO:0000235]; axon cytoplasm [GO:1904115]; cell [GO:0005623]; cell cortex [GO:0005938]; cell leading edge [GO:0031252]; central region of growth cone [GO:0090724]; centrosome [GO:0005813]; cytoplasmic microtubule [GO:0005881]; cytosol [GO:0005829]; extracellular exosome [GO:0070062]; kinesin complex [GO:0005871]; kinetochore [GO:0000776]; microtubule associated complex [GO:0005…	GO:0000086; GO:0000132; GO:0000226; GO:0000235; GO:0000776; GO:0001667; GO:0001675; GO:0001764; GO:0001961; GO:0005623; GO:0005635; GO:0005813; GO:0005829; GO:0005871; GO:0005875; GO:0005881; GO:0005938; GO:0007017; GO:0007097; GO:0007268; GO:0007405; GO:0007611; GO:0008017; GO:0008090; GO:0008201; GO:0008344; GO:0009306; GO:0010389; GO:0010977; GO:0016042; GO:0017145; GO:0019226; GO:0021540; GO:…	R-HSA-141444;R-HSA-2467813;R-HSA-2500257;R-HSA-2565942;R-HSA-380259;R-HSA-380270;R-HSA-380284;R-HSA-380320;R-HSA-5620912;R-HSA-5663220;R-HSA-6811436;R-HSA-68877;R-HSA-8854518;	hsa:5048;	20.9144	20.9198	20.8967	20.9552	20.8615	21.3607	21.3297	21.3275	21.3029	21.4224
DCPS_Q96C86	-0.671867	-0.957691	-1.14181	-0.654544	-1.2299	0.907936	0.870911	0.849923	0.897386	1.12965	DCPS	m7GpppX diphosphatase	Q96C86	1.04235	1.83451e-08	1.21316e-06	-0.777751	FUNCTION: Decapping scavenger enzyme that catalyzes the cleavage of a residual cap structure following the degradation of mRNAs by the 3'->5' exosome-mediated mRNA decay pathway. Hydrolyzes cap analog structures like 7-methylguanosine nucleoside triphosphate (m7GpppG) with up to 10 nucleotide substrates (small capped oligoribonucleotides) and specifically releases 5'-phosphorylated RNA fragments …	SUBCELLULAR LOCATION: Cytoplasm. Nucleus. Note=Predominantly localized in the nucleus. Nucleocytoplasmic shuttling protein that can transiently enter the cytoplasm in mammalian cells in a XPO1/CRM1-dependent manner.	DISEASE: Al-Raqad syndrome (ARS) [MIM:616459]: A syndrome characterized by delayed psychomotor development, moderate to severe intellectual disability, poor or absent speech, microcephaly, congenital hypotonia, and severe growth delay. {ECO:0000269|PubMed:25701870, ECO:0000269|PubMed:25712129}. Note=The disease is caused by mutations affecting the gene represented in this entry.	cellular response to menadione [GO:0036245]; deadenylation-dependent decapping of nuclear-transcribed mRNA [GO:0000290]; exonucleolytic catabolism of deadenylated mRNA [GO:0043928]; mRNA cis splicing, via spliceosome [GO:0045292]; negative regulation of programmed cell death [GO:0043069]; nuclear-transcribed mRNA catabolic process, deadenylation-dependent decay [GO:0000288]	exoribonuclease activity [GO:0004532]; m7G(5')pppN diphosphatase activity [GO:0050072]; RNA 7-methylguanosine cap binding [GO:0000340]	cytoplasm [GO:0005737]; cytosol [GO:0005829]; mitochondrion [GO:0005739]; nucleoplasm [GO:0005654]; nucleus [GO:0005634]; P-body [GO:0000932]	GO:0000288; GO:0000290; GO:0000340; GO:0000932; GO:0004532; GO:0005634; GO:0005654; GO:0005737; GO:0005739; GO:0005829; GO:0036245; GO:0043069; GO:0043928; GO:0045292; GO:0050072	R-HSA-429958;	hsa:28960;	18.4718	18.3524	18.2755	18.479	18.2387	19.1315	19.1161	19.1073	19.1271	19.2241
TUBA1B_P68363	0.942608	0.869377	0.954413	0.793385	1.08643	-0.54903	-0.916206	-0.968195	-0.873451	-1.33933	TUBA1B	Tubulin alpha-1B chain	P68363	1.08835	1.88635e-08	1.23599e-06	1.81065	FUNCTION: Tubulin is the major constituent of microtubules. It binds two moles of GTP, one at an exchangeable site on the beta chain and one at a non-exchangeable site on the alpha chain.	SUBCELLULAR LOCATION: Cytoplasm, cytoskeleton.		cell division [GO:0051301]; cellular response to interleukin-4 [GO:0071353]; cytoskeleton-dependent intracellular transport [GO:0030705]; microtubule-based process [GO:0007017]; microtubule cytoskeleton organization [GO:0000226]; mitotic cell cycle [GO:0000278]	double-stranded RNA binding [GO:0003725]; GTPase activity [GO:0003924]; GTP binding [GO:0005525]; structural constituent of cytoskeleton [GO:0005200]; structural molecule activity [GO:0005198]; ubiquitin protein ligase binding [GO:0031625]	cytoplasm [GO:0005737]; cytoplasmic microtubule [GO:0005881]; membrane raft [GO:0045121]; microtubule [GO:0005874]; microtubule cytoskeleton [GO:0015630]	GO:0000226; GO:0000278; GO:0003725; GO:0003924; GO:0005198; GO:0005200; GO:0005525; GO:0005737; GO:0005874; GO:0005881; GO:0007017; GO:0015630; GO:0030705; GO:0031625; GO:0045121; GO:0051301; GO:0071353	R-HSA-1445148;R-HSA-190840;R-HSA-190861;R-HSA-2132295;R-HSA-2467813;R-HSA-2500257;R-HSA-3371497;R-HSA-380320;R-HSA-389960;R-HSA-389977;R-HSA-437239;R-HSA-5610787;R-HSA-5617833;R-HSA-5620924;R-HSA-5626467;R-HSA-5663220;R-HSA-6807878;R-HSA-6811434;R-HSA-6811436;R-HSA-68877;R-HSA-8852276;R-HSA-8955332;R-HSA-9609736;R-HSA-9619483;R-HSA-983189;	hsa:10376;	22.318	22.2467	22.3295	22.1726	22.4581	20.8648	20.507	20.4564	20.5487	20.0948
EIF2S2_P20042	-0.901248	-0.999785	-0.910892	-0.820488	-1.08184	0.89544	0.885896	0.921687	0.83796	1.17327	EIF2S2	Eukaryotic translation initiation factor 2 subunit 2	P20042	1.01462	1.93373e-08	1.25552e-06	-0.311304	FUNCTION: eIF-2 functions in the early steps of protein synthesis by forming a ternary complex with GTP and initiator tRNA. This complex binds to a 40S ribosomal subunit, followed by mRNA binding to form a 43S preinitiation complex. Junction of the 60S ribosomal subunit to form the 80S initiation complex is preceded by hydrolysis of the GTP bound to eIF-2 and release of an eIF-2-GDP binary comple…			formation of cytoplasmic translation initiation complex [GO:0001732]; formation of translation preinitiation complex [GO:0001731]; in utero embryonic development [GO:0001701]; male germ cell proliferation [GO:0002176]; male gonad development [GO:0008584]; translational initiation [GO:0006413]; transmembrane transport [GO:0055085]	metal ion binding [GO:0046872]; mRNA binding [GO:0003729]; RNA binding [GO:0003723]; translation factor activity, RNA binding [GO:0008135]; translation initiation factor activity [GO:0003743]; translation initiation factor binding [GO:0031369]	cytoplasm [GO:0005737]; cytosol [GO:0005829]; eukaryotic translation initiation factor 2 complex [GO:0005850]	GO:0001701; GO:0001731; GO:0001732; GO:0002176; GO:0003723; GO:0003729; GO:0003743; GO:0005737; GO:0005829; GO:0005850; GO:0006413; GO:0008135; GO:0008584; GO:0031369; GO:0046872; GO:0055085	R-HSA-156827;R-HSA-381042;R-HSA-382556;R-HSA-72649;R-HSA-72695;R-HSA-72702;R-HSA-72706;R-HSA-72731;	hsa:8894;	21.3007	21.2844	21.2991	21.314	21.2709	21.5973	21.5957	21.6016	21.5878	21.6431
ADD3_Q9UEY8	-0.851075	-1.02954	-1.02108	-0.874373	-0.924807	1.153	0.962988	0.6652	0.884153	1.03553	ADD3	Gamma-adducin	Q9UEY8	1.01796	1.99884e-08	1.2861e-06	-0.343087	FUNCTION: Membrane-cytoskeleton-associated protein that promotes the assembly of the spectrin-actin network. Plays a role in actin filament capping (PubMed:23836506). Binds to calmodulin. {ECO:0000269|PubMed:23836506}.	SUBCELLULAR LOCATION: Cytoplasm, cytoskeleton. Cell membrane; Peripheral membrane protein; Cytoplasmic side.	DISEASE: Cerebral palsy, spastic quadriplegic 3 (CPSQ3) [MIM:617008]: A form of cerebral palsy, a group of non-progressive disorders of movement and/or posture resulting from defects in the developing central nervous system. CPSQ3 is an autosomal recessive neurodevelopmental disorder characterized by variable spasticity and cognitive impairment. {ECO:0000269|PubMed:23836506}. Note=The disease is …	actin filament bundle assembly [GO:0051017]; barbed-end actin filament capping [GO:0051016]; transmembrane transport [GO:0055085]	actin filament binding [GO:0051015]; calmodulin binding [GO:0005516]; spectrin binding [GO:0030507]; structural constituent of cytoskeleton [GO:0005200]	brush border [GO:0005903]; cell-cell junction [GO:0005911]; cell cortex [GO:0005938]; condensed nuclear chromosome [GO:0000794]; cytoskeleton [GO:0005856]; cytosol [GO:0005829]; membrane [GO:0016020]; plasma membrane [GO:0005886]; plasma membrane raft [GO:0044853]; postsynaptic density [GO:0014069]	GO:0000794; GO:0005200; GO:0005516; GO:0005829; GO:0005856; GO:0005886; GO:0005903; GO:0005911; GO:0005938; GO:0014069; GO:0016020; GO:0030507; GO:0044853; GO:0051015; GO:0051016; GO:0051017; GO:0055085	R-HSA-5223345;	hsa:120;	19.1152	19.0827	19.0842	19.111	19.1018	19.4809	19.4462	19.3919	19.4318	19.4595
SERPINB9_P50453	-0.927025	-0.59037	-0.819298	-1.15286	-1.16727	0.929888	0.927244	0.815779	0.803127	1.18078	SERPINB9	Serpin B9	P50453	1.03742	2.0369e-08	1.29377e-06	-0.688581	FUNCTION: Granzyme B inhibitor.	SUBCELLULAR LOCATION: Cytoplasm.		cellular response to estrogen stimulus [GO:0071391]; immune response [GO:0006955]; mast cell mediated immunity [GO:0002448]; negative regulation by symbiont of host apoptotic process [GO:0033668]; negative regulation of apoptotic process [GO:0043066]; negative regulation of endopeptidase activity [GO:0010951]; positive regulation of gene expression [GO:0010628]; protection from natural killer cel…	cysteine-type endopeptidase inhibitor activity involved in apoptotic process [GO:0043027]; protease binding [GO:0002020]; serine-type endopeptidase inhibitor activity [GO:0004867]	collagen-containing extracellular matrix [GO:0062023]; cytoplasm [GO:0005737]; cytosol [GO:0005829]; extracellular exosome [GO:0070062]; extracellular space [GO:0005615]; Golgi apparatus [GO:0005794]; membrane [GO:0016020]; nucleoplasm [GO:0005654]; nucleus [GO:0005634]	GO:0002020; GO:0002448; GO:0004867; GO:0005615; GO:0005634; GO:0005654; GO:0005737; GO:0005794; GO:0005829; GO:0006955; GO:0009617; GO:0010628; GO:0010951; GO:0016020; GO:0033668; GO:0042270; GO:0043027; GO:0043066; GO:0062023; GO:0070062; GO:0071391		hsa:5272;	18.4043	18.5288	18.4441	18.3208	18.3155	19.0907	19.0898	19.0486	19.0439	19.1835
CNPY4_A0A0J9YYJ0	-0.982375	-1.02064	-1.08805	-0.499754	-1.0606	0.924497	0.731154	1.04238	0.816978	1.13642	CNPY4	Protein canopy homolog 4	A0A0J9YYJ0	1.05479	2.06432e-08	1.29377e-06	-0.861593										15.7023	15.6846	15.6534	15.9258	15.6661	16.5854	16.4958	16.64	16.5356	16.6835
COPB1_P53618	-1.01434	-0.795337	-0.953122	-0.956561	-0.998507	0.910803	0.935759	1.14617	0.787913	0.93722	COPB1	Coatomer subunit beta	P53618	1.01362	2.09189e-08	1.29377e-06	-0.300619	FUNCTION: The coatomer is a cytosolic protein complex that binds to dilysine motifs and reversibly associates with Golgi non-clathrin-coated vesicles, which further mediate biosynthetic protein transport from the ER, via the Golgi up to the trans Golgi network. Coatomer complex is required for budding from Golgi membranes, and is essential for the retrograde Golgi-to-ER transport of dilysine-tagg…	SUBCELLULAR LOCATION: Cytoplasm. Golgi apparatus membrane {ECO:0000269|PubMed:11056392, ECO:0000269|PubMed:17451557, ECO:0000269|PubMed:7573041}; Peripheral membrane protein {ECO:0000269|PubMed:17451557, ECO:0000269|PubMed:18385291, ECO:0000269|PubMed:20056612}; Cytoplasmic side {ECO:0000305}. Cytoplasmic vesicle, COPI-coated vesicle membrane; Peripheral membrane protein {ECO:0000305}; Cytoplasmi…		endoplasmic reticulum to Golgi vesicle-mediated transport [GO:0006888]; intracellular protein transport [GO:0006886]; intra-Golgi vesicle-mediated transport [GO:0006891]; neutrophil degranulation [GO:0043312]; retrograde vesicle-mediated transport, Golgi to endoplasmic reticulum [GO:0006890]; viral process [GO:0016032]	structural molecule activity [GO:0005198]	COPI vesicle coat [GO:0030126]; cytosol [GO:0005829]; endoplasmic reticulum-Golgi intermediate compartment [GO:0005793]; endoplasmic reticulum membrane [GO:0005789]; ficolin-1-rich granule membrane [GO:0101003]; Golgi apparatus [GO:0005794]; Golgi-associated vesicle [GO:0005798]; Golgi membrane [GO:0000139]; intracellular membrane-bounded organelle [GO:0043231]; membrane [GO:0016020]; plasma memb…	GO:0000139; GO:0005198; GO:0005789; GO:0005793; GO:0005794; GO:0005798; GO:0005829; GO:0005886; GO:0006886; GO:0006888; GO:0006890; GO:0006891; GO:0016020; GO:0016032; GO:0030126; GO:0030133; GO:0030667; GO:0043231; GO:0043312; GO:0070821; GO:0101003	R-HSA-6798695;R-HSA-6807878;R-HSA-6811434;	hsa:1315;	22.0658	22.1006	22.0755	22.075	22.0683	22.3724	22.3764	22.4099	22.3529	22.3766
_M0QYT0	-0.720873	-0.81656	-0.883491	-0.971492	-1.26908	1.02631	0.960537	1.17191	0.762493	0.74024			M0QYT0	1.03352	2.09687e-08	1.29377e-06	-0.588625					delta3,5-delta2,4-dienoyl-CoA isomerase activity [GO:0051750]; RNA binding [GO:0003723]	mitochondrion [GO:0005739]	GO:0003723; GO:0005739; GO:0051750			17.6284	17.5982	17.5771	17.5493	17.4554	18.18	18.1592	18.226	18.0967	18.0897
ANAPC16_Q96DE5	-0.863245	-0.672236	-1.21636	-0.826176	-1.09749	0.829699	0.990534	0.86196	0.860353	1.13296	ANAPC16	Anaphase-promoting complex subunit 16	Q96DE5	1.02554	2.10134e-08	1.29377e-06	-0.449235	FUNCTION: Component of the anaphase promoting complex/cyclosome (APC/C), a cell cycle-regulated E3 ubiquitin ligase that controls progression through mitosis and the G1 phase of the cell cycle. The APC/C complex acts by mediating ubiquitination and subsequent degradation of target proteins: it mainly mediates the formation of 'Lys-11'-linked polyubiquitin chains and, to a lower extent, the format…	SUBCELLULAR LOCATION: Cytoplasm {ECO:0000269|PubMed:20360068}. Nucleus {ECO:0000269|PubMed:20360068}. Chromosome, centromere, kinetochore {ECO:0000269|PubMed:20813266}.		anaphase-promoting complex-dependent catabolic process [GO:0031145]; cell cycle [GO:0007049]; cell division [GO:0051301]; protein ubiquitination [GO:0016567]; regulation of mitotic cell cycle phase transition [GO:1901990]; ubiquitin-dependent protein catabolic process [GO:0006511]		anaphase-promoting complex [GO:0005680]; condensed chromosome kinetochore [GO:0000777]; cytosol [GO:0005829]; kinetochore [GO:0000776]; nucleoplasm [GO:0005654]	GO:0000776; GO:0000777; GO:0005654; GO:0005680; GO:0005829; GO:0006511; GO:0007049; GO:0016567; GO:0031145; GO:0051301; GO:1901990	R-HSA-141430;R-HSA-174048;R-HSA-174084;R-HSA-174154;R-HSA-174178;R-HSA-174184;R-HSA-176407;R-HSA-176408;R-HSA-176409;R-HSA-176412;R-HSA-179409;R-HSA-2467813;R-HSA-2559582;R-HSA-69017;	hsa:119504;	17.6043	17.6502	17.5195	17.6132	17.5481	18.011	18.0496	18.0187	18.0184	18.0838
GSTM1_P09488	-0.959393	-0.550389	-0.913594	-1.19826	-1.03453	0.887765	0.8917	0.883517	0.789643	1.20354	GSTM1	Glutathione S-transferase Mu 1;Glutathione S-transferase Mu 2	P09488	1.03683	2.15366e-08	1.29445e-06	-0.677744	FUNCTION: Conjugation of reduced glutathione to a wide number of exogenous and endogenous hydrophobic electrophiles. {ECO:0000269|PubMed:16548513}.	SUBCELLULAR LOCATION: Cytoplasm.		cellular detoxification of nitrogen compound [GO:0070458]; glutathione derivative biosynthetic process [GO:1901687]; glutathione metabolic process [GO:0006749]; nitrobenzene metabolic process [GO:0018916]; xenobiotic catabolic process [GO:0042178]	enzyme binding [GO:0019899]; glutathione binding [GO:0043295]; glutathione transferase activity [GO:0004364]; protein homodimerization activity [GO:0042803]	cytoplasm [GO:0005737]; cytosol [GO:0005829]; intercellular bridge [GO:0045171]	GO:0004364; GO:0005737; GO:0005829; GO:0006749; GO:0018916; GO:0019899; GO:0042178; GO:0042803; GO:0043295; GO:0045171; GO:0070458; GO:1901687	R-HSA-156590;	hsa:2944;	18.3892	18.5381	18.4059	18.3023	18.3619	19.0614	19.0628	19.0599	19.0257	19.1763
SC5D_O75845	-0.823238	-0.631411	-1.088	-1.16044	-0.949004	0.690019	1.03343	0.939354	0.785463	1.20383	SC5D	Lathosterol oxidase	O75845	1.05063	2.1565e-08	1.29445e-06	-0.796698	FUNCTION: Catalyzes a dehydrogenation to introduce C5-6 double bond into lathosterol.	SUBCELLULAR LOCATION: Endoplasmic reticulum membrane {ECO:0000305}; Multi-pass membrane protein {ECO:0000305}.	DISEASE: Lathosterolosis (LATHST) [MIM:607330]: Autosomal recessive disorder characterized by a complex phenotype, including multiple congenital anomalies, mental retardation, and liver disease. {ECO:0000269|PubMed:12189593, ECO:0000269|PubMed:12812989}. Note=The disease is caused by mutations affecting the gene represented in this entry.	cholesterol biosynthetic process via desmosterol [GO:0033489]; cholesterol biosynthetic process via lathosterol [GO:0033490]; lipid metabolic process [GO:0006629]; regulation of cholesterol biosynthetic process [GO:0045540]; sterol biosynthetic process [GO:0016126]	C-5 sterol desaturase activity [GO:0000248]; iron ion binding [GO:0005506]	endoplasmic reticulum membrane [GO:0005789]; integral component of membrane [GO:0016021]	GO:0000248; GO:0005506; GO:0005789; GO:0006629; GO:0016021; GO:0016126; GO:0033489; GO:0033490; GO:0045540	R-HSA-2426168;R-HSA-6807047;R-HSA-6807062;	hsa:6309;	15.7806	15.8628	15.6673	15.6363	15.7268	16.4285	16.5756	16.5353	16.4694	16.6485
TRAPPC5_Q8IUR0	-1.11484	-0.923355	-0.981654	-0.511201	-1.1175	0.9176	0.770882	1.05971	0.768733	1.13163	TRAPPC5	Trafficking protein particle complex subunit 5	Q8IUR0	1.06212	2.18351e-08	1.29445e-06	-0.959619	FUNCTION: May play a role in vesicular transport from endoplasmic reticulum to Golgi.	SUBCELLULAR LOCATION: Golgi apparatus, cis-Golgi network {ECO:0000250}. Endoplasmic reticulum {ECO:0000250}.		COPII vesicle coating [GO:0048208]; endoplasmic reticulum to Golgi vesicle-mediated transport [GO:0006888]		cytosol [GO:0005829]; endoplasmic reticulum [GO:0005783]; Golgi membrane [GO:0000139]; TRAPP complex [GO:0030008]; TRAPPIII protein complex [GO:1990072]; TRAPPII protein complex [GO:1990071]; TRAPPI protein complex [GO:1990070]	GO:0000139; GO:0005783; GO:0005829; GO:0006888; GO:0030008; GO:0048208; GO:1990070; GO:1990071; GO:1990072	R-HSA-204005;R-HSA-8876198;	hsa:126003;	15.3523	15.4511	15.421	15.6638	15.3509	16.4012	16.3255	16.4745	16.3243	16.5116
TAX1BP1_B8ZZD4	-0.569402	-0.993514	-0.992732	-0.852658	-1.25507	0.909762	0.911137	0.795863	0.935435	1.11117	TAX1BP1	Tax1-binding protein 1	B8ZZD4	1.02893	2.19424e-08	1.29445e-06	-0.550529										19.1384	19.0132	19.0135	19.0548	18.9361	19.575	19.5754	19.5414	19.5825	19.6344
HSD17B12_Q53GQ0	-1.06792	-0.711217	-1.10188	-0.958211	-0.862847	0.938909	0.845612	1.09894	0.81198	1.00663	HSD17B12	Very-long-chain 3-oxoacyl-CoA reductase	Q53GQ0	1.01716	2.24535e-08	1.29445e-06	-0.333072	FUNCTION: Catalyzes the second of the four reactions of the long-chain fatty acids elongation cycle. This endoplasmic reticulum-bound enzymatic process, allows the addition of two carbons to the chain of long- and very long-chain fatty acids/VLCFAs per cycle. This enzyme has a 3-ketoacyl-CoA reductase activity, reducing 3-ketoacyl-CoA to 3-hydroxyacyl-CoA, within each cycle of fatty acid elongati…	SUBCELLULAR LOCATION: Endoplasmic reticulum membrane {ECO:0000269|PubMed:12482854}; Multi-pass membrane protein {ECO:0000269|PubMed:12482854}.		estrogen biosynthetic process [GO:0006703]; extracellular matrix organization [GO:0030198]; fatty acid biosynthetic process [GO:0006633]; long-chain fatty-acyl-CoA biosynthetic process [GO:0035338]; positive regulation of cell-substrate adhesion [GO:0010811]	3-oxo-arachidoyl-CoA reductase activity [GO:0102339]; 3-oxo-behenoyl-CoA reductase activity [GO:0102340]; 3-oxo-cerotoyl-CoA reductase activity [GO:0102342]; 3-oxo-lignoceroyl-CoA reductase activity [GO:0102341]; collagen binding [GO:0005518]; estradiol 17-beta-dehydrogenase activity [GO:0004303]; fibronectin binding [GO:0001968]; heparin binding [GO:0008201]	endoplasmic reticulum membrane [GO:0005789]; extracellular matrix [GO:0031012]; integral component of membrane [GO:0016021]	GO:0001968; GO:0004303; GO:0005518; GO:0005789; GO:0006633; GO:0006703; GO:0008201; GO:0010811; GO:0016021; GO:0030198; GO:0031012; GO:0035338; GO:0102339; GO:0102340; GO:0102341; GO:0102342	R-HSA-193048;R-HSA-75876;	hsa:51144;	19.3847	19.4479	19.3787	19.4041	19.421	19.7401	19.7236	19.7684	19.7176	19.7521
OPLAH_O14841	-0.763771	-1.11584	-0.894188	-0.837699	-1.1017	0.891244	0.945662	1.03373	0.951211	0.89135	OPLAH	5-oxoprolinase	O14841	1.01806	2.25347e-08	1.29445e-06	-0.306834	FUNCTION: Catalyzes the cleavage of 5-oxo-L-proline to form L-glutamate coupled to the hydrolysis of ATP to ADP and inorganic phosphate.		DISEASE: 5-oxoprolinase deficiency (OPLAHD) [MIM:260005]: A disorder characterized by calcium oxalate/carbonate urolithiasis, and excessive urinary 5-oxo-L-proline. Affected individuals have recurrent episodes of vomiting, diarrhea, and abdominal pain. {ECO:0000269|PubMed:21651516}. Note=The disease is caused by mutations affecting the gene represented in this entry.	glutathione biosynthetic process [GO:0006750]; glutathione metabolic process [GO:0006749]	5-oxoprolinase (ATP-hydrolyzing) activity [GO:0017168]; ATP binding [GO:0005524]	cytosol [GO:0005829]	GO:0005524; GO:0005829; GO:0006749; GO:0006750; GO:0017168	R-HSA-174403;R-HSA-5578998;	hsa:26873;	17.0228	16.9655	17.0016	17.0108	16.9678	17.2922	17.301	17.3153	17.3019	17.2922
TGOLN2_O43493	-0.670502	-1.0866	-1.05487	-0.627931	-1.20693	0.800153	0.857829	0.901574	0.904582	1.1827	TGOLN2	Trans-Golgi network integral membrane protein 2	O43493	1.05307	2.26541e-08	1.29445e-06	-1.03115	FUNCTION: May be involved in regulating membrane traffic to and from trans-Golgi network.	SUBCELLULAR LOCATION: Cell membrane; Single-pass type I membrane protein. Golgi apparatus, trans-Golgi network membrane; Single-pass type I membrane protein. Note=Primarily in trans-Golgi network. Cycles between the trans-Golgi network and the cell surface returning via endosomes.		cellular protein metabolic process [GO:0044267]; membrane organization [GO:0061024]; post-translational protein modification [GO:0043687]		clathrin-coated vesicle membrane [GO:0030665]; endoplasmic reticulum lumen [GO:0005788]; endosome [GO:0005768]; Golgi apparatus [GO:0005794]; integral component of membrane [GO:0016021]; nucleoplasm [GO:0005654]; plasma membrane [GO:0005886]; trans-Golgi network [GO:0005802]; trans-Golgi network transport vesicle [GO:0030140]; transport vesicle [GO:0030133]	GO:0005654; GO:0005768; GO:0005788; GO:0005794; GO:0005802; GO:0005886; GO:0016021; GO:0030133; GO:0030140; GO:0030665; GO:0043687; GO:0044267; GO:0061024	R-HSA-381426;R-HSA-432722;R-HSA-6811440;R-HSA-8856825;R-HSA-8856828;R-HSA-8957275;	hsa:10618;	19.5752	19.3444	19.362	19.5989	19.2776	20.3911	20.4231	20.4474	20.449	20.6033
PYGB_P11216	-1.04586	-0.975659	-0.884773	-0.944821	-0.860328	0.909266	0.920572	0.90441	0.774395	1.2028	PYGB	Glycogen phosphorylase, brain form	P11216	1.01408	2.2701e-08	1.29445e-06	-0.310198	FUNCTION: Glycogen phosphorylase that regulates glycogen mobilization (PubMed:27402852). Phosphorylase is an important allosteric enzyme in carbohydrate metabolism (PubMed:3346228). Enzymes from different sources differ in their regulatory mechanisms and in their natural substrates (PubMed:3346228). However, all known phosphorylases share catalytic and structural properties (PubMed:3346228). {ECO…			glycogen catabolic process [GO:0005980]; neutrophil degranulation [GO:0043312]	glycogen phosphorylase activity [GO:0008184]; linear malto-oligosaccharide phosphorylase activity [GO:0102250]; pyridoxal phosphate binding [GO:0030170]; SHG alpha-glucan phosphorylase activity [GO:0102499]	azurophil granule lumen [GO:0035578]; cytoplasm [GO:0005737]; extracellular exosome [GO:0070062]; extracellular region [GO:0005576]; membrane [GO:0016020]	GO:0005576; GO:0005737; GO:0005980; GO:0008184; GO:0016020; GO:0030170; GO:0035578; GO:0043312; GO:0070062; GO:0102250; GO:0102499	R-HSA-6798695;R-HSA-70221;	hsa:5834;	22.0206	22.0322	22.0471	22.0372	22.0511	22.3424	22.3443	22.3416	22.3202	22.3907
SLC6A6_C9JPV1	-1.26606	-0.968309	-0.624628	-0.748152	-1.03678	0.813218	0.770372	1.12076	0.82357	1.11601	SLC6A6	Transporter;Sodium- and chloride-dependent taurine transporter	C9JPV1	1.0945	2.27685e-08	1.29445e-06	-1.38382					neurotransmitter:sodium symporter activity [GO:0005328]	integral component of membrane [GO:0016021]	GO:0005328; GO:0016021			14.3919	14.6138	14.8698	14.7778	14.5628	15.9409	15.909	16.17	15.9486	16.1665
NPC2_J3KMY5	-0.795507	-1.03095	-1.1845	-0.666557	-0.977555	0.759306	0.852208	0.95329	0.815802	1.27446	NPC2	Epididymal secretory protein E1	J3KMY5	1.03423	2.29497e-08	1.29445e-06	-0.673368				intracellular cholesterol transport [GO:0032367]			GO:0032367			19.721	19.6358	19.5803	19.7676	19.6551	20.2832	20.3168	20.3534	20.3037	20.4695
GFPT1_Q06210	-1.0412	-0.804222	-0.887379	-0.977869	-0.95271	0.793747	0.766781	0.94664	0.778896	1.37732	GFPT1	Glutamine--fructose-6-phosphate aminotransferase [isomerizing] 1	Q06210	1.02597	2.30182e-08	1.29445e-06	-0.538749	FUNCTION: Controls the flux of glucose into the hexosamine pathway. Most likely involved in regulating the availability of precursors for N- and O-linked glycosylation of proteins. Regulates the circadian expression of clock genes ARNTL/BMAL1 and CRY1.		DISEASE: Myasthenic syndrome, congenital, 12 (CMS12) [MIM:610542]: A form of congenital myasthenic syndrome, a group of disorders characterized by failure of neuromuscular transmission, including pre-synaptic, synaptic, and post-synaptic disorders that are not of autoimmune origin. Clinical features are easy fatigability and muscle weakness. CMS12 is characterized by onset of proximal muscle weak…	circadian regulation of gene expression [GO:0032922]; energy reserve metabolic process [GO:0006112]; fructose 6-phosphate metabolic process [GO:0006002]; glutamine metabolic process [GO:0006541]; IRE1-mediated unfolded protein response [GO:0036498]; protein N-linked glycosylation [GO:0006487]; UDP-N-acetylglucosamine biosynthetic process [GO:0006048]; UDP-N-acetylglucosamine metabolic process [GO…	carbohydrate derivative binding [GO:0097367]; glutamine-fructose-6-phosphate transaminase (isomerizing) activity [GO:0004360]	cytosol [GO:0005829]; extracellular exosome [GO:0070062]	GO:0004360; GO:0005829; GO:0006002; GO:0006047; GO:0006048; GO:0006112; GO:0006487; GO:0006541; GO:0032922; GO:0036498; GO:0070062; GO:0097367	R-HSA-381038;R-HSA-4085023;R-HSA-446210;	hsa:2673;	20.7104	20.7788	20.7548	20.7287	20.7359	21.2404	21.2326	21.2845	21.2361	21.4089
MED31_Q9Y3C7	-0.9279	-0.718191	-1.13922	-0.976468	-0.895511	0.860011	0.871323	0.93664	0.666666	1.32265	MED31	Mediator of RNA polymerase II transcription subunit 31	Q9Y3C7	1.03794	2.33529e-08	1.29697e-06	-0.621696	FUNCTION: Component of the Mediator complex, a coactivator involved in the regulated transcription of nearly all RNA polymerase II-dependent genes. Mediator functions as a bridge to convey information from gene-specific regulatory proteins to the basal RNA polymerase II transcription machinery. Mediator is recruited to promoters by direct interactions with regulatory proteins and serves as a scaf…	SUBCELLULAR LOCATION: Nucleus {ECO:0000305}.		limb development [GO:0060173]; negative regulation of fibroblast proliferation [GO:0048147]; regulation of transcription by RNA polymerase II [GO:0006357]; transcription initiation from RNA polymerase II promoter [GO:0006367]	transcription coactivator activity [GO:0003713]; ubiquitin protein ligase activity [GO:0061630]	core mediator complex [GO:0070847]; mediator complex [GO:0016592]; nucleoplasm [GO:0005654]; ubiquitin ligase complex [GO:0000151]	GO:0000151; GO:0003713; GO:0005654; GO:0006357; GO:0006367; GO:0016592; GO:0048147; GO:0060173; GO:0061630; GO:0070847	R-HSA-1989781;R-HSA-212436;R-HSA-381340;	hsa:51003;	16.3884	16.4584	16.3179	16.3722	16.3992	16.9851	16.9889	17.0107	16.9206	17.1395
RPS23_P62266	0.974764	0.969844	0.853728	0.836915	1.05023	-0.590703	-1.09039	-0.887871	-1.13223	-0.984297	RPS23	40S ribosomal protein S23	P62266	1.01846	2.36107e-08	1.29697e-06	0.384514	FUNCTION: Component of the ribosome, a large ribonucleoprotein complex responsible for the synthesis of proteins in the cell (PubMed:28257692, PubMed:23636399, PubMed:25957688, PubMed:25901680). The small ribosomal subunit (SSU) binds messenger RNAs (mRNAs) and translates the encoded message by selecting cognate aminoacyl-transfer RNA (tRNA) molecules. The large subunit (LSU) contains the ribosom…	SUBCELLULAR LOCATION: Cytoplasm, cytosol {ECO:0000269|PubMed:25957688}. Cytoplasm {ECO:0000305|PubMed:23636399, ECO:0000305|PubMed:25901680}. Rough endoplasmic reticulum {ECO:0000250|UniProtKB:Q6SA96}. Note=Detected on cytosolic polysomes (PubMed:25957688). Detected in ribosomes that are associated with the rough endoplasmic reticulum (By similarity). {ECO:0000250|UniProtKB:Q6SA96, ECO:0000269|Pu…	DISEASE: Brachycephaly, trichomegaly, and developmental delay (BTDD) [MIM:617412]: An autosomal dominant developmental disorder characterized by brachycephaly, ciliary trichomegaly, dysmorphic features of the face and hands, hearing loss, and developmental delay with short stature. Intellectual disability and autism spectrum disorder may be present in some patients. {ECO:0000269|PubMed:28257692}.…	cytoplasmic translation [GO:0002181]; maintenance of translational fidelity [GO:1990145]; nuclear-transcribed mRNA catabolic process, nonsense-mediated decay [GO:0000184]; SRP-dependent cotranslational protein targeting to membrane [GO:0006614]; stress granule assembly [GO:0034063]; translation [GO:0006412]; translational initiation [GO:0006413]; viral transcription [GO:0019083]	RNA binding [GO:0003723]; structural constituent of ribosome [GO:0003735]	cytosol [GO:0005829]; cytosolic small ribosomal subunit [GO:0022627]; endoplasmic reticulum [GO:0005783]; membrane [GO:0016020]; nucleoplasm [GO:0005654]; polysomal ribosome [GO:0042788]; ribosome [GO:0005840]; rough endoplasmic reticulum [GO:0005791]; synapse [GO:0045202]	GO:0000184; GO:0002181; GO:0003723; GO:0003735; GO:0005654; GO:0005783; GO:0005791; GO:0005829; GO:0005840; GO:0006412; GO:0006413; GO:0006614; GO:0016020; GO:0019083; GO:0022627; GO:0034063; GO:0042788; GO:0045202; GO:1990145	R-HSA-156827;R-HSA-156902;R-HSA-1799339;R-HSA-192823;R-HSA-2408557;R-HSA-6791226;R-HSA-72649;R-HSA-72689;R-HSA-72695;R-HSA-72702;R-HSA-72706;R-HSA-72764;R-HSA-9010553;R-HSA-975956;R-HSA-975957;	hsa:6228;	21.2248	21.2238	21.2	21.1965	21.2403	20.9036	20.8011	20.8427	20.7925	20.8229
HSPB1_P04792	0.843181	0.913849	0.942407	0.933323	1.05869	-0.672829	-0.780724	-0.975678	-1.11022	-1.152	HSPB1	Heat shock protein beta-1	P04792	1.01756	2.37625e-08	1.29697e-06	0.361544	FUNCTION: Small heat shock protein which functions as a molecular chaperone probably maintaining denatured proteins in a folding-competent state (PubMed:10383393, PubMed:20178975). Plays a role in stress resistance and actin organization (PubMed:19166925). Through its molecular chaperone activity may regulate numerous biological processes including the phosphorylation and the axonal transport of …	SUBCELLULAR LOCATION: Cytoplasm {ECO:0000269|PubMed:10777697, ECO:0000269|PubMed:28144995}. Nucleus {ECO:0000269|PubMed:19464326}. Cytoplasm, cytoskeleton, spindle {ECO:0000269|PubMed:10777697}. Note=Cytoplasmic in interphase cells. Colocalizes with mitotic spindles in mitotic cells. Translocates to the nucleus during heat shock and resides in sub-nuclear structures known as SC35 speckles or nucl…	DISEASE: Charcot-Marie-Tooth disease 2F (CMT2F) [MIM:606595]: A dominant axonal form of Charcot-Marie-Tooth disease, a disorder of the peripheral nervous system, characterized by progressive weakness and atrophy, initially of the peroneal muscles and later of the distal muscles of the arms. Charcot-Marie-Tooth disease is classified in two main groups on the basis of electrophysiologic properties …	anterograde axonal protein transport [GO:0099641]; cellular response to vascular endothelial growth factor stimulus [GO:0035924]; chaperone-mediated protein folding [GO:0061077]; intracellular signal transduction [GO:0035556]; negative regulation of apoptotic process [GO:0043066]; negative regulation of oxidative stress-induced intrinsic apoptotic signaling pathway [GO:1902176]; negative regulati…	identical protein binding [GO:0042802]; protein folding chaperone [GO:0044183]; protein homodimerization activity [GO:0042803]; protein kinase binding [GO:0019901]; protein kinase C binding [GO:0005080]; protein kinase C inhibitor activity [GO:0008426]; RNA binding [GO:0003723]; ubiquitin binding [GO:0043130]	axon cytoplasm [GO:1904115]; cytoplasm [GO:0005737]; cytoskeleton [GO:0005856]; cytosol [GO:0005829]; extracellular exosome [GO:0070062]; extracellular space [GO:0005615]; focal adhesion [GO:0005925]; nucleus [GO:0005634]; plasma membrane [GO:0005886]; proteasome complex [GO:0000502]; spindle [GO:0005819]; Z disc [GO:0030018]	GO:0000502; GO:0001895; GO:0001932; GO:0003723; GO:0005080; GO:0005615; GO:0005634; GO:0005737; GO:0005819; GO:0005829; GO:0005856; GO:0005886; GO:0005925; GO:0006446; GO:0006469; GO:0006986; GO:0008426; GO:0009615; GO:0010506; GO:0019901; GO:0030018; GO:0032731; GO:0035556; GO:0035924; GO:0038033; GO:0042535; GO:0042802; GO:0042803; GO:0043066; GO:0043122; GO:0043130; GO:0043488; GO:0043536; GO:…	R-HSA-4420097;R-HSA-450408;R-HSA-5687128;R-HSA-9009391;	hsa:3315;	20.9349	20.9485	20.954	20.9522	20.9764	20.6428	20.622	20.5844	20.5585	20.5505
HNRNPD_D6RBQ9	-1.03208	-1.09512	-0.764975	-0.508489	-1.24168	0.99131	0.836117	1.07134	0.857162	0.886408	HNRNPD		D6RBQ9	1.10643	2.37893e-08	1.29697e-06	-1.54847					RNA binding [GO:0003723]		GO:0003723			14.4634	14.4108	14.6861	14.9	14.2886	16.1507	16.0212	16.2174	16.0388	16.0632
CALR_P27797	-1.04468	-1.03139	-0.952685	-0.525675	-1.10514	0.938663	0.93573	1.17947	0.766292	0.839407	CALR	Calreticulin	P27797	1.02586	2.40978e-08	1.30383e-06	-0.575498	FUNCTION: Calcium-binding chaperone that promotes folding, oligomeric assembly and quality control in the endoplasmic reticulum (ER) via the calreticulin/calnexin cycle. This lectin interacts transiently with almost all of the monoglucosylated glycoproteins that are synthesized in the ER. Interacts with the DNA-binding domain of NR3C1 and mediates its nuclear export. Involved in maternal gene exp…	SUBCELLULAR LOCATION: Endoplasmic reticulum lumen {ECO:0000269|PubMed:10358038, ECO:0000269|PubMed:11149926}. Cytoplasm, cytosol {ECO:0000269|PubMed:11149926}. Secreted, extracellular space, extracellular matrix {ECO:0000305}. Cell surface {ECO:0000269|PubMed:10358038}. Sarcoplasmic reticulum lumen {ECO:0000250|UniProtKB:P28491}. Note=Also found in cell surface (T cells), cytosol and extracellula…	DISEASE: Note=CARL somatic mutations are frequently found in myeloproliferative neoplasms lacking JAK2 or MPL mutations. Myeloproliferative neoplasms are chronic myeloid cancers characterized by overproduction of mature blood cells, and may evolve into acute myeloid leukemia. In addition to chronic myeloid leukemia with the BCR-ABL fusion gene, the three most common myeloproliferative neoplasms a…	antigen processing and presentation of exogenous peptide antigen via MHC class I, TAP-dependent [GO:0002479]; antigen processing and presentation of peptide antigen via MHC class I [GO:0002474]; ATF6-mediated unfolded protein response [GO:0036500]; cardiac muscle cell differentiation [GO:0055007]; cellular calcium ion homeostasis [GO:0006874]; cellular response to lithium ion [GO:0071285]; cellul…	androgen receptor binding [GO:0050681]; calcium ion binding [GO:0005509]; carbohydrate binding [GO:0030246]; chaperone binding [GO:0051087]; complement component C1q binding [GO:0001849]; DNA binding [GO:0003677]; hormone binding [GO:0042562]; integrin binding [GO:0005178]; iron ion binding [GO:0005506]; mRNA binding [GO:0003729]; peptide binding [GO:0042277]; protein folding chaperone [GO:004418…	acrosomal vesicle [GO:0001669]; cell [GO:0005623]; cell surface [GO:0009986]; collagen-containing extracellular matrix [GO:0062023]; cytoplasm [GO:0005737]; cytosol [GO:0005829]; endocytic vesicle lumen [GO:0071682]; endoplasmic reticulum [GO:0005783]; endoplasmic reticulum-Golgi intermediate compartment membrane [GO:0033116]; endoplasmic reticulum lumen [GO:0005788]; endoplasmic reticulum membra…	GO:0000122; GO:0001669; GO:0001849; GO:0002474; GO:0002479; GO:0002502; GO:0003677; GO:0003723; GO:0003729; GO:0005178; GO:0005506; GO:0005509; GO:0005576; GO:0005615; GO:0005623; GO:0005634; GO:0005635; GO:0005737; GO:0005783; GO:0005788; GO:0005789; GO:0005790; GO:0005794; GO:0005829; GO:0005844; GO:0005925; GO:0006355; GO:0006457; GO:0006611; GO:0006874; GO:0006898; GO:0007283; GO:0008270; GO:…	R-HSA-1236974;R-HSA-168316;R-HSA-3000480;R-HSA-3000484;R-HSA-381183;R-HSA-901042;R-HSA-983170;	hsa:811;	22.2193	22.2235	22.2478	22.3796	22.2007	22.8317	22.8308	22.9061	22.7785	22.8011
PCBP3_E9PFP8	-1.0246	-1.00676	-1.09868	-0.502971	-1.01441	0.861328	0.659505	1.07076	0.953826	1.10199	PCBP3	Poly(rC)-binding protein 3	E9PFP8	1.05421	2.43802e-08	1.3092e-06	-0.894362					RNA binding [GO:0003723]		GO:0003723			16.453	16.4616	16.4174	16.704	16.4579	17.3603	17.2632	17.4611	17.4048	17.4761
MYLK_Q15746	0.833727	0.852588	0.927362	1.04144	0.995742	-0.787145	-1.19994	-1.25202	-0.801648	-0.610104	MYLK	Myosin light chain kinase, smooth muscle;Myosin light chain kinase, smooth muscle, deglutamylated form	Q15746	1.04293	2.48579e-08	1.31674e-06	0.740512	FUNCTION: Calcium/calmodulin-dependent myosin light chain kinase implicated in smooth muscle contraction via phosphorylation of myosin light chains (MLC). Also regulates actin-myosin interaction through a non-kinase activity. Phosphorylates PTK2B/PYK2 and myosin light-chains. Involved in the inflammatory response (e.g. apoptosis, vascular permeability, leukocyte diapedesis), cell motility and mor…	SUBCELLULAR LOCATION: Cytoplasm {ECO:0000269|PubMed:20053363}. Cell projection, lamellipodium {ECO:0000269|PubMed:20053363}. Cleavage furrow {ECO:0000269|PubMed:15020676}. Cytoplasm, cytoskeleton, stress fiber {ECO:0000269|PubMed:15020676}. Note=Localized to stress fibers during interphase and to the cleavage furrow during mitosis. {ECO:0000269|PubMed:15020676}.	DISEASE: Aortic aneurysm, familial thoracic 7 (AAT7) [MIM:613780]: A disease characterized by permanent dilation of the thoracic aorta usually due to degenerative changes in the aortic wall. It is primarily associated with a characteristic histologic appearance known as 'medial necrosis' or 'Erdheim cystic medial necrosis' in which there is degeneration and fragmentation of elastic fibers, loss o…	aorta smooth muscle tissue morphogenesis [GO:0060414]; bleb assembly [GO:0032060]; cardiovascular system development [GO:0072358]; cellular hypotonic response [GO:0071476]; muscle contraction [GO:0006936]; positive regulation of calcium ion transport [GO:0051928]; positive regulation of cell migration [GO:0030335]; positive regulation of wound healing [GO:0090303]; protein phosphorylation [GO:000…	actin binding [GO:0003779]; ATP binding [GO:0005524]; calmodulin binding [GO:0005516]; metal ion binding [GO:0046872]; myosin light chain kinase activity [GO:0004687]; protein kinase activity [GO:0004672]	actin cytoskeleton [GO:0015629]; cleavage furrow [GO:0032154]; cytoplasm [GO:0005737]; cytosol [GO:0005829]; lamellipodium [GO:0030027]; plasma membrane [GO:0005886]; stress fiber [GO:0001725]	GO:0001725; GO:0003779; GO:0004672; GO:0004687; GO:0005516; GO:0005524; GO:0005737; GO:0005829; GO:0005886; GO:0006468; GO:0006936; GO:0006939; GO:0014820; GO:0015629; GO:0030027; GO:0030335; GO:0032060; GO:0032154; GO:0046872; GO:0051928; GO:0060414; GO:0071476; GO:0072358; GO:0090303	R-HSA-445355;R-HSA-5627123;	hsa:4638;	17.9509	17.9584	17.9881	18.0335	18.0154	17.3057	17.1414	17.1206	17.2999	17.3761
TMSB4X_P62328	-0.791686	-0.942407	-1.07451	-0.766609	-1.06948	0.742939	1.18019	1.21008	0.6014	0.910083	TMSB4X	Thymosin beta-4;Hematopoietic system regulatory peptide	P62328	1.05119	2.48895e-08	1.31674e-06	-1.04955	FUNCTION: Plays an important role in the organization of the cytoskeleton (By similarity). Binds to and sequesters actin monomers (G actin) and therefore inhibits actin polymerization. {ECO:0000250}.; FUNCTION: Seraspenide inhibits the entry of hematopoietic pluripotent stem cells into the S-phase. {ECO:0000250}.	SUBCELLULAR LOCATION: Cytoplasm, cytoskeleton.		actin filament organization [GO:0007015]; cytoplasmic sequestering of NF-kappaB [GO:0007253]; negative regulation of interleukin-8 secretion [GO:2000483]; negative regulation of NF-kappaB transcription factor activity [GO:0032088]; negative regulation of NIK/NF-kappaB signaling [GO:1901223]; negative regulation of RNA polymerase II regulatory region sequence-specific DNA binding [GO:1903026]; pla…	actin monomer binding [GO:0003785]; enzyme binding [GO:0019899]; RNA binding [GO:0003723]	cell [GO:0005623]; cytoplasm [GO:0005737]; cytoskeleton [GO:0005856]; cytosol [GO:0005829]; extracellular region [GO:0005576]; nucleus [GO:0005634]; platelet alpha granule lumen [GO:0031093]	GO:0002576; GO:0003723; GO:0003785; GO:0005576; GO:0005623; GO:0005634; GO:0005737; GO:0005829; GO:0005856; GO:0007015; GO:0007253; GO:0019899; GO:0030334; GO:0031093; GO:0032088; GO:0033209; GO:0042989; GO:0043536; GO:0050727; GO:1901222; GO:1901223; GO:1903026; GO:1905273; GO:2000483; GO:2001028; GO:2001171	R-HSA-114608;	hsa:7114;	20.5813	20.4962	20.4216	20.5955	20.4244	21.4483	21.6953	21.7122	21.3683	21.5427
LGALS3_P17931	-0.840246	-0.800696	-1.18525	-0.930581	-0.903383	0.683751	1.24082	1.07472	0.941264	0.7196	LGALS3	Galectin-3;Galectin	P17931	1.02868	2.53645e-08	1.33201e-06	-0.553406	FUNCTION: Galactose-specific lectin which binds IgE. May mediate with the alpha-3, beta-1 integrin the stimulation by CSPG4 of endothelial cells migration. Together with DMBT1, required for terminal differentiation of columnar epithelial cells during early embryogenesis (By similarity). In the nucleus: acts as a pre-mRNA splicing factor. Involved in acute inflammatory responses including neutroph…	SUBCELLULAR LOCATION: Cytoplasm. Nucleus. Secreted. Note=Secreted by a non-classical secretory pathway and associates with the cell surface.		antimicrobial humoral immune response mediated by antimicrobial peptide [GO:0061844]; eosinophil chemotaxis [GO:0048245]; epithelial cell differentiation [GO:0030855]; innate immune response [GO:0045087]; killing of cells of other organism [GO:0031640]; macrophage chemotaxis [GO:0048246]; monocyte chemotaxis [GO:0002548]; mononuclear cell migration [GO:0071674]; mRNA processing [GO:0006397]; nega…	carbohydrate binding [GO:0030246]; chemoattractant activity [GO:0042056]; IgE binding [GO:0019863]; laminin binding [GO:0043236]; oligosaccharide binding [GO:0070492]; protein phosphatase binding [GO:0019903]; protein phosphatase inhibitor activity [GO:0004864]; RNA binding [GO:0003723]	cell surface [GO:0009986]; collagen-containing extracellular matrix [GO:0062023]; cytoplasm [GO:0005737]; extracellular exosome [GO:0070062]; extracellular region [GO:0005576]; extracellular space [GO:0005615]; ficolin-1-rich granule membrane [GO:0101003]; immunological synapse [GO:0001772]; membrane [GO:0016020]; mitochondrial inner membrane [GO:0005743]; nucleus [GO:0005634]; other organism cel…	GO:0001772; GO:0002548; GO:0003723; GO:0004864; GO:0005576; GO:0005615; GO:0005634; GO:0005681; GO:0005737; GO:0005743; GO:0005886; GO:0006397; GO:0008380; GO:0009986; GO:0016020; GO:0019863; GO:0019903; GO:0030246; GO:0030593; GO:0030667; GO:0030855; GO:0031640; GO:0042056; GO:0042129; GO:0043236; GO:0043312; GO:0044216; GO:0045087; GO:0045637; GO:0045806; GO:0048245; GO:0048246; GO:0050860; GO:…	R-HSA-6798695;R-HSA-879415;R-HSA-8939246;R-HSA-8941333;	hsa:3958;	19.3258	19.3375	19.2234	19.299	19.307	19.7782	19.9436	19.8943	19.8547	19.7889
SLC2A3_P11169	-0.906692	-0.709437	-1.01807	-0.947223	-1.07598	0.698709	1.33119	0.813232	0.996004	0.818262	SLC2A3	Solute carrier family 2, facilitated glucose transporter member 3;Solute carrier family 2, facilitated glucose transporter member 14	P11169	1.0321	2.59202e-08	1.35125e-06	-0.584811	FUNCTION: Facilitative glucose transporter that can also mediate the uptake of various other monosaccharides across the cell membrane (PubMed:9477959, PubMed:26176916). Mediates the uptake of glucose, 2-deoxyglucose, galactose, mannose, xylose and fucose, and probably also dehydroascorbate (PubMed:9477959, PubMed:26176916). Does not mediate fructose transport (PubMed:9477959, PubMed:26176916). {E…	SUBCELLULAR LOCATION: Cell membrane {ECO:0000269|PubMed:9477959, ECO:0000305|PubMed:26176916}; Multi-pass membrane protein {ECO:0000269|PubMed:26176916}. Perikaryon {ECO:0000250|UniProtKB:Q07647}. Cell projection {ECO:0000250|UniProtKB:Q07647}. Note=Localized to densely spaced patches along neuronal processes. {ECO:0000250|UniProtKB:Q07647}.		carbohydrate metabolic process [GO:0005975]; glucose transmembrane transport [GO:1904659]; L-ascorbic acid metabolic process [GO:0019852]; neutrophil degranulation [GO:0043312]	glucose binding [GO:0005536]; glucose transmembrane transporter activity [GO:0005355]	cell projection [GO:0042995]; extracellular exosome [GO:0070062]; ficolin-1-rich granule membrane [GO:0101003]; integral component of membrane [GO:0016021]; integral component of plasma membrane [GO:0005887]; perikaryon [GO:0043204]; plasma membrane [GO:0005886]; secretory granule membrane [GO:0030667]; specific granule membrane [GO:0035579]; tertiary granule membrane [GO:0070821]	GO:0005355; GO:0005536; GO:0005886; GO:0005887; GO:0005975; GO:0016021; GO:0019852; GO:0030667; GO:0035579; GO:0042995; GO:0043204; GO:0043312; GO:0070062; GO:0070821; GO:0101003; GO:1904659	R-HSA-189200;R-HSA-196836;R-HSA-6798695;R-HSA-9022699;	hsa:6515;	18.2273	18.2892	18.1924	18.2146	18.1742	18.7313	18.9298	18.7672	18.8246	18.7688
GGCX_P38435	-1.08675	-1.05127	-1.09318	-0.629685	-0.800065	0.870925	0.815455	0.95642	0.777281	1.24087	GGCX	Vitamin K-dependent gamma-carboxylase	P38435	1.03006	2.62826e-08	1.36022e-06	-0.535008	FUNCTION: Mediates the vitamin K-dependent carboxylation of glutamate residues to calcium-binding gamma-carboxyglutamate (Gla) residues with the concomitant conversion of the reduced hydroquinone form of vitamin K to vitamin K epoxide. {ECO:0000269|PubMed:17073445}.	SUBCELLULAR LOCATION: Endoplasmic reticulum membrane {ECO:0000269|PubMed:10910912}; Multi-pass membrane protein {ECO:0000269|PubMed:10910912}.	DISEASE: Combined deficiency of vitamin K-dependent clotting factors 1 (VKCFD1) [MIM:277450]: VKCFD leads to a bleeding tendency that is usually reversed by oral administration of vitamin K. {ECO:0000269|PubMed:10934213, ECO:0000269|PubMed:11071668, ECO:0000269|PubMed:15287948, ECO:0000269|PubMed:9845520}. Note=The disease is caused by mutations affecting the gene represented in this entry.; DISE…	blood coagulation [GO:0007596]; cellular protein modification process [GO:0006464]; peptidyl-glutamic acid carboxylation [GO:0017187]	gamma-glutamyl carboxylase activity [GO:0008488]	endoplasmic reticulum membrane [GO:0005789]; integral component of membrane [GO:0016021]; membrane [GO:0016020]	GO:0005789; GO:0006464; GO:0007596; GO:0008488; GO:0016020; GO:0016021; GO:0017187	R-HSA-159740;	hsa:2677;	17.7515	17.7617	17.7497	17.8827	17.8338	18.3133	18.2974	18.3378	18.2864	18.4194
RTTN_J3KTD2	-0.848766	-0.987278	-0.973675	-0.634495	-1.19639	0.83004	0.867803	0.76916	0.834845	1.33876	RTTN	Rotatin	J3KTD2	1.09537	2.66108e-08	1.36349e-06	-1.40999				cilium organization [GO:0044782]		centrosome [GO:0005813]; ciliary basal body [GO:0036064]	GO:0005813; GO:0036064; GO:0044782			14.8444	14.7392	14.7496	15.0072	14.5804	16.1196	16.1483	16.0734	16.1233	16.5061
COPB2_P35606	-0.956177	-0.894144	-1.08742	-0.731057	-1.01092	0.792958	0.949551	0.883407	0.774474	1.27933	COPB2	Coatomer subunit beta	P35606	1.01848	2.67276e-08	1.36349e-06	-0.398242	FUNCTION: The coatomer is a cytosolic protein complex that binds to dilysine motifs and reversibly associates with Golgi non-clathrin-coated vesicles, which further mediate biosynthetic protein transport from the ER, via the Golgi up to the trans Golgi network. Coatomer complex is required for budding from Golgi membranes, and is essential for the retrograde Golgi-to-ER transport of dilysine-tagg…	SUBCELLULAR LOCATION: Cytoplasm, cytosol {ECO:0000250}. Golgi apparatus membrane {ECO:0000250}; Peripheral membrane protein {ECO:0000250}; Cytoplasmic side {ECO:0000250}. Cytoplasmic vesicle, COPI-coated vesicle membrane {ECO:0000250}; Peripheral membrane protein {ECO:0000250}; Cytoplasmic side {ECO:0000250}. Note=The coatomer is cytoplasmic or polymerized on the cytoplasmic side of the Golgi, as…	DISEASE: Microcephaly 19, primary, autosomal recessive (MCPH19) [MIM:617800]: A form of microcephaly, a disease defined as a head circumference more than 3 standard deviations below the age, sex and ethnically matched mean. Brain weight is markedly reduced and the cerebral cortex is disproportionately small. MCPH19 affected individuals manifest severe developmental delay, failure to thrive, corti…	endoplasmic reticulum to Golgi vesicle-mediated transport [GO:0006888]; intracellular protein transport [GO:0006886]; intra-Golgi vesicle-mediated transport [GO:0006891]; retrograde vesicle-mediated transport, Golgi to endoplasmic reticulum [GO:0006890]; toxin transport [GO:1901998]	structural molecule activity [GO:0005198]	COPI vesicle coat [GO:0030126]; cytosol [GO:0005829]; endoplasmic reticulum membrane [GO:0005789]; Golgi membrane [GO:0000139]; transport vesicle [GO:0030133]	GO:0000139; GO:0005198; GO:0005789; GO:0005829; GO:0006886; GO:0006888; GO:0006890; GO:0006891; GO:0030126; GO:0030133; GO:1901998	R-HSA-6807878;R-HSA-6811434;	hsa:9276;	21.5415	21.5547	21.5135	21.5894	21.5298	21.9136	21.9469	21.9328	21.9097	22.0171
LGALS8_O00214	-0.864243	-0.685479	-0.910697	-0.846195	-1.34767	0.828851	0.967767	1.03986	0.729357	1.08845	LGALS8	Galectin-8;Galectin	O00214	1.03777	2.6934e-08	1.36428e-06	-0.622341	FUNCTION: Beta-galactoside-binding lectin that acts as a sensor of membrane damage caused by infection and restricts the proliferation of infecting pathogens by targeting them for autophagy (PubMed:22246324, PubMed:28077878). Detects membrane rupture by binding beta-galactoside ligands located on the lumenal side of the endosome membrane; these ligands becoming exposed to the cytoplasm following …	SUBCELLULAR LOCATION: Cytoplasmic vesicle {ECO:0000269|PubMed:22246324}. Cytoplasm, cytosol {ECO:0000269|PubMed:22246324}.		cellular response to virus [GO:0098586]; lymphatic endothelial cell migration [GO:1904977]; xenophagy [GO:0098792]	carbohydrate binding [GO:0030246]; integrin binding [GO:0005178]	cytoplasm [GO:0005737]; cytoplasmic vesicle [GO:0031410]; cytosol [GO:0005829]; extracellular space [GO:0005615]; membrane [GO:0016020]	GO:0005178; GO:0005615; GO:0005737; GO:0005829; GO:0016020; GO:0030246; GO:0031410; GO:0098586; GO:0098792; GO:1904977		hsa:3964;	16.4978	16.5575	16.4822	16.5038	16.3362	17.0637	17.1102	17.1343	17.0305	17.1505
VPS26A_O75436	-1.13883	-1.07243	-0.899222	-0.764341	-0.803969	0.832858	0.755916	1.06642	0.832952	1.19065	VPS26A	Vacuolar protein sorting-associated protein 26A	O75436	1.02063	2.72588e-08	1.36624e-06	-0.400593	FUNCTION: Acts as component of the retromer cargo-selective complex (CSC). The CSC is believed to be the core functional component of retromer or respective retromer complex variants acting to prevent missorting of selected transmembrane cargo proteins into the lysosomal degradation pathway. The recruitment of the CSC to the endosomal membrane involves RAB7A and SNX3. The SNX-BAR retromer mediate…	SUBCELLULAR LOCATION: Cytoplasm {ECO:0000269|PubMed:15078903}. Endosome membrane {ECO:0000269|PubMed:22431521}; Peripheral membrane protein {ECO:0000250|UniProtKB:P40336}. Early endosome {ECO:0000269|PubMed:15078903, ECO:0000269|PubMed:16190980, ECO:0000269|PubMed:16732284, ECO:0000269|PubMed:20682791}. Note=Localizes to tubular profiles adjacent to endosomes (PubMed:15078903). Predominantly foun…		intracellular protein transport [GO:0006886]; regulation of macroautophagy [GO:0016241]; retrograde transport, endosome to Golgi [GO:0042147]; retrograde transport, endosome to plasma membrane [GO:1990126]; Wnt signaling pathway [GO:0016055]		cytosol [GO:0005829]; early endosome [GO:0005769]; endosome [GO:0005768]; endosome membrane [GO:0010008]; lysosome [GO:0005764]; retromer, cargo-selective complex [GO:0030906]; retromer complex [GO:0030904]; tubular endosome [GO:0097422]; vesicle [GO:0031982]	GO:0005764; GO:0005768; GO:0005769; GO:0005829; GO:0006886; GO:0010008; GO:0016055; GO:0016241; GO:0030904; GO:0030906; GO:0031982; GO:0042147; GO:0097422; GO:1990126	R-HSA-3238698;	hsa:9559;	19.3777	19.3919	19.429	19.4578	19.4493	19.7997	19.7832	19.8497	19.7997	19.8763
SP100_P23497	-0.898122	-1.02178	-0.894459	-0.581666	-1.27532	0.84445	0.966136	0.894599	0.934091	1.03207	SP100	Nuclear autoantigen Sp-100	P23497	1.02307	2.73554e-08	1.36624e-06	-0.440628	FUNCTION: Together with PML, this tumor suppressor is a major constituent of the PML bodies, a subnuclear organelle involved in a large number of physiological processes including cell growth, differentiation and apoptosis. Functions as a transcriptional coactivator of ETS1 and ETS2 according to PubMed:11909962. Under certain conditions, it may also act as a corepressor of ETS1 preventing its bin…	SUBCELLULAR LOCATION: Nucleus. Nucleus, PML body {ECO:0000269|PubMed:27211601}. Cytoplasm. Note=Differences in the subnuclear localization of the different isoforms seem to exist and may also be cell cycle- and interferon-dependent. Accumulates in the cytoplasm upon FAS activation.; SUBCELLULAR LOCATION: Isoform Sp100-C: Nucleus {ECO:0000269|PubMed:11313457}. Note=Forms a reticulate or track-like…		DNA damage response, signal transduction by p53 class mediator resulting in transcription of p21 class mediator [GO:0006978]; interferon-gamma-mediated signaling pathway [GO:0060333]; maintenance of protein location [GO:0045185]; negative regulation of cellular component movement [GO:0051271]; negative regulation of DNA binding [GO:0043392]; negative regulation of DNA-binding transcription factor…	chromo shadow domain binding [GO:0070087]; DNA binding [GO:0003677]; DNA-binding transcription factor activity, RNA polymerase II-specific [GO:0000981]; identical protein binding [GO:0042802]; kinase binding [GO:0019900]; protein dimerization activity [GO:0046983]; protein domain specific binding [GO:0019904]; protein homodimerization activity [GO:0042803]; transcription factor binding [GO:000813…	cytoplasm [GO:0005737]; nuclear body [GO:0016604]; nuclear chromosome, telomeric region [GO:0000784]; nuclear periphery [GO:0034399]; nucleolus [GO:0005730]; nucleoplasm [GO:0005654]; nucleus [GO:0005634]; PML body [GO:0016605]	GO:0000122; GO:0000723; GO:0000784; GO:0000981; GO:0003677; GO:0005634; GO:0005654; GO:0005730; GO:0005737; GO:0006978; GO:0008134; GO:0010596; GO:0016032; GO:0016604; GO:0016605; GO:0019900; GO:0019904; GO:0032526; GO:0032897; GO:0034097; GO:0034340; GO:0034341; GO:0034399; GO:0042802; GO:0042803; GO:0043392; GO:0043433; GO:0045185; GO:0045765; GO:0045892; GO:0045893; GO:0046826; GO:0046983; GO:…	R-HSA-3108214;R-HSA-877300;	hsa:6672;	19.1075	19.0784	19.1084	19.1821	19.0186	19.5184	19.5471	19.5303	19.5396	19.5627
HSP90AB2P_Q58FF8	-1.18136	-1.1096	-0.758392	-0.573794	-1.03618	0.975463	0.888955	1.04427	0.751923	0.998718	HSP90AB2P	Putative heat shock protein HSP 90-beta 2	Q58FF8	1.03029	2.79125e-08	1.38438e-06	-0.539007	FUNCTION: Putative molecular chaperone that may promote the maturation, structural maintenance and proper regulation of specific target proteins. {ECO:0000250}.	SUBCELLULAR LOCATION: Cytoplasm {ECO:0000250}.		cellular response to heat [GO:0034605]; protein folding [GO:0006457]; protein stabilization [GO:0050821]	ATP binding [GO:0005524]; disordered domain specific binding [GO:0097718]; unfolded protein binding [GO:0051082]	cell surface [GO:0009986]; cytoplasm [GO:0005737]; cytosol [GO:0005829]; extracellular exosome [GO:0070062]; perinuclear region of cytoplasm [GO:0048471]; plasma membrane [GO:0005886]; protein-containing complex [GO:0032991]	GO:0005524; GO:0005737; GO:0005829; GO:0005886; GO:0006457; GO:0009986; GO:0032991; GO:0034605; GO:0048471; GO:0050821; GO:0051082; GO:0070062; GO:0097718			17.7233	17.744	17.8456	17.899	17.7653	18.3471	18.322	18.367	18.2824	18.3538
SDHAF3_F8W9V1	-0.837709	-0.82302	-1.00979	-0.728436	-1.24729	0.79321	0.833046	0.833167	1.32412	0.862696	SDHAF3	Succinate dehydrogenase assembly factor 3, mitochondrial	F8W9V1	1.05129	2.8633e-08	1.41032e-06	-0.796455				mitochondrial respiratory chain complex II assembly [GO:0034553]		mitochondrion [GO:0005739]	GO:0005739; GO:0034553			15.5684	15.5747	15.4947	15.6152	15.3929	16.2673	16.2844	16.2845	16.4948	16.2971
CYB5R1_Q9UHQ9	-1.08068	-0.942289	-1.01765	-0.627631	-0.993529	0.945577	0.70037	0.981951	0.782019	1.25187	CYB5R1	NADH-cytochrome b5 reductase 1	Q9UHQ9	1.02795	2.92221e-08	1.41467e-06	-0.50315	FUNCTION: NADH-cytochrome b5 reductases are involved in desaturation and elongation of fatty acids, cholesterol biosynthesis, drug metabolism, and, in erythrocyte, methemoglobin reduction. {ECO:0000250}.	SUBCELLULAR LOCATION: Membrane {ECO:0000305}; Single-pass membrane protein {ECO:0000305}.		bicarbonate transport [GO:0015701]; platelet degranulation [GO:0002576]; sterol biosynthetic process [GO:0016126]	cytochrome-b5 reductase activity, acting on NAD(P)H [GO:0004128]; FAD binding [GO:0071949]	endoplasmic reticulum membrane [GO:0005789]; extracellular exosome [GO:0070062]; integral component of membrane [GO:0016021]; membrane [GO:0016020]; mitochondrion [GO:0005739]; plasma membrane [GO:0005886]; platelet alpha granule membrane [GO:0031092]	GO:0002576; GO:0004128; GO:0005739; GO:0005789; GO:0005886; GO:0015701; GO:0016020; GO:0016021; GO:0016126; GO:0031092; GO:0070062; GO:0071949	R-HSA-114608;R-HSA-1237044;	hsa:51706;	17.9588	17.9962	17.9758	18.0811	17.9823	18.5056	18.4394	18.5154	18.4614	18.5882
SEC11A_H0YNG3	-0.934705	-0.999702	-1.14339	-0.634834	-0.956102	0.870176	0.79021	0.799237	0.959791	1.24932	SEC11A	Signal peptidase complex catalytic subunit SEC11;Signal peptidase complex catalytic subunit SEC11A;Signal peptidase I	H0YNG3	1.02412	2.93105e-08	1.41467e-06	-0.447862		SUBCELLULAR LOCATION: Endoplasmic reticulum membrane {ECO:0000256|RuleBase:RU362047}.		signal peptide processing [GO:0006465]	serine-type peptidase activity [GO:0008236]	integral component of membrane [GO:0016021]; signal peptidase complex [GO:0005787]	GO:0005787; GO:0006465; GO:0008236; GO:0016021			18.5683	18.5527	18.5183	18.6402	18.5632	19.0012	18.982	18.9842	19.0227	19.0921
RAB39A_Q14964	-0.755602	-0.847722	-1.23362	-0.71851	-1.10308	0.697915	0.920603	1.02097	0.867488	1.15155	RAB39A	Ras-related protein Rab-39A	Q14964	1.03175	2.93155e-08	1.41467e-06	-0.536158	FUNCTION: Plays a role in the maturation and acidification of phagosomes that engulf pathogens, such as S.aureus and M.tuberculosis. Plays a role in vesicular trafficking. Plays a role in the fusion of phagosomes with lysosomes. Negatively regulates LPS-induced autophagosome formation in macrophages possibly by implicating PI3K (PubMed:24349490). May be involved in multiple neurite formation (By …	SUBCELLULAR LOCATION: Cell membrane {ECO:0000305}; Lipid-anchor {ECO:0000305}; Cytoplasmic side {ECO:0000305}. Cytoplasmic vesicle, phagosome {ECO:0000269|PubMed:21255211}. Cytoplasmic vesicle, phagosome membrane {ECO:0000269|PubMed:24349490}; Lipid-anchor {ECO:0000250}; Cytoplasmic side {ECO:0000250}. Lysosome {ECO:0000269|PubMed:24349490}. Note=Recruited to phagosomes containing S.aureus or M.t…		autophagy [GO:0006914]; intracellular protein transport [GO:0006886]; phagosome acidification [GO:0090383]; phagosome-lysosome fusion [GO:0090385]; Rab protein signal transduction [GO:0032482]	GTPase activity [GO:0003924]; GTP binding [GO:0005525]	cell [GO:0005623]; cytosol [GO:0005829]; Golgi membrane [GO:0000139]; lysosome [GO:0005764]; phagocytic vesicle [GO:0045335]; phagocytic vesicle membrane [GO:0030670]; plasma membrane [GO:0005886]	GO:0000139; GO:0003924; GO:0005525; GO:0005623; GO:0005764; GO:0005829; GO:0005886; GO:0006886; GO:0006914; GO:0030670; GO:0032482; GO:0045335; GO:0090383; GO:0090385	R-HSA-6811438;R-HSA-8873719;R-HSA-8876198;	hsa:54734;	16.9401	16.9136	16.8026	16.9508	16.8401	17.3583	17.4224	17.4513	17.4071	17.4889
SLMO2_Q9Y3B1	1.04612	1.1554	0.582795	1.01569	0.854228	-0.849654	-0.86054	-0.732619	-0.993088	-1.21833	SLMO2	Protein slowmo homolog 2	Q9Y3B1	1.03702	2.99271e-08	1.42768e-06	0.586562				phospholipid transport [GO:0015914]	phosphatidic acid transfer activity [GO:1990050]	mitochondrial intermembrane space [GO:0005758]	GO:0005758; GO:0015914; GO:1990050		hsa:51012;	16.4669	16.5013	16.3209	16.4573	16.4064	15.8696	15.8661	15.9064	15.8244	15.7534
RFK_Q969G6	-0.824741	-0.920074	-1.10615	-0.701919	-1.09055	0.787435	0.866992	0.861562	0.754938	1.3725	RFK	Riboflavin kinase	Q969G6	1.05439	2.99943e-08	1.42768e-06	-0.875621	FUNCTION: Catalyzes the phosphorylation of riboflavin (vitamin B2) to form flavin-mononucleotide (FMN), hence rate-limiting enzyme in the synthesis of FAD. Essential for TNF-induced reactive oxygen species (ROS) production. Through its interaction with both TNFRSF1A and CYBA, physically and functionally couples TNFRSF1A to NADPH oxidase. TNF-activation of RFK may enhance the incorporation of FAD …	SUBCELLULAR LOCATION: Cytoplasm {ECO:0000250}.		apoptotic process [GO:0006915]; FMN biosynthetic process [GO:0009398]; positive regulation of NAD(P)H oxidase activity [GO:0033864]; reactive oxygen species metabolic process [GO:0072593]; riboflavin biosynthetic process [GO:0009231]; riboflavin metabolic process [GO:0006771]	ATP binding [GO:0005524]; metal ion binding [GO:0046872]; riboflavin kinase activity [GO:0008531]	cytoplasm [GO:0005737]; cytosol [GO:0005829]	GO:0005524; GO:0005737; GO:0005829; GO:0006771; GO:0006915; GO:0008531; GO:0009231; GO:0009398; GO:0033864; GO:0046872; GO:0072593	R-HSA-196843;	hsa:55312;	16.1466	16.1016	16.0139	16.2045	16.0212	16.9066	16.9441	16.9415	16.8913	17.1824
CDIPT_H3BUR9	-1.18644	-0.873221	-1.01556	-0.979842	-0.610335	0.981106	0.662915	1.12348	0.931106	0.966798	CDIPT	CDP-diacylglycerol--inositol 3-phosphatidyltransferase	H3BUR9	1.03103	3.01847e-08	1.42768e-06	-0.466872				phospholipid biosynthetic process [GO:0008654]	phosphotransferase activity, for other substituted phosphate groups [GO:0016780]	membrane [GO:0016020]	GO:0008654; GO:0016020; GO:0016780			14.9808	15.0592	15.0236	15.0325	15.125	15.5231	15.4435	15.5587	15.5106	15.5195
PYGL_P06737	-0.959429	-0.967136	-0.9253	-0.818634	-0.999698	0.808225	0.958091	0.834852	0.710616	1.35841	PYGL	Glycogen phosphorylase, liver form	P06737	1.01998	3.04599e-08	1.43122e-06	-0.43342	FUNCTION: Phosphorylase is an important allosteric enzyme in carbohydrate metabolism. Enzymes from different sources differ in their regulatory mechanisms and in their natural substrates. However, all known phosphorylases share catalytic and structural properties.		DISEASE: Glycogen storage disease 6 (GSD6) [MIM:232700]: A metabolic disorder characterized by mild to moderate hypoglycemia, mild ketosis, growth retardation, and prominent hepatomegaly. Heart and skeletal muscle are not affected. {ECO:0000269|PubMed:9529348}. Note=The disease is caused by mutations affecting the gene represented in this entry.	5-phosphoribose 1-diphosphate biosynthetic process [GO:0006015]; glucose homeostasis [GO:0042593]; glycogen catabolic process [GO:0005980]; glycogen metabolic process [GO:0005977]; necroptotic process [GO:0070266]; neutrophil degranulation [GO:0043312]; response to bacterium [GO:0009617]	AMP binding [GO:0016208]; ATP binding [GO:0005524]; bile acid binding [GO:0032052]; drug binding [GO:0008144]; glucose binding [GO:0005536]; glycogen phosphorylase activity [GO:0008184]; linear malto-oligosaccharide phosphorylase activity [GO:0102250]; protein homodimerization activity [GO:0042803]; purine nucleobase binding [GO:0002060]; pyridoxal phosphate binding [GO:0030170]; SHG alpha-glucan…	cytoplasm [GO:0005737]; cytosol [GO:0005829]; extracellular exosome [GO:0070062]; extracellular region [GO:0005576]; ficolin-1-rich granule lumen [GO:1904813]; secretory granule lumen [GO:0034774]	GO:0002060; GO:0005524; GO:0005536; GO:0005576; GO:0005737; GO:0005829; GO:0005977; GO:0005980; GO:0006015; GO:0008144; GO:0008184; GO:0009617; GO:0016208; GO:0019842; GO:0030170; GO:0032052; GO:0034774; GO:0042593; GO:0042803; GO:0043312; GO:0070062; GO:0070266; GO:0102250; GO:0102499; GO:1904813	R-HSA-6798695;R-HSA-70221;	hsa:5836;	21.6903	21.6885	21.6982	21.7229	21.6809	22.1004	22.1352	22.1066	22.0777	22.228
LNPEP_Q9UIQ6	-0.92226	-0.930099	-1.10485	-0.724449	-1.00811	0.931341	1.03968	1.17198	0.726232	0.820533	LNPEP	Leucyl-cystinyl aminopeptidase;Leucyl-cystinyl aminopeptidase, pregnancy serum form	Q9UIQ6	1.01849	3.10579e-08	1.44451e-06	-0.348262	FUNCTION: Release of an N-terminal amino acid, cleaves before cysteine, leucine as well as other amino acids. Degrades peptide hormones such as oxytocin, vasopressin and angiotensin III, and plays a role in maintaining homeostasis during pregnancy. May be involved in the inactivation of neuronal peptides in the brain. Cleaves Met-enkephalin and dynorphin. Binds angiotensin IV and may be the angio…	SUBCELLULAR LOCATION: Cell membrane {ECO:0000269|PubMed:11389728}; Single-pass type II membrane protein {ECO:0000269|PubMed:11389728}. Note=In brain only the membrane-bound form is found. The protein resides in intracellular vesicles together with GLUT4 and can then translocate to the cell surface in response to insulin and/or oxytocin. Localization may be determined by dileucine internalization …		antigen processing and presentation of exogenous peptide antigen via MHC class I, TAP-independent [GO:0002480]; cell-cell signaling [GO:0007267]; female pregnancy [GO:0007565]; negative regulation of cold-induced thermogenesis [GO:0120163]; peptide catabolic process [GO:0043171]; protein catabolic process [GO:0030163]; protein polyubiquitination [GO:0000209]; proteolysis [GO:0006508]; SMAD protei…	aminopeptidase activity [GO:0004177]; metalloaminopeptidase activity [GO:0070006]; metallopeptidase activity [GO:0008237]; peptide binding [GO:0042277]; zinc ion binding [GO:0008270]	cytoplasm [GO:0005737]; cytoplasmic vesicle membrane [GO:0030659]; cytosol [GO:0005829]; early endosome lumen [GO:0031905]; extracellular region [GO:0005576]; integral component of plasma membrane [GO:0005887]; lysosomal membrane [GO:0005765]; membrane [GO:0016020]; perinuclear region of cytoplasm [GO:0048471]	GO:0000209; GO:0002480; GO:0004177; GO:0005576; GO:0005737; GO:0005765; GO:0005829; GO:0005887; GO:0006508; GO:0007267; GO:0007565; GO:0008237; GO:0008270; GO:0016020; GO:0030163; GO:0030659; GO:0031905; GO:0042277; GO:0043171; GO:0048471; GO:0060395; GO:0070006; GO:0120163	R-HSA-1236977;R-HSA-1445148;R-HSA-983168;	hsa:4012;	18.839	18.8375	18.8051	18.8757	18.8231	19.1831	19.2032	19.2278	19.145	19.1626
ANXA5_P08758	-0.874769	-1.0661	-0.971704	-0.508732	-1.23467	0.942617	0.92912	0.953468	0.78499	1.04579	ANXA5	Annexin A5;Annexin	P08758	1.02508	3.11473e-08	1.44451e-06	-0.550876	FUNCTION: This protein is an anticoagulant protein that acts as an indirect inhibitor of the thromboplastin-specific complex, which is involved in the blood coagulation cascade.		DISEASE: Pregnancy loss, recurrent, 3 (RPRGL3) [MIM:614391]: A common complication of pregnancy, resulting in spontaneous abortion before the fetus has reached viability. The term includes all miscarriages from the time of conception until 24 weeks of gestation. Recurrent pregnancy loss is defined as 3 or more consecutive spontaneous abortions. {ECO:0000269|PubMed:17339269}. Note=Disease suscepti…	blood coagulation [GO:0007596]; cellular response to gonadotropin-releasing hormone [GO:0097211]; cellular response to lead ion [GO:0071284]; negative regulation of apoptotic process [GO:0043066]; negative regulation of blood coagulation [GO:0030195]; negative regulation of prolactin secretion [GO:1902721]; negative regulation of sequestering of calcium ion [GO:0051283]; platelet degranulation [G…	calcium-dependent phospholipid binding [GO:0005544]; calcium ion binding [GO:0005509]; calcium transmembrane transporter activity, phosphorylative mechanism [GO:0005388]; heparin binding [GO:0008201]; peptide hormone binding [GO:0017046]; phospholipase inhibitor activity [GO:0004859]; phospholipid binding [GO:0005543]; receptor tyrosine kinase binding [GO:0030971]	collagen-containing extracellular matrix [GO:0062023]; cytoplasm [GO:0005737]; cytosol [GO:0005829]; endothelial microparticle [GO:0072563]; external side of plasma membrane [GO:0009897]; extracellular exosome [GO:0070062]; extracellular region [GO:0005576]; focal adhesion [GO:0005925]; intracellular [GO:0005622]; membrane [GO:0016020]	GO:0002576; GO:0004859; GO:0005388; GO:0005509; GO:0005543; GO:0005544; GO:0005576; GO:0005622; GO:0005737; GO:0005829; GO:0005925; GO:0007165; GO:0007596; GO:0008201; GO:0009897; GO:0010033; GO:0016020; GO:0017046; GO:0030195; GO:0030971; GO:0043065; GO:0043066; GO:0051283; GO:0051592; GO:0062023; GO:0070062; GO:0071284; GO:0072563; GO:0097066; GO:0097211; GO:1901317; GO:1902721	R-HSA-114608;	hsa:308;	21.9824	21.9258	21.9538	22.0907	21.876	22.52	22.516	22.5232	22.4734	22.5505
ATF1_P18846	-0.818711	-1.12878	-0.879414	-0.700164	-1.14281	0.94274	1.14639	0.747019	0.769141	1.06459	ATF1	Cyclic AMP-dependent transcription factor ATF-1	P18846	1.0245	3.15423e-08	1.45339e-06	-0.43074	FUNCTION: This protein binds the cAMP response element (CRE) (consensus: 5'-GTGACGT[AC][AG]-3'), a sequence present in many viral and cellular promoters. Binds to the Tax-responsive element (TRE) of HTLV-I. Mediates PKA-induced stimulation of CRE-reporter genes. Represses the expression of FTH1 and other antioxidant detoxification genes. Triggers cell proliferation and transformation. {ECO:000026…	SUBCELLULAR LOCATION: Nucleus.	DISEASE: Angiomatoid fibrous histiocytoma (AFH) [MIM:612160]: A distinct variant of malignant fibrous histiocytoma that typically occurs in children and adolescents and is manifest by nodular subcutaneous growth. Characteristic microscopic features include lobulated sheets of histiocyte-like cells intimately associated with areas of hemorrhage and cystic pseudovascular spaces, as well as a striki…	cellular protein-containing complex assembly [GO:0034622]; positive regulation of DNA replication [GO:0045740]; positive regulation of neuron projection development [GO:0010976]; positive regulation of transcription by RNA polymerase II [GO:0045944]; response to cobalt ion [GO:0032025]; response to organic cyclic compound [GO:0014070]	DNA-binding transcription activator activity, RNA polymerase II-specific [GO:0001228]; DNA-binding transcription factor activity [GO:0003700]; DNA-binding transcription factor activity, RNA polymerase II-specific [GO:0000981]; identical protein binding [GO:0042802]; protein-containing complex binding [GO:0044877]; protein heterodimerization activity [GO:0046982]; RNA polymerase II regulatory regi…	ATF1-ATF4 transcription factor complex [GO:1990590]; nuclear chromatin [GO:0000790]; nucleoplasm [GO:0005654]; nucleus [GO:0005634]; transcription factor complex [GO:0005667]	GO:0000790; GO:0000977; GO:0000981; GO:0001228; GO:0003700; GO:0005634; GO:0005654; GO:0005667; GO:0010976; GO:0014070; GO:0032025; GO:0034622; GO:0042802; GO:0044877; GO:0045740; GO:0045944; GO:0046982; GO:1990590	R-HSA-199920;	hsa:466;	17.6086	17.5371	17.5946	17.6359	17.5338	18.0147	18.0617	17.9696	17.9747	18.0428
BLVRA_P53004	-0.882514	-1.15956	-1.00088	-0.616765	-1.01523	0.915326	0.801875	0.859033	0.903319	1.1954	BLVRA	Biliverdin reductase A	P53004	1.0205	3.19729e-08	1.46378e-06	-0.402325	FUNCTION: Reduces the gamma-methene bridge of the open tetrapyrrole, biliverdin IX alpha, to bilirubin with the concomitant oxidation of a NADH or NADPH cofactor.	SUBCELLULAR LOCATION: Cytoplasm.	DISEASE: Hyperbiliverdinemia (HBLVD) [MIM:614156]: A condition characterized by a green discoloration of the skin, urine, serum, and other bodily fluids. It is due to increased biliverdin resulting from inefficient conversion to bilirubin. Affected individuals appear to have symptoms only in the context of obstructive cholestasis and/or liver failure. In some cases, green jaundice can resolve aft…	heme catabolic process [GO:0042167]; oxidation-reduction process [GO:0055114]	biliverdin reductase activity [GO:0004074]; zinc ion binding [GO:0008270]	cytosol [GO:0005829]; extracellular exosome [GO:0070062]	GO:0004074; GO:0005829; GO:0008270; GO:0042167; GO:0055114; GO:0070062	R-HSA-189483;	hsa:644;	19.6341	19.5745	19.6087	19.6913	19.6056	20.0209	19.9965	20.0088	20.0183	20.0812
KCNJ16_K7EKJ4	-1.07983	-1.08327	-0.875044	-0.601369	-1.00459	1.01094	0.942838	0.914396	0.571783	1.20414	KCNJ16	Inward rectifier potassium channel 16	K7EKJ4	1.04951	3.24082e-08	1.47426e-06	-0.777578					inward rectifier potassium channel activity [GO:0005242]	membrane [GO:0016020]	GO:0005242; GO:0016020			15.6429	15.6415	15.7286	15.8432	15.6744	16.5181	16.4896	16.4777	16.3342	16.5989
MRPL35_D3YTC1	0.88744	1.02937	0.834611	0.741268	1.1462	-0.536938	-1.06831	-1.26384	-0.881529	-0.888268	MRPL35	39S ribosomal protein L35, mitochondrial	D3YTC1	1.06046	3.36649e-08	1.51253e-06	1.00069				translation [GO:0006412]	structural constituent of ribosome [GO:0003735]	ribosome [GO:0005840]	GO:0003735; GO:0005840; GO:0006412			17.53	17.6066	17.5015	17.4512	17.6696	16.7619	16.4753	16.3698	16.576	16.5724
NDUFV1_G3V0I5	-1.21247	-0.755421	-0.908792	-0.825894	-0.983259	0.931629	0.737603	0.914222	0.935767	1.16662	NDUFV1	NADH dehydrogenase [ubiquinone] flavoprotein 1, mitochondrial	G3V0I5	1.01808	3.37985e-08	1.51253e-06	-0.354679	FUNCTION: Core subunit of the mitochondrial membrane respiratory chain NADH dehydrogenase (Complex I) that is believed to belong to the minimal assembly required for catalysis. Complex I functions in the transfer of electrons from NADH to the respiratory chain. {ECO:0000256|RuleBase:RU364066}.	SUBCELLULAR LOCATION: Mitochondrion inner membrane {ECO:0000256|RuleBase:RU364066}; Peripheral membrane protein {ECO:0000256|RuleBase:RU364066}; Matrix side {ECO:0000256|RuleBase:RU364066}.			4 iron, 4 sulfur cluster binding [GO:0051539]; FMN binding [GO:0010181]; metal ion binding [GO:0046872]; NAD binding [GO:0051287]; NADH dehydrogenase (ubiquinone) activity [GO:0008137]	cytosol [GO:0005829]; mitochondrial inner membrane [GO:0005743]; mitochondrion [GO:0005739]; respirasome [GO:0070469]	GO:0005739; GO:0005743; GO:0005829; GO:0008137; GO:0010181; GO:0046872; GO:0051287; GO:0051539; GO:0070469			19.5657	19.6522	19.6232	19.6388	19.6091	19.9714	19.9347	19.9681	19.9722	20.0159
NFIA_B1AKN6	-1.05473	-1.00065	-0.661788	-0.801133	-1.12956	1.1118	1.00436	0.855378	0.565159	1.11116	NFIA	Nuclear factor 1;Nuclear factor 1 A-type	B1AKN6	1.04056	3.39321e-08	1.51253e-06	-0.650282	FUNCTION: Recognizes and binds the palindromic sequence 5'-TTGGCNNNNNGCCAA-3' present in viral and cellular promoters and in the origin of replication of adenovirus type 2. These proteins are individually capable of activating transcription and replication. {ECO:0000256|RuleBase:RU000690}.	SUBCELLULAR LOCATION: Nucleus {ECO:0000256|RuleBase:RU000690, ECO:0000256|SAAS:SAAS00573677}.		DNA replication [GO:0006260]	DNA binding [GO:0003677]; DNA-binding transcription factor activity [GO:0003700]	nucleus [GO:0005634]	GO:0003677; GO:0003700; GO:0005634; GO:0006260			15.9902	16.0091	16.1276	16.0789	15.964	16.748	16.7104	16.6583	16.5568	16.7478
ANP32E_Q9BTT0	-1.0521	-0.787394	-1.16665	-0.8571	-0.817603	0.88754	0.978344	1.08667	0.652401	1.0759	ANP32E	Acidic leucine-rich nuclear phosphoprotein 32 family member E	Q9BTT0	1.01836	3.40964e-08	1.51253e-06	-0.371361	FUNCTION: Histone chaperone that specifically mediates the genome-wide removal of histone H2A.Z/H2AZ1 from the nucleosome: removes H2A.Z/H2AZ1 from its normal sites of deposition, especially from enhancer and insulator regions. Not involved in deposition of H2A.Z/H2AZ1 in the nucleosome. May stabilize the evicted H2A.Z/H2AZ1-H2B dimer, thus shifting the equilibrium towards dissociation and the of…	SUBCELLULAR LOCATION: Cytoplasm {ECO:0000250}. Nucleus {ECO:0000250}.		histone exchange [GO:0043486]	histone binding [GO:0042393]; phosphatase inhibitor activity [GO:0019212]	cytoplasmic vesicle [GO:0031410]; nucleus [GO:0005634]; Swr1 complex [GO:0000812]	GO:0000812; GO:0005634; GO:0019212; GO:0031410; GO:0042393; GO:0043486		hsa:81611;	20.2076	20.2601	20.1849	20.2463	20.2541	20.5923	20.6103	20.6318	20.5456	20.6296
PARVA_J3KNQ4	-1.08949	-0.897297	-0.961225	-1.00929	-0.720142	0.749868	0.952883	1.02495	0.724766	1.22497	PARVA	Alpha-parvin	J3KNQ4	1.0196	3.55673e-08	1.56046e-06	-0.380917										19.4027	19.4418	19.4288	19.419	19.4779	19.7772	19.8185	19.8332	19.772	19.8739
NME3_Q13232	-0.642364	-0.958476	-0.915153	-1.01126	-1.14474	1.08797	0.749896	1.1566	0.778165	0.899359	NME3	Nucleoside diphosphate kinase 3;Nucleoside diphosphate kinase	Q13232	1.02433	3.5724e-08	1.56046e-06	-0.404657	FUNCTION: Major role in the synthesis of nucleoside triphosphates other than ATP. The ATP gamma phosphate is transferred to the NDP beta phosphate via a ping-pong mechanism, using a phosphorylated active-site intermediate. Probably has a role in normal hematopoiesis by inhibition of granulocyte differentiation and induction of apoptosis.			apoptotic process [GO:0006915]; CTP biosynthetic process [GO:0006241]; GTP biosynthetic process [GO:0006183]; nucleobase-containing small molecule interconversion [GO:0015949]; purine nucleotide metabolic process [GO:0006163]; pyrimidine nucleotide metabolic process [GO:0006220]; UTP biosynthetic process [GO:0006228]	ATP binding [GO:0005524]; metal ion binding [GO:0046872]; nucleoside diphosphate kinase activity [GO:0004550]	cytosol [GO:0005829]	GO:0004550; GO:0005524; GO:0005829; GO:0006163; GO:0006183; GO:0006220; GO:0006228; GO:0006241; GO:0006915; GO:0015949; GO:0046872	R-HSA-499943;	hsa:4832;	16.6981	16.6296	16.639	16.6182	16.5893	17.0728	16.9996	17.0876	17.0057	17.0319
GPI_P06744	-0.831462	-0.844888	-1.12207	-0.751423	-1.12479	0.842078	0.9693	0.934529	0.715321	1.2134	GPI	Glucose-6-phosphate isomerase	P06744	1.018	3.60262e-08	1.56046e-06	-0.391542	FUNCTION: In the cytoplasm, catalyzes the conversion of glucose-6-phosphate to fructose-6-phosphate, the second step in glycolysis, and the reverse reaction during gluconeogenesis (PubMed:28803808). Besides it's role as a glycolytic enzyme, also acts as a secreted cytokine: acts as an angiogenic factor (AMF) that stimulates endothelial cell motility (PubMed:11437381). Acts as a neurotrophic facto…	SUBCELLULAR LOCATION: Cytoplasm {ECO:0000269|PubMed:11437381}. Secreted {ECO:0000269|PubMed:11437381}.	DISEASE: Hemolytic anemia, non-spherocytic, due to glucose phosphate isomerase deficiency (HA-GPID) [MIM:613470]: A form of anemia in which there is no abnormal hemoglobin or spherocytosis. It is caused by glucose phosphate isomerase deficiency. {ECO:0000269|PubMed:28803808, ECO:0000269|PubMed:7989588, ECO:0000269|PubMed:8499925, ECO:0000269|PubMed:8822952, ECO:0000269|PubMed:8822954, ECO:0000269…	canonical glycolysis [GO:0061621]; carbohydrate metabolic process [GO:0005975]; gluconeogenesis [GO:0006094]; glucose 6-phosphate metabolic process [GO:0051156]; glycolytic process [GO:0006096]; hemostasis [GO:0007599]; humoral immune response [GO:0006959]; neutrophil degranulation [GO:0043312]; positive regulation of endothelial cell migration [GO:0010595]; positive regulation of immunoglobulin …	cytokine activity [GO:0005125]; glucose-6-phosphate isomerase activity [GO:0004347]; growth factor activity [GO:0008083]; intramolecular transferase activity [GO:0016866]; monosaccharide binding [GO:0048029]; ubiquitin protein ligase binding [GO:0031625]	cytosol [GO:0005829]; extracellular exosome [GO:0070062]; extracellular region [GO:0005576]; ficolin-1-rich granule lumen [GO:1904813]; membrane [GO:0016020]; nucleoplasm [GO:0005654]; plasma membrane [GO:0005886]; secretory granule lumen [GO:0034774]	GO:0004347; GO:0005125; GO:0005576; GO:0005654; GO:0005829; GO:0005886; GO:0005975; GO:0006094; GO:0006096; GO:0006959; GO:0007599; GO:0008083; GO:0010595; GO:0016020; GO:0016866; GO:0031625; GO:0034774; GO:0043312; GO:0048029; GO:0051024; GO:0051156; GO:0061621; GO:0070062; GO:1904813	R-HSA-5628897;R-HSA-6798695;R-HSA-70171;R-HSA-70263;	hsa:2821;	21.7685	21.7657	21.7076	21.7852	21.7071	22.1189	22.1456	22.1383	22.0924	22.1967
CTSA_X6R5C5	-0.810051	-0.995808	-0.935986	-0.683408	-1.24875	0.820539	1.05439	1.1209	0.847302	0.83087	CTSA	Carboxypeptidase;Lysosomal protective protein;Lysosomal protective protein 32 kDa chain;Lysosomal protective protein 20 kDa chain	X6R5C5	1.02106	3.60509e-08	1.56046e-06	-0.394279					serine-type carboxypeptidase activity [GO:0004185]	intracellular membrane-bounded organelle [GO:0043231]	GO:0004185; GO:0043231			18.7477	18.7085	18.7211	18.7744	18.6551	19.0915	19.1408	19.1549	19.0972	19.0937
MRPL49_Q13405	-1.08268	-1.08784	-0.783709	-0.720216	-0.999844	0.808485	0.895133	0.811577	0.89603	1.26307	MRPL49	39S ribosomal protein L49, mitochondrial	Q13405	1.02133	3.66627e-08	1.57738e-06	-0.391253		SUBCELLULAR LOCATION: Mitochondrion {ECO:0000269|PubMed:25278503, ECO:0000269|PubMed:25838379, ECO:0000269|PubMed:28892042}.		mitochondrial translational elongation [GO:0070125]; mitochondrial translational termination [GO:0070126]	structural constituent of ribosome [GO:0003735]	mitochondrial inner membrane [GO:0005743]; mitochondrial large ribosomal subunit [GO:0005762]; mitochondrial ribosome [GO:0005761]; mitochondrion [GO:0005739]	GO:0003735; GO:0005739; GO:0005743; GO:0005761; GO:0005762; GO:0070125; GO:0070126	R-HSA-5368286;R-HSA-5389840;R-HSA-5419276;	hsa:740;	18.3123	18.3112	18.3748	18.3881	18.3296	18.708	18.7261	18.7086	18.7263	18.8031
NAMPT_P43490	-1.00249	-0.703917	-0.967347	-1.18024	-0.812705	0.854895	0.877277	0.894651	0.766109	1.27377	NAMPT	Nicotinamide phosphoribosyltransferase	P43490	1.02018	3.76015e-08	1.60808e-06	-0.426354	FUNCTION: Catalyzes the condensation of nicotinamide with 5-phosphoribosyl-1-pyrophosphate to yield nicotinamide mononucleotide, an intermediate in the biosynthesis of NAD. It is the rate limiting component in the mammalian NAD biosynthesis pathway. The secreted form behaves both as a cytokine with immunomodulating properties and an adipokine with anti-diabetic properties, it has no enzymatic act…	SUBCELLULAR LOCATION: Nucleus {ECO:0000269|PubMed:24130902}. Cytoplasm {ECO:0000250|UniProtKB:Q99KQ4}. Secreted {ECO:0000269|PubMed:21741723}. Note=Under non-inflammatory conditions, visfatin predominantly exhibits a granular pattern within the nucleus. Secreted by endothelial cells upon IL-1beta stimulation. Abundantly secreted in milk, reaching 100-fold higher concentrations compared to materna…		aging [GO:0007568]; cell-cell signaling [GO:0007267]; cellular response to amyloid-beta [GO:1904646]; cellular response to ionizing radiation [GO:0071479]; cellular response to oxygen-glucose deprivation [GO:0090650]; circadian regulation of gene expression [GO:0032922]; circadian rhythm [GO:0007623]; female pregnancy [GO:0007565]; microglial cell activation [GO:0001774]; NAD biosynthesis via nic…	cytokine activity [GO:0005125]; drug binding [GO:0008144]; identical protein binding [GO:0042802]; nicotinamide phosphoribosyltransferase activity [GO:0047280]; nicotinate-nucleotide diphosphorylase (carboxylating) activity [GO:0004514]; protein homodimerization activity [GO:0042803]	cell junction [GO:0030054]; cytosol [GO:0005829]; extracellular exosome [GO:0070062]; nuclear speck [GO:0016607]; plasma membrane [GO:0005886]	GO:0001774; GO:0004514; GO:0005125; GO:0005829; GO:0005886; GO:0007165; GO:0007267; GO:0007565; GO:0007568; GO:0007623; GO:0008144; GO:0008284; GO:0010507; GO:0014070; GO:0014916; GO:0016607; GO:0030054; GO:0032922; GO:0034356; GO:0042802; GO:0042803; GO:0045944; GO:0047280; GO:0048661; GO:0051770; GO:0070062; GO:0070997; GO:0071479; GO:0090650; GO:1904646; GO:1905377; GO:2000773	R-HSA-1368108;R-HSA-197264;	hsa:10135;	21.1083	21.1765	21.1163	21.0677	21.1516	21.5325	21.5376	21.5416	21.5122	21.6282
TMX1_Q9H3N1	-1.17782	-0.789003	-1.02469	-0.74882	-0.952962	0.899633	0.807651	1.07094	0.836999	1.07807	TMX1	Thioredoxin-related transmembrane protein 1	Q9H3N1	1.01602	3.82064e-08	1.61606e-06	-0.325474	FUNCTION: May participate in various redox reactions through the reversible oxidation of its active center dithiol to a disulfide and catalyze dithiol-disulfide exchange reactions.	SUBCELLULAR LOCATION: Membrane {ECO:0000305}; Single-pass type I membrane protein {ECO:0000305}. Endoplasmic reticulum membrane {ECO:0000305}; Single-pass type I membrane protein {ECO:0000305}. Note=Predominantly found in the endoplasmic reticulum. {ECO:0000269|PubMed:11152479}.		cell redox homeostasis [GO:0045454]; response to endoplasmic reticulum stress [GO:0034976]	disulfide oxidoreductase activity [GO:0015036]	cell [GO:0005623]; endoplasmic reticulum membrane [GO:0005789]; integral component of membrane [GO:0016021]	GO:0005623; GO:0005789; GO:0015036; GO:0016021; GO:0034976; GO:0045454		hsa:81542;	20.2715	20.3389	20.298	20.3459	20.3105	20.6317	20.6157	20.6614	20.6208	20.6626
APOA5_C9JZZ0	-0.908531	-1.09137	-0.6607	-0.809051	-1.16938	0.995484	0.87266	0.725678	0.744775	1.30043	APOA5	Apolipoprotein A-V	C9JZZ0	1.04537	3.82405e-08	1.61606e-06	-0.832458		SUBCELLULAR LOCATION: Secreted {ECO:0000256|SAAS:SAAS00143437}.		lipid transport [GO:0006869]; lipoprotein metabolic process [GO:0042157]	lipid binding [GO:0008289]	extracellular region [GO:0005576]	GO:0005576; GO:0006869; GO:0008289; GO:0042157			18.3568	18.2748	18.468	18.4014	18.2398	19.211	19.1559	19.0899	19.0985	19.3478
TTC19_Q6DKK2	-0.919681	-0.777171	-0.803013	-1.03837	-1.12423	0.644827	0.792578	1.21618	1.1103	0.898571	TTC19	Tetratricopeptide repeat protein 19, mitochondrial	Q6DKK2	1.02571	3.91507e-08	1.64479e-06	-0.446747	FUNCTION: Required for the preservation of the structural and functional integrity of mitochondrial respiratory complex III by allowing the physiological turnover of the Rieske protein UQCRFS1 (PubMed:21278747, PubMed:28673544). Involved in the clearance of UQCRFS1 N-terminal fragments, which are produced upon incorporation of UQCRFS1 into the complex III and whose presence is detrimental for its…	SUBCELLULAR LOCATION: Mitochondrion inner membrane {ECO:0000269|PubMed:21278747}.	DISEASE: Mitochondrial complex III deficiency, nuclear 2 (MC3DN2) [MIM:615157]: A disorder of the mitochondrial respiratory chain resulting in a highly variable phenotype depending on which tissues are affected. Clinical features include mitochondrial encephalopathy, psychomotor retardation, ataxia, severe failure to thrive, liver dysfunction, renal tubulopathy, muscle weakness and exercise intol…	mitochondrial respiratory chain complex III assembly [GO:0034551]; mitotic cytokinesis [GO:0000281]; oxidation-reduction process [GO:0055114]		centrosome [GO:0005813]; midbody [GO:0030496]; mitochondrial inner membrane [GO:0005743]; mitochondrion [GO:0005739]; respirasome [GO:0070469]	GO:0000281; GO:0005739; GO:0005743; GO:0005813; GO:0030496; GO:0034551; GO:0055114; GO:0070469		hsa:54902;	17.381	17.4151	17.4089	17.3526	17.332	17.7558	17.7911	17.8926	17.8673	17.8165
IRF3_M0R0X9	-1.08065	-1.20285	-1.0068	-0.625218	-0.724263	0.963634	0.807734	0.887766	0.739697	1.24095	IRF3	Interferon regulatory factor 3	M0R0X9	1.0545	3.95246e-08	1.65079e-06	-0.774543					DNA-binding transcription factor activity [GO:0003700]; transcription regulatory region DNA binding [GO:0044212]		GO:0003700; GO:0044212			14.1481	14.0971	14.179	14.3382	14.2969	15.0013	14.9362	14.9696	14.9078	15.117
PRDX3_P30048	-1.12009	-0.680285	-1.13268	-0.892062	-0.844376	0.72031	0.839486	1.05539	0.879895	1.17442	PRDX3	Thioredoxin-dependent peroxide reductase, mitochondrial	P30048	1.01958	4.04731e-08	1.67847e-06	-0.402878	FUNCTION: Thiol-specific peroxidase that catalyzes the reduction of hydrogen peroxide and organic hydroperoxides to water and alcohols, respectively. Plays a role in cell protection against oxidative stress by detoxifying peroxides (PubMed:7733872, PubMed:17707404). Acts synergistically with MAP3K13 to regulate the activation of NF-kappa-B in the cytosol (PubMed:12492477). {ECO:0000269|PubMed:124…	SUBCELLULAR LOCATION: Mitochondrion {ECO:0000250|UniProtKB:P35705}. Cytoplasm {ECO:0000305|PubMed:12492477}. Early endosome {ECO:0000269|PubMed:15750338}. Note=Localizes to early endosomes in a RPS6KC1-dependent manner. {ECO:0000269|PubMed:15750338}.		cell redox homeostasis [GO:0045454]; cellular response to oxidative stress [GO:0034599]; cellular response to reactive oxygen species [GO:0034614]; hydrogen peroxide catabolic process [GO:0042744]; maternal placenta development [GO:0001893]; mitochondrion organization [GO:0007005]; myeloid cell differentiation [GO:0030099]; negative regulation of apoptotic process [GO:0043066]; negative regulatio…	alkyl hydroperoxide reductase activity [GO:0008785]; cysteine-type endopeptidase inhibitor activity involved in apoptotic process [GO:0043027]; identical protein binding [GO:0042802]; kinase binding [GO:0019900]; protein C-terminus binding [GO:0008022]; protein kinase binding [GO:0019901]; thioredoxin peroxidase activity [GO:0008379]	cell [GO:0005623]; cytoplasm [GO:0005737]; cytosol [GO:0005829]; early endosome [GO:0005769]; mitochondrial matrix [GO:0005759]; mitochondrion [GO:0005739]; protein-containing complex [GO:0032991]	GO:0001893; GO:0005623; GO:0005737; GO:0005739; GO:0005759; GO:0005769; GO:0005829; GO:0006979; GO:0007005; GO:0008022; GO:0008284; GO:0008379; GO:0008785; GO:0018171; GO:0019900; GO:0019901; GO:0030099; GO:0032496; GO:0032991; GO:0033673; GO:0034599; GO:0034614; GO:0042542; GO:0042744; GO:0042802; GO:0043027; GO:0043066; GO:0045454; GO:0051092; GO:0051881	R-HSA-3299685;	hsa:10935;	20.5333	20.6281	20.5306	20.5825	20.5927	20.9302	20.9559	21.0025	20.9647	21.0282
KANSL2_H0YIQ8	-0.644039	-0.995093	-0.905956	-0.777614	-1.33088	1.01478	1.00662	0.73164	0.866739	1.0338	KANSL2	KAT8 regulatory NSL complex subunit 2	H0YIQ8	1.03227	4.06575e-08	1.67847e-06	-0.511444						histone acetyltransferase complex [GO:0000123]	GO:0000123			15.9264	15.83	15.8545	15.8897	15.7377	16.3822	16.38	16.3044	16.3415	16.3874
FYN_P06241	-0.916228	-0.893134	-1.06746	-0.696663	-1.05841	0.870779	0.781601	0.691986	0.86683	1.4207	FYN	Tyrosine-protein kinase Fyn	P06241	1.08314	4.16128e-08	1.70804e-06	-1.23272	FUNCTION: Non-receptor tyrosine-protein kinase that plays a role in many biological processes including regulation of cell growth and survival, cell adhesion, integrin-mediated signaling, cytoskeletal remodeling, cell motility, immune response and axon guidance. Inactive FYN is phosphorylated on its C-terminal tail within the catalytic domain. Following activation by PKA, the protein subsequently…	SUBCELLULAR LOCATION: Cytoplasm. Nucleus. Cell membrane. Note=Present and active in lipid rafts. Palmitoylation is crucial for proper trafficking.		activated T cell proliferation [GO:0050798]; adaptive immune response [GO:0002250]; axon guidance [GO:0007411]; blood coagulation [GO:0007596]; calcium ion transport [GO:0006816]; cell differentiation [GO:0030154]; cellular response to amyloid-beta [GO:1904646]; cellular response to glycine [GO:1905430]; cellular response to L-glutamate [GO:1905232]; cellular response to peptide hormone stimulus …	alpha-tubulin binding [GO:0043014]; ATP binding [GO:0005524]; CD4 receptor binding [GO:0042609]; CD8 receptor binding [GO:0042610]; disordered domain specific binding [GO:0097718]; enzyme binding [GO:0019899]; ephrin receptor binding [GO:0046875]; growth factor receptor binding [GO:0070851]; identical protein binding [GO:0042802]; ion channel binding [GO:0044325]; metal ion binding [GO:0046872]; …	actin filament [GO:0005884]; cell body [GO:0044297]; cytosol [GO:0005829]; dendrite [GO:0030425]; endosome [GO:0005768]; extrinsic component of cytoplasmic side of plasma membrane [GO:0031234]; glial cell projection [GO:0097386]; glutamatergic synapse [GO:0098978]; membrane raft [GO:0045121]; mitochondrion [GO:0005739]; nucleus [GO:0005634]; perinuclear endoplasmic reticulum [GO:0097038]; perinuc…	GO:0000165; GO:0000304; GO:0001764; GO:0002223; GO:0002250; GO:0003015; GO:0004713; GO:0004715; GO:0005102; GO:0005524; GO:0005634; GO:0005739; GO:0005768; GO:0005829; GO:0005884; GO:0005886; GO:0006468; GO:0006816; GO:0007169; GO:0007411; GO:0007596; GO:0007612; GO:0007631; GO:0008360; GO:0010629; GO:0010730; GO:0010976; GO:0014068; GO:0014069; GO:0018108; GO:0019221; GO:0019899; GO:0030154; GO:…	R-HSA-114604;R-HSA-1227986;R-HSA-1257604;R-HSA-1433557;R-HSA-1433559;R-HSA-164944;R-HSA-202733;R-HSA-2029481;R-HSA-210990;R-HSA-2219530;R-HSA-2424491;R-HSA-2682334;R-HSA-2730905;R-HSA-373753;R-HSA-375165;R-HSA-389356;R-HSA-389357;R-HSA-389359;R-HSA-389513;R-HSA-3928662;R-HSA-3928663;R-HSA-3928664;R-HSA-3928665;R-HSA-399954;R-HSA-399955;R-HSA-399956;R-HSA-418885 [P06241-1];R-HSA-4420097;R-HSA-5621…	hsa:2534;	14.8334	14.8487	14.7327	14.9795	14.7388	16.0223	15.963	15.9034	16.0197	16.3882
MAN2A2_H0YLB9	-1.25214	-1.21664	-0.714765	-0.692934	-0.770907	0.951936	0.80541	1.08517	0.954013	0.850862	MAN2A2	Alpha-mannosidase;Alpha-mannosidase 2x	H0YLB9	1.0368	4.19695e-08	1.71284e-06	-0.576307				mannose metabolic process [GO:0006013]	alpha-mannosidase activity [GO:0004559]; carbohydrate binding [GO:0030246]; metal ion binding [GO:0046872]		GO:0004559; GO:0006013; GO:0030246; GO:0046872			15.5587	15.5697	15.7252	15.732	15.7078	16.242	16.1965	16.2833	16.2426	16.2106
ALDOC_P09972	-1.11491	-0.59894	-0.833552	-1.04118	-1.08148	0.742681	0.919664	0.947451	0.902786	1.15748	ALDOC	Fructose-bisphosphate aldolase C;Fructose-bisphosphate aldolase	P09972	1.01933	4.30569e-08	1.7191e-06	-0.39356				canonical glycolysis [GO:0061621]; epithelial cell differentiation [GO:0030855]; fructose 1,6-bisphosphate metabolic process [GO:0030388]; fructose metabolic process [GO:0006000]; gluconeogenesis [GO:0006094]; glycolytic process [GO:0006096]; neutrophil degranulation [GO:0043312]	cytoskeletal protein binding [GO:0008092]; fructose-bisphosphate aldolase activity [GO:0004332]	cytoskeleton [GO:0005856]; cytosol [GO:0005829]; extracellular exosome [GO:0070062]; extracellular region [GO:0005576]; ficolin-1-rich granule lumen [GO:1904813]; secretory granule lumen [GO:0034774]; tertiary granule lumen [GO:1904724]	GO:0004332; GO:0005576; GO:0005829; GO:0005856; GO:0006000; GO:0006094; GO:0006096; GO:0008092; GO:0030388; GO:0030855; GO:0034774; GO:0043312; GO:0061621; GO:0070062; GO:1904724; GO:1904813	R-HSA-6798695;R-HSA-70171;R-HSA-70263;	hsa:230;	20.3229	20.4316	20.3821	20.3384	20.3299	20.7142	20.7515	20.7574	20.7479	20.8016
ORC5_O43913	-0.800419	-1.07039	-1.0409	-0.673918	-1.06422	0.828078	0.839652	1.01239	0.678429	1.2913	ORC5	Origin recognition complex subunit 5	O43913	1.03026	4.31726e-08	1.7191e-06	-0.536466	FUNCTION: Component of the origin recognition complex (ORC) that binds origins of replication. DNA-binding is ATP-dependent. The specific DNA sequences that define origins of replication have not been identified yet. ORC is required to assemble the pre-replication complex necessary to initiate DNA replication. {ECO:0000269|PubMed:31160578}.	SUBCELLULAR LOCATION: Nucleus {ECO:0000269|PubMed:31160578}. Chlorosome {ECO:0000269|PubMed:31160578}.		DNA replication [GO:0006260]; DNA replication initiation [GO:0006270]; G1/S transition of mitotic cell cycle [GO:0000082]; regulation of DNA replication [GO:0006275]	ATP binding [GO:0005524]; DNA replication origin binding [GO:0003688]; nucleotide binding [GO:0000166]	chromatin [GO:0000785]; cytosol [GO:0005829]; nuclear chromosome, telomeric region [GO:0000784]; nuclear origin of replication recognition complex [GO:0005664]; nucleoplasm [GO:0005654]; nucleus [GO:0005634]; origin recognition complex [GO:0000808]	GO:0000082; GO:0000166; GO:0000784; GO:0000785; GO:0000808; GO:0003688; GO:0005524; GO:0005634; GO:0005654; GO:0005664; GO:0005829; GO:0006260; GO:0006270; GO:0006275	R-HSA-113507;R-HSA-176187;R-HSA-68616;R-HSA-68689;R-HSA-68827;R-HSA-68867;R-HSA-68949;R-HSA-68962;	hsa:5001;	17.7673	17.6894	17.6979	17.8037	17.6912	18.237	18.2403	18.2901	18.1938	18.3706
LRRC59_Q96AG4	0.833348	0.916612	0.929527	1.02538	0.941333	-0.55298	-0.816588	-0.915838	-0.999046	-1.36175	LRRC59	Leucine-rich repeat-containing protein 59	Q96AG4	1.027	4.34574e-08	1.7191e-06	0.581895	FUNCTION: Required for nuclear import of FGF1, but not that of FGF2. Might regulate nuclear import of exogenous FGF1 by facilitating interaction with the nuclear import machinery and by transporting cytosolic FGF1 to, and possibly through, the nuclear pores. {ECO:0000269|PubMed:22321063}.	SUBCELLULAR LOCATION: Microsome membrane {ECO:0000250}; Single-pass type II membrane protein {ECO:0000250}. Endoplasmic reticulum membrane; Single-pass type II membrane protein. Nucleus envelope. Note=Localization in the nuclear envelope depends upon the nuclear import machinery, including KPNB1.			cadherin binding [GO:0045296]; RNA binding [GO:0003723]	endoplasmic reticulum [GO:0005783]; endoplasmic reticulum membrane [GO:0005789]; integral component of membrane [GO:0016021]; membrane [GO:0016020]; mitochondrial nucleoid [GO:0042645]; nuclear envelope [GO:0005635]	GO:0003723; GO:0005635; GO:0005783; GO:0005789; GO:0016020; GO:0016021; GO:0042645; GO:0045296		hsa:55379;	22.1023	22.1284	22.1325	22.1625	22.1362	21.6683	21.5857	21.5547	21.5286	21.4151
RABGAP1L_E9PS63	-0.796269	-0.637591	-0.972252	-1.18685	-1.04933	0.949607	0.684286	1.28067	0.893755	0.833984	RABGAP1L	Rab GTPase-activating protein 1-like, isoform 10	E9PS63	1.03569	4.34693e-08	1.7191e-06	-0.649459										18.2415	18.297	18.1799	18.1049	18.153	18.8521	18.7593	18.9679	18.8326	18.8117
YBX1_P67809	-0.948865	-0.98394	-1.13703	-0.510626	-1.07018	0.855899	0.921697	0.934244	0.74772	1.19108	YBX1	Nuclease-sensitive element-binding protein 1	P67809	1.0255	4.40936e-08	1.7191e-06	-0.522312	FUNCTION: DNA- and RNA-binding protein involved in various processes, such as translational repression, RNA stabilization, mRNA splicing, DNA repair and transcription regulation (PubMed:8188694, PubMed:10817758, PubMed:11698476, PubMed:14718551, PubMed:18809583, PubMed:31358969). Predominantly acts as a RNA-binding protein: binds preferentially to the 5'-[CU]CUGCG-3' RNA motif and specifically re…	SUBCELLULAR LOCATION: Cytoplasm {ECO:0000269|PubMed:12604611, ECO:0000269|PubMed:14718551, ECO:0000269|PubMed:15806160}. Nucleus {ECO:0000269|PubMed:12604611, ECO:0000269|PubMed:14718551, ECO:0000269|PubMed:15806160}. Cytoplasmic granule {ECO:0000269|PubMed:17289661, ECO:0000269|PubMed:18335541, ECO:0000269|PubMed:19029303, ECO:0000269|PubMed:25229427}. Secreted {ECO:0000269|PubMed:19483673}. Sec…		cellular response to interleukin-7 [GO:0098761]; CRD-mediated mRNA stabilization [GO:0070934]; in utero embryonic development [GO:0001701]; mRNA splicing, via spliceosome [GO:0000398]; negative regulation of striated muscle cell differentiation [GO:0051154]; negative regulation of transcription by RNA polymerase II [GO:0000122]; Notch signaling pathway [GO:0007219]; positive regulation of cell di…	chromatin binding [GO:0003682]; DNA binding [GO:0003677]; DNA-binding transcription activator activity, RNA polymerase II-specific [GO:0001228]; DNA-binding transcription factor activity [GO:0003700]; DNA-binding transcription factor activity, RNA polymerase II-specific [GO:0000981]; double-stranded DNA binding [GO:0003690]; GTPase binding [GO:0051020]; RNA binding [GO:0003723]; RNA polymerase II…	CRD-mediated mRNA stability complex [GO:0070937]; cytoplasm [GO:0005737]; cytoplasmic stress granule [GO:0010494]; cytosol [GO:0005829]; extracellular exosome [GO:0070062]; extracellular region [GO:0005576]; histone pre-mRNA 3'end processing complex [GO:0071204]; intracellular membrane-bounded organelle [GO:0043231]; nuclear membrane [GO:0031965]; nucleoplasm [GO:0005654]; nucleus [GO:0005634]; r…	GO:0000122; GO:0000398; GO:0000978; GO:0000981; GO:0001228; GO:0001701; GO:0003677; GO:0003682; GO:0003690; GO:0003697; GO:0003700; GO:0003723; GO:0005576; GO:0005634; GO:0005654; GO:0005689; GO:0005737; GO:0005829; GO:0006355; GO:0006366; GO:0007219; GO:0010494; GO:0031965; GO:0043231; GO:0045944; GO:0051020; GO:0051154; GO:0051781; GO:0070062; GO:0070934; GO:0070937; GO:0071204; GO:0098761; GO:…	R-HSA-72163;R-HSA-72165;R-HSA-9017802;	hsa:4904;	20.4797	20.4699	20.4269	20.6028	20.4457	20.9865	21.0049	21.0085	20.9561	21.0806
ARPC2_O15144	-0.988942	-0.937578	-0.994077	-0.83442	-0.907639	0.886735	0.808718	0.825675	0.739445	1.40209	ARPC2	Actin-related protein 2/3 complex subunit 2	O15144	1.02054	4.43714e-08	1.7191e-06	-0.427577	FUNCTION: Actin-binding component of the Arp2/3 complex, a multiprotein complex that mediates actin polymerization upon stimulation by nucleation-promoting factor (NPF) (PubMed:9230079). The Arp2/3 complex mediates the formation of branched actin networks in the cytoplasm, providing the force for cell motility (PubMed:9230079). Seems to contact the mother actin filament (PubMed:9230079). In addit…	SUBCELLULAR LOCATION: Cytoplasm, cytoskeleton {ECO:0000269|PubMed:9230079}. Cell projection {ECO:0000269|PubMed:9230079}. Cell junction, synapse, synaptosome {ECO:0000250|UniProtKB:Q9CVB6}. Nucleus {ECO:0000269|PubMed:29925947}.		actin filament polymerization [GO:0030041]; actin polymerization-dependent cell motility [GO:0070358]; Arp2/3 complex-mediated actin nucleation [GO:0034314]; ephrin receptor signaling pathway [GO:0048013]; Fc-gamma receptor signaling pathway involved in phagocytosis [GO:0038096]; membrane organization [GO:0061024]; positive regulation of lamellipodium assembly [GO:0010592]; positive regulation of…	actin filament binding [GO:0051015]; structural constituent of cytoskeleton [GO:0005200]	actin cytoskeleton [GO:0015629]; Arp2/3 protein complex [GO:0005885]; cytosol [GO:0005829]; endosome [GO:0005768]; extracellular exosome [GO:0070062]; focal adhesion [GO:0005925]; glutamatergic synapse [GO:0098978]; lamellipodium [GO:0030027]; muscle cell projection membrane [GO:0036195]; neuron projection [GO:0043005]; nucleus [GO:0005634]; site of double-strand break [GO:0035861]	GO:0005200; GO:0005634; GO:0005768; GO:0005829; GO:0005885; GO:0005925; GO:0010592; GO:0015629; GO:0030027; GO:0030041; GO:0034314; GO:0035861; GO:0036195; GO:0038096; GO:0043005; GO:0048013; GO:0051015; GO:0061024; GO:0070062; GO:0070358; GO:0098978; GO:1900026	R-HSA-2029482;R-HSA-3928662;R-HSA-5663213;R-HSA-8856828;	hsa:10109;	20.8033	20.8151	20.8021	20.8387	20.822	21.2333	21.2154	21.2193	21.1996	21.3515
EDIL3_O43854	-0.91034	-0.863575	-1.0019	-0.980951	-0.922962	0.71548	0.787809	0.787175	1.17117	1.2181	EDIL3	EGF-like repeat and discoidin I-like domain-containing protein 3	O43854	1.0174	4.46174e-08	1.7191e-06	-0.353612	FUNCTION: Promotes adhesion of endothelial cells through interaction with the alpha-v/beta-3 integrin receptor. Inhibits formation of vascular-like structures. May be involved in regulation of vascular morphogenesis of remodeling in embryonic development.	SUBCELLULAR LOCATION: Secreted.		cell adhesion [GO:0007155]; multicellular organism development [GO:0007275]; positive regulation of cell-substrate adhesion [GO:0010811]	calcium ion binding [GO:0005509]; integrin binding [GO:0005178]	collagen-containing extracellular matrix [GO:0062023]; extracellular exosome [GO:0070062]; extracellular vesicle [GO:1903561]	GO:0005178; GO:0005509; GO:0007155; GO:0007275; GO:0010811; GO:0062023; GO:0070062; GO:1903561		hsa:10085;	20.3261	20.335	20.3088	20.3128	20.3238	20.6333	20.6469	20.6468	20.7193	20.7282
MYO1D_K7EIG7	-0.880269	-0.967825	-1.14672	-0.863565	-0.793709	0.749388	0.777795	0.861831	0.878859	1.38422	MYO1D	Unconventional myosin-Id	K7EIG7	1.02741	4.48252e-08	1.7191e-06	-0.50388					actin binding [GO:0003779]; ATP binding [GO:0005524]; motor activity [GO:0003774]	myosin complex [GO:0016459]	GO:0003774; GO:0003779; GO:0005524; GO:0016459			18.3952	18.3715	18.3231	18.3997	18.4186	18.8365	18.8442	18.8669	18.8715	19.0084
RHOF_Q9HBH0	-0.886859	-0.891648	-0.953553	-0.892671	-1.03699	0.69276	0.776595	1.17763	0.745104	1.26963	RHOF	Rho-related GTP-binding protein RhoF	Q9HBH0	1.02343	4.4833e-08	1.7191e-06	-0.431638	FUNCTION: Plasma membrane-associated small GTPase which cycles between an active GTP-bound and an inactive GDP-bound state. Causes the formation of thin, actin-rich surface projections called filopodia. Functions cooperatively with CDC42 and Rac to generate additional structures, increasing the diversity of actin-based morphology.	SUBCELLULAR LOCATION: Cell membrane {ECO:0000305}; Lipid-anchor {ECO:0000305}; Cytoplasmic side {ECO:0000305}. Cytoplasm, cytoskeleton.		actin filament bundle assembly [GO:0051017]; actin filament organization [GO:0007015]; cell migration [GO:0016477]; establishment or maintenance of actin cytoskeleton polarity [GO:0030950]; neutrophil degranulation [GO:0043312]; regulation of actin cytoskeleton organization [GO:0032956]; regulation of cell migration [GO:0030334]; regulation of cell shape [GO:0008360]; regulation of small GTPase m…	GTPase activity [GO:0003924]; GTP binding [GO:0005525]; protein kinase binding [GO:0019901]	cell cortex [GO:0005938]; cell division site [GO:0032153]; cytoplasm [GO:0005737]; cytoskeleton [GO:0005856]; cytosol [GO:0005829]; extracellular exosome [GO:0070062]; intracellular membrane-bounded organelle [GO:0043231]; plasma membrane [GO:0005886]; secretory granule membrane [GO:0030667]	GO:0003924; GO:0005525; GO:0005737; GO:0005829; GO:0005856; GO:0005886; GO:0005938; GO:0007015; GO:0007266; GO:0008360; GO:0016477; GO:0019901; GO:0030334; GO:0030667; GO:0030950; GO:0032153; GO:0032956; GO:0043231; GO:0043312; GO:0051017; GO:0051056; GO:0070062	R-HSA-194840;R-HSA-6798695;	hsa:54509;	18.4368	18.4357	18.4213	18.4354	18.402	18.8024	18.8218	18.9147	18.8145	18.936
GRWD1_Q9BQ67	0.851276	1.12989	1.07771	0.662515	0.94256	-0.714733	-0.883626	-0.987763	-0.834126	-1.2437	GRWD1	Glutamate-rich WD repeat-containing protein 1	Q9BQ67	1.02146	4.48646e-08	1.7191e-06	0.418885	FUNCTION: Histone binding-protein that regulates chromatin dynamics and minichromosome maintenance (MCM) loading at replication origins, possibly by promoting chromatin openness (PubMed:25990725). {ECO:0000269|PubMed:25990725}.	SUBCELLULAR LOCATION: Nucleus, nucleolus {ECO:0000269|PubMed:12429849}. Nucleus {ECO:0000269|PubMed:25990725}. Chromosome {ECO:0000269|PubMed:25990725}. Note=Present in the nucleus throughout interphase and is detached from chromatin at the onset of mitosis and rebinds at telophase when the pre-replication complexes (pre-RC) is formed (PubMed:25990725). {ECO:0000269|PubMed:25990725}.		DNA replication [GO:0006260]; nucleosome assembly [GO:0006334]; nucleosome disassembly [GO:0006337]	chromatin binding [GO:0003682]; DNA replication origin binding [GO:0003688]; histone binding [GO:0042393]; RNA binding [GO:0003723]	chromosome [GO:0005694]; cytosol [GO:0005829]; nucleolus [GO:0005730]; nucleoplasm [GO:0005654]; nucleus [GO:0005634]; protein-containing complex [GO:0032991]	GO:0003682; GO:0003688; GO:0003723; GO:0005634; GO:0005654; GO:0005694; GO:0005730; GO:0005829; GO:0006260; GO:0006334; GO:0006337; GO:0032991; GO:0042393		hsa:83743;	19.9202	19.9828	19.9711	19.8779	19.9407	19.5686	19.5307	19.5073	19.5418	19.4498
S100A4_P26447	1.03856	0.658238	0.937165	1.37277	0.62407	-0.854084	-0.983333	-0.83719	-0.865818	-1.09038	S100A4	Protein S100-A4	P26447	1.06989	4.49962e-08	1.7191e-06	1.14395				epithelial to mesenchymal transition [GO:0001837]; positive regulation of I-kappaB kinase/NF-kappaB signaling [GO:0043123]	actin binding [GO:0003779]; calcium-dependent protein binding [GO:0048306]; calcium ion binding [GO:0005509]; identical protein binding [GO:0042802]; RAGE receptor binding [GO:0050786]; RNA binding [GO:0003723]; transition metal ion binding [GO:0046914]	collagen-containing extracellular matrix [GO:0062023]; extracellular exosome [GO:0070062]; extracellular region [GO:0005576]; extracellular space [GO:0005615]; neuron projection [GO:0043005]; nucleus [GO:0005634]; perinuclear region of cytoplasm [GO:0048471]	GO:0001837; GO:0003723; GO:0003779; GO:0005509; GO:0005576; GO:0005615; GO:0005634; GO:0042802; GO:0043005; GO:0043123; GO:0046914; GO:0048306; GO:0048471; GO:0050786; GO:0062023; GO:0070062		hsa:6275;	17.5807	17.3458	17.5181	17.7871	17.3247	16.4119	16.332	16.4223	16.4046	16.2659
DCUN1D5_Q9BTE7	-1.0168	-0.880041	-0.883252	-0.848413	-1.02092	0.703766	0.769857	0.855625	0.897614	1.42256	DCUN1D5	DCN1-like protein 5;DCN1-like protein	Q9BTE7	1.02806	4.50115e-08	1.7191e-06	-0.530336				positive regulation of ubiquitin-protein transferase activity [GO:0051443]; protein neddylation [GO:0045116]	cullin family protein binding [GO:0097602]; ubiquitin conjugating enzyme binding [GO:0031624]; ubiquitin-like protein binding [GO:0032182]	ubiquitin ligase complex [GO:0000151]	GO:0000151; GO:0031624; GO:0032182; GO:0045116; GO:0051443; GO:0097602	R-HSA-8951664;	hsa:84259;	18.8733	18.9123	18.9114	18.9213	18.8721	19.3639	19.3828	19.4072	19.4192	19.5689
APLP2_Q06481	-0.834234	-0.928791	-0.748212	-1.15508	-1.03377	1.10684	0.820745	0.856727	1.03172	0.884051	APLP2	Amyloid-like protein 2	Q06481	1.01427	4.5342e-08	1.72251e-06	-0.301387	FUNCTION: May play a role in the regulation of hemostasis. The soluble form may have inhibitory properties towards coagulation factors. May interact with cellular G-protein signaling pathways. May bind to the DNA 5'-GTCACATG-3'(CDEI box). Inhibits trypsin, chymotrypsin, plasmin, factor XIA and plasma and glandular kallikrein. Modulates the Cu/Zn nitric oxide-catalyzed autodegradation of GPC1 hepa…	SUBCELLULAR LOCATION: Cell membrane {ECO:0000305}; Single-pass type I membrane protein {ECO:0000305}. Nucleus {ECO:0000305}.		cellular protein metabolic process [GO:0044267]; G protein-coupled receptor signaling pathway [GO:0007186]; platelet degranulation [GO:0002576]; post-translational protein modification [GO:0043687]	DNA binding [GO:0003677]; heparin binding [GO:0008201]; identical protein binding [GO:0042802]; serine-type endopeptidase inhibitor activity [GO:0004867]; transition metal ion binding [GO:0046914]	endoplasmic reticulum lumen [GO:0005788]; extracellular exosome [GO:0070062]; integral component of membrane [GO:0016021]; membrane [GO:0016020]; nucleus [GO:0005634]; plasma membrane [GO:0005886]; platelet alpha granule membrane [GO:0031092]	GO:0002576; GO:0003677; GO:0004867; GO:0005634; GO:0005788; GO:0005886; GO:0007186; GO:0008201; GO:0016020; GO:0016021; GO:0031092; GO:0042802; GO:0043687; GO:0044267; GO:0046914; GO:0070062	R-HSA-114608;R-HSA-381426;R-HSA-8957275;	hsa:334;	21.1394	21.1243	21.1532	21.088	21.1074	21.4506	21.4047	21.4105	21.4386	21.4149
LMBRD2_Q68DH5	-0.803708	-0.841841	-1.00359	-0.669114	-1.33567	0.896029	0.857124	1.06873	0.760268	1.07178	LMBRD2	LMBR1 domain-containing protein 2	Q68DH5	1.02822	4.67182e-08	1.7654e-06	-0.479101	FUNCTION: Recruited to ligand-activated beta-2 adrenergic receptor/ADRB2, it negatively regulates the adrenergic receptor signaling pathway (PubMed:28388415). May also regulate other G-protein coupled receptors including type-1 angiotensin II receptor/AGTR1 (Probable). {ECO:0000269|PubMed:28388415, ECO:0000305|PubMed:28388415}.	SUBCELLULAR LOCATION: Cell membrane {ECO:0000305|PubMed:28388415}; Multi-pass membrane protein {ECO:0000255}.		adrenergic receptor signaling pathway [GO:0071875]		integral component of membrane [GO:0016021]; membrane [GO:0016020]; plasma membrane [GO:0005886]	GO:0005886; GO:0016020; GO:0016021; GO:0071875		hsa:92255;	17.0076	16.9977	16.9561	17.0422	16.8707	17.445	17.435	17.4895	17.4101	17.4902
C14orf166_Q9Y224	-0.9517	-1.04312	-1.02142	-0.524604	-1.10016	0.738243	0.821079	0.921158	0.885727	1.27479	C14orf166	UPF0568 protein C14orf166	Q9Y224	1.03114	4.74477e-08	1.78353e-06	-0.634692	FUNCTION: RNA-binding protein involved in modulation of mRNA transcription by Polymerase II (PubMed:16950395). Component of the tRNA-splicing ligase complex and is required for tRNA ligation (PubMed:24870230). May be required for RNA transport (PubMed:24608264). {ECO:0000269|PubMed:16950395, ECO:0000269|PubMed:24608264, ECO:0000269|PubMed:24870230}.; FUNCTION: (Microbial infection) In case of inf…	SUBCELLULAR LOCATION: Nucleus {ECO:0000269|PubMed:15147888, ECO:0000269|PubMed:24608264}. Cytoplasm, cytosol {ECO:0000269|PubMed:15147888, ECO:0000269|PubMed:24608264}. Cytoplasm, perinuclear region {ECO:0000269|PubMed:15147888}. Cytoplasm, cytoskeleton, microtubule organizing center, centrosome {ECO:0000269|PubMed:15147888}. Note=May localize at the centrosome during mitosis (PubMed:15147888). S…		negative regulation of protein kinase activity [GO:0006469]; positive regulation of transcription by RNA polymerase II [GO:0045944]; RNA transport [GO:0050658]; tRNA splicing, via endonucleolytic cleavage and ligation [GO:0006388]; viral process [GO:0016032]	identical protein binding [GO:0042802]; RNA binding [GO:0003723]; RNA polymerase II complex binding [GO:0000993]	centrosome [GO:0005813]; cytoplasm [GO:0005737]; cytosol [GO:0005829]; mitotic spindle [GO:0072686]; nucleoplasm [GO:0005654]; nucleus [GO:0005634]; perinuclear region of cytoplasm [GO:0048471]; tRNA-splicing ligase complex [GO:0072669]	GO:0000993; GO:0003723; GO:0005634; GO:0005654; GO:0005737; GO:0005813; GO:0005829; GO:0006388; GO:0006469; GO:0016032; GO:0042802; GO:0045944; GO:0048471; GO:0050658; GO:0072669; GO:0072686	R-HSA-6784531;	hsa:51637;	20.3761	20.3449	20.3523	20.5222	20.3254	20.9539	20.9823	21.0165	21.0044	21.1374
GPX1_A0A087WUQ6	-0.888282	-1.18728	-1.07307	-0.81501	-0.719367	0.747705	0.934535	1.00418	1.12893	0.867657	GPX1	Glutathione peroxidase;Glutathione peroxidase 1	A0A087WUQ6	1.01806	4.82487e-08	1.79785e-06	-0.33804				response to oxidative stress [GO:0006979]	glutathione peroxidase activity [GO:0004602]		GO:0004602; GO:0006979			18.7226	18.6686	18.6892	18.7358	18.7531	19.0178	19.0515	19.0641	19.0866	19.0395
SPTBN1_Q01082	-1.096	-0.922341	-0.723909	-0.904291	-1.05684	0.922019	0.827813	1.15964	0.888082	0.905825	SPTBN1	Spectrin beta chain, non-erythrocytic 1	Q01082	1.01232	4.83321e-08	1.79785e-06	-0.292243	FUNCTION: Fodrin, which seems to be involved in secretion, interacts with calmodulin in a calcium-dependent manner and is thus candidate for the calcium-dependent movement of the cytoskeleton at the membrane.	SUBCELLULAR LOCATION: Cytoplasm, cytoskeleton {ECO:0000250}. Cytoplasm, myofibril, sarcomere, M line {ECO:0000250}. Note=Colocalizes with ANK2 in a distinct intracellular compartment of neonatal cardiomyocytes. {ECO:0000250}.; SUBCELLULAR LOCATION: Isoform 2: Cell membrane {ECO:0000250}; Peripheral membrane protein {ECO:0000250}; Cytoplasmic side {ECO:0000250}.		actin filament capping [GO:0051693]; axon guidance [GO:0007411]; common-partner SMAD protein phosphorylation [GO:0007182]; endoplasmic reticulum to Golgi vesicle-mediated transport [GO:0006888]; Golgi to plasma membrane protein transport [GO:0043001]; MAPK cascade [GO:0000165]; membrane assembly [GO:0071709]; mitotic cytokinesis [GO:0000281]; plasma membrane organization [GO:0007009]; positive re…	actin binding [GO:0003779]; ankyrin binding [GO:0030506]; cadherin binding [GO:0045296]; calmodulin binding [GO:0005516]; GTPase binding [GO:0051020]; phospholipid binding [GO:0005543]; protein-containing complex binding [GO:0044877]; RNA binding [GO:0003723]; structural constituent of cytoskeleton [GO:0005200]	axolemma [GO:0030673]; cuticular plate [GO:0032437]; cytoplasm [GO:0005737]; cytosol [GO:0005829]; extracellular exosome [GO:0070062]; glutamatergic synapse [GO:0098978]; M band [GO:0031430]; nucleolus [GO:0005730]; postsynaptic density [GO:0014069]; spectrin [GO:0008091]; spectrin-associated cytoskeleton [GO:0014731]	GO:0000165; GO:0000281; GO:0003723; GO:0003779; GO:0005200; GO:0005516; GO:0005543; GO:0005730; GO:0005737; GO:0005829; GO:0006888; GO:0007009; GO:0007182; GO:0007411; GO:0008091; GO:0014069; GO:0014731; GO:0030506; GO:0030673; GO:0031430; GO:0032437; GO:0043001; GO:0044877; GO:0045296; GO:0051020; GO:0051693; GO:0060390; GO:0070062; GO:0071709; GO:0072659; GO:0098978; GO:1900042; GO:1903076; GO:…	R-HSA-373753;R-HSA-375165;R-HSA-445095;R-HSA-5673001;R-HSA-6807878;	hsa:6711;	23.6972	23.7242	23.755	23.727	23.7033	24.0106	23.996	24.0476	24.0054	24.0081
RCN1_Q15293	-1.04781	-0.956035	-0.942153	-0.661797	-1.0952	0.970379	0.95835	0.952213	0.776318	1.04573	RCN1	Reticulocalbin-1	Q15293	1.01455	4.86396e-08	1.79992e-06	-0.292662	FUNCTION: May regulate calcium-dependent activities in the endoplasmic reticulum lumen or post-ER compartment.	SUBCELLULAR LOCATION: Endoplasmic reticulum lumen.		cellular protein metabolic process [GO:0044267]; post-translational protein modification [GO:0043687]	calcium ion binding [GO:0005509]	endoplasmic reticulum [GO:0005783]; endoplasmic reticulum lumen [GO:0005788]	GO:0005509; GO:0005783; GO:0005788; GO:0043687; GO:0044267	R-HSA-381426;R-HSA-8957275;	hsa:5954;	20.1013	20.1156	20.1177	20.1613	20.0939	20.4153	20.4134	20.4124	20.3851	20.427
NARS_O43776	-1.17621	-0.765647	-0.906718	-0.885365	-0.965642	0.793371	0.915983	1.13522	0.843417	1.01159	NARS	Asparagine--tRNA ligase, cytoplasmic	O43776	1.01428	4.951e-08	1.81633e-06	-0.298191	FUNCTION: Catalyzes the attachment of asparagine to tRNA(Asn) in a two-step reaction: asparagine is first activated by ATP to form Asn-AMP and then transferred to the acceptor end of tRNA(Asn) (PubMed:9421509). In addition to its essential role in protein synthesis, acts as a signaling molecule that induced migration of CCR3-expressing cells (PubMed:30171954, PubMed:12235211). {ECO:0000269|PubMed…	SUBCELLULAR LOCATION: Cytoplasm {ECO:0000305|PubMed:9421509}.		asparaginyl-tRNA aminoacylation [GO:0006421]; tRNA aminoacylation for protein translation [GO:0006418]	asparagine-tRNA ligase activity [GO:0004816]; ATP binding [GO:0005524]; nucleic acid binding [GO:0003676]	cytoplasm [GO:0005737]; cytosol [GO:0005829]; extracellular exosome [GO:0070062]	GO:0003676; GO:0004816; GO:0005524; GO:0005737; GO:0005829; GO:0006418; GO:0006421; GO:0070062	R-HSA-379716;	hsa:4677;	20.8456	20.9107	20.8883	20.8917	20.879	21.158	21.1774	21.2122	21.1659	21.1926
NFKBIL1_Q5STV6	1.00146	0.968633	0.937347	0.723419	1.00281	-0.791225	-0.802577	-0.742087	-0.84029	-1.45749	NFKBIL1	NF-kappa-B inhibitor-like protein 1	Q5STV6	1.04862	4.95916e-08	1.81633e-06	0.806157				I-kappaB kinase/NF-kappaB signaling [GO:0007249]		nucleoplasm [GO:0005654]	GO:0005654; GO:0007249			17.4183	17.404	17.3904	17.2974	17.4189	16.6386	16.6336	16.6599	16.6172	16.3488
SQRDL_Q9Y6N5	-1.28974	-1.13745	-0.897673	-0.607926	-0.719101	1.0189	0.830036	0.883455	0.945149	0.974356	SQRDL	Sulfide:quinone oxidoreductase, mitochondrial	Q9Y6N5	1.02359	5.11551e-08	1.84565e-06	-0.478032	FUNCTION: Catalyzes the oxidation of hydrogen sulfide with the help of a quinone, such as ubiquinone, giving rise to thiosulfate and ultimately to sulfane (molecular sulfur) atoms. Requires an additional electron acceptor; can use sulfite, sulfide or cyanide (in vitro). {ECO:0000269|PubMed:22852582}.	SUBCELLULAR LOCATION: Mitochondrion {ECO:0000305}.		hydrogen sulfide metabolic process [GO:0070813]; sulfide oxidation, using sulfide:quinone oxidoreductase [GO:0070221]	FAD binding [GO:0071949]; quinone binding [GO:0048038]; sulfide:quinone oxidoreductase activity [GO:0070224]	mitochondrial inner membrane [GO:0005743]; mitochondrion [GO:0005739]	GO:0005739; GO:0005743; GO:0048038; GO:0070221; GO:0070224; GO:0070813; GO:0071949	R-HSA-1614517;	hsa:58472;	20.1687	20.2079	20.2695	20.3439	20.3153	20.7618	20.7133	20.727	20.7429	20.7504
HNMT_P50135	-0.921463	-1.05954	-0.715105	-0.709714	-1.23329	0.906164	0.990327	0.925559	0.606204	1.21086	HNMT	Histamine N-methyltransferase	P50135	1.03427	5.13135e-08	1.84565e-06	-0.635225	FUNCTION: Inactivates histamine by N-methylation. Plays an important role in degrading histamine and in regulating the airway response to histamine. {ECO:0000269|PubMed:26206890}.	SUBCELLULAR LOCATION: Cytoplasm {ECO:0000269|PubMed:26206890}.	DISEASE: Mental retardation, autosomal recessive 51 (MRT51) [MIM:616739]: A form of mental retardation, a disorder characterized by significantly below average general intellectual functioning associated with impairments in adaptive behavior and manifested during the developmental period. {ECO:0000269|PubMed:26206890}. Note=The disease is caused by mutations affecting distinct genetic loci, inclu…	brain development [GO:0007420]; histamine catabolic process [GO:0001695]; histidine catabolic process [GO:0006548]; hyperosmotic response [GO:0006972]; methylation [GO:0032259]; respiratory gaseous exchange by respiratory system [GO:0007585]; response to amine [GO:0014075]; response to cocaine [GO:0042220]; response to glucocorticoid [GO:0051384]; response to immobilization stress [GO:0035902]; r…	histamine N-methyltransferase activity [GO:0046539]	centrosome [GO:0005813]; cytoplasm [GO:0005737]; cytosol [GO:0005829]; extracellular exosome [GO:0070062]; neuron projection [GO:0043005]; nucleoplasm [GO:0005654]	GO:0001695; GO:0002347; GO:0005654; GO:0005737; GO:0005813; GO:0005829; GO:0006548; GO:0006972; GO:0007420; GO:0007585; GO:0014075; GO:0032259; GO:0035902; GO:0042220; GO:0043005; GO:0046539; GO:0051384; GO:0070062; GO:0070555	R-HSA-2408508;R-HSA-70921;	hsa:3176;	18.5392	18.4919	18.6098	18.6117	18.4324	19.1648	19.1936	19.1715	19.0621	19.2691
UTP23_Q9BRU9	1.02931	0.753487	0.754394	1.09269	1.01952	-0.574914	-0.916091	-0.9026	-0.983779	-1.27201	UTP23	rRNA-processing protein UTP23 homolog	Q9BRU9	1.02635	5.1351e-08	1.84565e-06	0.498836	FUNCTION: Involved in rRNA-processing and ribosome biogenesis. {ECO:0000250}.	SUBCELLULAR LOCATION: Nucleus, nucleolus {ECO:0000250}.		endonucleolytic cleavage in 5'-ETS of tricistronic rRNA transcript (SSU-rRNA, 5.8S rRNA, LSU-rRNA) [GO:0000480]	mRNA 3'-UTR binding [GO:0003730]; mRNA 5'-UTR binding [GO:0048027]; RNA binding [GO:0003723]; small ribosomal subunit rRNA binding [GO:0070181]	nucleolus [GO:0005730]; small-subunit processome [GO:0032040]	GO:0000480; GO:0003723; GO:0003730; GO:0005730; GO:0032040; GO:0048027; GO:0070181		hsa:84294;	19.4556	19.3816	19.3818	19.4726	19.453	19.0253	18.9338	18.9374	18.9156	18.8383
ITGAV_P06756	-1.00097	-0.889614	-0.545026	-1.02714	-1.20786	0.909292	0.894543	0.869225	0.903966	1.09358	ITGAV	Integrin alpha-V;Integrin alpha-V heavy chain;Integrin alpha-V light chain	P06756	1.02009	5.1426e-08	1.84565e-06	-0.373638	FUNCTION: The alpha-V (ITGAV) integrins are receptors for vitronectin, cytotactin, fibronectin, fibrinogen, laminin, matrix metalloproteinase-2, osteopontin, osteomodulin, prothrombin, thrombospondin and vWF. They recognize the sequence R-G-D in a wide array of ligands. ITGAV:ITGB3 binds to fractalkine (CX3CL1) and may act as its coreceptor in CX3CR1-dependent fractalkine signaling (PubMed:231254…	SUBCELLULAR LOCATION: Cell membrane; Single-pass type I membrane protein. Cell junction, focal adhesion {ECO:0000269|PubMed:17158881}.		angiogenesis [GO:0001525]; antigen processing and presentation of exogenous peptide antigen via MHC class I, TAP-dependent [GO:0002479]; apolipoprotein A-I-mediated signaling pathway [GO:0038027]; apoptotic cell clearance [GO:0043277]; calcium ion transmembrane transport [GO:0070588]; cell adhesion [GO:0007155]; cell adhesion mediated by integrin [GO:0033627]; cell-matrix adhesion [GO:0007160]; c…	coreceptor activity [GO:0015026]; extracellular matrix binding [GO:0050840]; extracellular matrix protein binding [GO:1990430]; fibronectin binding [GO:0001968]; integrin binding [GO:0005178]; metal ion binding [GO:0046872]; opsonin binding [GO:0001846]; protease binding [GO:0002020]; protein kinase C binding [GO:0005080]; transforming growth factor beta binding [GO:0050431]; virus receptor activ…	alphav-beta3 integrin-HMGB1 complex [GO:0035868]; alphav-beta3 integrin-IGF-1-IGF1R complex [GO:0035867]; alphav-beta3 integrin-PKCalpha complex [GO:0035866]; cell [GO:0005623]; cell surface [GO:0009986]; cytosol [GO:0005829]; external side of plasma membrane [GO:0009897]; extracellular exosome [GO:0070062]; filopodium membrane [GO:0031527]; focal adhesion [GO:0005925]; integral component of plas…	GO:0001525; GO:0001570; GO:0001618; GO:0001846; GO:0001968; GO:0002020; GO:0002479; GO:0005080; GO:0005178; GO:0005245; GO:0005623; GO:0005829; GO:0005886; GO:0005887; GO:0005925; GO:0007155; GO:0007160; GO:0007204; GO:0007229; GO:0008284; GO:0008305; GO:0009897; GO:0009986; GO:0010745; GO:0010888; GO:0015026; GO:0016020; GO:0030198; GO:0030335; GO:0031258; GO:0031527; GO:0031528; GO:0031589; GO:…	R-HSA-1236973;R-HSA-1566948;R-HSA-210990;R-HSA-2129379;R-HSA-216083;R-HSA-3000157;R-HSA-3000170;R-HSA-3000178;R-HSA-4420097;R-HSA-445144;R-HSA-6798695;	hsa:3685;	18.5865	18.6088	18.6777	18.5813	18.5451	18.9685	18.9656	18.9605	18.9675	19.0054
PLS1_Q14651	-0.879917	-0.946691	-0.875547	-0.824667	-1.13615	0.859497	0.749353	0.960904	0.74859	1.34463	PLS1	Plastin-1	Q14651	1.02072	5.17243e-08	1.84708e-06	-0.406262	FUNCTION: Actin-bundling protein in the absence of calcium.	SUBCELLULAR LOCATION: Cytoplasm.		actin filament bundle assembly [GO:0051017]; actin filament network formation [GO:0051639]; intestinal D-glucose absorption [GO:0001951]; positive regulation of multicellular organism growth [GO:0040018]; positive regulation of protein localization to plasma membrane [GO:1903078]; regulation of microvillus length [GO:0032532]; terminal web assembly [GO:1902896]	actin filament binding [GO:0051015]; calcium ion binding [GO:0005509]; structural constituent of cytoskeleton [GO:0005200]	actin filament [GO:0005884]; actin filament bundle [GO:0032432]; brush border [GO:0005903]; cytoplasm [GO:0005737]; extracellular exosome [GO:0070062]; terminal web [GO:1990357]	GO:0001951; GO:0005200; GO:0005509; GO:0005737; GO:0005884; GO:0005903; GO:0032432; GO:0032532; GO:0040018; GO:0051015; GO:0051017; GO:0051639; GO:0070062; GO:1902896; GO:1903078; GO:1990357		hsa:5357;	19.6178	19.6033	19.6188	19.6299	19.562	19.9967	19.9727	20.0188	19.9726	20.1024
PSME1_Q06323	-0.91054	-1.01475	-1.05327	-0.630982	-1.04595	1.06284	0.825051	0.85539	0.665146	1.24708	PSME1	Proteasome activator complex subunit 1	Q06323	1.02208	5.21895e-08	1.85442e-06	-0.447901	FUNCTION: Implicated in immunoproteasome assembly and required for efficient antigen processing. The PA28 activator complex enhances the generation of class I binding peptides by altering the cleavage pattern of the proteasome.			anaphase-promoting complex-dependent catabolic process [GO:0031145]; antigen processing and presentation of exogenous peptide antigen via MHC class I, TAP-dependent [GO:0002479]; Fc-epsilon receptor signaling pathway [GO:0038095]; interleukin-1-mediated signaling pathway [GO:0070498]; MAPK cascade [GO:0000165]; negative regulation of canonical Wnt signaling pathway [GO:0090090]; negative regulati…	endopeptidase activator activity [GO:0061133]	cytoplasm [GO:0005737]; cytosol [GO:0005829]; extracellular exosome [GO:0070062]; nucleoplasm [GO:0005654]; proteasome activator complex [GO:0008537]; proteasome complex [GO:0000502]	GO:0000165; GO:0000209; GO:0000502; GO:0002223; GO:0002479; GO:0005654; GO:0005737; GO:0005829; GO:0006521; GO:0008537; GO:0010950; GO:0010972; GO:0016579; GO:0031145; GO:0031146; GO:0033209; GO:0038061; GO:0038095; GO:0043161; GO:0043488; GO:0043687; GO:0050852; GO:0055085; GO:0060071; GO:0061133; GO:0061136; GO:0061418; GO:0070062; GO:0070498; GO:0090090; GO:0090263; GO:1901990; GO:1902036; GO:…	R-HSA-1169091;R-HSA-1234176;R-HSA-1236974;R-HSA-1236978;R-HSA-174084;R-HSA-174113;R-HSA-174154;R-HSA-174178;R-HSA-174184;R-HSA-180534;R-HSA-180585;R-HSA-187577;R-HSA-195253;R-HSA-202424;R-HSA-211733;R-HSA-2467813;R-HSA-2871837;R-HSA-349425;R-HSA-350562;R-HSA-382556;R-HSA-450408;R-HSA-4608870;R-HSA-4641257;R-HSA-4641258;R-HSA-5358346;R-HSA-5362768;R-HSA-5607761;R-HSA-5607764;R-HSA-5610780;R-HSA-56…	hsa:5720;	20.2873	20.2623	20.253	20.3546	20.2547	20.762	20.7048	20.7121	20.6663	20.8063
RMDN1_Q96DB5	-0.79718	-1.17331	-1.24684	-0.515976	-0.907924	0.925872	0.983994	0.885791	0.80132	1.04425	RMDN1	Regulator of microtubule dynamics protein 1	Q96DB5	1.03004	5.583e-08	1.97395e-06	-0.567899		SUBCELLULAR LOCATION: Cytoplasm {ECO:0000269|PubMed:18070910}. Cytoplasm, cytoskeleton, spindle {ECO:0000269|PubMed:18070910}. Cytoplasm, cytoskeleton, spindle pole {ECO:0000269|PubMed:18070910}. Note=In interphase localizes in the cytoplasm, and during mitosis localizes to the spindle microtubules and spindle poles.				cytoplasm [GO:0005737]; microtubule [GO:0005874]; spindle pole [GO:0000922]	GO:0000922; GO:0005737; GO:0005874		hsa:51115;	18.9477	18.8327	18.8102	19.0338	18.9139	19.4748	19.4926	19.4626	19.4367	19.511
UBE2R2_Q712K3	-1.10104	-1.07237	-0.450413	-0.971526	-1.04888	0.936265	1.09507	1.02337	0.74728	0.842247	UBE2R2	Ubiquitin-conjugating enzyme E2 R2	Q712K3	1.03092	5.6621e-08	1.98134e-06	-0.52698	FUNCTION: Accepts ubiquitin from the E1 complex and catalyzes its covalent attachment to other proteins. In vitro catalyzes monoubiquitination and 'Lys-48'-linked polyubiquitination. May be involved in degradation of katenin. {ECO:0000269|PubMed:12037680, ECO:0000269|PubMed:20061386}.			protein K48-linked ubiquitination [GO:0070936]; protein monoubiquitination [GO:0006513]; protein ubiquitination [GO:0016567]	ATP binding [GO:0005524]; ubiquitin conjugating enzyme activity [GO:0061631]; ubiquitin-protein transferase activity [GO:0004842]	cytosol [GO:0005829]	GO:0004842; GO:0005524; GO:0005829; GO:0006513; GO:0016567; GO:0061631; GO:0070936	R-HSA-8866652;R-HSA-983168;	hsa:54926;	16.9932	17.0014	17.1778	17.03	17.008	17.5712	17.6162	17.5959	17.5175	17.5445
CAP1_Q01518	-0.914611	-1.09703	-0.9598	-0.655728	-1.04685	0.730203	1.02199	0.986432	0.756386	1.17902	CAP1	Adenylyl cyclase-associated protein 1	Q01518	1.01614	5.67041e-08	1.98134e-06	-0.353131	FUNCTION: Directly regulates filament dynamics and has been implicated in a number of complex developmental and morphological processes, including mRNA localization and the establishment of cell polarity.	SUBCELLULAR LOCATION: Cell membrane {ECO:0000250}; Peripheral membrane protein {ECO:0000250}.		actin polymerization or depolymerization [GO:0008154]; activation of adenylate cyclase activity [GO:0007190]; ameboidal-type cell migration [GO:0001667]; cell morphogenesis [GO:0000902]; establishment or maintenance of cell polarity [GO:0007163]; neutrophil degranulation [GO:0043312]; receptor-mediated endocytosis [GO:0006898]; signal transduction [GO:0007165]	actin binding [GO:0003779]; adenylate cyclase binding [GO:0008179]	azurophil granule lumen [GO:0035578]; cortical actin cytoskeleton [GO:0030864]; extracellular exosome [GO:0070062]; extracellular region [GO:0005576]; focal adhesion [GO:0005925]; plasma membrane [GO:0005886]	GO:0000902; GO:0001667; GO:0003779; GO:0005576; GO:0005886; GO:0005925; GO:0006898; GO:0007163; GO:0007165; GO:0007190; GO:0008154; GO:0008179; GO:0030864; GO:0035578; GO:0043312; GO:0070062	R-HSA-114608;R-HSA-428890;R-HSA-6798695;	hsa:10487;	21.8791	21.8447	21.8706	21.928	21.8542	22.1898	22.2449	22.2382	22.1948	22.2746
SNX17_Q15036	-1.06815	-0.894001	-0.642359	-1.0107	-1.05635	0.855879	0.868186	0.908355	0.775256	1.26388	SNX17	Sorting nexin-17	Q15036	1.01882	5.69349e-08	1.98134e-06	-0.361037	FUNCTION: Critical regulator of endosomal recycling of numerous surface proteins, including integrins, signaling receptor and channels (PubMed:15121882, PubMed:15769472). Binds to NPxY sequences in the cytoplasmic tails of target cargos (PubMed:21512128). Associates with retriever and CCC complexes to prevent lysosomal degradation and promote cell surface recycling of numerous cargos such as inte…	SUBCELLULAR LOCATION: Cytoplasm {ECO:0000269|PubMed:11237770, ECO:0000269|PubMed:21512128}. Early endosome {ECO:0000269|PubMed:14739284, ECO:0000269|PubMed:15121882, ECO:0000269|PubMed:15769472, ECO:0000269|PubMed:21512128, ECO:0000269|PubMed:28892079}. Cytoplasmic vesicle membrane {ECO:0000269|PubMed:11237770, ECO:0000269|PubMed:16712798}; Peripheral membrane protein {ECO:0000269|PubMed:11237770…		aorta development [GO:0035904]; cardiac septum development [GO:0003279]; cholesterol catabolic process [GO:0006707]; coronary vasculature development [GO:0060976]; endocytic recycling [GO:0032456]; endosomal transport [GO:0016197]; intracellular protein transport [GO:0006886]; receptor-mediated endocytosis [GO:0006898]; regulation of endocytosis [GO:0030100]; retrograde transport, endosome to pla…	low-density lipoprotein particle receptor binding [GO:0050750]; phosphatidylinositol binding [GO:0035091]; protein C-terminus binding [GO:0008022]; signaling receptor binding [GO:0005102]	cytoplasmic vesicle [GO:0031410]; cytoplasmic vesicle membrane [GO:0030659]; cytosol [GO:0005829]; early endosome [GO:0005769]; endosome [GO:0005768]; endosome membrane [GO:0010008]; Golgi apparatus [GO:0005794]; intracellular membrane-bounded organelle [GO:0043231]; membrane [GO:0016020]; protein-containing complex [GO:0032991]	GO:0003279; GO:0005102; GO:0005768; GO:0005769; GO:0005794; GO:0005829; GO:0006707; GO:0006886; GO:0006898; GO:0007165; GO:0008022; GO:0010008; GO:0016020; GO:0016197; GO:0030100; GO:0030659; GO:0031410; GO:0032456; GO:0032991; GO:0035091; GO:0035904; GO:0043231; GO:0050750; GO:0060976; GO:1990126		hsa:9784;	19.154	19.1877	19.2363	19.1651	19.1563	19.5258	19.5282	19.5359	19.5102	19.6046
ARL2_P36404	-1.13588	-0.909987	-0.716096	-0.945354	-0.97924	0.674567	1.02672	0.877608	0.964921	1.14274	ARL2	ADP-ribosylation factor-like protein 2	P36404	1.01647	5.71488e-08	1.98134e-06	-0.318179	FUNCTION: Small GTP-binding protein which cycles between an inactive GDP-bound and an active GTP-bound form, and the rate of cycling is regulated by guanine nucleotide exchange factors (GEF) and GTPase-activating proteins (GAP). GTP-binding protein that does not act as an allosteric activator of the cholera toxin catalytic subunit. Regulates formation of new microtubules and centrosome integrity.…	SUBCELLULAR LOCATION: Mitochondrion intermembrane space. Cytoplasm, cytoskeleton, microtubule organizing center, centrosome. Nucleus. Cytoplasm. Note=The complex formed with ARL2BP, ARL2 and SLC25A6 is expressed in mitochondria. The complex formed with ARL2BP, ARL2 and SLC25A4 is expressed in mitochondria (By similarity). Not detected in the Golgi, nucleus and on the mitotic spindle. Centrosome-a…		bicellular tight junction assembly [GO:0070830]; centrosome cycle [GO:0007098]; maintenance of protein location in nucleus [GO:0051457]; negative regulation of GTPase activity [GO:0034260]; positive regulation of cell-substrate adhesion [GO:0010811]; positive regulation of microtubule polymerization [GO:0031116]; regulation of insulin secretion [GO:0050796]; regulation of microtubule polymerizati…	GDP binding [GO:0019003]; GTPase activity [GO:0003924]; GTPase inhibitor activity [GO:0005095]; GTP binding [GO:0005525]	centrosome [GO:0005813]; cytoplasm [GO:0005737]; cytosol [GO:0005829]; focal adhesion [GO:0005925]; Golgi apparatus [GO:0005794]; lateral plasma membrane [GO:0016328]; microtubule cytoskeleton [GO:0015630]; mitochondrial intermembrane space [GO:0005758]; mitochondrial matrix [GO:0005759]; nucleolus [GO:0005730]; nucleoplasm [GO:0005654]; nucleus [GO:0005634]	GO:0003924; GO:0005095; GO:0005525; GO:0005634; GO:0005654; GO:0005730; GO:0005737; GO:0005758; GO:0005759; GO:0005794; GO:0005813; GO:0005829; GO:0005925; GO:0007021; GO:0007098; GO:0010811; GO:0015630; GO:0016328; GO:0019003; GO:0031113; GO:0031116; GO:0034260; GO:0050796; GO:0051457; GO:0070830	R-HSA-389977;R-HSA-83936;	hsa:402;	19.2811	19.3194	19.3523	19.3134	19.3077	19.5884	19.6482	19.6228	19.6377	19.6678
SAR1A_Q9NR31	-1.13201	-0.684387	-0.993903	-0.813397	-1.03721	0.681883	0.722089	1.08421	1.12296	1.04975	SAR1A	GTP-binding protein SAR1a	Q9NR31	1.02027	5.76645e-08	1.98956e-06	-0.403323	FUNCTION: Involved in transport from the endoplasmic reticulum to the Golgi apparatus (By similarity). Required to maintain SEC16A localization at discrete locations on the ER membrane perhaps by preventing its dissociation. SAR1A-GTP-dependent assembly of SEC16A on the ER membrane forms an organized scaffold defining endoplasmic reticulum exit sites (ERES). {ECO:0000250, ECO:0000269|PubMed:17005…	SUBCELLULAR LOCATION: Endoplasmic reticulum {ECO:0000250}. Golgi apparatus {ECO:0000250}.		COPII-coated vesicle cargo loading [GO:0090110]; endoplasmic reticulum to Golgi vesicle-mediated transport [GO:0006888]; intracellular protein transport [GO:0006886]; membrane organization [GO:0061024]; positive regulation of protein exit from endoplasmic reticulum [GO:0070863]; regulation of COPII vesicle coating [GO:0003400]; vesicle organization [GO:0016050]	GTPase activity [GO:0003924]; GTP binding [GO:0005525]	COPII vesicle coat [GO:0030127]; endoplasmic reticulum [GO:0005783]; endoplasmic reticulum exit site [GO:0070971]; Golgi membrane [GO:0000139]	GO:0000139; GO:0003400; GO:0003924; GO:0005525; GO:0005783; GO:0006886; GO:0006888; GO:0016050; GO:0030127; GO:0061024; GO:0070863; GO:0070971; GO:0090110		hsa:56681;	19.854	19.9508	19.8838	19.9229	19.8745	20.2464	20.2551	20.3334	20.3418	20.3259
ALG6_S4R350	-0.759794	-1.02762	-0.865036	-0.664721	-1.31355	0.873302	0.923553	0.964125	0.653732	1.216	ALG6	Dolichyl pyrophosphate Man9GlcNAc2 alpha-1,3-glucosyltransferase	S4R350	1.05441	5.85885e-08	2.01173e-06	-0.767545		SUBCELLULAR LOCATION: Endoplasmic reticulum membrane {ECO:0000256|RuleBase:RU363110}; Multi-pass membrane protein {ECO:0000256|RuleBase:RU363110}.		dolichol-linked oligosaccharide biosynthetic process [GO:0006488]	dolichyl pyrophosphate Man9GlcNAc2 alpha-1,3-glucosyltransferase activity [GO:0042281]	endoplasmic reticulum membrane [GO:0005789]; integral component of membrane [GO:0016021]	GO:0005789; GO:0006488; GO:0016021; GO:0042281			14.1748	14.0638	14.1312	14.2142	13.9453	14.8515	14.8723	14.8891	14.7605	14.9935
XPO6_Q96QU8	-0.857664	-0.953991	-1.03328	-0.807813	-0.987306	0.873932	0.835293	0.780879	0.702859	1.44709	XPO6	Exportin-6	Q96QU8	1.03317	5.88703e-08	2.01173e-06	-0.566229	FUNCTION: Mediates the nuclear export of actin and profilin-actin complexes in somatic cells. {ECO:0000269|PubMed:14592989}.	SUBCELLULAR LOCATION: Nucleus {ECO:0000269|PubMed:14592989}. Cytoplasm {ECO:0000269|PubMed:14592989}. Note=Shuttles between the nucleus and the cytoplasm. {ECO:0000269|PubMed:14592989}.		protein export from nucleus [GO:0006611]	nuclear export signal receptor activity [GO:0005049]; Ran GTPase binding [GO:0008536]	cytoplasm [GO:0005737]; cytosol [GO:0005829]; nucleolus [GO:0005730]; nucleoplasm [GO:0005654]; nucleus [GO:0005634]; plasma membrane [GO:0005886]; protein-containing complex [GO:0032991]	GO:0005049; GO:0005634; GO:0005654; GO:0005730; GO:0005737; GO:0005829; GO:0005886; GO:0006611; GO:0008536; GO:0032991		hsa:23214;	17.0904	17.061	17.0369	17.1056	17.0509	17.6187	17.6069	17.5903	17.5665	17.7936
MYH7_P12883	-0.903617	-1.06471	-0.779849	-0.647397	-1.23231	0.930877	0.688244	0.828262	0.866119	1.31438	MYH7	Myosin-7;Myosin-3	P12883	1.06329	5.96794e-08	2.02967e-06	-0.864404	FUNCTION: Myosins are actin-based motor molecules with ATPase activity essential for muscle contraction. Forms regular bipolar thick filaments that, together with actin thin filaments, constitute the fundamental contractile unit of skeletal and cardiac muscle. {ECO:0000305|PubMed:26150528, ECO:0000305|PubMed:26246073}.	SUBCELLULAR LOCATION: Cytoplasm, myofibril {ECO:0000250|UniProtKB:P02564}. Cytoplasm, myofibril, sarcomere {ECO:0000250|UniProtKB:P02564}. Note=Thick filaments of the myofibrils. {ECO:0000250|UniProtKB:P02564}.	DISEASE: Cardiomyopathy, familial hypertrophic 1 (CMH1) [MIM:192600]: A hereditary heart disorder characterized by ventricular hypertrophy, which is usually asymmetric and often involves the interventricular septum. The symptoms include dyspnea, syncope, collapse, palpitations, and chest pain. They can be readily provoked by exercise. The disorder has inter- and intrafamilial variability ranging …	adult heart development [GO:0007512]; ATP metabolic process [GO:0046034]; cardiac muscle contraction [GO:0060048]; cardiac muscle hypertrophy in response to stress [GO:0014898]; muscle contraction [GO:0006936]; muscle filament sliding [GO:0030049]; regulation of heart rate [GO:0002027]; regulation of slow-twitch skeletal muscle fiber contraction [GO:0031449]; regulation of the force of heart cont…	actin-dependent ATPase activity [GO:0030898]; actin filament binding [GO:0051015]; ATPase activity [GO:0016887]; ATP binding [GO:0005524]; calmodulin binding [GO:0005516]; microfilament motor activity [GO:0000146]	muscle myosin complex [GO:0005859]; myofibril [GO:0030016]; myosin complex [GO:0016459]; myosin filament [GO:0032982]; sarcomere [GO:0030017]; stress fiber [GO:0001725]; Z disc [GO:0030018]	GO:0000146; GO:0001725; GO:0002026; GO:0002027; GO:0003009; GO:0005516; GO:0005524; GO:0005859; GO:0006936; GO:0006941; GO:0007512; GO:0014728; GO:0014883; GO:0014898; GO:0016459; GO:0016887; GO:0030016; GO:0030017; GO:0030018; GO:0030049; GO:0030898; GO:0031449; GO:0032982; GO:0046034; GO:0051015; GO:0055010; GO:0060048		hsa:4625;	13.6681	13.5928	13.7259	13.7877	13.5146	14.5247	14.4114	14.4768	14.4944	14.7038
TCEAL4_Q96EI5	-0.686714	-0.96262	-0.791836	-1.07431	-1.12421	0.631084	0.75723	0.923034	1.05801	1.27033	TCEAL4	Transcription elongation factor A protein-like 4	Q96EI5	1.03432	6.03821e-08	2.04384e-06	-0.562624	FUNCTION: May be involved in transcriptional regulation.	SUBCELLULAR LOCATION: Nucleus {ECO:0000305}.			WW domain binding [GO:0050699]	nucleus [GO:0005634]	GO:0005634; GO:0050699		hsa:79921;	16.4644	16.3807	16.4325	16.3469	16.3317	16.8639	16.9021	16.9524	16.9933	17.0577
MLEC_Q14165	-1.05352	-0.576615	-1.12679	-1.00327	-0.903962	0.847696	0.867213	0.891615	0.826694	1.23094	MLEC	Malectin	Q14165	1.01937	6.06755e-08	2.04408e-06	-0.383007	FUNCTION: Carbohydrate-binding protein with a strong ligand preference for Glc2-N-glycan. May play a role in the early steps of protein N-glycosylation (By similarity). {ECO:0000250}.	SUBCELLULAR LOCATION: Endoplasmic reticulum membrane {ECO:0000250}; Single-pass type I membrane protein {ECO:0000250}.		carbohydrate metabolic process [GO:0005975]; neutrophil degranulation [GO:0043312]; protein folding [GO:0006457]	carbohydrate binding [GO:0030246]; enzyme binding [GO:0019899]	endoplasmic reticulum [GO:0005783]; endoplasmic reticulum membrane [GO:0005789]; integral component of membrane [GO:0016021]; membrane [GO:0016020]; plasma membrane [GO:0005886]; specific granule membrane [GO:0035579]	GO:0005783; GO:0005789; GO:0005886; GO:0005975; GO:0006457; GO:0016020; GO:0016021; GO:0019899; GO:0030246; GO:0035579; GO:0043312	R-HSA-532668;R-HSA-6798695;	hsa:9761;	19.7515	19.8494	19.7365	19.7618	19.7822	20.1418	20.1458	20.1508	20.1375	20.2205
LMO7_F8WD26	-1.03317	-0.849559	-0.754283	-1.21676	-0.825485	0.71352	0.84933	0.956364	1.04899	1.11106	LMO7		F8WD26	1.01561	6.19588e-08	2.07751e-06	-0.331254				cell-cell adhesion [GO:0098609]; positive regulation of transcription by RNA polymerase II [GO:0045944]; regulation of cell adhesion [GO:0030155]; regulation of signaling [GO:0023051]	actinin binding [GO:0042805]; metal ion binding [GO:0046872]; protein C-terminus binding [GO:0008022]	apical plasma membrane [GO:0016324]; cell-cell adherens junction [GO:0005913]; cytoplasm [GO:0005737]; nuclear envelope [GO:0005635]; nucleoplasm [GO:0005654]	GO:0005635; GO:0005654; GO:0005737; GO:0005913; GO:0008022; GO:0016324; GO:0023051; GO:0030155; GO:0042805; GO:0045944; GO:0046872; GO:0098609		hsa:4008;	21.1991	21.2315	21.2484	21.1666	21.2358	21.5082	21.5322	21.5512	21.5676	21.5785
MTERF4_B4DFP7	-1.06485	-1.11431	-0.840266	-0.547928	-1.0638	0.751648	0.873118	0.771266	0.935285	1.29983	MTERF4	Transcription termination factor 4, mitochondrial;mTERF domain-containing protein 2 processed	B4DFP7	1.04382	6.24661e-08	2.08473e-06	-0.706954				regulation of transcription, DNA-templated [GO:0006355]	double-stranded DNA binding [GO:0003690]		GO:0003690; GO:0006355			16.0787	16.0598	16.1644	16.276	16.0791	16.7719	16.8183	16.7794	16.842	16.9811
MOCOS_Q96EN8	-0.960888	-0.82582	-0.785405	-1.12287	-0.998058	0.851486	0.8207	0.851027	0.936596	1.23323	MOCOS	Molybdenum cofactor sulfurase	Q96EN8	1.01728	6.34224e-08	2.0943e-06	-0.298721	FUNCTION: Sulfurates the molybdenum cofactor. Sulfation of molybdenum is essential for xanthine dehydrogenase (XDH) and aldehyde oxidase (ADO) enzymes in which molybdenum cofactor is liganded by 1 oxygen and 1 sulfur atom in active form. In vitro, the C-terminal domain is able to reduce N-hydroxylated prodrugs, such as benzamidoxime. {ECO:0000255|HAMAP-Rule:MF_03050, ECO:0000269|PubMed:16973608}.		DISEASE: Xanthinuria 2 (XAN2) [MIM:603592]: A disorder characterized by excretion of very large amounts of xanthine in the urine and a tendency to form xanthine stones. Uric acid is strikingly diminished in serum and urine. In addition, XAN2 patients cannot metabolize allopurinol into oxypurinol due to dual deficiency of xanthine dehydrogenase and aldehyde oxidase. {ECO:0000269|PubMed:11302742, E…	molybdopterin cofactor biosynthetic process [GO:0032324]; molybdopterin cofactor metabolic process [GO:0043545]; Mo-molybdopterin cofactor biosynthetic process [GO:0006777]	lyase activity [GO:0016829]; molybdenum cofactor sulfurtransferase activity [GO:0102867]; molybdenum ion binding [GO:0030151]; Mo-molybdopterin cofactor sulfurase activity [GO:0008265]; pyridoxal phosphate binding [GO:0030170]	cytosol [GO:0005829]	GO:0005829; GO:0006777; GO:0008265; GO:0016829; GO:0030151; GO:0030170; GO:0032324; GO:0043545; GO:0102867	R-HSA-947581;	hsa:55034;	17.2848	17.3063	17.3128	17.2591	17.2789	17.5732	17.5683	17.5732	17.5868	17.634
RAB7A_P51149	-1.06901	-0.924796	-0.82183	-0.784805	-1.09437	0.857634	0.737772	0.91488	1.02143	1.16311	RAB7A	Ras-related protein Rab-7a	P51149	1.01398	6.34229e-08	2.0943e-06	-0.295344	FUNCTION: Key regulator in endo-lysosomal trafficking. Governs early-to-late endosomal maturation, microtubule minus-end as well as plus-end directed endosomal migration and positioning, and endosome-lysosome transport through different protein-protein interaction cascades. Plays a central role, not only in endosomal traffic, but also in many other cellular and physiological events, such as growt…	SUBCELLULAR LOCATION: Cytoplasmic vesicle, phagosome membrane {ECO:0000269|PubMed:12944476, ECO:0000269|PubMed:21255211}; Peripheral membrane protein {ECO:0000305}; Cytoplasmic side {ECO:0000305}. Late endosome membrane {ECO:0000269|PubMed:12944476, ECO:0000269|PubMed:14617358, ECO:0000269|PubMed:16176980, ECO:0000269|PubMed:20028791}; Peripheral membrane protein {ECO:0000305}; Cytoplasmic side {…	DISEASE: Charcot-Marie-Tooth disease 2B (CMT2B) [MIM:600882]: A dominant axonal form of Charcot-Marie-Tooth disease, a disorder of the peripheral nervous system, characterized by progressive weakness and atrophy, initially of the peroneal muscles and later of the distal muscles of the arms. Charcot-Marie-Tooth disease is classified in two main groups on the basis of electrophysiologic properties …	antigen processing and presentation of exogenous peptide antigen via MHC class II [GO:0019886]; autophagosome assembly [GO:0000045]; early endosome to late endosome transport [GO:0045022]; endocytosis [GO:0006897]; endosome to lysosome transport [GO:0008333]; epidermal growth factor catabolic process [GO:0007174]; intracellular protein transport [GO:0006886]; lipid catabolic process [GO:0016042];…	GDP binding [GO:0019003]; GTPase activity [GO:0003924]; GTP binding [GO:0005525]; retromer complex binding [GO:1905394]	autophagosome membrane [GO:0000421]; cell [GO:0005623]; cytosol [GO:0005829]; endosome membrane [GO:0010008]; extracellular exosome [GO:0070062]; extrinsic component of lysosome membrane [GO:0032419]; Golgi apparatus [GO:0005794]; late endosome [GO:0005770]; late endosome membrane [GO:0031902]; lipid droplet [GO:0005811]; lysosomal membrane [GO:0005765]; lysosome [GO:0005764]; melanosome membrane…	GO:0000045; GO:0000421; GO:0003924; GO:0005525; GO:0005623; GO:0005764; GO:0005765; GO:0005770; GO:0005794; GO:0005811; GO:0005829; GO:0005886; GO:0006622; GO:0006886; GO:0006897; GO:0007174; GO:0008333; GO:0010008; GO:0015031; GO:0016042; GO:0019003; GO:0019076; GO:0019886; GO:0022615; GO:0030667; GO:0030670; GO:0031902; GO:0032419; GO:0032482; GO:0033162; GO:0034045; GO:0042147; GO:0043312; GO:…	R-HSA-2132295;R-HSA-6798695;R-HSA-8854214;R-HSA-8873719;R-HSA-8876198;	hsa:7879;	21.0988	21.1215	21.1377	21.1435	21.0948	21.4018	21.3829	21.4108	21.4276	21.4498
AATF_Q9NY61	0.899677	1.07858	0.990677	0.730098	0.964218	-0.580424	-0.941	-1.08194	-0.84489	-1.215	AATF	Protein AATF	Q9NY61	1.01853	6.40766e-08	2.0943e-06	0.381032	FUNCTION: May function as a general inhibitor of the histone deacetylase HDAC1. Binding to the pocket region of RB1 may displace HDAC1 from RB1/E2F complexes, leading to activation of E2F target genes and cell cycle progression. Conversely, displacement of HDAC1 from SP1 bound to the CDKN1A promoter leads to increased expression of this CDK inhibitor and blocks cell cycle progression. Also antago…	SUBCELLULAR LOCATION: Nucleus, nucleolus {ECO:0000269|PubMed:12429849}.		cellular response to DNA damage stimulus [GO:0006974]; negative regulation of amyloid precursor protein biosynthetic process [GO:0042985]; negative regulation of apoptotic process [GO:0043066]; negative regulation of apoptotic signaling pathway [GO:2001234]; negative regulation of reactive oxygen species metabolic process [GO:2000378]; negative regulation of superoxide anion generation [GO:003292…	leucine zipper domain binding [GO:0043522]; protein kinase binding [GO:0019901]; RNA binding [GO:0003723]; tau protein binding [GO:0048156]	cytoplasm [GO:0005737]; Golgi apparatus [GO:0005794]; nuclear transcription factor complex [GO:0044798]; nucleolus [GO:0005730]; nucleoplasm [GO:0005654]; nucleus [GO:0005634]	GO:0003723; GO:0005634; GO:0005654; GO:0005730; GO:0005737; GO:0005794; GO:0006974; GO:0007346; GO:0019901; GO:0032929; GO:0042254; GO:0042985; GO:0043066; GO:0043522; GO:0044798; GO:0045944; GO:0048156; GO:2000378; GO:2001234	R-HSA-193648;	hsa:26574;	20.9402	20.9767	20.9588	20.9055	20.9534	20.6378	20.5642	20.5354	20.5838	20.5082
EPHX4_Q8IUS5	-1.03695	-0.986516	-0.688735	-1.14873	-0.773176	0.854512	0.895968	0.821027	0.695471	1.36713	EPHX4	Epoxide hydrolase 4	Q8IUS5	1.04222	6.42015e-08	2.0943e-06	-0.626182		SUBCELLULAR LOCATION: Membrane {ECO:0000305}; Single-pass type II membrane protein {ECO:0000305}.			hydrolase activity [GO:0016787]	integral component of membrane [GO:0016021]	GO:0016021; GO:0016787		hsa:253152;	14.7955	14.8126	14.9132	14.7578	14.8846	15.4345	15.4485	15.4232	15.3808	15.6077
_A0A1B0GW05	-0.912061	-0.536741	-1.0623	-1.00401	-1.15274	0.867159	1.12224	0.955959	0.806564	0.915933			A0A1B0GW05	1.02209	6.43542e-08	2.0943e-06	-0.363162						integral component of membrane [GO:0016021]	GO:0016021			16.4413	16.5143	16.412	16.4234	16.3944	16.7873	16.8369	16.8046	16.7755	16.7968
CNTNAP1_P78357	-0.914518	-1.38389	-0.741352	-0.552756	-1.04317	0.965331	0.947108	0.868367	0.958412	0.89647	CNTNAP1	Contactin-associated protein 1	P78357	1.03573	6.45651e-08	2.0943e-06	-0.596692	FUNCTION: Required, with CNTNAP2, for radial and longitudinal organization of myelinated axons. Plays a role in the formation of functional distinct domains critical for saltatory conduction of nerve impulses in myelinated nerve fibers. Demarcates the paranodal region of the axo-glial junction. In association with contactin involved in the signaling between axons and myelinating glial cells. {ECO…	SUBCELLULAR LOCATION: Membrane {ECO:0000305}; Single-pass type I membrane protein {ECO:0000305}. Cell junction, paranodal septate junction {ECO:0000250|UniProtKB:O54991}.	DISEASE: Lethal congenital contracture syndrome 7 (LCCS7) [MIM:616286]: A form of lethal congenital contracture syndrome, an autosomal recessive disorder characterized by degeneration of anterior horn neurons, extreme skeletal muscle atrophy and congenital non-progressive joint contractures. The contractures can involve the upper or lower limbs and/or the vertebral column, leading to various degr…	cell adhesion [GO:0007155]; central nervous system myelination [GO:0022010]; cytoskeleton organization [GO:0007010]; myelination in peripheral nervous system [GO:0022011]; neuromuscular process controlling balance [GO:0050885]; neuromuscular process controlling posture [GO:0050884]; neuronal action potential propagation [GO:0019227]; neuron projection morphogenesis [GO:0048812]; paranodal junctio…	SH3/SH2 adaptor activity [GO:0005070]; SH3 domain binding [GO:0017124]; signaling receptor activity [GO:0038023]	integral component of membrane [GO:0016021]; integral component of plasma membrane [GO:0005887]; paranodal junction [GO:0033010]; paranode region of axon [GO:0033270]; presynaptic active zone membrane [GO:0048787]	GO:0002175; GO:0005070; GO:0005887; GO:0007010; GO:0007155; GO:0007165; GO:0016021; GO:0017124; GO:0019227; GO:0022010; GO:0022011; GO:0030913; GO:0033010; GO:0033270; GO:0038023; GO:0048787; GO:0048812; GO:0050884; GO:0050885; GO:0071205	R-HSA-447043;	hsa:8506;	16.7031	16.5521	16.7589	16.8196	16.6617	17.3081	17.3022	17.2769	17.3058	17.2859
CMBL_Q96DG6	-0.993794	-0.884405	-0.632887	-1.19593	-0.943136	0.936102	0.798187	0.902941	0.727823	1.2851	CMBL	Carboxymethylenebutenolidase homolog	Q96DG6	1.02425	6.48691e-08	2.0943e-06	-0.447626	FUNCTION: Cysteine hydrolase. Can convert the prodrug olmesartan medoxomil into its pharmacologically active metabolite olmerstatan, an angiotensin receptor blocker, in liver and intestine. May also activate beta-lactam antibiotics faropenem medoxomil and lenampicillin. {ECO:0000269|PubMed:20177059}.	SUBCELLULAR LOCATION: Cytoplasm, cytosol {ECO:0000269|PubMed:20177059}.		xenobiotic metabolic process [GO:0006805]	hydrolase activity [GO:0016787]	cytosol [GO:0005829]; extracellular exosome [GO:0070062]	GO:0005829; GO:0006805; GO:0016787; GO:0070062	R-HSA-211945;	hsa:134147;	18.4472	18.4735	18.534	18.3985	18.4594	18.9116	18.8784	18.9036	18.8615	18.9956
OTUD7B_Q6GQQ9	-0.853139	-1.28871	-0.849383	-0.561323	-1.10587	0.910793	0.93972	0.851567	0.99332	0.963027	OTUD7B	OTU domain-containing protein 7B	Q6GQQ9	1.02386	6.50987e-08	2.0943e-06	-0.400534	FUNCTION: Negative regulator of the non-canonical NF-kappa-B pathway that acts by mediating deubiquitination of TRAF3, an inhibitor of the NF-kappa-B pathway, thereby acting as a negative regulator of B-cell responses. In response to non-canonical NF-kappa-B stimuli, deubiquitinates 'Lys-48'-linked polyubiquitin chains of TRAF3, preventing TRAF3 proteolysis and over-activation of non-canonical NF…	SUBCELLULAR LOCATION: Cytoplasm {ECO:0000269|PubMed:11463333, ECO:0000269|PubMed:21888622}. Nucleus {ECO:0000269|PubMed:21888622}. Note=Shuttles be cytoplasm and the nucleus in a XPO1/CRM1-dependent manner. {ECO:0000269|PubMed:21888622}.		adaptive immune response [GO:0002250]; in utero embryonic development [GO:0001701]; mucosal immune response [GO:0002385]; negative regulation of I-kappaB kinase/NF-kappaB signaling [GO:0043124]; negative regulation of interleukin-8 production [GO:0032717]; negative regulation of protein localization to nucleus [GO:1900181]; negative regulation of transcription by RNA polymerase II [GO:0000122]; p…	cysteine-type peptidase activity [GO:0008234]; DNA binding [GO:0003677]; K63-linked polyubiquitin modification-dependent protein binding [GO:0070530]; Lys48-specific deubiquitinase activity [GO:1990380]; thiol-dependent ubiquitin-specific protease activity [GO:0004843]; thiol-dependent ubiquitinyl hydrolase activity [GO:0036459]; zinc ion binding [GO:0008270]	cytoplasm [GO:0005737]; cytosol [GO:0005829]; nucleus [GO:0005634]	GO:0000122; GO:0001701; GO:0002250; GO:0002385; GO:0003677; GO:0004843; GO:0005634; GO:0005737; GO:0005829; GO:0008234; GO:0008270; GO:0016579; GO:0032717; GO:0035871; GO:0036459; GO:0043124; GO:0070530; GO:0070536; GO:0071108; GO:0071947; GO:1900181; GO:1990380	R-HSA-5357786;R-HSA-5357905;R-HSA-5357956;R-HSA-5689896;	hsa:56957;	16.8041	16.7105	16.8049	16.8668	16.7498	17.1832	17.1895	17.1705	17.201	17.1945
LYPLA2_O95372	-0.972228	-0.986461	-0.943113	-0.687581	-1.06036	0.982583	1.0896	1.23018	0.57041	0.776969	LYPLA2	Acyl-protein thioesterase 2	O95372	1.02465	6.54142e-08	2.09501e-06	-0.44898	FUNCTION: Hydrolyzes fatty acids from S-acylated cysteine residues in proteins such as trimeric G alpha proteins, GAP43, ZDHHC6 or HRAS (PubMed:21152083, PubMed:28826475). Deacylates GAP43 (PubMed:21152083). Mediates depalmitoylation of ZDHHC6 (PubMed:28826475). Has lysophospholipase activity (By similarity). {ECO:0000250|UniProtKB:Q9WTL7, ECO:0000269|PubMed:21152083, ECO:0000269|PubMed:28826475}.	SUBCELLULAR LOCATION: Cytoplasm {ECO:0000305}.		axon guidance [GO:0007411]; fatty acid metabolic process [GO:0006631]; protein depalmitoylation [GO:0002084]	cadherin binding [GO:0045296]; carboxylic ester hydrolase activity [GO:0052689]; palmitoyl-(protein) hydrolase activity [GO:0008474]	cytoplasm [GO:0005737]; cytosol [GO:0005829]; extracellular exosome [GO:0070062]; Golgi stack [GO:0005795]	GO:0002084; GO:0005737; GO:0005795; GO:0005829; GO:0006631; GO:0007411; GO:0008474; GO:0045296; GO:0052689; GO:0070062	R-HSA-373760;	hsa:11313;	18.2015	18.198	18.2085	18.2702	18.1802	18.6734	18.6992	18.7331	18.5739	18.6237
GOLPH3_Q9H4A6	-1.07754	-0.784807	-1.11889	-1.12456	-0.553231	0.910934	0.997152	0.964045	0.734743	1.05215	GOLPH3	Golgi phosphoprotein 3	Q9H4A6	1.02154	6.58731e-08	2.10029e-06	-0.39631	FUNCTION: Phosphatidylinositol-4-phosphate-binding protein that links Golgi membranes to the cytoskeleton and may participate in the tensile force required for vesicle budding from the Golgi. Thereby, may play a role in Golgi membrane trafficking and could indirectly give its flattened shape to the Golgi apparatus. May also bind to the coatomer to regulate Golgi membrane trafficking. May play a r…	SUBCELLULAR LOCATION: Golgi apparatus, Golgi stack membrane; Peripheral membrane protein; Cytoplasmic side. Golgi apparatus, trans-Golgi network membrane; Peripheral membrane protein; Cytoplasmic side. Mitochondrion intermembrane space. Cell membrane {ECO:0000250}. Endosome {ECO:0000250}. Note=Phosphatidylinositol 4-phosphate-binding and oligomerization participate in the recruitment onto Golgi m…		asymmetric Golgi ribbon formation [GO:0090164]; cell adhesion molecule production [GO:0060352]; cell migration [GO:0016477]; cell population proliferation [GO:0008283]; gene expression [GO:0010467]; glycoprotein biosynthetic process [GO:0009101]; Golgi organization [GO:0007030]; Golgi ribbon formation [GO:0090161]; Golgi to plasma membrane protein transport [GO:0043001]; Golgi vesicle budding [GO…	enzyme binding [GO:0019899]; phosphatidylinositol-4-phosphate binding [GO:0070273]	cell [GO:0005623]; cytosol [GO:0005829]; endosome [GO:0005768]; Golgi apparatus [GO:0005794]; Golgi cisterna [GO:0031985]; Golgi cisterna membrane [GO:0032580]; intracellular membrane-bounded organelle [GO:0043231]; mitochondrial intermembrane space [GO:0005758]; mitochondrion [GO:0005739]; plasma membrane [GO:0005886]; trans-Golgi network [GO:0005802]	GO:0005623; GO:0005739; GO:0005758; GO:0005768; GO:0005794; GO:0005802; GO:0005829; GO:0005886; GO:0006890; GO:0007030; GO:0008283; GO:0009101; GO:0009306; GO:0010467; GO:0010821; GO:0016477; GO:0019899; GO:0030032; GO:0031985; GO:0032008; GO:0032580; GO:0043001; GO:0043066; GO:0043231; GO:0045053; GO:0048194; GO:0050714; GO:0050901; GO:0060352; GO:0070273; GO:0090161; GO:0090164		hsa:64083;	18.3697	18.4319	18.3609	18.3597	18.4812	18.7926	18.8109	18.8038	18.7551	18.8226
CAMK1_Q14012	-1.13297	-1.17071	-0.676468	-0.625744	-1.04767	1.11785	0.803451	1.00396	0.828877	0.89942	CAMK1	Calcium/calmodulin-dependent protein kinase type 1	Q14012	1.02724	6.81187e-08	2.16224e-06	-0.419491	FUNCTION: Calcium/calmodulin-dependent protein kinase that operates in the calcium-triggered CaMKK-CaMK1 signaling cascade and, upon calcium influx, regulates transcription activators activity, cell cycle, hormone production, cell differentiation, actin filament organization and neurite outgrowth. Recognizes the substrate consensus sequence [MVLIF]-x-R-x(2)-[ST]-x(3)-[MVLIF]. Regulates axonal ext…	SUBCELLULAR LOCATION: Cytoplasm {ECO:0000250}. Nucleus {ECO:0000250}. Note=Predominantly cytoplasmic. {ECO:0000250}.		cell cycle [GO:0007049]; negative regulation of protein binding [GO:0032091]; nucleocytoplasmic transport [GO:0006913]; positive regulation of dendritic spine development [GO:0060999]; positive regulation of muscle cell differentiation [GO:0051149]; positive regulation of neuron projection development [GO:0010976]; positive regulation of peptidyl-serine phosphorylation [GO:0033138]; positive regu…	ATP binding [GO:0005524]; calmodulin binding [GO:0005516]; calmodulin-dependent protein kinase activity [GO:0004683]	cytosol [GO:0005829]; glutamatergic synapse [GO:0098978]; nucleus [GO:0005634]; postsynaptic density [GO:0014069]	GO:0004683; GO:0005516; GO:0005524; GO:0005634; GO:0005829; GO:0006468; GO:0006913; GO:0007049; GO:0007165; GO:0010976; GO:0014069; GO:0032091; GO:0032880; GO:0033138; GO:0043393; GO:0045944; GO:0046827; GO:0051147; GO:0051149; GO:0051835; GO:0060143; GO:0060999; GO:0071902; GO:0098978; GO:1901985	R-HSA-9617324;R-HSA-9619229;	hsa:8536;	15.3542	15.3457	15.4571	15.4685	15.3734	15.8614	15.7906	15.8358	15.7963	15.8122
SRPR_P08240	-0.99217	-0.930468	-0.922759	-0.677586	-1.16526	0.870828	0.76748	0.974621	0.913788	1.16152	SRPR	Signal recognition particle receptor subunit alpha	P08240	1.01467	6.88473e-08	2.17129e-06	-0.304001	FUNCTION: Component of the SRP (signal recognition particle) receptor. Ensures, in conjunction with the signal recognition particle, the correct targeting of the nascent secretory proteins to the endoplasmic reticulum membrane system.	SUBCELLULAR LOCATION: Endoplasmic reticulum membrane; Peripheral membrane protein. Note=Thought to be anchored in the membrane through an interaction with SR-beta, which contains a bona fide transmembrane domain.		cotranslational protein targeting to membrane [GO:0006613]; IRE1-mediated unfolded protein response [GO:0036498]; protein targeting [GO:0006605]; protein targeting to ER [GO:0045047]; SRP-dependent cotranslational protein targeting to membrane [GO:0006614]	GTPase activity [GO:0003924]; GTP binding [GO:0005525]; RNA binding [GO:0003723]; signal recognition particle binding [GO:0005047]	endoplasmic reticulum membrane [GO:0005789]; extracellular exosome [GO:0070062]; membrane [GO:0016020]; signal recognition particle receptor complex [GO:0005785]	GO:0003723; GO:0003924; GO:0005047; GO:0005525; GO:0005785; GO:0005789; GO:0006605; GO:0006613; GO:0006614; GO:0016020; GO:0036498; GO:0045047; GO:0070062	R-HSA-1799339;R-HSA-381038;	hsa:6734;	20.716	20.726	20.7273	20.767	20.688	21.018	21.0013	21.0349	21.025	21.0652
TAOK3_Q9H2K8	-0.885413	-1.12272	-1.00346	-0.585938	-1.05928	0.703775	0.846829	0.918501	0.96313	1.22456	TAOK3	Serine/threonine-protein kinase TAO3	Q9H2K8	1.02069	6.93182e-08	2.17129e-06	-0.400623	FUNCTION: Serine/threonine-protein kinase that acts as a regulator of the p38/MAPK14 stress-activated MAPK cascade and of the MAPK8/JNK cascade. Acts as an activator of the p38/MAPK14 stress-activated MAPK cascade. In response to DNA damage, involved in the G2/M transition DNA damage checkpoint by activating the p38/MAPK14 stress-activated MAPK cascade, probably by mediating phosphorylation of up…	SUBCELLULAR LOCATION: Cytoplasm {ECO:0000269|PubMed:13679851}. Cell membrane {ECO:0000269|PubMed:13679851}; Peripheral membrane protein {ECO:0000269|PubMed:13679851}. Note=Also localized to the peripheral cell membrane.		activation of MAPKK activity [GO:0000186]; activation of protein kinase activity [GO:0032147]; cellular response to DNA damage stimulus [GO:0006974]; DNA repair [GO:0006281]; MAPK cascade [GO:0000165]; mitotic G2 DNA damage checkpoint [GO:0007095]; negative regulation of JNK cascade [GO:0046329]; positive regulation of JNK cascade [GO:0046330]; positive regulation of JUN kinase activity [GO:00435…	ATP binding [GO:0005524]; MAP kinase kinase kinase activity [GO:0004709]; protein kinase inhibitor activity [GO:0004860]; protein serine/threonine kinase activity [GO:0004674]; transferase activity [GO:0016740]	cytoplasm [GO:0005737]; nucleus [GO:0005634]; plasma membrane [GO:0005886]	GO:0000165; GO:0000186; GO:0004674; GO:0004709; GO:0004860; GO:0005524; GO:0005634; GO:0005737; GO:0005886; GO:0006281; GO:0006468; GO:0006974; GO:0007095; GO:0016740; GO:0023014; GO:0032147; GO:0032874; GO:0043507; GO:0046329; GO:0046330; GO:0046777		hsa:51347;	19.3735	19.3225	19.3481	19.4379	19.3361	19.7153	19.7461	19.7615	19.7711	19.8273
RSL24D1_Q9UHA3	1.15389	1.00125	0.829977	0.828616	0.82173	-0.715743	-0.875983	-0.99838	-0.671114	-1.37424	RSL24D1	Probable ribosome biogenesis protein RLP24	Q9UHA3	1.02907	6.94499e-08	2.17129e-06	0.572446	FUNCTION: Involved in the biogenesis of the 60S ribosomal subunit. Ensures the docking of GTPBP4/NOG1 to pre-60S particles (By similarity). {ECO:0000250}.	SUBCELLULAR LOCATION: Nucleus, nucleolus {ECO:0000269|PubMed:12429849}.		assembly of large subunit precursor of preribosome [GO:1902626]; ribosomal large subunit assembly [GO:0000027]; translation [GO:0006412]	RNA binding [GO:0003723]; structural constituent of ribosome [GO:0003735]	cytosolic large ribosomal subunit [GO:0022625]; nucleolus [GO:0005730]; nucleoplasm [GO:0005654]	GO:0000027; GO:0003723; GO:0003735; GO:0005654; GO:0005730; GO:0006412; GO:0022625; GO:1902626		hsa:51187;	20.3335	20.2864	20.2335	20.2331	20.2309	19.7563	19.7068	19.669	19.7701	19.553
MRS2_Q9HD23	-1.01644	-0.744885	-1.10278	-0.676811	-1.0877	1.23218	0.871185	0.81558	0.580278	1.12941	MRS2	Magnesium transporter MRS2 homolog, mitochondrial	Q9HD23	1.04589	6.96198e-08	2.17129e-06	-0.70165	FUNCTION: Magnesium transporter that mediates the influx of magnesium into the mitochondrial matrix (PubMed:11401429, PubMed:18384665). Required for normal expression of the mitochondrial respiratory complex I subunits (PubMed:18384665). {ECO:0000269|PubMed:11401429, ECO:0000269|PubMed:18384665}.	SUBCELLULAR LOCATION: Mitochondrion inner membrane {ECO:0000269|PubMed:11401429, ECO:0000305|PubMed:18384665}; Multi-pass membrane protein {ECO:0000305}.		lactate metabolic process [GO:0006089]; magnesium ion transport [GO:0015693]; mitochondrial magnesium ion transmembrane transport [GO:0045016]; transmembrane transport [GO:0055085]	magnesium ion transmembrane transporter activity [GO:0015095]	integral component of membrane [GO:0016021]; mitochondrial inner membrane [GO:0005743]; mitochondrion [GO:0005739]	GO:0005739; GO:0005743; GO:0006089; GO:0015095; GO:0015693; GO:0016021; GO:0045016; GO:0055085	R-HSA-5223345;	hsa:57380;	15.255	15.3579	15.2223	15.3837	15.228	16.1072	15.9704	15.9493	15.8601	16.0682
SSRP1_Q08945	-0.956397	-0.80493	-1.15723	-0.700459	-1.05396	0.819735	0.99673	1.10357	1.07274	0.680199	SSRP1	FACT complex subunit SSRP1	Q08945	1.01579	7.04786e-08	2.18851e-06	-0.339413	FUNCTION: Component of the FACT complex, a general chromatin factor that acts to reorganize nucleosomes. The FACT complex is involved in multiple processes that require DNA as a template such as mRNA elongation, DNA replication and DNA repair. During transcription elongation the FACT complex acts as a histone chaperone that both destabilizes and restores nucleosomal structure. It facilitates the …	SUBCELLULAR LOCATION: Nucleus {ECO:0000269|PubMed:10421373, ECO:0000269|PubMed:22002106}. Nucleus, nucleolus {ECO:0000269|PubMed:22002106}. Chromosome {ECO:0000269|PubMed:10421373}. Note=Colocalizes with RNA polymerase II on chromatin. Recruited to actively transcribed loci. {ECO:0000250|UniProtKB:Q05344}.		DNA repair [GO:0006281]; DNA replication [GO:0006260]; regulation of signal transduction by p53 class mediator [GO:1901796]; transcription by RNA polymerase II [GO:0006366]; transcription elongation from RNA polymerase II promoter [GO:0006368]	DNA binding [GO:0003677]; histone binding [GO:0042393]; nucleosome binding [GO:0031491]; RNA binding [GO:0003723]	FACT complex [GO:0035101]; nuclear chromatin [GO:0000790]; nucleolus [GO:0005730]; nucleoplasm [GO:0005654]	GO:0000790; GO:0003677; GO:0003723; GO:0005654; GO:0005730; GO:0006260; GO:0006281; GO:0006366; GO:0006368; GO:0031491; GO:0035101; GO:0042393; GO:1901796	R-HSA-112382;R-HSA-167152;R-HSA-167200;R-HSA-167238;R-HSA-167243;R-HSA-167246;R-HSA-167287;R-HSA-167290;R-HSA-674695;R-HSA-6796648;R-HSA-6804756;R-HSA-75955;	hsa:6749;	21.4873	21.5148	21.4508	21.5338	21.4696	21.8098	21.8419	21.8613	21.8557	21.7845
ACAT1_P24752	-0.951274	-0.960119	-0.969375	-0.652348	-1.14766	1.19431	0.961303	0.931862	0.7598	0.833499	ACAT1	Acetyl-CoA acetyltransferase, mitochondrial	P24752	1.01465	7.10324e-08	2.19616e-06	-0.318573	FUNCTION: This is one of the enzymes that catalyzes the last step of the mitochondrial beta-oxidation pathway, an aerobic process breaking down fatty acids into acetyl-CoA (PubMed:1715688, PubMed:7728148, PubMed:9744475). Using free coenzyme A/CoA, catalyzes the thiolytic cleavage of medium- to long-chain 3-oxoacyl-CoAs into acetyl-CoA and a fatty acyl-CoA shortened by two carbon atoms (PubMed:17…	SUBCELLULAR LOCATION: Mitochondrion {ECO:0000269|PubMed:1979337}.	DISEASE: 3-ketothiolase deficiency (3KTD) [MIM:203750]: An autosomal recessive inborn error of isoleucine catabolism characterized by intermittent ketoacidotic attacks associated with unconsciousness. Some patients die during an attack or are mentally retarded. Urinary excretion of 2-methyl-3-hydroxybutyric acid, 2-methylacetoacetic acid, triglylglycine, butanone is increased. It seems likely tha…	acetyl-CoA biosynthetic process [GO:0006085]; acetyl-CoA catabolic process [GO:0046356]; adipose tissue development [GO:0060612]; brain development [GO:0007420]; branched-chain amino acid catabolic process [GO:0009083]; cholesterol esterification [GO:0034435]; coenzyme A biosynthetic process [GO:0015937]; coenzyme A metabolic process [GO:0015936]; fatty acid beta-oxidation [GO:0006635]; isoleucin…	acetyl-CoA C-acetyltransferase activity [GO:0003985]; acetyl-CoA C-acyltransferase activity [GO:0003988]; C-acetyltransferase activity [GO:0016453]; coenzyme binding [GO:0050662]; enzyme binding [GO:0019899]; metal ion binding [GO:0046872]; protein homodimerization activity [GO:0042803]	extracellular exosome [GO:0070062]; mitochondrial matrix [GO:0005759]; mitochondrion [GO:0005739]	GO:0001889; GO:0003985; GO:0003988; GO:0005739; GO:0005759; GO:0006085; GO:0006550; GO:0006635; GO:0007420; GO:0009083; GO:0009725; GO:0014070; GO:0015936; GO:0015937; GO:0016453; GO:0019899; GO:0034435; GO:0042594; GO:0042803; GO:0046356; GO:0046872; GO:0046951; GO:0046952; GO:0050662; GO:0051260; GO:0060612; GO:0070062; GO:0072229; GO:1902224; GO:1902860	R-HSA-70895;R-HSA-77108;R-HSA-77111;	hsa:38;	21.7367	21.7352	21.7337	21.7876	21.7033	22.1018	22.0622	22.0571	22.0279	22.0404
CD47_Q08722	-0.883748	-1.23496	-1.00699	-0.471977	-1.02366	0.837067	0.850983	0.935976	0.760238	1.23707	CD47	Leukocyte surface antigen CD47	Q08722	1.05661	7.14589e-08	2.19983e-06	-0.987028	FUNCTION: Has a role in both cell adhesion by acting as an adhesion receptor for THBS1 on platelets, and in the modulation of integrins. Plays an important role in memory formation and synaptic plasticity in the hippocampus (By similarity). Receptor for SIRPA, binding to which prevents maturation of immature dendritic cells and inhibits cytokine production by mature dendritic cells. Interaction w…	SUBCELLULAR LOCATION: Cell membrane {ECO:0000269|PubMed:7691831}; Multi-pass membrane protein {ECO:0000269|PubMed:7691831}.		cell migration [GO:0016477]; cellular response to interferon-gamma [GO:0071346]; cellular response to interleukin-1 [GO:0071347]; cellular response to interleukin-12 [GO:0071349]; extracellular matrix organization [GO:0030198]; integrin-mediated signaling pathway [GO:0007229]; leukocyte migration [GO:0050900]; monocyte extravasation [GO:0035696]; negative regulation of Fc-gamma receptor signaling…	cell-cell adhesion mediator activity [GO:0098632]; protein binding involved in heterotypic cell-cell adhesion [GO:0086080]; thrombospondin receptor activity [GO:0070053]	cell surface [GO:0009986]; extracellular exosome [GO:0070062]; integral component of plasma membrane [GO:0005887]; plasma membrane [GO:0005886]; specific granule membrane [GO:0035579]; tertiary granule membrane [GO:0070821]	GO:0005886; GO:0005887; GO:0007229; GO:0008228; GO:0008284; GO:0009617; GO:0009986; GO:0016477; GO:0022409; GO:0030198; GO:0032649; GO:0032653; GO:0032655; GO:0032675; GO:0032680; GO:0035579; GO:0035696; GO:0043312; GO:0045428; GO:0050729; GO:0050766; GO:0050870; GO:0050900; GO:0051496; GO:0070053; GO:0070062; GO:0070821; GO:0071346; GO:0071347; GO:0071349; GO:0086080; GO:0098632; GO:1905450	R-HSA-202733;R-HSA-216083;R-HSA-391160;R-HSA-6798695;	hsa:961;	17.4581	17.2706	17.3923	17.678	17.3834	18.3769	18.3844	18.4297	18.3359	18.5905
SERPINB8_P50452	-0.902689	-0.80225	-0.721547	-1.13186	-1.07819	0.872838	0.820403	0.73668	0.815972	1.39065	SERPINB8	Serpin B8	P50452	1.02994	7.37353e-08	2.24708e-06	-0.538844	FUNCTION: Has an important role in epithelial desmosome-mediated cell-cell adhesion. {ECO:0000269|PubMed:27476651}.	SUBCELLULAR LOCATION: Cytoplasm.	DISEASE: Peeling skin syndrome 5 (PSS5) [MIM:617115]: A form of peeling skin syndrome, a genodermatosis characterized by generalized, continuous shedding of the outer layers of the epidermis. Two main PSS subtypes have been suggested. Patients with non-inflammatory PSS (type A) manifest white scaling, with painless and easy removal of the skin, irritation when in contact with water, dust and sand…	epithelial cell-cell adhesion [GO:0090136]; negative regulation of endopeptidase activity [GO:0010951]	serine-type endopeptidase inhibitor activity [GO:0004867]	collagen-containing extracellular matrix [GO:0062023]; cytoplasm [GO:0005737]; cytosol [GO:0005829]; extracellular exosome [GO:0070062]; extracellular space [GO:0005615]	GO:0004867; GO:0005615; GO:0005737; GO:0005829; GO:0010951; GO:0062023; GO:0070062; GO:0090136	R-HSA-75205;	hsa:5271;	18.0044	18.0336	18.0571	17.9378	17.9534	18.5203	18.5051	18.4807	18.5038	18.6707
PSME2_A0A087X1Z3	-1.15643	-1.01321	-0.679449	-0.737091	-1.06241	0.945323	0.757201	0.979045	0.716758	1.25026	PSME2	Proteasome activator complex subunit 2	A0A087X1Z3	1.02193	7.39726e-08	2.24708e-06	-0.436024						proteasome activator complex [GO:0008537]	GO:0008537			19.8283	19.8619	19.9402	19.9267	19.8504	20.3212	20.2771	20.3291	20.2676	20.3927
ATP5S_Q99766	-0.771204	-0.857378	-1.13332	-0.983627	-0.895847	0.589232	0.780756	0.942314	1.33574	0.993339	ATP5S	ATP synthase subunit s, mitochondrial	Q99766	1.02699	7.41828e-08	2.24708e-06	-0.488289	FUNCTION: Involved in regulation of mitochondrial membrane ATP synthase. Necessary for H(+) conduction of ATP synthase. Facilitates energy-driven catalysis of ATP synthesis by blocking a proton leak through an alternative proton exit pathway. {ECO:0000250|UniProtKB:P22027}.	SUBCELLULAR LOCATION: Mitochondrion {ECO:0000250|UniProtKB:P22027}. Mitochondrion inner membrane {ECO:0000250|UniProtKB:P22027}.		ATP biosynthetic process [GO:0006754]; cristae formation [GO:0042407]; mitochondrial ATP synthesis coupled proton transport [GO:0042776]; proton transmembrane transport [GO:1902600]	metal ion binding [GO:0046872]; proton transmembrane transporter activity [GO:0015078]	mitochondrial inner membrane [GO:0005743]; proton-transporting ATP synthase complex, coupling factor F(o) [GO:0045263]	GO:0005743; GO:0006754; GO:0015078; GO:0042407; GO:0042776; GO:0045263; GO:0046872; GO:1902600	R-HSA-163210;R-HSA-8949613;	hsa:27109;	18.1321	18.1094	18.0368	18.0762	18.0993	18.4899	18.5402	18.5827	18.6862	18.5962
MVP_Q14764	-1.04262	-0.86314	-0.998057	-0.928964	-0.865816	0.781979	0.769094	0.878999	1.06191	1.20662	MVP	Major vault protein	Q14764	1.01344	7.42525e-08	2.24708e-06	-0.281586	FUNCTION: Required for normal vault structure. Vaults are multi-subunit structures that may act as scaffolds for proteins involved in signal transduction. Vaults may also play a role in nucleo-cytoplasmic transport. Down-regulates IFNG-mediated STAT1 signaling and subsequent activation of JAK. Down-regulates SRC activity and signaling through MAP kinases. {ECO:0000269|PubMed:15133037, ECO:0000269…	SUBCELLULAR LOCATION: Cytoplasm {ECO:0000269|PubMed:15133037, ECO:0000269|PubMed:16441665}. Nucleus, nuclear pore complex {ECO:0000269|PubMed:16441665}. Cytoplasm, perinuclear region {ECO:0000269|PubMed:16441665}. Note=5% found in the nuclear pore complex (PubMed:15133037). Translocates from the nucleus to the cytoplasm upon EGF treatment (PubMed:16441665).		ERBB signaling pathway [GO:0038127]; mRNA transport [GO:0051028]; negative regulation of protein autophosphorylation [GO:0031953]; negative regulation of protein tyrosine kinase activity [GO:0061099]; negative regulation of signaling [GO:0023057]; neutrophil degranulation [GO:0043312]; protein transport [GO:0015031]	identical protein binding [GO:0042802]; protein kinase binding [GO:0019901]; protein phosphatase binding [GO:0019903]	cytoplasm [GO:0005737]; cytoskeleton [GO:0005856]; cytosol [GO:0005829]; extracellular exosome [GO:0070062]; extracellular region [GO:0005576]; ficolin-1-rich granule lumen [GO:1904813]; membrane [GO:0016020]; nuclear pore [GO:0005643]; nucleus [GO:0005634]; perinuclear region of cytoplasm [GO:0048471]; secretory granule lumen [GO:0034774]	GO:0005576; GO:0005634; GO:0005643; GO:0005737; GO:0005829; GO:0005856; GO:0015031; GO:0016020; GO:0019901; GO:0019903; GO:0023057; GO:0031953; GO:0034774; GO:0038127; GO:0042802; GO:0043312; GO:0048471; GO:0051028; GO:0061099; GO:0070062; GO:1904813	R-HSA-6798695;	hsa:9961;	20.9312	20.9581	20.9379	20.9482	20.9577	21.2046	21.2026	21.2191	21.2465	21.2682
FAM118B_G3V179	-0.783916	-1.14498	-0.862122	-0.828264	-1.04898	0.935065	0.998093	0.778243	0.700908	1.25595	FAM118B	Protein FAM118B	G3V179	1.01958	7.63975e-08	2.29248e-06	-0.347116				Cajal body organization [GO:0030576]			GO:0030576			17.7536	17.6865	17.7391	17.7453	17.7043	18.0731	18.0849	18.044	18.0296	18.1328
GSKIP_Q9P0R6	-1.19828	-0.800008	-0.984857	-0.994614	-0.661449	0.764047	0.759051	0.743893	1.17197	1.20024	GSKIP	GSK3-beta interaction protein	Q9P0R6	1.0315	7.65859e-08	2.29248e-06	-0.500494	FUNCTION: A-kinase anchoring protein for GSK3B and PKA that regulates or facilitates their kinase activity towards their targets (PubMed:27484798, PubMed:25920809, PubMed:16981698). The ternary complex enhances Wnt-induced signaling by facilitating the GSK3B- and PKA-induced phosphorylation of beta-catenin leading to beta-catenin degradation and stabilization respectively (PubMed:27484798, PubMed…	SUBCELLULAR LOCATION: Cytoplasm {ECO:0000269|PubMed:16981698, ECO:0000269|PubMed:20007971}. Nucleus {ECO:0000269|PubMed:20007971}.		intrinsic apoptotic signaling pathway in response to oxidative stress [GO:0008631]; negative regulation of protein kinase activity [GO:0006469]; positive regulation of canonical Wnt signaling pathway [GO:0090263]; regulation of Wnt signaling pathway [GO:0030111]	protein kinase A binding [GO:0051018]; protein kinase A regulatory subunit binding [GO:0034237]; protein kinase binding [GO:0019901]; protein kinase inhibitor activity [GO:0004860]	cytoplasm [GO:0005737]; nucleus [GO:0005634]	GO:0004860; GO:0005634; GO:0005737; GO:0006469; GO:0008631; GO:0019901; GO:0030111; GO:0034237; GO:0051018; GO:0090263		hsa:51527;	15.8165	15.9239	15.8741	15.8714	15.9613	16.3457	16.3444	16.3403	16.4558	16.4634
RPL21_P46778	1.12426	1.04511	0.879334	0.71378	0.891157	-0.571327	-0.903575	-0.944906	-0.982366	-1.25147	RPL21	60S ribosomal protein L21	P46778	1.01866	7.67983e-08	2.29248e-06	0.40298	FUNCTION: Component of the large ribosomal subunit. {ECO:0000269|PubMed:23636399, ECO:0000269|PubMed:25901680, ECO:0000269|PubMed:25957688, ECO:0000305|PubMed:12962325}.	SUBCELLULAR LOCATION: Cytoplasm, cytosol {ECO:0000269|PubMed:25957688}. Cytoplasm {ECO:0000305|PubMed:23636399, ECO:0000305|PubMed:25901680}. Endoplasmic reticulum {ECO:0000250|UniProtKB:P49666}. Note=Detected on cytosolic polysomes (PubMed:25957688). Detected in ribosomes that are associated with the rough endoplasmic reticulum (By similarity). {ECO:0000250|UniProtKB:P49666, ECO:0000269|PubMed:2…	DISEASE: Hypotrichosis 12 (HYPT12) [MIM:615885]: A form of hypotrichosis, a condition characterized by the presence of less than the normal amount of hair and abnormal hair follicles and shafts, which are thin and atrophic. The extent of scalp and body hair involvement can be very variable, within as well as between families. HYPT12 patients have normal scalp hair density at birth. Hair loss begi…	nuclear-transcribed mRNA catabolic process, nonsense-mediated decay [GO:0000184]; SRP-dependent cotranslational protein targeting to membrane [GO:0006614]; translation [GO:0006412]; translational initiation [GO:0006413]; viral transcription [GO:0019083]	RNA binding [GO:0003723]; structural constituent of ribosome [GO:0003735]	cytosol [GO:0005829]; cytosolic large ribosomal subunit [GO:0022625]; endoplasmic reticulum [GO:0005783]; membrane [GO:0016020]	GO:0000184; GO:0003723; GO:0003735; GO:0005783; GO:0005829; GO:0006412; GO:0006413; GO:0006614; GO:0016020; GO:0019083; GO:0022625	R-HSA-156827;R-HSA-156902;R-HSA-1799339;R-HSA-192823;R-HSA-2408557;R-HSA-6791226;R-HSA-72689;R-HSA-72706;R-HSA-72764;R-HSA-9010553;R-HSA-975956;R-HSA-975957;	hsa:6144;	22.0368	22.0197	21.9838	21.9479	21.9863	21.6697	21.5978	21.5889	21.5808	21.5225
EED_O75530	-1.11198	-1.09199	-0.725557	-0.836849	-0.907979	0.662759	0.899605	1.09621	0.870089	1.14569	EED	Polycomb protein EED	O75530	1.01728	7.70366e-08	2.29248e-06	-0.329186	FUNCTION: Polycomb group (PcG) protein. Component of the PRC2/EED-EZH2 complex, which methylates 'Lys-9' and 'Lys-27' of histone H3, leading to transcriptional repression of the affected target gene. Also recognizes 'Lys-26' trimethylated histone H1 with the effect of inhibiting PRC2 complex methyltransferase activity on nucleosomal histone H3 'Lys-27', whereas H3 'Lys-27' recognition has the opp…	SUBCELLULAR LOCATION: Nucleus. Chromosome. Note=Transiently colocalizes with XIST at inactive X chromosomes.	DISEASE: Cohen-Gibson syndrome (COGIS) [MIM:617561]: An autosomal dominant overgrowth disorder characterized by accelerated osseous maturation, advanced bone age, skeletal abnormalities including flaring of the metaphyses of the long bones, large hands with long fingers and camptodactyly, scoliosis, cervical spine anomalies, dysmorphic facial features, and variable intellectual disability. {ECO:0…	cellular response to leukemia inhibitory factor [GO:1990830]; chromatin silencing [GO:0006342]; histone H3-K27 methylation [GO:0070734]; negative regulation of G0 to G1 transition [GO:0070317]; negative regulation of gene expression, epigenetic [GO:0045814]; negative regulation of transcription, DNA-templated [GO:0045892]; negative regulation of transcription by RNA polymerase II [GO:0000122]; po…	chromatin binding [GO:0003682]; histone methyltransferase activity [GO:0042054]; identical protein binding [GO:0042802]; RNA polymerase II proximal promoter sequence-specific DNA binding [GO:0000978]	cytosol [GO:0005829]; ESC/E(Z) complex [GO:0035098]; nucleoplasm [GO:0005654]; nucleus [GO:0005634]; pronucleus [GO:0045120]; sex chromatin [GO:0001739]	GO:0000122; GO:0000978; GO:0001739; GO:0003682; GO:0005634; GO:0005654; GO:0005829; GO:0006342; GO:0006349; GO:0021510; GO:0035098; GO:0042054; GO:0042802; GO:0045120; GO:0045814; GO:0045892; GO:0061087; GO:0070317; GO:0070734; GO:1990830; GO:2000011	R-HSA-212300;R-HSA-2559580;R-HSA-3214841;R-HSA-5617472;R-HSA-8943724;R-HSA-8953750;	hsa:8726;	19.0173	19.0208	19.0853	19.0657	19.0532	19.3297	19.3714	19.406	19.3662	19.4147
PCBP2_F8VZX2	-0.845096	-1.09086	-0.872446	-0.641222	-1.17648	1.01389	0.882805	1.1073	0.502552	1.11956	PCBP2		F8VZX2	1.04192	7.83803e-08	2.32279e-06	-0.688507					RNA binding [GO:0003723]		GO:0003723			16.4551	16.3636	16.4449	16.5309	16.3318	17.1467	17.098	17.1815	16.9565	17.1861
C14orf159_H0YB09	-1.03245	-0.691911	-0.950812	-0.682901	-1.2763	0.768071	1.18168	0.906906	0.705789	1.07193	C14orf159		H0YB09	1.03285	7.96928e-08	2.35193e-06	-0.5405										16.4209	16.5202	16.4447	16.5228	16.3498	16.9459	17.0665	16.9864	16.9277	17.0345
FAM213A_Q9BRX8	-0.81083	-1.06484	-1.15326	-0.496472	-1.10356	0.857646	0.745111	0.90874	0.891437	1.22602	FAM213A	Redox-regulatory protein FAM213A	Q9BRX8	1.03218	8.06778e-08	2.3712e-06	-0.613813	FUNCTION: Involved in redox regulation of the cell (PubMed:26438880, PubMed:19951071). Acts as an antioxidant (PubMed:19951071, PubMed:26438880). Inhibits TNFSF11-induced NFKB1 and JUN activation and osteoclast differentiation (PubMed:19951071). May affect bone resorption and help to maintain bone mass (PubMed:19951071). Acts as a negative regulator of macrophage-mediated inflammation by inhibiti…	SUBCELLULAR LOCATION: Cytoplasm {ECO:0000269|PubMed:19951071}. Secreted {ECO:0000269|PubMed:26438880}. Note=Secreted from mature adipocytes but not from preadipocytes. {ECO:0000269|PubMed:26438880}.		oxidation-reduction process [GO:0055114]; regulation of osteoclast differentiation [GO:0045670]	antioxidant activity [GO:0016209]	cytoplasm [GO:0005737]; extracellular region [GO:0005576]	GO:0005576; GO:0005737; GO:0016209; GO:0045670; GO:0055114		hsa:84293;	19.1099	19.0257	18.9964	19.2141	19.0129	19.663	19.6257	19.68	19.6742	19.7852
MAPK13_O15264	-1.07016	-0.950524	-0.938803	-0.672808	-0.991836	0.881584	0.821075	0.905058	0.601972	1.41444	MAPK13	Mitogen-activated protein kinase 13	O15264	1.03969	8.30815e-08	2.43184e-06	-0.699987	FUNCTION: Serine/threonine kinase which acts as an essential component of the MAP kinase signal transduction pathway. MAPK13 is one of the four p38 MAPKs which play an important role in the cascades of cellular responses evoked by extracellular stimuli such as proinflammatory cytokines or physical stress leading to direct activation of transcription factors such as ELK1 and ATF2. Accordingly, p38…			cell cycle [GO:0007049]; cellular response to anisomycin [GO:0072740]; cellular response to hydrogen peroxide [GO:0070301]; cellular response to interleukin-1 [GO:0071347]; cellular response to sodium arsenite [GO:1903936]; cellular response to sorbitol [GO:0072709]; cellular response to UV [GO:0034644]; intracellular signal transduction [GO:0035556]; peptidyl-serine phosphorylation [GO:0018105];…	ATP binding [GO:0005524]; MAP kinase activity [GO:0004707]; protein serine/threonine kinase activity [GO:0004674]	cytoplasm [GO:0005737]; cytosol [GO:0005829]; nucleus [GO:0005634]	GO:0004674; GO:0004707; GO:0005524; GO:0005634; GO:0005737; GO:0005829; GO:0006970; GO:0007049; GO:0010468; GO:0018105; GO:0032755; GO:0034644; GO:0035556; GO:0050729; GO:0051403; GO:0070301; GO:0071347; GO:0072709; GO:0072740; GO:1903936	R-HSA-168638;R-HSA-171007;R-HSA-376172;R-HSA-4420097;	hsa:5603;	17.5826	17.6279	17.6323	17.733	17.6122	18.3212	18.2983	18.3301	18.2154	18.5229
PRPF40A_O75400	-0.815847	-0.93608	-1.32229	-0.568571	-1.00203	0.810491	0.967184	1.13612	0.842846	0.888175	PRPF40A	Pre-mRNA-processing factor 40 homolog A	O75400	1.02114	8.49111e-08	2.47525e-06	-0.436835	FUNCTION: Binds to WASL/N-WASP and suppresses its translocation from the nucleus to the cytoplasm, thereby inhibiting its cytoplasmic function (By similarity). Plays a role in the regulation of cell morphology and cytoskeletal organization. Required in the control of cell shape and migration. May play a role in cytokinesis. May be involved in pre-mRNA splicing. {ECO:0000250, ECO:0000269|PubMed:21…	SUBCELLULAR LOCATION: Nucleus speckle {ECO:0000250}. Nucleus matrix {ECO:0000269|PubMed:16391387}. Note=Colocalizes with AKAP8L in the nuclear matrix. {ECO:0000250}.		cell cycle [GO:0007049]; cell division [GO:0051301]; cell migration [GO:0016477]; cytoskeleton organization [GO:0007010]; mRNA cis splicing, via spliceosome [GO:0045292]; mRNA splicing, via spliceosome [GO:0000398]; regulation of cell shape [GO:0008360]; regulation of cytokinesis [GO:0032465]	proline-rich region binding [GO:0070064]; RNA binding [GO:0003723]	cytosol [GO:0005829]; membrane [GO:0016020]; nuclear matrix [GO:0016363]; nuclear speck [GO:0016607]; nucleoplasm [GO:0005654]; U1 snRNP [GO:0005685]; U2-type prespliceosome [GO:0071004]	GO:0000398; GO:0003723; GO:0005654; GO:0005685; GO:0005829; GO:0007010; GO:0007049; GO:0008360; GO:0016020; GO:0016363; GO:0016477; GO:0016607; GO:0032465; GO:0045292; GO:0051301; GO:0070064; GO:0071004	R-HSA-72163;	hsa:55660;	20.6927	20.6644	20.5736	20.7508	20.6489	21.075	21.1119	21.1516	21.0827	21.0933
ARHGAP5_Q13017	-0.872413	-0.942872	-0.953352	-0.678239	-1.1887	0.880703	0.980825	0.8531	0.601648	1.3193	ARHGAP5	Rho GTPase-activating protein 5	Q13017	1.02824	8.55196e-08	2.4814e-06	-0.507399	FUNCTION: GTPase-activating protein for Rho family members (PubMed:8537347). {ECO:0000269|PubMed:8537347}.	SUBCELLULAR LOCATION: Cytoplasm {ECO:0000269|PubMed:8537347}. Cell membrane {ECO:0000269|PubMed:8537347}; Peripheral membrane protein {ECO:0000269|PubMed:8537347}. Note=Also membrane-associated in a fibrillar pattern that colocalizes with the alpha5-beta1 integrin receptor (ITGA5/ITGB1) for fibronectin. {ECO:0000269|PubMed:8537347}.		cell adhesion [GO:0007155]; mammary gland development [GO:0030879]; regulation of small GTPase mediated signal transduction [GO:0051056]; Rho protein signal transduction [GO:0007266]	GTPase activator activity [GO:0005096]; GTPase activity [GO:0003924]; GTP binding [GO:0005525]; SH2 domain binding [GO:0042169]	cytoplasm [GO:0005737]; cytosol [GO:0005829]; endoplasmic reticulum [GO:0005783]; plasma membrane [GO:0005886]	GO:0003924; GO:0005096; GO:0005525; GO:0005737; GO:0005783; GO:0005829; GO:0005886; GO:0007155; GO:0007266; GO:0030879; GO:0042169; GO:0051056	R-HSA-194840;	hsa:394;	17.9852	17.9659	17.9631	18.0383	17.8987	18.4649	18.4923	18.4574	18.3886	18.585
TLK1_Q9UKI8	1.04165	0.939365	0.856913	0.924312	0.855576	-0.725616	-0.446531	-1.03502	-1.13788	-1.27277	TLK1	Serine/threonine-protein kinase tousled-like 1	Q9UKI8	1.06472	8.58172e-08	2.4814e-06	0.908365	FUNCTION: Rapidly and transiently inhibited by phosphorylation following the generation of DNA double-stranded breaks during S-phase. This is cell cycle checkpoint and ATM-pathway dependent and appears to regulate processes involved in chromatin assembly. Isoform 3 phosphorylates and enhances the stability of the t-SNARE SNAP23, augmenting its assembly with syntaxin. Isoform 3 protects the cells …	SUBCELLULAR LOCATION: Nucleus {ECO:0000269|PubMed:10523312, ECO:0000269|PubMed:10588641, ECO:0000269|PubMed:11314006, ECO:0000269|PubMed:9427565}.		cell cycle [GO:0007049]; cellular response to DNA damage stimulus [GO:0006974]; chromatin organization [GO:0006325]; chromosome segregation [GO:0007059]; intracellular protein transport [GO:0006886]; intracellular signal transduction [GO:0035556]; peptidyl-serine phosphorylation [GO:0018105]; protein phosphorylation [GO:0006468]; regulation of chromatin assembly or disassembly [GO:0001672]	ATP binding [GO:0005524]; protein serine/threonine kinase activity [GO:0004674]	nucleoplasm [GO:0005654]; nucleus [GO:0005634]	GO:0001672; GO:0004674; GO:0005524; GO:0005634; GO:0005654; GO:0006325; GO:0006468; GO:0006886; GO:0006974; GO:0007049; GO:0007059; GO:0018105; GO:0035556		hsa:9874;	15.0012	14.9509	14.9104	14.9435	14.9097	14.1321	14.2694	13.98	13.9294	13.8631
TRA2B_P62995	-0.913557	-0.919371	-1.05038	-0.622122	-1.12364	0.576818	0.839938	0.875896	1.04086	1.29556	TRA2B	Transformer-2 protein homolog beta	P62995	1.0287	8.76398e-08	2.52389e-06	-0.577209	FUNCTION: Sequence-specific RNA-binding protein which participates in the control of pre-mRNA splicing. Can either activate or suppress exon inclusion. Acts additively with RBMX to promote exon 7 inclusion of the survival motor neuron SMN2. Activates the splicing of MAPT/Tau exon 10. Alters pre-mRNA splicing patterns by antagonizing the effects of splicing regulators, like RBMX. Binds to the AG-r…	SUBCELLULAR LOCATION: Nucleus {ECO:0000269|PubMed:9212162, ECO:0000269|PubMed:9546399}.		cellular response to glucose stimulus [GO:0071333]; cerebral cortex regionalization [GO:0021796]; embryonic brain development [GO:1990403]; mRNA splicing, via spliceosome [GO:0000398]; positive regulation of mRNA splicing, via spliceosome [GO:0048026]; protein complex oligomerization [GO:0051259]; regulation of alternative mRNA splicing, via spliceosome [GO:0000381]; regulation of RNA splicing [G…	identical protein binding [GO:0042802]; mRNA binding [GO:0003729]; pre-mRNA binding [GO:0036002]; protein domain specific binding [GO:0019904]; RNA binding [GO:0003723]	cell [GO:0005623]; nuclear inner membrane [GO:0005637]; nucleoplasm [GO:0005654]; nucleus [GO:0005634]; ribonucleoprotein complex [GO:1990904]; spliceosomal complex [GO:0005681]	GO:0000375; GO:0000381; GO:0000398; GO:0003723; GO:0003729; GO:0005623; GO:0005634; GO:0005637; GO:0005654; GO:0005681; GO:0019904; GO:0021796; GO:0036002; GO:0042802; GO:0043484; GO:0048026; GO:0051259; GO:0071333; GO:1990403; GO:1990904	R-HSA-72163;	hsa:6434;	20.1136	20.1117	20.0709	20.2044	20.0481	20.5781	20.6602	20.6714	20.7228	20.8022
YTHDF1_Q9BYJ9	-0.915936	-0.87223	-0.989201	-0.912353	-0.934417	0.631036	0.842907	0.802885	0.851175	1.49613	YTHDF1	YTH domain-containing family protein 1	Q9BYJ9	1.03765	8.84258e-08	2.53192e-06	-0.660632	FUNCTION: Specifically recognizes and binds N6-methyladenosine (m6A)-containing mRNAs, and promotes mRNA translation efficiency (PubMed:24284625, PubMed:26046440, PubMed:26318451). M6A is a modification present at internal sites of mRNAs and some non-coding RNAs and plays a role in the efficiency of mRNA splicing, processing and stability (PubMed:24284625). Acts as a regulator of mRNA translation…	SUBCELLULAR LOCATION: Cytoplasm {ECO:0000303|PubMed:26046440}.		immune system process [GO:0002376]; learning [GO:0007612]; memory [GO:0007613]; positive regulation of translation [GO:0045727]; positive regulation of translational initiation [GO:0045948]; regulation of antigen processing and presentation [GO:0002577]; regulation of axon guidance [GO:1902667]; regulation of long-term synaptic potentiation [GO:1900271]	N6-methyladenosine-containing RNA binding [GO:1990247]; ribosome binding [GO:0043022]; RNA binding [GO:0003723]	cytoplasm [GO:0005737]	GO:0002376; GO:0002577; GO:0003723; GO:0005737; GO:0007612; GO:0007613; GO:0043022; GO:0045727; GO:0045948; GO:1900271; GO:1902667; GO:1990247		hsa:54915;	17.5484	17.564	17.5222	17.5496	17.5418	18.1009	18.1766	18.1623	18.1795	18.4099
ICAM1_P05362	-0.82771	-0.896974	-0.623894	-0.997765	-1.28197	0.98089	1.13332	1.01546	0.951088	0.547549	ICAM1	Intercellular adhesion molecule 1	P05362	1.03288	8.8628e-08	2.53192e-06	-0.583976	FUNCTION: ICAM proteins are ligands for the leukocyte adhesion protein LFA-1 (integrin alpha-L/beta-2). During leukocyte trans-endothelial migration, ICAM1 engagement promotes the assembly of endothelial apical cups through ARHGEF26/SGEF and RHOG activation. {ECO:0000269|PubMed:11173916, ECO:0000269|PubMed:17875742}.; FUNCTION: (Microbial infection) Acts as a receptor for major receptor group rhi…	SUBCELLULAR LOCATION: Membrane; Single-pass type I membrane protein.		acute inflammatory response to antigenic stimulus [GO:0002438]; adhesion of symbiont to host [GO:0044406]; cell adhesion [GO:0007155]; cell adhesion mediated by integrin [GO:0033627]; cell aging [GO:0007569]; cellular response to alkaloid [GO:0071312]; cellular response to amyloid-beta [GO:1904646]; cellular response to dexamethasone stimulus [GO:0071549]; cellular response to glucose stimulus [G…	integrin binding [GO:0005178]; signaling receptor activity [GO:0038023]; transmembrane signaling receptor activity [GO:0004888]; virus receptor activity [GO:0001618]	cell [GO:0005623]; cell surface [GO:0009986]; collagen-containing extracellular matrix [GO:0062023]; external side of plasma membrane [GO:0009897]; extracellular exosome [GO:0070062]; extracellular space [GO:0005615]; focal adhesion [GO:0005925]; immunological synapse [GO:0001772]; integral component of plasma membrane [GO:0005887]; membrane [GO:0016020]; membrane raft [GO:0045121]; plasma membra…	GO:0001541; GO:0001618; GO:0001772; GO:0001910; GO:0001975; GO:0002291; GO:0002438; GO:0002457; GO:0002693; GO:0004888; GO:0005178; GO:0005615; GO:0005623; GO:0005886; GO:0005887; GO:0005925; GO:0007155; GO:0007157; GO:0007159; GO:0007569; GO:0007605; GO:0008360; GO:0009897; GO:0009986; GO:0010212; GO:0010477; GO:0016020; GO:0019221; GO:0022614; GO:0030198; GO:0030838; GO:0031669; GO:0032868; GO:…	R-HSA-198933;R-HSA-216083;R-HSA-6783783;R-HSA-6785807;R-HSA-877300;	hsa:3383;	17.7907	17.7688	17.855	17.737	17.6474	18.3612	18.4092	18.3721	18.3518	18.2245
PARP12_Q9H0J9	-0.882546	-1.00755	-1.08568	-0.686764	-0.99892	0.886161	0.780413	0.812728	0.84408	1.33808	PARP12	Poly [ADP-ribose] polymerase 12	Q9H0J9	1.02081	8.92289e-08	2.53894e-06	-0.355486	FUNCTION: Mono-ADP-ribosyltransferase that mediates mono-ADP-ribosylation of target proteins. {ECO:0000269|PubMed:25043379}.	SUBCELLULAR LOCATION: Nucleus {ECO:0000305}.		protein auto-ADP-ribosylation [GO:0070213]; protein mono-ADP-ribosylation [GO:0140289]	metal ion binding [GO:0046872]; NAD+ ADP-ribosyltransferase activity [GO:0003950]; protein ADP-ribosylase activity [GO:1990404]; RNA binding [GO:0003723]	nucleus [GO:0005634]	GO:0003723; GO:0003950; GO:0005634; GO:0046872; GO:0070213; GO:0140289; GO:1990404		hsa:64761;	17.0913	17.0674	17.0525	17.1286	17.0691	17.4285	17.4083	17.4145	17.4205	17.5146
PABPC4L_P0CB38	0.935892	0.80922	0.941382	1.2075	0.729876	-0.51032	-0.948609	-0.835674	-1.06242	-1.26685	PABPC4L	Polyadenylate-binding protein 4-like	P0CB38	1.04055	8.97104e-08	2.54251e-06	0.657982	FUNCTION: May bind RNA. {ECO:0000305}.				mRNA 3'-UTR binding [GO:0003730]; poly(A) binding [GO:0008143]; poly(U) RNA binding [GO:0008266]; RNA binding [GO:0003723]	cytoplasm [GO:0005737]; cytoplasmic stress granule [GO:0010494]; cytosol [GO:0005829]; nucleus [GO:0005634]; ribonucleoprotein complex [GO:1990904]	GO:0003723; GO:0003730; GO:0005634; GO:0005737; GO:0005829; GO:0008143; GO:0008266; GO:0010494; GO:1990904			16.8866	16.8416	16.8886	16.9832	16.8133	16.3721	16.2162	16.2564	16.1757	16.103
TMED7_Q9Y3B3	-0.989306	-0.969441	-1.18253	-0.617498	-0.865558	0.808051	0.622272	1.05983	0.83066	1.30352	TMED7	Transmembrane emp24 domain-containing protein 7	Q9Y3B3	1.03428	9.04904e-08	2.55447e-06	-0.643491	FUNCTION: Potential role in vesicular protein trafficking, mainly in the early secretory pathway. Appears to play a role in the biosynthesis of secreted cargo including processing and post-translational modifications.	SUBCELLULAR LOCATION: Endoplasmic reticulum membrane; Single-pass type I membrane protein. Golgi apparatus, cis-Golgi network membrane; Single-pass type I membrane protein. Endoplasmic reticulum-Golgi intermediate compartment membrane; Single-pass type I membrane protein. Cytoplasmic vesicle, COPI-coated vesicle membrane {ECO:0000250}; Single-pass type I membrane protein {ECO:0000250}. Cytoplasmi…		endoplasmic reticulum to Golgi vesicle-mediated transport [GO:0006888]; Golgi organization [GO:0007030]; intracellular protein transport [GO:0006886]; retrograde vesicle-mediated transport, Golgi to endoplasmic reticulum [GO:0006890]		COPII-coated ER to Golgi transport vesicle [GO:0030134]; COPII vesicle coat [GO:0030127]; COPI vesicle coat [GO:0030126]; endoplasmic reticulum [GO:0005783]; endoplasmic reticulum-Golgi intermediate compartment [GO:0005793]; endoplasmic reticulum-Golgi intermediate compartment membrane [GO:0033116]; endoplasmic reticulum membrane [GO:0005789]; Golgi apparatus [GO:0005794]; Golgi membrane [GO:0000…	GO:0000139; GO:0005783; GO:0005789; GO:0005793; GO:0005794; GO:0006886; GO:0006888; GO:0006890; GO:0007030; GO:0016021; GO:0030126; GO:0030127; GO:0030133; GO:0030134; GO:0033116	R-HSA-6807878;R-HSA-6811434;	hsa:100302736;hsa:51014;	18.7489	18.7558	18.6817	18.8782	18.7919	19.3741	19.3095	19.4617	19.382	19.5465
SPCS1_C9JBL1	-0.731991	-1.03554	-1.12953	-0.634859	-1.08393	0.697445	0.795492	1.17131	0.708916	1.24269	SPCS1	Signal peptidase complex subunit 1	C9JBL1	1.06004	9.12146e-08	2.55987e-06	-0.928828				signal peptide processing [GO:0006465]	peptidase activity [GO:0008233]	integral component of membrane [GO:0016021]; signal peptidase complex [GO:0005787]	GO:0005787; GO:0006465; GO:0008233; GO:0016021			15.5663	15.4136	15.3663	15.6152	15.3893	16.2854	16.3347	16.5238	16.2912	16.5597
DYNLT3_A6NGJ0	-0.964512	-0.923594	-1.04653	-0.725827	-0.959779	0.811827	0.730814	0.918285	0.688683	1.47064	DYNLT3	Dynein light chain Tctex-type 3	A6NGJ0	1.05245	9.13985e-08	2.55987e-06	-0.7382										14.0579	14.0743	14.0252	14.1533	14.0598	14.7675	14.7351	14.81	14.7183	15.0306
SETD1A_O15047	1.06017	0.632166	1.10609	1.04969	0.816932	-0.770592	-0.816236	-0.932364	-0.91164	-1.23422	SETD1A	Histone-lysine N-methyltransferase SETD1A	O15047	1.01935	9.35641e-08	2.60355e-06	0.340278	FUNCTION: Histone methyltransferase that specifically methylates 'Lys-4' of histone H3, when part of the SET1 histone methyltransferase (HMT) complex, but not if the neighboring 'Lys-9' residue is already methylated. H3 'Lys-4' methylation represents a specific tag for epigenetic transcriptional activation. The non-overlapping localization with SETD1B suggests that SETD1A and SETD1B make non-redu…	SUBCELLULAR LOCATION: Nucleus speckle {ECO:0000269|PubMed:17355966}. Chromosome {ECO:0000269|PubMed:17355966}. Note=Localizes to a largely non-overlapping set of euchromatic nuclear speckles with SETD1B, suggesting that SETD1A and SETD1B each bind to a unique set of target genes.		regulation of chromatin organization [GO:1902275]; regulation of hematopoietic stem cell differentiation [GO:1902036]; regulation of megakaryocyte differentiation [GO:0045652]	beta-catenin binding [GO:0008013]; histone methyltransferase activity (H3-K4 specific) [GO:0042800]; RNA binding [GO:0003723]; transcription factor binding [GO:0008134]	histone methyltransferase complex [GO:0035097]; nuclear chromatin [GO:0000790]; nuclear speck [GO:0016607]; nucleoplasm [GO:0005654]; nucleus [GO:0005634]; Set1C/COMPASS complex [GO:0048188]	GO:0000790; GO:0003723; GO:0005634; GO:0005654; GO:0008013; GO:0008134; GO:0016607; GO:0035097; GO:0042800; GO:0045652; GO:0048188; GO:1902036; GO:1902275	R-HSA-3214841;R-HSA-8936459;	hsa:9739;	17.9463	17.8682	17.9547	17.9444	17.9019	17.6124	17.6041	17.5829	17.5867	17.5279
HIBADH_P31937	-0.991979	-1.05127	-0.893324	-0.982809	-0.739498	0.65881	0.897696	1.24305	1.13749	0.721833	HIBADH	3-hydroxyisobutyrate dehydrogenase, mitochondrial	P31937	1.01965	9.36871e-08	2.60355e-06	-0.359667		SUBCELLULAR LOCATION: Mitochondrion.		branched-chain amino acid catabolic process [GO:0009083]; valine catabolic process [GO:0006574]	3-hydroxyisobutyrate dehydrogenase activity [GO:0008442]; NAD binding [GO:0051287]; NADP binding [GO:0050661]	mitochondrial matrix [GO:0005759]	GO:0005759; GO:0006574; GO:0008442; GO:0009083; GO:0050661; GO:0051287	R-HSA-70895;	hsa:11112;	18.2896	18.2781	18.3086	18.2913	18.3383	18.6082	18.6543	18.7209	18.7006	18.6203
CDC40_O60508	-0.884264	-0.777896	-1.26467	-0.725668	-1.01683	1.1716	0.832401	0.99967	0.854454	0.81121	CDC40	Pre-mRNA-processing factor 17	O60508	1.01711	9.42628e-08	2.6094e-06	-0.327959	FUNCTION: Required for pre-mRNA splicing as component of the activated spliceosome. {ECO:0000269|PubMed:28076346, ECO:0000269|PubMed:28502770, ECO:0000269|PubMed:29301961, ECO:0000269|PubMed:29360106, ECO:0000269|PubMed:29361316, ECO:0000269|PubMed:30705154, ECO:0000269|PubMed:9830021}.	SUBCELLULAR LOCATION: Nucleus {ECO:0000269|PubMed:28076346, ECO:0000269|PubMed:28502770, ECO:0000269|PubMed:29301961, ECO:0000269|PubMed:29360106, ECO:0000269|PubMed:29361316, ECO:0000269|PubMed:30705154}. Nucleus speckle {ECO:0000269|PubMed:9830021}.		mRNA 3'-end processing [GO:0031124]; mRNA export from nucleus [GO:0006406]; mRNA splicing, via spliceosome [GO:0000398]; RNA export from nucleus [GO:0006405]	RNA binding [GO:0003723]	catalytic step 2 spliceosome [GO:0071013]; nuclear speck [GO:0016607]; nucleoplasm [GO:0005654]; U2-type catalytic step 2 spliceosome [GO:0071007]	GO:0000398; GO:0003723; GO:0005654; GO:0006405; GO:0006406; GO:0016607; GO:0031124; GO:0071007; GO:0071013	R-HSA-159236;R-HSA-72163;R-HSA-72187;R-HSA-73856;	hsa:51362;	19.1788	19.1974	19.112	19.2066	19.1555	19.5398	19.4802	19.5096	19.4841	19.4765
LRBA_P50851	-0.951741	-1.07815	-0.81485	-0.82684	-0.989444	0.64971	0.675735	1.09791	1.21209	1.02558	LRBA	Lipopolysaccharide-responsive and beige-like anchor protein	P50851	1.01841	9.53289e-08	2.62725e-06	-0.35096	FUNCTION: May be involved in coupling signal transduction and vesicle trafficking to enable polarized secretion and/or membrane deposition of immune effector molecules. {ECO:0000250}.	SUBCELLULAR LOCATION: Cell membrane {ECO:0000305}; Single-pass membrane protein {ECO:0000305}. Endoplasmic reticulum {ECO:0000250}. Golgi apparatus, trans-Golgi network {ECO:0000250}. Lysosome {ECO:0000250}.	DISEASE: Immunodeficiency, common variable, 8, with autoimmunity (CVID8) [MIM:614700]: An autosomal recessive immunologic disorder associated with defective B-cell differentiation and decreased or absent antibody production. Affected individuals have early-childhood onset of recurrent infections, particularly respiratory infections, and also develop variable autoimmune disorders, including idiopa…			endoplasmic reticulum [GO:0005783]; Golgi apparatus [GO:0005794]; integral component of membrane [GO:0016021]; lysosome [GO:0005764]; membrane [GO:0016020]; plasma membrane [GO:0005886]	GO:0005764; GO:0005783; GO:0005794; GO:0005886; GO:0016020; GO:0016021		hsa:987;	19.0622	19.0384	19.088	19.0857	19.0551	19.3636	19.3685	19.448	19.4695	19.4344
SET_Q01105	-0.939016	-1.00385	-1.05484	-0.566222	-1.05811	0.743155	1.29572	0.872148	0.629625	1.08139	SET	Protein SET;Protein SETSIP	Q01105	1.0316	9.58049e-08	2.62725e-06	-0.659497	FUNCTION: Multitasking protein, involved in apoptosis, transcription, nucleosome assembly and histone chaperoning. Isoform 2 anti-apoptotic activity is mediated by inhibition of the GZMA-activated DNase, NME1. In the course of cytotoxic T-lymphocyte (CTL)-induced apoptosis, GZMA cleaves SET, disrupting its binding to NME1 and releasing NME1 inhibition. Isoform 1 and isoform 2 are potent inhibitor…	SUBCELLULAR LOCATION: Cytoplasm, cytosol. Endoplasmic reticulum. Nucleus, nucleoplasm. Note=In the cytoplasm, found both in the cytosol and associated with the endoplasmic reticulum. The SET complex is associated with the endoplasmic reticulum. Following CTL attack and cleavage by GZMA, moves rapidly to the nucleus, where it is found in the nucleoplasm, avoiding the nucleolus. Similar translocati…	DISEASE: Note=A chromosomal aberration involving SET is found in some cases of acute undifferentiated leukemia (AUL). Translocation t(6;9)(q21;q34.1) with NUP214/CAN.; DISEASE: Mental retardation, autosomal dominant 58 (MRD58) [MIM:618106]: A form of mental retardation, a disorder characterized by significantly below average general intellectual functioning associated with impairments in adaptive…	DNA replication [GO:0006260]; negative regulation of histone acetylation [GO:0035067]; negative regulation of neuron apoptotic process [GO:0043524]; negative regulation of transcription, DNA-templated [GO:0045892]; nucleosome assembly [GO:0006334]; nucleosome disassembly [GO:0006337]; regulation of mRNA stability [GO:0043488]; viral process [GO:0016032]	DNA binding [GO:0003677]; histone binding [GO:0042393]; protein phosphatase inhibitor activity [GO:0004864]; protein phosphatase regulator activity [GO:0019888]	cytoplasm [GO:0005737]; cytosol [GO:0005829]; endoplasmic reticulum [GO:0005783]; lipid droplet [GO:0005811]; nucleoplasm [GO:0005654]; nucleus [GO:0005634]; perinuclear region of cytoplasm [GO:0048471]; protein-containing complex [GO:0032991]	GO:0003677; GO:0004864; GO:0005634; GO:0005654; GO:0005737; GO:0005783; GO:0005811; GO:0005829; GO:0006260; GO:0006334; GO:0006337; GO:0016032; GO:0019888; GO:0032991; GO:0035067; GO:0042393; GO:0043488; GO:0043524; GO:0045892; GO:0048471	R-HSA-2299718;R-HSA-450520;	hsa:6418;	20.8624	20.8393	20.8211	20.9954	20.82	21.4625	21.6596	21.5085	21.422	21.5831
PVRL3_Q9NQS3	-0.762486	-1.00484	-1.28195	-0.570665	-0.995033	0.858186	0.795213	0.820154	0.830484	1.31094	PVRL3	Nectin-3	Q9NQS3	1.06415	9.60112e-08	2.62725e-06	-0.900082	FUNCTION: Plays a role in cell-cell adhesion through heterophilic trans-interactions with nectin-like proteins or nectins, such as trans-interaction with NECTIN2 at Sertoli-spermatid junctions. Trans-interaction with PVR induces activation of CDC42 and RAC small G proteins through common signaling molecules such as SRC and RAP1. Also involved in the formation of cell-cell junctions, including adh…	SUBCELLULAR LOCATION: Cell membrane {ECO:0000305}; Single-pass membrane protein {ECO:0000305}. Cell junction, synapse, postsynaptic cell membrane {ECO:0000250}.		adherens junction organization [GO:0034332]; establishment of protein localization to plasma membrane [GO:0061951]; fertilization [GO:0009566]; heterophilic cell-cell adhesion via plasma membrane cell adhesion molecules [GO:0007157]; homophilic cell adhesion via plasma membrane adhesion molecules [GO:0007156]; lens morphogenesis in camera-type eye [GO:0002089]; protein localization to cell juncti…	cell adhesion molecule binding [GO:0050839]; identical protein binding [GO:0042802]; protein homodimerization activity [GO:0042803]; signaling receptor activity [GO:0038023]	apical junction complex [GO:0043296]; axon [GO:0030424]; cell-cell adherens junction [GO:0005913]; cell-cell contact zone [GO:0044291]; cell-cell junction [GO:0005911]; dendrite [GO:0030425]; hippocampal mossy fiber to CA3 synapse [GO:0098686]; integral component of postsynaptic density membrane [GO:0099061]; plasma membrane [GO:0005886]	GO:0002089; GO:0005886; GO:0005911; GO:0005913; GO:0007156; GO:0007157; GO:0007286; GO:0009566; GO:0030424; GO:0030425; GO:0034332; GO:0038023; GO:0042802; GO:0042803; GO:0043296; GO:0044291; GO:0050839; GO:0060042; GO:0061951; GO:0098686; GO:0099061; GO:1902414	R-HSA-418990;R-HSA-420597;	hsa:25945;	14.1085	13.9903	13.8552	14.202	13.9951	14.8987	14.868	14.8802	14.8852	15.1195
PPCS_Q9HAB8	-0.870254	-1.14814	-0.84331	-0.779506	-0.995105	0.834433	0.89819	0.960833	0.582966	1.3599	PPCS	Phosphopantothenate--cysteine ligase	Q9HAB8	1.02495	9.66734e-08	2.63527e-06	-0.471814	FUNCTION: Catalyzes the second step in the biosynthesis of coenzyme A from vitamin B5, where cysteine is conjugated to 4'-phosphopantothenate to form 4-phosphopantothenoylcysteine (PubMed:11923312, PubMed:12906824, PubMed:29754768). Has a preference for ATP over CTP as a cosubstrate (PubMed:11923312). {ECO:0000269|PubMed:11923312, ECO:0000269|PubMed:12906824, ECO:0000269|PubMed:29754768}.		DISEASE: Cardiomyopathy, dilated 2C (CMD2C) [MIM:618189]: A form of dilated cardiomyopathy, a disorder characterized by ventricular dilation and impaired systolic function, resulting in congestive heart failure and arrhythmia. Patients are at risk of premature death. CMD2C is an autosomal recessive form with variable severity and age of onset ranging from 2 to 20 years. Death in infancy or early …	acetyl-CoA biosynthetic process [GO:0006085]; coenzyme A biosynthetic process [GO:0015937]; coenzyme biosynthetic process [GO:0009108]; heart process [GO:0003015]	ATP binding [GO:0005524]; phosphopantothenate--cysteine ligase activity [GO:0004632]; protein homodimerization activity [GO:0042803]	cytosol [GO:0005829]	GO:0003015; GO:0004632; GO:0005524; GO:0005829; GO:0006085; GO:0009108; GO:0015937; GO:0042803	R-HSA-196783;	hsa:79717;	18.9267	18.856	18.9336	18.9498	18.895	19.3604	19.3766	19.3926	19.2964	19.4941
ANK3_Q12955	-1.0768	-1.17785	-0.922484	-0.485671	-0.9594	0.88714	0.998877	1.04126	0.58243	1.1125	ANK3	Ankyrin-3	Q12955	1.03492	1.03225e-07	2.78172e-06	-0.616285	FUNCTION: In skeletal muscle, required for costamere localization of DMD and betaDAG1 (By similarity). Membrane-cytoskeleton linker. May participate in the maintenance/targeting of ion channels and cell adhesion molecules at the nodes of Ranvier and axonal initial segments. Regulates KCNA1 channel activity in function of dietary Mg(2+) levels, and thereby contributes to the regulation of renal Mg…	SUBCELLULAR LOCATION: Cytoplasm, cytoskeleton {ECO:0000269|PubMed:21223964}. Cell projection, axon {ECO:0000250|UniProtKB:O70511}. Cell membrane, sarcolemma {ECO:0000269|PubMed:21223964}. Cell junction, synapse, postsynaptic cell membrane {ECO:0000250|UniProtKB:O70511}. Lysosome {ECO:0000250|UniProtKB:G5E8K5}. Cell membrane, sarcolemma, T-tubule {ECO:0000250|UniProtKB:O70511}. Note=In skeletal mu…	DISEASE: Note=Genetic variations in ANK3 may be associated with autism spectrum disorders susceptibility. {ECO:0000269|PubMed:22865819}.; DISEASE: Mental retardation, autosomal recessive 37 (MRT37) [MIM:615493]: A disorder characterized by significantly below average general intellectual functioning associated with impairments in adaptive behavior and manifested during the developmental period. M…	axonogenesis [GO:0007409]; cellular response to magnesium ion [GO:0071286]; cytoskeletal anchoring at plasma membrane [GO:0007016]; endoplasmic reticulum to Golgi vesicle-mediated transport [GO:0006888]; establishment of protein localization [GO:0045184]; Golgi to plasma membrane protein transport [GO:0043001]; magnesium ion homeostasis [GO:0010960]; maintenance of protein location in plasma memb…	cadherin binding [GO:0045296]; cytoskeletal protein binding [GO:0008092]; ion channel binding [GO:0044325]; protein binding, bridging [GO:0030674]; spectrin binding [GO:0030507]; structural constituent of cytoskeleton [GO:0005200]	axon initial segment [GO:0043194]; basal plasma membrane [GO:0009925]; basolateral plasma membrane [GO:0016323]; cell [GO:0005623]; cell surface [GO:0009986]; costamere [GO:0043034]; cytosol [GO:0005829]; dendrite [GO:0030425]; endoplasmic reticulum [GO:0005783]; Golgi apparatus [GO:0005794]; intercalated disc [GO:0014704]; lateral plasma membrane [GO:0016328]; lysosome [GO:0005764]; membrane [GO…	GO:0000281; GO:0005200; GO:0005623; GO:0005764; GO:0005783; GO:0005794; GO:0005829; GO:0005886; GO:0006888; GO:0007009; GO:0007016; GO:0007165; GO:0007409; GO:0007528; GO:0008092; GO:0009925; GO:0009986; GO:0010628; GO:0010650; GO:0010765; GO:0010960; GO:0014704; GO:0014731; GO:0016020; GO:0016323; GO:0016328; GO:0016529; GO:0019228; GO:0030018; GO:0030315; GO:0030425; GO:0030507; GO:0030674; GO:…	R-HSA-445095;R-HSA-6807878;	hsa:288;	17.5993	17.5656	17.6507	17.7963	17.6384	18.2539	18.2912	18.3053	18.1524	18.3291
FOSL1_P15407	-1.20414	-0.953611	-1.05027	-0.61148	-0.814295	0.882926	0.94159	0.969568	0.601931	1.23778	FOSL1	Fos-related antigen 1	P15407	1.02583	1.03521e-07	2.78172e-06	-0.47696		SUBCELLULAR LOCATION: Nucleus.		cellular defense response [GO:0006968]; cellular response to extracellular stimulus [GO:0031668]; chemotaxis [GO:0006935]; female pregnancy [GO:0007565]; in utero embryonic development [GO:0001701]; learning [GO:0007612]; negative regulation of cell population proliferation [GO:0008285]; placenta blood vessel development [GO:0060674]; positive regulation of apoptotic process [GO:0043065]; positiv…	DNA-binding transcription activator activity, RNA polymerase II-specific [GO:0001228]; DNA-binding transcription factor activity [GO:0003700]; DNA-binding transcription factor activity, RNA polymerase II-specific [GO:0000981]; RNA polymerase II proximal promoter sequence-specific DNA binding [GO:0000978]	cytosol [GO:0005829]; neuron projection [GO:0043005]; nuclear chromatin [GO:0000790]; nucleoplasm [GO:0005654]; nucleus [GO:0005634]; presynaptic membrane [GO:0042734]	GO:0000790; GO:0000978; GO:0000981; GO:0001228; GO:0001701; GO:0003700; GO:0005634; GO:0005654; GO:0005829; GO:0006357; GO:0006366; GO:0006935; GO:0006968; GO:0007296; GO:0007565; GO:0007612; GO:0008284; GO:0008285; GO:0009612; GO:0009615; GO:0009629; GO:0031668; GO:0032570; GO:0034097; GO:0042542; GO:0042734; GO:0043005; GO:0043065; GO:0045787; GO:0051091; GO:0051412; GO:0051591; GO:0060674; GO:…		hsa:8061;	18.3943	18.4588	18.4339	18.5468	18.4946	18.9314	18.9465	18.9537	18.8591	19.0227
PTPRJ_A0A087WTK0	-0.694831	-0.746138	-0.968463	-0.850542	-1.37044	1.16497	0.884562	0.713347	0.813924	1.05361	PTPRJ	Protein-tyrosine-phosphatase;Receptor-type tyrosine-protein phosphatase eta	A0A087WTK0	1.0309	1.04372e-07	2.78172e-06	-0.505021					protein tyrosine phosphatase activity [GO:0004725]	integral component of membrane [GO:0016021]	GO:0004725; GO:0016021			16.406	16.392	16.3314	16.3635	16.2218	16.9131	16.8366	16.7899	16.8174	16.8827
MESDC2_Q14696	-0.688746	-1.11311	-1.12857	-0.779998	-0.939689	1.16339	0.931987	1.06565	0.578516	0.91058	MESDC2	LDLR chaperone MESD	Q14696	1.02032	1.04377e-07	2.78172e-06	-0.381389	FUNCTION: Chaperone specifically assisting the folding of beta-propeller/EGF modules within the family of low-density lipoprotein receptors (LDLRs). Acts as a modulator of the Wnt pathway through chaperoning the coreceptors of the canonical Wnt pathway, LRP5 and LRP6, to the plasma membrane. Essential for specification of embryonic polarity and mesoderm induction. Plays an essential role in neuro…	SUBCELLULAR LOCATION: Endoplasmic reticulum {ECO:0000269|PubMed:15014448, ECO:0000269|PubMed:17488095}. Note=Released from apoptotic cells and shed photoreceptor outer segments. {ECO:0000250|UniProtKB:Q9ERE7}.		mesoderm development [GO:0007498]; phagocytosis [GO:0006909]; positive regulation of skeletal muscle acetylcholine-gated channel clustering [GO:1904395]; protein folding [GO:0006457]; protein localization to cell surface [GO:0034394]; Wnt signaling pathway [GO:0016055]	identical protein binding [GO:0042802]; low-density lipoprotein particle receptor binding [GO:0050750]	endoplasmic reticulum [GO:0005783]; plasma membrane [GO:0005886]	GO:0005783; GO:0005886; GO:0006457; GO:0006909; GO:0007498; GO:0016055; GO:0034394; GO:0042802; GO:0050750; GO:1904395		hsa:23184;	18.8158	18.7288	18.7256	18.7971	18.7643	19.1955	19.1481	19.1755	19.0756	19.1437
_A0A1W2PNV4	-0.81702	-0.962986	-1.18577	-0.889366	-0.843636	0.927356	0.809458	0.952059	0.839267	1.17064			A0A1W2PNV4	1.01255	1.0469e-07	2.78172e-06	-0.267046				Arp2/3 complex-mediated actin nucleation [GO:0034314]	actin filament binding [GO:0051015]	Arp2/3 protein complex [GO:0005885]	GO:0005885; GO:0034314; GO:0051015			21.2901	21.2693	21.2377	21.2798	21.2863	21.5379	21.5212	21.5414	21.5254	21.5725
BANF1_O75531	-1.04446	-0.786151	-1.01477	-0.65983	-1.13328	0.933192	1.22723	1.08808	0.609219	0.780769	BANF1	Barrier-to-autointegration factor;Barrier-to-autointegration factor, N-terminally processed	O75531	1.02214	1.04723e-07	2.78172e-06	-0.440645	FUNCTION: Plays fundamental roles in nuclear assembly, chromatin organization, gene expression and gonad development. May potently compress chromatin structure and be involved in membrane recruitment and chromatin decondensation during nuclear assembly. Contains 2 non-specific dsDNA-binding sites which may promote DNA cross-bridging. {ECO:0000269|PubMed:12163470}.; FUNCTION: (Microbial infection)…	SUBCELLULAR LOCATION: Barrier-to-autointegration factor: Nucleus {ECO:0000269|PubMed:16495336, ECO:0000269|PubMed:24600006}. Cytoplasm {ECO:0000269|PubMed:16495336, ECO:0000269|PubMed:24600006}. Chromosome {ECO:0000269|PubMed:16495336}. Nucleus envelope {ECO:0000269|PubMed:24600006}. Note=Significantly enriched at the nuclear inner membrane, diffusely throughout the nucleus during interphase and …	DISEASE: Nestor-Guillermo progeria syndrome (NGPS) [MIM:614008]: An atypical progeroid syndrome characterized by normal development in the first years of life, later followed by the emergence of generalized lipoatrophy, severe osteoporosis, and marked osteolysis. The atrophic facial subcutaneous fat pad and the marked osteolysis of the maxilla and mandible result in a typical pseudosenile facial …	chromosome condensation [GO:0030261]; chromosome segregation [GO:0007059]; DNA integration [GO:0015074]; establishment of integrated proviral latency [GO:0075713]; mitotic nuclear envelope reassembly [GO:0007084]; negative regulation of viral genome replication [GO:0045071]; nuclear transport [GO:0051169]; response to virus [GO:0009615]	DNA binding [GO:0003677]; enzyme binding [GO:0019899]; identical protein binding [GO:0042802]; LEM domain binding [GO:0097726]; protein C-terminus binding [GO:0008022]; protein homodimerization activity [GO:0042803]; protein N-terminus binding [GO:0047485]	condensed chromosome [GO:0000793]; cytoplasm [GO:0005737]; cytosol [GO:0005829]; nuclear envelope [GO:0005635]; nucleoplasm [GO:0005654]; nucleus [GO:0005634]	GO:0000793; GO:0003677; GO:0005634; GO:0005635; GO:0005654; GO:0005737; GO:0005829; GO:0007059; GO:0007084; GO:0008022; GO:0009615; GO:0015074; GO:0019899; GO:0030261; GO:0042802; GO:0042803; GO:0045071; GO:0047485; GO:0051169; GO:0075713; GO:0097726	R-HSA-162592;R-HSA-164843;R-HSA-175567;R-HSA-177539;R-HSA-180689;R-HSA-180910;R-HSA-2980766;R-HSA-2995383;	hsa:8815;	19.8784	19.9398	19.8855	19.9698	19.8573	20.3481	20.4179	20.3849	20.2712	20.3119
KIDINS220_Q9ULH0	0.979869	0.794743	0.968238	1.01474	0.886197	-0.451999	-1.20774	-0.893293	-0.977697	-1.11306	KIDINS220	Kinase D-interacting substrate of 220 kDa	Q9ULH0	1.02304	1.04772e-07	2.78172e-06	0.410104	FUNCTION: Promotes a prolonged MAP-kinase signaling by neurotrophins through activation of a Rap1-dependent mechanism. Provides a docking site for the CRKL-C3G complex, resulting in Rap1-dependent sustained ERK activation. May play an important role in regulating postsynaptic signal transduction through the syntrophin-mediated localization of receptor tyrosine kinases such as EPHA4. In cooperatio…	SUBCELLULAR LOCATION: Membrane {ECO:0000305}; Multi-pass membrane protein {ECO:0000305}. Late endosome {ECO:0000250}. Note=Localized at late endosome before or after nerve growth factor (NGF) stimulation.	DISEASE: Spastic paraplegia, intellectual disability, nystagmus, and obesity (SINO) [MIM:617296]: An autosomal dominant syndrome characterized by rapid growth in infancy, obesity, global developmental delay, intellectual disability, spastic paraplegia, ocular defects, and dysmorphic facial features. {ECO:0000269|PubMed:27005418}. Note=The disease is caused by mutations affecting the gene represen…	activation of MAPKK activity [GO:0000186]; cellular response to nerve growth factor stimulus [GO:1990090]; dendrite morphogenesis [GO:0048813]; in utero embryonic development [GO:0001701]; nerve growth factor signaling pathway [GO:0038180]; positive regulation of neuron projection development [GO:0010976]	PDZ domain binding [GO:0030165]; protein kinase regulator activity [GO:0019887]	cytosol [GO:0005829]; integral component of membrane [GO:0016021]; late endosome [GO:0005770]; membrane [GO:0016020]; protein-containing complex [GO:0032991]	GO:0000186; GO:0001701; GO:0005770; GO:0005829; GO:0010976; GO:0016020; GO:0016021; GO:0019887; GO:0030165; GO:0032991; GO:0038180; GO:0048813; GO:1990090	R-HSA-170984;	hsa:57498;	18.2249	18.184	18.2223	18.2326	18.2042	17.9087	17.7419	17.8113	17.7927	17.7628
TXN_P10599	-0.850507	-0.991984	-0.924643	-0.621217	-1.23964	0.908403	1.10261	1.21503	0.787655	0.614293	TXN	Thioredoxin	P10599	1.02524	1.05801e-07	2.79863e-06	-0.526124	FUNCTION: Participates in various redox reactions through the reversible oxidation of its active center dithiol to a disulfide and catalyzes dithiol-disulfide exchange reactions. Plays a role in the reversible S-nitrosylation of cysteine residues in target proteins, and thereby contributes to the response to intracellular nitric oxide. Nitrosylates the active site Cys of CASP3 in response to nitr…	SUBCELLULAR LOCATION: Nucleus {ECO:0000269|PubMed:11118054, ECO:0000269|PubMed:9108029}. Cytoplasm {ECO:0000269|PubMed:11118054, ECO:0000269|PubMed:9108029}. Secreted {ECO:0000269|PubMed:1332947}. Note=Translocates from the cytoplasm into the nucleus after phorbol 12-myristate 13-acetate induction (PMA) (PubMed:9108029). Predominantly in the cytoplasm in non irradiated cells (PubMed:11118054). Ra…		activation of protein kinase B activity [GO:0032148]; cell redox homeostasis [GO:0045454]; glycerol ether metabolic process [GO:0006662]; negative regulation of hydrogen peroxide-induced cell death [GO:1903206]; negative regulation of protein export from nucleus [GO:0046826]; negative regulation of transcription by RNA polymerase II [GO:0000122]; oxidation-reduction process [GO:0055114]; positive…	peptide disulfide oxidoreductase activity [GO:0015037]; protein disulfide oxidoreductase activity [GO:0015035]; RNA binding [GO:0003723]; thioredoxin-disulfide reductase activity [GO:0004791]	cell [GO:0005623]; cytosol [GO:0005829]; extracellular exosome [GO:0070062]; nucleoplasm [GO:0005654]	GO:0000122; GO:0003723; GO:0004791; GO:0005623; GO:0005654; GO:0005829; GO:0006662; GO:0009314; GO:0015035; GO:0015037; GO:0032148; GO:0033138; GO:0043388; GO:0045454; GO:0046826; GO:0051897; GO:0055114; GO:0070062; GO:1903206	R-HSA-2559580;R-HSA-3299685;R-HSA-499943;R-HSA-5628897;R-HSA-5676934;R-HSA-844456;R-HSA-9617629;	hsa:7295;	20.8649	20.8247	20.8438	20.93	20.7543	21.3648	21.42	21.4519	21.3304	21.2812
S100A10_P60903	-0.842707	-0.968186	-1.12804	-0.5029	-1.17438	0.951015	0.936319	1.25987	0.750321	0.718692	S100A10	Protein S100-A10	P60903	1.03661	1.06648e-07	2.81064e-06	-0.733291	FUNCTION: Because S100A10 induces the dimerization of ANXA2/p36, it may function as a regulator of protein phosphorylation in that the ANXA2 monomer is the preferred target (in vitro) of tyrosine-specific kinase.			membrane raft assembly [GO:0001765]; positive regulation of binding [GO:0051099]; positive regulation of focal adhesion assembly [GO:0051894]; positive regulation of GTPase activity [GO:0043547]; positive regulation of stress fiber assembly [GO:0051496]; positive regulation of substrate adhesion-dependent cell spreading [GO:1900026]; protein heterotetramerization [GO:0051290]; protein localizatio…	calcium ion binding [GO:0005509]; ion channel binding [GO:0044325]; protein homodimerization activity [GO:0042803]	collagen-containing extracellular matrix [GO:0062023]; endoplasmic reticulum [GO:0005783]; extracellular exosome [GO:0070062]; extracellular region [GO:0005576]; extrinsic component of plasma membrane [GO:0019897]	GO:0001765; GO:0005509; GO:0005576; GO:0005783; GO:0006900; GO:0019897; GO:0042493; GO:0042803; GO:0043547; GO:0044325; GO:0051099; GO:0051290; GO:0051496; GO:0051894; GO:0062023; GO:0070062; GO:0072659; GO:1900026	R-HSA-75205;	hsa:6281;	20.0625	20.0126	19.9491	20.1974	19.9307	20.7748	20.769	20.8975	20.6951	20.6825
LRPPRC_P42704	-1.14114	-0.741148	-0.93375	-0.901068	-1.00163	0.952086	0.877495	0.97691	0.922402	0.98984	LRPPRC	Leucine-rich PPR motif-containing protein, mitochondrial	P42704	1.01052	1.07477e-07	2.82056e-06	-0.242569	FUNCTION: May play a role in RNA metabolism in both nuclei and mitochondria. In the nucleus binds to HNRPA1-associated poly(A) mRNAs and is part of nmRNP complexes at late stages of mRNA maturation which are possibly associated with nuclear mRNA export. May bind mature mRNA in the nucleus outer membrane. In mitochondria binds to poly(A) mRNA. Plays a role in translation or stability of mitochondr…	SUBCELLULAR LOCATION: Mitochondrion. Nucleus, nucleoplasm. Nucleus inner membrane. Nucleus outer membrane. Note=Seems to be predominantly mitochondrial.	DISEASE: Leigh syndrome French-Canadian type (LSFC) [MIM:220111]: Severe neurological disorder characterized by bilaterally symmetrical necrotic lesions in subcortical brain regions that is commonly associated with systemic cytochrome c oxidase (COX) deficiency. In the Saguenay-Lac Saint Jean region of Quebec province in Canada, a biochemically distinct form of Leigh syndrome with COX deficiency …	mitochondrion transport along microtubule [GO:0047497]; mRNA transport [GO:0051028]; negative regulation of mitochondrial RNA catabolic process [GO:0000961]; regulation of mitochondrial translation [GO:0070129]	beta-tubulin binding [GO:0048487]; microtubule binding [GO:0008017]; RNA binding [GO:0003723]; single-stranded DNA binding [GO:0003697]; ubiquitin protein ligase binding [GO:0031625]	condensed nuclear chromosome [GO:0000794]; cytoskeleton [GO:0005856]; membrane [GO:0016020]; microtubule [GO:0005874]; mitochondrial nucleoid [GO:0042645]; mitochondrion [GO:0005739]; nuclear inner membrane [GO:0005637]; nuclear outer membrane [GO:0005640]; nucleoplasm [GO:0005654]; nucleus [GO:0005634]; perinuclear region of cytoplasm [GO:0048471]; ribonucleoprotein complex [GO:1990904]	GO:0000794; GO:0000961; GO:0003697; GO:0003723; GO:0005634; GO:0005637; GO:0005640; GO:0005654; GO:0005739; GO:0005856; GO:0005874; GO:0008017; GO:0016020; GO:0031625; GO:0042645; GO:0047497; GO:0048471; GO:0048487; GO:0051028; GO:0070129; GO:1990904	R-HSA-5628897;R-HSA-611105;	hsa:10128;	23.0352	23.0866	23.0619	23.0661	23.0532	23.3042	23.2947	23.3074	23.3004	23.3091
C19orf47_Q8N9M1	1.17001	0.837381	0.827761	0.837336	0.982859	-0.809272	-0.643351	-1.04169	-0.870073	-1.29096	C19orf47	Uncharacterized protein C19orf47	Q8N9M1	1.02063	1.07974e-07	2.82056e-06	0.358199						nucleoplasm [GO:0005654]	GO:0005654		hsa:126526;	17.7655	17.7015	17.6996	17.7015	17.7295	17.3847	17.4167	17.34	17.373	17.2921
TSG101_Q99816	-0.816872	-0.980011	-0.981464	-0.742184	-1.10235	0.943015	0.86772	0.883489	0.53983	1.38882	TSG101	Tumor susceptibility gene 101 protein	Q99816	1.03105	1.0821e-07	2.82056e-06	-0.583932	FUNCTION: Component of the ESCRT-I complex, a regulator of vesicular trafficking process. Binds to ubiquitinated cargo proteins and is required for the sorting of endocytic ubiquitinated cargos into multivesicular bodies (MVBs). Mediates the association between the ESCRT-0 and ESCRT-I complex. Required for completion of cytokinesis; the function requires CEP55. May be involved in cell growth and …	SUBCELLULAR LOCATION: Cytoplasm {ECO:0000269|PubMed:17853893}. Early endosome membrane {ECO:0000269|PubMed:23166352}; Peripheral membrane protein {ECO:0000305|PubMed:23166352}; Cytoplasmic side {ECO:0000305|PubMed:23166352}. Late endosome membrane {ECO:0000269|PubMed:11916981, ECO:0000269|PubMed:17229889}; Peripheral membrane protein. Cytoplasm, cytoskeleton, microtubule organizing center, centro…		autophagosome maturation [GO:0097352]; cell cycle arrest [GO:0007050]; cell division [GO:0051301]; endosomal transport [GO:0016197]; endosome to lysosome transport [GO:0008333]; exosomal secretion [GO:1990182]; extracellular transport [GO:0006858]; intracellular transport of virus [GO:0075733]; keratinocyte differentiation [GO:0030216]; macroautophagy [GO:0016236]; multivesicular body assembly [G…	calcium-dependent protein binding [GO:0048306]; DNA binding [GO:0003677]; nuclear receptor transcription coactivator activity [GO:0030374]; protein-containing complex binding [GO:0044877]; protein homodimerization activity [GO:0042803]; transcription corepressor activity [GO:0003714]; ubiquitin binding [GO:0043130]; ubiquitin protein ligase binding [GO:0031625]; virion binding [GO:0046790]	cytoplasm [GO:0005737]; cytosol [GO:0005829]; early endosome [GO:0005769]; early endosome membrane [GO:0031901]; endosome [GO:0005768]; endosome membrane [GO:0010008]; ESCRT I complex [GO:0000813]; extracellular exosome [GO:0070062]; Flemming body [GO:0090543]; host cell [GO:0043657]; late endosome [GO:0005770]; late endosome membrane [GO:0031902]; microtubule organizing center [GO:0005815]; mult…	GO:0000813; GO:0001558; GO:0003677; GO:0003714; GO:0005730; GO:0005737; GO:0005768; GO:0005769; GO:0005770; GO:0005771; GO:0005815; GO:0005829; GO:0005886; GO:0006513; GO:0006858; GO:0007050; GO:0007175; GO:0008285; GO:0008333; GO:0010008; GO:0015031; GO:0016197; GO:0016236; GO:0019058; GO:0030216; GO:0030374; GO:0031625; GO:0031901; GO:0031902; GO:0036258; GO:0039702; GO:0042059; GO:0042803; GO:…	R-HSA-162588;R-HSA-174490;R-HSA-917729;R-HSA-9615710;	hsa:7251;	18.8418	18.7903	18.7898	18.8654	18.7517	19.3975	19.3738	19.3788	19.2702	19.5383
PLD3_Q8IV08	-1.0702	-1.15796	-0.991299	-0.492269	-0.920871	0.998918	0.707669	0.888781	0.822309	1.21492	PLD3	Phospholipase D3	Q8IV08	1.02604	1.10274e-07	2.86392e-06	-0.472377	FUNCTION: May be involved in APP processing. {ECO:0000305|PubMed:24336208}.	SUBCELLULAR LOCATION: Endoplasmic reticulum membrane {ECO:0000269|PubMed:15794758}; Single-pass type II membrane protein {ECO:0000269|PubMed:15794758}.	DISEASE: Spinocerebellar ataxia 46 (SCA46) [MIM:617770]: A form of spinocerebellar ataxia, a clinically and genetically heterogeneous group of cerebellar disorders. Patients show progressive incoordination of gait and often poor coordination of hands, speech and eye movements, due to degeneration of the cerebellum with variable involvement of the brainstem and spinal cord. SCA46 is a slowly progr…	lipid catabolic process [GO:0016042]	N-acylphosphatidylethanolamine-specific phospholipase D activity [GO:0070290]; phospholipase D activity [GO:0004630]	endoplasmic reticulum membrane [GO:0005789]; extracellular exosome [GO:0070062]; integral component of membrane [GO:0016021]	GO:0004630; GO:0005789; GO:0016021; GO:0016042; GO:0070062; GO:0070290	R-HSA-1483148;R-HSA-2029485;	hsa:23646;	18.1005	18.0782	18.1207	18.2479	18.1386	18.628	18.5538	18.5999	18.583	18.6831
TRAPPC12_Q8WVT3	-1.15636	-0.781533	-0.91108	-0.720718	-1.06718	1.2002	0.671983	1.2066	0.748155	0.809929	TRAPPC12	Trafficking protein particle complex subunit 12	Q8WVT3	1.02538	1.11948e-07	2.89685e-06	-0.439035	FUNCTION: Component of the TRAPP complex, which is involved in endoplasmic reticulum to Golgi apparatus trafficking at a very early stage (PubMed:21525244, PubMed:28777934). Also plays a role in chromosome congression, kinetochore assembly and stability and controls the recruitment of CENPE to the kinetochores (PubMed:25918224). {ECO:0000269|PubMed:21525244, ECO:0000269|PubMed:25918224, ECO:00002…	SUBCELLULAR LOCATION: Endoplasmic reticulum-Golgi intermediate compartment {ECO:0000269|PubMed:21525244}. Nucleus {ECO:0000269|PubMed:25918224}. Note=Mainly localizes to structures resembling the Golgi and a small amount is found in the nucleus. {ECO:0000269|PubMed:25918224}.	DISEASE: Encephalopathy, progressive, early-onset, with brain atrophy and spasticity (PEBAS) [MIM:617669]: An autosomal recessive, progressive encephalopathy characterized by central nervous system atrophy and dysfunction, spasticity, microcephaly, global developmental delay, and hearing loss. {ECO:0000269|PubMed:28777934}. Note=The disease is caused by mutations affecting the gene represented in…	endoplasmic reticulum to Golgi vesicle-mediated transport [GO:0006888]; Golgi organization [GO:0007030]; metaphase plate congression [GO:0051310]; positive regulation of protein localization to kinetochore [GO:1905342]; protein complex oligomerization [GO:0051259]; regulation of kinetochore assembly [GO:0090234]	endopeptidase activity [GO:0004175]	cell [GO:0005623]; cytosol [GO:0005829]; endoplasmic reticulum-Golgi intermediate compartment [GO:0005793]; Golgi apparatus [GO:0005794]; kinetochore [GO:0000776]; nucleoplasm [GO:0005654]; nucleus [GO:0005634]; TRAPP complex [GO:0030008]	GO:0000776; GO:0004175; GO:0005623; GO:0005634; GO:0005654; GO:0005793; GO:0005794; GO:0005829; GO:0006888; GO:0007030; GO:0030008; GO:0051259; GO:0051310; GO:0090234; GO:1905342	R-HSA-8876198;	hsa:51112;	17.2409	17.3296	17.299	17.344	17.262	17.7987	17.6737	17.8002	17.6917	17.7063
TRAPPC2L_H3BP13	-0.88342	-1.06919	-0.660014	-0.971967	-1.053	0.634841	0.963041	0.716533	1.01191	1.31126	TRAPPC2L	Trafficking protein particle complex subunit 2-like protein	H3BP13	1.02499	1.14291e-07	2.94565e-06	-0.430989				endoplasmic reticulum to Golgi vesicle-mediated transport [GO:0006888]		cytosol [GO:0005829]; intracellular membrane-bounded organelle [GO:0043231]	GO:0005829; GO:0006888; GO:0043231			17.2551	17.2119	17.307	17.2345	17.2157	17.6078	17.684	17.6268	17.6954	17.765
FAM160B1_Q5W0V3	-1.14623	-0.720216	-0.7804	-0.867227	-1.13749	0.941079	0.948633	1.05643	0.572859	1.13257	FAM160B1	Protein FAM160B1	Q5W0V3	1.01974	1.15046e-07	2.94565e-06	-0.365123									hsa:57700;	18.4548	18.5384	18.5266	18.5095	18.4565	18.8644	18.8659	18.887	18.7921	18.902
ATL3_Q6DD88	-1.0896	-0.879546	-1.19381	-0.605091	-0.840929	0.988217	0.92217	1.2921	0.537264	0.869226	ATL3	Atlastin-3	Q6DD88	1.05359	1.15071e-07	2.94565e-06	-0.964018	FUNCTION: GTPase tethering membranes through formation of trans-homooligomers and mediating homotypic fusion of endoplasmic reticulum membranes. Functions in endoplasmic reticulum tubular network biogenesis (PubMed:18270207, PubMed:19665976, PubMed:27619977). {ECO:0000269|PubMed:18270207, ECO:0000269|PubMed:19665976, ECO:0000269|PubMed:27619977}.	SUBCELLULAR LOCATION: Endoplasmic reticulum membrane {ECO:0000269|PubMed:18270207, ECO:0000269|PubMed:24459106, ECO:0000269|PubMed:27619977}; Multi-pass membrane protein {ECO:0000269|PubMed:18270207, ECO:0000269|PubMed:24459106}. Note=Localizes to endoplasmic reticulum tubules and accumulates in punctuate structures corresponding to 3-way junctions, which represent crossing-points at which the tu…	DISEASE: Neuropathy, hereditary sensory, 1F (HSN1F) [MIM:615632]: An autosomal dominant sensory neuropathy affecting the lower limbs. Distal sensory impairment becomes apparent during the second or third decade of life, resulting in painless ulceration of the feet with poor healing, which can progress to osteomyelitis, bone destruction, and amputation. There is no autonomic involvement, spasticit…	endoplasmic reticulum organization [GO:0007029]; Golgi organization [GO:0007030]; positive regulation of endoplasmic reticulum tubular network organization [GO:1903373]; protein homooligomerization [GO:0051260]	GTPase activity [GO:0003924]; GTP binding [GO:0005525]; identical protein binding [GO:0042802]	endoplasmic reticulum [GO:0005783]; endoplasmic reticulum membrane [GO:0005789]; endoplasmic reticulum tubular network [GO:0071782]; endoplasmic reticulum tubular network membrane [GO:0098826]; integral component of membrane [GO:0016021]; membrane [GO:0016020]	GO:0003924; GO:0005525; GO:0005783; GO:0005789; GO:0007029; GO:0007030; GO:0016020; GO:0016021; GO:0042802; GO:0051260; GO:0071782; GO:0098826; GO:1903373		hsa:25923;	17.9024	18.0122	17.8479	18.1557	18.0324	18.9889	18.9543	19.1478	18.7531	18.9266
FIS1_Q9Y3D6	-0.599576	-0.796457	-1.30331	-0.827812	-1.09538	0.847454	1.08736	1.14682	0.671642	0.869259	FIS1	Mitochondrial fission 1 protein	Q9Y3D6	1.03169	1.17942e-07	2.99907e-06	-0.55505	FUNCTION: Involved in the fragmentation of the mitochondrial network and its perinuclear clustering. Plays a minor role in the recruitment and association of the fission mediator dynamin-related protein 1 (DNM1L) to the mitochondrial surface and mitochondrial fission. Can induce cytochrome c release from the mitochondrion to the cytosol, ultimately leading to apoptosis. Also mediates peroxisomal …	SUBCELLULAR LOCATION: Mitochondrion outer membrane; Single-pass membrane protein. Peroxisome membrane; Single-pass membrane protein.		apoptotic process [GO:0006915]; autophagy of mitochondrion [GO:0000422]; calcium-mediated signaling using intracellular calcium source [GO:0035584]; cellular response to glucose stimulus [GO:0071333]; cellular response to peptide [GO:1901653]; cellular response to thapsigargin [GO:1904579]; cellular response to toxic substance [GO:0097237]; mitochondrial fission [GO:0000266]; mitochondrial fragme…	protein-containing complex binding [GO:0044877]	cell [GO:0005623]; endoplasmic reticulum [GO:0005783]; integral component of mitochondrial outer membrane [GO:0031307]; integral component of peroxisomal membrane [GO:0005779]; membrane [GO:0016020]; mitochondrial outer membrane [GO:0005741]; mitochondrion [GO:0005739]; peroxisome [GO:0005777]; protein-containing complex [GO:0032991]	GO:0000266; GO:0000422; GO:0001836; GO:0005623; GO:0005739; GO:0005741; GO:0005777; GO:0005779; GO:0005783; GO:0006626; GO:0006915; GO:0007204; GO:0008053; GO:0010821; GO:0014850; GO:0016020; GO:0016559; GO:0031307; GO:0031667; GO:0032471; GO:0032991; GO:0035584; GO:0043280; GO:0043525; GO:0043653; GO:0044877; GO:0051260; GO:0051561; GO:0070584; GO:0071333; GO:0090141; GO:0090314; GO:0097237; GO:…	R-HSA-9603798;	hsa:51024;	17.6112	17.5521	17.3999	17.5427	17.4623	18.0456	18.1176	18.1354	17.9928	18.0521
COL4A2_P08572	-0.737451	-0.853674	-0.931358	-1.09073	-1.01766	0.886364	0.997946	0.827063	0.555492	1.36401	COL4A2	Collagen alpha-2(IV) chain;Canstatin	P08572	1.02792	1.17998e-07	2.99907e-06	-0.470912	FUNCTION: Type IV collagen is the major structural component of glomerular basement membranes (GBM), forming a 'chicken-wire' meshwork together with laminins, proteoglycans and entactin/nidogen.; FUNCTION: Canstatin, a cleavage product corresponding to the collagen alpha 2(IV) NC1 domain, possesses both anti-angiogenic and anti-tumor cell activity. It inhibits proliferation and migration of endot…	SUBCELLULAR LOCATION: Secreted, extracellular space, extracellular matrix, basement membrane.	DISEASE: Brain small vessel disease 2 (BSVD2) [MIM:614483]: An autosomal dominant cerebrovascular disorder with variable manifestations reflecting the location and severity of the vascular defect. BSVD2 features include intracranial hemorrage, fluid-filled cysts or cavities within the cerebral hemispheres, delayed psychomotor development, hemiplegia, spasticity and seizures. {ECO:0000269|PubMed:2…	aging [GO:0007568]; angiogenesis [GO:0001525]; cellular response to transforming growth factor beta stimulus [GO:0071560]; collagen-activated tyrosine kinase receptor signaling pathway [GO:0038063]; endodermal cell differentiation [GO:0035987]; extracellular matrix organization [GO:0030198]; negative regulation of angiogenesis [GO:0016525]; response to activity [GO:0014823]; transcription, DNA-te…	extracellular matrix structural constituent [GO:0005201]; extracellular matrix structural constituent conferring tensile strength [GO:0030020]	collagen-containing extracellular matrix [GO:0062023]; collagen type IV trimer [GO:0005587]; endoplasmic reticulum lumen [GO:0005788]; extracellular exosome [GO:0070062]; extracellular matrix [GO:0031012]; extracellular region [GO:0005576]; extracellular space [GO:0005615]	GO:0001525; GO:0005201; GO:0005576; GO:0005587; GO:0005615; GO:0005788; GO:0006351; GO:0007568; GO:0014823; GO:0016525; GO:0030020; GO:0030198; GO:0031012; GO:0035987; GO:0038063; GO:0062023; GO:0070062; GO:0071560	R-HSA-1442490;R-HSA-1474244;R-HSA-1650814;R-HSA-186797;R-HSA-2022090;R-HSA-216083;R-HSA-2214320;R-HSA-2243919;R-HSA-3000157;R-HSA-3000171;R-HSA-3000178;R-HSA-3000480;R-HSA-419037;R-HSA-8948216;	hsa:1284;	16.9134	16.8839	16.8641	16.8236	16.8422	17.3262	17.3546	17.3112	17.2421	17.4477
RFT1_Q96AA3	-0.972282	-1.02423	-0.914208	-0.716154	-0.991943	0.806408	0.55836	0.74163	1.20723	1.30519	RFT1	Protein RFT1 homolog	Q96AA3	1.0383	1.19809e-07	3.03432e-06	-0.602982	FUNCTION: May be involved in N-linked oligosaccharide assembly. May participate in the translocation of oligosaccharide from the cytoplasmic side to the lumenal side of the endoplasmic reticulum membrane. {ECO:0000269|PubMed:18313027}.	SUBCELLULAR LOCATION: Membrane {ECO:0000305}; Multi-pass membrane protein {ECO:0000305}.	DISEASE: Congenital disorder of glycosylation 1N (CDG1N) [MIM:612015]: A form of congenital disorder of glycosylation, a multisystem disorder caused by a defect in glycoprotein biosynthesis and characterized by under-glycosylated serum glycoproteins. Congenital disorders of glycosylation result in a wide variety of clinical features, such as defects in the nervous system development, psychomotor …	carbohydrate transport [GO:0008643]; glycolipid translocation [GO:0034203]	lipid transporter activity [GO:0005319]	endoplasmic reticulum membrane [GO:0005789]; integral component of membrane [GO:0016021]	GO:0005319; GO:0005789; GO:0008643; GO:0016021; GO:0034203	R-HSA-446193;R-HSA-4570571;	hsa:91869;	15.7269	15.7099	15.7458	15.8105	15.7205	16.3074	16.2264	16.2863	16.4382	16.4702
EXOC1_Q9NV70	-0.808502	-0.659358	-1.0787	-1.10404	-1.00477	0.871639	0.809226	0.83194	0.828909	1.31366	EXOC1	Exocyst complex component 1	Q9NV70	1.0179	1.20485e-07	3.0406e-06	-0.347847	FUNCTION: Component of the exocyst complex involved in the docking of exocytic vesicles with fusion sites on the plasma membrane.; FUNCTION: (Microbial infection) Has an antiviral effect against flaviviruses by affecting viral RNA transcription and translation through the sequestration of elongation factor 1-alpha (EEF1A1). This results in decreased viral RNA synthesis and decreased viral protein…	SUBCELLULAR LOCATION: Midbody, Midbody ring {ECO:0000269|PubMed:16213214}. Cytoplasm {ECO:0000269|PubMed:19889084}. Cytoplasm, perinuclear region {ECO:0000269|PubMed:19889084}. Note=Colocalizes with CNTRL/centriolin at the midbody ring. {ECO:0000269|PubMed:16213214}.		defense response to virus [GO:0051607]; exocyst localization [GO:0051601]; exocytosis [GO:0006887]; Golgi to plasma membrane transport [GO:0006893]; phosphatidylinositol-mediated signaling [GO:0048015]; positive regulation of protein secretion [GO:0050714]; protein transport [GO:0015031]; regulation of macroautophagy [GO:0016241]; viral process [GO:0016032]	GTP-Rho binding [GO:0017049]; phosphatidylinositol-4,5-bisphosphate binding [GO:0005546]	cytoplasm [GO:0005737]; cytoplasmic side of apical plasma membrane [GO:0098592]; cytosol [GO:0005829]; exocyst [GO:0000145]; Flemming body [GO:0090543]; membrane [GO:0016020]; perinuclear region of cytoplasm [GO:0048471]; plasma membrane [GO:0005886]	GO:0000145; GO:0005546; GO:0005737; GO:0005829; GO:0005886; GO:0006887; GO:0006893; GO:0015031; GO:0016020; GO:0016032; GO:0016241; GO:0017049; GO:0048015; GO:0048471; GO:0050714; GO:0051601; GO:0051607; GO:0090543; GO:0098592	R-HSA-1445148;R-HSA-264876;R-HSA-5620916;	hsa:55763;	19.455	19.4829	19.4046	19.3998	19.4184	19.7689	19.7572	19.7615	19.7609	19.8514
[truncated: 6,859 more rows]

## Sheet: DOWN
GENE	PROTEIN	UNIPROT	P.VALUE	ADJ.P.VAL	LOGFC
EFHD1	EF-hand domain-containing protein D1	Q9BUP0	1.23485e-08	9.75357e-07	-2.55005
UTS2	Urotensin-2	Q5H8X8	2.04652e-12	1.46162e-08	-2.47869
CEP290	Centrosomal protein of 290 kDa	J3KNF5	2.81006e-09	5.28144e-07	-2.34344
KLC3	Kinesin light chain 3	Q6P597	2.82451e-07	5.21257e-06	-2.09982
SDHC	Succinate dehydrogenase cytochrome b560 subunit, mitochondrial	Q99643	1.7783e-09	4.70393e-07	-1.96086
MBP	Myelin basic protein	J3KS94	2.0843e-10	2.50189e-07	-1.73562
CLUH		K7EIG1	2.96292e-09	5.2903e-07	-1.64828
CCDC160	Coiled-coil domain-containing protein 160	A6NGH7	6.9973e-09	7.24272e-07	-1.63256
LRP1	Prolow-density lipoprotein receptor-related protein 1;Low-density lipoprotein receptor-related protein 1 85 kDa subunit;Low-density lipoprotein receptor-related protein 1 515 kDa subunit;Low-density lipoprotein receptor-related protein 1 intracellular domain	Q07954	3.6219e-06	2.94413e-05	-1.61295
[truncated: 2,670 more rows]

## Sheet: UP
GENE	PROTEIN	UNIPROT	P.VALUE	ADJ.P.VAL	LOGFC
TUBA1B	Tubulin alpha-1B chain	P68363	1.88635e-08	1.23599e-06	1.81065
HIST3H2BB	Histone H2B type 3-B	Q8N257	3.14435e-07	5.64245e-06	1.74173
[truncated: 2,028 more rows]
