# Supplementary material for: Loss of G-Protein Pathway Suppressor 2 Promotes Tumor Growth Through Activation of AKT Signaling
Source: Front Cell Dev Biol. 2021 Jan 7;8:608044. doi: 10.3389/fcell.2020.608044 (PMC7817781; doi:10.3389/fcell.2020.608044)
Supplement: Supplementary file 9 [file Table_4.XLSX]

## Sheet: Known sites UP&DOWN
FEATURE	G11	G12	G16	G21	G22	WT1	WT2	WT3	WT4	WT5	GENE	PROTEIN	UNIPROT	MAXFC	P.VALUE	ADJ.P.VAL	LOGFC	UNIPROT_FUNCTION	UNIPROT_CELLULAR_LOCATION	UNIPROT_DISEASE	GO_BIOLOGICAL_PROCESS	GO_MOLECULAR_FUNCTION	GO_CELLULAR_COMPONENT	GO_ID	REACTOMEID	KEGG_ID	PROTEINS	LOCALIZATION PROBABILITY	SITE PROBABILITIES	AMINO ACID	PEPTIDE SEQUENCE	G11.1	G12.1	G16.1	G21.1	G22.1	WT1.1	WT2.1	WT3.1	WT4.1	WT5.1
PCBP1_Q15365	1.10828	1.12716	0.71348	-0.127169	0.7553	-0.620502	-0.373838	-0.141422	-0.250909	-2	PCBP1	Poly(rC)-binding protein 1	Q15365	1.03276	0.00304505	0.00685858	0.628937	FUNCTION: Single-stranded nucleic acid binding protein that binds preferentially to oligo dC. In case of infection by poliovirus, plays a role in initiation of viral RNA replication in concert with the viral protein 3CD (PubMed:12414943). {ECO:0000269|PubMed:12414943}.	SUBCELLULAR LOCATION: Nucleus. Cytoplasm. Note=Loosely bound in the nucleus. May shuttle between the nucleus and the cytoplasm.		mRNA splicing, via spliceosome [GO:0000398]; positive regulation of transcription by RNA polymerase II [GO:0045944]; RNA metabolic process [GO:0016070]; viral RNA genome replication [GO:0039694]	cadherin binding [GO:0045296]; DNA-binding transcription factor activity, RNA polymerase II-specific [GO:0000981]; mRNA binding [GO:0003729]; RNA binding [GO:0003723]; sequence-specific single stranded DNA binding [GO:0098847]; single-stranded DNA binding [GO:0003697]	cytoplasm [GO:0005737]; cytoplasmic ribonucleoprotein granule [GO:0036464]; cytosol [GO:0005829]; extracellular exosome [GO:0070062]; membrane [GO:0016020]; nuclear speck [GO:0016607]; nucleoplasm [GO:0005654]	GO:0000398; GO:0000981; GO:0003697; GO:0003723; GO:0003729; GO:0005654; GO:0005737; GO:0005829; GO:0016020; GO:0016070; GO:0016607; GO:0036464; GO:0039694; GO:0045296; GO:0045944; GO:0070062; GO:0098847	R-HSA-72163;R-HSA-72203;	hsa:5093;	Q15365	0.999965	QICLVMLETLSQS(1)PQGR	S173	CVKQICLVMLETLSQSPQGRVMTIPYQPMPA	20.0005	20.0088	19.8269	19.4574	19.8453	19.2405	19.349	19.4511	19.403	18.5505
JUN_P05412.3	0.560132	0.623279	1.25398	1.09994	0.869669	-0.459331	-0.617445	-0.818316	-0.842187	-1.66972	JUN	Transcription factor AP-1	P05412	1.03096	2.06094e-05	0.000128556	0.59274	FUNCTION: Transcription factor that recognizes and binds to the enhancer heptamer motif 5'-TGA[CG]TCA-3' (PubMed:10995748, PubMed:22083952). Promotes activity of NR5A1 when phosphorylated by HIPK3 leading to increased steroidogenic gene expression upon cAMP signaling pathway stimulation (PubMed:17210646). Involved in activated KRAS-mediated transcriptional activation of USP28 in colorectal cancer…	SUBCELLULAR LOCATION: Nucleus.		aging [GO:0007568]; angiogenesis [GO:0001525]; axon regeneration [GO:0031103]; cellular response to cadmium ion [GO:0071276]; cellular response to calcium ion [GO:0071277]; cellular response to hormone stimulus [GO:0032870]; cellular response to potassium ion starvation [GO:0051365]; cellular response to reactive oxygen species [GO:0034614]; circadian rhythm [GO:0007623]; eyelid development in ca…	cAMP response element binding [GO:0035497]; chromatin binding [GO:0003682]; DNA binding [GO:0003677]; DNA-binding transcription activator activity, RNA polymerase II-specific [GO:0001228]; DNA-binding transcription factor activity [GO:0003700]; DNA-binding transcription factor activity, RNA polymerase II-specific [GO:0000981]; enzyme binding [GO:0019899]; GTPase activator activity [GO:0005096]; H…	cytosol [GO:0005829]; nuclear chromatin [GO:0000790]; nuclear chromosome [GO:0000228]; nuclear euchromatin [GO:0005719]; nucleoplasm [GO:0005654]; nucleus [GO:0005634]; transcriptional repressor complex [GO:0017053]; transcription factor AP-1 complex [GO:0035976]; transcription factor complex [GO:0005667]	GO:0000122; GO:0000228; GO:0000790; GO:0000976; GO:0000978; GO:0000980; GO:0000981; GO:0001102; GO:0001228; GO:0001525; GO:0001774; GO:0001836; GO:0001889; GO:0001938; GO:0003151; GO:0003677; GO:0003682; GO:0003700; GO:0003713; GO:0003723; GO:0005096; GO:0005634; GO:0005654; GO:0005667; GO:0005719; GO:0005829; GO:0006366; GO:0007179; GO:0007265; GO:0007568; GO:0007612; GO:0007623; GO:0008134; GO:…	R-HSA-1912408;R-HSA-2559580;R-HSA-2559582;R-HSA-2871796;R-HSA-450341;R-HSA-5617472;R-HSA-5687128;R-HSA-6796648;R-HSA-8862803;R-HSA-8943724;R-HSA-9018519;	hsa:3725;	P05412	0.869639	LQALKEEPQT(0.005)VPEMPGET(0.11)PPLS(0.87)PIDMES(0.015)QER	S243	EPQTVPEMPGETPPLSPIDMESQERIKAERK	19.6301	19.6513	19.8634	19.8116	19.7341	19.2873	19.2341	19.1666	19.1585	18.8803
EIF4B_E7EX17.17	1.49586	0.829619	0.470751	0.706749	0.830346	-0.84437	-0.97196	-0.416443	-0.490678	-1.60988	EIF4B	Eukaryotic translation initiation factor 4B	E7EX17	1.03615	4.66285e-05	0.000240086	0.569005					RNA binding [GO:0003723]	cytosol [GO:0005829]; dendrite [GO:0030425]; neuronal cell body [GO:0043025]; postsynapse [GO:0098794]	GO:0003723; GO:0005829; GO:0030425; GO:0043025; GO:0098794			E7EX17;P23588	0.941253	T(0.007)GS(0.036)ES(0.964)S(0.941)QT(0.03)GT(0.011)S(0.009)T(0.002)TSSR	S425	EETQERERSRTGSESSQTGTSTTSSRSKSDQ	16.5152	16.2965	16.1787	16.2562	16.2968	15.747	15.7051	15.8875	15.8631	15.4957
EIF4EBP1_Q13541.1	0.598515	0.773501	1.24315	0.920078	0.796713	-0.522247	-0.413054	-0.679472	-0.90024	-1.81694	EIF4EBP1	Eukaryotic translation initiation factor 4E-binding protein 1	Q13541	1.01769	0.000254683	0.000901167	0.364561										Q13541	0.94035	VVLGDGVQLPPGDY(0.491)S(0.149)T(0.168)T(0.188)PGGT(0.004)LFS(0.012)T(0.047)T(0.94)PGGTRIIYDRK	T46	PGDYSTTPGGTLFSTTPGGTRIIYDRKFLME	20.9171	20.9539	21.0527	20.9847	20.9588	20.6813	20.7042	20.6482	20.6017	20.4089
RSF1_Q96T23.8	2	0.805456	0.0885034	0.0937086	0.265864	-0.190379	-0.875713	-1.02931	-0.963304	-0.483787	RSF1	Remodeling and spacing factor 1	Q96T23	1.02187	0.0063519	0.0126916	0.345253	FUNCTION: Required for assembly of regular nucleosome arrays by the RSF chromatin-remodeling complex (PubMed:12972596). Facilitates transcription of hepatitis B virus (HBV) genes by the pX transcription activator. In case of infection by HBV, together with pX, it represses TNF-alpha induced NF-kappa-B transcription activation. Represses transcription when artificially recruited to chromatin by fu…	SUBCELLULAR LOCATION: Nucleus {ECO:0000269|PubMed:11788598, ECO:0000269|PubMed:11944984, ECO:0000269|PubMed:12972596}.		CENP-A containing nucleosome assembly [GO:0034080]; chromatin remodeling [GO:0006338]; DNA-templated transcription, initiation [GO:0006352]; negative regulation of DNA binding [GO:0043392]; negative regulation of transcription, DNA-templated [GO:0045892]; nucleosome assembly [GO:0006334]; nucleosome positioning [GO:0016584]; positive regulation of transcription, DNA-templated [GO:0045893]; positi…	histone acetyltransferase activity [GO:0004402]; histone binding [GO:0042393]; metal ion binding [GO:0046872]	histone acetyltransferase complex [GO:0000123]; nuclear chromatin [GO:0000790]; nucleoplasm [GO:0005654]; nucleus [GO:0005634]; RSF complex [GO:0031213]	GO:0000123; GO:0000790; GO:0004402; GO:0005634; GO:0005654; GO:0006334; GO:0006338; GO:0006352; GO:0016584; GO:0031213; GO:0034080; GO:0042393; GO:0043392; GO:0045892; GO:0045893; GO:0045944; GO:0046872; GO:0050434	R-HSA-606279;	hsa:51773;	Q96T23	1	STDEYS(1)EADEEEEEEEGKPSR	S1282	SKRSVRKRGRSTDEYSEADEEEEEEEGKPSR	16.5139	16.1525	15.9778	15.9791	16.021	15.9098	15.7429	15.7054	15.7215	15.8383
RPS6KB1_P23443.2	1.29296	-0.611736	0.613428	0.929152	0.50594	0.660735	0.388666	-1.11863	-1.12985	-1.53066	RPS6KB1	Ribosomal protein S6 kinase beta-1	P23443	1.02037	0.0446277	0.0676345	0.335719	FUNCTION: Serine/threonine-protein kinase that acts downstream of mTOR signaling in response to growth factors and nutrients to promote cell proliferation, cell growth and cell cycle progression. Regulates protein synthesis through phosphorylation of EIF4B, RPS6 and EEF2K, and contributes to cell survival by repressing the pro-apoptotic function of BAD. Under conditions of nutrient depletion, the…	SUBCELLULAR LOCATION: Cell junction, synapse, synaptosome {ECO:0000250}. Mitochondrion outer membrane. Mitochondrion. Note=Colocalizes with URI1 at mitochondrion.; SUBCELLULAR LOCATION: Isoform Alpha I: Nucleus. Cytoplasm.; SUBCELLULAR LOCATION: Isoform Alpha II: Cytoplasm.		aging [GO:0007568]; apoptotic process [GO:0006915]; behavioral fear response [GO:0001662]; cell migration [GO:0016477]; cellular response to dexamethasone stimulus [GO:0071549]; cellular response to growth factor stimulus [GO:0071363]; cellular response to insulin stimulus [GO:0032869]; cellular response to interferon-gamma [GO:0071346]; G1/S transition of mitotic cell cycle [GO:0000082]; germ ce…	ATP binding [GO:0005524]; identical protein binding [GO:0042802]; kinase activity [GO:0016301]; PDZ domain binding [GO:0030165]; peptide binding [GO:0042277]; protein kinase activity [GO:0004672]; protein phosphatase 2A binding [GO:0051721]; protein serine/threonine/tyrosine kinase activity [GO:0004712]; protein serine/threonine kinase activity [GO:0004674]; ribosomal protein S6 kinase activity […	cell junction [GO:0030054]; cell surface [GO:0009986]; cytoplasm [GO:0005737]; cytosol [GO:0005829]; mitochondrial outer membrane [GO:0005741]; mitochondrion [GO:0005739]; neuron projection [GO:0043005]; nucleoplasm [GO:0005654]; nucleus [GO:0005634]; perinuclear region of cytoplasm [GO:0048471]; synapse [GO:0045202]	GO:0000082; GO:0001662; GO:0003009; GO:0004672; GO:0004674; GO:0004711; GO:0004712; GO:0005524; GO:0005634; GO:0005654; GO:0005737; GO:0005739; GO:0005741; GO:0005829; GO:0006468; GO:0006915; GO:0007165; GO:0007281; GO:0007568; GO:0007584; GO:0007616; GO:0009408; GO:0009611; GO:0009612; GO:0009749; GO:0009986; GO:0014732; GO:0014878; GO:0014911; GO:0016301; GO:0016477; GO:0018105; GO:0030054; GO:…	R-HSA-166208;	hsa:6198;	P23443	0.779871	FIGS(0.287)PRT(0.714)PVS(0.78)PVKFS(0.22)PGDFWGR	S447	IRSPRRFIGSPRTPVSPVKFSPGDFWGRGAS	17.043	16.4574	16.8341	16.9312	16.8011	16.8486	16.765	16.3016	16.2981	16.1749
RPS6KB1_P23443.3	1.29296	-0.611736	0.613428	0.929152	0.50594	0.660735	0.388666	-1.11863	-1.12985	-1.53066	RPS6KB1	Ribosomal protein S6 kinase beta-1	P23443	1.02037	0.0446277	0.0676345	0.335719	FUNCTION: Serine/threonine-protein kinase that acts downstream of mTOR signaling in response to growth factors and nutrients to promote cell proliferation, cell growth and cell cycle progression. Regulates protein synthesis through phosphorylation of EIF4B, RPS6 and EEF2K, and contributes to cell survival by repressing the pro-apoptotic function of BAD. Under conditions of nutrient depletion, the…	SUBCELLULAR LOCATION: Cell junction, synapse, synaptosome {ECO:0000250}. Mitochondrion outer membrane. Mitochondrion. Note=Colocalizes with URI1 at mitochondrion.; SUBCELLULAR LOCATION: Isoform Alpha I: Nucleus. Cytoplasm.; SUBCELLULAR LOCATION: Isoform Alpha II: Cytoplasm.		aging [GO:0007568]; apoptotic process [GO:0006915]; behavioral fear response [GO:0001662]; cell migration [GO:0016477]; cellular response to dexamethasone stimulus [GO:0071549]; cellular response to growth factor stimulus [GO:0071363]; cellular response to insulin stimulus [GO:0032869]; cellular response to interferon-gamma [GO:0071346]; G1/S transition of mitotic cell cycle [GO:0000082]; germ ce…	ATP binding [GO:0005524]; identical protein binding [GO:0042802]; kinase activity [GO:0016301]; PDZ domain binding [GO:0030165]; peptide binding [GO:0042277]; protein kinase activity [GO:0004672]; protein phosphatase 2A binding [GO:0051721]; protein serine/threonine/tyrosine kinase activity [GO:0004712]; protein serine/threonine kinase activity [GO:0004674]; ribosomal protein S6 kinase activity […	cell junction [GO:0030054]; cell surface [GO:0009986]; cytoplasm [GO:0005737]; cytosol [GO:0005829]; mitochondrial outer membrane [GO:0005741]; mitochondrion [GO:0005739]; neuron projection [GO:0043005]; nucleoplasm [GO:0005654]; nucleus [GO:0005634]; perinuclear region of cytoplasm [GO:0048471]; synapse [GO:0045202]	GO:0000082; GO:0001662; GO:0003009; GO:0004672; GO:0004674; GO:0004711; GO:0004712; GO:0005524; GO:0005634; GO:0005654; GO:0005737; GO:0005739; GO:0005741; GO:0005829; GO:0006468; GO:0006915; GO:0007165; GO:0007281; GO:0007568; GO:0007584; GO:0007616; GO:0009408; GO:0009611; GO:0009612; GO:0009749; GO:0009986; GO:0014732; GO:0014878; GO:0014911; GO:0016301; GO:0016477; GO:0018105; GO:0030054; GO:…	R-HSA-166208;	hsa:6198;	P23443	0.713737	FIGS(0.287)PRT(0.714)PVS(0.78)PVKFS(0.22)PGDFWGR	T444	EPKIRSPRRFIGSPRTPVSPVKFSPGDFWGR	17.043	16.4574	16.8341	16.9312	16.8011	16.8486	16.765	16.3016	16.2981	16.1749
AKAP13_H0YMW2	1.00186	1.39234	0.326377	-1.34936	0.96968	-1.38834	-0.675674	0.239717	0.296308	-0.812908	AKAP13	A-kinase anchor protein 13	H0YMW2	1.01654	0.0992945	0.136533	0.245294				regulation of Rho protein signal transduction [GO:0035023]	cAMP-dependent protein kinase activity [GO:0004691]		GO:0004691; GO:0035023			H0YMW2;Q12802	0.968152	ALQLS(0.026)NS(0.968)PGAS(0.005)S(0.001)AFLK	S983	ISADCAKDKALQLSNSPGASSAFLKAETEHN	15.2112	15.3135	15.0343	14.5953	15.2028	14.5851	14.7718	15.0116	15.0264	14.7358
CTPS1_P17812.7	-0.39169	-0.0982456	0.193768	0.770415	0.423031	0.90978	0.760477	0.668974	-0.934209	-2	CTPS1	CTP synthase 1	P17812	1.00597	0.541806	0.601256	0.111905	FUNCTION: This enzyme is involved in the de novo synthesis of CTP, a precursor of DNA, RNA and phospholipids. Catalyzes the ATP-dependent amination of UTP to CTP with either L-glutamine or ammonia as a source of nitrogen. This enzyme and its product, CTP, play a crucial role in the proliferation of activated lymphocytes and therefore in immunity. {ECO:0000269|PubMed:16179339, ECO:0000269|PubMed:2…		DISEASE: Immunodeficiency 24 (IMD24) [MIM:615897]: A life-threatening immunodeficiency, characterized by an impaired capacity of activated T and B cells to proliferate in response to antigen receptor-mediated activation. Patients have early onset of severe chronic viral infections, mostly caused by herpes viruses, including EBV and varicella zooster virus (VZV), and also suffer from recurrent enc…	'de novo' CTP biosynthetic process [GO:0044210]; B cell proliferation [GO:0042100]; CTP biosynthetic process [GO:0006241]; glutamine metabolic process [GO:0006541]; nucleobase-containing compound metabolic process [GO:0006139]; nucleobase-containing small molecule interconversion [GO:0015949]; pyrimidine nucleobase biosynthetic process [GO:0019856]; response to drug [GO:0042493]; T cell prolifera…	ATP binding [GO:0005524]; CTP synthase activity [GO:0003883]; identical protein binding [GO:0042802]	cytoophidium [GO:0097268]; cytoplasm [GO:0005737]; cytosol [GO:0005829]; membrane [GO:0016020]	GO:0003883; GO:0005524; GO:0005737; GO:0005829; GO:0006139; GO:0006241; GO:0006541; GO:0015949; GO:0016020; GO:0019856; GO:0042098; GO:0042100; GO:0042493; GO:0042802; GO:0044210; GO:0097268	R-HSA-499943;	hsa:1503;	P17812	0.933082	DTYS(0.004)DRS(0.84)GS(0.153)S(0.057)S(0.933)PDS(0.011)EIT(0.001)ELKFPSINHD	S575	RLSPRDTYSDRSGSSSPDSEITELKFPSINH	18.6659	18.7574	18.8484	19.0282	18.9199	19.0717	19.0251	18.9966	18.4967	18.0702
UTP18_Q9Y5J1.6	-1.13046	0.559987	1.30192	0.26397	0.997533	-0.325634	-0.0958093	0.0851005	0.427504	-2	UTP18	U3 small nucleolar RNA-associated protein 18 homolog	Q9Y5J1	1.00498	0.239846	0.298934	0.103494	FUNCTION: Involved in nucleolar processing of pre-18S ribosomal RNA. {ECO:0000250}.	SUBCELLULAR LOCATION: Nucleus, nucleolus {ECO:0000269|PubMed:12429849}.		rRNA processing [GO:0006364]	RNA binding [GO:0003723]	nuclear membrane [GO:0031965]; nucleolus [GO:0005730]; nucleoplasm [GO:0005654]; nucleus [GO:0005634]; Pwp2p-containing subcomplex of 90S preribosome [GO:0034388]; small-subunit processome [GO:0032040]	GO:0003723; GO:0005634; GO:0005654; GO:0005730; GO:0006364; GO:0031965; GO:0032040; GO:0034388	R-HSA-6790901;R-HSA-6791226;	hsa:51096;	Q9Y5J1	0.993563	KT(0.082)S(0.951)S(0.994)DDES(0.973)EEDEDDLLQR	S206	GGVPAWAETTKRKTSSDDESEEDEDDLLQRT	20.6825	20.902	20.9983	20.8636	20.9588	20.787	20.8169	20.8403	20.8848	20.5587
AFAP1_Q8N556.4	-0.575269	1.25418	1.16555	-0.31735	0.0317114	-1.06354	-0.792905	-1.42341	0.431004	1.29004	AFAP1	Actin filament-associated protein 1	Q8N556	1.00416	0.379418	0.443217	0.0741872	FUNCTION: Can cross-link actin filaments into both network and bundle structures (By similarity). May modulate changes in actin filament integrity and induce lamellipodia formation. May function as an adapter molecule that links other proteins, such as SRC and PKC to the actin cytoskeleton. Seems to play a role in the development and progression of prostate adenocarcinoma by regulating cell-matri…	SUBCELLULAR LOCATION: Cytoplasm, cytoskeleton, stress fiber {ECO:0000269|PubMed:15485829}.		regulation of cytoskeleton organization [GO:0051493]; regulation of signal transduction [GO:0009966]	actin binding [GO:0003779]; SH2 domain binding [GO:0042169]; SH3 domain binding [GO:0017124]	actin cytoskeleton [GO:0015629]; cytosol [GO:0005829]; focal adhesion [GO:0005925]	GO:0003779; GO:0005829; GO:0005925; GO:0009966; GO:0015629; GO:0017124; GO:0042169; GO:0051493		hsa:60312;	Q8N556	0.933387	KKPST(0.001)DEQT(0.229)S(0.831)S(0.933)AEEDVPT(0.005)CGYLNVLSNSR	S343	ISLGKKKPSTDEQTSSAEEDVPTCGYLNVLS	17.7944	18.0121	18.0015	17.8251	17.8666	17.7363	17.7685	17.6935	17.9141	18.0163
EIF4EBP2_Q13542.3	-0.348204	-0.13968	0.975681	1.60463	-0.895453	0.690639	0.129881	0.56317	-0.848929	-1.73174	EIF4EBP2	Eukaryotic translation initiation factor 4E-binding protein 2	Q13542	1.0021	0.561488	0.620035	0.0418147										Q13542	0.907011	TVAISDAAQLPHDY(0.008)CT(0.912)T(0.081)PGGT(0.004)LFS(0.007)T(0.079)T(0.907)PGGT(0.001)RIIYDRK	T46	PHDYCTTPGGTLFSTTPGGTRIIYDRKFLLD	19.9211	19.9393	20.0367	20.0916	19.8733	20.0118	19.9628	20.0006	19.8773	19.8002
NUMA1_A0A087WY61.11	1.11966	-0.983962	1.10095	0.323148	-0.894027	1.26125	-0.128962	-1.3513	-0.974774	0.528023	NUMA1	Nuclear mitotic apparatus protein 1	A0A087WY61	1.00235	0.68985	0.737148	0.0397988						cytosol [GO:0005829]; Golgi membrane [GO:0000139]; nucleoplasm [GO:0005654]	GO:0000139; GO:0005654; GO:0005829			A0A087WY61;Q14980;H0YFY6	0.999784	KRVS(1)LEPHQGPGT(0.977)PES(0.023)K	S1975	AEGTGITTRQQRKRVSLEPHQGPGTPESKKA	17.1035	16.7891	17.1007	16.9845	16.8026	17.1247	16.9169	16.7342	16.7905	17.0151
NUMA1_A0A087WY61.17	1.11966	-0.983962	1.10095	0.323148	-0.894027	1.26125	-0.128962	-1.3513	-0.974774	0.528023	NUMA1	Nuclear mitotic apparatus protein 1	A0A087WY61	1.00235	0.68985	0.737148	0.0397988						cytosol [GO:0005829]; Golgi membrane [GO:0000139]; nucleoplasm [GO:0005654]	GO:0000139; GO:0005654; GO:0005829			A0A087WY61;Q14980;H0YFY6	0.977431	KRVS(1)LEPHQGPGT(0.977)PES(0.023)K	T1984	QQRKRVSLEPHQGPGTPESKKATSCFPRPMT	17.1035	16.7891	17.1007	16.9845	16.8026	17.1247	16.9169	16.7342	16.7905	17.0151
BAG3_O95817.16	-0.31607	0.846228	0.240597	-1.92593	0.0700741	1.49894	0.975324	-0.674938	0.144548	-0.858775	BAG3	BAG family molecular chaperone regulator 3	O95817	1.00362	0.539546	0.599355	-0.0532704	FUNCTION: Co-chaperone for HSP70 and HSC70 chaperone proteins. Acts as a nucleotide-exchange factor (NEF) promoting the release of ADP from the HSP70 and HSC70 proteins thereby triggering client/substrate protein release. Nucleotide release is mediated via its binding to the nucleotide-binding domain (NBD) of HSPA8/HSC70 where as the substrate release is mediated via its binding to the substrate-…	SUBCELLULAR LOCATION: Nucleus {ECO:0000269|PubMed:26159920}. Cytoplasm {ECO:0000269|PubMed:26159920}. Note=Colocalizes with HSF1 to the nucleus upon heat stress (PubMed:26159920). {ECO:0000269|PubMed:26159920}.	DISEASE: Myopathy, myofibrillar, 6 (MFM6) [MIM:612954]: A form of myofibrillar myopathy, a group of chronic neuromuscular disorders characterized at ultrastructural level by disintegration of the sarcomeric Z disk and myofibrils, and replacement of the normal myofibrillar markings by small dense granules, or larger hyaline masses, or amorphous material. MFM6 is characterized by early-onset of sev…	aggresome assembly [GO:0070842]; autophagosome assembly [GO:0000045]; brain development [GO:0007420]; cellular response to heat [GO:0034605]; cellular response to mechanical stimulus [GO:0071260]; cellular response to unfolded protein [GO:0034620]; chaperone-mediated autophagy [GO:0061684]; chaperone-mediated protein transport [GO:0072321]; extrinsic apoptotic signaling pathway in absence of liga…	adenyl-nucleotide exchange factor activity [GO:0000774]; cadherin binding [GO:0045296]; chaperone binding [GO:0051087]; dynein intermediate chain binding [GO:0045505]; protein-containing complex binding [GO:0044877]	aggresome [GO:0016235]; cell [GO:0005623]; chaperone complex [GO:0101031]; cytoplasm [GO:0005737]; cytosol [GO:0005829]; neuron projection [GO:0043005]; nucleus [GO:0005634]; plasma membrane [GO:0005886]; stress fiber [GO:0001725]; Z disc [GO:0030018]	GO:0000045; GO:0000774; GO:0001725; GO:0005623; GO:0005634; GO:0005737; GO:0005829; GO:0005886; GO:0006457; GO:0007420; GO:0008625; GO:0010664; GO:0016235; GO:0021510; GO:0030018; GO:0034605; GO:0034620; GO:0042307; GO:0043005; GO:0043066; GO:0044877; GO:0045296; GO:0045505; GO:0046716; GO:0046827; GO:0050821; GO:0051087; GO:0061684; GO:0070842; GO:0071260; GO:0072321; GO:0097192; GO:0097201; GO:…	R-HSA-3371453;	hsa:9531;	O95817;C9JFK9	0.837512	S(0.089)S(0.117)T(0.794)PLHS(0.838)PS(0.162)PIR	S289	SSREGSPARSSTPLHSPSPIRVHTVVDRPQQ	14.7203	14.863	14.7886	14.5227	14.7677	14.9431	14.8788	14.6763	14.7768	14.6537
BAG3_O95817.19	-0.31607	0.846228	0.240597	-1.92593	0.0700741	1.49894	0.975324	-0.674938	0.144548	-0.858775	BAG3	BAG family molecular chaperone regulator 3	O95817	1.00362	0.539546	0.599355	-0.0532704	FUNCTION: Co-chaperone for HSP70 and HSC70 chaperone proteins. Acts as a nucleotide-exchange factor (NEF) promoting the release of ADP from the HSP70 and HSC70 proteins thereby triggering client/substrate protein release. Nucleotide release is mediated via its binding to the nucleotide-binding domain (NBD) of HSPA8/HSC70 where as the substrate release is mediated via its binding to the substrate-…	SUBCELLULAR LOCATION: Nucleus {ECO:0000269|PubMed:26159920}. Cytoplasm {ECO:0000269|PubMed:26159920}. Note=Colocalizes with HSF1 to the nucleus upon heat stress (PubMed:26159920). {ECO:0000269|PubMed:26159920}.	DISEASE: Myopathy, myofibrillar, 6 (MFM6) [MIM:612954]: A form of myofibrillar myopathy, a group of chronic neuromuscular disorders characterized at ultrastructural level by disintegration of the sarcomeric Z disk and myofibrils, and replacement of the normal myofibrillar markings by small dense granules, or larger hyaline masses, or amorphous material. MFM6 is characterized by early-onset of sev…	aggresome assembly [GO:0070842]; autophagosome assembly [GO:0000045]; brain development [GO:0007420]; cellular response to heat [GO:0034605]; cellular response to mechanical stimulus [GO:0071260]; cellular response to unfolded protein [GO:0034620]; chaperone-mediated autophagy [GO:0061684]; chaperone-mediated protein transport [GO:0072321]; extrinsic apoptotic signaling pathway in absence of liga…	adenyl-nucleotide exchange factor activity [GO:0000774]; cadherin binding [GO:0045296]; chaperone binding [GO:0051087]; dynein intermediate chain binding [GO:0045505]; protein-containing complex binding [GO:0044877]	aggresome [GO:0016235]; cell [GO:0005623]; chaperone complex [GO:0101031]; cytoplasm [GO:0005737]; cytosol [GO:0005829]; neuron projection [GO:0043005]; nucleus [GO:0005634]; plasma membrane [GO:0005886]; stress fiber [GO:0001725]; Z disc [GO:0030018]	GO:0000045; GO:0000774; GO:0001725; GO:0005623; GO:0005634; GO:0005737; GO:0005829; GO:0005886; GO:0006457; GO:0007420; GO:0008625; GO:0010664; GO:0016235; GO:0021510; GO:0030018; GO:0034605; GO:0034620; GO:0042307; GO:0043005; GO:0043066; GO:0044877; GO:0045296; GO:0045505; GO:0046716; GO:0046827; GO:0050821; GO:0051087; GO:0061684; GO:0070842; GO:0071260; GO:0072321; GO:0097192; GO:0097201; GO:…	R-HSA-3371453;	hsa:9531;	O95817;C9JFK9	0.79426	S(0.089)S(0.117)T(0.794)PLHS(0.838)PS(0.162)PIR	T285	VQGASSREGSPARSSTPLHSPSPIRVHTVVD	14.7203	14.863	14.7886	14.5227	14.7677	14.9431	14.8788	14.6763	14.7768	14.6537
TCOF1_E7ETY2.2	0.448195	-0.823129	-0.55886	1.0457	-1.26709	0.948398	0.120705	-0.585874	-1.01072	1.68268	TCOF1	Treacle protein	E7ETY2	1.00542	0.460989	0.52482	-0.0867621						cytosol [GO:0005829]; fibrillar center [GO:0001650]; nucleoplasm [GO:0005654]	GO:0001650; GO:0005654; GO:0005829			E7ETY2;Q13428;J3KQ96	0.999267	ASSVST(0.001)KES(0.999)PARK	S233	VKPAQVKASSVSTKESPARKAAPAPGKVGDV	16.1294	15.8907	15.9403	16.2416	15.8073	16.2233	16.0679	15.9353	15.8555	16.3612
MAP1B_P46821.54	0.132711	-2	-0.241968	1.72266	-0.48865	0.825624	-0.148518	-0.26246	-0.0703773	0.654909	MAP1B	Microtubule-associated protein 1B;MAP1B heavy chain;MAP1 light chain LC1	P46821	1.00492	0.510804	0.573652	-0.0914217	FUNCTION: Facilitates tyrosination of alpha-tubulin in neuronal microtubules (By similarity). Phosphorylated MAP1B may play a role in the cytoskeletal changes that accompany neurite extension. Possibly MAP1B binds to at least two tubulin subunits in the polymer, and this bridging of subunits might be involved in nucleating microtubule polymerization and in stabilizing microtubules. Acts as a posi…	SUBCELLULAR LOCATION: Cytoplasm, cytoskeleton {ECO:0000269|PubMed:18195017}. Cytoplasm {ECO:0000269|PubMed:18195017}. Cell junction, synapse {ECO:0000250}. Cell projection, dendritic spine {ECO:0000250}. Note=Colocalizes with DAPK1 in the microtubules and cortical actin fibers. {ECO:0000250}.; SUBCELLULAR LOCATION: MAP1 light chain LC1: Cytoplasm {ECO:0000250|UniProtKB:P14873}.		axon extension [GO:0048675]; axonogenesis [GO:0007409]; cellular process [GO:0009987]; cellular response to growth factor stimulus [GO:0071363]; cellular response to peptide hormone stimulus [GO:0071375]; dendrite development [GO:0016358]; developmental maturation [GO:0021700]; establishment of monopolar cell polarity [GO:0061162]; induction of synaptic plasticity by chemical substance [GO:005191…	actin binding [GO:0003779]; microtubule binding [GO:0008017]; phospholipid binding [GO:0005543]; protein-containing complex binding [GO:0044877]; structural molecule activity [GO:0005198]; tubulin binding [GO:0015631]	apical dendrite [GO:0097440]; axon [GO:0030424]; basal dendrite [GO:0097441]; cell junction [GO:0030054]; cell projection [GO:0042995]; cytosol [GO:0005829]; dendrite [GO:0030425]; dendritic spine [GO:0043197]; growth cone [GO:0030426]; hippocampal mossy fiber [GO:0097457]; microtubule [GO:0005874]; microtubule associated complex [GO:0005875]; neuronal cell body [GO:0043025]; perikaryon [GO:00432…	GO:0000226; GO:0001578; GO:0001750; GO:0001764; GO:0003779; GO:0005198; GO:0005543; GO:0005829; GO:0005874; GO:0005875; GO:0005886; GO:0007026; GO:0007409; GO:0007416; GO:0008017; GO:0009612; GO:0009743; GO:0009987; GO:0010035; GO:0014012; GO:0014069; GO:0015631; GO:0016358; GO:0017085; GO:0021700; GO:0030054; GO:0030424; GO:0030425; GO:0030426; GO:0031114; GO:0031116; GO:0032355; GO:0032387; GO:…		hsa:4131;	P46821	0.994518	ES(0.005)S(0.995)PLYS(0.999)PT(0.001)FSDSTSAVK	S1793	LSPKSDISPLTPRESSPLYSPTFSDSTSAVK	18.662	18.1458	18.5763	19.0257	18.5199	18.8205	18.5977	18.5716	18.6156	18.7815
MAP1B_P46821.55	0.132711	-2	-0.241968	1.72266	-0.48865	0.825624	-0.148518	-0.26246	-0.0703773	0.654909	MAP1B	Microtubule-associated protein 1B;MAP1B heavy chain;MAP1 light chain LC1	P46821	1.00492	0.510804	0.573652	-0.0914217	FUNCTION: Facilitates tyrosination of alpha-tubulin in neuronal microtubules (By similarity). Phosphorylated MAP1B may play a role in the cytoskeletal changes that accompany neurite extension. Possibly MAP1B binds to at least two tubulin subunits in the polymer, and this bridging of subunits might be involved in nucleating microtubule polymerization and in stabilizing microtubules. Acts as a posi…	SUBCELLULAR LOCATION: Cytoplasm, cytoskeleton {ECO:0000269|PubMed:18195017}. Cytoplasm {ECO:0000269|PubMed:18195017}. Cell junction, synapse {ECO:0000250}. Cell projection, dendritic spine {ECO:0000250}. Note=Colocalizes with DAPK1 in the microtubules and cortical actin fibers. {ECO:0000250}.; SUBCELLULAR LOCATION: MAP1 light chain LC1: Cytoplasm {ECO:0000250|UniProtKB:P14873}.		axon extension [GO:0048675]; axonogenesis [GO:0007409]; cellular process [GO:0009987]; cellular response to growth factor stimulus [GO:0071363]; cellular response to peptide hormone stimulus [GO:0071375]; dendrite development [GO:0016358]; developmental maturation [GO:0021700]; establishment of monopolar cell polarity [GO:0061162]; induction of synaptic plasticity by chemical substance [GO:005191…	actin binding [GO:0003779]; microtubule binding [GO:0008017]; phospholipid binding [GO:0005543]; protein-containing complex binding [GO:0044877]; structural molecule activity [GO:0005198]; tubulin binding [GO:0015631]	apical dendrite [GO:0097440]; axon [GO:0030424]; basal dendrite [GO:0097441]; cell junction [GO:0030054]; cell projection [GO:0042995]; cytosol [GO:0005829]; dendrite [GO:0030425]; dendritic spine [GO:0043197]; growth cone [GO:0030426]; hippocampal mossy fiber [GO:0097457]; microtubule [GO:0005874]; microtubule associated complex [GO:0005875]; neuronal cell body [GO:0043025]; perikaryon [GO:00432…	GO:0000226; GO:0001578; GO:0001750; GO:0001764; GO:0003779; GO:0005198; GO:0005543; GO:0005829; GO:0005874; GO:0005875; GO:0005886; GO:0007026; GO:0007409; GO:0007416; GO:0008017; GO:0009612; GO:0009743; GO:0009987; GO:0010035; GO:0014012; GO:0014069; GO:0015631; GO:0016358; GO:0017085; GO:0021700; GO:0030054; GO:0030424; GO:0030425; GO:0030426; GO:0031114; GO:0031116; GO:0032355; GO:0032387; GO:…		hsa:4131;	P46821	0.999453	ES(0.005)S(0.995)PLYS(0.999)PT(0.001)FSDSTSAVK	S1797	SDISPLTPRESSPLYSPTFSDSTSAVKEKTA	18.662	18.1458	18.5763	19.0257	18.5199	18.8205	18.5977	18.5716	18.6156	18.7815
CTPS1_P17812.12	-0.890467	-0.554348	-0.602953	0.305805	-0.238879	1.13646	1.25605	1.48291	-0.436067	-1.45851	CTPS1	CTP synthase 1	P17812	1.01074	0.176034	0.227607	-0.189577	FUNCTION: This enzyme is involved in the de novo synthesis of CTP, a precursor of DNA, RNA and phospholipids. Catalyzes the ATP-dependent amination of UTP to CTP with either L-glutamine or ammonia as a source of nitrogen. This enzyme and its product, CTP, play a crucial role in the proliferation of activated lymphocytes and therefore in immunity. {ECO:0000269|PubMed:16179339, ECO:0000269|PubMed:2…		DISEASE: Immunodeficiency 24 (IMD24) [MIM:615897]: A life-threatening immunodeficiency, characterized by an impaired capacity of activated T and B cells to proliferate in response to antigen receptor-mediated activation. Patients have early onset of severe chronic viral infections, mostly caused by herpes viruses, including EBV and varicella zooster virus (VZV), and also suffer from recurrent enc…	'de novo' CTP biosynthetic process [GO:0044210]; B cell proliferation [GO:0042100]; CTP biosynthetic process [GO:0006241]; glutamine metabolic process [GO:0006541]; nucleobase-containing compound metabolic process [GO:0006139]; nucleobase-containing small molecule interconversion [GO:0015949]; pyrimidine nucleobase biosynthetic process [GO:0019856]; response to drug [GO:0042493]; T cell prolifera…	ATP binding [GO:0005524]; CTP synthase activity [GO:0003883]; identical protein binding [GO:0042802]	cytoophidium [GO:0097268]; cytoplasm [GO:0005737]; cytosol [GO:0005829]; membrane [GO:0016020]	GO:0003883; GO:0005524; GO:0005737; GO:0005829; GO:0006139; GO:0006241; GO:0006541; GO:0015949; GO:0016020; GO:0019856; GO:0042098; GO:0042100; GO:0042493; GO:0042802; GO:0044210; GO:0097268	R-HSA-499943;	hsa:1503;	P17812	0.933082	DTYS(0.004)DRS(0.84)GS(0.153)S(0.057)S(0.933)PDS(0.011)EIT(0.001)ELKFPSINHD	S575	RLSPRDTYSDRSGSSSPDSEITELKFPSINH	17.5372	17.6176	17.6059	17.8234	17.6931	18.0221	18.0507	18.105	17.6459	17.4012
DNMT1_P26358	-0.309598	-0.0939077	-0.731725	-2	-0.117991	0.023774	0.48359	1.25924	1.412	0.194581	DNMT1	DNA (cytosine-5)-methyltransferase 1	P26358	1.01014	0.0247491	0.0403042	-0.200836	FUNCTION: Methylates CpG residues. Preferentially methylates hemimethylated DNA. Associates with DNA replication sites in S phase maintaining the methylation pattern in the newly synthesized strand, that is essential for epigenetic inheritance. Associates with chromatin during G2 and M phases to maintain DNA methylation independently of replication. It is responsible for maintaining methylation p…	SUBCELLULAR LOCATION: Nucleus {ECO:0000269|PubMed:12145218}.	DISEASE: Neuropathy, hereditary sensory, 1E (HSN1E) [MIM:614116]: A neurodegenerative disorder characterized by adult onset of progressive peripheral sensory loss associated with progressive hearing impairment and early-onset dementia. {ECO:0000269|PubMed:21532572}. Note=The disease is caused by mutations affecting the gene represented in this entry.; DISEASE: Cerebellar ataxia, deafness, and nar…	cellular response to amino acid stimulus [GO:0071230]; chromatin organization [GO:0006325]; DNA methylation [GO:0006306]; DNA methylation involved in embryo development [GO:0043045]; DNA methylation on cytosine within a CG sequence [GO:0010424]; gene silencing [GO:0016458]; maintenance of DNA methylation [GO:0010216]; negative regulation of gene expression [GO:0010629]; negative regulation of gen…	DNA (cytosine-5-)-methyltransferase activity [GO:0003886]; DNA binding [GO:0003677]; DNA-methyltransferase activity [GO:0009008]; methyl-CpG binding [GO:0008327]; promoter-specific chromatin binding [GO:1990841]; RNA binding [GO:0003723]; zinc ion binding [GO:0008270]	nucleoplasm [GO:0005654]; nucleus [GO:0005634]; pericentric heterochromatin [GO:0005721]; replication fork [GO:0005657]	GO:0000122; GO:0003677; GO:0003723; GO:0003886; GO:0005634; GO:0005654; GO:0005657; GO:0005721; GO:0006306; GO:0006325; GO:0007265; GO:0008270; GO:0008327; GO:0009008; GO:0010216; GO:0010424; GO:0010628; GO:0010629; GO:0016458; GO:0043045; GO:0045814; GO:0051571; GO:0051573; GO:0071230; GO:0090309; GO:1904707; GO:1905460; GO:1905931; GO:1990841	R-HSA-212300;R-HSA-427413;R-HSA-4655427;R-HSA-5334118;	hsa:1786;	P26358	1	RCPNMAMKEADDDEEVDDNIPEMPS(1)PK	S714	ADDDEEVDDNIPEMPSPKKMHQGKKKKQNKN	19.8574	19.8896	19.7946	19.588	19.886	19.9071	19.9755	20.091	20.1137	19.9325
LARP1_Q6PKG0.24	-1.63593	-0.752343	-0.672578	0.147378	-1.18962	1.17828	1.15274	0.854388	0.469473	0.448216	LARP1	La-related protein 1	Q6PKG0	1.0104	0.00642177	0.0128019	-0.207887	FUNCTION: RNA-binding protein that regulates the translation of specific target mRNA species downstream of the mTORC1 complex, in function of growth signals and nutrient availability (PubMed:20430826, PubMed:23711370, PubMed:24532714, PubMed:25940091, PubMed:28650797, PubMed:28673543, PubMed:29244122). Interacts on the one hand with the 3' poly-A tails that are present in all mRNA molecules, and …	SUBCELLULAR LOCATION: Cytoplasm {ECO:0000269|PubMed:20430826, ECO:0000269|PubMed:24532714, ECO:0000269|PubMed:28650797}. Cytoplasmic granule {ECO:0000269|PubMed:24532714, ECO:0000269|PubMed:25940091}. Note=Colocalizes with RPTOR and PABPC1 in cytoplasmic granules that resemble stress granules. {ECO:0000269|PubMed:24532714, ECO:0000269|PubMed:25940091}.		cell population proliferation [GO:0008283]; cellular response to rapamycin [GO:0072752]; mRNA stabilization [GO:0048255]; negative regulation of translation [GO:0017148]; negative regulation of translational initiation [GO:0045947]; positive regulation of macroautophagy [GO:0016239]; positive regulation of viral genome replication [GO:0045070]; response to amino acid starvation [GO:1990928]; TORC…	cadherin binding [GO:0045296]; eukaryotic initiation factor 4E binding [GO:0008190]; mRNA 3'-UTR binding [GO:0003730]; mRNA 5'-UTR binding [GO:0048027]; ribosomal small subunit binding [GO:0043024]; RNA 7-methylguanosine cap binding [GO:0000340]; RNA binding [GO:0003723]; RNA cap binding [GO:0000339]; translation activator activity [GO:0008494]; translation initiation factor binding [GO:0031369]	cytoplasm [GO:0005737]; cytoplasmic stress granule [GO:0010494]; membrane [GO:0016020]	GO:0000339; GO:0000340; GO:0003723; GO:0003730; GO:0005737; GO:0006413; GO:0008190; GO:0008283; GO:0008494; GO:0010494; GO:0016020; GO:0016239; GO:0017148; GO:0031369; GO:0031929; GO:0038202; GO:0043024; GO:0045070; GO:0045296; GO:0045947; GO:0048027; GO:0048255; GO:0072752; GO:1990928		hsa:23367;	Q6PKG0;A0A0B4J210;E5RH50;H0YC33	0.920088	LFGAPEPS(0.002)T(0.002)IARS(0.92)LPT(0.076)T(0.205)VPES(0.795)PNYR	S766	ANKLFGAPEPSTIARSLPTTVPESPNYRNTR	19.8883	20.0002	20.0103	20.1142	19.9449	20.2448	20.2416	20.2038	20.155	20.1523
SRRM2_Q9UQ35.227	-1.33352	-0.797505	-0.00266256	-0.541414	-1.50144	0.954791	0.869301	0.355273	0.644772	1.3524	SRRM2	Serine/arginine repetitive matrix protein 2	Q9UQ35	1.01318	0.00480194	0.0100019	-0.215247	FUNCTION: Required for pre-mRNA splicing as component of the spliceosome. {ECO:0000269|PubMed:19854871, ECO:0000269|PubMed:28076346, ECO:0000269|PubMed:28502770, ECO:0000269|PubMed:29301961, ECO:0000269|PubMed:29360106, ECO:0000269|PubMed:29361316, ECO:0000269|PubMed:30705154, ECO:0000269|PubMed:9531537}.	SUBCELLULAR LOCATION: Nucleus {ECO:0000269|PubMed:28076346, ECO:0000269|PubMed:28502770, ECO:0000269|PubMed:29301961, ECO:0000269|PubMed:29360106, ECO:0000269|PubMed:29361316, ECO:0000269|PubMed:30705154}. Nucleus speckle {ECO:0000269|PubMed:9531537}.		mRNA splicing, via spliceosome [GO:0000398]	C2H2 zinc finger domain binding [GO:0070742]; mRNA binding [GO:0003729]; protein N-terminus binding [GO:0047485]; RNA binding [GO:0003723]	Cajal body [GO:0015030]; catalytic step 2 spliceosome [GO:0071013]; nuclear speck [GO:0016607]; nucleoplasm [GO:0005654]; nucleus [GO:0005634]; U2-type catalytic step 2 spliceosome [GO:0071007]; U2-type precatalytic spliceosome [GO:0071005]	GO:0000398; GO:0003723; GO:0003729; GO:0005634; GO:0005654; GO:0015030; GO:0016607; GO:0047485; GO:0070742; GO:0071005; GO:0071007; GO:0071013	R-HSA-72163;	hsa:23524;	Q9UQ35	0.894461	NHS(0.922)GS(0.894)RT(0.183)PPVALNSSR	S2102	RSRSATPPATRNHSGSRTPPVALNSSRMSCF	16.2723	16.3413	16.4437	16.3743	16.2506	16.5671	16.5561	16.4899	16.5272	16.6183
CAD_P27708	0.489281	-1.10121	-1.29205	0.367731	-1.40069	0.880648	0.166031	0.130624	0.0392573	1.72037	CAD	CAD protein;Glutamine-dependent carbamoyl-phosphate synthase;Aspartate carbamoyltransferase;Dihydroorotase	P27708	1.01428	0.0384401	0.0592722	-0.243387	FUNCTION: This protein is a 'fusion' protein encoding four enzymatic activities of the pyrimidine pathway (GATase, CPSase, ATCase and DHOase). {ECO:0000269|PubMed:24332717}.	SUBCELLULAR LOCATION: Cytoplasm {ECO:0000269|PubMed:15890648}. Nucleus {ECO:0000269|PubMed:15890648}. Note=Cytosolic and unphosphorylated in resting cells, translocates to the nucleus in response to EGF stimulation, nuclear import promotes optimal cell growth.	DISEASE: Epileptic encephalopathy, early infantile, 50 (EIEE50) [MIM:616457]: A form of epileptic encephalopathy, a heterogeneous group of severe childhood onset epilepsies characterized by refractory seizures, neurodevelopmental impairment, and poor prognosis. Development is normal prior to seizure onset, after which cognitive and motor delays become apparent. EIEE50 is an autosomal recessive, p…	'de novo' pyrimidine nucleobase biosynthetic process [GO:0006207]; 'de novo' UMP biosynthetic process [GO:0044205]; animal organ regeneration [GO:0031100]; cellular response to drug [GO:0035690]; cellular response to epidermal growth factor stimulus [GO:0071364]; citrulline biosynthetic process [GO:0019240]; drug metabolic process [GO:0017144]; female pregnancy [GO:0007565]; glutamine metabolic p…	aspartate binding [GO:0070335]; aspartate carbamoyltransferase activity [GO:0004070]; ATP binding [GO:0005524]; carbamoyl-phosphate synthase (glutamine-hydrolyzing) activity [GO:0004088]; dihydroorotase activity [GO:0004151]; enzyme binding [GO:0019899]; identical protein binding [GO:0042802]; protein kinase activity [GO:0004672]; zinc ion binding [GO:0008270]	cell projection [GO:0042995]; cytoplasm [GO:0005737]; cytosol [GO:0005829]; extracellular exosome [GO:0070062]; membrane [GO:0016020]; neuronal cell body [GO:0043025]; nuclear matrix [GO:0016363]; nucleoplasm [GO:0005654]; nucleus [GO:0005634]; protein-containing complex [GO:0032991]; terminal bouton [GO:0043195]	GO:0001889; GO:0004070; GO:0004088; GO:0004151; GO:0004672; GO:0005524; GO:0005634; GO:0005654; GO:0005737; GO:0005829; GO:0006207; GO:0006228; GO:0006541; GO:0006807; GO:0007507; GO:0007565; GO:0007595; GO:0008270; GO:0014075; GO:0016020; GO:0016363; GO:0017144; GO:0018107; GO:0019240; GO:0019899; GO:0031000; GO:0031100; GO:0032868; GO:0032991; GO:0033574; GO:0035690; GO:0042594; GO:0042802; GO:…	R-HSA-500753;	hsa:790;	P27708;F8VPD4	1	IHRAS(1)DPGLPAEEPKEK	S1859	LPDGRFHLPPRIHRASDPGLPAEEPKEKSSR	17.2677	16.9382	16.8986	17.2425	16.8761	17.3488	17.2007	17.1934	17.1744	17.5227
SYMPK_Q92797.6	-1.58151	-1.3518	0.572965	0.203358	-1.10733	0.467054	0.303211	0.194111	1.35369	0.946256	SYMPK	Symplekin	Q92797	1.01354	0.0189073	0.0320578	-0.261875	FUNCTION: Scaffold protein that functions as a component of a multimolecular complex involved in histone mRNA 3'-end processing. Specific component of the tight junction (TJ) plaque, but might not be an exclusively junctional component. May have a house-keeping rule. Is involved in pre-mRNA polyadenylation. Enhances SSU72 phosphatase activity. {ECO:0000269|PubMed:16230528, ECO:0000269|PubMed:2086…	SUBCELLULAR LOCATION: Cytoplasm, cytoskeleton. Cell junction, tight junction. Cell membrane; Peripheral membrane protein; Cytoplasmic side. Cell junction. Nucleus, nucleoplasm. Note=Cytoplasmic face of adhesion plaques (major) and nucleoplasm (minor) (in cells with TJ). Nucleoplasm (in cells without TJ). Nuclear bodies of heat-stressed cells. Colocalizes with HSF1 in nuclear stress bodies upon he…		cell adhesion [GO:0007155]; mRNA 3'-end processing [GO:0031124]; mRNA export from nucleus [GO:0006406]; mRNA polyadenylation [GO:0006378]; mRNA splicing, via spliceosome [GO:0000398]; negative regulation of protein binding [GO:0032091]; positive regulation of protein dephosphorylation [GO:0035307]; termination of RNA polymerase II transcription [GO:0006369]		bicellular tight junction [GO:0005923]; cytoplasm [GO:0005737]; cytoskeleton [GO:0005856]; cytosol [GO:0005829]; nuclear stress granule [GO:0097165]; nucleoplasm [GO:0005654]; plasma membrane [GO:0005886]	GO:0000398; GO:0005654; GO:0005737; GO:0005829; GO:0005856; GO:0005886; GO:0005923; GO:0006369; GO:0006378; GO:0006406; GO:0007155; GO:0031124; GO:0032091; GO:0035307; GO:0097165	R-HSA-159231;R-HSA-72163;R-HSA-72187;R-HSA-73856;R-HSA-77595;	hsa:8189;	Q92797	0.987207	S(0.12)PQT(0.88)LAPVGEDAMKT(0.013)PS(0.987)PAAEDAREPEAK	S1259	PQTLAPVGEDAMKTPSPAAEDAREPEAKGNS	19.159	19.2051	19.5911	19.517	19.2541	19.5699	19.537	19.5151	19.7477	19.666
SRRM2_Q9UQ35.226	-1.27573	-0.086241	0.291078	-1.03882	-1.06211	-0.173512	0.527947	0.00959735	0.762676	2	SRRM2	Serine/arginine repetitive matrix protein 2	Q9UQ35	1.01783	0.0218577	0.0362852	-0.270801	FUNCTION: Required for pre-mRNA splicing as component of the spliceosome. {ECO:0000269|PubMed:19854871, ECO:0000269|PubMed:28076346, ECO:0000269|PubMed:28502770, ECO:0000269|PubMed:29301961, ECO:0000269|PubMed:29360106, ECO:0000269|PubMed:29361316, ECO:0000269|PubMed:30705154, ECO:0000269|PubMed:9531537}.	SUBCELLULAR LOCATION: Nucleus {ECO:0000269|PubMed:28076346, ECO:0000269|PubMed:28502770, ECO:0000269|PubMed:29301961, ECO:0000269|PubMed:29360106, ECO:0000269|PubMed:29361316, ECO:0000269|PubMed:30705154}. Nucleus speckle {ECO:0000269|PubMed:9531537}.		mRNA splicing, via spliceosome [GO:0000398]	C2H2 zinc finger domain binding [GO:0070742]; mRNA binding [GO:0003729]; protein N-terminus binding [GO:0047485]; RNA binding [GO:0003723]	Cajal body [GO:0015030]; catalytic step 2 spliceosome [GO:0071013]; nuclear speck [GO:0016607]; nucleoplasm [GO:0005654]; nucleus [GO:0005634]; U2-type catalytic step 2 spliceosome [GO:0071007]; U2-type precatalytic spliceosome [GO:0071005]	GO:0000398; GO:0003723; GO:0003729; GO:0005634; GO:0005654; GO:0015030; GO:0016607; GO:0047485; GO:0070742; GO:0071005; GO:0071007; GO:0071013	R-HSA-72163;	hsa:23524;	Q9UQ35	0.922155	NHS(0.922)GS(0.894)RT(0.183)PPVALNSSR	S2100	SDRSRSATPPATRNHSGSRTPPVALNSSRMS	15.0478	15.3017	15.3823	15.0984	15.0934	15.2831	15.4328	15.3222	15.4829	15.7566
FOXK1_P85037.30	-1.77778	-1.3218	-0.382455	0.0593385	-0.489321	0.808557	0.553193	1.45366	0.428059	0.668552	FOXK1	Forkhead box protein K1	P85037	1.01838	0.00291973	0.00663645	-0.29578	FUNCTION: Transcriptional regulator involved in different processes such as glucose metabolism, aerobic glycolysis, muscle cell differentiation and autophagy (By similarity). Recognizes and binds the forkhead DNA sequence motif (5'-GTAAACA-3') and can both act as a transcription activator or repressor, depending on the context (PubMed:17670796). Together with FOXK2, acts as a key regulator of met…	SUBCELLULAR LOCATION: Nucleus {ECO:0000269|PubMed:25805136, ECO:0000269|PubMed:25852164}. Cytoplasm {ECO:0000269|PubMed:25805136, ECO:0000269|PubMed:25852164}. Note=Translocation to the nucleus is regulated by phosphorylation: phosphorylation by GSK3 (GSK3A or GSK3B) promotes interaction with 14-3-3 proteins and sequestration in the cytoplasm. Dephosphorylation promotes translocation to the nucle…		canonical glycolysis [GO:0061621]; cell differentiation [GO:0030154]; cellular glucose homeostasis [GO:0001678]; muscle organ development [GO:0007517]; negative regulation of autophagy [GO:0010507]; negative regulation of transcription, DNA-templated [GO:0045892]; positive regulation of transcription, DNA-templated [GO:0045893]; protein deubiquitination [GO:0016579]; regulation of gluconeogenesis…	14-3-3 protein binding [GO:0071889]; DNA-binding transcription factor activity [GO:0003700]; DNA-binding transcription factor activity, RNA polymerase II-specific [GO:0000981]; DNA-binding transcription repressor activity, RNA polymerase II-specific [GO:0001227]; RNA polymerase II regulatory region sequence-specific DNA binding [GO:0000977]; transcription regulatory region sequence-specific DNA b…	cell [GO:0005623]; cytoplasm [GO:0005737]; nuclear chromatin [GO:0000790]; nucleoplasm [GO:0005654]; nucleus [GO:0005634]	GO:0000790; GO:0000976; GO:0000977; GO:0000981; GO:0001227; GO:0001678; GO:0003700; GO:0005623; GO:0005634; GO:0005654; GO:0005737; GO:0007517; GO:0010507; GO:0010906; GO:0016579; GO:0030154; GO:0035947; GO:0042594; GO:0045892; GO:0045893; GO:0061621; GO:0071889	R-HSA-5689603;	hsa:221937;	P85037;U3KQ26	0.773403	S(0.053)MVS(0.817)PVPS(0.773)PT(0.342)GT(0.02)IS(0.013)VPNS(0.095)CPAS(0.887)PR	S243	HIPEPDLRSMVSPVPSPTGTISVPNSCPASP	15.9033	15.9895	16.167	16.2505	16.1468	16.3921	16.3439	16.5141	16.3202	16.3657
ANKRD17_O75179.6	-1.04091	-0.902115	-0.75258	-0.405069	-1.07492	1.04665	0.285433	0.612535	0.348672	1.8823	ANKRD17	Ankyrin repeat domain-containing protein 17	O75179	1.01941	0.000806218	0.00225577	-0.329271	FUNCTION: Could play pivotal roles in cell cycle and DNA regulation (PubMed:19150984). Involved in innate immune defense against viruse by positively regulating the viral dsRNA receptors DDX58 and IFIH1 signaling pathways (PubMed:22328336). Involves in NOD2- and NOD1-mediated responses to bacteria suggesting a role in innate antibacterial immune pathways too (PubMed:23711367). Target of enterovir…	SUBCELLULAR LOCATION: Cytoplasm {ECO:0000269|PubMed:17276651, ECO:0000269|PubMed:22328336}. Nucleus {ECO:0000269|PubMed:17276651, ECO:0000269|PubMed:19150984, ECO:0000269|PubMed:22328336}. Note=Detected around the nucleolus. Localized on chromatin in a cell cycle-dependent manner. {ECO:0000269|PubMed:17276651, ECO:0000269|PubMed:19150984}.		blood vessel maturation [GO:0001955]; defense response to bacterium [GO:0042742]; innate immune response [GO:0045087]; negative regulation of smooth muscle cell differentiation [GO:0051151]; positive regulation of cell cycle [GO:0045787]; positive regulation of G1/S transition of mitotic cell cycle [GO:1900087]; positive regulation of I-kappaB kinase/NF-kappaB signaling [GO:0043123]; positive reg…	chromatin binding [GO:0003682]; RNA binding [GO:0003723]	chromatin [GO:0000785]; cytoplasm [GO:0005737]; membrane [GO:0016020]; nuclear membrane [GO:0031965]; nucleoplasm [GO:0005654]; nucleus [GO:0005634]	GO:0000785; GO:0001955; GO:0003682; GO:0003723; GO:0005634; GO:0005654; GO:0005737; GO:0006275; GO:0016020; GO:0016032; GO:0031965; GO:0042742; GO:0043123; GO:0045087; GO:0045787; GO:0051151; GO:1900087; GO:1900245; GO:1900246		hsa:26057;	O75179;H0YM23	0.807318	EHYPVS(0.04)S(0.205)PS(0.784)S(0.807)PS(0.164)PPAQPGGVSR	S2045	PMPTAKEHYPVSSPSSPSPPAQPGGVSRNSP	16.9208	16.9482	16.9776	17.0461	16.9141	17.3323	17.1823	17.2468	17.1947	17.4971
BAG3_O95817.26	-0.683219	-0.497854	-0.317263	-1.13496	-1.18814	1.61619	1.51848	0.701847	0.185251	-0.20033	BAG3	BAG family molecular chaperone regulator 3	O95817	1.02225	0.00261195	0.00606493	-0.346855	FUNCTION: Co-chaperone for HSP70 and HSC70 chaperone proteins. Acts as a nucleotide-exchange factor (NEF) promoting the release of ADP from the HSP70 and HSC70 proteins thereby triggering client/substrate protein release. Nucleotide release is mediated via its binding to the nucleotide-binding domain (NBD) of HSPA8/HSC70 where as the substrate release is mediated via its binding to the substrate-…	SUBCELLULAR LOCATION: Nucleus {ECO:0000269|PubMed:26159920}. Cytoplasm {ECO:0000269|PubMed:26159920}. Note=Colocalizes with HSF1 to the nucleus upon heat stress (PubMed:26159920). {ECO:0000269|PubMed:26159920}.	DISEASE: Myopathy, myofibrillar, 6 (MFM6) [MIM:612954]: A form of myofibrillar myopathy, a group of chronic neuromuscular disorders characterized at ultrastructural level by disintegration of the sarcomeric Z disk and myofibrils, and replacement of the normal myofibrillar markings by small dense granules, or larger hyaline masses, or amorphous material. MFM6 is characterized by early-onset of sev…	aggresome assembly [GO:0070842]; autophagosome assembly [GO:0000045]; brain development [GO:0007420]; cellular response to heat [GO:0034605]; cellular response to mechanical stimulus [GO:0071260]; cellular response to unfolded protein [GO:0034620]; chaperone-mediated autophagy [GO:0061684]; chaperone-mediated protein transport [GO:0072321]; extrinsic apoptotic signaling pathway in absence of liga…	adenyl-nucleotide exchange factor activity [GO:0000774]; cadherin binding [GO:0045296]; chaperone binding [GO:0051087]; dynein intermediate chain binding [GO:0045505]; protein-containing complex binding [GO:0044877]	aggresome [GO:0016235]; cell [GO:0005623]; chaperone complex [GO:0101031]; cytoplasm [GO:0005737]; cytosol [GO:0005829]; neuron projection [GO:0043005]; nucleus [GO:0005634]; plasma membrane [GO:0005886]; stress fiber [GO:0001725]; Z disc [GO:0030018]	GO:0000045; GO:0000774; GO:0001725; GO:0005623; GO:0005634; GO:0005737; GO:0005829; GO:0005886; GO:0006457; GO:0007420; GO:0008625; GO:0010664; GO:0016235; GO:0021510; GO:0030018; GO:0034605; GO:0034620; GO:0042307; GO:0043005; GO:0043066; GO:0044877; GO:0045296; GO:0045505; GO:0046716; GO:0046827; GO:0050821; GO:0051087; GO:0061684; GO:0070842; GO:0071260; GO:0072321; GO:0097192; GO:0097201; GO:…	R-HSA-3371453;	hsa:9531;	O95817;C9JFK9	0.837512	S(0.089)S(0.117)T(0.794)PLHS(0.838)PS(0.162)PIR	S289	SSREGSPARSSTPLHSPSPIRVHTVVDRPQQ	15.6048	15.6468	15.6878	15.5023	15.4902	16.1265	16.1044	15.919	15.8018	15.7143
BAG3_O95817.29	-0.683219	-0.497854	-0.317263	-1.13496	-1.18814	1.61619	1.51848	0.701847	0.185251	-0.20033	BAG3	BAG family molecular chaperone regulator 3	O95817	1.02225	0.00261195	0.00606493	-0.346855	FUNCTION: Co-chaperone for HSP70 and HSC70 chaperone proteins. Acts as a nucleotide-exchange factor (NEF) promoting the release of ADP from the HSP70 and HSC70 proteins thereby triggering client/substrate protein release. Nucleotide release is mediated via its binding to the nucleotide-binding domain (NBD) of HSPA8/HSC70 where as the substrate release is mediated via its binding to the substrate-…	SUBCELLULAR LOCATION: Nucleus {ECO:0000269|PubMed:26159920}. Cytoplasm {ECO:0000269|PubMed:26159920}. Note=Colocalizes with HSF1 to the nucleus upon heat stress (PubMed:26159920). {ECO:0000269|PubMed:26159920}.	DISEASE: Myopathy, myofibrillar, 6 (MFM6) [MIM:612954]: A form of myofibrillar myopathy, a group of chronic neuromuscular disorders characterized at ultrastructural level by disintegration of the sarcomeric Z disk and myofibrils, and replacement of the normal myofibrillar markings by small dense granules, or larger hyaline masses, or amorphous material. MFM6 is characterized by early-onset of sev…	aggresome assembly [GO:0070842]; autophagosome assembly [GO:0000045]; brain development [GO:0007420]; cellular response to heat [GO:0034605]; cellular response to mechanical stimulus [GO:0071260]; cellular response to unfolded protein [GO:0034620]; chaperone-mediated autophagy [GO:0061684]; chaperone-mediated protein transport [GO:0072321]; extrinsic apoptotic signaling pathway in absence of liga…	adenyl-nucleotide exchange factor activity [GO:0000774]; cadherin binding [GO:0045296]; chaperone binding [GO:0051087]; dynein intermediate chain binding [GO:0045505]; protein-containing complex binding [GO:0044877]	aggresome [GO:0016235]; cell [GO:0005623]; chaperone complex [GO:0101031]; cytoplasm [GO:0005737]; cytosol [GO:0005829]; neuron projection [GO:0043005]; nucleus [GO:0005634]; plasma membrane [GO:0005886]; stress fiber [GO:0001725]; Z disc [GO:0030018]	GO:0000045; GO:0000774; GO:0001725; GO:0005623; GO:0005634; GO:0005737; GO:0005829; GO:0005886; GO:0006457; GO:0007420; GO:0008625; GO:0010664; GO:0016235; GO:0021510; GO:0030018; GO:0034605; GO:0034620; GO:0042307; GO:0043005; GO:0043066; GO:0044877; GO:0045296; GO:0045505; GO:0046716; GO:0046827; GO:0050821; GO:0051087; GO:0061684; GO:0070842; GO:0071260; GO:0072321; GO:0097192; GO:0097201; GO:…	R-HSA-3371453;	hsa:9531;	O95817;C9JFK9	0.79426	S(0.089)S(0.117)T(0.794)PLHS(0.838)PS(0.162)PIR	T285	VQGASSREGSPARSSTPLHSPSPIRVHTVVD	15.6048	15.6468	15.6878	15.5023	15.4902	16.1265	16.1044	15.919	15.8018	15.7143
UTP18_Q9Y5J1.11	-0.891742	-0.826564	-0.939299	-1.12453	-0.748994	0.700535	0.331079	0.946111	1.44745	1.10595	UTP18	U3 small nucleolar RNA-associated protein 18 homolog	Q9Y5J1	1.0288	9.1853e-06	6.96485e-05	-0.525038	FUNCTION: Involved in nucleolar processing of pre-18S ribosomal RNA. {ECO:0000250}.	SUBCELLULAR LOCATION: Nucleus, nucleolus {ECO:0000269|PubMed:12429849}.		rRNA processing [GO:0006364]	RNA binding [GO:0003723]	nuclear membrane [GO:0031965]; nucleolus [GO:0005730]; nucleoplasm [GO:0005654]; nucleus [GO:0005634]; Pwp2p-containing subcomplex of 90S preribosome [GO:0034388]; small-subunit processome [GO:0032040]	GO:0003723; GO:0005634; GO:0005654; GO:0005730; GO:0006364; GO:0031965; GO:0032040; GO:0034388	R-HSA-6790901;R-HSA-6791226;	hsa:51096;	Q9Y5J1	0.993563	KT(0.082)S(0.951)S(0.994)DDES(0.973)EEDEDDLLQR	S206	GGVPAWAETTKRKTSSDDESEEDEDDLLQRT	18.2333	18.2522	18.2195	18.1659	18.2747	18.6946	18.5875	18.7657	18.9109	18.812
SRRM2_Q9UQ35.314	-1.39349	-1.06362	-0.879868	0.0924822	-0.975856	0.894117	0.380919	1.1951	0.496001	1.25421	SRRM2	Serine/arginine repetitive matrix protein 2	Q9UQ35	1.03881	0.000103876	0.000448404	-0.592801	FUNCTION: Required for pre-mRNA splicing as component of the spliceosome. {ECO:0000269|PubMed:19854871, ECO:0000269|PubMed:28076346, ECO:0000269|PubMed:28502770, ECO:0000269|PubMed:29301961, ECO:0000269|PubMed:29360106, ECO:0000269|PubMed:29361316, ECO:0000269|PubMed:30705154, ECO:0000269|PubMed:9531537}.	SUBCELLULAR LOCATION: Nucleus {ECO:0000269|PubMed:28076346, ECO:0000269|PubMed:28502770, ECO:0000269|PubMed:29301961, ECO:0000269|PubMed:29360106, ECO:0000269|PubMed:29361316, ECO:0000269|PubMed:30705154}. Nucleus speckle {ECO:0000269|PubMed:9531537}.		mRNA splicing, via spliceosome [GO:0000398]	C2H2 zinc finger domain binding [GO:0070742]; mRNA binding [GO:0003729]; protein N-terminus binding [GO:0047485]; RNA binding [GO:0003723]	Cajal body [GO:0015030]; catalytic step 2 spliceosome [GO:0071013]; nuclear speck [GO:0016607]; nucleoplasm [GO:0005654]; nucleus [GO:0005634]; U2-type catalytic step 2 spliceosome [GO:0071007]; U2-type precatalytic spliceosome [GO:0071005]	GO:0000398; GO:0003723; GO:0003729; GO:0005634; GO:0005654; GO:0015030; GO:0016607; GO:0047485; GO:0070742; GO:0071005; GO:0071007; GO:0071013	R-HSA-72163;	hsa:23524;	Q9UQ35;I3L4D8;I3L182	0.948273	YSHS(0.042)GS(0.948)S(0.219)S(0.757)PDT(0.034)K	S972	SNVESRLLPRYSHSGSSSPDTKVKPETPPRQ	15.0834	15.1992	15.2638	15.6052	15.23	15.8867	15.7065	15.9924	15.7469	16.0131
MAP1B_P46821.30	-0.592258	-1.24643	-1.12319	-0.35254	-1.08791	0.643668	0.615289	0.731162	0.825708	1.5865	MAP1B	Microtubule-associated protein 1B;MAP1B heavy chain;MAP1 light chain LC1	P46821	1.03775	1.00625e-05	7.50522e-05	-0.774027	FUNCTION: Facilitates tyrosination of alpha-tubulin in neuronal microtubules (By similarity). Phosphorylated MAP1B may play a role in the cytoskeletal changes that accompany neurite extension. Possibly MAP1B binds to at least two tubulin subunits in the polymer, and this bridging of subunits might be involved in nucleating microtubule polymerization and in stabilizing microtubules. Acts as a posi…	SUBCELLULAR LOCATION: Cytoplasm, cytoskeleton {ECO:0000269|PubMed:18195017}. Cytoplasm {ECO:0000269|PubMed:18195017}. Cell junction, synapse {ECO:0000250}. Cell projection, dendritic spine {ECO:0000250}. Note=Colocalizes with DAPK1 in the microtubules and cortical actin fibers. {ECO:0000250}.; SUBCELLULAR LOCATION: MAP1 light chain LC1: Cytoplasm {ECO:0000250|UniProtKB:P14873}.		axon extension [GO:0048675]; axonogenesis [GO:0007409]; cellular process [GO:0009987]; cellular response to growth factor stimulus [GO:0071363]; cellular response to peptide hormone stimulus [GO:0071375]; dendrite development [GO:0016358]; developmental maturation [GO:0021700]; establishment of monopolar cell polarity [GO:0061162]; induction of synaptic plasticity by chemical substance [GO:005191…	actin binding [GO:0003779]; microtubule binding [GO:0008017]; phospholipid binding [GO:0005543]; protein-containing complex binding [GO:0044877]; structural molecule activity [GO:0005198]; tubulin binding [GO:0015631]	apical dendrite [GO:0097440]; axon [GO:0030424]; basal dendrite [GO:0097441]; cell junction [GO:0030054]; cell projection [GO:0042995]; cytosol [GO:0005829]; dendrite [GO:0030425]; dendritic spine [GO:0043197]; growth cone [GO:0030426]; hippocampal mossy fiber [GO:0097457]; microtubule [GO:0005874]; microtubule associated complex [GO:0005875]; neuronal cell body [GO:0043025]; perikaryon [GO:00432…	GO:0000226; GO:0001578; GO:0001750; GO:0001764; GO:0003779; GO:0005198; GO:0005543; GO:0005829; GO:0005874; GO:0005875; GO:0005886; GO:0007026; GO:0007409; GO:0007416; GO:0008017; GO:0009612; GO:0009743; GO:0009987; GO:0010035; GO:0014012; GO:0014069; GO:0015631; GO:0016358; GO:0017085; GO:0021700; GO:0030054; GO:0030424; GO:0030425; GO:0030426; GO:0031114; GO:0031116; GO:0032355; GO:0032387; GO:…		hsa:4131;	P46821	0.994518	ES(0.005)S(0.995)PLYS(0.999)PT(0.001)FSDSTSAVK	S1793	LSPKSDISPLTPRESSPLYSPTFSDSTSAVK	20.6329	20.3454	20.3995	20.7383	20.415	21.1762	21.1637	21.2146	21.2562	21.5906
MAP1B_P46821.31	-0.592258	-1.24643	-1.12319	-0.35254	-1.08791	0.643668	0.615289	0.731162	0.825708	1.5865	MAP1B	Microtubule-associated protein 1B;MAP1B heavy chain;MAP1 light chain LC1	P46821	1.03775	1.00625e-05	7.50522e-05	-0.774027	FUNCTION: Facilitates tyrosination of alpha-tubulin in neuronal microtubules (By similarity). Phosphorylated MAP1B may play a role in the cytoskeletal changes that accompany neurite extension. Possibly MAP1B binds to at least two tubulin subunits in the polymer, and this bridging of subunits might be involved in nucleating microtubule polymerization and in stabilizing microtubules. Acts as a posi…	SUBCELLULAR LOCATION: Cytoplasm, cytoskeleton {ECO:0000269|PubMed:18195017}. Cytoplasm {ECO:0000269|PubMed:18195017}. Cell junction, synapse {ECO:0000250}. Cell projection, dendritic spine {ECO:0000250}. Note=Colocalizes with DAPK1 in the microtubules and cortical actin fibers. {ECO:0000250}.; SUBCELLULAR LOCATION: MAP1 light chain LC1: Cytoplasm {ECO:0000250|UniProtKB:P14873}.		axon extension [GO:0048675]; axonogenesis [GO:0007409]; cellular process [GO:0009987]; cellular response to growth factor stimulus [GO:0071363]; cellular response to peptide hormone stimulus [GO:0071375]; dendrite development [GO:0016358]; developmental maturation [GO:0021700]; establishment of monopolar cell polarity [GO:0061162]; induction of synaptic plasticity by chemical substance [GO:005191…	actin binding [GO:0003779]; microtubule binding [GO:0008017]; phospholipid binding [GO:0005543]; protein-containing complex binding [GO:0044877]; structural molecule activity [GO:0005198]; tubulin binding [GO:0015631]	apical dendrite [GO:0097440]; axon [GO:0030424]; basal dendrite [GO:0097441]; cell junction [GO:0030054]; cell projection [GO:0042995]; cytosol [GO:0005829]; dendrite [GO:0030425]; dendritic spine [GO:0043197]; growth cone [GO:0030426]; hippocampal mossy fiber [GO:0097457]; microtubule [GO:0005874]; microtubule associated complex [GO:0005875]; neuronal cell body [GO:0043025]; perikaryon [GO:00432…	GO:0000226; GO:0001578; GO:0001750; GO:0001764; GO:0003779; GO:0005198; GO:0005543; GO:0005829; GO:0005874; GO:0005875; GO:0005886; GO:0007026; GO:0007409; GO:0007416; GO:0008017; GO:0009612; GO:0009743; GO:0009987; GO:0010035; GO:0014012; GO:0014069; GO:0015631; GO:0016358; GO:0017085; GO:0021700; GO:0030054; GO:0030424; GO:0030425; GO:0030426; GO:0031114; GO:0031116; GO:0032355; GO:0032387; GO:…		hsa:4131;	P46821	0.999453	ES(0.005)S(0.995)PLYS(0.999)PT(0.001)FSDSTSAVK	S1797	SDISPLTPRESSPLYSPTFSDSTSAVKEKTA	20.6329	20.3454	20.3995	20.7383	20.415	21.1762	21.1637	21.2146	21.2562	21.5906
PDCD4_Q53EL6.1	-0.721947	-1.08644	-1.11223	-0.672696	-1.00972	1.12392	0.922745	0.574404	0.690461	1.29151	PDCD4	Programmed cell death protein 4	Q53EL6	1.05488	2.25054e-07	5.62205e-06	-0.889974	FUNCTION: Inhibits translation initiation and cap-dependent translation. May excert its function by hindering the interaction between EIF4A1 and EIF4G. Inhibits the helicase activity of EIF4A. Modulates the activation of JUN kinase. Down-regulates the expression of MAP4K1, thus inhibiting events important in driving invasion, namely, MAPK85 activation and consequent JUN-dependent transcription. M…	SUBCELLULAR LOCATION: Nucleus {ECO:0000250|UniProtKB:Q61823}. Cytoplasm {ECO:0000250|UniProtKB:Q61823}. Note=Shuttles between the nucleus and cytoplasm (By similarity). Predominantly nuclear under normal growth conditions, and when phosphorylated at Ser-457 (PubMed:16357133). {ECO:0000269|PubMed:16357133}.		apoptotic process [GO:0006915]; BMP signaling pathway [GO:0030509]; cell aging [GO:0007569]; cellular response to lipopolysaccharide [GO:0071222]; epithelial to mesenchymal transition involved in cardiac fibroblast development [GO:0060940]; interleukin-12-mediated signaling pathway [GO:0035722]; negative regulation of apoptotic process [GO:0043066]; negative regulation of cell cycle [GO:0045786];…	RNA binding [GO:0003723]	cytoplasm [GO:0005737]; cytosol [GO:0005829]; nucleus [GO:0005634]	GO:0003723; GO:0005634; GO:0005737; GO:0005829; GO:0006915; GO:0007569; GO:0030509; GO:0035722; GO:0043066; GO:0043508; GO:0045786; GO:0045892; GO:0050729; GO:0060940; GO:0071222; GO:1900016; GO:1901224; GO:1904706; GO:1904761; GO:1905064; GO:1905461; GO:2000353	R-HSA-8950505;	hsa:27250;	Q53EL6	1	FVS(1)EGDGGR	S457	QLRDLCPSRGRKRFVSEGDGGRLKPESY___	16.3124	16.1362	16.1237	16.3362	16.1733	17.2046	17.1074	16.939	16.9951	17.2856
EEF1D_E9PQ49.1	-0.946251	-1.00663	-0.988632	-0.617089	-1.09501	1.12355	1.04555	1.1118	0.674689	0.698018	EEF1D	Elongation factor 1-delta	E9PQ49	1.04961	2.82757e-08	1.99496e-06	-1.01958					translation elongation factor activity [GO:0003746]	eukaryotic translation elongation factor 1 complex [GO:0005853]	GO:0003746; GO:0005853			E9PQ49;E9PI39;E9PK01;A0A087X1X7;E9PRY8;P29692;E9PL71;E9PQZ1;H0YE72	1	PATPAEDDEDDDIDLFGS(1)DNEEEDKEAAQLREER	S162	TPAEDDEDDDIDLFGSDNEEEDKEAAQLREE	20.5452	20.5122	20.522	20.7255	20.4637	21.6789	21.6362	21.6725	21.4331	21.4459
SRRM2_Q9UQ35.204	-0.810463	-0.867158	-0.655172	-0.506774	-1.29382	0.406354	0.245532	0.697068	0.825078	1.95936	SRRM2	Serine/arginine repetitive matrix protein 2	Q9UQ35	1.07578	9.65554e-05	0.000422345	-1.03186	FUNCTION: Required for pre-mRNA splicing as component of the spliceosome. {ECO:0000269|PubMed:19854871, ECO:0000269|PubMed:28076346, ECO:0000269|PubMed:28502770, ECO:0000269|PubMed:29301961, ECO:0000269|PubMed:29360106, ECO:0000269|PubMed:29361316, ECO:0000269|PubMed:30705154, ECO:0000269|PubMed:9531537}.	SUBCELLULAR LOCATION: Nucleus {ECO:0000269|PubMed:28076346, ECO:0000269|PubMed:28502770, ECO:0000269|PubMed:29301961, ECO:0000269|PubMed:29360106, ECO:0000269|PubMed:29361316, ECO:0000269|PubMed:30705154}. Nucleus speckle {ECO:0000269|PubMed:9531537}.		mRNA splicing, via spliceosome [GO:0000398]	C2H2 zinc finger domain binding [GO:0070742]; mRNA binding [GO:0003729]; protein N-terminus binding [GO:0047485]; RNA binding [GO:0003723]	Cajal body [GO:0015030]; catalytic step 2 spliceosome [GO:0071013]; nuclear speck [GO:0016607]; nucleoplasm [GO:0005654]; nucleus [GO:0005634]; U2-type catalytic step 2 spliceosome [GO:0071007]; U2-type precatalytic spliceosome [GO:0071005]	GO:0000398; GO:0003723; GO:0003729; GO:0005634; GO:0005654; GO:0015030; GO:0016607; GO:0047485; GO:0070742; GO:0071005; GO:0071007; GO:0071013	R-HSA-72163;	hsa:23524;	Q9UQ35	0.999985	GRS(1)ECDS(0.013)S(0.987)PEPK	S1478	SPGMKDIPRTPSRGRSECDSSPEPKALPQTP	13.6269	13.5915	13.7238	13.8164	13.3252	14.3863	14.2859	14.5677	14.6476	15.3555
PDCD4_Q53EL6	-1.08621	-1.02218	-0.968846	-0.659046	-0.879142	0.703536	0.545712	1.13656	0.942651	1.28696	PDCD4	Programmed cell death protein 4	Q53EL6	1.09161	5.728e-08	2.76906e-06	-1.18276	FUNCTION: Inhibits translation initiation and cap-dependent translation. May excert its function by hindering the interaction between EIF4A1 and EIF4G. Inhibits the helicase activity of EIF4A. Modulates the activation of JUN kinase. Down-regulates the expression of MAP4K1, thus inhibiting events important in driving invasion, namely, MAPK85 activation and consequent JUN-dependent transcription. M…	SUBCELLULAR LOCATION: Nucleus {ECO:0000250|UniProtKB:Q61823}. Cytoplasm {ECO:0000250|UniProtKB:Q61823}. Note=Shuttles between the nucleus and cytoplasm (By similarity). Predominantly nuclear under normal growth conditions, and when phosphorylated at Ser-457 (PubMed:16357133). {ECO:0000269|PubMed:16357133}.		apoptotic process [GO:0006915]; BMP signaling pathway [GO:0030509]; cell aging [GO:0007569]; cellular response to lipopolysaccharide [GO:0071222]; epithelial to mesenchymal transition involved in cardiac fibroblast development [GO:0060940]; interleukin-12-mediated signaling pathway [GO:0035722]; negative regulation of apoptotic process [GO:0043066]; negative regulation of cell cycle [GO:0045786];…	RNA binding [GO:0003723]	cytoplasm [GO:0005737]; cytosol [GO:0005829]; nucleus [GO:0005634]	GO:0003723; GO:0005634; GO:0005737; GO:0005829; GO:0006915; GO:0007569; GO:0030509; GO:0035722; GO:0043066; GO:0043508; GO:0045786; GO:0045892; GO:0050729; GO:0060940; GO:0071222; GO:1900016; GO:1901224; GO:1904706; GO:1904761; GO:1905064; GO:1905461; GO:2000353	R-HSA-8950505;	hsa:27250;	Q53EL6;Q5VZS7	0.79329	DSGRGDS(0.793)VS(0.207)DSGSDALR	S76	RRLRKNSSRDSGRGDSVSDSGSDALRSGLTV	12.8057	12.8467	12.8809	13.0794	12.9384	13.9523	13.8512	14.2297	14.1055	14.3261
SRRM2_Q9UQ35.191	-1.03662	-1.21383	-1.02703	-0.25836	-1.02143	0.92879	0.842619	0.850593	0.724358	1.21091	SRRM2	Serine/arginine repetitive matrix protein 2	Q9UQ35	1.07165	2.45603e-07	5.85523e-06	-1.26041	FUNCTION: Required for pre-mRNA splicing as component of the spliceosome. {ECO:0000269|PubMed:19854871, ECO:0000269|PubMed:28076346, ECO:0000269|PubMed:28502770, ECO:0000269|PubMed:29301961, ECO:0000269|PubMed:29360106, ECO:0000269|PubMed:29361316, ECO:0000269|PubMed:30705154, ECO:0000269|PubMed:9531537}.	SUBCELLULAR LOCATION: Nucleus {ECO:0000269|PubMed:28076346, ECO:0000269|PubMed:28502770, ECO:0000269|PubMed:29301961, ECO:0000269|PubMed:29360106, ECO:0000269|PubMed:29361316, ECO:0000269|PubMed:30705154}. Nucleus speckle {ECO:0000269|PubMed:9531537}.		mRNA splicing, via spliceosome [GO:0000398]	C2H2 zinc finger domain binding [GO:0070742]; mRNA binding [GO:0003729]; protein N-terminus binding [GO:0047485]; RNA binding [GO:0003723]	Cajal body [GO:0015030]; catalytic step 2 spliceosome [GO:0071013]; nuclear speck [GO:0016607]; nucleoplasm [GO:0005654]; nucleus [GO:0005634]; U2-type catalytic step 2 spliceosome [GO:0071007]; U2-type precatalytic spliceosome [GO:0071005]	GO:0000398; GO:0003723; GO:0003729; GO:0005634; GO:0005654; GO:0015030; GO:0016607; GO:0047485; GO:0070742; GO:0071005; GO:0071007; GO:0071013	R-HSA-72163;	hsa:23524;	Q9UQ35	0.700584	ELS(0.701)NS(0.299)PLRENS(0.009)FGS(0.991)PLEFR	s1318	SSWGGPHFSPEHKELSNSPLRENSFGSPLEF	17.5055	17.383	17.5121	18.0436	17.516	18.8644	18.8049	18.8104	18.7231	19.0595
SRRM2_Q9UQ35.192	-1.03662	-1.21383	-1.02703	-0.25836	-1.02143	0.92879	0.842619	0.850593	0.724358	1.21091	SRRM2	Serine/arginine repetitive matrix protein 2	Q9UQ35	1.07165	2.45603e-07	5.85523e-06	-1.26041	FUNCTION: Required for pre-mRNA splicing as component of the spliceosome. {ECO:0000269|PubMed:19854871, ECO:0000269|PubMed:28076346, ECO:0000269|PubMed:28502770, ECO:0000269|PubMed:29301961, ECO:0000269|PubMed:29360106, ECO:0000269|PubMed:29361316, ECO:0000269|PubMed:30705154, ECO:0000269|PubMed:9531537}.	SUBCELLULAR LOCATION: Nucleus {ECO:0000269|PubMed:28076346, ECO:0000269|PubMed:28502770, ECO:0000269|PubMed:29301961, ECO:0000269|PubMed:29360106, ECO:0000269|PubMed:29361316, ECO:0000269|PubMed:30705154}. Nucleus speckle {ECO:0000269|PubMed:9531537}.		mRNA splicing, via spliceosome [GO:0000398]	C2H2 zinc finger domain binding [GO:0070742]; mRNA binding [GO:0003729]; protein N-terminus binding [GO:0047485]; RNA binding [GO:0003723]	Cajal body [GO:0015030]; catalytic step 2 spliceosome [GO:0071013]; nuclear speck [GO:0016607]; nucleoplasm [GO:0005654]; nucleus [GO:0005634]; U2-type catalytic step 2 spliceosome [GO:0071007]; U2-type precatalytic spliceosome [GO:0071005]	GO:0000398; GO:0003723; GO:0003729; GO:0005634; GO:0005654; GO:0015030; GO:0016607; GO:0047485; GO:0070742; GO:0071005; GO:0071007; GO:0071013	R-HSA-72163;	hsa:23524;	Q9UQ35	0.99136	ELS(0.701)NS(0.299)PLRENS(0.009)FGS(0.991)PLEFR	S1329	HKELSNSPLRENSFGSPLEFRNSGPLGTEMN	17.5055	17.383	17.5121	18.0436	17.516	18.8644	18.8049	18.8104	18.7231	19.0595
